# Supplementary material
Source: ML conference proceedings conference paper supplement (https://openreview.net/forum?id=gywQnORzJX)
Supplement: supplementary_material [file attachment]

# 1 Component Top Examples

*All indices used here are 0-based unless stated otherwise. Note that section indices will be 1-based though.*

## 1.1 Component 0

[LABEL] entailment [PRED] entailment [COEFF] 36.0252

[P] A brown dog is running through a river.

[H] An animal running

[LABEL] entailment [PRED] entailment [COEFF] 33.5824

[P] The brown dog is laying down on a blue sheet.

[H] An animal is laying down.

[LABEL] entailment [PRED] entailment [COEFF] 33.4161

[P] A small brown and black dog playing with a toy

[H] An animal is playing.

[LABEL] entailment [PRED] entailment [COEFF] 32.9659

[P] Two dogs appear to be kissing with one another on flat ground.

[H] Animals are close together.

[LABEL] entailment [PRED] entailment [COEFF] 29.5676

[P] A little brown dog is running in the snow.

[H] An animal in snow.

[LABEL] entailment [PRED] entailment [COEFF] 28.6355

[P] A brown dog is standing in the water.

[H] An animal in the water

[LABEL] entailment [PRED] entailment [COEFF] 28.5531

[P] The brown dog is walking through a river surrounded by bushes.

[H] An animal is by bushes and a body of water.

[LABEL] entailment [PRED] entailment [COEFF] 27.8564

[P] A newly bathed dog is wrapped in a blanket by a caring woman.

[H] An animal has just been bathed.

[LABEL] entailment [PRED] entailment [COEFF] 27.7152

[P] A yellow dog running across a lush green lawn.

[H] An animal is outdoors.

[LABEL] entailment [PRED] entailment [COEFF] 26.8602

[P] Dog running out of tunnel on obstacle course

[H] An animal is running an obstacle course.

[LABEL] entailment [PRED] entailment [COEFF] 25.6953

[P] A large dog is leaping over some logs in a woodland clearing.

[H] An animal is jumping over things.

[LABEL] entailment [PRED] entailment [COEFF] 24.9294

[P] A dog running with his tongue out.

[H] An animal is running around.

[LABEL] entailment [PRED] entailment [COEFF] 23.6145

[P] A dog is leaping for a tennis ball.

[H] An animal is leaping

[LABEL] entailment [PRED] entailment [COEFF] 22.8276

[P] A brown dog carries something in his mouth while walking through snow.

[H] An animal walks through snow.

[LABEL] entailment [PRED] entailment [COEFF] 22.7979

[P] Little brown dog sticking head in a colorful bag filled with cloth.

[H] There is an animal near cloth.

[LABEL] entailment [PRED] entailment [COEFF] 22.6691

[P] A white dog with brown spots on his face with a stick in his mouth swimming in water.

[H] There is an animal swimming in water.

## 1.2 Component 1

[LABEL] contradiction [PRED] contradiction [COEFF] 48.7587

[P] A female kicking a soccer ball while in front of a soccer goal.

[H] The woman is taking a nap.

[LABEL] contradiction [PRED] contradiction [COEFF] 48.5947

[P] Middle - aged hispanic woman sweeping a sidewalk.

[H] Hispanic woman is taking a nap.

[LABEL] contradiction [PRED] contradiction [COEFF] 40.2034

[P] A little boy is playing in a blow up toy.

[H] A little boy is napping.

[LABEL] contradiction [PRED] contradiction [COEFF] 36.2043

[P] A girl reaching down into the water while standing at the edge of a river.

[H] She is taking a nap.

[LABEL] contradiction [PRED] contradiction [COEFF] 36.0318

[P] A toddler aged child is waving two flags with park benches in the background.

[H] A child is taking a nap.

[LABEL] contradiction [PRED] contradiction [COEFF] 35.7805

[P] A white and brown dog is leaping through the air.

[H] The dog is taking a nap.

[LABEL] contradiction [PRED] contradiction [COEFF] 33.2773

[P] A boy is playing warning device.

[H] The boy is taking a nap.

[LABEL] contradiction [PRED] contradiction [COEFF] 32.9082

[P] A young girl cleaning up.

[H] The girl is taking a nap

[LABEL] contradiction [PRED] contradiction [COEFF] 32.4625

[P] A black dog holding a weight in its mouth stands next to a person.

[H] A dog is taking a nap.

[LABEL] contradiction [PRED] contradiction [COEFF] 29.2276

[P] A young boy drinks out of a cup as his friends play in the background

[H] The boy is taking a nap.

[LABEL] contradiction [PRED] neutral [COEFF] 28.3551

[P] The two girls are playing on a yellow and red jungle gym.

[H] The children are taking a nap.

[LABEL] contradiction [PRED] contradiction [COEFF] 26.7208

[P] A dog jumps to catch a flying disc.

[H] The dog is napping.

[LABEL] contradiction [PRED] contradiction [COEFF] 26.6067

[P] Five people playing a board game on a table filled with snacks and candles sitting in a corner of a room with book shelves behind them.

[H] The five people were taking power naps.

[LABEL] contradiction [PRED] contradiction [COEFF] 25.5819

[P] A man on a green bench is talking on his cellphone.

[H] A man napping

[LABEL] contradiction [PRED] contradiction [COEFF] 24.4546

[P] A brown and black dog is jumping to catch a red ball.

[H] Two dogs are taking a nap.

[LABEL] contradiction [PRED] contradiction [COEFF] 23.6868

[P] Two people dressed in their bicycle attire racing against each other or in a marathon race, racing on pavement.

[H] Two people are taking a nap.

### 1.3 Component 2

[LABEL] **contradiction** [PRED] **contradiction** [COEFF] 27.4127

[P] An elderly woman is cleaning a door with a mop.

[H] The woman is very young

[LABEL] **contradiction** [PRED] **contradiction** [COEFF] 27.1023

[P] An elderly woman is sitting down on the stone steps leading to impressive stonework.

[H] The woman is very young.

[LABEL] **contradiction** [PRED] **contradiction** [COEFF] 26.9634

[P] An elderly woman with missing teeth holding a flower.

[H] The woman is young.

[LABEL] **contradiction** [PRED] **contradiction** [COEFF] 26.5933

[P] An elderly woman is at a restaurant.

[H] There is a young woman.

[LABEL] **contradiction** [PRED] **contradiction** [COEFF] 20.7117

[P] Two elderly men are talking on a front porch.

[H] The young men argue on the front porch.

[LABEL] **contradiction** [PRED] **contradiction** [COEFF] 20.5396

[P] Two elderly people are taking a walk down a tree lined path.

[H] Three young people are taking a walk down a tree lined path.

[LABEL] **contradiction** [PRED] **contradiction** [COEFF] 20.1028

[P] An elderly street vendor is talking on his cellphone.

[H] A young street vendor is talking in his phone.

[LABEL] **contradiction** [PRED] **contradiction** [COEFF] 18.0788

[P] An elderly man with his hands placed upon some kind of barrel in a truck yard.

[H] There is a young man.

[LABEL] **contradiction** [PRED] **contradiction** [COEFF] 16.7526

[P] A group of elderly men and women sit at tables outside under an awning, as others stand observing.

[H] A group of young men are playing poker.

[LABEL] **contradiction** [PRED] **contradiction** [COEFF] 16.6457

[P] Elderly people are sitting together at tables and talking.

[H] Young people are sitting together at tables and talking.

[LABEL] **contradiction** [PRED] **contradiction** [COEFF] 16.5563

[P] A old man washing the windows of city lights books.

[H] There is a young man.

[LABEL] **contradiction** [PRED] **contradiction** [COEFF] 16.1401

[P] A old man in a white shirt is eating a bun.

[H] A young man eats a snack.

[LABEL] **contradiction** [PRED] **contradiction** [COEFF] 15.3305

[P] An elderly man is standing outside at night.

[H] A young boy is sitting outside at night.

[LABEL] **contradiction** [PRED] **contradiction** [COEFF] 14.8043

[P] A group of elderly people are meeting together in a room.

[H] The school children met in their classroom.

[LABEL] **contradiction** [PRED] **contradiction** [COEFF] 14.6372

[P] An older man wearing a leather coat and cowboy hat by a mailbox standing on the street near a flock of pigeons.

[H] The man is very young.

[LABEL] **contradiction** [PRED] **contradiction** [COEFF] 14.2669

[P] An older man working with his hands in a workshop.

[H] A young man is working with his hands in his father's workshop.

## 1.4 Component 3

[LABEL] **neutral** [PRED] **neutral** [COEFF] 21.7448

[P] A woman is taking a picture with her camera.

[H] A woman is taking a picture of a house.

[LABEL] **neutral** [PRED] **neutral** [COEFF] 21.3761

[P] A woman is pushing a red stroller down a sidewalk.

[H] A lady is pushing a stroller with three babies.

[LABEL] **neutral** [PRED] **neutral** [COEFF] 20.1738

[P] 2 women wearing brightly colored clothes are sitting next to a dirt road on a rock having a conversation while they're watching the field.

[H] 2 women sitting next to a dirt road, having a conversation about lunch last week.

[LABEL] **neutral** [PRED] **neutral** [COEFF] 19.6292

[P] A man with a large camera is taking photographs.

[H] Man taking photographs of his family.

[LABEL] **neutral** [PRED] **neutral** [COEFF] 19.3897

[P] A black dog runs on the beach.

[H] A dog runs after a ball on the beach.

[LABEL] **neutral** [PRED] **neutral** [COEFF] 19.1972

[P] A man is rock climbing under a large cliff.

[H] A man is rock climbing to reach a rare plant.

[LABEL] **neutral** [PRED] **neutral** [COEFF] 18.2090

[P] Two women with short hair are discussing something.

[H] Two women talk about the weather in the park.

[LABEL] **neutral** [PRED] **neutral** [COEFF] 17.9557

[P] A dog runs on the green grass near a wooden fence.

[H] The dog is running after a bird.

[LABEL] **neutral** [PRED] **neutral** [COEFF] 17.8826

[P] A woman looks down in a steeply - angled asphalt parking lot next to a blue - roofed building.

[H] A woman looks down in an asphalt parking lot next to her workplace trying to find a ring she dropped.

[LABEL] **neutral** [PRED] **neutral** [COEFF] 17.6229

[P] A dog runs behind another at a park.

[H] One mean dog is running off a poodle.

[LABEL] **neutral** [PRED] **neutral** [COEFF] 17.5600

[P] A boy wearing a yellow shirt and blue pants is climbing on a tree branch in a grassy field.

[H] A child climbs a tree to retrieve a kite.

[LABEL] **neutral** [PRED] **neutral** [COEFF] 17.3233

[P] A man is taking a picture with a camera.

[H] The man is taking a picture of the beach.

[LABEL] **neutral** [PRED] **neutral** [COEFF] 17.1333

[P] A man talks on his cellphone on top of a construction scaffold.

[H] The man is talking on his cellphone to his child.

[LABEL] **contradiction** [PRED] **neutral** [COEFF] 17.0001

[P] A street blocked off and guarded with one man in a striped shirt standing in the cleared road.

[H] A street blocked off and guarded to be used as a runway for airforce one.

[LABEL] **neutral** [PRED] **neutral** [COEFF] 16.7490

[P] Many people, including a man on a bicycle, are crossing a busy street.

[H] People trying to cross a busy street to get to the movie theater

[LABEL] **neutral** [PRED] **neutral** [COEFF] 16.7152

[P] Two dogs in a grassy park playing.

[H] Dogs playing in a park with a bunny.

## 1.5 Component 4

[LABEL] **entailment** [PRED] **entailment** [COEFF] 6.7570

[P] A group of people in a yellow and white tent watch a man in black clothes play the guitar.

[H] A group of people watching a man play guitar.

[LABEL] entailment [PRED] entailment [COEFF] 6.7428  
[P] A person jumping in the air while holding onto a string attached to a large balloon as others watch.  
[H] A person is jumping in the air with a balloon.

[LABEL] entailment [PRED] entailment [COEFF] 6.2932  
[P] A man with a bright yellow jacket is riding a motorcycle labeled " police. "  
[H] A man is riding a motorcycle.

[LABEL] entailment [PRED] entailment [COEFF] 6.2520  
[P] A man under colorful stage lights playing a guitar.  
[H] A man plays a guitar.

[LABEL] entailment [PRED] entailment [COEFF] 5.9487  
[P] A boy in blue and white on rollerskates holds hockey stick with a black ball at the end of it.  
[H] A boy holds a hockey stick.

[LABEL] entailment [PRED] entailment [COEFF] 5.7098  
[P] A group of people wearing boy scout uniforms.  
[H] A group of people wearing uniforms.

[LABEL] entailment [PRED] entailment [COEFF] 5.5974  
[P] Some africans are shopping at an open air market for green vegetables.  
[H] Some africans are shopping for vegetables.

[LABEL] entailment [PRED] entailment [COEFF] 5.5089  
[P] Two men in bright yellow suits and wearing hearing protection are operating a yellow and black machine.  
[H] Two men are operating a machine.

[LABEL] entailment [PRED] entailment [COEFF] 5.3726  
[P] A man in black - yellow carnival feathers, playing the drum.  
[H] Man playing drums.

[LABEL] entailment [PRED] entailment [COEFF] 5.2561  
[P] A skateboarder attempts to do a trick over a homemade ramp.  
[H] A skateboarder attempts a trick.

[LABEL] entailment [PRED] entailment [COEFF] 5.2391  
[P] A group of men wearing kilts throwing a long wooden stick.  
[H] A group of men are throwing sticks.

[LABEL] entailment [PRED] entailment [COEFF] 4.9880  
[P] A boy in a blue sweatshirt playing frisbee with two black dogs.  
[H] A boy is playing with a frisbee.

[LABEL] entailment [PRED] entailment [COEFF] 4.7861  
[P] A group of people stand together holding papers and flags.

[H] A group of people holding flags.

[LABEL] entailment [PRED] entailment [COEFF] 4.7379

[P] Some young girls in swimsuits playing volleyball on a sandy field.

[H] Girls are in swimsuits playing volleyball.

[LABEL] entailment [PRED] entailment [COEFF] 4.6275

[P] A clown makes a balloon sculpture for a fan.

[H] A clown makes balloon art.

[LABEL] entailment [PRED] entailment [COEFF] 4.6207

[P] Two people are kissing with old buildings on either side of them and people walking up in the background.

[H] Two people are kissing.

## 1.6 Component 5

[LABEL] entailment [PRED] entailment [COEFF] 9.9801

[P] A man at the subway station waiting for a train.

[H] A man waiting for a train.

[LABEL] entailment [PRED] entailment [COEFF] 8.0916

[P] Picture of a guy at a gas station.

[H] Picture of a guy at a gas station

[LABEL] entailment [PRED] entailment [COEFF] 8.0278

[P] Two men in glasses pose for a picture on a sunny day.

[H] Two men pose for a picture on a sunny day.

[LABEL] entailment [PRED] entailment [COEFF] 7.8973

[P] Three women running on cobblestone.

[H] A group of woman running on cobblestone.

[LABEL] entailment [PRED] entailment [COEFF] 7.8235

[P] A man in a white button up shirt smiling and laughing at the camera.

[H] A man smiles and laughs at the camera.

[LABEL] entailment [PRED] entailment [COEFF] 7.3797

[P] Three men performing on a stage with smoke.

[H] There are three men on a stage in some sort of performance.

[LABEL] entailment [PRED] entailment [COEFF] 7.3387

[P] Two asian woman at an archery competition getting ready to shoot with a crowd watching.

[H] Two women are near a crowd at a competition.

[LABEL] entailment [PRED] entailment [COEFF] 7.2522

[P] Several employees working on an underground rail track.



[H] Employees working on an underground rail track.

[LABEL] entailment [PRED] entailment [COEFF] 7.1512

[P] A hold man in green jacket reads a book along a dirt trail.

[H] A man reads a book along a dirt trail.

[LABEL] entailment [PRED] entailment [COEFF] 7.1270

[P] A middle eastern couple walking down the street.

[H] A couple walk down the street.

[LABEL] entailment [PRED] entailment [COEFF] 7.0075

[P] People walking on a city street and a man holding a yellow flag.

[H] There is a man holding a yellow flag and pedestrians walking on the street.

[LABEL] entailment [PRED] entailment [COEFF] 6.9850

[P] Three people posing in a school room.

[H] People in a school room.

[LABEL] entailment [PRED] entailment [COEFF] 6.9673

[P] A lady sleeps while seated in a yellow chair.

[H] A woman sleeps in a chair

[LABEL] entailment [PRED] entailment [COEFF] 6.9128

[P] Many people are outside of a large building.

[H] A large group of people outside of a building.

[LABEL] entailment [PRED] entailment [COEFF] 6.8291

[P] Five children outside a bungalow looking in different directions.

[H] The group of children outside are looking in different directions.

[LABEL] entailment [PRED] entailment [COEFF] 6.7621

[P] Group sitting on a grassy hill resting.

[H] Some people are sitting down on a grassy hill.

## 1.7 Component 6

[LABEL] entailment [PRED] entailment [COEFF] 10.9586

[P] A woman in a white shirt and pink skirt is about to hit a tennis ball.

[H] A lady prepares to hit a tennis ball.

[LABEL] entailment [PRED] entailment [COEFF] 9.7601

[P] This is a family getting ready for a cookout.

[H] The family prepares for the cookout.

[LABEL] entailment [PRED] entailment [COEFF] 9.4555

[P] A young female swimmer is getting ready to jump off the block.

[H] A woman swimmer is about to jump.

[LABEL] **entailment** [PRED] **entailment** [COEFF] 9.3460

[P] Two firemen getting ready to get onto a firetruck.

[H] Two firemen are about to ride on a firetruck.

[LABEL] **entailment** [PRED] **entailment** [COEFF] 8.9303

[P] Little leaguer getting ready for pitch

[H] A player is about to pitch.

[LABEL] **entailment** [PRED] **entailment** [COEFF] 8.7327

[P] A baseball player in a white uniform with dark stripes is partially on the ground, poised to catch a ball in his left hand as the ball quickly approaches.

[H] A baseball player gets ready to catch a ball.

[LABEL] **entailment** [PRED] **entailment** [COEFF] 8.1857

[P] A toddler in a white sweatshirt is getting ready to grab the pole.

[H] A toddler is ready to grab the pole.

[LABEL] **entailment** [PRED] **entailment** [COEFF] 7.7125

[P] A man is behind a cart trying to sell various food items.

[H] The man is trying to sell some items.

[LABEL] **entailment** [PRED] **entailment** [COEFF] 7.5933

[P] A young girl, wearing her team uniform, is preparing to hit a ball, as another girl watches.

[H] A girl in her uniform is about to hit a ball.

[LABEL] **entailment** [PRED] **entailment** [COEFF] 7.5842

[P] Two soccer players, one wearing a white uniform and the other in red, try to reach the soccer ball first.

[H] Two soccer players are trying to get to the ball first.

[LABEL] **neutral** [PRED] **entailment** [COEFF] 7.5826

[P] A man wearing a blue shirt and a plaid cloth wrapped around his waist is trying to obtain something from a tree by using a long pole.

[H] A man wants to aerate a tree with a long pole.

[LABEL] **entailment** [PRED] **entailment** [COEFF] 7.3947

[P] A guy with long hair, black shirt and white shorts about to play a drum.

[H] A guy is going to play drums.

[LABEL] **entailment** [PRED] **entailment** [COEFF] 6.9183

[P] Two men, one wearing a white shirt and one wearing a navy blue shirt, are about to play soccer.

[H] Two men are about to play soccer.

[LABEL] **entailment** [PRED] **entailment** [COEFF] 6.8954

[P] A few people are walking through the snow to cross a bridge.

[H] People are on their way to cross a bridge.

[LABEL] **entailment** [PRED] **entailment** [COEFF] 6.8318

[P] Tourists pack the square waiting for a show.

[H] People are waiting for a show to start.

[LABEL] **entailment** [PRED] **entailment** [COEFF] 6.6905

[P] The group of people are assembling for a wedding.

[H] People are gathering together for a wedding

## 1.8 Component 7

[LABEL] **contradiction** [PRED] **contradiction** [COEFF] 9.7061

[P] Two dogs are playing on a hardscape.

[H] Two dogs are sleeping inside a house on a bed.

[LABEL] **contradiction** [PRED] **contradiction** [COEFF] 9.3858

[P] A little girl in a yellow shirt runs through a fountain in a busy park

[H] The girl is sleeping in her bed.

[LABEL] **contradiction** [PRED] **contradiction** [COEFF] 8.7822

[P] A man jumping in front of a colorful mural.

[H] The man is sleeping in his bed

[LABEL] **contradiction** [PRED] **contradiction** [COEFF] 8.5685

[P] A medium sized child jumps off of a dusty bank over a creek.

[H] A child is sleeping in his bed.

[LABEL] **contradiction** [PRED] **contradiction** [COEFF] 8.4985

[P] Two children enjoy tubing on the lake.

[H] Two children are sleeping in their beds.

[LABEL] **contradiction** [PRED] **contradiction** [COEFF] 8.4779

[P] Girl child looking through a telescope in a serene setting

[H] A girl sleeping on a couch

[LABEL] **contradiction** [PRED] **contradiction** [COEFF] 8.2931

[P] A kid gets prepared to hit a volleyball.

[H] The child is sleeping on a couch.

[LABEL] **contradiction** [PRED] **contradiction** [COEFF] 8.2514

[P] A woman holding a baby and a man in glasses holding a small boy smile at the camera for their family photo.

[H] The people are sleeping in their bed at home.

[LABEL] **contradiction** [PRED] **contradiction** [COEFF] 8.2355

[P] Two guys, one wearing a white shirt and one wearing a gray shirt, are in the street in front of a white van, one motioning towards the camera while the other claps.

[H] Two men are sleeping together in bed.

[LABEL] **contradiction** [PRED] **contradiction** [COEFF] 8.1617

[P] An adorable little boy in a long - sleeved t - shirt and baseball cap is enjoying playing in some leaves.

[H] The boy is sleeping in bed.

[LABEL] **contradiction** [PRED] **contradiction** [COEFF] 7.5012

[P] A female in a black shirt decided to take a picture of an attraction.

[H] A female is sleeping on the bench.

[LABEL] **contradiction** [PRED] **contradiction** [COEFF] 7.4358

[P] A yellow dog plays with a soccer ball.

[H] A dog sleeping on a couch

[LABEL] **contradiction** [PRED] **contradiction** [COEFF] 7.3495

[P] Little girl eating a sucker between two cars.

[H] A little girl is sleeping in her bed.

[LABEL] **contradiction** [PRED] **contradiction** [COEFF] 7.2807

[P] A jockey rides her pale and mottled horse through some jumps ; one of the obstacles takes the shape of a pair of old - fashioned coke bottles.

[H] A jockey is sleeping in bed.

[LABEL] **contradiction** [PRED] **contradiction** [COEFF] 6.9509

[P] A dog is carrying something pink in its mouth while walking through the snow.

[H] A dog is sleeping in its bed

[LABEL] **contradiction** [PRED] **contradiction** [COEFF] 6.9356

[P] A girl is doing a handstand on a blue balance beam with her legs spread apart and a boardwalk in the distance.

[H] The girl is sleeping in her bed.

## 1.9 Component 8

[LABEL] **contradiction** [PRED] **contradiction** [COEFF] 24.7734

[P] Two climbers attempting to climb a steep, snow - covered peak, nearing the top, where two other climbers await them.

[H] The women are in the club singing

[LABEL] **contradiction** [PRED] **contradiction** [COEFF] 21.3290

[P] Man lays prostrate on the ground on his back possibly in exhaustion.

[H] Three men are playing basketball.

[LABEL] **contradiction** [PRED] **contradiction** [COEFF] 20.5294

[P] Three women are standing in a field with two men in wheelchairs and hats.

[H] A group of men and women are in the office.

[LABEL] **contradiction** [PRED] **contradiction** [COEFF] 19.4801

[P] Man riding a mountain bike doing a jump in the air.

[H] Three women ride scooters in town.

[LABEL] **contradiction** [PRED] **contradiction** [COEFF] 17.6381

[P] Group of kids wearing a blue and gray school uniform while playing.

[H] The men are racing cars.

[LABEL] **contradiction** [PRED] **contradiction** [COEFF] 16.9087

[P] A middle - eastern street vendor sells drinks to some young boys.

[H] Young boys are playing soccer.

[LABEL] **entailment** [PRED] **contradiction** [COEFF] 16.4976

[P] Two small children play after a swim.

[H] Two humans are playing.

[LABEL] **contradiction** [PRED] **contradiction** [COEFF] 16.1135

[P] Two bikers wearing black and red uniforms pedal as they race on the road.

[H] The bikers are indoors.

[LABEL] **entailment** [PRED] **contradiction** [COEFF] 14.9446

[P] Several boys playing flag football in blue and white uniforms

[H] Some humans playing.

[LABEL] **neutral** [PRED] **contradiction** [COEFF] 14.8485

[P] The dogs ran around the dirt racetrack.

[H] Greyhounds are racing at the track.

[LABEL] **neutral** [PRED] **contradiction** [COEFF] 14.6073

[P] Bystanders watch as a female balance - beam gymnast performs.

[H] There are shildren watching

[LABEL] **contradiction** [PRED] **contradiction** [COEFF] 14.4798

[P] Three children play together and act like celebrities with their props.

[H] Three kids are running in the school.

[LABEL] **neutral** [PRED] **contradiction** [COEFF] 14.0813

[P] Twelve members of a baseball team walk across the diamond.

[H] A dozen members of the giants prepare for the game.

[LABEL] **contradiction** [PRED] **contradiction** [COEFF] 14.0711

[P] Four women in bikinis are jumping into a lake together.

[H] Some girls are playing chess.

[LABEL] **neutral** [PRED] **contradiction** [COEFF] 14.0633  
[P] Lone hiker in mountain setting viewing newly tilled land prepared in a " step " system of planting.  
[H] A hiker is walking through china.

[LABEL] **contradiction** [PRED] **contradiction** [COEFF] 13.7971  
[P] Black dog in snow leaps for red object at upper edge of frame.  
[H] A black dog is outside in 100 degree weather.

## 1.10 Component 9

[LABEL] **contradiction** [PRED] **contradiction** [COEFF] 42.9219  
[P] A man in a blue hat standing with a large net in his hand.  
[H] A man is wearing a yellow hat.

[LABEL] **contradiction** [PRED] **contradiction** [COEFF] 36.0975  
[P] A man with a blue shirt on that is with a fishing net.  
[H] The man is wearing a white shirt

[LABEL] **contradiction** [PRED] **contradiction** [COEFF] 33.1444  
[P] A man holds up a blue cloth and smiles.  
[H] The man has a orange cloth.

[LABEL] **contradiction** [PRED] **contradiction** [COEFF] 27.5858  
[P] A man in an orange vest works near a blue - draped fence and black and orange wires.  
[H] The man is wearing a green vest.

[LABEL] **contradiction** [PRED] **contradiction** [COEFF] 26.7690  
[P] Two girls in blue dresses dance.  
[H] Girls in yellow dresses dance.

[LABEL] **contradiction** [PRED] **contradiction** [COEFF] 24.8921  
[P] A boy with a green balloon is standing outside of a large building.  
[H] A boy is holding a yellow balloon outside the house.

[LABEL] **contradiction** [PRED] **contradiction** [COEFF] 22.9875  
[P] A girl wearing a yellow shirt playing with a busted pinata.  
[H] The girl is wearing a green shirt.

[LABEL] **contradiction** [PRED] **contradiction** [COEFF] 22.9063  
[P] A man with a yellow tie looks concerned.  
[H] The man is wearing a green tie.

[LABEL] **contradiction** [PRED] **contradiction** [COEFF] 20.9588  
[P] A young man wearing blue bandanna around his neck is playing the guitar and singing in the microphone.  
[H] A young man wearing a purple bandanna around his neck is playing the flute in front of a microphone.

[LABEL] contradiction [PRED] contradiction [COEFF] 20.8490

[P] Two people, with buildings behind them, are standing near a blue car with two doors open.

[H] The car is orange.

[LABEL] contradiction [PRED] contradiction [COEFF] 20.2915

[P] A woman dressed in blue clasps her hands together.

[H] A woman dressed in gray, folds her arms.

[LABEL] contradiction [PRED] contradiction [COEFF] 19.3914

[P] A man wearing an orange shirt picks up a french fry with chopsticks.

[H] The man is wearing a green shirt.

[LABEL] contradiction [PRED] contradiction [COEFF] 19.3292

[P] A man in yellow rain gear holding a shovel looks on as a man in a green jacket swings a pick at the ground.

[H] A man has white rain gear.

[LABEL] contradiction [PRED] contradiction [COEFF] 18.1421

[P] A figure sets a foot on the ground while perched on a light blue motorbike positioned next to a manhole cover.

[H] The motorbike is yellow.

[LABEL] contradiction [PRED] contradiction [COEFF] 18.1001

[P] A boy wearing a blue shirt is going down a slide.

[H] The boy is wearing a green shirt

[LABEL] contradiction [PRED] contradiction [COEFF] 17.9324

[P] A boy in a blue shirt is jumping backwards over a horizontal pool.

[H] The boy is wearing a green shirt.

## 1.11 Component 10

[LABEL] contradiction [PRED] contradiction [COEFF] 19.8443

[P] A crowded city street.

[H] An empty city street.

[LABEL] contradiction [PRED] contradiction [COEFF] 15.6387

[P] People hard at work inside a large room.

[H] An empty room

[LABEL] contradiction [PRED] contradiction [COEFF] 15.2197

[P] Large packed crowd of hispanic people.

[H] Empty room.

[LABEL] contradiction [PRED] contradiction [COEFF] 14.2209

[P] There are lots of people in the streets.

[H] An empty street.

[LABEL] contradiction [PRED] contradiction [COEFF] 12.6731

[P] Women of different ethnicities stand in a room, holding red and yellow darts.

[H] There is an empty room

[LABEL] contradiction [PRED] contradiction [COEFF] 12.5055

[P] Two fighters facing off in a boxing ring with a crowd watching.

[H] An empty stadium.

[LABEL] contradiction [PRED] contradiction [COEFF] 11.7638

[P] A man in a black shirt walking down a crowded street with a girl in a flower shirt and capri pants following closely behind him.

[H] The streets are empty.

[LABEL] contradiction [PRED] contradiction [COEFF] 11.4435

[P] A man in a black suit with a white bowtie standing in the middle of a crowded room.

[H] A man is standing in an empty room.

[LABEL] contradiction [PRED] contradiction [COEFF] 11.1999

[P] A city street crowded with pedestrians outside a building with illuminated blue words.

[H] An empty street in front of a building with a blue sign.

[LABEL] contradiction [PRED] contradiction [COEFF] 10.8415

[P] A very happy singer in an extravagant outfit.

[H] The singer is dressed in a drab manner.

[LABEL] contradiction [PRED] contradiction [COEFF] 10.1016

[P] The cup is shiny.

[H] The cup is dull.

[LABEL] contradiction [PRED] contradiction [COEFF] 9.7453

[P] People attending an event in a park.

[H] An empty park.

[LABEL] contradiction [PRED] contradiction [COEFF] 9.6411

[P] A woman jogging across an intersection.

[H] A woman is jogging in an empty field.

[LABEL] contradiction [PRED] contradiction [COEFF] 9.2949

[P] People in the middle of city street surrounded by large buildings.

[H] A person stands in the middle of an empty street.

[LABEL] contradiction [PRED] contradiction [COEFF] 8.8714

[P] Three individuals are conversing.

[H] Three people are silent.



[LABEL] contradiction [PRED] contradiction [COEFF] 8.6708

[P] A man with a white shirt is sitting at a table in a room with other people and posters along the blue wall.

[H] An empty room with bare walls.

## 1.12 Component 11

[LABEL] contradiction [PRED] contradiction [COEFF] 8.3646

[P] A crowded community marketplace where many people are buying and selling products.

[H] Many people are in a church during a funeral service.

[LABEL] contradiction [PRED] contradiction [COEFF] 7.5275

[P] People waiting in line for their favorite beverage.

[H] The people are in line for a roller coaster.

[LABEL] contradiction [PRED] contradiction [COEFF] 7.4540

[P] A group of musicians inside of a living room with white walls and brown rugs playing their music.

[H] A group of rugby players are in a living room.

[LABEL] contradiction [PRED] contradiction [COEFF] 7.3214

[P] Two young children look at some type of food.

[H] The children are looking at a dog running outside.

[LABEL] contradiction [PRED] contradiction [COEFF] 7.2717

[P] Musicians are playing their instruments for a crowd of onlookers.

[H] The people are playing tennis.

[LABEL] neutral [PRED] contradiction [COEFF] 6.9362

[P] A man is bent over in a retail store looking at merchandise.

[H] The man is looking at a ring.

[LABEL] contradiction [PRED] contradiction [COEFF] 6.8035

[P] This is a bunch of people attending some sort of festival involving food.

[H] A bunch of people sitting in a restaurant.

[LABEL] contradiction [PRED] contradiction [COEFF] 6.7996

[P] A man is selling snacks at a sporting event.

[H] A man is selling hats at the boxing match.

[LABEL] contradiction [PRED] contradiction [COEFF] 6.5220

[P] A child wearing a costume rides a bike in winter.

[H] A child is sitting on the ground.

[LABEL] contradiction [PRED] contradiction [COEFF] 6.4023

[P] A foreign woman looks at ancient artifacts.

[H] A woman is looking at sheets in a store.

[LABEL] **contradiction** [PRED] **contradiction** [COEFF] 6.2852  
[P] A party or reunion at someones house and the people are talking.  
[H] The people are bowling.

[LABEL] **contradiction** [PRED] **contradiction** [COEFF] 6.2790  
[P] Side view of a cyclist in racing outfit on a country road.  
[H] The cyclist is is wearing his roller skating clothes.

[LABEL] **contradiction** [PRED] **contradiction** [COEFF] 6.0518  
[P] A person standing on stilts is bending over.  
[H] A cow is standing in a field.

[LABEL] **contradiction** [PRED] **contradiction** [COEFF] 6.0013  
[P] Lady buying groceries from a 3rd party person.  
[H] A person buying a car.

[LABEL] **contradiction** [PRED] **contradiction** [COEFF] 5.9558  
[P] A group of people gather and holding different types of flags.  
[H] A group of people running in a marathon.

[LABEL] **contradiction** [PRED] **contradiction** [COEFF] 5.8005  
[P] A couple women perform in the street for a crowd of people.  
[H] A couple women are sitting in a cafe

### 1.13 Component 12

[LABEL] **contradiction** [PRED] **contradiction** [COEFF] 25.3983  
[P] A woman wearing white outfit and white sneaker playing tennis  
[H] A woman is playing basketball

[LABEL] **contradiction** [PRED] **contradiction** [COEFF] 25.2162  
[P] An inter racial group of kids playing soccer in a suburban neighborhood.  
[H] The kids are playing basketball in their neighborhood.

[LABEL] **contradiction** [PRED] **contradiction** [COEFF] 24.0145  
[P] Three boys play football in the grass.  
[H] The three boys are playing basketball.

[LABEL] **contradiction** [PRED] **contradiction** [COEFF] 23.0624  
[P] A young boy wearing baseball clothing getting ready to pitch a ball.  
[H] The boy is playing basketball.

[LABEL] **contradiction** [PRED] **contradiction** [COEFF] 22.8434  
[P] The girl in blue kicks the soccer ball.  
[H] The child is playing basketball.

[LABEL] contradiction [PRED] contradiction [COEFF] 21.0284

[P] Two boys run after a soccer ball on a field.

[H] The two boys are playing basketball.

[LABEL] contradiction [PRED] contradiction [COEFF] 20.5104

[P] Five men are playing soccer.

[H] The men are playing basketball.

[LABEL] contradiction [PRED] contradiction [COEFF] 20.4256

[P] Seven people playing soccer on a field.

[H] The seven people are playing basketball.

[LABEL] contradiction [PRED] contradiction [COEFF] 18.8391

[P] People wearing blue jerseys and gold pants play football.

[H] People are playing baseball.

[LABEL] contradiction [PRED] contradiction [COEFF] 18.7253

[P] A man in red and black is hitting a soccer ball with his head.

[H] The man was playing basketball with his friends.

[LABEL] contradiction [PRED] contradiction [COEFF] 18.5205

[P] Two soccer teams playing a game.

[H] There is a group of people playing basketball.

[LABEL] contradiction [PRED] contradiction [COEFF] 18.3578

[P] A woman looking down while holding a tennis racket.

[H] A woman is playing baseball

[LABEL] contradiction [PRED] contradiction [COEFF] 18.0593

[P] Several people are playing baseball on a grassy lawn, with a government building in the background.

[H] The people are playing soccer.

[LABEL] contradiction [PRED] contradiction [COEFF] 16.5539

[P] A man playing basketball in a beautiful day.

[H] A man playing soccer on a beautiful day.

[LABEL] contradiction [PRED] contradiction [COEFF] 16.2197

[P] A person in a white shirt and black shorts is getting ready to serve a volleyball.

[H] A person is playing soccer.

[LABEL] contradiction [PRED] contradiction [COEFF] 15.8573

[P] Two competing soccer teams are competing.

[H] The teams are playing basketball.

## 1.14 Component 13

[LABEL] **contradiction** [PRED] **contradiction** [COEFF] 18.3802

[P] The woman in a red jacket is smiling at the camera.

[H] The woman was frowning at the camera.

[LABEL] **contradiction** [PRED] **contradiction** [COEFF] 18.3153

[P] Two woman in dresses smile at a camera while walking.

[H] The two women are frowning at the camera.

[LABEL] **contradiction** [PRED] **contradiction** [COEFF] 14.4193

[P] A happy mother at her baby shower is excited that her friend gave her baby a spiderman t - shirt.

[H] A mother is upset that her friend gave her a gift.

[LABEL] **contradiction** [PRED] **contradiction** [COEFF] 14.4096

[P] A girl wearing a tan shirt and blue shorts smiles while painting.

[H] A girl with a blue shirt frowns while doing the dishes.

[LABEL] **contradiction** [PRED] **contradiction** [COEFF] 14.3743

[P] A man is happily giving out announcements.

[H] A man is upset because his business just closed.

[LABEL] **contradiction** [PRED] **contradiction** [COEFF] 13.9637

[P] Two woman in dresses smiling at the camera.

[H] The woman are glaring.

[LABEL] **contradiction** [PRED] **contradiction** [COEFF] 13.8245

[P] A postal worker smiles, with a brick street background.

[H] A postal worker frowns on the street.

[LABEL] **contradiction** [PRED] **contradiction** [COEFF] 13.6815

[P] Two young children are hugging.

[H] The two children are fighting.

[LABEL] **contradiction** [PRED] **contradiction** [COEFF] 13.2766

[P] A woman in pajamas and a man smiling in a hallway.

[H] A man is angry in the hallway.

[LABEL] **contradiction** [PRED] **contradiction** [COEFF] 13.1955

[P] A boy and a girl laughing and having a good time.

[H] There is a group of people fighting.

[LABEL] **contradiction** [PRED] **contradiction** [COEFF] 13.1515

[P] The couple embrace on the street.

[H] The couple is fighting.

[LABEL] **contradiction** [PRED] **contradiction** [COEFF] 11.8737

[P] A couple dancing at the prom.

[H] A couple fighting after the prom.

[LABEL] **contradiction** [PRED] **contradiction** [COEFF] 11.5008

[P] A man in a white button up shirt smiling and laughing at the camera.

[H] A man is scowling.

[LABEL] **contradiction** [PRED] **contradiction** [COEFF] 10.9923

[P] People having fun at a barbecue party.

[H] People fighting at a buffet.

[LABEL] **contradiction** [PRED] **contradiction** [COEFF] 10.9215

[P] The girl in the blue dress and hat is smiling.

[H] A girl is dressed in rags and is unhappy.

[LABEL] **contradiction** [PRED] **contradiction** [COEFF] 10.6503

[P] A celebration in the street with people dancing and playing music.

[H] The people are fighting in the street.

## 1.15 Component 14

[LABEL] **entailment** [PRED] **entailment** [COEFF] 23.5678

[P] Three people on bikes racing through the orange cones.

[H] Three people are on bikes

[LABEL] **entailment** [PRED] **entailment** [COEFF] 22.6184

[P] Three women dressed up, smiling and walking in the wind.

[H] Three women dressed up

[LABEL] **neutral** [PRED] **entailment** [COEFF] 19.5774

[P] Three female swimmers in swim caps and goggles are lined up in a pool with their arms outstretched.

[H] Three females swimming

[LABEL] **entailment** [PRED] **entailment** [COEFF] 17.8533

[P] Three people working on the ground work.

[H] Three people are working.

[LABEL] **entailment** [PRED] **entailment** [COEFF] 16.9728

[P] Three people wearing reflective clothing are working on the street.

[H] Three people are working.

[LABEL] **entailment** [PRED] **entailment** [COEFF] 16.3287

[P] Three men fishing with string.

[H] Three men fishing.

[LABEL] **entailment** [PRED] **entailment** [COEFF] 15.9501

[P] Three men loading a truck piled with hogs in cages.

[H] Three men are loading up a truck.

[LABEL] entailment [PRED] entailment [COEFF] 15.4216

[P] Three people in various jackets and shoulder bags work to lift up the security shutter on a storefront.

[H] Three people work to lift up something

[LABEL] entailment [PRED] entailment [COEFF] 15.2110

[P] Four people walk on a bridge over a body of water.

[H] Four people walk on bridge

[LABEL] entailment [PRED] entailment [COEFF] 14.9693

[P] Three children playing in large bubble balls inside a pool.

[H] Three children are playing.

[LABEL] entailment [PRED] entailment [COEFF] 14.7654

[P] Three black males on surfboards in clear, blue water and while one is on a wave, the other two are paddling.

[H] Three men are on surfboards.

[LABEL] entailment [PRED] entailment [COEFF] 14.6561

[P] Three young women in a city crowd are standing together and two of them are in the middle of high - fives with one another.

[H] Three women stand together.

[LABEL] entailment [PRED] entailment [COEFF] 14.6114

[P] Three boaters paddle their produce to the market in a vietnamese fishing village.

[H] Three people in boat

[LABEL] entailment [PRED] entailment [COEFF] 14.4965

[P] Three men, one in a red and white shirt, are sitting together.

[H] Three men are sitting together.

[LABEL] entailment [PRED] entailment [COEFF] 14.2632

[P] Three people wear a lot of makeup and stand together.

[H] Three people wearing makeup stand together

[LABEL] entailment [PRED] entailment [COEFF] 14.2536

[P] Three young girls pose together outside.

[H] Three girls outside.

## 1.16 Component 15

[LABEL] entailment [PRED] contradiction [COEFF] 82.2371

[P] A man is kneeling down with a child on a beach where bright blue and red boats are stationed in the background.

[H] A man and boy are outside.

[LABEL] entailment [PRED] contradiction [COEFF] 81.0159  
 [P] A girl wearing a blue top sitting on rocks by the water.  
 [H] A girl is outside.

[LABEL] entailment [PRED] contradiction [COEFF] 80.9479  
 [P] A large dog sits in the grass.  
 [H] A dog is outside.

[LABEL] entailment [PRED] entailment [COEFF] 79.5487  
 [P] Some people are standing alone on the beach in their swimsuits.  
 [H] People are outside.

[LABEL] entailment [PRED] contradiction [COEFF] 76.6787  
 [P] A girl sits on a ledge by the beach, rainbow flags on poles fly in the background.  
 [H] A girl is outside.

[LABEL] entailment [PRED] entailment [COEFF] 72.9274  
 [P] Two people in shorts are running on the beach.  
 [H] Two people are outside.

[LABEL] entailment [PRED] entailment [COEFF] 72.4007  
 [P] A small girl in a dress blows bubbles in a grassy field.  
 [H] A girl is outside.

[LABEL] entailment [PRED] entailment [COEFF] 70.0892  
 [P] Little girl is spinning around on the grass in a flowing purple skirt.  
 [H] A little girl is outside.

[LABEL] entailment [PRED] contradiction [COEFF] 69.6501  
 [P] Young boy in blue shorts at the beach.  
 [H] The young boy is outside.

[LABEL] entailment [PRED] contradiction [COEFF] 68.8496  
 [P] A woman is standing in the ocean as a wave comes towards her.  
 [H] A woman is outside.

[LABEL] entailment [PRED] entailment [COEFF] 68.7977  
 [P] A woman in black clothes is sitting on a rock at the bottom of a waterfall.  
 [H] A woman is outside.

[LABEL] entailment [PRED] contradiction [COEFF] 67.6422  
 [P] People sit along the edge of the water relaxing.  
 [H] People are outside.

[LABEL] entailment [PRED] contradiction [COEFF] 65.9663  
 [P] A person wearing a striped shirt relaxes in the grass under a blossom filled tree.

[H] A person is outside.

[LABEL] **entailment** [PRED] **contradiction** [COEFF] 65.4937

[P] A woman has just hit a volleyball on a beach.

[H] The woman is outside.

[LABEL] **entailment** [PRED] **entailment** [COEFF] 62.3574

[P] A group of people meditating on the beach.

[H] A group of people outside.

[LABEL] **entailment** [PRED] **contradiction** [COEFF] 61.4857

[P] A dog swims in a pool.

[H] A dog is outside.

## 1.17 Component 16

[LABEL] **contradiction** [PRED] **contradiction** [COEFF] 2.7013

[P] A woman on a horse wrangling a cow in a pen.

[H] A man competes in a bull - riding competition.

[LABEL] **contradiction** [PRED] **contradiction** [COEFF] 2.6940

[P] A girl is adding a vial of blue liquid to a glass container, while another girl looks on.

[H] A boy boils a pot of water.

[LABEL] **contradiction** [PRED] **contradiction** [COEFF] 2.6693

[P] A woman on a lounge chair is lying on the beach.

[H] A man tanning at a salon.

[LABEL] **contradiction** [PRED] **contradiction** [COEFF] 2.6460

[P] Woman inside of a food truck smiles out of the window.

[H] A man in a car

[LABEL] **contradiction** [PRED] **contradiction** [COEFF] 2.6293

[P] A radio hanging from the ceiling.

[H] A stuffed animal sitting on a desk.

[LABEL] **contradiction** [PRED] **contradiction** [COEFF] 2.6266

[P] Four men pose in front of a dry - docked boat ; three of them are sitting with a pair of drums.

[H] A cow tugging at field grass.

[LABEL] **contradiction** [PRED] **contradiction** [COEFF] 2.5820

[P] A woman wearing a beige purse is crossing the street at a crosswalk with a spring sign behind her.

[H] A man wearing a dress is crossing the street.

[LABEL] **contradiction** [PRED] **contradiction** [COEFF] 2.5672

[P] An old customer waits for his food from a vendor.



[H] A young boy waits for a book from a librarian.

[LABEL] **contradiction** [PRED] **contradiction** [COEFF] 2.5633

[P] A boy and a girl laughing and having a good time.

[H] There is a group of people fighting.

[LABEL] **contradiction** [PRED] **contradiction** [COEFF] 2.5495

[P] A black boy dressed in black shorts and shirt kicks a soccer ball on sand, while others watch.

[H] A young girl skips rope while others watch.

[LABEL] **contradiction** [PRED] **contradiction** [COEFF] 2.5350

[P] A young girl with a bright blue shirt is eating food off of a countertop.

[H] A boy goes shopping.

[LABEL] **contradiction** [PRED] **contradiction** [COEFF] 2.4908

[P] A woman riding a bicycle next to a field.

[H] There is a man riding a bicycle.

[LABEL] **contradiction** [PRED] **contradiction** [COEFF] 2.4825

[P] A young male figure plays guitar in front of a drummer, while an audience crowds nearby.

[H] A woman playing cards

[LABEL] **contradiction** [PRED] **contradiction** [COEFF] 2.4820

[P] A man plays ball with a little boy.

[H] A woman shaving her head

[LABEL] **contradiction** [PRED] **contradiction** [COEFF] 2.4813

[P] A young woman on the street stands for a photo.

[H] A man is talking to a pidgeon.

[LABEL] **contradiction** [PRED] **contradiction** [COEFF] 2.4721

[P] A woman is jumping really high while in the middle of a ruins area, with beautiful mountaintops in the distance.

[H] A man juggling bottles.

## 1.18 Component 17

[LABEL] **entailment** [PRED] **entailment** [COEFF] 7.6072

[P] Gross couple kissing outdoors.

[H] A couple is kissing.

[LABEL] **entailment** [PRED] **entailment** [COEFF] 7.3462

[P] Two people sitting beside a few small boats.

[H] A couple is sitting.

[LABEL] **entailment** [PRED] **entailment** [COEFF] 7.1038

[P] A bricklayer smoothing out concrete.  
[H] Someone is smoothing concrete.

[LABEL] entailment [PRED] entailment [COEFF] 6.6635  
[P] Laborers baling hay in a field.  
[H] People are working with hay.

[LABEL] entailment [PRED] entailment [COEFF] 6.1639  
[P] Man in white facing body of water.  
[H] A man is near water

[LABEL] entailment [PRED] entailment [COEFF] 5.9790  
[P] A red cone on the side of a street.  
[H] An object is near an edge.

[LABEL] entailment [PRED] entailment [COEFF] 5.4224  
[P] A woman examining samples under a microscope.  
[H] There is a person with scientific equipment.

[LABEL] entailment [PRED] entailment [COEFF] 5.1536  
[P] Man jumping off rocks.  
[H] A man jumps.

[LABEL] entailment [PRED] entailment [COEFF] 5.0541  
[P] Tennis player trying to reach the ball.  
[H] A person is playing tennis.

[LABEL] entailment [PRED] entailment [COEFF] 5.0396  
[P] Two young children playing outside.  
[H] Two children are outside.

[LABEL] entailment [PRED] entailment [COEFF] 5.0216  
[P] Young boy running outside on the pavement.  
[H] A boy runs on the pavement.

[LABEL] entailment [PRED] entailment [COEFF] 4.9115  
[P] A man cooking sausage and bacon over an open fire.  
[H] A person is making food.

[LABEL] entailment [PRED] entailment [COEFF] 4.9094  
[P] A woman cutting a brown cake.  
[H] A lady is near a cake.

[LABEL] entailment [PRED] entailment [COEFF] 4.8891  
[P] A man and a woman dance happily.  
[H] A couple are dancing.

[LABEL] entailment [PRED] entailment [COEFF] 4.6897

[P] Two young children petting a brown cow.

[H] Two people are petting an animal.

[LABEL] entailment [PRED] entailment [COEFF] 4.5292

[P] Superhero man leaping in a plaza

[H] A superhero is jumping into the air.

## 1.19 Component 18

[LABEL] neutral [PRED] neutral [COEFF] 52.0770

[P] A man shovels snow in front of a house.

[H] The man is wearing a coat.

[LABEL] neutral [PRED] neutral [COEFF] 51.2358

[P] A boy kicks through a pile of leaves.

[H] Boy is wearing a thick jacket.

[LABEL] neutral [PRED] contradiction [COEFF] 48.8302

[P] A woman is watching a black dog.

[H] The woman is wearing a hat

[LABEL] neutral [PRED] neutral [COEFF] 46.9470

[P] A man being bucked off a bronco at a rodeo.

[H] The man is wearing a cowboy hat.

[LABEL] neutral [PRED] neutral [COEFF] 45.6930

[P] Eight people are attempting to pull a tractor with a rope

[H] The people are wearing gloves.

[LABEL] neutral [PRED] contradiction [COEFF] 45.4252

[P] A man with a jackhammer demolishing cement

[H] The man is wearing a vest

[LABEL] contradiction [PRED] neutral [COEFF] 43.0542

[P] A boy in the snow riding his bike down the street.

[H] The boy is wearing a t - shirt because it's over 30c outside.

[LABEL] contradiction [PRED] neutral [COEFF] 43.0535

[P] A man with glasses dressed up as a zombie.

[H] The man is wearing a blue shirt.

[LABEL] neutral [PRED] neutral [COEFF] 41.9497

[P] Two men painting a support wall.

[H] The men are wearing coveralls.

[LABEL] **neutral** [PRED] **neutral** [COEFF] 41.3740

[P] A young boy playing in a pool.

[H] The boy is wearing a life jacket.

[LABEL] **neutral** [PRED] **neutral** [COEFF] 41.2612

[P] A little boy jumping while holding a lady hand.

[H] The boy is wearing a striped shirt.

[LABEL] **neutral** [PRED] **neutral** [COEFF] 40.9102

[P] A woman is bending over assisting a small child on the ground.

[H] The woman is wearing a skirt.

[LABEL] **neutral** [PRED] **neutral** [COEFF] 40.3875

[P] A mother and her child attending a concert.

[H] The mother is wearing a skirt.

[LABEL] **contradiction** [PRED] **neutral** [COEFF] 40.0110

[P] A window washer is cleaning the bookstore windows.

[H] A window washer is wearing a designer suit.

[LABEL] **neutral** [PRED] **neutral** [COEFF] 38.9781

[P] A group of people walking through a park with signs.

[H] The group of people are all wearing white hats.

[LABEL] **neutral** [PRED] **neutral** [COEFF] 38.8230

[P] An elderly man selling vegetables from the back of his vehicle.

[H] The man is wearing a white hat.

## 1.20 Component 19

[LABEL] **entailment** [PRED] **entailment** [COEFF] 14.1689

[P] One woman looks at a camera while another reaches toward her.

[H] Two women are near each other.

[LABEL] **entailment** [PRED] **entailment** [COEFF] 13.0794

[P] A blond girl wearing flannel and a brunette wearing a red shirt, both in jeans, are sitting in a tree with a crowd in the background.

[H] A young girl is wearing clothes.

[LABEL] **entailment** [PRED] **entailment** [COEFF] 12.5069

[P] A young woman sits on a bench peeling shrimp over her plate while the boy sitting next to her takes a break from his meal.

[H] Two people sit together on a bench with their food.

[LABEL] **neutral** [PRED] **entailment** [COEFF] 12.0359

[P] Two older women, one on a bicycle talking in front of a sign in a city with an older gentleman looking

on.

[H] A group of older people touring the city.

[LABEL] **neutral** [PRED] **entailment** [COEFF] 11.4033

[P] Three women leave ikea with goods on carts.

[H] A group of women visit ikea

[LABEL] **neutral** [PRED] **entailment** [COEFF] 11.1479

[P] A baby sits in a smiling woman's lap.

[H] A mother and child sitting together.

[LABEL] **entailment** [PRED] **entailment** [COEFF] 10.9931

[P] One man is holding a dumpster door open while another man puts a trash bag in the dumpster.

[H] Two men are taking out the trash.

[LABEL] **entailment** [PRED] **entailment** [COEFF] 10.9474

[P] A man is flipping another person while the other guy is trying to lift the other person.

[H] Two men are lifting people.

[LABEL] **entailment** [PRED] **entailment** [COEFF] 10.9196

[P] A dog running on the sand by the beach while his owner looks at the other dogs on the beach.

[H] A dog and person are at the beach along with other dogs.

[LABEL] **entailment** [PRED] **entailment** [COEFF] 10.6869

[P] A woman and a child in front of a christmas tree opening presents.

[H] Two people are looking at gifts.

[LABEL] **entailment** [PRED] **entailment** [COEFF] 10.5798

[P] A man holds an orange juice carton on a grocery store shelf while a woman looks further down on the shelf.

[H] Two people are in the grocery store.

[LABEL] **neutral** [PRED] **entailment** [COEFF] 10.5738

[P] A brunette female standing by a cafe smoking a cigarette while two people are having a beverage.

[H] A dark - haired girl is hanging out near a little shop.

[LABEL] **entailment** [PRED] **entailment** [COEFF] 10.1745

[P] One child reaches up for something while another stands beside him.

[H] There are two children standing.

[LABEL] **entailment** [PRED] **entailment** [COEFF] 10.1445

[P] Here is a picture of a man kissing his wife at a park and his wife is taking a picture of them kissing.

[H] A woman photographs herself and her husband kissing.

[LABEL] **neutral** [PRED] **entailment** [COEFF] 10.1167

[P] A person sits on a red bench to eat while another watches.

[H] Two people sitting and taking

[LABEL] entailment [PRED] entailment [COEFF] 10.1082

[P] Fat man and dog are sitting in front of a statue.

[H] There is an animal and a human sitting near a statue.

## 1.21 Component 20

[LABEL] entailment [PRED] entailment [COEFF] 10.6109

[P] A group of smiling people are sitting around a table in an amber lit room holding drinks in their hands.

[H] A group is gathered together enjoying drinks.

[LABEL] neutral [PRED] entailment [COEFF] 8.4841

[P] A man in a suit, sitting behind a desk covered with radio paraphernalia, speaks into a microphone.

[H] A man is using radio equipment to communicate.

[LABEL] entailment [PRED] entailment [COEFF] 7.0282

[P] A black man sits intently at his sewing machine surrounded by brightly colored fabrics hung on the outside window of a stucco building.

[H] A man works on a sewing project outside a stucco building covered in his fabric selections.

[LABEL] entailment [PRED] entailment [COEFF] 6.7329

[P] Several people walking in a line across a distant bridge

[H] There were many people walking across the bridge.

[LABEL] neutral [PRED] entailment [COEFF] 6.6681

[P] A man playing a banjo during street fair, catching the attention of people walking past.

[H] A man is playing for a street audience.

[LABEL] entailment [PRED] entailment [COEFF] 6.6276

[P] A group of people sitting around a fire watching a folk band play music under an awning.

[H] Folk musicians perform for a crowd under an awning.

[LABEL] entailment [PRED] entailment [COEFF] 6.5821

[P] A beach scene with three boys in swim shorts each holding paddle ball racquets but no ball in sight.

[H] Three boys in swimming gear about to play paddle ball.

[LABEL] entailment [PRED] entailment [COEFF] 6.5379

[P] A man in a black and white suit is juggling rings in the street while spectators are cheering him on.

[H] A man is putting on a show.

[LABEL] entailment [PRED] entailment [COEFF] 6.5347

[P] Toddler sitting in a swing at the park with a yellow sippy cup.

[H] A toddler is enjoying the park and holding a sippy cup.

[LABEL] entailment [PRED] entailment [COEFF] 6.3406

[P] A one man band with a red umbrella stops in front of a woman with a child in a stroller.

[H] A person playing music for a woman and child.

[LABEL] **entailment** [PRED] **entailment** [COEFF] 6.2806

[P] A man in black approaches a strange silver object containing a person, while many onlookers observe from behind a roped off barrier.

[H] People are watching the man in black.

[LABEL] **neutral** [PRED] **entailment** [COEFF] 6.2652

[P] A scottish bagpipe group is standing in a circle in their attire.

[H] There is a group of bagpipers performing.

[LABEL] **entailment** [PRED] **entailment** [COEFF] 6.0721

[P] A young man is standing in the kitchen holding a large casserole dish.

[H] A man is standing with food.

[LABEL] **entailment** [PRED] **entailment** [COEFF] 5.9637

[P] Five adults and a child are laughing and smiling as they visit in a home of a relative or friend.

[H] A group of people are having a good time together in a house.

[LABEL] **entailment** [PRED] **entailment** [COEFF] 5.9225

[P] A man in a black shirt looks on with a grin while standing in front of two trays holding glasses with a yellow liquid.

[H] A man smiles as he looks at drinks.

[LABEL] **neutral** [PRED] **entailment** [COEFF] 5.7241

[P] A man with a dark green apron standing with his hands on his waist with a grill in the background.

[H] A man has been cooking.

## 1.22 Component 21

[LABEL] **contradiction** [PRED] **contradiction** [COEFF] 15.1192

[P] A man with a hat and long gray beard, wearing cross, is holding a napkin and striped box.

[H] The man is clean shaven.

[LABEL] **contradiction** [PRED] **contradiction** [COEFF] 14.1355

[P] A baby with food smeared on its face and two fingers up its nose.

[H] The babies face is totally clean.

[LABEL] **contradiction** [PRED] **contradiction** [COEFF] 11.4546

[P] A little kid with food all over her face in a highchair.

[H] The little boy is clean.

[LABEL] **contradiction** [PRED] **contradiction** [COEFF] 11.4530

[P] A young lady wearing blue and black is running past an orange cone.

[H] The young lady is walking calmly.

[LABEL] contradiction [PRED] contradiction [COEFF] 10.0778

[P] A bike rider with khaki green shorts, a blue shirt, backpack and helmet is riding on the street near a red station wagon that is missing a hubcap on the back drivers side.

[H] A red station wagon is in perfect condition.

[LABEL] contradiction [PRED] contradiction [COEFF] 9.7636

[P] Snow is dusted on the young boy's clothing making it appear that he has fallen several times.

[H] The boy's clothing is clean, tidy, and dry.

[LABEL] contradiction [PRED] contradiction [COEFF] 9.0394

[P] A man sitting with his shoes off in an alley

[H] Everyone is upright.

[LABEL] contradiction [PRED] contradiction [COEFF] 8.9419

[P] A man wearing blue jeans is laying down with his head on his bookbag.

[H] Everyone is sitting upright.

[LABEL] contradiction [PRED] contradiction [COEFF] 8.9089

[P] A girl with blue hair is pushing a coffee cart.

[H] The girl is sound asleep.

[LABEL] entailment [PRED] contradiction [COEFF] 8.8297

[P] A man in a red jacket and khaki pants is walking through a part of what looks like arizona.

[H] The man is fully clothed

[LABEL] contradiction [PRED] contradiction [COEFF] 8.7685

[P] A local house party with alcoholic drinks involved.

[H] The people are having a quiet and sober night at home.

[LABEL] contradiction [PRED] contradiction [COEFF] 8.2770

[P] A boy wearing blue shorts is doing a back flip in the air under a tree.

[H] A boy is standing still

[LABEL] contradiction [PRED] contradiction [COEFF] 7.7380

[P] A group of people appear to be shouting or protesting.

[H] The people are very calm.

[LABEL] contradiction [PRED] contradiction [COEFF] 7.7248

[P] Collie jumping over a training hurdle that is on the grass.

[H] The collie is fast asleep on the grass

[LABEL] contradiction [PRED] contradiction [COEFF] 7.6941

[P] A man is waist deep in a river casting a net.

[H] The man is 100 % dry.

[LABEL] contradiction [PRED] contradiction [COEFF] 7.5897



[P] A group of young men are playing around a natural waterfall.  
[H] Everything is dry.

## 1.23 Component 22

[LABEL] **contradiction** [PRED] **contradiction** [COEFF] 15.3337

[P] Two kids sit in the middle of a playground toy that spins around them.

[H] Nobody is sitting.

[LABEL] **contradiction** [PRED] **contradiction** [COEFF] 15.2756

[P] Two people are eating in a room.

[H] Nobody eating.

[LABEL] **contradiction** [PRED] **contradiction** [COEFF] 14.8361

[P] Parents with young children sitting at a picnic table.

[H] Nobody is sitting.

[LABEL] **contradiction** [PRED] **contradiction** [COEFF] 13.3776

[P] The girls are playing soccer.

[H] Nobody is playing.

[LABEL] **contradiction** [PRED] **contradiction** [COEFF] 12.9200

[P] Two santa dancing on concrete.

[H] Nobody is dancing.

[LABEL] **contradiction** [PRED] **contradiction** [COEFF] 12.4307

[P] A young female child looks at the photographer while an older woman sits and looks at the ground.

[H] Nobody is looking at the ground.

[LABEL] **contradiction** [PRED] **contradiction** [COEFF] 12.1265

[P] Two men looking at bags filled with fish.

[H] Nobody is looking

[LABEL] **contradiction** [PRED] **contradiction** [COEFF] 11.1139

[P] A little boy playing in a dogs bowl while the dog looks on.

[H] Nobody is playing.

[LABEL] **contradiction** [PRED] **contradiction** [COEFF] 10.6453

[P] Some girls are outside an airport with their bags waiting, while a woman on the right side is smoking.

[H] Nobody is smoking.

[LABEL] **contradiction** [PRED] **contradiction** [COEFF] 10.2624

[P] Two children are playing on a bicycle.

[H] There are no children.

[LABEL] **contradiction** [PRED] **contradiction** [COEFF] 10.1851

[P] A male and a female sitting in a living room playing jenga.  
[H] Nobody is sitting.

[LABEL] **contradiction** [PRED] **contradiction** [COEFF] 9.7238

[P] Two people sit on a bench in front of a picture of a woman with long, messy hair and a huge diamond necklace.  
[H] Nobody is sitting.

[LABEL] **contradiction** [PRED] **contradiction** [COEFF] 9.2654

[P] A woman speaks as two men on the panel for the institute for politics, democracy, and the internet listen.  
[H] Nobody is speaking

[LABEL] **contradiction** [PRED] **contradiction** [COEFF] 9.2504

[P] A man takes a picture out a window.  
[H] Nobody is taking a picture.

[LABEL] **contradiction** [PRED] **contradiction** [COEFF] 9.2027

[P] A man and a woman are standing next to sculptures, talking while another man looks at other sculptures.  
[H] Nobody is standing.

[LABEL] **contradiction** [PRED] **contradiction** [COEFF] 9.0083

[P] A toddler and a baby play at the end of a slide.  
[H] Nobody is playing.

## 1.24 Component 23

[LABEL] **contradiction** [PRED] **contradiction** [COEFF] 5.5775

[P] An older man sitting outside reading a book.  
[H] The man is playing with a dog at the park.

[LABEL] **contradiction** [PRED] **contradiction** [COEFF] 5.2990

[P] A woman and child are sitting in a chair.  
[H] A woman and child play on a blanket at a park.

[LABEL] **contradiction** [PRED] **contradiction** [COEFF] 4.4122

[P] A boy in a swimsuit jumping into water.  
[H] A boy is eating ice cream at the pool.

[LABEL] **contradiction** [PRED] **contradiction** [COEFF] 4.4041

[P] A woman sits on a train and reads intently.  
[H] A woman walking to her plane.

[LABEL] **contradiction** [PRED] **contradiction** [COEFF] 4.3509

[P] A girl who is surrounded by other people is taking a picture at a concert.  
[H] A girl is sitting down reading a book next to a lake

[LABEL] contradiction [PRED] contradiction [COEFF] 4.3327  
[P] Man with gray hair telling a story to a group of younger people on a bench.  
[H] A man is walking through a park.

[LABEL] contradiction [PRED] contradiction [COEFF] 4.2565  
[P] A gathering of people who are eating.  
[H] People are swimming in the ocean.

[LABEL] contradiction [PRED] contradiction [COEFF] 4.2287  
[P] A girl wearing pink swings on a swing.  
[H] A girl is digging in the sandbox while her mother watches.

[LABEL] contradiction [PRED] contradiction [COEFF] 4.1941  
[P] Terrier dog playing with toy on blanket  
[H] The terrier dog is jumping into the wading pool.

[LABEL] contradiction [PRED] contradiction [COEFF] 4.1037  
[P] A boy is sitting at a table writing in his notebook.  
[H] A boy is playing outside.

[LABEL] contradiction [PRED] contradiction [COEFF] 4.0991  
[P] A woman lying down on a skateboard knocks down some rainbow colored bowling pins.  
[H] A pretty woman walks the runway at a fashion show.

[LABEL] contradiction [PRED] contradiction [COEFF] 4.0926  
[P] A man riding his bike with crowd in background.  
[H] A man is sitting on a bench eating ice cream.

[LABEL] contradiction [PRED] contradiction [COEFF] 4.0519  
[P] A person in a green shirt is looking up at the sky using a telescope.  
[H] A person is kicking a ball

[LABEL] contradiction [PRED] contradiction [COEFF] 3.8999  
[P] A man in a blue collared shirt plays an instrument and sings.  
[H] A man is wearing pajamas and sleeping.

[LABEL] contradiction [PRED] contradiction [COEFF] 3.8681  
[P] A young boy viewing a statue of a war hero.  
[H] A young boy is playing a a playground.

[LABEL] contradiction [PRED] contradiction [COEFF] 3.8158  
[P] A man with a red fringed shirt is playing a banjo.  
[H] A man playing pinball in a bar.

## 1.25 Component 24

[LABEL] **contradiction** [PRED] **contradiction** [COEFF] 5.1091

[P] People having fun at a barbecue party.

[H] People fighting at a buffet.

[LABEL] **contradiction** [PRED] **contradiction** [COEFF] 4.6809

[P] Tattooed woman lifting weights.

[H] Tattooed woman eating a sandwich.

[LABEL] **entailment** [PRED] **contradiction** [COEFF] 4.6720

[P] A mechanic below a truck conducting repairs.

[H] A mechanic fixing a car.

[LABEL] **contradiction** [PRED] **contradiction** [COEFF] 4.6109

[P] Two girls making book covers out of colored paper.

[H] Two girls are making pies.

[LABEL] **contradiction** [PRED] **contradiction** [COEFF] 4.0378

[P] Little girl looking through a camera.

[H] A little girl is holding a stick.

[LABEL] **contradiction** [PRED] **contradiction** [COEFF] 4.0342

[P] A man is holding a skull.

[H] A man holding a watermelon in his hand

[LABEL] **contradiction** [PRED] **contradiction** [COEFF] 3.8369

[P] Lady buying groceries from a 3rd party person.

[H] A person buying a car.

[LABEL] **contradiction** [PRED] **contradiction** [COEFF] 3.8144

[P] Two women discussing at a red table in a restaurant.

[H] Two women exercise in a park.

[LABEL] **contradiction** [PRED] **contradiction** [COEFF] 3.7007

[P] Man performing at concert saying thank you to fans.

[H] A man diving off a board.

[LABEL] **contradiction** [PRED] **contradiction** [COEFF] 3.6851

[P] A gymnast vaults through the air.

[H] A orangutan leaps into the air.

[LABEL] **contradiction** [PRED] **contradiction** [COEFF] 3.6175

[P] Little boy standing under a tree in the park after throwing a frisbee.

[H] A little boy stands under a bridge.

[LABEL] **contradiction** [PRED] **contradiction** [COEFF] 3.4688

[P] Couple in white kissing on beach.  
[H] Naked couple having sex in the forest.

[LABEL] **contradiction** [PRED] **contradiction** [COEFF] 3.4274  
[P] A man in his workshop making artifacts.  
[H] A man going into surgery.

[LABEL] **contradiction** [PRED] **contradiction** [COEFF] 3.3330  
[P] A couple posing in front of a picture wall  
[H] A couple sleeping in front of a wall.

[LABEL] **contradiction** [PRED] **contradiction** [COEFF] 3.3299  
[P] A large dog licking its nose.  
[H] A dog is licking its balls.

[LABEL] **contradiction** [PRED] **contradiction** [COEFF] 3.2823  
[P] It's time to jog for good exercise.  
[H] Sitting down to smoke is good exercise.

## 1.26 Component 25

[LABEL] **entailment** [PRED] **entailment** [COEFF] 16.6242  
[P] A man in a red shirt and jacket leads a group of other man with a large group of spotted dogs.  
[H] A man in a shirt is leading a group.

[LABEL] **entailment** [PRED] **entailment** [COEFF] 13.9480  
[P] A man in a blue jacket has fallen asleep while sitting on a fold - able chair, with a fishing pole and a green umbrella.  
[H] A man has fallen asleep in his chair.

[LABEL] **entailment** [PRED] **entailment** [COEFF] 13.1235  
[P] A little blond boy is petting a resting tiger.  
[H] A boy is petting a tiger

[LABEL] **entailment** [PRED] **entailment** [COEFF] 12.5874  
[P] A man in a hat is sitting next to a little boy and next to a metal bucket.  
[H] A man and a boy are sitting next to each other.

[LABEL] **contradiction** [PRED] **entailment** [COEFF] 11.7571  
[P] A man in an orange shirt is walking over fire while a crowd watches.  
[H] A man is in the crowd watching fire.

[LABEL] **entailment** [PRED] **entailment** [COEFF] 11.6253  
[P] A shirtless man is painting street art on a concrete wall.  
[H] A man paints street art on a wall.

[LABEL] entailment [PRED] entailment [COEFF] 11.5478  
[P] A woman smiles as she cleans the floor with rags while a child lies recumbent on the sofa.  
[H] A woman smiles as she cleans the floor while a child lies on the sofa

[LABEL] entailment [PRED] entailment [COEFF] 11.2122  
[P] A bearded man in a blue work helmet kneels down in a construction zone on the edge of a body of water.  
[H] A man in a helmet kneels down.

[LABEL] entailment [PRED] entailment [COEFF] 11.0914  
[P] A woman in a swimsuit walks along the street next to three trees.  
[H] A woman in a swimsuit walks along the street.

[LABEL] entailment [PRED] entailment [COEFF] 11.0781  
[P] A horse looking sad and tired with a cowboy - looking man holds a rope in his hands sits on it.  
[H] A horse with a cowboy looking man

[LABEL] entailment [PRED] entailment [COEFF] 10.9965  
[P] A man with a bucket and a child pointing to some machinery.  
[H] A man, a child, and a bucket.

[LABEL] entailment [PRED] entailment [COEFF] 10.4166  
[P] A black - haired woman in a white skirt and black boots is carrying a red bag and walking down the street.  
[H] A woman in a skirt and boots walks down the street, carrying her red bag with her.

[LABEL] entailment [PRED] entailment [COEFF] 10.3799  
[P] A man in black is sitting in a restaurant.  
[H] A man is sitting

[LABEL] entailment [PRED] entailment [COEFF] 10.3240  
[P] A little boy is squatting down looking at colorful pieces of paper while grownup look on.  
[H] A boy squats down.

[LABEL] entailment [PRED] entailment [COEFF] 10.0936  
[P] A man in gray pants and orange shorts is sitting on a pole that has cables running from it.  
[H] A man in orange shorts is sitting on a pole.

[LABEL] entailment [PRED] entailment [COEFF] 9.7499  
[P] A man holds up a cardboard sign near a wall with red graffiti.  
[H] A man holds up a sign by a wall.

## 1.27 Component 26

[LABEL] neutral [PRED] neutral [COEFF] 11.4164  
[P] A boy is jumping a rail on his bicycle.  
[H] A boy is showing off for his girlfriend.

[LABEL] contradiction [PRED] contradiction [COEFF] 10.1729

[P] A woman in a red dress prepares for another day at work.

[H] The woman is preparing to go on vacation.

[LABEL] neutral [PRED] neutral [COEFF] 9.4496

[P] There is a line of people dressed for cool weather waiting against a tall iron work fence.

[H] The group is waiting for a bus

[LABEL] neutral [PRED] contradiction [COEFF] 9.3211

[P] Two employees are taking a break on the stairs.

[H] Two people are having a smoke break at work.

[LABEL] neutral [PRED] contradiction [COEFF] 9.2052

[P] A woman works on a piece of computer equipment, while surrounded by a variety of mechanical and computer equipment, in what appears to be some type of laboratory workroom.

[H] The woman is studying the effects of a new medicine.

[LABEL] neutral [PRED] neutral [COEFF] 9.1343

[P] Two blond girls reading books in a bookstore.

[H] The girls are studying for an exam

[LABEL] neutral [PRED] contradiction [COEFF] 8.9609

[P] A group of people outside a barn.

[H] Several people are at a party.

[LABEL] neutral [PRED] contradiction [COEFF] 8.8075

[P] A woman is working on an ice sculpture.

[H] She is sculpting the face of her son.

[LABEL] neutral [PRED] contradiction [COEFF] 8.4853

[P] Various people sitting on a subway.

[H] People on their way home.

[LABEL] neutral [PRED] contradiction [COEFF] 8.3284

[P] A young child is jumping on an inflatable castle

[H] The child is playing in a birthday party.

[LABEL] contradiction [PRED] contradiction [COEFF] 8.2914

[P] People surrounding a telescope to view things at a great distance.

[H] They are having a buying jewelry at a party

[LABEL] neutral [PRED] contradiction [COEFF] 7.9928

[P] A man and his wife take a trip back in time at a masquerade party.

[H] A man and woman as a party celebrating a birthday

[LABEL] contradiction [PRED] contradiction [COEFF] 7.9654

[P] A crowd of people attend an outdoor event.

[H] A crowd of people are waiting for a bus.

[LABEL] **neutral** [PRED] **contradiction** [COEFF] 7.8595

[P] A woman demonstrates how to operate a vacuum cleaner while others watch.

[H] A woman is trying to make a sale.

[LABEL] **neutral** [PRED] **neutral** [COEFF] 7.8465

[P] A group of people relaxing at some tables.

[H] The group is celebrating a friends birthday

[LABEL] **neutral** [PRED] **neutral** [COEFF] 7.8304

[P] The woman with the bright red umbrella is taking a picture.

[H] A woman is taking pictures for her children.

## 1.28 Component 27

[LABEL] **entailment** [PRED] **entailment** [COEFF] 10.0504

[P] Two women in head wraps.

[H] Two women in head wraps.

[LABEL] **entailment** [PRED] **entailment** [COEFF] 9.7847

[P] Two off road bikers stopped in a creek.

[H] Two off road bikers stopped in a creek.

[LABEL] **entailment** [PRED] **entailment** [COEFF] 9.7527

[P] Two young girls play in public sprinklers.

[H] Two young girls play in sprinklers.

[LABEL] **entailment** [PRED] **entailment** [COEFF] 9.5797

[P] Two people in a slingshot ride.

[H] Two people in a slingshot ride.

[LABEL] **entailment** [PRED] **entailment** [COEFF] 9.4981

[P] Two little girls slide down an inflated slide.

[H] Two girls slide down a slide.

[LABEL] **entailment** [PRED] **entailment** [COEFF] 9.4916

[P] Two people are asleep in the floor.

[H] Two people are sleeping on the floor.

[LABEL] **entailment** [PRED] **entailment** [COEFF] 8.8880

[P] Two black dogs chase each other on grass.

[H] Black dogs chase each other on grass.

[LABEL] **entailment** [PRED] **entailment** [COEFF] 8.7262



[P] Two motorcycles with two riders each.  
[H] Two motorcycles with two riders.

[LABEL] **entailment** [PRED] **entailment** [COEFF] 8.4385  
[P] Asian buffet style restaurant.  
[H] Asian buffet style restaurant.

[LABEL] **entailment** [PRED] **entailment** [COEFF] 7.9176  
[P] A decorated car headed down the street.  
[H] A car headed down the street.

[LABEL] **entailment** [PRED] **entailment** [COEFF] 7.8212  
[P] People moving by a corner in a town.  
[H] People moving by a corner in town.

[LABEL] **entailment** [PRED] **entailment** [COEFF] 7.6468  
[P] A man in snowshoes runs across the snow.  
[H] A man runs across the snow.

[LABEL] **entailment** [PRED] **entailment** [COEFF] 7.3568  
[P] A group of people sitting on the ground on the sidewalk  
[H] A group of people sitting on the sidewalk.

[LABEL] **entailment** [PRED] **entailment** [COEFF] 7.3138  
[P] A man and four teenage boys are raking a baseball diamond.  
[H] A man and teenage boys are raking a baseball diamond.

[LABEL] **entailment** [PRED] **entailment** [COEFF] 7.1158  
[P] Two people film on a snowy day.  
[H] People film on a snowy day.

[LABEL] **entailment** [PRED] **entailment** [COEFF] 7.0359  
[P] An older man in boxing gloves trains.  
[H] A man in boxing gloves trains.

## 1.29 Component 28

[LABEL] **contradiction** [PRED] **contradiction** [COEFF] 53.9416  
[P] Children watch a pigeon in a public square.  
[H] Adults play with a parrot outdoors.

[LABEL] **contradiction** [PRED] **contradiction** [COEFF] 46.8484  
[P] Two children are playing a game near a stage area.  
[H] Two adults are playing a game near a stage area

[LABEL] **contradiction** [PRED] **contradiction** [COEFF] 44.7853

[P] A group of children in coats are standing and sitting on a sidewalk.

[H] A group of adults in coats.

[LABEL] **contradiction** [PRED] **contradiction** [COEFF] 39.0948

[P] Group of kids riding scooters.

[H] Group of adults riding scooters.

[LABEL] **contradiction** [PRED] **contradiction** [COEFF] 35.3758

[P] Two small children are twirling sparkling rope.

[H] Two adults are playing

[LABEL] **contradiction** [PRED] **contradiction** [COEFF] 35.2594

[P] A group of young children wearing blue robes are standing in front of a crowd with their hands interlaced.

[H] A group of adults sing to the crowd.

[LABEL] **contradiction** [PRED] **contradiction** [COEFF] 35.1346

[P] Two children playing in a river near a wooden bridge.

[H] Adults are outside hunting wild animals.

[LABEL] **contradiction** [PRED] **contradiction** [COEFF] 35.0898

[P] Two kids in a developing nation are playing a table top game under an awning made from burlap.

[H] There are three adults playing poker.

[LABEL] **contradiction** [PRED] **contradiction** [COEFF] 34.4671

[P] Several children stand around in pink ballerina tutu outfits.

[H] Several adults talk about sports in the bar.

[LABEL] **contradiction** [PRED] **contradiction** [COEFF] 32.3242

[P] Two small brightly dressed african children with water bottles are sitting on a stone floor.

[H] A group of adults are dancing.

[LABEL] **contradiction** [PRED] **contradiction** [COEFF] 31.7765

[P] Two little girls, sitting on a brick wall, sharing at a book.

[H] Adults are singing.

[LABEL] **contradiction** [PRED] **contradiction** [COEFF] 30.6683

[P] Many children and some parents are waiting near a decorated castle.

[H] A group of adults are waiting near a plain castle.

[LABEL] **contradiction** [PRED] **contradiction** [COEFF] 30.3662

[P] A choir consisting of children dressed in blue, younger members in red, and older in black, is performing on a 2nd floor overlook.

[H] A choir consisting of adults sits down.

[LABEL] **contradiction** [PRED] **contradiction** [COEFF] 28.3646

[P] A young child, who has a cast on her arm, is diving into a pool.

[H] An adult is diving into a pool.

[LABEL] **contradiction** [PRED] **contradiction** [COEFF] 27.6000  
[P] Two little boys reading and looking at books on the stairs.  
[H] Adults are playing on their iphones.

[LABEL] **contradiction** [PRED] **contradiction** [COEFF] 26.9255  
[P] Four children in black and red hats and black clothes perform.  
[H] Adults reenacting a battle.

### 1.30 Component 29

[LABEL] **contradiction** [PRED] **contradiction** [COEFF] 9.3101  
[P] 3 gentleman look at a bike that's turned upside down.  
[H] The men are asleep on a tree

[LABEL] **contradiction** [PRED] **contradiction** [COEFF] 8.9847  
[P] A construction worker is using a piece of machinery.  
[H] A doctor runs nude through the hospital.

[LABEL] **contradiction** [PRED] **contradiction** [COEFF] 8.6711  
[P] A woman wearing a black shirt is blowing a kiss.  
[H] A man in white stands still.

[LABEL] **contradiction** [PRED] **contradiction** [COEFF] 8.1884  
[P] A cyclist carries his bicycle while jumping over a hurdle.  
[H] A man is standing still in the street.

[LABEL] **contradiction** [PRED] **contradiction** [COEFF] 7.9704  
[P] Group of asian men playing volleyball  
[H] Girl sits home alone tonihgt

[LABEL] **contradiction** [PRED] **contradiction** [COEFF] 7.9565  
[P] One man in a rugby uniform is grabbing the arm of another man holding a football.  
[H] The rugby player is asleep at home.

[LABEL] **contradiction** [PRED] **contradiction** [COEFF] 7.7348  
[P] A boy crouching behind some small logs playing paintball.  
[H] A girl is alone in an open field looking at a butterfly.

[LABEL] **contradiction** [PRED] **contradiction** [COEFF] 7.7323  
[P] Ethnic dancer stands in front of other performers on a stage.  
[H] The american woman is alone and doing cartwheels on the stage.

[LABEL] **contradiction** [PRED] **contradiction** [COEFF] 7.6796  
[P] A girl kisses another little girl while the third is falling out of frame.  
[H] A child sits alone in her room.

[LABEL] **contradiction** [PRED] **contradiction** [COEFF] 7.5968  
 [P] A man is talking into a microphone while people stand around him.  
 [H] A woman is sitting alone on the floor.

[LABEL] **contradiction** [PRED] **contradiction** [COEFF] 7.5483  
 [P] The girl in the salmon colored bikini is standing next to two young people ; one is wearing a black outfit and the other is drinking pop.  
 [H] Elderly men wait at a bus stop.

[LABEL] **contradiction** [PRED] **contradiction** [COEFF] 7.4760  
 [P] A woman, wearing sunglasses, a red athletic top, and running shorts competes in a marathon.  
 [H] A man wearing nothing joins in a polar bear plunge.

[LABEL] **contradiction** [PRED] **contradiction** [COEFF] 7.2924  
 [P] A man looks out over frozen tundra.  
 [H] The woman sat alone

[LABEL] **contradiction** [PRED] **contradiction** [COEFF] 7.0135  
 [P] A blond woman is opening a present with a surprised look while other women around her are sitting with concerned faces.  
 [H] A man opens a box alone in his living room

[LABEL] **contradiction** [PRED] **contradiction** [COEFF] 6.8037  
 [P] A woman and a boy playing a board game at a table.  
 [H] The woman is alone at her computer desk.

[LABEL] **contradiction** [PRED] **contradiction** [COEFF] 6.6846  
 [P] Two children and some adults are sitting on a row of black couches.  
 [H] The man is standing by a tree

### 1.31 Component 30

[LABEL] **entailment** [PRED] **entailment** [COEFF] 20.6011  
 [P] A man in a yellow shirt covered in sweat playing a guitar.  
 [H] The man is wearing yellow.

[LABEL] **neutral** [PRED] **entailment** [COEFF] 20.0092  
 [P] A girl in a yellow dress runs across the roof of a baseball dugout during a game.  
 [H] The girl is wearing yellow

[LABEL] **entailment** [PRED] **entailment** [COEFF] 18.4498  
 [P] Man in blue shirt playing water instrument in an orchestra.  
 [H] The man is wearing blue

[LABEL] **entailment** [PRED] **entailment** [COEFF] 17.9007  
 [P] A little boy wearing a red jacket playing with a thomas the train set.

[H] The boy is wearing red.

[LABEL] entailment [PRED] entailment [COEFF] 17.5539

[P] A man in a blue shirt riding a motorcycle in japan.

[H] The man is wearing a blue shirt.

[LABEL] entailment [PRED] entailment [COEFF] 16.2000

[P] A man in a blue shirt looks off into the distance.

[H] A man is wearing blue.

[LABEL] entailment [PRED] entailment [COEFF] 14.3357

[P] A woman in a red collared shirt and purple baseball cap, is wearing a backpack and balancing a large blue tub on top of her head.

[H] The woman is wearing red.

[LABEL] entailment [PRED] entailment [COEFF] 14.2264

[P] A woman in a blue coat and dark boots.

[H] A woman is wearing blue.

[LABEL] entailment [PRED] entailment [COEFF] 14.1176

[P] A man in a green coat crossing the street with graffiti in the background.

[H] The man has a green coat

[LABEL] entailment [PRED] entailment [COEFF] 14.0930

[P] A daughter, wearing all pink, watches her mother conduct the demonstration.

[H] The daughter is wearing pink

[LABEL] entailment [PRED] entailment [COEFF] 13.9999

[P] Two people in orange shirts hanging a billboard.

[H] Two people are wearing orange.

[LABEL] entailment [PRED] entailment [COEFF] 13.1219

[P] A sailor in a white shirt holding his hand out as men and women pass and go up some stairs.

[H] Sailor in white shirt

[LABEL] entailment [PRED] entailment [COEFF] 13.0556

[P] A man in a red t - shirt and khakis plays the hand drums for a crowd of people.

[H] The man is wearing a red shirt.

[LABEL] entailment [PRED] entailment [COEFF] 12.7795

[P] A little girl wearing striped pants, a pink top, and boots follows two older girls on horseback.

[H] The girl is wearing striped pants.

[LABEL] entailment [PRED] entailment [COEFF] 12.7000

[P] A girl in a black outfit hula hoops while people sit at tables eating.

[H] The girl is wearing black.

[LABEL] entailment [PRED] entailment [COEFF] 12.2162  
[P] One boy in a black shirt is grabbing the flag of the boy in the red shirt with the football.  
[H] The boy is wearing black.

### 1.32 Component 31

[LABEL] entailment [PRED] entailment [COEFF] 26.5984  
[P] A group of people walking a city street in warm weather.  
[H] A group of people walking

[LABEL] entailment [PRED] entailment [COEFF] 23.3718  
[P] An unusual looking vehicle parked i front of some stores.  
[H] An unusual vehicle parked.

[LABEL] entailment [PRED] entailment [COEFF] 22.2787  
[P] A group of students, one splattered with paint, while another makes a gesture towards the camera, walk along the street.  
[H] A group of students

[LABEL] entailment [PRED] entailment [COEFF] 18.4923  
[P] A group of five workers are gathered around bushes next to a mcdonald's sign.  
[H] A group of workers gathers

[LABEL] entailment [PRED] entailment [COEFF] 18.2742  
[P] Two boys in blue shirts fighting behind a gray car and two other children.  
[H] Two boys fighting

[LABEL] entailment [PRED] entailment [COEFF] 17.4803  
[P] A man jumping in a mud puddle in the middle of the street  
[H] A man jumps in mud.

[LABEL] entailment [PRED] entailment [COEFF] 16.7652  
[P] A little boy shows off his new shovel toy on christmas.  
[H] A little boy shows off a toy.

[LABEL] neutral [PRED] entailment [COEFF] 16.4389  
[P] Two young children jumping off of a cement ledge onto the dirt ground.  
[H] Two young children jumping off

[LABEL] entailment [PRED] entailment [COEFF] 15.9999  
[P] A bunch of people are waiting for the next subway train.  
[H] A bunch of people are waiting

[LABEL] entailment [PRED] entailment [COEFF] 15.7264  
[P] A person with a cane sitting on the street bowing their head.  
[H] A person bows their head.

[LABEL] **entailment** [PRED] **entailment** [COEFF] 14.9693

[P] Girls wearing pink and blue uniforms are playing a soccer game.

[H] Girls wearing pink and blue uniforms

[LABEL] **entailment** [PRED] **entailment** [COEFF] 14.9573

[P] A coach is talking with his team of young players dressed in green jerseys.

[H] A coach is talking with his team.

[LABEL] **entailment** [PRED] **entailment** [COEFF] 14.7088

[P] The pizza maker is laughing at the white dog watching him through the window.

[H] The pizza maker laughs at the dog.

[LABEL] **entailment** [PRED] **entailment** [COEFF] 14.6226

[P] A large group of young women outside, all wearing the same blue tracksuit, waving and smiling at the camera.

[H] A large group of young women outside.

[LABEL] **entailment** [PRED] **entailment** [COEFF] 14.5827

[P] A group of people carrying shopping bags and baskets talks to each other in the middle of a sidewalk at night.

[H] A group of people are talking to each other.

[LABEL] **entailment** [PRED] **entailment** [COEFF] 14.4891

[P] Two dogs tussle in the snow over a tennis ball.

[H] Two dogs tussle in the snow.

### 1.33 Component 32

[LABEL] **contradiction** [PRED] **contradiction** [COEFF] 13.2087

[P] A small group of asian youths gathered on the sidewalk looking into camera and playing around.

[H] The american children are on the sidewalk.

[LABEL] **contradiction** [PRED] **contradiction** [COEFF] 9.6505

[P] Four asian toddlers nap on a floor.

[H] Four mexican toddlers nap on a floor.

[LABEL] **contradiction** [PRED] **contradiction** [COEFF] 9.0556

[P] An asian family of four sitting around a short table.

[H] An african - american family is lounging by the pool.

[LABEL] **contradiction** [PRED] **contradiction** [COEFF] 8.7952

[P] Four asian children, three girls and one boy, sit behind a volcano diorama.

[H] Four hispanic children are watching the sun rise.

[LABEL] **contradiction** [PRED] **contradiction** [COEFF] 8.5459

[P] A group of african villagers at school.

[H] The villagers are american.

[LABEL] **contradiction** [PRED] **contradiction** [COEFF] 8.3717

[P] Asian workers in a warehouse are assembling products.

[H] Mexican workers are playing soccer

[LABEL] **contradiction** [PRED] **contradiction** [COEFF] 8.1585

[P] An asian man riding his bicycle down the street.

[H] An american walking on the beach.

[LABEL] **neutral** [PRED] **contradiction** [COEFF] 6.8398

[P] Two indian women loading bricks to carry on their heads.

[H] Two asian women are going to carry bricks.

[LABEL] **contradiction** [PRED] **contradiction** [COEFF] 6.6687

[P] A woman in brown is holding her child in front of an asian - inspired building.

[H] The building looks european

[LABEL] **contradiction** [PRED] **contradiction** [COEFF] 6.5279

[P] An asian chef makes kabobs.

[H] An american chef makes kebabs.

[LABEL] **contradiction** [PRED] **contradiction** [COEFF] 6.4381

[P] A young preteen girl of asian heritage is floating inside a large bowl in a body of water using an oar.

[H] A preteen caucasian girl is floating on a round bowl using a wooden object to paddle.

[LABEL] **contradiction** [PRED] **contradiction** [COEFF] 6.4358

[P] Many middle eastern people are sitting in the back of a blue truck.

[H] The people sitting in the truck are from mexico.

[LABEL] **contradiction** [PRED] **contradiction** [COEFF] 6.1755

[P] Two shirtless asian men playing table tennis.

[H] Two white men playing catch.

[LABEL] **contradiction** [PRED] **contradiction** [COEFF] 6.0970

[P] A middle eastern man sells chicken from a street market booth.

[H] The asian man sold pigs from the street market booth.

[LABEL] **contradiction** [PRED] **contradiction** [COEFF] 6.0448

[P] Asian people sitting on an airplane waiting as the flight attendants is serving them food.

[H] Swedish passengers are watching a movie on a plane.

[LABEL] **contradiction** [PRED] **contradiction** [COEFF] 6.0249

[P] An african woman is holding a small child in her arms.

[H] The woman is from hong kong.



### 1.34 Component 33

[LABEL] **contradiction** [PRED] **contradiction** [COEFF] 18.1934

[P] A bicyclist jumping with his bike in midair

[H] Nobody is jumping

[LABEL] **contradiction** [PRED] **contradiction** [COEFF] 15.8333

[P] A brunette wearing a black tank top and camouflage shorts walking down the street in a major city near a metro subway station.

[H] Nobody is walking

[LABEL] **contradiction** [PRED] **contradiction** [COEFF] 15.0520

[P] A little boy is jumping into an outdoor kiddie pool

[H] Nobody is jumping

[LABEL] **contradiction** [PRED] **contradiction** [COEFF] 14.8415

[P] A man in a gray top sitting with his back on a gray wall sitting on the ground with his eyes closed.

[H] Nobody is sitting

[LABEL] **contradiction** [PRED] **contradiction** [COEFF] 14.4857

[P] A man relaxes with his backpack.

[H] Nobody is relaxing.

[LABEL] **contradiction** [PRED] **contradiction** [COEFF] 14.2420

[P] A baby dressed in pink, with a pacifier in her mouth is standing with one hand on a window.

[H] Nobody is standing

[LABEL] **contradiction** [PRED] **contradiction** [COEFF] 14.1486

[P] A woman rides a horse carrying an american flag.

[H] Nobody is riding

[LABEL] **contradiction** [PRED] **contradiction** [COEFF] 13.7699

[P] A surfer is falling of his surfboard in the middle of a crashing wave.

[H] There is nobody in the water surfing.

[LABEL] **contradiction** [PRED] **contradiction** [COEFF] 13.2891

[P] A man with his shirt off sweats profusely as he takes a break by a wall.

[H] Nobody is taking a break

[LABEL] **contradiction** [PRED] **contradiction** [COEFF] 12.1784

[P] A man smiling while shining another man's shoes.

[H] Nobody is smiling

[LABEL] **contradiction** [PRED] **contradiction** [COEFF] 12.0001

[P] A young female softball outfielder has just thrown a ball, while players run to their bases.

[H] Nobody is throwing

[LABEL] **contradiction** [PRED] **contradiction** [COEFF] 11.9854

[P] Young adult sleeping in a room full of people.

[H] Nobody is sleeping

[LABEL] **contradiction** [PRED] **contradiction** [COEFF] 11.8419

[P] A man on a bus drives past another man on the street.

[H] Nobody is driving

[LABEL] **contradiction** [PRED] **contradiction** [COEFF] 11.6820

[P] A man selling a bundle of balloons on a boardwalk

[H] Nobody is selling

[LABEL] **contradiction** [PRED] **contradiction** [COEFF] 11.3249

[P] A dark - skinned man is jumping in the air during a sports game.

[H] Nobody is jumping.

[LABEL] **contradiction** [PRED] **contradiction** [COEFF] 11.1307

[P] A person in a canoe is rafting in wild waters.

[H] Nobody is rafting.

### 1.35 Component 34

[LABEL] **entailment** [PRED] **entailment** [COEFF] 12.6427

[P] The girl is wearing a blue shirt and jumping in the air.

[H] The girl jumps in the air.

[LABEL] **entailment** [PRED] **entailment** [COEFF] 9.5419

[P] Young boy in blue swimming trunks is jumping into a pool.

[H] A boy jumps into a pool.

[LABEL] **entailment** [PRED] **entailment** [COEFF] 7.7390

[P] A man with a red and white shirt and blue shorts, is jumping to hit a tennis ball with his racket.

[H] A man jumps to hit the ball.

[LABEL] **entailment** [PRED] **entailment** [COEFF] 7.3785

[P] A child, arms outstretched, has just jumped outwards out of blueish green ocean water.

[H] A child jumps

[LABEL] **entailment** [PRED] **entailment** [COEFF] 7.2416

[P] A female swimmer in a black bathing suit about to jump off the racing platform into a pool.

[H] A woman jumps into a pool.

[LABEL] **neutral** [PRED] **entailment** [COEFF] 7.0503

[P] A boy in red swimming trunks is jumping into the pool.

[H] The boy is jumping into his pool.

[LABEL] **entailment** [PRED] **entailment** [COEFF] 6.9701

[P] A child is jumping into the water next to a pile of seaweed.

[H] A child jumps into the water.

[LABEL] **neutral** [PRED] **entailment** [COEFF] 6.8599

[P] Two men run across a field near a parking lot

[H] Two men race across a field.

[LABEL] **entailment** [PRED] **entailment** [COEFF] 6.7566

[P] The person wearing flannel shorts is jumping over a fountain.

[H] A person jumps over a fountain.

[LABEL] **entailment** [PRED] **entailment** [COEFF] 6.7181

[P] A girl with arms raised in sliding down a red and white slide.

[H] The girl slid down the slide.

[LABEL] **entailment** [PRED] **entailment** [COEFF] 6.5655

[P] A brown dog leaps through the snow in a field.

[H] The dog leaps through the snow.

[LABEL] **entailment** [PRED] **entailment** [COEFF] 6.2217

[P] A group of bulls are running down a street as people run and others watch.

[H] Bulls are chasing people down the street.

[LABEL] **entailment** [PRED] **entailment** [COEFF] 5.9218

[P] Two young girls are running through a fountain.

[H] Two girls run.

[LABEL] **entailment** [PRED] **entailment** [COEFF] 5.8177

[P] A young girl jumping in the sand on the beach

[H] A girl jumps in the sand

[LABEL] **entailment** [PRED] **entailment** [COEFF] 5.6528

[P] Two boys are running on a path among green leafy trees.

[H] Two boys are running past trees.

[LABEL] **neutral** [PRED] **entailment** [COEFF] 5.4257

[P] A woman in a white shirt and black cropped pants climbs a rock wall.

[H] A woman climbs the wall

### 1.36 Component 35

[LABEL] **contradiction** [PRED] **contradiction** [COEFF] 5.3821

[P] A mother and her daughter are enjoying a ride in a strawberry at a theme park.

[H] The mother and daughter are at home.

[LABEL] **contradiction** [PRED] **contradiction** [COEFF] 4.9379

[P] A man and a blond woman whisper to each other in a bar.

[H] A man and a women are at home watching a show.

[LABEL] contradiction [PRED] contradiction [COEFF] 4.1515

[P] A woman just let go of a bowling ball at the bowling alley.

[H] A woman is at home.

[LABEL] contradiction [PRED] contradiction [COEFF] 4.0465

[P] This couple is enjoying a bike ride through amsterdam and using their guidebooks to find an especially interesting route.

[H] The couple are at home watching television.

[LABEL] contradiction [PRED] contradiction [COEFF] 3.9351

[P] Young man doing a trick jump on a skateboard.

[H] A man is writing books

[LABEL] contradiction [PRED] contradiction [COEFF] 3.9041

[P] A jockey in yellow and a jockey in blue are racing their horses down a grassy raceway.

[H] The jockies are at home watching tv.

[LABEL] contradiction [PRED] contradiction [COEFF] 3.6726

[P] A lady in a green jacket and heart decorated head covering, stands outside in the cold with a painted building in the background.

[H] A christian man strips to nudity indoors.

[LABEL] contradiction [PRED] contradiction [COEFF] 3.6716

[P] Two young children are seated in front of a live band.

[H] Two young children play in a park.

[LABEL] contradiction [PRED] contradiction [COEFF] 3.6436

[P] A child sitting at a restaurant table holding a paper mask against his face.

[H] A child is at home playing.

[LABEL] contradiction [PRED] contradiction [COEFF] 3.5779

[P] Two women are picking something from a garden and placing it in a blue pail.

[H] Two women are in the space station.

[LABEL] contradiction [PRED] contradiction [COEFF] 3.5385

[P] A woman is holding a piece of wood while a man is drilling it.

[H] The man is on a swing.

[LABEL] contradiction [PRED] contradiction [COEFF] 3.5216

[P] A hippie playing his guitar.

[H] A hippie runs a race.

[LABEL] contradiction [PRED] contradiction [COEFF] 3.3437

[P] A man wearing japanese clothes shoots an arrow at a target.

[H] A man drinking soft drink

[LABEL] **contradiction** [PRED] **contradiction** [COEFF] 3.3126

[P] A player in blue falls on his face during a field hockey match.

[H] A rugby player scores.

[LABEL] **contradiction** [PRED] **contradiction** [COEFF] 3.3069

[P] Two white males are doing a set at a venue with guitars and vocals.

[H] The two white males are at home.

[LABEL] **contradiction** [PRED] **contradiction** [COEFF] 3.2715

[P] A skateboarder is in midair as he completes a trick.

[H] A magician is doing a trick

### 1.37 Component 36

[LABEL] **entailment** [PRED] **entailment** [COEFF] 36.1684

[P] A man standing in a white lab coat with his arm raised.

[H] A man is standing.

[LABEL] **neutral** [PRED] **entailment** [COEFF] 31.1091

[P] A man in white stands in front of a barbecue.

[H] A man is standing

[LABEL] **entailment** [PRED] **entailment** [COEFF] 30.5783

[P] A man in black stands beside a tall building.

[H] A man is standing.

[LABEL] **entailment** [PRED] **entailment** [COEFF] 25.5831

[P] People stand on the balcony and deck of a boat.

[H] People are standing

[LABEL] **entailment** [PRED] **entailment** [COEFF] 25.3125

[P] A group of people are standing around a dragster.

[H] People are standing

[LABEL] **entailment** [PRED] **entailment** [COEFF] 24.2654

[P] A woman is standing on a road.

[H] A woman is standing.

[LABEL] **entailment** [PRED] **entailment** [COEFF] 23.8448

[P] A little school boy in white shirt standing at the lime soda cart giving pose to the photographer.

[H] The school boy is standing.

[LABEL] **entailment** [PRED] **entailment** [COEFF] 21.2151

[P] A man standing with his work gloves on and hard hat in hand, looking attentive.

[H] A man is standing.

[LABEL] **entailment** [PRED] **entailment** [COEFF] 20.7034

[P] A group of men standing around with a woman in japan.

[H] Men are standing

[LABEL] **entailment** [PRED] **entailment** [COEFF] 20.5140

[P] Several men in construction uniforms are standing together.

[H] They are standing.

[LABEL] **entailment** [PRED] **entailment** [COEFF] 20.4411

[P] A girl in a white shirt with a ponytail stands with her purse on her shoulder.

[H] A girl standing.

[LABEL] **entailment** [PRED] **entailment** [COEFF] 19.9762

[P] A woman in a straw hat standing in front of a table covered in miscellaneous items.

[H] The woman is standing.

[LABEL] **entailment** [PRED] **entailment** [COEFF] 18.9928

[P] A man is standing with his eyes closed.

[H] A man is standing.

[LABEL] **entailment** [PRED] **entailment** [COEFF] 18.4295

[P] Man in sleeveless shirt and shorts standing in the middle of the floor.

[H] Man standing.

[LABEL] **entailment** [PRED] **entailment** [COEFF] 18.3636

[P] A gangster standing at a bus stop.

[H] The person is standing.

[LABEL] **entailment** [PRED] **entailment** [COEFF] 18.2877

[P] A man is standing on a baseball field in front of a crowd.

[H] A man is standing

### 1.38 Component 37

[LABEL] **contradiction** [PRED] **contradiction** [COEFF] 18.4721

[P] Four people are sitting on the beach, looking out towards the ocean.

[H] Four people are getting drinks at a bar.

[LABEL] **contradiction** [PRED] **contradiction** [COEFF] 14.2715

[P] Two people walking along a huge desert with a statue in the distance.

[H] Two people are eating a meal at a cafe.

[LABEL] **contradiction** [PRED] **contradiction** [COEFF] 13.5347

[P] A family standing in shallow water.

[H] The family are eating at a restaurant.

[LABEL] contradiction [PRED] contradiction [COEFF] 13.3624

[P] Two men are riding a couple of horses, chasing a white animal.

[H] The men are sipping beers under a palm tree

[LABEL] contradiction [PRED] contradiction [COEFF] 13.3013

[P] Two men gather in the lobby of a building.

[H] Two men sit in an outdoor cafe.

[LABEL] contradiction [PRED] contradiction [COEFF] 13.1899

[P] Two men are riding down the street on a bicycle next to a gray building.

[H] Two men are sitting in a cafe drinking coffee.

[LABEL] contradiction [PRED] contradiction [COEFF] 12.4570

[P] A group of indigenous people relaxing outside of their hut.

[H] A bunch of business people are standing outside a tall building.

[LABEL] contradiction [PRED] contradiction [COEFF] 12.4303

[P] This man is getting ready to go snorkeling in the water behind him.

[H] Two goldfish are riding bikes in a giant pile of mashed potatoes.

[LABEL] contradiction [PRED] contradiction [COEFF] 11.5302

[P] A couple with sunglasses are laying on the beach.

[H] A couple are eating dinner at a restaurant.

[LABEL] contradiction [PRED] contradiction [COEFF] 11.2585

[P] A man jumps into the air at the beach.

[H] A man is running on the sidewalk

[LABEL] contradiction [PRED] contradiction [COEFF] 10.9173

[P] Some people standing around a smoke pit thing.

[H] Two goldfish are riding bikes in a giant pile of mashed potatoes.

[LABEL] contradiction [PRED] contradiction [COEFF] 9.7317

[P] Children are having fun playing in the water and on shore at the beach.

[H] Children mope about in a hotel lobby.

[LABEL] contradiction [PRED] contradiction [COEFF] 9.7198

[P] A woman in a yellow top and shorts is sitting on the pavement in front of a building.

[H] Two goldfish are riding bikes in a giant pile of mashed potatoes.

[LABEL] contradiction [PRED] contradiction [COEFF] 9.6628

[P] People are sitting and drinking wine at tables.

[H] People throw beer cans at a red truck.

[LABEL] contradiction [PRED] contradiction [COEFF] 9.4811

[P] A jogger is making his way down a sidewalk on a nature trail.

[H] A jogger is sitting in a cafe

[LABEL] **contradiction** [PRED] **contradiction** [COEFF] 9.4754

[P] A man surfing as a boat is being driven nearby.

[H] The man is sitting drinking coffee

### 1.39 Component 38

[LABEL] **neutral** [PRED] **neutral** [COEFF] 59.5465

[P] A family is enjoying a sunny day, while laying on the green grass.

[H] The family is having a picnic

[LABEL] **neutral** [PRED] **contradiction** [COEFF] 50.6854

[P] A group of people sitting down and walking around a large rock park.

[H] A group of people are having a picnic.

[LABEL] **neutral** [PRED] **neutral** [COEFF] 46.5016

[P] A man in an orange shirt and blue pants standing underneath trees along with other people around him.

[H] The man and other people are at a picnic.

[LABEL] **neutral** [PRED] **neutral** [COEFF] 41.4466

[P] A group of adults are sitting on the ground.

[H] A group of adults having a picnic.

[LABEL] **neutral** [PRED] **neutral** [COEFF] 39.9757

[P] Children woman and man in a park looking around a park

[H] People are having a picnic in the park.

[LABEL] **contradiction** [PRED] **neutral** [COEFF] 37.1861

[P] A little boy is outside playing.

[H] A boy watches the neighbor kids play in the yard.

[LABEL] **contradiction** [PRED] **neutral** [COEFF] 35.4802

[P] A male and female hiker peer out over the mountains.

[H] The hikers are on a picnic.

[LABEL] **neutral** [PRED] **neutral** [COEFF] 35.1822

[P] This group of young adults are sitting around having a picnic in the park.

[H] People are eating sandwiches on a blanket.

[LABEL] **contradiction** [PRED] **neutral** [COEFF] 32.8805

[P] Two people walk outside in a nature area.

[H] Two people are standing beside a lake, skipping stones.



[LABEL] **contradiction** [PRED] **neutral** [COEFF] 31.0666

[P] A young boy and a young girl sitting in the grass laughing.

[H] The young people are sitting on a bench.

[LABEL] **neutral** [PRED] **neutral** [COEFF] 30.9500

[P] A group of people are relaxing on the beach with their beach chairs and snacks.

[H] A group of friends are laughing on the beach.

[LABEL] **contradiction** [PRED] **contradiction** [COEFF] 30.2643

[P] A boy dressed in jeans and a blue sweatshirt and a girl dressed in pink are hiking on a path through the woods.

[H] A boy and a girl having a picnic under a tree.

[LABEL] **neutral** [PRED] **neutral** [COEFF] 29.8949

[P] Three young children in colorful clothes are sitting on a bench close together.

[H] Some kids playing at the beach.

[LABEL] **neutral** [PRED] **neutral** [COEFF] 29.3120

[P] A small child is standing at the edge of the woods.

[H] A child is starting a nature hike.

[LABEL] **neutral** [PRED] **neutral** [COEFF] 28.1590

[P] Eight young people are sitting in a rough circle in the grass at the bottom of a slight incline with three trees in the background.

[H] A group of young people are camping.

[LABEL] **contradiction** [PRED] **contradiction** [COEFF] 28.0139

[P] The two people are crossing the river by walking on the rocks.

[H] The people are sitting down eating a picnic.

## 1.40 Component 39

[LABEL] **contradiction** [PRED] **contradiction** [COEFF] 15.7812

[P] A man is jumping on a pogo stick on the sidewalk in front of an audience.

[H] The man is sitting down

[LABEL] **contradiction** [PRED] **contradiction** [COEFF] 15.3953

[P] A woman walks on boards.

[H] A woman is sitting down.

[LABEL] **contradiction** [PRED] **contradiction** [COEFF] 15.1115

[P] A man wearing a backpack is climbing a rock.

[H] The man is sitting down.

[LABEL] **contradiction** [PRED] **contradiction** [COEFF] 14.8887

[P] Three women walking down the road with umbrellas.

[H] Three women are sitting.

[LABEL] **neutral** [PRED] **contradiction** [COEFF] 14.8659  
[P] A smiling woman rides the subway while reading a magazine, with a 'bud light' advertisement behind her.  
[H] The woman is sitting.

[LABEL] **contradiction** [PRED] **contradiction** [COEFF] 14.8182  
[P] A black and tan dog is running along a series of stone walkways spaced between grass.  
[H] The dog is sitting

[LABEL] **contradiction** [PRED] **contradiction** [COEFF] 14.8111  
[P] A man on a skateboard jumps over some obstacles.  
[H] The man is sitting down.

[LABEL] **contradiction** [PRED] **contradiction** [COEFF] 14.6508  
[P] A boy jumping on a trampoline.  
[H] A boy is sitting down

[LABEL] **contradiction** [PRED] **contradiction** [COEFF] 14.3174  
[P] A construction worker in jeans is standing on a scaffold holding on to a metal frame with a city backdrop.  
[H] The construction worker is sitting down.

[LABEL] **contradiction** [PRED] **contradiction** [COEFF] 14.2713  
[P] Boy wearing swim trunks holding goggles and running  
[H] The boy is sitting down.

[LABEL] **contradiction** [PRED] **contradiction** [COEFF] 14.2021  
[P] A man in a blue shirt is walking and talking on the phone.  
[H] A man in a blue shirt is sitting down.

[LABEL] **contradiction** [PRED] **contradiction** [COEFF] 13.7874  
[P] Two men in black are running through a forest.  
[H] The men are sitting down.

[LABEL] **contradiction** [PRED] **contradiction** [COEFF] 13.3578  
[P] A man is jumping over a pole like a hurdle.  
[H] The man is sitting down

[LABEL] **contradiction** [PRED] **contradiction** [COEFF] 13.2532  
[P] A young man and woman are dancing in a brick courtyard.  
[H] The people are sitting

[LABEL] **contradiction** [PRED] **contradiction** [COEFF] 12.3853  
[P] A dog runs and plays in the water.  
[H] The dog is sitting.

[LABEL] **contradiction** [PRED] **contradiction** [COEFF] 12.1662  
[P] Man doing a back flip into the ocean.  
[H] The man is sitting.

## 1.41 Component 40

[LABEL] **entailment** [PRED] **entailment** [COEFF] 12.0652  
[P] A little girl smiles while she presses buttons on an audio mixer.  
[H] There is a girl.

[LABEL] **entailment** [PRED] **entailment** [COEFF] 11.3931  
[P] A little kid, with a red toy, is sitting on a tire.  
[H] There is a child.

[LABEL] **entailment** [PRED] **entailment** [COEFF] 10.3825  
[P] A white dog runs across the water.  
[H] There is a dog.

[LABEL] **entailment** [PRED] **entailment** [COEFF] 10.3183  
[P] A group of people and a brown dog looking at the snow.  
[H] There is a group of people.

[LABEL] **entailment** [PRED] **entailment** [COEFF] 10.2215  
[P] A long - haired woman is singing into a microphone.  
[H] There is a woman singing.

[LABEL] **entailment** [PRED] **entailment** [COEFF] 10.0138  
[P] A woman holding a microphone and another woman playing the piano.  
[H] There is a woman.

[LABEL] **entailment** [PRED] **entailment** [COEFF] 9.9425  
[P] A little girl in a black dress smiles as she sits on santa's lap.  
[H] There is a girl.

[LABEL] **entailment** [PRED] **entailment** [COEFF] 9.9366  
[P] A woman walking over a bridge with tall grass on either side of her.  
[H] There is a person walking.

[LABEL] **entailment** [PRED] **entailment** [COEFF] 9.7079  
[P] Woman dressed in white displaying art carved from fruit.  
[H] There is a woman displaying art.

[LABEL] **entailment** [PRED] **entailment** [COEFF] 9.5777  
[P] A woman is singing in a band.  
[H] There is a woman.

[LABEL] entailment [PRED] entailment [COEFF] 9.4325  
[P] Woman with tattoos and long, flowing red dyed hair, sitting on sidewalk.  
[H] There is a woman sitting on the sidewalk.

[LABEL] entailment [PRED] entailment [COEFF] 9.3970  
[P] A group of people are passing next to a shop.  
[H] There is a group of people.

[LABEL] entailment [PRED] entailment [COEFF] 9.2380  
[P] A young man in the pool with brown hair squirting water out of his hands.  
[H] There is a man in the pool.

[LABEL] entailment [PRED] entailment [COEFF] 9.1424  
[P] A mountain biker jumping a slope outdoors in a forest area.  
[H] There's a biker

[LABEL] entailment [PRED] entailment [COEFF] 8.8950  
[P] A man standing outside on a rainy day.  
[H] There is a man outside.

[LABEL] entailment [PRED] entailment [COEFF] 8.8372  
[P] A woman riding a bicycle next to a field.  
[H] There is a woman on a bicycle.

## 1.42 Component 41

[LABEL] entailment [PRED] entailment [COEFF] 23.5354  
[P] A large amount of people walking through a park on a sunny day.  
[H] There are a lot of people in the park.

[LABEL] entailment [PRED] entailment [COEFF] 21.7399  
[P] The courtyard of a south american city with a crowd and vintage cars.  
[H] There are lots of people and vehicles.

[LABEL] entailment [PRED] entailment [COEFF] 20.9178  
[P] This dish is very tasty and i enjoy this dish  
[H] The dish is tasty.

[LABEL] entailment [PRED] entailment [COEFF] 20.6461  
[P] A boy looks over a railing at the many boats and rafts below in the water.  
[H] There are many boats and rafts in the water.

[LABEL] entailment [PRED] entailment [COEFF] 19.9442  
[P] People are walking around and a woman leans on a baby carriage while a large crowd is seen in the background.  
[H] There are a lot of people gathered.

[LABEL] **entailment**      [PRED] **entailment**      [COEFF] 19.5329  
[P] A crowded city street.  
[H] The city street is crowded.

[LABEL] **entailment**      [PRED] **entailment**      [COEFF] 18.7743  
[P] A long dinner table with rows of people talking waiting for their food.  
[H] A lot of people are waiting to have dinner

[LABEL] **entailment**      [PRED] **entailment**      [COEFF] 18.3136  
[P] Men in black hats are standing in a crowd of people.  
[H] There are many people around.

[LABEL] **entailment**      [PRED] **entailment**      [COEFF] 17.8082  
[P] A magazine stand with many multicolored magazines  
[H] The stand has many magazines

[LABEL] **entailment**      [PRED] **entailment**      [COEFF] 17.5660  
[P] A person carrying many bags.  
[H] A person is carrying a lot of bags.

[LABEL] **entailment**      [PRED] **entailment**      [COEFF] 16.5529  
[P] There is a highly populated beach with clear water.  
[H] There are a lot of people at the beach.

[LABEL] **entailment**      [PRED] **entailment**      [COEFF] 16.4817  
[P] Many people are clustered closely together, and several of them have alcohol.  
[H] A lot of people drinking.

[LABEL] **entailment**      [PRED] **entailment**      [COEFF] 16.4146  
[P] Two people walking laden down with baskets and blankets.  
[H] Two people are carrying a lot of things.

[LABEL] **entailment**      [PRED] **entailment**      [COEFF] 16.2843  
[P] A black man, dumping a bowl of meat into a grinder in a poor looking country.  
[H] The man is in a poor country.

[LABEL] **neutral**      [PRED] **entailment**      [COEFF] 16.1121  
[P] There is a wonderful spread of food on this buffet.  
[H] The food is good in this buffet

[LABEL] **entailment**      [PRED] **entailment**      [COEFF] 15.5978  
[P] People are bustling about on a crowded cobblestone road.  
[H] A large number of people are on a street.

## 1.43 Component 42

[LABEL] **neutral** [PRED] **neutral** [COEFF] 22.2022

[P] A young woman in black is standing in front of a wall with writing, she is holding something in her right hand.

[H] A woman is looking for something on a wall.

[LABEL] **neutral** [PRED] **neutral** [COEFF] 19.6709

[P] A person in a green outfit and helmet is swinging a baseball bat at a tennis ball in front of a fence.

[H] The guy wearing green is learning how to use a bat by hitting a tennis ball.

[LABEL] **neutral** [PRED] **neutral** [COEFF] 19.1788

[P] An older woman looks at the camera while young children play with many kinds of toys around the room in the background.

[H] The woman is taking care of the children.

[LABEL] **neutral** [PRED] **neutral** [COEFF] 18.9530

[P] A young man is in midair while skateboarding at a skate park with people watching him in the background.

[H] A man is doing tricks on his skateboard.

[LABEL] **neutral** [PRED] **neutral** [COEFF] 18.4037

[P] A boy looks on as a baby laughs.

[H] The boy is making the baby laugh.

[LABEL] **contradiction** [PRED] **neutral** [COEFF] 18.2292

[P] Two bike riders are riding their road bikes through a state park filled with campers and other bikers.

[H] Cyclists are waiting to start a bike ride.

[LABEL] **neutral** [PRED] **neutral** [COEFF] 18.1400

[P] A boy is riding a donkey while talking to a friend.

[H] A boy is teaching his friend how to ride a donkey.

[LABEL] **neutral** [PRED] **neutral** [COEFF] 17.7977

[P] A man is wearing jacket is in the hole.

[H] A man is trying to grab something in a hole.

[LABEL] **neutral** [PRED] **neutral** [COEFF] 17.7725

[P] A man holds up a baby in a swimming pool.

[H] A man is teaching a baby to swim.

[LABEL] **entailment** [PRED] **neutral** [COEFF] 17.7155

[P] Students are in a classroom, reading something off a paper.

[H] The students are reading together.

[LABEL] **neutral** [PRED] **neutral** [COEFF] 17.2355

[P] A couple sitting at a reception table, the man is laughing as he motions back and the woman is laughing motioning forward.

[H] The man and woman are telling a story for their guests.

[LABEL] **neutral**            [PRED] **neutral**            [COEFF] 17.2057  
[P] Two soccer players wait to compete on an outdoor field in front of a crowd of people watching in the stands in the background.  
[H] One of the players is holding a soccer ball.

[LABEL] **neutral**            [PRED] **neutral**            [COEFF] 16.3597  
[P] Man playing accordion at night by city traffic.  
[H] The man is accepting tips from the people in the traffic.

[LABEL] **neutral**            [PRED] **neutral**            [COEFF] 15.9982  
[P] A boy is inside of a vehicle.  
[H] The boy is going for a ride.

[LABEL] **neutral**            [PRED] **neutral**            [COEFF] 15.8762  
[P] Several children are raising their hands while sitting on a colorful rug in a classroom.  
[H] Several children have questions that the teacher can answer.

[LABEL] **entailment**        [PRED] **neutral**            [COEFF] 15.8079  
[P] A fluffy tan dog dropping a colourful toy.  
[H] The dog had the toy in it's mouth.

## 1.44 Component 43

[LABEL] **entailment**        [PRED] **entailment**        [COEFF] 6.5781  
[P] A silver statue of men on bikes.  
[H] The statue is silver.

[LABEL] **entailment**        [PRED] **entailment**        [COEFF] 5.6773  
[P] A band of two men playing guitars and two women are on stage.  
[H] A musical event is going on.

[LABEL] **entailment**        [PRED] **entailment**        [COEFF] 5.3878  
[P] The man is rollerblading in a red hat, blue shirt, and tan pants.  
[H] A man is skating.

[LABEL] **entailment**        [PRED] **entailment**        [COEFF] 5.3062  
[P] A snarling brown and black dog corners a brown long - haired cat under a wooden bench.  
[H] A cat and a dog in conflict.

[LABEL] **entailment**        [PRED] **entailment**        [COEFF] 5.2366  
[P] Two bears are growling at each other.  
[H] Bears in a confrontation.

[LABEL] **neutral**            [PRED] **entailment**        [COEFF] 5.0186  
[P] A young person dressed in white is running toward a ball.  
[H] A young person is playing sports.

[LABEL] **neutral** [PRED] **entailment** [COEFF] 4.9932  
 [P] A red race car with the number 56 is driving along a racetrack.  
 [H] A car is racing around the race track.

[LABEL] **entailment** [PRED] **entailment** [COEFF] 4.9014  
 [P] A young man in blue jeans and a blue tee - shirt an sunglasses is on a skateboard on pavement lined with palm trees.  
 [H] There is a young man skating.

[LABEL] **entailment** [PRED] **entailment** [COEFF] 4.9003  
 [P] A man wearing a black and green striped shirt juggling three pins on the street.  
 [H] There are jugglers in the street.

[LABEL] **entailment** [PRED] **entailment** [COEFF] 4.7302  
 [P] An asian child with a yellow bow in her hair on a swing with an asian woman standing behind her.  
 [H] A couple asian children are playing.

[LABEL] **entailment** [PRED] **entailment** [COEFF] 4.6487  
 [P] Three muzzled and numbered dogs running through the grass.  
 [H] Three dogs are running through a field

[LABEL] **entailment** [PRED] **entailment** [COEFF] 4.6450  
 [P] Two children play jenga on a wooden floor.  
 [H] Two kids are playing a game.

[LABEL] **entailment** [PRED] **entailment** [COEFF] 4.5401  
 [P] A woman in a white vest reaching for a white paper in a fish market.  
 [H] There are people at a fish market.

[LABEL] **entailment** [PRED] **entailment** [COEFF] 4.5022  
 [P] Three dogs, one holding a red frisbee, standing in snow.  
 [H] Three animals are outside.

[LABEL] **neutral** [PRED] **entailment** [COEFF] 4.3228  
 [P] A man in a black jacket pole - vaulting on the beach.  
 [H] A man is in a competition.

[LABEL] **neutral** [PRED] **entailment** [COEFF] 4.2778  
 [P] Two men are riding on horses through the street.  
 [H] Two men racing horses through the street

## 1.45 Component 44

[LABEL] **entailment** [PRED] **entailment** [COEFF] 15.6969  
 [P] A man wearing white clothes playing cricket.  
 [H] A guy is playing cricket.



[LABEL] **entailment** [PRED] **entailment** [COEFF] 15.0013  
[P] Four guys are posed on a stone platform.  
[H] Four men are on a platform.

[LABEL] **entailment** [PRED] **entailment** [COEFF] 14.8951  
[P] A male with glasses is playing a guitar with his band.  
[H] A man is playing a musical instrument.

[LABEL] **entailment** [PRED] **entailment** [COEFF] 12.9638  
[P] Three guys playing golf along a body of water.  
[H] Three men play golf near water.

[LABEL] **entailment** [PRED] **entailment** [COEFF] 12.4225  
[P] A bearded man in a long - sleeve shirt is singing with a microphone.  
[H] A guy with a beard is singing.

[LABEL] **entailment** [PRED] **entailment** [COEFF] 11.9313  
[P] Two guys wearing white uniforms playing a sport.  
[H] A pair of men are playing a sport.

[LABEL] **contradiction** [PRED] **entailment** [COEFF] 11.8836  
[P] A male in a black shirt, and black pants, working on the engine of an old, green antique automobile, with a yellow gas canister sitting on the grass.  
[H] A man is working on a car.

[LABEL] **entailment** [PRED] **entailment** [COEFF] 10.5547  
[P] An asian male focuses on building something at a workbench.  
[H] A man is working on a project.

[LABEL] **entailment** [PRED] **entailment** [COEFF] 10.3371  
[P] A man in black pants and shirt is holding a guitar and standing next to a microphone in front of a pink background.  
[H] A guy wearing black with a guitar stands in front of a pink background

[LABEL] **entailment** [PRED] **entailment** [COEFF] 10.3057  
[P] Two men are having a conversation.  
[H] Two guys talk.

[LABEL] **entailment** [PRED] **entailment** [COEFF] 9.4417  
[P] A male in a red t - shirt plays a guitar in a room full of people.  
[H] A man in room full of people plays his guitar.

[LABEL] **entailment** [PRED] **entailment** [COEFF] 9.2798  
[P] A man in a military uniform is playing the drums in a marching band.  
[H] A guy plays an instrument

[LABEL] entailment [PRED] entailment [COEFF] 9.0430  
[P] @ males wearing a black shirt and a brown shirt are looking at vegetation.  
[H] Men look at vegetation.

[LABEL] neutral [PRED] entailment [COEFF] 8.8207  
[P] Two guys breakdance on stage.  
[H] Two men are dancing.

[LABEL] entailment [PRED] entailment [COEFF] 8.2885  
[P] A guy with a sword and traditional fighting gear is getting ready for a fight.  
[H] A man has a weapon.

[LABEL] entailment [PRED] entailment [COEFF] 7.4798  
[P] A man wearing a white coat and apron is grilling sausages.  
[H] A guy is cooking food.

## 1.46 Component 45

[LABEL] entailment [PRED] contradiction [COEFF] 154.6957  
[P] Two girls with purple hair and a short - haired woman are smiling.  
[H] Three girls have hair.

[LABEL] entailment [PRED] contradiction [COEFF] 154.0813  
[P] Two white men and a black man, all wearing jeans and a black t - shirt, are sitting on a bench with sandwich and drink.  
[H] Three men are sitting on a bench.

[LABEL] entailment [PRED] contradiction [COEFF] 140.2224  
[P] Two girls with their arms holding a girl with a blue shirt and black belt around her upper body.  
[H] There are three girls.

[LABEL] entailment [PRED] entailment [COEFF] 132.6666  
[P] Two women and a man are eating beans and rice off of large leaves.  
[H] Three people are eating off of large leaves.

[LABEL] entailment [PRED] contradiction [COEFF] 129.3697  
[P] Two adults and a little boy sit on a homey exterior porch in front of an exotic flora and fauna nature scene.  
[H] Three people sit on a porch.

[LABEL] entailment [PRED] entailment [COEFF] 125.8880  
[P] A man and two women are sitting on the beach, the man is wearing a watch and talking on his phone, while the women are building sand castles.  
[H] Three people are sitting on the beach.

[LABEL] entailment [PRED] entailment [COEFF] 125.7845  
[P] Two younger women and an older man in a red sweatshirt are walking across a crosswalk in san francisco.

[H] Three people walk across a crosswalk.

[LABEL] **entailment** [PRED] **contradiction** [COEFF] 115.2218

[P] Two white teenage girls are jumping on a trampoline while one does a back flip.

[H] There are three girls on the trampoline.

[LABEL] **entailment** [PRED] **entailment** [COEFF] 109.5858

[P] Two men in karate uniforms, one with red gloves and belt and the other with blue gloves and belt, box, while the man in blue is making a face as if he were screaming.

[H] Three men are wearing karate gear.

[LABEL] **entailment** [PRED] **entailment** [COEFF] 106.9930

[P] Two women and 1 man give a man bunny ears as they pose for photo.

[H] Three people pose for a photo

[LABEL] **contradiction** [PRED] **contradiction** [COEFF] 99.8835

[P] A skateboarder flies through the air while two people observe from a tall viewing post.

[H] Three people ride one skateboard.

[LABEL] **entailment** [PRED] **entailment** [COEFF] 95.8795

[P] A black dog is followed by two brown dogs over sand.

[H] Three dogs are walking on sand.

[LABEL] **entailment** [PRED] **entailment** [COEFF] 95.2047

[P] Two girls and a guy walk by large advertisement of man with no shirt on.

[H] Three people walk by a large advertisement.

[LABEL] **entailment** [PRED] **entailment** [COEFF] 89.7218

[P] A middle - aged man holds a camera while he and two other men cross a street.

[H] Three men are on the street.

[LABEL] **entailment** [PRED] **contradiction** [COEFF] 86.3116

[P] 2 guys and a woman riding on a subway watching something funny.

[H] Three people are riding on a subway.

[LABEL] **contradiction** [PRED] **contradiction** [COEFF] 85.6404

[P] Two construction workers operate a machine that steams the street.

[H] A machine is being run by three people.

## 1.47 Component 46

[LABEL] **contradiction** [PRED] **contradiction** [COEFF] 12.1593

[P] A woman in a striped shirt folds her arms while standing in a grocery store.

[H] A man is outside.

[LABEL] **contradiction** [PRED] **contradiction** [COEFF] 11.8839

[P] A woman sits in a chair and smiles while holding a sleeping baby.

[H] A man is holding a baby.

[LABEL] contradiction [PRED] contradiction [COEFF] 11.3589

[P] This woman is at a marketplace weighing in what she picked

[H] A man is drafting blueprints.

[LABEL] contradiction [PRED] contradiction [COEFF] 11.0490

[P] A woman wearing sunglasses and a flowered shirt looks to the left.

[H] There is a man in a red coat.

[LABEL] contradiction [PRED] contradiction [COEFF] 10.8286

[P] A woman posed in a field of grass wearing red shoes and a white dress.

[H] A man is reading a newspaper.

[LABEL] contradiction [PRED] contradiction [COEFF] 9.9448

[P] The woman is holding the harness that the brown and white dog is wearing.

[H] The man is walking a dog.

[LABEL] contradiction [PRED] contradiction [COEFF] 9.6674

[P] A woman in a white hat looking at her scarf.

[H] A man plays the tuba.

[LABEL] contradiction [PRED] contradiction [COEFF] 9.6593

[P] A woman with a tattoo sits with a pair of yellow tinted sunglasses on her multicolored hair.

[H] A man is pictured

[LABEL] contradiction [PRED] contradiction [COEFF] 9.4828

[P] A smiling female with nice teeth taking a bubble bath, two earrings in her right ear and a short haircut.

[H] A man is sitting at a desk, in an office building.

[LABEL] contradiction [PRED] contradiction [COEFF] 8.9579

[P] A girl doing back flips on grass.

[H] The man is napping

[LABEL] contradiction [PRED] contradiction [COEFF] 8.5557

[P] A woman with short hair holds a small baby in her arms.

[H] A man holds a baby.

[LABEL] contradiction [PRED] contradiction [COEFF] 8.4211

[P] A lady jumping on a trampoline with rolling mountains in the background.

[H] A man playing chess

[LABEL] contradiction [PRED] contradiction [COEFF] 8.2818

[P] A woman in blue looks in a black leather bag while sitting on a bench during a sunny afternoon while people and limousines passed behind her.

[H] A man is driving a small car while it's raining.

[LABEL] **contradiction** [PRED] **contradiction** [COEFF] 8.0233

[P] A trio of women juggling wearing white outfits with angel wings

[H] A man is playing tennis.

[LABEL] **contradiction** [PRED] **contradiction** [COEFF] 7.6781

[P] A woman plays with a baby wearing a blue hooded sweatshirt and lying on a patterned rug.

[H] A man feeds his fish

[LABEL] **contradiction** [PRED] **contradiction** [COEFF] 7.6137

[P] A woman in a red shirt is sitting on the edge of a high cliff.

[H] A man fiddling.

## 1.48 Component 47

[LABEL] **contradiction** [PRED] **contradiction** [COEFF] 24.1839

[P] A man on a bicycle is riding through a courtyard.

[H] The man is on a horse

[LABEL] **contradiction** [PRED] **contradiction** [COEFF] 22.8107

[P] Two young boys riding a bicycle.

[H] Boys are riding a horse.

[LABEL] **contradiction** [PRED] **contradiction** [COEFF] 19.8815

[P] A person is riding a bike on a dirt road.

[H] The person rode a horse.

[LABEL] **contradiction** [PRED] **contradiction** [COEFF] 19.3722

[P] A man driving a motorcycle and towing a load.

[H] A man on a horse.

[LABEL] **contradiction** [PRED] **contradiction** [COEFF] 18.1665

[P] A person riding a dirt bike is surrounded by green grass and trees.

[H] A person is riding a horse outside.

[LABEL] **contradiction** [PRED] **contradiction** [COEFF] 13.0585

[P] A police officer rides a motorcycle in a parade on a sunny day.

[H] A horse cop is galloping in the rain

[LABEL] **entailment** [PRED] **contradiction** [COEFF] 11.6072

[P] Man with striped shirt on standing next to his motorcycle.

[H] This guy proudly stands by his iron horse.

[LABEL] **contradiction** [PRED] **contradiction** [COEFF] 11.4619

[P] Many people wearing silver leotards are riding bikes on the street.

[H] A group of people wearing cowboy hats riding horses in a parade.

[LABEL] **contradiction** [PRED] **contradiction** [COEFF] 10.9767

[P] Two girls riding on swings.

[H] Two girls ride horses.

[LABEL] **contradiction** [PRED] **contradiction** [COEFF] 10.5684

[P] Older african man about to mount a an old bicycle in an urban environment.

[H] Man getting on his motorcycle.

[LABEL] **contradiction** [PRED] **contradiction** [COEFF] 10.4486

[P] A man and a woman are leading two cows pulling a cart.

[H] A man riding a horse.

[LABEL] **contradiction** [PRED] **contradiction** [COEFF] 9.3601

[P] A man is dancing with a dog between his legs.

[H] A man is riding a horse.

[LABEL] **contradiction** [PRED] **contradiction** [COEFF] 8.6787

[P] A man sitting on a fake airplane during a rodeo.

[H] A man is riding a horse.

[LABEL] **contradiction** [PRED] **contradiction** [COEFF] 8.6752

[P] Girl wearing a hat and holding her bike talks to her friend.

[H] Two children are riding on a horse through the pasture.

[LABEL] **contradiction** [PRED] **contradiction** [COEFF] 8.0180

[P] Black dog jumping bar in obstacle course

[H] A horse jumping over a fence.

[LABEL] **contradiction** [PRED] **contradiction** [COEFF] 7.4335

[P] A young girl is playing baseball and is striking out.

[H] A young girl is riding a horse

## 1.49 Component 48

[LABEL] **entailment** [PRED] **entailment** [COEFF] 13.0164

[P] A baby girl, wearing a white sweater, pink blouse, blue pants, and black shoes, is sitting on a green and white striped blanket on grass.

[H] The baby is sitting on a blanket in the grass.

[LABEL] **entailment** [PRED] **entailment** [COEFF] 12.8722

[P] A man in a brown jacket looking off to the side

[H] A person with his head turned.

[LABEL] **entailment** [PRED] **entailment** [COEFF] 12.1749

[P] Three children, including a boy in a green - striped shirt and a girl in a pink shirt, explore a large pile of wood.

[H] Three children play on a large pile of wood.

[LABEL] **entailment** [PRED] **entailment** [COEFF] 12.1358

[P] A man in glasses and a blue shirt reading a laptop screen.

[H] A man is on his computer.

[LABEL] **contradiction** [PRED] **entailment** [COEFF] 11.9868

[P] A man in a blue shirt riding a motorcycle in japan.

[H] The man is in a

[LABEL] **neutral** [PRED] **entailment** [COEFF] 11.6080

[P] This gentleman in a white shirt, is really studying, at his computer.

[H] The man in white sits at the computer.

[LABEL] **entailment** [PRED] **entailment** [COEFF] 11.5568

[P] A basketball player in a white jersey with the word price on it, posting up against another player in a blue uniform.

[H] A player dressed in white

[LABEL] **entailment** [PRED] **entailment** [COEFF] 9.9544

[P] A young boy wearing a white shirt with " frog! " printed in red, turns the pages of a book he is holding.

[H] A young boy is holding a book

[LABEL] **neutral** [PRED] **entailment** [COEFF] 9.8785

[P] A crowd of protesters in the street holding up peace signs an holding signs saying " stop killing in iran. "

[H] People are protesting against war in iran.

[LABEL] **entailment** [PRED] **entailment** [COEFF] 9.7018

[P] A person in a purple shirt rubs their eyes under their glasses as the stand in front of a red and yellow bus.

[H] A person is standing in front of a bus

[LABEL] **entailment** [PRED] **entailment** [COEFF] 9.6947

[P] Two young children, one wearing a blue shirt and something on their head climbing a tree standing in front of a body of water.

[H] The two young children are by a body of water.

[LABEL] **entailment** [PRED] **entailment** [COEFF] 9.5118

[P] A closeup of a brown dog with his tongue out.

[H] A dog.

[LABEL] **neutral** [PRED] **entailment** [COEFF] 9.2120

[P] A man in jeans, a jacket and a hat is holding an open newspaper while walking.

[H] The moving person is reading something.

[LABEL] **entailment**      [PRED] **entailment**      [COEFF] 9.1352  
 [P] A blond woman wearing shorts is on a farm with two animals, pulling hay.  
 [H] A woman is working outdoors.

[LABEL] **neutral**      [PRED] **entailment**      [COEFF] 9.0117  
 [P] An elderly man in a black sweatshirt doing cement work.  
 [H] The old man is pouring concrete.

[LABEL] **entailment**      [PRED] **entailment**      [COEFF] 8.9660  
 [P] Two men in yellow life jackets, one wearing sunglasses, are sitting in a moving motor boat.  
 [H] Two men on a boat

## 1.50 Component 49

[LABEL] **neutral**      [PRED] **neutral**      [COEFF] 36.1999  
 [P] A man in a white shirt is walking by a large blue bus.  
 [H] A man is about to get on the bus.

[LABEL] **neutral**      [PRED] **entailment**      [COEFF] 31.8903  
 [P] The number 90 blue race car is sitting on the track.  
 [H] A car is getting ready to race.

[LABEL] **neutral**      [PRED] **neutral**      [COEFF] 30.9280  
 [P] Four people are sitting behind a table full of food.  
 [H] People are about to eat

[LABEL] **neutral**      [PRED] **neutral**      [COEFF] 30.4093  
 [P] Older man standing next to a green, yellow and white taxi.  
 [H] Older man about to get into a taxi.

[LABEL] **neutral**      [PRED] **neutral**      [COEFF] 30.2296  
 [P] An individual with a hat is holding some sort of fruit.  
 [H] A person is going to eat a fruit.

[LABEL] **neutral**      [PRED] **entailment**      [COEFF] 29.5672  
 [P] A boy is wearing a baseball mitt and holding a baseball.  
 [H] A boy is about to play baseball.

[LABEL] **entailment**      [PRED] **entailment**      [COEFF] 29.3877  
 [P] A man is standing with his arms crossed at a train station.  
 [H] A man is waiting on a train.

[LABEL] **neutral**      [PRED] **entailment**      [COEFF] 27.1282  
 [P] A little boy wearing a vest, floaties and goggles, swims to the side of a pool.  
 [H] A boy is learning to swim.



[LABEL] **neutral** [PRED] **neutral** [COEFF] 27.0187

[P] A woman in a market gestures to a hat, while a child reaches for the hat.

[H] A woman is buying a hat for her child.

[LABEL] **neutral** [PRED] **entailment** [COEFF] 27.0047

[P] A man wearing a white shirt, gold cross, and a cowboy hat is standing in front of a roller coaster.

[H] A man waits to ride a roller coaster.

[LABEL] **neutral** [PRED] **neutral** [COEFF] 26.4847

[P] A crowd of people are standing on the side of the street while a man in a blue hat is talking to a taxi driver.

[H] People are waiting for a taxi.

[LABEL] **neutral** [PRED] **entailment** [COEFF] 25.7901

[P] A young man stands on a sidewalk between a newspaper dispenser and a trashcan, with a bus in the background.

[H] A young man waits for a bus

[LABEL] **neutral** [PRED] **neutral** [COEFF] 25.2241

[P] A man in a black and gray hoodie stands next to a guy in a black uniform who prepares food at a buffet.

[H] A man wearing a hoodie is waiting to be served at the buffet.

[LABEL] **neutral** [PRED] **neutral** [COEFF] 25.0787

[P] A lady is holding a blue swimming tub on the side of a street in front of a red bus.

[H] A woman is getting ready to go swimming

[LABEL] **neutral** [PRED] **entailment** [COEFF] 24.9917

[P] Three people sitting on a bus stop bench.

[H] Three people are waiting for a bus.

[LABEL] **neutral** [PRED] **entailment** [COEFF] 24.7140

[P] Lady with gray hair using cellphone and carrying a shopping bag in front of a boutique.

[H] A lady is getting ready to shop in a boutique.

## 1.51 Component 50

[LABEL] **contradiction** [PRED] **contradiction** [COEFF] 13.2774

[P] A young man with black hair, in a white t - shirt, black shorts with red and blue stripes along the side, jogging along a wire fence.

[H] A man with black hair is sitting in the kitchen eating bacon.

[LABEL] **contradiction** [PRED] **contradiction** [COEFF] 12.1064

[P] A man in a blue shirt and orange shorts looks on at a small child wearing a yellow shirt and blue shorts with trees comprising the backdrop.

[H] A man is sleeping.

[LABEL] contradiction [PRED] contradiction [COEFF] 11.9043

[P] A man with a beard who wears a black knit hat and a gray vest stands by a building.

[H] A man is standing on his head in a kitchen.

[LABEL] contradiction [PRED] contradiction [COEFF] 11.7063

[P] A biker wearing a white helmet and black clothes races down a wood bridge

[H] A biker on the roof of his house.

[LABEL] contradiction [PRED] contradiction [COEFF] 11.6383

[P] Man in jacket and striped shirt in front of a river.

[H] A man is walking down a hallway.

[LABEL] contradiction [PRED] contradiction [COEFF] 11.1023

[P] A man in a sleeveless brown shirt and khaki shorts sews on a piece of cloth covering a ramshackle shade structure.

[H] A man tearing down window curtains.

[LABEL] contradiction [PRED] contradiction [COEFF] 11.0135

[P] A little girl wearing a pink jacket and snow pants, makes a snow angel on the cement.

[H] The little girl is standing on the beach in a swimsuit.

[LABEL] contradiction [PRED] contradiction [COEFF] 10.8955

[P] A man in a tie - dyed shirt walks in front of a nail salon.

[H] A man is enjoying a meal at home with his family.

[LABEL] contradiction [PRED] contradiction [COEFF] 10.5454

[P] A man with white shirt and blue jeans pushing a truck with a picture of a woman edwards saying real colors never dye

[H] A man is eating tacos by the seashore.

[LABEL] contradiction [PRED] contradiction [COEFF] 10.0855

[P] A young man with a mohawk haircut leaning on a chain while holding some portraits.

[H] A young man is playing the piano

[LABEL] contradiction [PRED] contradiction [COEFF] 9.8909

[P] A shirtless black man wearing sunglasses and jogging pants along a park path near a waterway.

[H] A man eating food at street stall.

[LABEL] contradiction [PRED] contradiction [COEFF] 9.6502

[P] Two dogs holding red balls in their mouth, running in the snow.

[H] A dog sleeping on a bed in front of a fireplace.

[LABEL] contradiction [PRED] contradiction [COEFF] 9.0038

[P] A woman wearing a heart - shaped necklace and a blue shirt is next to a fence.

[H] The woman is on the hood of her truck.

[LABEL] contradiction [PRED] contradiction [COEFF] 8.9769

[P] A girl in a blue shirt sits in a salon chair getting her hair done by the stylist.  
[H] The girl is at home cooking dinner.

[LABEL] contradiction [PRED] contradiction [COEFF] 8.7631

[P] A brown and white dog is playing with a toy in a field of green grass and clover.  
[H] A dog is licking a child in the kitchen.

[LABEL] contradiction [PRED] contradiction [COEFF] 8.7515

[P] A woman in a red shirt and denim skirt takes a photograph of a sculpture that is surrounded by construction fences.  
[H] A woman is eating hay.

## 1.52 Component 51

[LABEL] contradiction [PRED] contradiction [COEFF] 16.3888

[P] A young man wearing a white bandanna and top and blue towel over him is lying on the grass surrounded by 5 uniformed people.  
[H] The man is lying in sand on the beach.

[LABEL] contradiction [PRED] contradiction [COEFF] 15.1604

[P] The little girl sits on top of a rock.  
[H] The young girl stands on the grass.

[LABEL] contradiction [PRED] contradiction [COEFF] 14.2966

[P] A child in a yellow dress sits on the rocks.  
[H] The kid is standing on the grass.

[LABEL] contradiction [PRED] contradiction [COEFF] 13.3738

[P] A black and white dog is wearing a red collar whilst walking on the grass.  
[H] A dog is rolling around in the sand.

[LABEL] contradiction [PRED] contradiction [COEFF] 13.1204

[P] The young man leaps to serve the volleyball on the beach.  
[H] The man is running on grass.

[LABEL] contradiction [PRED] contradiction [COEFF] 11.8379

[P] A man, lying on the grass, hand outstretched to another arm.  
[H] Man lying on a sidewalk, staring at the sky.

[LABEL] contradiction [PRED] contradiction [COEFF] 11.7054

[P] A girl in a pink jacket is walking through a large puddle.  
[H] A girl runs through grass.

[LABEL] contradiction [PRED] contradiction [COEFF] 11.5503

[P] A large brown horse stands over a small black colt that is kneeling on the sand.  
[H] The horses are in a grassy field.

[LABEL] **contradiction** [PRED] **contradiction** [COEFF] 11.4017  
[P] A young girl in blue shirt and denim shorts, pulling on a rope, standing in a pit of mud.  
[H] The girl is standing in grass.

[LABEL] **contradiction** [PRED] **contradiction** [COEFF] 10.9340  
[P] A falcon pursues a small rodent as it flees through the grass.  
[H] A falcon resting in a tree.

[LABEL] **contradiction** [PRED] **contradiction** [COEFF] 10.5257  
[P] A dog is on a leash by a tree  
[H] A dog is running in a field.

[LABEL] **contradiction** [PRED] **contradiction** [COEFF] 9.6372  
[P] Young boy in a red shirt playing near water.  
[H] The boy is standing on a field.

[LABEL] **contradiction** [PRED] **contradiction** [COEFF] 9.4864  
[P] A black dog circumvents a wooden fence in a snowy yard.  
[H] A dog is in a grassy field.

[LABEL] **contradiction** [PRED] **contradiction** [COEFF] 9.4184  
[P] A crowd of women and men gather under umbrellas in the street.  
[H] People are on the grass

[LABEL] **contradiction** [PRED] **contradiction** [COEFF] 9.0801  
[P] A black dog running along the water  
[H] The dog lays down on the grass.

[LABEL] **contradiction** [PRED] **contradiction** [COEFF] 9.0262  
[P] A gray dog runs along the green grass.  
[H] A dog walks on the beach.

### 1.53 Component 52

[LABEL] **entailment** [PRED] **entailment** [COEFF] 15.8718  
[P] On a deck, a group of people gather around a glass table.  
[H] People gathering.

[LABEL] **entailment** [PRED] **entailment** [COEFF] 15.0512  
[P] Two people embrace outside of a red car at night in a brightly - lit city.  
[H] Two people hugging.

[LABEL] **entailment** [PRED] **entailment** [COEFF] 15.0380  
[P] A small child jumps high above a sandy field.  
[H] A child jumps.

[LABEL] entailment [PRED] entailment [COEFF] 13.2968  
[P] A man eats food on a table in front of a small food shop on the street while a passerby walks by.  
[H] A man eats food.

[LABEL] entailment [PRED] entailment [COEFF] 11.9627  
[P] People are looking at children's toys in a store.  
[H] The people look at toys.

[LABEL] entailment [PRED] entailment [COEFF] 11.7904  
[P] A young girl plays in a fountain on a sunny day.  
[H] A girl plays.

[LABEL] entailment [PRED] entailment [COEFF] 11.5334  
[P] A policeman on a white horse are patrolling the streets of the city.  
[H] A policeman patrolling.

[LABEL] entailment [PRED] entailment [COEFF] 10.9611  
[P] A blond woman walks through shoulder - high pink tulips, in front of a green field with a small house and trees in the distance.  
[H] A blond woman walks.

[LABEL] entailment [PRED] entailment [COEFF] 10.7818  
[P] People are eating with an american flag in the back.  
[H] The people are eating.

[LABEL] entailment [PRED] entailment [COEFF] 10.7756  
[P] Children play in a water sculpture on the sidewalk.  
[H] Kids playing.

[LABEL] entailment [PRED] entailment [COEFF] 10.7178  
[P] People taking pictures of bicyclists biking past.  
[H] People are taking pictures.

[LABEL] entailment [PRED] entailment [COEFF] 10.6733  
[P] A choir singing with the soloist out front and the conductor in a black and white dress.  
[H] A choir singing.

[LABEL] entailment [PRED] entailment [COEFF] 10.5869  
[P] A street busker wearing a top hat is performing with fire in front of a large crowd, some seated and some standing.  
[H] A busker performs.

[LABEL] entailment [PRED] entailment [COEFF] 10.5747  
[P] Two men in baseball hats and bright yellow shirts work behind a fence.  
[H] Two men work.

[LABEL] entailment [PRED] entailment [COEFF] 10.5569  
[P] A woman is cleaning the kitchen of an apartment.  
[H] A woman is cleaning.

[LABEL] entailment [PRED] entailment [COEFF] 10.4539  
[P] A young woman fishing off a dock at sunset.  
[H] Woman fishing.

## 1.54 Component 53

[LABEL] contradiction [PRED] contradiction [COEFF] 5.3896  
[P] An excavator working at a construction site.  
[H] A guy is milking a cow.

[LABEL] contradiction [PRED] contradiction [COEFF] 5.3023  
[P] A hair designer working during renovations.  
[H] A worker picks fruit.

[LABEL] contradiction [PRED] contradiction [COEFF] 4.7503  
[P] Basketball player tries to get around a defender, in red.  
[H] A cat is sitting on the roof

[LABEL] contradiction [PRED] contradiction [COEFF] 4.6898  
[P] A man driving what looks to be a makeshift rickshaw.  
[H] A person in a bathtub.

[LABEL] contradiction [PRED] contradiction [COEFF] 4.4976  
[P] A person riding a bike on a snowy road.  
[H] A girl kayaks down a river.

[LABEL] contradiction [PRED] contradiction [COEFF] 4.4583  
[P] A person sitting in an airplane display.  
[H] A man is driving a truck.

[LABEL] contradiction [PRED] contradiction [COEFF] 4.3726  
[P] A runner competes in a marathon.  
[H] A legless man lays in bed alone.

[LABEL] contradiction [PRED] contradiction [COEFF] 4.3716  
[P] A kid wearing a red outfit and sandals in the bed of a dirty pickup truck.  
[H] A man driving a race car

[LABEL] contradiction [PRED] contradiction [COEFF] 4.2308  
[P] A skateboarder gets airtime.  
[H] A biker bunny - hopping off a ledge.

[LABEL] contradiction [PRED] contradiction [COEFF] 4.2189

[P] A person wrapped in wrapping paper and tinsel.

[H] A woman is wearing her bathrobe and curling her hair while looking in the mirror.

[LABEL] contradiction [PRED] contradiction [COEFF] 4.1862

[P] A person in face paint and an orange oversized cowboy hat rides his bike on a trail.

[H] A skinny woman is walking her dog on the street

[LABEL] contradiction [PRED] contradiction [COEFF] 4.1044

[P] A dig is trekking through snow.

[H] A dog walking through san diego.

[LABEL] contradiction [PRED] contradiction [COEFF] 4.0740

[P] Street performer standing outside of a clothing store.

[H] A tourist stands outside a bank

[LABEL] contradiction [PRED] contradiction [COEFF] 4.0495

[P] A bmx rider on the trail.

[H] A person is running a marathon.

[LABEL] contradiction [PRED] contradiction [COEFF] 4.0264

[P] A runner running down the road.

[H] A person taking a nap under a tree

[LABEL] contradiction [PRED] contradiction [COEFF] 4.0130

[P] A young man wearing an " ozzy " shirt is staring at some eggs and toast sitting on the table.

[H] A person is walking on the sidewalk.

## 1.55 Component 54

[LABEL] neutral [PRED] neutral [COEFF] 28.8562

[P] A woman stands along a street, hidden by her parasol.

[H] The woman's parasol is yellow.

[LABEL] neutral [PRED] neutral [COEFF] 28.0161

[P] A little boy sits on a rock and plays with leaves.

[H] The leaf is brown.

[LABEL] neutral [PRED] neutral [COEFF] 27.8503

[P] A man wearing a cowboy hat standing next to a trailer in between very tall buildings at sunset.

[H] The cowboy hat is black.

[LABEL] neutral [PRED] neutral [COEFF] 27.7587

[P] A man planting some flowers around a pole outside.

[H] The flowers are yellow.

[LABEL] **neutral**            [PRED] **neutral**            [COEFF] 25.9643  
[P] A young girl lights candles next to a woman with closed eyes with her hands folded in front of her face.  
[H] The candles are white.

[LABEL] **neutral**            [PRED] **neutral**            [COEFF] 25.3187  
[P] A little girl wears her helmet while she rides her bike.  
[H] The helmet is pink

[LABEL] **neutral**            [PRED] **neutral**            [COEFF] 25.1319  
[P] Young boy brushing a baby's hair.  
[H] The baby's hair is brown.

[LABEL] **neutral**            [PRED] **neutral**            [COEFF] 24.6395  
[P] Three men inspecting a bicycle on a street.  
[H] The bicycle is red.

[LABEL] **neutral**            [PRED] **neutral**            [COEFF] 24.2253  
[P] Two men are riding on horses through the street.  
[H] The horses are brown and white.

[LABEL] **neutral**            [PRED] **neutral**            [COEFF] 24.1366  
[P] Two older men roll out a huge ball as a crowd watches and takes pictures  
[H] The huge ball is white.

[LABEL] **neutral**            [PRED] **neutral**            [COEFF] 23.0597  
[P] Two men are walking on the street in front of a subway stop, and one has his umbrella opened and at his side.  
[H] The umbrella is yellow.

[LABEL] **neutral**            [PRED] **neutral**            [COEFF] 22.9031  
[P] A young boy fixes his bike.  
[H] The bike is yellow.

[LABEL] **neutral**            [PRED] **neutral**            [COEFF] 22.5690  
[P] A dog running through the water right toward the camera.  
[H] The dog has long hair.

[LABEL] **neutral**            [PRED] **neutral**            [COEFF] 21.9392  
[P] Three people stand, ready to ski, next to a no skiing sign.  
[H] The sign is yellow.

[LABEL] **neutral**            [PRED] **neutral**            [COEFF] 21.0122  
[P] An oriental woman who is wearing a hat walks down the busy street.  
[H] The woman's hat is yellow.

[LABEL] **neutral**            [PRED] **neutral**            [COEFF] 19.2162



[P] Little boy in a robe sits in a chair posing for the camera.  
[H] The boy's robe is blue.

## 1.56 Component 55

[LABEL] **neutral** [PRED] **neutral** [COEFF] 62.5354  
[P] A young man wearing a red pokemon shirt carrying a small red box  
[H] The man likes pokemon.

[LABEL] **entailment** [PRED] **neutral** [COEFF] 61.5049  
[P] A lone woman walks in the surf at the beach.  
[H] The woman likes going on walks at the beach.

[LABEL] **neutral** [PRED] **neutral** [COEFF] 61.1892  
[P] A young hispanic woman in a pink tank top is painting.  
[H] The woman likes pink paint

[LABEL] **neutral** [PRED] **neutral** [COEFF] 57.9304  
[P] A mother and children is fishing on a boardwalk at night.  
[H] The mother enjoys fishing with her kids.

[LABEL] **neutral** [PRED] **neutral** [COEFF] 57.5599  
[P] Man wearing a hat with an nba logo and a black leather jacket reading a book while waiting for the subway.  
[H] The man likes the nba.

[LABEL] **neutral** [PRED] **neutral** [COEFF] 57.0653  
[P] A young boy in hawaiian style swim trunks holds a plastic bucket and shovel on the shore of the ocean.  
[H] A young boy likes the ocean

[LABEL] **neutral** [PRED] **neutral** [COEFF] 55.2350  
[P] A young boy in a blue and white uniform is up to bat at a baseball game.  
[H] The boy enjoys baseball.

[LABEL] **neutral** [PRED] **neutral** [COEFF] 53.1661  
[P] A toddler is staring into the screen of a brightly colored orange and yellow video game in what appears to be a game center.  
[H] The toddler likes to play games.

[LABEL] **neutral** [PRED] **neutral** [COEFF] 52.9338  
[P] A man in a green shirt is making a cup of coffee.  
[H] The man enjoys coffee.

[LABEL] **neutral** [PRED] **neutral** [COEFF] 50.2326  
[P] A man in a white shirt with green oven mitts grilling fish on a gas bar - b - que.  
[H] The man enjoys eating fish.

[LABEL] **neutral** [PRED] **neutral** [COEFF] 49.3182

[P] Two men are participating in a karate match.

[H] Two men enjoy doing karate.

[LABEL] **neutral** [PRED] **neutral** [COEFF] 48.9385

[P] Children are playing 3 on 3 ping - pong in a gym.

[H] Children are enjoying playing ping pong.

[LABEL] **neutral** [PRED] **neutral** [COEFF] 48.3386

[P] A boy stands on a black bench.

[H] A boy likes to stand

[LABEL] **neutral** [PRED] **neutral** [COEFF] 47.5854

[P] A young boy sits in a chair in a bookstore reading a book.

[H] The boy likes reading.

[LABEL] **neutral** [PRED] **neutral** [COEFF] 47.2335

[P] Two children playing at a beach, one in pink, drawing in the sand and the second child, in green, standing in the water.

[H] The two children like playing at the beach.

[LABEL] **neutral** [PRED] **neutral** [COEFF] 47.0976

[P] A small boy is watching a musician play guitar.

[H] The boy likes listening to guitar music.

## 1.57 Component 56

[LABEL] **entailment** [PRED] **entailment** [COEFF] 10.8018

[P] A man in a hot spring tub smiling with no shirt.

[H] A man not wearing a shirt.

[LABEL] **entailment** [PRED] **entailment** [COEFF] 9.8718

[P] A silver car goes out of control on a racetrack.

[H] A car goes loses control on the track.

[LABEL] **entailment** [PRED] **entailment** [COEFF] 9.4439

[P] A baby sleeping and sucking his finger.

[H] A baby is not awake.

[LABEL] **entailment** [PRED] **entailment** [COEFF] 8.9896

[P] A woman with a taupe colored shirt looking down.

[H] A woman looks downward.

[LABEL] **entailment** [PRED] **entailment** [COEFF] 8.6741

[P] Person crossing a bridge in dim light.

[H] A person crosses dimly lit bridge.

[LABEL] entailment [PRED] entailment [COEFF] 7.3619  
[P] A shirtless man sitting on a bench fiddles with something in his hand.  
[H] A man without a shirt on fiddles with something in his hand.

[LABEL] entailment [PRED] entailment [COEFF] 7.3236  
[P] A shirtless man is walking through a tunnel of people.  
[H] There is a man without a shirt.

[LABEL] entailment [PRED] entailment [COEFF] 7.1001  
[P] A shirtless man is riding a motorcycle.  
[H] The man has no shirt on.

[LABEL] entailment [PRED] entailment [COEFF] 6.8930  
[P] A man sleeps on the porch of a dilapidated yellow building.  
[H] A man is sleeping outside.

[LABEL] entailment [PRED] entailment [COEFF] 6.6176  
[P] Cannot see picture to describe.  
[H] The picture cannot be described.

[LABEL] entailment [PRED] entailment [COEFF] 6.2911  
[P] A shoeless man sitting on the curb holding a bag.  
[H] A man has no shoes on.

[LABEL] entailment [PRED] entailment [COEFF] 6.1595  
[P] A lady is taking the shoes off of the young girl she is carrying.  
[H] A lady is removing a girl's shoes.

[LABEL] entailment [PRED] entailment [COEFF] 6.1203  
[P] A child in a sweatshirt and jean skirt squatting.  
[H] A child is not standing.

[LABEL] entailment [PRED] entailment [COEFF] 5.9225  
[P] A toddler has her eyes shut, looking as if she is thinking about something.  
[H] A young child has their eyes closed.

[LABEL] entailment [PRED] entailment [COEFF] 5.9210  
[P] A little brown dog has a ball in its mouth.  
[H] A small dog holds a ball with its mouth.

[LABEL] entailment [PRED] entailment [COEFF] 5.7837  
[P] Girl gets all her fingers cutoff trying to catch a frisbee, fail!  
[H] A girl lost her fingers!

## 1.58 Component 57

[LABEL] entailment [PRED] entailment [COEFF] 15.5870

[P] A man in a brown jacket sitting alone reading the paper.

[H] A man reads a newspaper.

[LABEL] entailment [PRED] entailment [COEFF] 12.5606

[P] A young man blasts out the pool water wearing a pair of goggles on his face.

[H] A man is swimming with goggles on

[LABEL] entailment [PRED] entailment [COEFF] 11.7397

[P] A busy city scene with colorful lighted buildings and a lot of people walking on the street.

[H] A crowd of people are walking outside.

[LABEL] neutral [PRED] entailment [COEFF] 10.9063

[P] Little girl looking through a camera.

[H] The little girl is taking photos.

[LABEL] entailment [PRED] entailment [COEFF] 10.8963

[P] A group of people sitting around a desk.

[H] The people are gathered around the desk.

[LABEL] neutral [PRED] entailment [COEFF] 10.8698

[P] A woman with brown curly hair riding on some sort of public transportation.

[H] A woman with brown hair is on the bus.

[LABEL] entailment [PRED] entailment [COEFF] 10.8061

[P] Children in a green classroom are raising their hands.

[H] Kids are raising their hands in class.

[LABEL] entailment [PRED] entailment [COEFF] 10.7975

[P] An african - american man is standing outside around other people getting ready to throw a dart.

[H] People stand by as a black man is preparing to throw a dart.

[LABEL] entailment [PRED] entailment [COEFF] 10.5826

[P] Two men posing for a piece in front of snowcapped mountains.

[H] Two men are taking a picture.

[LABEL] entailment [PRED] entailment [COEFF] 10.5787

[P] This picture is a strange combination of old times and present day.

[H] This is a photograph.

[LABEL] entailment [PRED] entailment [COEFF] 10.5737

[P] A few people on a canoe in the water.

[H] Some people are boating.

[LABEL] entailment [PRED] entailment [COEFF] 10.5286

[P] Two young girls at the beach.  
[H] Two young teen girls are at the beach.

[LABEL] **neutral** [PRED] **entailment** [COEFF] 10.5035  
[P] A man is carrying a little girl on his shoulders.  
[H] He is carrying his daughter around.

[LABEL] **neutral** [PRED] **entailment** [COEFF] 10.4791  
[P] Black man in red shorts and white shirt standing the doorway of a red house.  
[H] A man is in the doorway of his home.

[LABEL] **entailment** [PRED] **entailment** [COEFF] 10.4010  
[P] People are gathered around a sign for the metro.  
[H] There is a group of people near a subway sign.

[LABEL] **neutral** [PRED] **entailment** [COEFF] 10.3974  
[P] The young boy in the blue shirt is jumping into the water.  
[H] A boy is jumping into a lake.

## 1.59 Component 58

[LABEL] **neutral** [PRED] **neutral** [COEFF] 47.1747  
[P] A girl wearing a brown jacket and jeans is sitting on a rock wall at the edge of a hill, there are several small carts in the background.  
[H] The girls is waiting for her parents.

[LABEL] **neutral** [PRED] **neutral** [COEFF] 45.7891  
[P] A man sitting at a table wears a red sweater while two glasses of water rest on the table ; one glass is half empty.  
[H] A man is waiting for his wife to come back from the restroom

[LABEL] **neutral** [PRED] **neutral** [COEFF] 43.8753  
[P] Three dogs are in the snow in front of a fence.  
[H] The dogs are waiting for their owner to arrive.

[LABEL] **neutral** [PRED] **neutral** [COEFF] 41.0593  
[P] A man and a dog are sitting on the pavement are sitting by a wall.  
[H] The man and dog are waiting for a shop to open.

[LABEL] **neutral** [PRED] **neutral** [COEFF] 40.2795  
[P] A man wearing a brown leather coat is on the sidewalk, while leaning against a window seal.  
[H] The man is waiting for his wife to finish work.

[LABEL] **neutral** [PRED] **neutral** [COEFF] 38.9226  
[P] A man and some bicycles are in front of a large building.  
[H] The man is waiting for his date.

[LABEL] **neutral** [PRED] **neutral** [COEFF] 38.4397

[P] A man in a hooded jacket sits alone on a park bench.

[H] The man is waiting for his friend.

[LABEL] **neutral** [PRED] **neutral** [COEFF] 37.6784

[P] One girl is standing on the street, and the other is crouching looking at something on the ground.

[H] A girl is waiting for her friend to pick up her coin that she dropped.

[LABEL] **neutral** [PRED] **neutral** [COEFF] 36.7685

[P] An elderly man sitting in a park bench.

[H] The man is waiting for his lady.

[LABEL] **neutral** [PRED] **neutral** [COEFF] 36.3636

[P] A man stands in front of a building wearing a hat and suit.

[H] A man is waiting for his ride home from work.

[LABEL] **neutral** [PRED] **neutral** [COEFF] 34.4785

[P] A young asian girl and her doll on a shaded grassy lawn.

[H] A young girl is waiting for her parents to come outside.

[LABEL] **neutral** [PRED] **neutral** [COEFF] 33.3987

[P] A group of men standing by a road block.

[H] The men are waiting to get in the venue.

[LABEL] **neutral** [PRED] **neutral** [COEFF] 32.8675

[P] A man dressed in black is sitting on a ledge next to a building painted blue and white with words written on it.

[H] A man is waiting to meet his friend.

[LABEL] **neutral** [PRED] **neutral** [COEFF] 32.0545

[P] A woman in a bikini is standing on a sand court.

[H] A woman is waiting for her friend

[LABEL] **neutral** [PRED] **neutral** [COEFF] 31.9555

[P] A man leans against a table.

[H] A man is waiting for his ride

[LABEL] **neutral** [PRED] **neutral** [COEFF] 31.3634

[P] Several people are standing on a street corner.

[H] The people are waiting to cross the street

## 1.60 Component 59

[LABEL] **contradiction** [PRED] **contradiction** [COEFF] 18.7956

[P] A garbage man wearing a hat collects a garbage bin full of shoes.

[H] The garbage man is eating dinner.

[LABEL] contradiction [PRED] contradiction [COEFF] 18.6166

[P] Two men, each playing a guitar.

[H] Men are eating dinner.

[LABEL] contradiction [PRED] contradiction [COEFF] 17.9798

[P] A couple with sunglasses are laying on the beach.

[H] A couple are eating dinner at a restaurant.

[LABEL] contradiction [PRED] contradiction [COEFF] 17.5181

[P] A man and woman are at the ruins reading a guidebook.

[H] The man and woman are eating lunch.

[LABEL] contradiction [PRED] contradiction [COEFF] 16.6583

[P] A couple people at a museum looking in the gift shop, potentially going to buy something.

[H] A couple are eating lunch.

[LABEL] contradiction [PRED] contradiction [COEFF] 16.5646

[P] Two men in belt harnesses are working on a construction project, though only one wears his hard hat.

[H] Two men are eating lunch.

[LABEL] contradiction [PRED] contradiction [COEFF] 15.8985

[P] A man and woman holding hands in front of a lake.

[H] The couple is at home eating dinner.

[LABEL] contradiction [PRED] contradiction [COEFF] 15.4262

[P] A black mine rides a big tricycle with three large barrels strapped to the back.

[H] A black mime is eating dinner.

[LABEL] contradiction [PRED] contradiction [COEFF] 15.4114

[P] Several mischievous kids play with toy guns in a public area.

[H] Several children are sitting at a table eating lunch

[LABEL] contradiction [PRED] contradiction [COEFF] 15.0387

[P] A man and a woman are working on the wheel of a vehicle.

[H] A man and woman are eating lunch at a cafe

[LABEL] contradiction [PRED] contradiction [COEFF] 14.2801

[P] Two people are sitting on the ground and one is holding a red plastic cup.

[H] Two people are eating dinner.

[LABEL] contradiction [PRED] contradiction [COEFF] 13.7080

[P] A man in a green machine is cleaning a pump in front of the drake hotel.

[H] The man is eating fries at the beach

[LABEL] contradiction [PRED] contradiction [COEFF] 13.5831

[P] A smiling girl with a tattoo on her wrist is laying down in the beautiful, green grass.

[H] A girl is eating her lunch outside.

[LABEL] **contradiction** [PRED] **contradiction** [COEFF] 13.4555

[P] Superhero man leaping in a plaza

[H] A superhero is eating a sandwich for breakfast.

[LABEL] **contradiction** [PRED] **contradiction** [COEFF] 13.3146

[P] Three people playing musical instruments and singing on a stage.

[H] The three people are eating spaghetti.

[LABEL] **contradiction** [PRED] **contradiction** [COEFF] 13.0695

[P] Two people walking along a huge desert with a statue in the distance.

[H] Two people are eating a meal at a cafe.

## 1.61 Component 60

[LABEL] **entailment** [PRED] **entailment** [COEFF] 11.6014

[P] A man sits on a wooden bench in front of purple flowers while reading the paper.

[H] A man is reading by some flowers.

[LABEL] **entailment** [PRED] **entailment** [COEFF] 9.7720

[P] A woman with long blond - hair is sitting on a stool with a piano.

[H] A blonde woman sits by a piano

[LABEL] **entailment** [PRED] **entailment** [COEFF] 9.3738

[P] A woman in white holds some roses standing next to a young girl also in white.

[H] A woman is holding roses next to a girl in white

[LABEL] **neutral** [PRED] **entailment** [COEFF] 8.9569

[P] A young ( asian ) woman wearing sunglasses and a tan coat is smiling and hugging a wooden robot.

[H] A women is next to a robot.

[LABEL] **entailment** [PRED] **entailment** [COEFF] 8.2666

[P] A young girl is walking up to a bridge near dusk and is about to pass by a statue.

[H] Young girl is walking near the statue.

[LABEL] **entailment** [PRED] **entailment** [COEFF] 8.1907

[P] One person, smiling broadly, holds another person wearing a blue shirt ; both are soaking wet, and it is nighttime.

[H] One person smiles and holding another person who is also soaking wet.

[LABEL] **neutral** [PRED] **entailment** [COEFF] 8.0406

[P] A woman wearing a blue shirt and holding a baby looks down at a little girl wearing a lime green shirt and pink shoes.

[H] A woman is looking down at her child.

[LABEL] **entailment** [PRED] **entailment** [COEFF] 7.8692



[P] An orchestra is playing in a building in front of a large golden statue.

[H] There is a statue and an orchestra.

[LABEL] **entailment** [PRED] **entailment** [COEFF] 7.8331

[P] The woman in the purple shirt and gray pants is taking the black dog and a child with an orange shirt and a girl with a gray shirt out for a walk.

[H] A woman walks with a dog and two children.

[LABEL] **entailment** [PRED] **entailment** [COEFF] 7.6199

[P] A man with two fireworks in his hands while a woman in a red cap with an arrow through her head stands to his right.

[H] A woman dressed in red is standing next to a man who is holding something in his hands.

[LABEL] **entailment** [PRED] **entailment** [COEFF] 7.5661

[P] A blond woman sitting in a chair indoors smiles and looks at the child she is holding.

[H] A woman is holding a kid and is sitting in a chair.

[LABEL] **entailment** [PRED] **entailment** [COEFF] 7.5330

[P] A woman wearing gray, sitting on a picnic table by a baby stroller.

[H] A picnic table with a woman sitting at it and a baby stroller next to it.

[LABEL] **neutral** [PRED] **entailment** [COEFF] 7.3711

[P] A little girl, with blond - hair and a red shirt on, is playing in a big box.

[H] A girl with blond - hair in the box

[LABEL] **contradiction** [PRED] **entailment** [COEFF] 7.3547

[P] Woman wearing brown sandals and blue jeans, in a white shirt, holding a baby under a tall tree.

[H] A woman sits in a tree.

[LABEL] **entailment** [PRED] **entailment** [COEFF] 7.3450

[P] Two men, one younger guy with a yellow shirt that has luggage and the other and older guy, are sitting on a bench in front of a large building that has a billboard for glasses and sunglasses.

[H] Two men are sitting on a bench by a billboard for glasses.

[LABEL] **neutral** [PRED] **entailment** [COEFF] 7.1914

[P] A man in blue t - shirt and jeans, sitting with a baby in his lap.

[H] A man is sitting with a baby in his lap

## 1.62 Component 61

[LABEL] **contradiction** [PRED] **contradiction** [COEFF] 18.2248

[P] A young lady wearing yellow is feeding a small child at the table.

[H] The lady is old

[LABEL] **contradiction** [PRED] **contradiction** [COEFF] 16.4247

[P] A young swimmer sits in a bathing suit and waits for the next race.

[H] The old boy is waiting to swim.

[LABEL] contradiction [PRED] contradiction [COEFF] 15.7512  
[P] This is a young boy looking to be jumping on the trampoline in a very beautiful neighborhood.  
[H] There is an old boy jumping.

[LABEL] contradiction [PRED] contradiction [COEFF] 14.8932  
[P] Young man wearing hairnet on head and face  
[H] An old man wearing a hairnet.

[LABEL] contradiction [PRED] contradiction [COEFF] 13.1265  
[P] A group of five young people all dressed in black in a dimlight room  
[H] The group of people are old.

[LABEL] contradiction [PRED] contradiction [COEFF] 12.9659  
[P] A young man in sneakers and a red jacket is posing with one hand on the ground and the other raised in the air.  
[H] The man is old.

[LABEL] contradiction [PRED] contradiction [COEFF] 12.6332  
[P] Five young men playing rugby.  
[H] Old men are talking about rugby.

[LABEL] contradiction [PRED] contradiction [COEFF] 11.9158  
[P] A group of young adults are gathered around a lecture hall conversing and smiling.  
[H] A group of old people are talking and smiling.

[LABEL] contradiction [PRED] contradiction [COEFF] 10.4014  
[P] A young boy, playing basketball, is getting ready to take a shot.  
[H] An old man is running outside.

[LABEL] contradiction [PRED] contradiction [COEFF] 10.2682  
[P] Two young women sitting on a doorstep.  
[H] Two old women are sitting on the doorstep.

[LABEL] contradiction [PRED] contradiction [COEFF] 9.8631  
[P] A beautiful seascape invites these young men to jog and play.  
[H] The men are old

[LABEL] contradiction [PRED] contradiction [COEFF] 9.8464  
[P] Young men search through compact discs.  
[H] Old people look at records.

[LABEL] contradiction [PRED] contradiction [COEFF] 9.8085  
[P] A young child is jumping off a yellow stool inside a room in a house.  
[H] An old man sits on a bench with a fishing pole.

[LABEL] contradiction [PRED] contradiction [COEFF] 9.5157

[P] A young couple enjoys a snowball fight.

[H] The couple is very old

[LABEL] **contradiction** [PRED] **contradiction** [COEFF] 9.2839

[P] A baby wears a santa hat.

[H] An old man wears a santa hat.

[LABEL] **contradiction** [PRED] **contradiction** [COEFF] 9.2570

[P] A kid climbing the rock on an adventure.

[H] An old man sits on top of a large rock.

## 1.63 Component 62

[LABEL] **entailment** [PRED] **entailment** [COEFF] 28.5218

[P] A man reading on a street.

[H] A man is reading.

[LABEL] **entailment** [PRED] **entailment** [COEFF] 22.6585

[P] A dog drinking from a creek.

[H] A dog is drinking.

[LABEL] **entailment** [PRED] **entailment** [COEFF] 21.9315

[P] A woman cooking on the outdoor grill.

[H] A woman is cooking.

[LABEL] **entailment** [PRED] **entailment** [COEFF] 19.8182

[P] A man sitting in a large innertube drinking a beer.

[H] A man is drinking beer.

[LABEL] **entailment** [PRED] **entailment** [COEFF] 18.6384

[P] A woman with scarf on her head planting seeds.

[H] A woman is planting seeds.

[LABEL] **entailment** [PRED] **entailment** [COEFF] 18.3115

[P] A man processing vegetables in a messy area.

[H] A man is processing vegetables.

[LABEL] **entailment** [PRED] **entailment** [COEFF] 18.2464

[P] One guy flexing his muscles.

[H] The guy is flexing.

[LABEL] **entailment** [PRED] **entailment** [COEFF] 17.9249

[P] People eating at an outdoor event.

[H] People are eating.

[LABEL] **entailment** [PRED] **entailment** [COEFF] 17.6366

[P] People sitting outside a house enjoying wine.  
[H] People are drinking wine.

[LABEL] entailment [PRED] entailment [COEFF] 17.2512  
[P] People sitting and standing talking.  
[H] People are talking.

[LABEL] entailment [PRED] entailment [COEFF] 16.9487  
[P] A man eating something with a spoon.  
[H] A man is eating.

[LABEL] entailment [PRED] entailment [COEFF] 16.7288  
[P] Two men working on a brick wall.  
[H] Two men are working.

[LABEL] entailment [PRED] entailment [COEFF] 16.3809  
[P] A woman in a green jacket and glasses shopping.  
[H] A woman is shopping.

[LABEL] entailment [PRED] entailment [COEFF] 16.2281  
[P] Two children eating food.  
[H] Two kids are eating food

[LABEL] entailment [PRED] entailment [COEFF] 16.1247  
[P] A man in a blue shirt is stretching.  
[H] A man is stretching.

[LABEL] entailment [PRED] entailment [COEFF] 14.6891  
[P] Three people working on the ground work.  
[H] Three people are working.

## 1.64 Component 63

[LABEL] entailment [PRED] contradiction [COEFF] 45.4902  
[P] A boy playing with a shovel in the snow.  
[H] A boy is playing outside.

[LABEL] entailment [PRED] entailment [COEFF] 44.7721  
[P] Dogs playing in the snow  
[H] Dogs are outside

[LABEL] entailment [PRED] entailment [COEFF] 41.6267  
[P] Two girls with long hair jumping on a trampoline.  
[H] There are two females outside.

[LABEL] entailment [PRED] entailment [COEFF] 41.2856

[P] Young girl getting ready to rock climb.

[H] A girl is outside.

[LABEL] **entailment** [PRED] **contradiction** [COEFF] 40.7387

[P] A squirrel jumps in the snow.

[H] A squirrel is outside.

[LABEL] **entailment** [PRED] **entailment** [COEFF] 39.0108

[P] A boy with blue and yellow rain boots runs on dirt.

[H] A boy runs outside.

[LABEL] **entailment** [PRED] **entailment** [COEFF] 36.3434

[P] Two friends ride a bicycle.

[H] Two people outside.

[LABEL] **entailment** [PRED] **entailment** [COEFF] 36.2870

[P] Men in orange vests try to free a vehicle stuck beside a road.

[H] People are outside.

[LABEL] **entailment** [PRED] **entailment** [COEFF] 36.1304

[P] A man is wearing a short - sleeved shirt in the snow.

[H] A man is outside.

[LABEL] **neutral** [PRED] **entailment** [COEFF] 35.5350

[P] A girl is having a good time midair swinging on a swing.

[H] A girl is in a swing outside.

[LABEL] **entailment** [PRED] **entailment** [COEFF] 34.8310

[P] A man in a blue jacket sweeps the ground.

[H] There is a man outside.

[LABEL] **entailment** [PRED] **contradiction** [COEFF] 34.5490

[P] A white dog is walking through the leafy grass while a brown dog is about to bite it.

[H] Two dogs are outside.

[LABEL] **entailment** [PRED] **entailment** [COEFF] 33.8793

[P] A woman is running in the snow in a parka.

[H] A woman is running outside.

[LABEL] **entailment** [PRED] **entailment** [COEFF] 33.5694

[P] A woman in a blue ski coat pulls a tree through the snow on skies.

[H] A woman is outside.

[LABEL] **entailment** [PRED] **entailment** [COEFF] 33.1033

[P] A man surfing on a wave with a few people behind him swimming.

[H] Some people are outside.

[LABEL] **entailment** [PRED] **entailment** [COEFF] 32.7412  
[P] A man wearing a white hat is on a red atv driving on the dirt.  
[H] There is a man outside.

## 1.65 Component 64

[LABEL] **entailment** [PRED] **entailment** [COEFF] 13.8359  
[P] Performing some bike maintenance, the lady lubricates a frame before assembly is completed.  
[H] A woman works on fixing a bike

[LABEL] **neutral** [PRED] **entailment** [COEFF] 13.8141  
[P] Men throwing tomatoes from a large trash ben.  
[H] Some people are tossing food into a container.

[LABEL] **entailment** [PRED] **entailment** [COEFF] 13.5594  
[P] A child in a black shirt is being embraced by an older man in a white shirt, the man's face pressed against the child's cheek.  
[H] Two people are touching each other.

[LABEL] **entailment** [PRED] **entailment** [COEFF] 13.5436  
[P] A woman organizing lettuce in a market.  
[H] A woman arranges some produce

[LABEL] **entailment** [PRED] **entailment** [COEFF] 12.6455  
[P] A mime applying his makeup.  
[H] A professional is getting ready to perform.

[LABEL] **entailment** [PRED] **entailment** [COEFF] 12.5686  
[P] A group of girls are cheering.  
[H] More than one girl is acting encouragingly.

[LABEL] **entailment** [PRED] **entailment** [COEFF] 12.3046  
[P] A talent show person jumping and singing.  
[H] A talented person makes moves for the audience.

[LABEL] **entailment** [PRED] **entailment** [COEFF] 12.1260  
[P] A musical group performing before a large audience.  
[H] A group putting on a performance

[LABEL] **neutral** [PRED] **entailment** [COEFF] 11.8714  
[P] Two kids in a world of their own pretending to be pirates.  
[H] Some persons acting out a role.

[LABEL] **contradiction** [PRED] **entailment** [COEFF] 11.6686  
[P] Man in white karate uniform, flipping another person in a blue uniform with people looking on.  
[H] Some men are sparring.

[LABEL] **entailment** [PRED] **entailment** [COEFF] 11.2861  
[P] 2 boys in the foreground in a karate competition and coaches in background looking on with another coach sitting at table.  
[H] Two people watch a martial arts match.

[LABEL] **contradiction** [PRED] **entailment** [COEFF] 11.2717  
[P] The guy gets thrown out of the raft on the rapids.  
[H] The person fell of the raft.

[LABEL] **entailment** [PRED] **entailment** [COEFF] 10.7055  
[P] One male snowboarder on a snowy mountain doing a flip upside down.  
[H] A man is doing tricks on his snowboard.

[LABEL] **entailment** [PRED] **entailment** [COEFF] 10.6841  
[P] Two men are engaged in dialogue while sitting on a bench  
[H] Two men talk while sitting on the bench.

[LABEL] **entailment** [PRED] **entailment** [COEFF] 10.5731  
[P] Person dressed in dark clothing doing a flip into the snow along side the road.  
[H] A person playing out in the snow.

[LABEL] **entailment** [PRED] **entailment** [COEFF] 10.5573  
[P] A young boy going through a vegetable bin.  
[H] A child is interacting with a container for edible plants.

## 1.66 Component 65

[LABEL] **entailment** [PRED] **entailment** [COEFF] 9.7238  
[P] Several people walking along a curved walkway inside of a building with various advertisements.  
[H] People are walking along a curved walkway

[LABEL] **entailment** [PRED] **entailment** [COEFF] 9.4479  
[P] Two children eating food.  
[H] Two kids are eating food

[LABEL] **entailment** [PRED] **entailment** [COEFF] 9.3137  
[P] Young women in colorful costumes raise their hands in happiness.  
[H] Women are in colorful costumes.

[LABEL] **entailment** [PRED] **entailment** [COEFF] 9.2284  
[P] Four people playing instruments on a public place.  
[H] People are playing instruments on a public place.

[LABEL] **entailment** [PRED] **entailment** [COEFF] 8.7299  
[P] People walking in front of heavily painted wall.  
[H] People are walking

[LABEL] entailment      [PRED] entailment      [COEFF] 8.5040  
 [P] Three girls dancing.  
 [H] Girls are dancing.

[LABEL] entailment      [PRED] entailment      [COEFF] 8.4500  
 [P] Lots of people sitting on grass at a park.  
 [H] People are sitting on grass.

[LABEL] entailment      [PRED] entailment      [COEFF] 8.3887  
 [P] People waiting for a train on the underground platform of an urban metro system.  
 [H] People waiting for a train

[LABEL] entailment      [PRED] entailment      [COEFF] 8.3158  
 [P] Young girls running in a race.  
 [H] Girls are running in a race.

[LABEL] entailment      [PRED] entailment      [COEFF] 8.2796  
 [P] Big multicolored balloons.  
 [H] The balloons are multicolored.

[LABEL] entailment      [PRED] entailment      [COEFF] 8.1714  
 [P] Very colorful women at a party.  
 [H] Woman are at a party.

[LABEL] entailment      [PRED] entailment      [COEFF] 8.0921  
 [P] Performers on stage using a sheet as a prop  
 [H] There are performers on a stage.

[LABEL] entailment      [PRED] entailment      [COEFF] 8.0209  
 [P] Two monks walking together.  
 [H] Two monks are walking together

[LABEL] entailment      [PRED] entailment      [COEFF] 7.9678  
 [P] A lovely lady playing music.  
 [H] A lady is playing music.

[LABEL] entailment      [PRED] entailment      [COEFF] 7.7915  
 [P] Two people jogging on a path.  
 [H] Two people are jogging

[LABEL] entailment      [PRED] entailment      [COEFF] 7.6874  
 [P] Young woman using chopsticks to eat asian noodles.  
 [H] Young woman are using chopsticks



## 1.67 Component 66

[LABEL] **neutral** [PRED] **neutral** [COEFF] 23.6136

[P] Three women one of which is holding a paper cup posing in front of a christmas tree.

[H] Three women one of which is holding a paper cup posing in front of a christmas tree making funny faces.

[LABEL] **neutral** [PRED] **neutral** [COEFF] 21.8192

[P] A woman at the beach is sitting under an umbrella.

[H] A woman sits under an umbrella at the beach, watching her children play in the surf.

[LABEL] **neutral** [PRED] **neutral** [COEFF] 19.8192

[P] A man playing what looks like a guitar with a bow like a violin.

[H] A man playing what looks like a guitar with a bow like a violin is putting on a performance for the crowd

[LABEL] **neutral** [PRED] **neutral** [COEFF] 18.9350

[P] A group of asian band members playing a song.

[H] A group of band members playing a song and dancing

[LABEL] **neutral** [PRED] **neutral** [COEFF] 18.9286

[P] Two girls showing something to each other.

[H] Two girls are showing each other their new toys.

[LABEL] **neutral** [PRED] **neutral** [COEFF] 18.6414

[P] The little boy runs into the ocean.

[H] The little boy runs into the ocean to play with water

[LABEL] **neutral** [PRED] **neutral** [COEFF] 18.5978

[P] Two women jog down the street.

[H] Two women chat with each other as they jog down the street.

[LABEL] **neutral** [PRED] **neutral** [COEFF] 17.4094

[P] A blond boy wipes his nose on his light blue shirt.

[H] A blond boy is wiping his nose on his shirt and his mom is yelling.

[LABEL] **neutral** [PRED] **neutral** [COEFF] 16.8101

[P] Dark - haired woman with yellow sweater in jean walks down the street.

[H] Dark - haired woman with yellow sweater in jean walks down the street with a dog on a leash.

[LABEL] **neutral** [PRED] **neutral** [COEFF] 16.4946

[P] Two children take a picture of something in the distance.

[H] Two asian children take a picture of something in the distance.

[LABEL] **neutral** [PRED] **neutral** [COEFF] 15.7515

[P] A referee offers his hand to a fallen soccer player.

[H] A referee offers his hand to a fallen soccer player, who is bleeding a bit from his forehead.

[LABEL] entailment [PRED] neutral [COEFF] 15.5250  
[P] A woman wearing glasses holds a small animal in her hands.  
[H] A woman wearing glasses holds a small animal in her hands and is petting it

[LABEL] neutral [PRED] neutral [COEFF] 15.2068  
[P] A band on stage and a large audience.  
[H] A band on stage and a large audience are surprised by the loud clap of thunder.

[LABEL] neutral [PRED] neutral [COEFF] 15.1448  
[P] Two people swimming on a floating while a black dog follows.  
[H] Two people swimming on a floating while a black dog follows hoping to get to play with them.

[LABEL] neutral [PRED] neutral [COEFF] 14.1475  
[P] Two young girls in a street.  
[H] The girls are dancing in the street.

[LABEL] neutral [PRED] neutral [COEFF] 13.7673  
[P] A man is laying on a deck.  
[H] A man is laying on a deck in a bathing suit.

## 1.68 Component 67

[LABEL] entailment [PRED] entailment [COEFF] 6.1983  
[P] A man is leaping from the ground while another man is looking at him.  
[H] A man is jumping while another man watches.

[LABEL] entailment [PRED] entailment [COEFF] 6.0917  
[P] Two men in cadet caps seem to be awaiting the beginning of ceremonies at a service veterans event in a park.  
[H] Two men wearing cadet caps are waiting for the beginning of the ceremony for service veterans at a park outside.

[LABEL] entailment [PRED] entailment [COEFF] 5.7823  
[P] Two dogs run on a path near a stone bench.  
[H] Two dogs are running on a path next to a stone bench

[LABEL] entailment [PRED] entailment [COEFF] 5.5915  
[P] A man with short hair outs his arm around a woman with long brown hair.  
[H] A man with short hair embraces a woman with long brown hair

[LABEL] entailment [PRED] entailment [COEFF] 5.5210  
[P] A white - haired man and a dark headed woman are standing in the forest while talking.  
[H] Two people are talking in among the trees.

[LABEL] entailment [PRED] entailment [COEFF] 5.2705  
[P] A man in shorts, on a bicycle, rides along side a wave - crashing waterfront while his leashed dog is to his right hand side.

[H] A man on a bike rides beside the water with a dog.

[LABEL] **entailment** [PRED] **entailment** [COEFF] 5.2161

[P] Baseball player melky cabrera wearing number 53 jersey standing behind home plate looks on as his team rounds home behind the catcher.

[H] Melky cabrera watches his team round home.

[LABEL] **entailment** [PRED] **entailment** [COEFF] 5.1869

[P] A curly - haired little girl is on the shore of a beach look down at the water.

[H] A girl with curly hair is watching the water at the beach.

[LABEL] **entailment** [PRED] **entailment** [COEFF] 5.1696

[P] Two black and white dogs walking on dirt, one of which has a ball in its mouth.

[H] Two black and white dogs are walking with one having a ball in its mouth.

[LABEL] **entailment** [PRED] **entailment** [COEFF] 5.1394

[P] Large group of people, most setting down on a walkway with two boys standing up holding plates.

[H] Two boys stand outdoor holding plates.

[LABEL] **entailment** [PRED] **entailment** [COEFF] 5.1371

[P] A woman in a colorful sari walks with a small boy who is carrying an umbrella through a busy city in the pouring rain.

[H] A woman is outside with a small boy, walking in the rain covered by an umbrella

[LABEL] **entailment** [PRED] **entailment** [COEFF] 4.8822

[P] A bearded man in a white t - shirt is riding a motorcycle.

[H] The motorcycle is being driven by a bearded man with a white t - shirt.

[LABEL] **entailment** [PRED] **entailment** [COEFF] 4.8322

[P] A lady running a relay race is running barefoot through some water.

[H] The barefoot lady runs through some water during the relay race.

[LABEL] **neutral** [PRED] **entailment** [COEFF] 4.7208

[P] Two people are dressed in animal costumes and are walking down a street.

[H] Two people in animal costumes are walking past other people.

[LABEL] **entailment** [PRED] **entailment** [COEFF] 4.6736

[P] Two vendors with red and white umbrellas are outside in the middle of a lot of people.

[H] A lot of people surround two vendors with red and white umbrellas.

[LABEL] **entailment** [PRED] **entailment** [COEFF] 4.6474

[P] A little boy with very curly hair is sitting in a blue chair with a toy in his hands.

[H] A curly - haired boy is holding a toy.

## 1.69 Component 68

[LABEL] **neutral** [PRED] **neutral** [COEFF] 46.6471

[P] Multiple people working on a wooden structure.  
[H] There are people working on something for an event

[LABEL] **neutral** [PRED] **neutral** [COEFF] 41.9631  
[P] Small black and brown dog playing with a red ball in the grass.  
[H] A dog retrieves a red ball for its owner.

[LABEL] **neutral** [PRED] **neutral** [COEFF] 38.9716  
[P] A white dog running on the beach.  
[H] A dog is running away from its owner.

[LABEL] **neutral** [PRED] **neutral** [COEFF] 38.3757  
[P] A woman with a yellow shirt stretching on a bridge.  
[H] A woman stretches before her exercise.

[LABEL] **entailment** [PRED] **neutral** [COEFF] 36.0318  
[P] Children of opposing teams playing a game of soccer  
[H] Children are playing a soccer match on a soccer field.

[LABEL] **neutral** [PRED] **neutral** [COEFF] 35.3653  
[P] Woman in long skirt walking across street.  
[H] Prostitute walks across a street to a potential customer.

[LABEL] **neutral** [PRED] **neutral** [COEFF] 33.3700  
[P] A woman in shorts and a blue sleeveless shirt leans over a golf club.  
[H] A woman leans over her golf club while she contemplates a putt.

[LABEL] **entailment** [PRED] **neutral** [COEFF] 32.9652  
[P] Trampolines are a fun way to exercise.  
[H] A group of people on a trampoline.

[LABEL] **neutral** [PRED] **neutral** [COEFF] 30.3679  
[P] A woman wearing many beaded necklaces looks at a child with just one.  
[H] There is a women with a child outdoors

[LABEL] **contradiction** [PRED] **neutral** [COEFF] 30.1523  
[P] A man pushing a cart with an umbrella attached.  
[H] There is a man watching someone push a cart

[LABEL] **neutral** [PRED] **neutral** [COEFF] 29.1528  
[P] A girl is biking over the street.  
[H] A girls is learning to ride without training wheels.

[LABEL] **neutral** [PRED] **neutral** [COEFF] 29.0810  
[P] A musician sings a song and plays the guitar.  
[H] A person is performing music in front of a crowd.

[LABEL] **neutral** [PRED] **neutral** [COEFF] 28.3505

[P] A baseball team is playing a game during the night.

[H] Some people are playing a game while on vacation.

[LABEL] **entailment** [PRED] **neutral** [COEFF] 28.3437

[P] Four young girls reading a book in the back of a car with boxes of produce.

[H] Four girls are reading a book together.

[LABEL] **neutral** [PRED] **neutral** [COEFF] 28.2129

[P] A girl dressed in a red top, a red cap, and light colored shorts, sits on a rock outside.

[H] A girl is waiting for someone outside.

[LABEL] **neutral** [PRED] **neutral** [COEFF] 28.1887

[P] Man carrying duffel bag uses pay phone next to homeless man sleeping.

[H] A man has a duffel bag with important items inside.

## 1.70 Component 69

[LABEL] **entailment** [PRED] **entailment** [COEFF] 19.7991

[P] Two men wearing reflective vests walking on the side of the road.

[H] A pair of men are walking together.

[LABEL] **entailment** [PRED] **entailment** [COEFF] 19.4600

[P] A group of people are gathered around pews.

[H] The people are gathered together.

[LABEL] **entailment** [PRED] **entailment** [COEFF] 18.3707

[P] A group of asian people in costume are marching in a parade and playing instruments.

[H] People are marching together.

[LABEL] **entailment** [PRED] **entailment** [COEFF] 17.8753

[P] A group of young children, boys and girls, are playing a game of soccer.

[H] Young children play soccer together.

[LABEL] **entailment** [PRED] **entailment** [COEFF] 16.5329

[P] Two little boys, one with blue pants and shirt, and the other with blue shirt and gray pants, are playing with thomas the train toys on a hardwood floor.

[H] The little boys are playing together.

[LABEL] **entailment** [PRED] **neutral** [COEFF] 15.9449

[P] Three people sing into a microphone.

[H] The people are singing together.

[LABEL] **entailment** [PRED] **entailment** [COEFF] 15.8914

[P] Men are playing basketball in front of a large crowd.

[H] People play a sport together.

[LABEL] entailment [PRED] entailment [COEFF] 14.6344

[P] A crowd is gathered for some event while a woman in a flowered blouse talks with a man in a brown t - shirt.

[H] A group of people gathers together

[LABEL] entailment [PRED] entailment [COEFF] 14.5260

[P] Two very young boys and an adult are playing with big preschool legos and a red dish - shaped play cushion that's filled with balls on a white carpet in front of a gray couch.

[H] Boys and an adult are playing together.

[LABEL] entailment [PRED] entailment [COEFF] 14.5227

[P] Tree in the foreground, two men playing golf in the background.

[H] Two men play golf together.

[LABEL] entailment [PRED] entailment [COEFF] 14.2705

[P] People in a bounce house shaped like a castle with several people sitting and watching.

[H] Many humans are gathered together.

[LABEL] entailment [PRED] entailment [COEFF] 14.2087

[P] A man and girl sit on a bench while eating ice cream cones.

[H] The couple sit together.

[LABEL] entailment [PRED] entailment [COEFF] 13.9498

[P] A dozen workers wearing uniforms sanitation hats are working on an assembly line in a factory.

[H] A group of people are working together in a factory

[LABEL] entailment [PRED] entailment [COEFF] 13.7525

[P] Two women in green and yellow costumes with white sleeves put up their hands and smile while walking along a brown stage with leaves in the background.

[H] Two women walk together in costumes

[LABEL] neutral [PRED] entailment [COEFF] 13.6223

[P] A black dog and a brown and white dog are playing with a stick in the water.

[H] The dogs are playing together.

[LABEL] entailment [PRED] entailment [COEFF] 13.2822

[P] Three dogs standing in snow next to a blue fence.

[H] A group of animals is standing together.

## 1.71 Component 70

[LABEL] entailment [PRED] entailment [COEFF] 13.7818

[P] A mother is trying to get her children to smile for a picture.

[H] A mother is taking a picture.

[LABEL] entailment [PRED] entailment [COEFF] 12.4693

[P] A child is looking onto a tray of food, kept on the table, by standing on his chair.

[H] A child looks at food

[LABEL] **entailment** [PRED] **entailment** [COEFF] 11.9570

[P] Band students performing at an outdoor concert, with tents and audience in the background.

[H] The band performs.

[LABEL] **contradiction** [PRED] **entailment** [COEFF] 11.7349

[P] A small dog and a large dog carrying a stick in its mouth run outside.

[H] People are carrying sticks.

[LABEL] **entailment** [PRED] **entailment** [COEFF] 11.5380

[P] A girl is doing a trick on a balance beam.

[H] A girl is doing tricks

[LABEL] **entailment** [PRED] **entailment** [COEFF] 11.4707

[P] People are looking at children's toys in a store.

[H] The people look at toys.

[LABEL] **entailment** [PRED] **entailment** [COEFF] 11.1066

[P] A woman teaching a young boy how to use a pottery wheel in an art class.

[H] The art class teaches pottery.

[LABEL] **entailment** [PRED] **entailment** [COEFF] 10.9988

[P] At a baseball game, one girl slides through dirt into a base while the other raises her arms.

[H] The girl is at a baseball game.

[LABEL] **neutral** [PRED] **entailment** [COEFF] 10.9911

[P] An indian man is writing on something in a crowd of women and children.

[H] An indian man is in a crowd of people.

[LABEL] **entailment** [PRED] **entailment** [COEFF] 10.8354

[P] Two women working on a yarn machine.

[H] Two women working.

[LABEL] **neutral** [PRED] **entailment** [COEFF] 10.7171

[P] A chinese woman has blue rain boots on and a poncho.

[H] A woman in the rain.

[LABEL] **entailment** [PRED] **entailment** [COEFF] 10.7160

[P] Two dogs playing with a stick in the water.

[H] Dogs in the water.

[LABEL] **entailment** [PRED] **entailment** [COEFF] 10.5187

[P] Man playing for a baseball team with a blue protective hat and baseball uniform, playing for south carolina, is swinging the bat and missing the ball.

[H] A person playing baseball.

[LABEL] entailment [PRED] entailment [COEFF] 10.5076

[P] Two ladies are cooking talking and two gentlemen are talking in the opposite site of the kitchen.

[H] People in the house are chatting with each other.

[LABEL] entailment [PRED] entailment [COEFF] 10.1721

[P] Two children are playing on a swing made out of a tire.

[H] Children playing on a tire swing.

[LABEL] entailment [PRED] entailment [COEFF] 10.1161

[P] Two men are working by a big truck.

[H] The two men are working.

## 1.72 Component 71

[LABEL] entailment [PRED] entailment [COEFF] 30.7868

[P] A woman with dark hair in bending, open mouthed, towards the back of a dark headed toddler's head.

[H] A woman has dark hair

[LABEL] entailment [PRED] entailment [COEFF] 29.1391

[P] A woman with long blond - hair is standing over her bicycle while other bicycles are around her.

[H] The woman has long hair.

[LABEL] entailment [PRED] entailment [COEFF] 26.6184

[P] A man with gray hair and a plaid shirt is smoking a cigarette.

[H] A man has gray hair.

[LABEL] entailment [PRED] entailment [COEFF] 24.7383

[P] A dark - haired girl holding a racket in one hand and showing the peace sign with the other hand.

[H] The girl has dark hair.

[LABEL] neutral [PRED] entailment [COEFF] 24.7082

[P] A man with long hair getting stopped by security guards.

[H] The man has long hair.

[LABEL] entailment [PRED] entailment [COEFF] 23.8141

[P] A woman with black hair with purple streaks in it takes a bite while her companion in a red shirt looks on.

[H] The woman has black hair.

[LABEL] entailment [PRED] entailment [COEFF] 23.5917

[P] A woman wearing black with black hair is standing in front of a wall with writing in multiple languages.

[H] A woman has black hair.

[LABEL] entailment [PRED] entailment [COEFF] 21.9179

[P] A beautiful red - haired woman is posing for the camera.

[H] The woman has red hair.



[LABEL] entailment [PRED] entailment [COEFF] 20.9199  
[P] A woman with long brown hair is holding a wide awake baby.  
[H] The woman has long haird

[LABEL] entailment [PRED] entailment [COEFF] 18.8138  
[P] A man with a beard scoops rice into bowls.  
[H] The man has a beard

[LABEL] entailment [PRED] entailment [COEFF] 18.4685  
[P] A child with blue eyes sitting amid flowers.  
[H] The child has blue eyes.

[LABEL] entailment [PRED] entailment [COEFF] 16.4576  
[P] A dark - skinned man handing someone his phone.  
[H] The man has dark skin.

[LABEL] entailment [PRED] entailment [COEFF] 16.3973  
[P] A man with black hair and a black mustache sitting down and putting his hand above some burning embers while holding a metal bowl.  
[H] A man has a black mustache.

[LABEL] entailment [PRED] entailment [COEFF] 15.6440  
[P] A red - haired woman sits on a subway.  
[H] The woman has red hair.

[LABEL] entailment [PRED] entailment [COEFF] 14.3963  
[P] A small child with a ponytail dressed in jean shorts and a pink and brown shirt climbs on a pole near wooden playground equipment.  
[H] A kid has a ponytail

[LABEL] entailment [PRED] entailment [COEFF] 13.9676  
[P] He is walking with a brown coat.  
[H] He has a brown coat.

### 1.73 Component 72

[LABEL] entailment [PRED] entailment [COEFF] 9.2014  
[P] A man demonstrates his product.  
[H] A man is showing a product.

[LABEL] entailment [PRED] entailment [COEFF] 8.9597  
[P] People walking in a marathon.  
[H] People walking in a marathon.

[LABEL] entailment [PRED] entailment [COEFF] 8.9566  
[P] Members of a brass band look at their sheet music.

[H] A brass band looks at their sheet music.

[LABEL] entailment [PRED] entailment [COEFF] 8.6688  
[P] Group of kids riding scooters.  
[H] Group of kids riding scooters.

[LABEL] entailment [PRED] entailment [COEFF] 7.9288  
[P] A group of people sitting at a sporting event.  
[H] A group of people sit at a sporting event.

[LABEL] entailment [PRED] entailment [COEFF] 7.4811  
[P] A vendor sells plants at an outdoor market.  
[H] A vendor sells plants at an outdoor market

[LABEL] entailment [PRED] entailment [COEFF] 7.4228  
[P] A hiker with a backpack wades in a river.  
[H] A hiker wades in a river.

[LABEL] entailment [PRED] entailment [COEFF] 7.3475  
[P] A marching band plays in a park.  
[H] A marching band in a park.

[LABEL] entailment [PRED] entailment [COEFF] 7.1661  
[P] Children are learning to care for newborn infants along side their parents.  
[H] Children are learning to care for newborn infants.

[LABEL] entailment [PRED] entailment [COEFF] 6.8938  
[P] A group of children are playing tug - of - war.  
[H] A group of kids are playing tug - of - war.

[LABEL] entailment [PRED] entailment [COEFF] 6.8433  
[P] A woman plays the violin.  
[H] A women plays a violin.

[LABEL] entailment [PRED] entailment [COEFF] 6.8205  
[P] A baseball pitcher on the mound throwing a baseball.  
[H] A baseball pitcher is on the mound.

[LABEL] entailment [PRED] entailment [COEFF] 6.7362  
[P] A darkly clad musician gives a focused look as he views his instrument.  
[H] A musician looks at his instrument.

[LABEL] entailment [PRED] entailment [COEFF] 6.6849  
[P] A surfer is riding a wave.  
[H] A person is surfing.

[LABEL] entailment [PRED] entailment [COEFF] 6.6132

[P] A child is riding a skateboard and crying while a man holds his arm.  
[H] A child is riding a skateboard.

[LABEL] entailment [PRED] entailment [COEFF] 6.5967  
[P] Two people in a slingshot ride.  
[H] Two people in a slingshot ride.

## 1.74 Component 73

[LABEL] contradiction [PRED] contradiction [COEFF] 12.2644  
[P] The man with the black tee and blue jeans is trying to make a repair on his blue minivan.  
[H] The guy wears a yellow striped jumpsuit with suspenders.

[LABEL] contradiction [PRED] contradiction [COEFF] 10.9957  
[P] A young girl is wearing a purple shirt and pink headband.  
[H] She wore all black.

[LABEL] contradiction [PRED] contradiction [COEFF] 10.8960  
[P] Man in black shirt wringing his mop as he cleans an amusement park ride.  
[H] A man is eating a steak.

[LABEL] contradiction [PRED] contradiction [COEFF] 9.8232  
[P] A man chiseling wood, holding a pencil behind his right ear.  
[H] A man is creating a statue of marble.

[LABEL] contradiction [PRED] contradiction [COEFF] 9.8078  
[P] A man wearing sunglasses and a blue jacket with a patch of the korean flag on the left side of the jacket is sitting in a car, asleep.  
[H] A man is driving a tank.

[LABEL] contradiction [PRED] contradiction [COEFF] 9.4082  
[P] Bearded man playing a game with toy soldiers, tanks and a dice with a soldier and a bomb painted on it.  
[H] The man is playing battleship with his pet turtle.

[LABEL] contradiction [PRED] contradiction [COEFF] 9.2978  
[P] Our little model is wearing the colors for spring white and pink.  
[H] A model is dressed entirely in black.

[LABEL] contradiction [PRED] contradiction [COEFF] 8.7913  
[P] A woman and her child are resting outside of a mcdonald's restaurant while eating meanwhile a man in white is sitting inside the restaurant next to a large window.  
[H] The woman is inside a walmart

[LABEL] contradiction [PRED] contradiction [COEFF] 8.6049  
[P] A young girl in a pink tank top licks her lips from eating an ice cream cone.  
[H] The young girl is drinking a bloody mary at home.

[LABEL] **contradiction** [PRED] **contradiction** [COEFF] 8.4605

[P] A boy taking aim at a target on a bale of hay with his bow and arrow.

[H] Boy aiming at soda can with air rifle.

[LABEL] **contradiction** [PRED] **contradiction** [COEFF] 8.3884

[P] A man with white hair and glasses is using a chisel and hammer to carve pieces of wood.

[H] A young man paints with oil on canvas.

[LABEL] **contradiction** [PRED] **contradiction** [COEFF] 8.1509

[P] Two males, one white and one black, singing and playing the guitar.

[H] Two white guys are playing chess

[LABEL] **contradiction** [PRED] **contradiction** [COEFF] 8.0398

[P] Young woman in a white shirt is talking to a person in a black hat, while a football game is shown on a flat screen tv in the background.

[H] A young woman practices playing cello in her room alone.

[LABEL] **neutral** [PRED] **contradiction** [COEFF] 7.9402

[P] A man in green with a beard and white hat is walking next to a large orange wall.

[H] The man is wearing black shoes.

[LABEL] **contradiction** [PRED] **contradiction** [COEFF] 7.8939

[P] There is a man wearing construction gear, standing next to a bulldozer that is picking up rubble and debris.

[H] A man is driving a sports car.

[LABEL] **contradiction** [PRED] **contradiction** [COEFF] 7.7285

[P] A folk dancer is twirling her coral colored skirt.

[H] The tap dancer wore long black pants while she performed

## 1.75 Component 74

[LABEL] **neutral** [PRED] **neutral** [COEFF] 32.0421

[P] A raft is being paddled through a white water river.

[H] The raft is large.

[LABEL] **entailment** [PRED] **neutral** [COEFF] 31.5096

[P] A curly - haired girl is dragging a gray inflatable raft with a red paddle into the water.

[H] The water is not too hot to go in.

[LABEL] **neutral** [PRED] **neutral** [COEFF] 29.4334

[P] A man in a yellow outfit riding a yellow motorcycle.

[H] The man is an experienced rider.

[LABEL] **neutral** [PRED] **neutral** [COEFF] 28.6847

[P] A guy in a green and pink shirt stands near a grill by a boat.

[H] The grill is hot

[LABEL] **neutral** [PRED] **neutral** [COEFF] 28.2320

[P] A couple on a beach, the woman is touching the man's face.

[H] The beach is crowded with people.

[LABEL] **neutral** [PRED] **neutral** [COEFF] 27.1983

[P] A man is carrying a white bag and walking down a tree lined street.

[H] The street is filled with people

[LABEL] **neutral** [PRED] **neutral** [COEFF] 26.9787

[P] A group of six children are about to play ping - pong.

[H] Some of the kids are more skilled at ping - pong than others.

[LABEL] **neutral** [PRED] **neutral** [COEFF] 25.4080

[P] Two men who are wearing black shirts and pants are holding wooden sticks.

[H] The sticks are large.

[LABEL] **neutral** [PRED] **neutral** [COEFF] 24.8964

[P] Several soccer players stand by in a brown, grassy, rural field with a building in the background.

[H] The soccer players know each other.

[LABEL] **neutral** [PRED] **neutral** [COEFF] 24.6507

[P] Several people are walking through a lush garden.

[H] The people are looking for something

[LABEL] **neutral** [PRED] **neutral** [COEFF] 24.0854

[P] A young girl in shorts is swinging on a vine.

[H] Girl swings very high

[LABEL] **neutral** [PRED] **neutral** [COEFF] 23.1448

[P] A man in a room with three other people holding a large camera.

[H] The man knows the three other people.

[LABEL] **neutral** [PRED] **neutral** [COEFF] 23.0498

[P] A german sheperd and a small white dog are playing

[H] The small dog is fast

[LABEL] **neutral** [PRED] **neutral** [COEFF] 22.7917

[P] The woman is holding a violin.

[H] She is an expert violinist.

[LABEL] **neutral** [PRED] **neutral** [COEFF] 21.4939

[P] A man riding a vehicle pulled by a donkey in the run down area of town.

[H] The donkey is on a rampage

[LABEL] **neutral** [PRED] **neutral** [COEFF] 21.4486

[P] A child rolls a ball at a bowling pin while a woman helps another child arrange some sort of symbols on the concrete ground next to the first child.

[H] The child is very good at bowling.

## 1.76 Component 75

[LABEL] **entailment** [PRED] **entailment** [COEFF] 17.0225

[P] A couple is walking on the beach.

[H] A couple is walking.

[LABEL] **entailment** [PRED] **entailment** [COEFF] 16.9940

[P] A black dog is walking through a stream

[H] A black dog is walking.

[LABEL] **entailment** [PRED] **entailment** [COEFF] 16.7737

[P] An older couple is walking down the street.

[H] A couple is walking.

[LABEL] **entailment** [PRED] **entailment** [COEFF] 14.7708

[P] A large crowd of people are walking down the street.

[H] A group of people are walking.

[LABEL] **entailment** [PRED] **entailment** [COEFF] 13.6248

[P] A woman in a red coat is walking with a shopping bag and a large black umbrella.

[H] A woman in a red coat is walking.

[LABEL] **entailment** [PRED] **entailment** [COEFF] 11.1667

[P] A man in a gray robe is walking in the shade.

[H] A man in a robe is walking.

[LABEL] **entailment** [PRED] **entailment** [COEFF] 10.8749

[P] A man is walking with a cane.

[H] The man is walking.

[LABEL] **entailment** [PRED] **entailment** [COEFF] 10.4012

[P] Two black women are walking under a covered structure.

[H] Two women are walking.

[LABEL] **neutral** [PRED] **entailment** [COEFF] 10.0390

[P] A young girl is walking through a grassy pasture.

[H] A young girl walks around.

[LABEL] **entailment** [PRED] **entailment** [COEFF] 10.0064

[P] A construction worker walks down the street.

[H] A construction worker walking.

[LABEL] entailment [PRED] entailment [COEFF] 9.7726

[P] A man walks on the sidewalk.

[H] A man walks.

[LABEL] neutral [PRED] entailment [COEFF] 9.7394

[P] A man in suit is walking down a crowded street.

[H] A man is walking

[LABEL] entailment [PRED] entailment [COEFF] 9.3147

[P] Several men walking in the rain under an umbrella.

[H] Several men are walking.

[LABEL] entailment [PRED] entailment [COEFF] 9.1176

[P] A man wearing sunglasses, headphones and a dark coat is walking down the street.

[H] A man is walking.

[LABEL] entailment [PRED] entailment [COEFF] 8.6520

[P] A group of people are walking and standing in front of a mural with a woman on a ladder on it.

[H] People are walking.

[LABEL] entailment [PRED] entailment [COEFF] 8.3572

[P] An individual is walking out of an place.

[H] An individual is walking.

## 1.77 Component 76

[LABEL] contradiction [PRED] contradiction [COEFF] 10.9480

[P] A woman is scooping ice cream at a table with candy and toppings on it in clear bowls.

[H] A man is scooping ice cream at a table with candy and toppings on it in clear bowls.

[LABEL] contradiction [PRED] contradiction [COEFF] 10.8590

[P] A woman is shopping for fresh food at an outdoor market.

[H] A man is shopping for fresh food.

[LABEL] contradiction [PRED] contradiction [COEFF] 10.6318

[P] A woman tweaking something on a bike hanging from a fence.

[H] A man tweaking something on a bike hanging from a fence.

[LABEL] contradiction [PRED] contradiction [COEFF] 10.6138

[P] A woman walking along a boardwalk.

[H] A man walking along a boardwalk.

[LABEL] contradiction [PRED] contradiction [COEFF] 10.5461

[P] A woman is excersizing outside.

[H] A man is excersizing outside.

[LABEL] contradiction [PRED] contradiction [COEFF] 9.7716

[P] A woman walking past a sign.

[H] A man walking past a sign.

[LABEL] contradiction [PRED] contradiction [COEFF] 9.6497

[P] A woman wearing a straw hat and floral skirt is sitting on cement stairs with her head in her hands.

[H] A man wearing a straw hat.

[LABEL] contradiction [PRED] contradiction [COEFF] 9.5685

[P] A woman is hiking in a snowy forest.

[H] A man is in a forest.

[LABEL] contradiction [PRED] contradiction [COEFF] 9.4636

[P] A woman holding a boombox.

[H] A man holding a boombox.

[LABEL] contradiction [PRED] contradiction [COEFF] 9.4516

[P] Woman looking through a microscope in a lab.

[H] A man is looking through a telescope in the lab

[LABEL] contradiction [PRED] contradiction [COEFF] 9.3297

[P] A woman is kneeling on the ground taking a photograph.

[H] A man is taking pictures.

[LABEL] contradiction [PRED] contradiction [COEFF] 9.1384

[P] A woman sits on a bench in an art museum or church under a large religious painting.

[H] A man sits on a bench

[LABEL] contradiction [PRED] contradiction [COEFF] 8.9828

[P] A woman wiping the brow of another woman, sitting down amongst a crowd of woman, drinking from a bottle.

[H] A man is wiping a brow.

[LABEL] contradiction [PRED] contradiction [COEFF] 8.8457

[P] A woman with a hat operates a machine on the wood railing.

[H] A man is wearing a hat and operating a machine.

[LABEL] contradiction [PRED] contradiction [COEFF] 8.6829

[P] A woman wearing glasses holds a mirror with one hand while drawing a picture with the other.

[H] A man is wearing glasses.

[LABEL] contradiction [PRED] contradiction [COEFF] 8.5815

[P] A woman catches a young boy jumping into the pool.

[H] A man catches a young boy jumping into the pool.



## 1.78 Component 77

[LABEL] contradiction [PRED] contradiction [COEFF] 9.4872

[P] A guy looking at posters displayed outside of a building.

[H] A woman looking at posters.

[LABEL] contradiction [PRED] contradiction [COEFF] 9.3701

[P] Man in a canoe on a still lake.

[H] A woman in a canoe on a still lake.

[LABEL] contradiction [PRED] contradiction [COEFF] 9.2593

[P] Man walking down a street.

[H] Woman walking down a street.

[LABEL] contradiction [PRED] contradiction [COEFF] 8.8239

[P] A man surfing in a blue watered ocean along a rock lined beach.

[H] A woman surfing in a blue watered ocean along a rock lined beach.

[LABEL] contradiction [PRED] contradiction [COEFF] 8.4362

[P] An asian man doing work on the shingles of a roof.

[H] A woman working on a roof

[LABEL] contradiction [PRED] contradiction [COEFF] 8.3007

[P] A young man about to throw a football.

[H] A young woman about to throw a football.

[LABEL] contradiction [PRED] contradiction [COEFF] 7.9186

[P] A man in a white t - shirt standing on scaffolding.

[H] A woman standing on scaffolding.

[LABEL] contradiction [PRED] contradiction [COEFF] 7.9109

[P] Man riding on a surfboard riding on a wave.

[H] Woman riding on a surfboard riding on a wave.

[LABEL] contradiction [PRED] contradiction [COEFF] 7.4679

[P] A man with safety ear covers working on wood.

[H] A woman working

[LABEL] contradiction [PRED] contradiction [COEFF] 7.4073

[P] A man steps off a rock outcropping in the desert.

[H] A woman steps off a rock outcropping in the desert.

[LABEL] contradiction [PRED] contradiction [COEFF] 7.2068

[P] A man checking clothing in the back of his car.

[H] A woman in her car.

[LABEL] contradiction [PRED] contradiction [COEFF] 7.1424

[P] Picture of a guy at a gas station.

[H] Picture of a woman

[LABEL] **contradiction** [PRED] **contradiction** [COEFF] 7.0545

[P] Man with mask on raises hand.

[H] Woman with mask on raises hand.

[LABEL] **contradiction** [PRED] **contradiction** [COEFF] 7.0274

[P] A man in black parasurfing in crisp, blue water.

[H] A woman in black parasurfing in crisp, blue water.

[LABEL] **contradiction** [PRED] **contradiction** [COEFF] 6.9829

[P] A bald man sitting on a stage playing a guitar.

[H] A woman sitting on a stage playing a guitar.

[LABEL] **contradiction** [PRED] **contradiction** [COEFF] 6.8640

[P] Man in white shirt selling refreshments outside on a kiosk.

[H] Woman in white shirt selling refreshments outside on a kiosk.

## 1.79 Component 78

[LABEL] **contradiction** [PRED] **contradiction** [COEFF] 8.7425

[P] A group of young people are playing band instruments in front of a crowd.

[H] The group is not playing anything but instead are watching tv.

[LABEL] **contradiction** [PRED] **contradiction** [COEFF] 7.4311

[P] A man is fastening his harness to a rope.

[H] The man is not tethered to anything.

[LABEL] **contradiction** [PRED] **contradiction** [COEFF] 7.1803

[P] A woman and girl dressed up in beautiful dresses walking down the sidewalk.

[H] The women are wearing nothing.

[LABEL] **contradiction** [PRED] **contradiction** [COEFF] 7.0834

[P] During a gay pride parade in an asian city, some people hold up rainbow flags to show support.

[H] The streets are empty and devoid of people.

[LABEL] **contradiction** [PRED] **contradiction** [COEFF] 6.8920

[P] A woman is on a red bike and has an orange and blue messenger bag over her shoulder.

[H] She don't have anything

[LABEL] **contradiction** [PRED] **contradiction** [COEFF] 6.4646

[P] A golfer wearing a blue and black jacket and black pants swings his golf club.

[H] The golfer wears no clothes and uses a baseball bat to hit a football.

[LABEL] **contradiction** [PRED] **contradiction** [COEFF] 6.3932

[P] A man sits on a red building smoking a cigarette and drinking.

[H] The man doesn't smoke at all.

[LABEL] **contradiction** [PRED] **contradiction** [COEFF] 6.2115

[P] An older woman wearing a dress and holding a handbag while standing in front of a hedge.

[H] Nobody has a dress.

[LABEL] **contradiction** [PRED] **contradiction** [COEFF] 6.1568

[P] Several old fashioned cars are parked together.

[H] The parking lot is filled with nothing but new electric cars.

[LABEL] **contradiction** [PRED] **contradiction** [COEFF] 6.0450

[P] Two men, both wearing bright yellow vests and jeans, are working on a roof.

[H] The men are sitting around doing nothing.

[LABEL] **contradiction** [PRED] **contradiction** [COEFF] 5.8370

[P] Two women gluing newspapers and putting them into a ball.

[H] The women are not folding up anything or creating a ball

[LABEL] **contradiction** [PRED] **contradiction** [COEFF] 5.8245

[P] Many people in a public area, many pushing children in strollers.

[H] The public area is empty

[LABEL] **contradiction** [PRED] **contradiction** [COEFF] 5.8014

[P] Elderly man opening up a gift in a living room setting with a younger relative nearby.

[H] The elderly man has no relatives.

[LABEL] **contradiction** [PRED] **contradiction** [COEFF] 5.7857

[P] A person wearing a long brown coat is taking a picture of a building while two other people stand by.

[H] Nobody has a coat

[LABEL] **contradiction** [PRED] **contradiction** [COEFF] 5.7747

[P] People in a foyer of a shopping mall with security guards on duty.

[H] The mall is empty.

[LABEL] **contradiction** [PRED] **contradiction** [COEFF] 5.7738

[P] People hanging about in a crowded cafe.

[H] Nobody is in the cafe

## 1.80 Component 79

[LABEL] **contradiction** [PRED] **contradiction** [COEFF] 8.8072

[P] Guy riding on motorized water equipment

[H] A woman is riding a boat.

[LABEL] contradiction [PRED] contradiction [COEFF] 8.6377

[P] A boy smiles for the camera at a beach.

[H] A girl is posing for a picture.

[LABEL] contradiction [PRED] contradiction [COEFF] 8.4130

[P] Man grilling hotdogs, buns, peppers and other foods while another man stands behind him posing.

[H] A woman is cooking.

[LABEL] contradiction [PRED] contradiction [COEFF] 8.3055

[P] Athletic man lifting steel free - weights at a gym.

[H] A woman is running on a treadmill.

[LABEL] contradiction [PRED] contradiction [COEFF] 7.5782

[P] The man is doing a trick on his green bike.

[H] A woman is riding a bike

[LABEL] contradiction [PRED] contradiction [COEFF] 7.5185

[P] One man sets up his pool shot during a tournament while onlookers watch.

[H] A woman prepares to take a pool shot.

[LABEL] contradiction [PRED] contradiction [COEFF] 7.2467

[P] A man in a black shirt is taking pictures in a crowd.

[H] A woman poses for pictures.

[LABEL] contradiction [PRED] contradiction [COEFF] 7.0715

[P] A man in blue jeans and a long - sleeved blue shirt bowling.

[H] A woman plays pool.

[LABEL] contradiction [PRED] contradiction [COEFF] 6.9062

[P] A man in an orange shirt is raising his golf club on a grassy course while five other men look on.

[H] A woman raises her club to take a shot in front of people.

[LABEL] contradiction [PRED] contradiction [COEFF] 6.6748

[P] Mexican man peddling fresh fruit.

[H] A woman sells fruit.

[LABEL] contradiction [PRED] contradiction [COEFF] 6.5534

[P] A man surfs by the golden gate bridge on a foggy day.

[H] The woman is surfing.

[LABEL] contradiction [PRED] contradiction [COEFF] 6.5190

[P] A man reading a book while floating in the water.

[H] Woman sunbathing.

[LABEL] contradiction [PRED] contradiction [COEFF] 6.5132

[P] A man jumping off a diving board into a pool.

[H] A girl goes for a swim

[LABEL] contradiction [PRED] contradiction [COEFF] 6.3871

[P] A guy in midair with skis and a helmet with clear blue skies in background.

[H] A woman is rollerblading.

[LABEL] contradiction [PRED] contradiction [COEFF] 6.2891

[P] A man is climbing up a post at a sporting event.

[H] A woman is raising a flag.

[LABEL] contradiction [PRED] contradiction [COEFF] 6.2096

[P] A male surfer catching a nice wave.

[H] A woman is surfing.

## 1.81 Component 80

[LABEL] contradiction [PRED] contradiction [COEFF] 7.6826

[P] A man drinks a beer while conversing with a woman.

[H] A man sits alone on a windy shore.

[LABEL] contradiction [PRED] contradiction [COEFF] 7.2320

[P] Two women, one wearing red and one wearing black, playing violins at a concert.

[H] Two women sat in silence at the church.

[LABEL] contradiction [PRED] contradiction [COEFF] 6.0274

[P] The little girl has heart shaped wings made out of long twisted balloons and is dressed in pink from head to toe.

[H] A older woman walks alone down a deserted street.

[LABEL] contradiction [PRED] contradiction [COEFF] 5.5164

[P] A group of people talking at tables.

[H] The people are sitting silently.

[LABEL] contradiction [PRED] contradiction [COEFF] 4.9358

[P] Two construction workers are talking with one another.

[H] The two men work in silence.

[LABEL] contradiction [PRED] contradiction [COEFF] 4.8518

[P] A family enjoys the outside.

[H] There is a scared looking man alone inspecting an empty pizza box as a single tear rolls down his cheek.

[LABEL] contradiction [PRED] contradiction [COEFF] 4.7966

[P] Four walmart shoppers in a deep discussion in the grocery section.

[H] Four shoppers sitting quietly on a bench.

[LABEL] contradiction [PRED] contradiction [COEFF] 4.6300

[P] A man is holding a long tool with a blade attached at the end.

[H] A man walks alone.

[LABEL] **contradiction** [PRED] **contradiction** [COEFF] 4.1202

[P] A woman in black dances with someone.

[H] A woman sits alone in a chair.

[LABEL] **contradiction** [PRED] **contradiction** [COEFF] 4.0042

[P] Band performing music in a nightclub.

[H] It is silent inside the nightclub.

[LABEL] **contradiction** [PRED] **contradiction** [COEFF] 3.9934

[P] A group of children are standing and talking together under trees.

[H] Children are sitting quietly in the desert.

[LABEL] **contradiction** [PRED] **contradiction** [COEFF] 3.9840

[P] A man, a man in a hat, and a woman in a hat look at papers as a cross - dressing asian man looks at them.

[H] Two men sit alone in a park

[LABEL] **contradiction** [PRED] **contradiction** [COEFF] 3.9654

[P] A man leaving the woman with an important message.

[H] A man relaxing in a hammock.

[LABEL] **contradiction** [PRED] **contradiction** [COEFF] 3.8478

[P] A dalmatian dog running downhill through leaves in a wooded area.

[H] A dog sits patiently for its owner.

[LABEL] **contradiction** [PRED] **contradiction** [COEFF] 3.7355

[P] A man wearing jeans and talking on the phone is standing on the sidewalk next to a blue spot on a building.

[H] A woman sits silently near a building.

[LABEL] **contradiction** [PRED] **contradiction** [COEFF] 3.7146

[P] A woman with a headband walking at the lead of a crowd, holding a sign saying " the rescue ".

[H] A woman sits alone in her bedroom.

## 1.82 Component 81

[LABEL] **entailment** [PRED] **entailment** [COEFF] 12.1520

[P] A man in a tan suit jacket looks at a plant.

[H] A man looks at a plant.

[LABEL] **entailment** [PRED] **entailment** [COEFF] 12.0407

[P] A man in a white shirt is making a speech into a microphone.

[H] A man is making a speech.

[LABEL] **entailment** [PRED] **entailment** [COEFF] 11.1706

[P] A man in a swimsuit stands under a boardwalk.

[H] A man is under a boardwalk.

[LABEL] entailment [PRED] entailment [COEFF] 10.9354

[P] A man in striped socks and a brown and white jumper is using some kind of object i can't identify properly.

[H] A man is using an object.

[LABEL] entailment [PRED] entailment [COEFF] 10.1412

[P] A man with a blue, white, and yellow shirt is balancing a ball.

[H] A man balances a ball.

[LABEL] entailment [PRED] entailment [COEFF] 10.0435

[P] A man with sunglasses, a white shirt and jeans is playing mini - golf.

[H] A man is playing golf.

[LABEL] entailment [PRED] entailment [COEFF] 9.8627

[P] A man is bending over to clean something.

[H] A man is cleaning.

[LABEL] entailment [PRED] entailment [COEFF] 9.8234

[P] A man in a sleeveless shirt is juggling burning objects.

[H] A man is juggling items.

[LABEL] entailment [PRED] entailment [COEFF] 9.5613

[P] A man in a plaid shirt is selling products to customers.

[H] A man is selling products

[LABEL] entailment [PRED] entailment [COEFF] 9.4191

[P] A man is singing into a microphone.

[H] A man sings a song.

[LABEL] entailment [PRED] entailment [COEFF] 9.4008

[P] A man in a white helmet and huge backpack is rock climbing.

[H] A man is rock climbing.

[LABEL] entailment [PRED] entailment [COEFF] 9.3826

[P] A man in a black shirt sings into a microphone.

[H] A man is singing.

[LABEL] entailment [PRED] entailment [COEFF] 9.3325

[P] A man in a black jacket is selling lottery tickets in the sidewalk.

[H] A man is selling tickets.

[LABEL] entailment [PRED] entailment [COEFF] 9.2691

[P] A man in a white shirt is wearing a hospital bracelet and holding a baby.

[H] A man holds an infant.

[LABEL] entailment [PRED] entailment [COEFF] 8.5204

[P] A man in a red shirt playing tennis.

[H] A man is playing tennis.

[LABEL] entailment [PRED] entailment [COEFF] 8.4196

[P] A man eating something with a spoon.

[H] A man is eating.

## 1.83 Component 82

[LABEL] contradiction [PRED] contradiction [COEFF] 17.5345

[P] A woman in a red shirt walking out onto a sidewalk.

[H] The dogs are barking inside the kennel

[LABEL] contradiction [PRED] contradiction [COEFF] 17.2289

[P] Two men working together at a construction site.

[H] The men are playing the drums at the concert.

[LABEL] contradiction [PRED] contradiction [COEFF] 17.1144

[P] Two women of asian descent are eating food at a restaurant.

[H] A young couple is waiting in line to be married by elvis.

[LABEL] contradiction [PRED] contradiction [COEFF] 16.2768

[P] Two elderly women are sitting on a bench and conversing.

[H] A girl eats snickers

[LABEL] contradiction [PRED] contradiction [COEFF] 16.2467

[P] A group of boys walking along a highway by a nearby school.

[H] A group of boys are poking a dead body with a stick.

[LABEL] contradiction [PRED] contradiction [COEFF] 15.9766

[P] Two people are looking at a fancy motorcycle while a woman inside a restaurant is looking at them.

[H] The dogs were barking at bill and ted.

[LABEL] contradiction [PRED] contradiction [COEFF] 15.9723

[P] Woman wearing black snow pants and jacket, walking down a snowy hill.

[H] The fish sticks are tasty

[LABEL] contradiction [PRED] neutral [COEFF] 15.4526

[P] Many people getting up stairs.

[H] The people are watching a baseball game.

[LABEL] contradiction [PRED] contradiction [COEFF] 15.3706

[P] A man and woman sit at the end of a small dock along the water.

[H] The dog eats the bone



[LABEL] **contradiction** [PRED] **neutral** [COEFF] 15.3074  
 [P] An airline flight crew member stands by the steps to an airliner.  
 [H] The passenger sips coffee at a cafe

[LABEL] **contradiction** [PRED] **contradiction** [COEFF] 15.2825  
 [P] A beagle dog is walking on the shoreline at the beach.  
 [H] A dog is excited when his owner fills his food bowl.

[LABEL] **contradiction** [PRED] **contradiction** [COEFF] 15.0395  
 [P] A mother and nurse pose with a newly - born infant.  
 [H] The mother is eating pizza.

[LABEL] **contradiction** [PRED] **neutral** [COEFF] 14.7882  
 [P] Young girls at a pool on a bright, sunny day.  
 [H] Some girls are dancing ballet inside.

[LABEL] **contradiction** [PRED] **contradiction** [COEFF] 14.5928  
 [P] Mountain biker riding on a dirt path with two people watching in the background.  
 [H] The girl is looking at the diamond ring in the case.

[LABEL] **contradiction** [PRED] **contradiction** [COEFF] 14.1461  
 [P] Crowd gathers at a local bar.  
 [H] A boy sits next to the cat.

[LABEL] **contradiction** [PRED] **contradiction** [COEFF] 14.0077  
 [P] A group of children dance and play instruments under colored lights.  
 [H] The old man is playing a banjo.

## 1.84 Component 83

[LABEL] **entailment** [PRED] **entailment** [COEFF] 11.4725  
 [P] Marathon on wheels to help victim of breast cancer.  
 [H] A marathon is helping victims of breast cancer.

[LABEL] **entailment** [PRED] **entailment** [COEFF] 11.0670  
 [P] An asian child eating something.  
 [H] A child has a meal.

[LABEL] **entailment** [PRED] **entailment** [COEFF] 10.2367  
 [P] A boat with one sail is being steered in calm water.  
 [H] A boat is on the water.

[LABEL] **entailment** [PRED] **entailment** [COEFF] 10.0821  
 [P] Items are being sold in the open market by it's vendors.  
 [H] Vendors are selling in the market.

[LABEL] entailment [PRED] entailment [COEFF] 10.0255  
[P] A couple holds up their child on a series of large steps while others are also traversing the steps.  
[H] People walk up steps.

[LABEL] entailment [PRED] entailment [COEFF] 9.8870  
[P] People are socializing as they take several drinks.  
[H] The group is consuming beverages.

[LABEL] entailment [PRED] entailment [COEFF] 9.7721  
[P] Women who look alike are performing on a stage.  
[H] People are on a stage performing.

[LABEL] entailment [PRED] entailment [COEFF] 9.4855  
[P] Four young children pose in formally for an informal picture.  
[H] Some children are taking a picture

[LABEL] entailment [PRED] entailment [COEFF] 9.2717  
[P] Two women wearing red are standing.  
[H] Women are standing.

[LABEL] entailment [PRED] entailment [COEFF] 8.8758  
[P] A group of women are performing on a basketball court floor.  
[H] Women performing

[LABEL] entailment [PRED] entailment [COEFF] 8.8013  
[P] A man and a woman on a path.  
[H] People on a path.

[LABEL] entailment [PRED] entailment [COEFF] 8.6456  
[P] The table is set with many types of food.  
[H] The table has food on it

[LABEL] entailment [PRED] entailment [COEFF] 8.5147  
[P] A black dog running in a race.  
[H] A dog is racing.

[LABEL] entailment [PRED] entailment [COEFF] 8.5006  
[P] Group of people by a lake.  
[H] People are at a lake

[LABEL] entailment [PRED] entailment [COEFF] 8.3702  
[P] People looking at books in a store.  
[H] People are in a store

[LABEL] entailment [PRED] entailment [COEFF] 8.2842  
[P] A young child eats a small cake.

[H] Young child eats a small cake

## 1.85 Component 84

[LABEL] **entailment** [PRED] **entailment** [COEFF] 40.7720

[P] A group of people wearing white, orange and yellow outfits pose for a picture with a burning effigy in the background.

[H] A group of people wear colorful outfits.

[LABEL] **entailment** [PRED] **entailment** [COEFF] 28.4904

[P] There are two men here at the center of the picture wearing red tie dye shirts and metal helmets topped with lit burners.

[H] Two men are wearing colorful shirts and helmets.

[LABEL] **entailment** [PRED] **entailment** [COEFF] 26.5838

[P] Two people in bright orange coats are working on some piece of equipment that is dealing with a train.

[H] A couple of brightly - dressed people are doing something with a vehicle.

[LABEL] **entailment** [PRED] **entailment** [COEFF] 24.6242

[P] A boy in a blue shirt smiles as he sits with his red stuffed animal.

[H] A little boy in blue has a crimson toy. he looks happy.

[LABEL] **entailment** [PRED] **entailment** [COEFF] 24.3466

[P] Woman stands against wall filled with old advertisements wearing a short white shirt with jean jacket and skirt.

[H] A dressed woman is close to a wall.

[LABEL] **neutral** [PRED] **entailment** [COEFF] 24.0466

[P] Lady in red holding striped tube in front crowd of people.

[H] Lady wearing colorful outfit in front of a crowd.

[LABEL] **entailment** [PRED] **entailment** [COEFF] 21.2950

[P] Two beautiful dances are performing with brilliant red costumes and props.

[H] Colorful costumes are used in a set of two dances.

[LABEL] **entailment** [PRED] **entailment** [COEFF] 20.6952

[P] An adult dressed in black holds a stick.

[H] A stick is being held by a person in dark clothing.

[LABEL] **neutral** [PRED] **entailment** [COEFF] 19.4231

[P] A man with wild hair rocks a show playing a guitar center stage.

[H] One crazy looking man plays in a show.

[LABEL] **entailment** [PRED] **entailment** [COEFF] 19.1750

[P] People in a parade wearing multicolored clothes and dancing.

[H] The parade has colorful people.

[LABEL] entailment [PRED] entailment [COEFF] 18.8234

[P] A basketball player in a white jersey with the word price on it, posting up against another player in a blue uniform.

[H] A player dressed in white

[LABEL] neutral [PRED] entailment [COEFF] 18.7055

[P] A woman skiing down a snowy mountain with a brown dog on a lesh running with her

[H] A woman and a fuzzy dog on a mountain.

[LABEL] entailment [PRED] entailment [COEFF] 18.3910

[P] Young boy in a red shirt and white socks jumps down an inflatable slide.

[H] A person in clothing

[LABEL] entailment [PRED] entailment [COEFF] 17.5552

[P] A little asian boy has on a green shirt, while holding a small green shovel.

[H] A child holds a small colourful tool.

[LABEL] entailment [PRED] entailment [COEFF] 16.9129

[P] A man in a cream blazer and fedora plays the saxophone.

[H] A man in a jacket is playing an instrument.

[LABEL] entailment [PRED] entailment [COEFF] 16.8779

[P] A man who wearing blue color jacket and light green color trouser is cleaning his fishing nets after went for fishing.

[H] A man in fishing gear is cleaning up.

## 1.86 Component 85

[LABEL] entailment [PRED] entailment [COEFF] 17.1681

[P] A person is flying through the air attached to a board with a parachute.

[H] Person flying

[LABEL] entailment [PRED] entailment [COEFF] 16.6701

[P] A woman with two braids riding a bike, wearing a helmet and blue and yellow bike gear.

[H] Woman on bike

[LABEL] entailment [PRED] entailment [COEFF] 16.3652

[P] A woman wearing brown boots and holding a red cup walks through a large outdoor crowd.

[H] Woman walking through crowd

[LABEL] entailment [PRED] entailment [COEFF] 15.9532

[P] A man with glasses and black coat pushing a cart full of bags on a travelator.

[H] Man pushing cart

[LABEL] entailment [PRED] entailment [COEFF] 15.5082

[P] A man in a brownish green shirting playing guitar singing into a microphone

[H] Man singing

[LABEL] **entailment** [PRED] **entailment** [COEFF] 14.4808  
[P] A group of young people are hanging out together outside in a commercial area.  
[H] People hanging out

[LABEL] **entailment** [PRED] **entailment** [COEFF] 14.3248  
[P] Three people walk down a sidewalk on an empty city street.  
[H] People walking

[LABEL] **entailment** [PRED] **entailment** [COEFF] 14.2633  
[P] Two women, one in a black and gold dress and one in a black and red outfit, dance with their backs turned and their left hands upraised.  
[H] Women dancing

[LABEL] **entailment** [PRED] **entailment** [COEFF] 13.5539  
[P] A group of women are performing on a basketball court floor.  
[H] Women performing

[LABEL] **neutral** [PRED] **entailment** [COEFF] 12.9041  
[P] A little boy jumps high off his bed.  
[H] Boy jumppping

[LABEL] **entailment** [PRED] **entailment** [COEFF] 12.8003  
[P] Two men, one bare - chested while the other wears a hat and blue shirt, in a canoe on water.  
[H] Men in canoe

[LABEL] **entailment** [PRED] **entailment** [COEFF] 12.4586  
[P] A young man raises his arms as he marches in a parade.  
[H] Young man marching

[LABEL] **entailment** [PRED] **entailment** [COEFF] 12.3354  
[P] Two young girls are riding a large bicycle on the side of the road.  
[H] Girls on bike

[LABEL] **entailment** [PRED] **entailment** [COEFF] 12.3020  
[P] A young woman fishing off a dock at sunset.  
[H] Woman fishing.

[LABEL] **entailment** [PRED] **entailment** [COEFF] 12.2329  
[P] A male soldier in green military fatigues, inspecting an old, metal weapon, placed on a bed of grass.  
[H] A person inspecting

[LABEL] **entailment** [PRED] **entailment** [COEFF] 12.1612  
[P] Someone wearing a white and blue uniform is riding a mountain bike on a bumpy trail  
[H] Person on bike

## 1.87 Component 86

[LABEL] **neutral** [PRED] **neutral** [COEFF] 50.5274

[P] A well dressed man playing a flaming tuba.

[H] The man is playing his tuba for a crowd.

[LABEL] **neutral** [PRED] **neutral** [COEFF] 40.0719

[P] An asian long - haired man wearing a yellow hat long - sleeved shirt talking on a microphone

[H] An asian man wearing a yellow hat is talking on a microphone to a large crowd.

[LABEL] **neutral** [PRED] **neutral** [COEFF] 36.4186

[P] A band performs on stage under a blue light.

[H] A band is performing for a large audience.

[LABEL] **neutral** [PRED] **neutral** [COEFF] 35.5099

[P] The man in the yellow shirt is singing and playing guitar.

[H] A man is playing guitar and singing to a large audience.

[LABEL] **neutral** [PRED] **neutral** [COEFF] 34.2851

[P] A guy in a baseball uniform throwing a pitch.

[H] The man is in front of a large crowd.

[LABEL] **neutral** [PRED] **neutral** [COEFF] 31.3694

[P] A man wearing a black jacket is playing guitar.

[H] The man plays the guitar for an audience.

[LABEL] **neutral** [PRED] **neutral** [COEFF] 29.8395

[P] A musician is playing an electric violin before an energy drink advertisement.

[H] A crowd of people is watching the man play.

[LABEL] **neutral** [PRED] **neutral** [COEFF] 27.5389

[P] A group of actors and actresses are performing in a play.

[H] The actors and actresses are performing in front of a large crowd.

[LABEL] **neutral** [PRED] **neutral** [COEFF] 26.2687

[P] A man is playing a guitar and talking or singing into a microphone.

[H] A man is playing to a small audience.

[LABEL] **neutral** [PRED] **neutral** [COEFF] 25.9362

[P] Musician plays a white electric guitar with a band at an outdoor concert

[H] The band is playing for a large crowd.

[LABEL] **neutral** [PRED] **neutral** [COEFF] 25.8394

[P] A indian women displaying her cultural heritage with painted red fingers and an extravagant head piece.

[H] A woman shows off to a crowd of people.

[LABEL] **neutral** [PRED] **neutral** [COEFF] 25.7422

[P] A man with a red shirt and black hat suspends himself in the air by sitting on a pole and clinging to two wires with his hands.

[H] A man performs a stunt for an audience.

[LABEL] **neutral** [PRED] **neutral** [COEFF] 24.9903

[P] A breakdancer in red and black is pictured while in the middle of a complex move.

[H] A breakdancer is pictured while doing a complex move in front of a group of cheering people.

[LABEL] **neutral** [PRED] **neutral** [COEFF] 24.4864

[P] A young lady with a pink shirt and white hat is standing on her horse with her hand over her heart.

[H] The young lady is performing with her horse for a big crowd.

[LABEL] **neutral** [PRED] **neutral** [COEFF] 24.1991

[P] A man wearing a white cap standing a platform.

[H] The man is delivering a speech

[LABEL] **neutral** [PRED] **neutral** [COEFF] 23.7115

[P] Two men perform a song together on stage.

[H] The two men are singing a popular song.

## 1.88 Component 87

[LABEL] **contradiction** [PRED] **contradiction** [COEFF] 9.4649

[P] Two female musicians are on outdoor stage at night.

[H] Two men musicians are performing inside on a stage during the day.

[LABEL] **contradiction** [PRED] **contradiction** [COEFF] 8.5334

[P] A group of people walking outside a theme park in the middle of the day.

[H] People are indoors.

[LABEL] **contradiction** [PRED] **contradiction** [COEFF] 7.9753

[P] A singer on a smoke filled stage in front of an audience.

[H] A person is sleeping.

[LABEL] **contradiction** [PRED] **contradiction** [COEFF] 7.7659

[P] A man and woman are kissing and hugging while wearing helmets.

[H] People are at home sleeping

[LABEL] **contradiction** [PRED] **contradiction** [COEFF] 7.2484

[P] People are walking across the street of a city.

[H] There are people sitting

[LABEL] **contradiction** [PRED] **contradiction** [COEFF] 7.1782

[P] A bus filled with passengers in chicago at night.

[H] The people are on a bus at day.

[LABEL] contradiction [PRED] contradiction [COEFF] 6.4565

[P] Many people are walking along a path next to a long building and trees.

[H] A person walks past a small building alone.

[LABEL] contradiction [PRED] contradiction [COEFF] 6.4204

[P] Women wearing long shirts playing music.

[H] Women wearing short shirts read books.

[LABEL] contradiction [PRED] contradiction [COEFF] 6.3847

[P] 3 police are on skates in the city center.

[H] The child is sleep

[LABEL] contradiction [PRED] contradiction [COEFF] 6.1611

[P] A woman gives the thumbs up over the slope.

[H] There is a man giving a thumbs down.

[LABEL] contradiction [PRED] contradiction [COEFF] 6.1060

[P] A woman giving a presentation using a slideshow projection.

[H] There is a man giving a presentation using a slideshow projection.

[LABEL] contradiction [PRED] contradiction [COEFF] 5.6686

[P] The people in this photo appear to be running or walking.

[H] There are people sitting at home in chairs.

[LABEL] contradiction [PRED] contradiction [COEFF] 5.5282

[P] Woman walking, one with a blue tank on and one with a flowered tank on.

[H] Two women are sleeping.

[LABEL] contradiction [PRED] contradiction [COEFF] 5.4769

[P] Two soccer players wait to compete on an outdoor field in front of a crowd of people watching in the stands in the background.

[H] The crowd is indoors.

[LABEL] contradiction [PRED] contradiction [COEFF] 5.4629

[P] Two women and a man dressed in victorian era clothing ; the man is gesturing to the women in the red dress.

[H] Three people are wearing modern clothes.

[LABEL] contradiction [PRED] contradiction [COEFF] 5.3726

[P] Children are playing with leaves in the autumn.

[H] Children play in the snow in winter.

## 1.89 Component 88

[LABEL] contradiction [PRED] contradiction [COEFF] 17.5320

[P] A man with a microphone reads from a piece of paper as he stands in front of two men holding tubas.

[H] Three people are swimming in a lake



[LABEL] contradiction [PRED] contradiction [COEFF] 16.7292

[P] A black and white dog running from under a yellow cover with a person behind them.

[H] A goldfish swims in a bowl.

[LABEL] contradiction [PRED] contradiction [COEFF] 13.1920

[P] Fans watching a basketball game indoors at a stadium.

[H] People are swimming at the beach.

[LABEL] contradiction [PRED] contradiction [COEFF] 12.6740

[P] A soccer player in a yellow jersey heads a soccer ball while a player in an orange jersey is in close pursuit.

[H] The women are swimming in a lake.

[LABEL] contradiction [PRED] contradiction [COEFF] 12.5732

[P] A woman is sitting at a table waiting to tell a customer's fortune.

[H] A skier crashes into a tree.

[LABEL] contradiction [PRED] contradiction [COEFF] 11.3457

[P] Black school boys in uniforms make deals with a white man under the garage door.

[H] The boys and man are at the beach surfing.

[LABEL] contradiction [PRED] contradiction [COEFF] 10.7531

[P] A man wearing a train conductor's uniform standing inside an old train or trolley car.

[H] A man throws a beach ball to his girlfriend.

[LABEL] contradiction [PRED] contradiction [COEFF] 10.7280

[P] A black homeless male sleeps on a wall.

[H] The little baby is swimming.

[LABEL] contradiction [PRED] contradiction [COEFF] 10.4839

[P] A female harp player peers through the middle of her instrument while performing.

[H] A woman is swimming in a lake.

[LABEL] contradiction [PRED] contradiction [COEFF] 10.0073

[P] Four guys with backpacks walk along a trail next to a large mountain.

[H] Girls are swimming in the lake.

[LABEL] contradiction [PRED] contradiction [COEFF] 9.9775

[P] Construction workers are working at a train or subway platform.

[H] The men are playing volleyball down by the ocean.

[LABEL] contradiction [PRED] contradiction [COEFF] 9.1752

[P] A man and woman share a meal at a table.

[H] The two people are jogging on treadmills.

[LABEL] contradiction [PRED] contradiction [COEFF] 9.1416

[P] A brown - haired man with glasses is wearing a burgundy hooded sweatshirt while sitting at a dinner table checking his cellphone.

[H] A man is riding a turtle through the jungle.

[LABEL] **contradiction** [PRED] **contradiction** [COEFF] 9.0856

[P] A blond woman is singing on stage.

[H] A bird flies over the lake.

[LABEL] **contradiction** [PRED] **contradiction** [COEFF] 8.9440

[P] Long - haired man works in a white room.

[H] A girl walks on the beach.

[LABEL] **contradiction** [PRED] **contradiction** [COEFF] 8.6351

[P] The ball boys are waiting on the side lines of the tennis court while they watch the lady hitting the ball.

[H] Two boys are swimming in an ocean.

## 1.90 Component 89

[LABEL] **entailment** [PRED] **entailment** [COEFF] 6.9545

[P] A group of runners standing in front of a red car in europe.

[H] A group of people standing in front of a car.

[LABEL] **entailment** [PRED] **entailment** [COEFF] 6.6605

[P] Flames at gas pumps engulf a red car.

[H] Flames at gas pumps engulf a car.

[LABEL] **entailment** [PRED] **entailment** [COEFF] 6.5480

[P] A group of three people, one of them a young boy, are standing in front of a large aquarium like fish tank looking at the fish.

[H] A group of people stand in front of an aquarium.

[LABEL] **entailment** [PRED] **entailment** [COEFF] 6.5340

[P] A couple kissing in front of a black mercedes benz limousine

[H] A couple kissing in front of a car

[LABEL] **entailment** [PRED] **entailment** [COEFF] 5.8549

[P] Three men in black uniforms carrying trays of food in a restaurant kitchen.

[H] Three men wearing black carrying trays of food.

[LABEL] **entailment** [PRED] **entailment** [COEFF] 5.7195

[P] Three people are sitting at an outdoor table in front of a coffee shop.

[H] Three people sit outside at a table

[LABEL] **entailment** [PRED] **entailment** [COEFF] 5.7109

[P] Two police officers in bright yellow uniforms are standing and talking to one another.

[H] Two police officers stand and talk to each other.

[LABEL] entailment [PRED] entailment [COEFF] 5.6540  
[P] A man in a blue jacket is walking passed a blue pay phone.  
[H] A man walks by a phone.

[LABEL] entailment [PRED] entailment [COEFF] 5.6222  
[P] The dog is wearing a red baseball cap, and has its mouth wide open.  
[H] The dog is wearing a baseball cap, and has its mouth wide open.

[LABEL] entailment [PRED] entailment [COEFF] 5.3768  
[P] A man flies through the air on his skateboard above a white staircase.  
[H] A man catches air on a skateboard above a staircase.

[LABEL] entailment [PRED] entailment [COEFF] 5.2017  
[P] Two women standing in front of a building with bright graffiti underneath a sign that reads " downtown.  
"  
[H] Two women stand in front of a building with bright graffiti.

[LABEL] entailment [PRED] entailment [COEFF] 5.1081  
[P] Two boys are running on a path amoung green leafy trees.  
[H] Two boys are running past trees.

[LABEL] entailment [PRED] entailment [COEFF] 5.0812  
[P] A group of people running a bicycle race past a red building.  
[H] A bunch of people run past a building

[LABEL] entailment [PRED] entailment [COEFF] 5.0111  
[P] Two men, standing on the sidewalk in front of a very tall, red and blue art piece.  
[H] Two men stand by some art.

[LABEL] entailment [PRED] entailment [COEFF] 4.8803  
[P] Two brown dogs are wearing muzzles and running very fast through the grass.  
[H] Two dogs are running through the field.

[LABEL] entailment [PRED] entailment [COEFF] 4.8228  
[P] Three people in casual clothes walk in front of a gray building.  
[H] Three people are walking in front of a building

## 1.91 Component 90

[LABEL] entailment [PRED] entailment [COEFF] 17.5953  
[P] A teenager poses with an orange ford mustang in a parking lot with a mountain backdrop.  
[H] A person is posing with a car outside.

[LABEL] entailment [PRED] entailment [COEFF] 16.0316  
[P] A young child stands in a path in a field of sunflowers.  
[H] There is a child standing outdoors.

[LABEL] entailment [PRED] entailment [COEFF] 14.5274  
[P] Two men are roasting marshmallows outside at a campfire.  
[H] Two men roasting marshmallows outdoors.

[LABEL] entailment [PRED] entailment [COEFF] 14.3667  
[P] A man and a woman are getting married outdoors.  
[H] A man and a woman are getting married outside.

[LABEL] entailment [PRED] entailment [COEFF] 14.1134  
[P] A toddler is sitting at a table eating a snack.  
[H] A child is eating a snack.

[LABEL] entailment [PRED] entailment [COEFF] 14.0344  
[P] A boy with scruffy, dark hair is skateboarding on the sidewalk.  
[H] The dark - haired lad is skateboarding outside.

[LABEL] entailment [PRED] entailment [COEFF] 13.9205  
[P] An overweight man wears a protective hat and gloves.  
[H] A heavy set man is wearing protective gear.

[LABEL] entailment [PRED] entailment [COEFF] 13.6501  
[P] A girl in street clothes playing soccer in a grassy field.  
[H] A child plays outdoors.

[LABEL] entailment [PRED] entailment [COEFF] 13.6470  
[P] A man is training his dog in the field near the homes.  
[H] A man training his dog outdoors.

[LABEL] entailment [PRED] entailment [COEFF] 13.2068  
[P] A woman dancing on the beach, with the ocean in the background.  
[H] A woman dancing by the shore.

[LABEL] entailment [PRED] entailment [COEFF] 12.8683  
[P] A very thin man is sleeping on the street.  
[H] A man is sleeping outside.

[LABEL] entailment [PRED] entailment [COEFF] 12.8389  
[P] A surfboarder emerging from the ocean with his board, as the waves crash ashore behind him.  
[H] A surfer is coming out from the water onto the beach.

[LABEL] entailment [PRED] entailment [COEFF] 12.1608  
[P] A yellow robot and young girl touch each other's hands.  
[H] The machine and child touch hands.

[LABEL] entailment [PRED] entailment [COEFF] 12.0086  
[P] A man in a blue shirt is sitting on a doorstep talking on his cellphone.

[H] A man is outside on the phone.

[LABEL] **entailment** [PRED] **entailment** [COEFF] 11.8331

[P] A woman in a red coat takes a picture near marble columns at twilight.

[H] The woman is taking pictures at night.

[LABEL] **entailment** [PRED] **entailment** [COEFF] 11.7850

[P] A man in a suit is hurrying across the street.

[H] A man in crossing the street.

## 1.92 Component 91

[LABEL] **neutral** [PRED] **contradiction** [COEFF] 30.6523

[P] A blond woman wearing sunglasses on the top of her head.

[H] A woman cannot locate her sunglasses and thinks she lost them.

[LABEL] **contradiction** [PRED] **contradiction** [COEFF] 29.8175

[P] A man with glasses is playing his instrument in a small crowd of people that includes another man in a suit with a trumpet.

[H] The man forgot to bring his instrument today.

[LABEL] **contradiction** [PRED] **contradiction** [COEFF] 29.7202

[P] A boy in swimming trunks is splashing in a swimming pool.

[H] The little boy is too scared to get in the pool.

[LABEL] **neutral** [PRED] **neutral** [COEFF] 29.2731

[P] A black guy in an apron grilling cornstalks.

[H] A black guy is not very good at cooking.

[LABEL] **neutral** [PRED] **neutral** [COEFF] 28.4092

[P] A red cone on the side of a street.

[H] The cone felt abandoned after driving classes had been eternally abolished, but couldn't speak its mind to just anyone.

[LABEL] **neutral** [PRED] **neutral** [COEFF] 28.2044

[P] An asian man attempts to put out a wildfire with a small wooden bucket.

[H] The wildfire is too far spread and he cant do anything to help

[LABEL] **entailment** [PRED] **neutral** [COEFF] 27.6803

[P] A boy sitting on the floor looking up at a woman in a green chair.

[H] The boy is smaller than the woman

[LABEL] **contradiction** [PRED] **contradiction** [COEFF] 27.3318

[P] An airline stewardess is carefully rolling her drink cart down the aisle.

[H] The stewardess isn't paying attention to where she's going.

[LABEL] **neutral** [PRED] **neutral** [COEFF] 27.3229

[P] A man sits on a bicycle harnessed to a metal pole.

[H] The man had forgotten to consider bike locks in his theft plan.

[LABEL] **neutral** [PRED] **contradiction** [COEFF] 27.1016

[P] A child with a blue shirt on holding a fishing pole.

[H] The child has never been fishing before.

[LABEL] **contradiction** [PRED] **contradiction** [COEFF] 26.9538

[P] A small brown and black dog plays with a colorful caterpillar toy on a tan burbur carpet.

[H] These two dogs are not paying attention to anything.

[LABEL] **neutral** [PRED] **neutral** [COEFF] 26.8720

[P] Two old men in bathing suits and swim caps on the edge of the water on a beach.

[H] Two old men are taking a break from swimming at the beach.

[LABEL] **contradiction** [PRED] **neutral** [COEFF] 26.4913

[P] Smiling boy in white shirt and blue jeans in front of rock wall with man in overalls behind him.

[H] The rock wall does not seem interesting to the people.

[LABEL] **neutral** [PRED] **neutral** [COEFF] 26.4822

[P] A boy holds the bat waiting for the pitch at a baseball game.

[H] The boy will miss the ball

[LABEL] **neutral** [PRED] **neutral** [COEFF] 26.4806

[P] A toddler in a white shirt is standing in front of a blue kid's bike.

[H] The bicycle is missing its chain.

[LABEL] **contradiction** [PRED] **contradiction** [COEFF] 26.3806

[P] City workers doing repairs.

[H] The workers are not working today.

## 1.93 Component 92

[LABEL] **contradiction** [PRED] **contradiction** [COEFF] 9.2502

[P] The elderly lady waits on the sidewalk.

[H] An old woman getting on the bus.

[LABEL] **contradiction** [PRED] **contradiction** [COEFF] 6.5339

[P] A smiling woman stands in front of a body of water with water birds.

[H] A woman is on a train.

[LABEL] **contradiction** [PRED] **contradiction** [COEFF] 6.3887

[P] One slender man and one stout man walk on a city sidewalk.

[H] The two guys are at a bar.

[LABEL] **contradiction** [PRED] **contradiction** [COEFF] 5.9810

[P] A woman in a white top runs along a tree lined path.

[H] A woman is riding a bike.

[LABEL] **contradiction** [PRED] **contradiction** [COEFF] 5.8698

[P] A child standing crouched on a tree limb.

[H] The child is in a wheelchair and cant climb trees

[LABEL] **contradiction** [PRED] **contradiction** [COEFF] 5.6145

[P] Asian people standing inside a business.

[H] A group of asian people riding on a train.

[LABEL] **contradiction** [PRED] **contradiction** [COEFF] 5.5854

[P] A man is doing art on a sidewalk while many other people walk by.

[H] A man paints in a studio.

[LABEL] **contradiction** [PRED] **contradiction** [COEFF] 5.5448

[P] A group of female athletes taking a break on the bench.

[H] A group of female athletes are playing in the snow.

[LABEL] **neutral** [PRED] **contradiction** [COEFF] 5.5072

[P] A group of people walking in front of a large building.

[H] A group of people leaving work.

[LABEL] **contradiction** [PRED] **contradiction** [COEFF] 5.1423

[P] A man standing next an older silver van.

[H] A man is sitting in a cafe.

[LABEL] **contradiction** [PRED] **contradiction** [COEFF] 5.0959

[P] Young man with cap and buttoned coat stands before building.

[H] The young man is in shorts and a t - shirt while mowing the lawn

[LABEL] **contradiction** [PRED] **contradiction** [COEFF] 5.0948

[P] A group parades through the streets of a city holding flags and signs.

[H] People are sitting on a cruise ship.

[LABEL] **contradiction** [PRED] **contradiction** [COEFF] 5.0909

[P] A man standing next an older silver van.

[H] A man sleeps on a bus

[LABEL] **contradiction** [PRED] **contradiction** [COEFF] 5.0889

[P] A woman with a bright orange backpack is standing in front of a stairway.

[H] A woman is swimming in the ocean.

[LABEL] **contradiction** [PRED] **contradiction** [COEFF] 5.0043

[P] A man wearing a flannel shirt is smiling at the camera while walking his horse.

[H] A man is feeding a pig.

[LABEL] contradiction [PRED] contradiction [COEFF] 4.9636  
[P] A man is walking in front of a building with an arrow pointing in the opposite direction.  
[H] The man is flying an airplane.

## 1.94 Component 93

[LABEL] contradiction [PRED] contradiction [COEFF] 17.7098  
[P] A man standing on the sidewalk looking at glass bottles for sale.  
[H] A dog plays with a pig in some mud.

[LABEL] contradiction [PRED] contradiction [COEFF] 16.6462  
[P] A woman standing in front of a couple of vending machines.  
[H] A dog plays with a pig in some mud.

[LABEL] contradiction [PRED] contradiction [COEFF] 15.7534  
[P] A man stands and speaks to a group of seated, elderly people.  
[H] A dog is sleeping next to a cat.

[LABEL] contradiction [PRED] contradiction [COEFF] 15.6721  
[P] A man is walking through the courtyard of an old building.  
[H] A donkey in the wild

[LABEL] contradiction [PRED] contradiction [COEFF] 15.6531  
[P] A child in a red snowsuit plays with snow.  
[H] A dog sleeps by the fire.

[LABEL] contradiction [PRED] contradiction [COEFF] 15.0077  
[P] A person in a red hat, tie - dye purple shirt and black pants stands on a walkway.  
[H] A dog snoozing in the sun.

[LABEL] contradiction [PRED] contradiction [COEFF] 14.6222  
[P] A woman in a black shirt is standing next to the public toilets.  
[H] A dog is playing in the sink.

[LABEL] contradiction [PRED] contradiction [COEFF] 14.5038  
[P] A man in an orange shirt is using a mac computer.  
[H] A puppy is sitting.

[LABEL] contradiction [PRED] contradiction [COEFF] 13.4158  
[P] A man and a woman are making two bowls of salad together.  
[H] A kitten plays with a toy.

[LABEL] contradiction [PRED] contradiction [COEFF] 13.2002  
[P] A man is standing behind gears watching something.  
[H] A dog is seen watching tv.



[LABEL] contradiction [PRED] contradiction [COEFF] 13.1300

[P] Two children and a man on a boulder.

[H] A dog sits by the lake.

[LABEL] contradiction [PRED] contradiction [COEFF] 12.1387

[P] A woman in blue wearing flip - flops touches a passing car while walking beside a young man in a green striped shirt.

[H] A dog runs up a big hill to meet its master.

[LABEL] contradiction [PRED] contradiction [COEFF] 12.1052

[P] Three youngsters playing on their cellphones at a dinner table.

[H] A dog is running through a field.

[LABEL] contradiction [PRED] contradiction [COEFF] 11.9881

[P] Blond child sitting in a chair in front of an old typewriter.

[H] A dog and a pig play in some mud.

[LABEL] contradiction [PRED] contradiction [COEFF] 10.9473

[P] Two dogs, one light brown and one gray, play outdoors on the grass.

[H] A dolphin is playing in the water.

[LABEL] contradiction [PRED] contradiction [COEFF] 10.8239

[P] A man sitting on his backpack on the sidewalk.

[H] A dog and a pig play in some mud.

## 1.95 Component 94

[LABEL] contradiction [PRED] contradiction [COEFF] 9.4952

[P] Three men sit on top of a green tank.

[H] The three men are on top of a tree.

[LABEL] contradiction [PRED] contradiction [COEFF] 8.3463

[P] Two young women sitting on a doorstep.

[H] Two old women are sitting on the doorstep.

[LABEL] contradiction [PRED] contradiction [COEFF] 8.1863

[P] People waiting to get on a train.

[H] A group of people are on a plane.

[LABEL] contradiction [PRED] contradiction [COEFF] 8.1494

[P] Two males running, one wearing red and white, the other navy blue and black, outside on a cloudy day.

[H] Two males sitting.

[LABEL] neutral [PRED] contradiction [COEFF] 8.1239

[P] A person skiing down a very large snow covered mountain.

[H] A person is skiing down a short mountain.

[LABEL] contradiction [PRED] contradiction [COEFF] 7.9621

[P] White car driving in an empty parking lot

[H] The car is in a crowded lot

[LABEL] contradiction [PRED] contradiction [COEFF] 7.6465

[P] A young girl is sitting down in a chair watching something.

[H] A girl is standing.

[LABEL] contradiction [PRED] contradiction [COEFF] 7.6283

[P] A girl with bright red - hair and black clothes is posing on a tree trunk.

[H] A girl sits on a curb.

[LABEL] contradiction [PRED] contradiction [COEFF] 7.5975

[P] Some people looking out windows in a large building.

[H] The people are in a small building

[LABEL] contradiction [PRED] contradiction [COEFF] 7.4095

[P] Two girls with long hair jumping on a trampoline.

[H] There are two boys with short hair jumping on the trampoline.

[LABEL] contradiction [PRED] contradiction [COEFF] 7.3506

[P] Two boys are running on a path among green leafy trees.

[H] Two boys are sleeping on a house.

[LABEL] contradiction [PRED] contradiction [COEFF] 7.3329

[P] A young boy is trying on underwear which are too large.

[H] A boy is trying on underwear which is too small.

[LABEL] contradiction [PRED] contradiction [COEFF] 7.3284

[P] A man is preparing to get on his bicycle.

[H] The man is getting into a car.

[LABEL] contradiction [PRED] contradiction [COEFF] 7.1698

[P] A female athlete is racing ahead in a jogging suit and tennis shoes.

[H] The female athlete is sitting.

[LABEL] contradiction [PRED] contradiction [COEFF] 7.1422

[P] A man in a black suit with a white bowtie standing in the middle of a crowded room.

[H] A man is standing in an empty room.

[LABEL] contradiction [PRED] contradiction [COEFF] 6.9791

[P] A man known as deleon speaks at a q a.

[H] The man is named larry.

## 1.96 Component 95

[LABEL] entailment [PRED] entailment [COEFF] 12.7269

[P] There are three dogs running in the grass with trees behind them.

[H] The dogs are running.

[LABEL] entailment [PRED] entailment [COEFF] 11.6540

[P] A man dressed all in black talks with a lady wearing a light blue dress and a white headscarf.

[H] The man is talking.

[LABEL] entailment [PRED] entailment [COEFF] 11.2899

[P] A group of people running a race outside wearing short - sleeve shirts and shorts.

[H] The people are running.

[LABEL] entailment [PRED] entailment [COEFF] 11.0579

[P] A woman in a pink shirt and knee pads is playing volleyball.

[H] The woman is playing volleyball.

[LABEL] entailment [PRED] entailment [COEFF] 10.9200

[P] One caucasian woman walks among an ethnically diverse group of pedestrians, crossing the street during the day in an urban environment.

[H] The woman is walking.

[LABEL] entailment [PRED] entailment [COEFF] 10.6287

[P] Two teenage girls play a game with their hands together.

[H] The girls are playing a game.

[LABEL] entailment [PRED] entailment [COEFF] 10.5674

[P] A little girl in a blue outfit is climbing on metal railings in the street.

[H] The little girl is climbing.

[LABEL] entailment [PRED] entailment [COEFF] 10.5647

[P] An elderly gentleman dressed in a formal white shirt and pinstriped black slacks and black shoes is dancing with a middle - aged woman in a short white dress and black high heeled shoes on a wood floor in a dimly lit room, while another similar dressed couple dances.

[H] The elderly gentleman is dancing.

[LABEL] entailment [PRED] entailment [COEFF] 10.3444

[P] Five men are working on a building, only two are looking at the camera.

[H] The men are working.

[LABEL] entailment [PRED] entailment [COEFF] 10.2756

[P] A group of people watch a drag race at the beginning and see the fire from the cars.

[H] The people are watching the race.

[LABEL] entailment [PRED] entailment [COEFF] 10.1238

[P] A woman with glasses combs through her hair with her fingers as she writes in a notebook with a pen.

[H] The woman is writing.

[LABEL] entailment [PRED] entailment [COEFF] 9.8007  
[P] A man with a orange hat and a brown jacket has a cigarette in his mouth.  
[H] The man is smoking.

[LABEL] entailment [PRED] entailment [COEFF] 9.6316  
[P] A group of people sitting against a wall eat snacks.  
[H] The people are eating.

[LABEL] entailment [PRED] entailment [COEFF] 9.5862  
[P] A young man in a blue shirt eats a hotdog.  
[H] The man is eating.

[LABEL] entailment [PRED] entailment [COEFF] 9.4896  
[P] Asian ladies serving food to what it looks to be an asian restaurant.  
[H] The women are serving food.

[LABEL] entailment [PRED] entailment [COEFF] 9.3077  
[P] Children drinking from juice cartons.  
[H] The children are drinking.

## 1.97 Component 96

[LABEL] entailment [PRED] entailment [COEFF] 39.8540  
[P] This man is holding a shovel.  
[H] The man is holding something.

[LABEL] entailment [PRED] entailment [COEFF] 38.7391  
[P] A woman holding a newspaper.  
[H] A woman is holding something.

[LABEL] entailment [PRED] entailment [COEFF] 35.1167  
[P] A young woman wearing glasses and a black blouse holds a ladle in one hand, a bowl in the other and a fork in her mouth.  
[H] There is a woman holding something

[LABEL] entailment [PRED] entailment [COEFF] 33.8943  
[P] A man in a suit is holding a paper.  
[H] The man is holding something.

[LABEL] entailment [PRED] entailment [COEFF] 33.2130  
[P] A child with a orange backpack is carrying a green bird house.  
[H] A child is carrying something.

[LABEL] entailment [PRED] entailment [COEFF] 28.5962  
[P] A woman is holding a child.  
[H] The woman is holding something.

[LABEL] entailment [PRED] entailment [COEFF] 27.3691

[P] A man looking at chinese writing.

[H] A man is looking at something.

[LABEL] entailment [PRED] entailment [COEFF] 23.6674

[P] A girl in jean shorts and a yellow shirt is touching her sunglasses.

[H] A girl is touching something.

[LABEL] neutral [PRED] entailment [COEFF] 23.5224

[P] A man in uniform is pushing a medical bed.

[H] A man is pushing something

[LABEL] entailment [PRED] entailment [COEFF] 22.3586

[P] Three men look at a sign.

[H] Three men are looking at something

[LABEL] entailment [PRED] entailment [COEFF] 22.2401

[P] Two black women are watching a performance.

[H] Two women are watching something.

[LABEL] entailment [PRED] entailment [COEFF] 21.6535

[P] Two women are looking into a glass case.

[H] Two ladies are looking at something

[LABEL] entailment [PRED] entailment [COEFF] 20.9783

[P] A blond holding camera equipment near a track.

[H] A blonde is holding something.

[LABEL] entailment [PRED] entailment [COEFF] 20.9701

[P] A small child is learning about electricity with wires.

[H] The small child is learning something.

[LABEL] entailment [PRED] entailment [COEFF] 20.9463

[P] A girl carries a lot through the grass.

[H] The girl is carrying something.

[LABEL] entailment [PRED] entailment [COEFF] 20.7011

[P] A man holding a business sign in a crowded street.

[H] The man is holding something.

## 1.98 Component 97

[LABEL] contradiction [PRED] contradiction [COEFF] 35.1182

[P] Men in uniforms are playing soccer in a crowded arena.

[H] Girl eats carrots

[LABEL] contradiction [PRED] contradiction [COEFF] 34.1408

[P] A black man in a suit is crying at a microphone podium that says " national baseball hall of fame.  
"

[H] Girl eats cotton candy

[LABEL] contradiction [PRED] contradiction [COEFF] 30.3419

[P] A man wearing a kilt, black shirt and black boots standing next to a man in a white shirt and jeans.

[H] Girl eats oranges

[LABEL] contradiction [PRED] contradiction [COEFF] 26.9232

[P] A woman is sitting on a bench looking at her phone.

[H] Boy eats chips

[LABEL] contradiction [PRED] contradiction [COEFF] 23.9358

[P] A woman holds a purple umbrella in the rain.

[H] Man eats cheerios

[LABEL] contradiction [PRED] contradiction [COEFF] 23.0049

[P] One man is chasing another man with a football in a game of flag football.

[H] Girl eats ice cream cone

[LABEL] contradiction [PRED] contradiction [COEFF] 22.6874

[P] A kid fetches a frisbee by a tree in the yard.

[H] Dog eats steak

[LABEL] contradiction [PRED] contradiction [COEFF] 21.8808

[P] An elderly man practicing martial arts.

[H] The woman eats salsa

[LABEL] contradiction [PRED] contradiction [COEFF] 21.2859

[P] Two women on a movie set reviewing film

[H] Man eats hardees

[LABEL] contradiction [PRED] contradiction [COEFF] 20.7655

[P] A young man lays down wearing tight jeans and a studded belt

[H] The girl eats pork.

[LABEL] contradiction [PRED] contradiction [COEFF] 20.5424

[P] An older woman cleaning the street outside of a clothing store with mannequins visible behind the display.

[H] Boy eats many bananas

[LABEL] contradiction [PRED] contradiction [COEFF] 20.4225

[P] A woman is walking past a sign.

[H] Man eats cake.

[LABEL] contradiction [PRED] contradiction [COEFF] 18.4589

[P] A man, with a red sports jersey, looks on at a football match.

[H] Dog eats food

[LABEL] contradiction [PRED] contradiction [COEFF] 18.3781

[P] A welder in protective clothing and mask works to weld together pieces of metal on a structure that is coming up out of a body of water.

[H] Girl eats burgers

[LABEL] contradiction [PRED] contradiction [COEFF] 17.9473

[P] Two young men, one smoking, walk past a large sign that uses orange stars to spell " hell ".

[H] Girl eats popsicle

[LABEL] contradiction [PRED] contradiction [COEFF] 17.9229

[P] Two dogs playing on a sandy beach

[H] Girl eats coffee cake

## 1.99 Component 98

[LABEL] contradiction [PRED] contradiction [COEFF] 26.2631

[P] A girl in a pink bikini is jumping off a diving board into a swimming pool.

[H] A girl is in a blue bikini.

[LABEL] contradiction [PRED] contradiction [COEFF] 26.1450

[P] A man walking a dog puts his arm around the shoulder of a woman with pink pants.

[H] The woman is wearing blue pants

[LABEL] contradiction [PRED] contradiction [COEFF] 26.1156

[P] A woman skating with a pink helmet on.

[H] The helmet is blue

[LABEL] contradiction [PRED] contradiction [COEFF] 25.8907

[P] A brown dog with green collar holding a stick in its mouth.

[H] The dog is wearing a blue collar.

[LABEL] contradiction [PRED] contradiction [COEFF] 25.4777

[P] A car is driving towards a green mountain.

[H] The mountain is blue

[LABEL] contradiction [PRED] contradiction [COEFF] 24.5316

[P] A little boy is in a bathroom holding a green ball.

[H] A boy is throwing a blue ball in the yard.

[LABEL] contradiction [PRED] contradiction [COEFF] 24.2478

[P] A person wearing a pink shirt taking a picture of something up above.

[H] A person wearing blue playing with a dog.

[LABEL] **contradiction** [PRED] **contradiction** [COEFF] 23.3929

[P] A young women's soccer team with green uniforms is performing a stretching exercise.

[H] A young women's soccer team with blue uniforms is performing a stretching exercise.

[LABEL] **contradiction** [PRED] **contradiction** [COEFF] 23.0604

[P] Small girl wearing a white sweater standing between branches of a tree with green leaves.

[H] The girl is wearing a blue sweater.

[LABEL] **contradiction** [PRED] **contradiction** [COEFF] 22.5067

[P] A small girl chases a pink ball over the gravel driveway.

[H] The girl chases a blue cube

[LABEL] **contradiction** [PRED] **contradiction** [COEFF] 21.6690

[P] A man in a long brown coat is standing in front of a person wearing a lime green jacket.

[H] A man in a blue coat standing alone

[LABEL] **contradiction** [PRED] **contradiction** [COEFF] 19.6947

[P] A group of workers wearing bright orange jackets with reflective stripes, a man in the middle is holding a sign.

[H] The jackets are blue.

[LABEL] **contradiction** [PRED] **contradiction** [COEFF] 19.5643

[P] Three people wearing green shirts ride together on the swings.

[H] Three people are wearing all blue on the swings

[LABEL] **contradiction** [PRED] **contradiction** [COEFF] 19.5244

[P] A college male volleyball player wearing orange hits the ball over the net.

[H] A college male volleyball player wearing blue hits the ball.

[LABEL] **contradiction** [PRED] **contradiction** [COEFF] 18.8392

[P] Young girl in pink dress plays with boy and a ball

[H] The young girl is wearing a purple dress.

[LABEL] **contradiction** [PRED] **contradiction** [COEFF] 17.9663

[P] A woman wearing orange sunglasses plays the drums.

[H] A woman in blue sunglasses plays the ukulele.

## 1.100 Component 99

[LABEL] **entailment** [PRED] **entailment** [COEFF] 9.3679

[P] A guy surfing in the ocean

[H] A guy surfing.

[LABEL] **entailment** [PRED] **entailment** [COEFF] 9.2676

[P] Man surfing on a brightly colored surfboard.

[H] A man surfing.



|         |                                                       |        |            |         |        |
|---------|-------------------------------------------------------|--------|------------|---------|--------|
| [LABEL] | entailment                                            | [PRED] | entailment | [COEFF] | 9.2479 |
| [P]     | Young girl playing with streamers.                    |        |            |         |        |
| [H]     | A girl playing.                                       |        |            |         |        |
|         |                                                       |        |            |         |        |
| [LABEL] | entailment                                            | [PRED] | entailment | [COEFF] | 8.5276 |
| [P]     | Two people walking down a stone walkway               |        |            |         |        |
| [H]     | Two people walking.                                   |        |            |         |        |
|         |                                                       |        |            |         |        |
| [LABEL] | entailment                                            | [PRED] | entailment | [COEFF] | 7.9558 |
| [P]     | A baseball player just taking a swing at a stadium.   |        |            |         |        |
| [H]     | A player playing baseball.                            |        |            |         |        |
|         |                                                       |        |            |         |        |
| [LABEL] | entailment                                            | [PRED] | entailment | [COEFF] | 7.9480 |
| [P]     | A white dog running in the snow.                      |        |            |         |        |
| [H]     | A dog is running.                                     |        |            |         |        |
|         |                                                       |        |            |         |        |
| [LABEL] | entailment                                            | [PRED] | entailment | [COEFF] | 7.3491 |
| [P]     | A black dog runs with its tongue out.                 |        |            |         |        |
| [H]     | A dog running.                                        |        |            |         |        |
|         |                                                       |        |            |         |        |
| [LABEL] | entailment                                            | [PRED] | entailment | [COEFF] | 7.0517 |
| [P]     | A blond woman is singing on stage.                    |        |            |         |        |
| [H]     | A woman singing.                                      |        |            |         |        |
|         |                                                       |        |            |         |        |
| [LABEL] | entailment                                            | [PRED] | entailment | [COEFF] | 6.9955 |
| [P]     | A group of guys swimming in red trunks.               |        |            |         |        |
| [H]     | A group of guys swimming.                             |        |            |         |        |
|         |                                                       |        |            |         |        |
| [LABEL] | entailment                                            | [PRED] | entailment | [COEFF] | 6.9258 |
| [P]     | A man in a orange shirt laughing at a mascot.         |        |            |         |        |
| [H]     | A person laughing.                                    |        |            |         |        |
|         |                                                       |        |            |         |        |
| [LABEL] | entailment                                            | [PRED] | entailment | [COEFF] | 6.8607 |
| [P]     | A young girl running on the beach.                    |        |            |         |        |
| [H]     | A girl is running.                                    |        |            |         |        |
|         |                                                       |        |            |         |        |
| [LABEL] | entailment                                            | [PRED] | entailment | [COEFF] | 6.7968 |
| [P]     | Three people practicing tennis techniques.            |        |            |         |        |
| [H]     | People practicing tennis techniques.                  |        |            |         |        |
|         |                                                       |        |            |         |        |
| [LABEL] | entailment                                            | [PRED] | entailment | [COEFF] | 6.7141 |
| [P]     | Man in white shirt walking.                           |        |            |         |        |
| [H]     | Someone is walking.                                   |        |            |         |        |
|         |                                                       |        |            |         |        |
| [LABEL] | entailment                                            | [PRED] | entailment | [COEFF] | 6.7013 |
| [P]     | Girl with rosy cheeks and lips holding black toy gun. |        |            |         |        |

[H] Girl holding a toy.

[LABEL] entailment [PRED] entailment [COEFF] 6.5694

[P] People walking in a street.

[H] People walk.

[LABEL] entailment [PRED] entailment [COEFF] 6.4185

[P] A little girl with long blond - hair in a ponytail wearing a black and white polka dotted dress with pink trim and rabbit ears sits in a red chair playing the speed up video game.

[H] A girl playing a video game.

### 1.101 Component 100

[LABEL] entailment [PRED] entailment [COEFF] 9.0481

[P] A man is standing in the doorway of a building containing a garage door painted with " no parking."  
"

[H] A man is standing in a doorway of a building.

[LABEL] entailment [PRED] entailment [COEFF] 8.7959

[P] Two men in orange vests and hard hats are standing at the base of an unfinished building and are working on lifting something.

[H] Two man are standing by a building.

[LABEL] entailment [PRED] entailment [COEFF] 8.2938

[P] Two girls with backpacks on standing at a counter with a woman sitting at a desk.

[H] Two girls stand at a counter.

[LABEL] entailment [PRED] entailment [COEFF] 8.0340

[P] Two men are standing in front of a snowcapped mountain.

[H] Two men in front of a mountain.

[LABEL] entailment [PRED] entailment [COEFF] 7.9012

[P] A boy wearing a blue tie dye t - shirt standing on a white brick wall.

[H] A boy stands on a wall.

[LABEL] entailment [PRED] entailment [COEFF] 7.5898

[P] A man is standing in front of a bar.

[H] A man stands in front of the bar.

[LABEL] entailment [PRED] entailment [COEFF] 7.5031

[P] A man in jeans is standing in the shadow of a light pole near a building and holding his hand to his head while he looks at window display for a bank.

[H] A man stands near a building with his hand on his head.

[LABEL] entailment [PRED] entailment [COEFF] 7.4598

[P] A young boy is standing on a street with a pouch around his neck.

[H] A boy standing on the street.

[LABEL] entailment [PRED] entailment [COEFF] 7.3672

[P] A man standing near a grille with charcoal in it.

[H] A man stands next to a grill.

[LABEL] entailment [PRED] entailment [COEFF] 7.0817

[P] A group of people are standing outside staring at various people lying on the ground.

[H] A group of people are outside.

[LABEL] entailment [PRED] entailment [COEFF] 6.9640

[P] A woman in a purple hooded sweatshirt leans on a wall.

[H] A woman is leaning against a wall

[LABEL] entailment [PRED] entailment [COEFF] 6.9564

[P] A man is standing next to a rack with hats hanging on it.

[H] A man is standing next to a rack.

[LABEL] entailment [PRED] entailment [COEFF] 6.7525

[P] A group of men and women are gathered under a tree outside of a building.

[H] A group of people are outside.

[LABEL] entailment [PRED] entailment [COEFF] 6.6208

[P] Two men in harley davidson t - shirt standing in front of cigar display.

[H] Two men stand in front of a display.

[LABEL] entailment [PRED] entailment [COEFF] 6.5713

[P] A man with stretched earlobes wearing a black hat stands in front of a display of food for sale.

[H] A man is standing in front of a food display.

[LABEL] entailment [PRED] entailment [COEFF] 6.4877

[P] Two people are standing outside of a wine shop.

[H] Two people standing outside.

## 1.102 Component 101

[LABEL] contradiction [PRED] contradiction [COEFF] 27.7509

[P] A dog is running in a large body of water causing it to splash.

[H] The dog is watching tv.

[LABEL] contradiction [PRED] contradiction [COEFF] 24.4189

[P] A little girl is sliding down a tunnel smiling.

[H] The girl is watching tv.

[LABEL] contradiction [PRED] contradiction [COEFF] 23.4258

[P] Boy with yellow toy in hand, jumps on a toy on green grass.

[H] The boy is watching television.

[LABEL] contradiction [PRED] contradiction [COEFF] 22.5110

[P] A boy is sitting on a rock, looking at the valley below.

[H] The boy is watching tv.

[LABEL] contradiction [PRED] contradiction [COEFF] 22.0699

[P] Two kids peek their head from a pile of leaves on a beautiful fall day.

[H] The two kids were watching tv

[LABEL] contradiction [PRED] contradiction [COEFF] 20.7785

[P] A small boy wearing a green and blue shirt is sitting in a construction vehicle

[H] A kid is watching tv.

[LABEL] contradiction [PRED] contradiction [COEFF] 20.4694

[P] A man with a rucksack, wearing shorts and sunglasses, waits to cross the road, while a young male with a bicycle looks at oncoming traffic.

[H] The people were watching tv

[LABEL] contradiction [PRED] contradiction [COEFF] 19.9356

[P] A young girl wearing a heavy blue coat pauses to look at the ripples her foot has made in a puddle on a paved road.

[H] The young girl was watching tv

[LABEL] contradiction [PRED] contradiction [COEFF] 19.6802

[P] Two women in white dresses are posing on a blanket for photographs in the middle of a park.

[H] The two women were watching tv

[LABEL] contradiction [PRED] contradiction [COEFF] 19.1396

[P] A skier with ski sticks is cutting into the snow as he makes a sharp turn.

[H] A person is watching tv.

[LABEL] contradiction [PRED] contradiction [COEFF] 19.1114

[P] A man working in a foundry.

[H] He is watching tv.

[LABEL] contradiction [PRED] contradiction [COEFF] 17.9879

[P] Two men are working on gray bike that is up on some type of hoist.

[H] The men are watching television.

[LABEL] contradiction [PRED] contradiction [COEFF] 17.4749

[P] A young woman in jeans and white tee is standing on her toes.

[H] A woman is watching tv.

[LABEL] contradiction [PRED] contradiction [COEFF] 16.8522

[P] Children sit on a wall inside a cemetery.

[H] Children are watching tv at their home

[LABEL] contradiction [PRED] contradiction [COEFF] 16.6847

[P] A jockey in yellow and a jockey in blue are racing their horses down a grassy raceway.

[H] The jockies are at home watching tv.

[LABEL] contradiction [PRED] contradiction [COEFF] 16.4697

[P] A family is walking on the sidewalk through the snow while a man sits on the side with his paper cup.

[H] The family is watching tv.

### 1.103 Component 102

[LABEL] neutral [PRED] contradiction [COEFF] 57.9306

[P] A young woman is walking with shopping bags in hollywood.

[H] A tall woman walking

[LABEL] neutral [PRED] contradiction [COEFF] 43.8636

[P] An elderly man wearing a dark suit, a hat, and clogs winds twine around a wooden implement.

[H] A tall person in a suit

[LABEL] neutral [PRED] contradiction [COEFF] 41.5804

[P] A young man is climbing up a rock face with one rope dangling down.

[H] A tall person climbing

[LABEL] neutral [PRED] contradiction [COEFF] 38.4190

[P] A young child holding hands with a woman and the walk past a wall with the number 93 painted on it.

[H] A tall person holding hands

[LABEL] neutral [PRED] contradiction [COEFF] 35.0870

[P] A young man in a hard hat and safety vest sitting in a pickup while another man holds on in the passenger seat.

[H] A tall person with a hat

[LABEL] neutral [PRED] contradiction [COEFF] 32.1945

[P] An elderly man communicates with a man and a woman.

[H] A tall person communicating

[LABEL] neutral [PRED] contradiction [COEFF] 30.8489

[P] A priest ministers to a group of young wide - eyed kids.

[H] A tall human ministers.

[LABEL] neutral [PRED] contradiction [COEFF] 25.3776

[P] A young man with red - hair and a green shirt doing his homework at a table in the library.

[H] A tall human at a table.

[LABEL] neutral [PRED] contradiction [COEFF] 23.1541

[P] A young man jumps from one balcony to another.

[H] A tall human jumping

[LABEL] **neutral** [PRED] **contradiction** [COEFF] 20.9838

[P] A brown dog swimming in murky water.

[H] A large dog swimming in a swamp.

[LABEL] **contradiction** [PRED] **contradiction** [COEFF] 19.7341

[P] A young female swimmer is getting ready to jump off the block.

[H] The swimmer is a large boy.

[LABEL] **neutral** [PRED] **contradiction** [COEFF] 18.0512

[P] A brown and white dog is running across the grass.

[H] A big dog is running across the grass.

[LABEL] **neutral** [PRED] **contradiction** [COEFF] 17.4715

[P] A silly person dressing with a paper mache head is dancing around and looking like they are having fun!

[H] A tall person having fun

[LABEL] **neutral** [PRED] **contradiction** [COEFF] 16.4270

[P] A woman and a small child stand intimately at a calm lake shore

[H] Tall humans standing

[LABEL] **contradiction** [PRED] **contradiction** [COEFF] 16.3262

[P] A young boy in a toddler swing.

[H] A large boy sliding down the slide.

[LABEL] **neutral** [PRED] **contradiction** [COEFF] 16.0459

[P] A black man with a black hat and red glasses studies his hands while sitting next to a white man with his hands folded.

[H] A tall person with a hat

## 1.104 Component 103

[LABEL] **neutral** [PRED] **neutral** [COEFF] 14.6860

[P] Two men sitting on a flight of stairs next to the number five.

[H] The men are chatting about their day.

[LABEL] **neutral** [PRED] **neutral** [COEFF] 12.0256

[P] A man is talking and holding a piece of paper.

[H] A man holding a piece of paper with a note on it

[LABEL] **neutral** [PRED] **neutral** [COEFF] 10.6821

[P] Two young women walking.

[H] Two young women walking through a park.

[LABEL] **neutral** [PRED] **neutral** [COEFF] 10.4866

[P] A blond woman and a brown - haired man kissing.

[H] A couple is kissing at their wedding

[LABEL] **neutral** [PRED] **neutral** [COEFF] 10.2274

[P] A young child being hugged by a woman with light brown hair.

[H] A woman was embracing a child in the front yard.

[LABEL] **neutral** [PRED] **neutral** [COEFF] 10.2169

[P] Woman performing with hula hoops wearing a red dress in front of an audience.

[H] The performer is putting on a show at the county fair.

[LABEL] **neutral** [PRED] **neutral** [COEFF] 10.1937

[P] Men as they take off and try to run as fast as they can.

[H] They are running from the cops.

[LABEL] **neutral** [PRED] **neutral** [COEFF] 9.8282

[P] Two people, one in black and one in blue, are riding motorcycles.

[H] Two people are on motorcycles riding on the highway as the sun sets behind them.

[LABEL] **neutral** [PRED] **neutral** [COEFF] 9.7917

[P] Brad paisley is playing his guitar and singing.

[H] Brad is sitting on the front porch with his guitar.

[LABEL] **neutral** [PRED] **neutral** [COEFF] 9.7690

[P] Three women in brightly colored dresses.

[H] Three women waited for their dates.

[LABEL] **neutral** [PRED] **neutral** [COEFF] 9.5619

[P] A man wearing a red helmet rides a bike.

[H] A man is riding his bike to the store.

[LABEL] **neutral** [PRED] **neutral** [COEFF] 9.5330

[P] A woman in a pink shirt is placing her hand over her heart as she rides a horse.

[H] A woman is riding a horse as the national anthem plays.

[LABEL] **neutral** [PRED] **neutral** [COEFF] 9.4970

[P] A woman is climbing a rocky hill overshadowed by a partly cloudy sky.

[H] A woman is hiking up a hill in the search for a new path

[LABEL] **neutral** [PRED] **neutral** [COEFF] 9.2569

[P] Two girls riding an atv.

[H] The two girls were riding their atv down the dessert.

[LABEL] **neutral** [PRED] **neutral** [COEFF] 9.2204

[P] Two people painting a brick wall.

[H] Two people paint over the graffiti on the brick wall next door to their shop

[LABEL] **neutral** [PRED] **neutral** [COEFF] 9.0931

[P] Two men are conversing with one another.  
[H] Two older men are talking to each other.

### 1.105 Component 104

[LABEL] **contradiction** [PRED] **contradiction** [COEFF] 31.6285

[P] A young lady with wild blond - hair is playing the electric guitar on the stage.

[H] A lady is playing drums on stage.

[LABEL] **contradiction** [PRED] **contradiction** [COEFF] 29.1308

[P] A man playing the guitar for a small group of people.

[H] The man is playing drums for a group of people.

[LABEL] **contradiction** [PRED] **contradiction** [COEFF] 28.5219

[P] Two guys playing the guitar

[H] Both men shown are playing drums.

[LABEL] **contradiction** [PRED] **contradiction** [COEFF] 23.6394

[P] There is a man in a black and yellow outfit playing the drums.

[H] A man is playing the guitar.

[LABEL] **contradiction** [PRED] **contradiction** [COEFF] 21.7909

[P] A man standing in front of a microphone playing a guitar.

[H] A man sitting in front of a microphone playing a drums

[LABEL] **contradiction** [PRED] **contradiction** [COEFF] 19.7506

[P] A man standing on a stage playing a guitar and a harmonica waving to the crowd.

[H] A man sitting onstage is playing the drums.

[LABEL] **contradiction** [PRED] **contradiction** [COEFF] 18.3741

[P] Guy plays guitar at a concert.

[H] The man is practicing playing the drums.

[LABEL] **contradiction** [PRED] **contradiction** [COEFF] 18.2205

[P] A man dressed mainly in black is holding a huge triangular guitar - like instrument with a musical stand in front of him.

[H] A man plays the drums.

[LABEL] **contradiction** [PRED] **contradiction** [COEFF] 18.2196

[P] A guitarist plays on stage with green lights behind him.

[H] The man is playing the drums.

[LABEL] **contradiction** [PRED] **contradiction** [COEFF] 16.6310

[P] A trio is singing and playing keyboard and guitar.

[H] People are playing drums and congas.



[LABEL] **contradiction** [PRED] **contradiction** [COEFF] 15.3112  
 [P] A woman in a red shirt looks very happy next to a man playing a guitar in a very futuristic setting while a camera records them both.  
 [H] Woman plays drums for guy sitting on chair

[LABEL] **contradiction** [PRED] **contradiction** [COEFF] 14.0543  
 [P] Two white guys with game guitars playing a video game.  
 [H] The men are playing drums.

[LABEL] **contradiction** [PRED] **contradiction** [COEFF] 12.4497  
 [P] A man wearing black is playing a silver guitar.  
 [H] A man plays the drum on stage.

[LABEL] **contradiction** [PRED] **contradiction** [COEFF] 12.4108  
 [P] A musician is singing while playing guitar.  
 [H] The musician is playing a harmonica.

[LABEL] **contradiction** [PRED] **contradiction** [COEFF] 11.8796  
 [P] A man in a black shirt and salt and pepper hair is speaking into a microphone.  
 [H] A man is playing guitar.

[LABEL] **contradiction** [PRED] **contradiction** [COEFF] 11.3293  
 [P] A man plays his accordion along the streets, entertaining passersby.  
 [H] A man is playing a guitar on a bench.

## 1.106 Component 105

[LABEL] **neutral** [PRED] **neutral** [COEFF] 30.9442  
 [P] A boy in a blue jacket standing on a street corner.  
 [H] The boy is ten years old

[LABEL] **neutral** [PRED] **neutral** [COEFF] 30.8209  
 [P] A boy hangs onto straps on a train.  
 [H] The boy is ten years old

[LABEL] **neutral** [PRED] **neutral** [COEFF] 25.1227  
 [P] Many children playing outside in the grass practicing punching.  
 [H] There are six children outside practicing.

[LABEL] **neutral** [PRED] **neutral** [COEFF] 24.0259  
 [P] A bike racer following the racing trail uphill.  
 [H] The boy on the bike is 12 years old.

[LABEL] **entailment** [PRED] **neutral** [COEFF] 23.8222  
 [P] There are two men here at the center of the picture wearing red tie dye shirts and metal helmets topped with lit burners.  
 [H] The men are at least 10 years old.

[LABEL] neutral [PRED] neutral [COEFF] 23.1964

[P] A soldier, wearing fatigues playing the snare drum in the army's marching band with other members of the band in the background.

[H] There are 32 total band members.

[LABEL] neutral [PRED] neutral [COEFF] 22.1196

[P] A family poses for a photo at dinner.

[H] A family of five posing at the dinner table.

[LABEL] neutral [PRED] neutral [COEFF] 21.4805

[P] A small redheaded girl blows bubbles on a playground.

[H] A redheaded girl blows 10 bubbles.

[LABEL] neutral [PRED] neutral [COEFF] 21.3840

[P] A person sits on the ground in front of a child wearing blue.

[H] The child is 5 years old

[LABEL] neutral [PRED] neutral [COEFF] 21.2107

[P] A few men in gold and red oriental robes.

[H] Men in oriental robes that cost \$ 1000 each.

[LABEL] neutral [PRED] neutral [COEFF] 19.7568

[P] A man in gray holds his dog's leash while his son sits on his shoulders.

[H] The son is just three years old.

[LABEL] neutral [PRED] neutral [COEFF] 19.5367

[P] A view from above of someone tending to trays of fish for sale.

[H] The fish cost 1. 99 a pound.

[LABEL] neutral [PRED] neutral [COEFF] 18.2523

[P] An older man in a gray shirt carving a sculpture.

[H] The man has been carving for an hour.

[LABEL] neutral [PRED] neutral [COEFF] 17.8460

[P] A crowd watching air balloons at night.

[H] There are 20 balloons in the air and 50 on the ground.

[LABEL] neutral [PRED] neutral [COEFF] 16.9397

[P] A woman in a red top holding a crying baby.

[H] The baby is her sister's

[LABEL] neutral [PRED] neutral [COEFF] 16.8395

[P] A tall asian lady wearing a red bikini is walking on the volleyball court sand in beijing 2008 olympics.

[H] The woman has won a silver medal before.

## 1.107 Component 106

[LABEL] **neutral** [PRED] **neutral** [COEFF] 20.1086

[P] A young girl sits on the sidewalk in front of a row of bikes.

[H] A young girl tries to pick which bike she wants to buy

[LABEL] **neutral** [PRED] **neutral** [COEFF] 20.0971

[P] Two blond women are hugging one another.

[H] Some women are hugging on vacation.

[LABEL] **neutral** [PRED] **neutral** [COEFF] 18.4887

[P] Clown with red - hair pretending to cry.

[H] Clown with red - hair pretending to cry, trying to be funny.

[LABEL] **neutral** [PRED] **neutral** [COEFF] 18.1981

[P] Some people are eating at an outside restaurant at night.

[H] Some people eating their favorite food.

[LABEL] **neutral** [PRED] **neutral** [COEFF] 17.6694

[P] Lady reading a story from a book.

[H] A woman is reading a book to some children.

[LABEL] **neutral** [PRED] **neutral** [COEFF] 17.4048

[P] A man, two women, and a child watch fireworks while the child sits on the shoulders of one woman.

[H] A family is picnicking and watching fireworks on the fourth of july.

[LABEL] **neutral** [PRED] **neutral** [COEFF] 17.1692

[P] A young boy is swimming with goggles.

[H] A boy swimming while on summer vacation.

[LABEL] **neutral** [PRED] **neutral** [COEFF] 16.4949

[P] A man and women looking at magazines in a window.

[H] The man and women are thinking about buying the magazines.

[LABEL] **neutral** [PRED] **neutral** [COEFF] 16.4753

[P] A clown next to a boy throwing something and a girl in a blue outfit

[H] A clown throws something at people to be funny.

[LABEL] **neutral** [PRED] **neutral** [COEFF] 16.2296

[P] Man in a white gi and yellow belt with three stripes doing a karate pose.

[H] A karate champion poses for the cameras after a fight.

[LABEL] **neutral** [PRED] **neutral** [COEFF] 16.0590

[P] Two white girls running in a marathon that wears blue tops and black bottoms on a path with other people.

[H] The people are trying to win the marathon.

[LABEL] **neutral** [PRED] **neutral** [COEFF] 16.0125

[P] The large brown dog faces the little white dog on the grass.

[H] The dogs want to play fetch.

[LABEL] **neutral** [PRED] **neutral** [COEFF] 15.5072

[P] A single ballet dancer wearing yellow is dancing on a stage with red curtains.

[H] A dancer is auditioning for a dance show

[LABEL] **neutral** [PRED] **neutral** [COEFF] 15.5057

[P] People riding mopeds down the street.

[H] People are enjoying themselves while riding mopeds.

[LABEL] **neutral** [PRED] **neutral** [COEFF] 15.0994

[P] A young boy smiles while holding a tube of toothpaste.

[H] A kid likes to play with toothpaste in the bathroom.

[LABEL] **neutral** [PRED] **neutral** [COEFF] 15.0675

[P] The furry black dog is sitting on the grass

[H] A dog is waiting for a ball to be thrown.

## 1.108 Component 107

[LABEL] **contradiction** [PRED] **contradiction** [COEFF] 7.7883

[P] A man and toddler are walking along the beach in front of the ocean.

[H] They are in a building

[LABEL] **contradiction** [PRED] **contradiction** [COEFF] 7.1342

[P] A dog swimming.

[H] The dog is standing in a field.

[LABEL] **contradiction** [PRED] **contradiction** [COEFF] 7.0111

[P] Tourist speculating their surrounding at a pier.

[H] Tourists are standing on a paved street.

[LABEL] **contradiction** [PRED] **contradiction** [COEFF] 6.6496

[P] People walk by a display of underwear hanging in a stall.

[H] The underwear is in a drawer.

[LABEL] **contradiction** [PRED] **contradiction** [COEFF] 6.3630

[P] Three hikers, all wearing sunglasses, standing in the woods.

[H] The people are on a lake

[LABEL] **contradiction** [PRED] **contradiction** [COEFF] 6.2443

[P] People watching a low airplane flying overhead

[H] The people are standing in a volcano.

[LABEL] **contradiction** [PRED] **contradiction** [COEFF] 5.9460

[P] A crowd of people looking at something going on in a large city.

[H] People are on a rural farm.

[LABEL] contradiction [PRED] contradiction [COEFF] 5.7347

[P] A blue - eyed woman with red - hair and glasses looks up at the camera while holding a hamburger with a bite out of it, as she sits on a boat with four other young people who are drinking and eating.

[H] The woman is standing on a mountain top.

[LABEL] contradiction [PRED] contradiction [COEFF] 5.5115

[P] A person stands near golden walls.

[H] The person is in the forest

[LABEL] contradiction [PRED] contradiction [COEFF] 5.3293

[P] A car drifting in the desert.

[H] The car is in the middle of the lake.

[LABEL] contradiction [PRED] contradiction [COEFF] 5.0834

[P] A beautiful picture of the late audrey hepburn sits in the foreground, while a man and a woman talking on a bench sit in the background.

[H] Audrey hepburn is standing by a mountain.

[LABEL] contradiction [PRED] contradiction [COEFF] 5.0634

[P] A woman reads on newspaper on a snow covered street.

[H] She stands in the middle of a volcano

[LABEL] contradiction [PRED] contradiction [COEFF] 4.9637

[P] A marching band, wearing red and black uniforms with tall fur hats, are walking down the street as they play their instruments.

[H] The band is sitting inside a restaurant

[LABEL] contradiction [PRED] contradiction [COEFF] 4.9165

[P] A medical team surrounds a man on a gurney.

[H] The medical team is sitting in the lobby watching tv.

[LABEL] contradiction [PRED] contradiction [COEFF] 4.8522

[P] A group of tourists aboard a small and colorful boat in the waters of a southeast asian country.

[H] The tourists are on a bus in the city

[LABEL] contradiction [PRED] contradiction [COEFF] 4.7222

[P] A little girl wearing a black swimming suit holding a shovel at a beach.

[H] The girl is in a forest

## 1.109 Component 108

[LABEL] contradiction [PRED] contradiction [COEFF] 21.1088

[P] Two men vie for a football.

[H] The men are sleeping.

[LABEL] contradiction [PRED] contradiction [COEFF] 20.6747

[P] Two nuns looking at a cellphone.

[H] The nuns are sleeping.

[LABEL] contradiction [PRED] contradiction [COEFF] 17.5628

[P] Two scuba divers are in the water holding onto a large piece of equipment.

[H] The divers are sleeping.

[LABEL] contradiction [PRED] contradiction [COEFF] 16.7422

[P] Two teenage girls arm wrestle while a third girl watches.

[H] The girls are sleeping.

[LABEL] contradiction [PRED] contradiction [COEFF] 16.0938

[P] The brown dog running in the snow is carrying a large stick, also covered with snow.

[H] The dog is sleeping.

[LABEL] contradiction [PRED] contradiction [COEFF] 15.9239

[P] Two motorcyclists round a curve along a racing track, in close proximity to one another.

[H] Two people are sleeping

[LABEL] contradiction [PRED] contradiction [COEFF] 15.7837

[P] People riding a boat on a clear day.

[H] The people are sleeping.

[LABEL] contradiction [PRED] contradiction [COEFF] 15.0963

[P] Two guys playing soccer going towards the goal.

[H] The guys are sleeping

[LABEL] contradiction [PRED] contradiction [COEFF] 14.9510

[P] A dog jumps in midair to catch a frisbee.

[H] The dog is sleeping.

[LABEL] contradiction [PRED] contradiction [COEFF] 14.9290

[P] A dog is taking a dive into a body of water.

[H] The dog is sleeping

[LABEL] contradiction [PRED] contradiction [COEFF] 14.6606

[P] These three boys are trying to carry some wood.

[H] The boys are sleeping.

[LABEL] contradiction [PRED] contradiction [COEFF] 14.5604

[P] A dog catches black frisbee.

[H] The dog is sleeping.

[LABEL] contradiction [PRED] contradiction [COEFF] 14.1303

[P] Phone line workers doing repairs.

[H] The workers are sleeping

[LABEL] **contradiction** [PRED] **contradiction** [COEFF] 14.0069

[P] Construction workers are working with a crane in the street.

[H] The construction workers are sleeping.

[LABEL] **contradiction** [PRED] **contradiction** [COEFF] 13.8690

[P] Two dogs fight over a bag on a wooden deck.

[H] The dogs are asleep

[LABEL] **contradiction** [PRED] **contradiction** [COEFF] 13.6174

[P] People sit at tables while a man speaks with a microphone.

[H] The people are sleeping.

### 1.110 Component 109

[LABEL] **contradiction** [PRED] **contradiction** [COEFF] 43.3980

[P] A black - haired man plays a guitar.

[H] A black - haired man is playing the piano.

[LABEL] **contradiction** [PRED] **contradiction** [COEFF] 41.9986

[P] A dark - skinned man in a straw hat playing guitar and a man in sunglasses listening and smiling.

[H] The dark - skinned man was playing the piano.

[LABEL] **contradiction** [PRED] **contradiction** [COEFF] 28.9399

[P] A man is playing an acoustic guitar.

[H] A person is playing the piano.

[LABEL] **contradiction** [PRED] **contradiction** [COEFF] 28.8154

[P] A man wearing jeans and a t - shirt plays guitar for a smiling woman and child as they sit on a staircase near red and orange balloons.

[H] A man is playing the saxophone.

[LABEL] **contradiction** [PRED] **contradiction** [COEFF] 25.3357

[P] This is a young man playing a brown electric guitar and singing into a microphone.

[H] A man is playing a piano and humming.

[LABEL] **contradiction** [PRED] **contradiction** [COEFF] 23.7480

[P] Man with guitar holding a microphone in one hand and extending his other arm.

[H] A man playing a piano is on stage.

[LABEL] **contradiction** [PRED] **contradiction** [COEFF] 22.0385

[P] A man is holding a guitar as if to hit another man on the head.

[H] Two men are playing violin in an orchestra.

[LABEL] **contradiction** [PRED] **contradiction** [COEFF] 21.1739

[P] A man is standing playing the accordion.

[H] A man is playing the piano

[LABEL] **contradiction** [PRED] **contradiction** [COEFF] 20.6926

[P] A man dressed in a funky outfit is playing guitar.

[H] A man is playing a flute in the mountains.

[LABEL] **contradiction** [PRED] **contradiction** [COEFF] 20.0509

[P] A woman carrying a guitar is walking.

[H] The woman is holding onto a violin.

[LABEL] **contradiction** [PRED] **contradiction** [COEFF] 19.8774

[P] A male with a beard is playing a guitar.

[H] A man sings loudly, while playing the violin.

[LABEL] **contradiction** [PRED] **contradiction** [COEFF] 19.7798

[P] A small boy playing the piano.

[H] The boy is playing a violin.

[LABEL] **contradiction** [PRED] **contradiction** [COEFF] 19.6115

[P] A man in a white shirt and jeans is playing the guitar.

[H] A man is playing the piano pretending to be stevie wonder.

[LABEL] **contradiction** [PRED] **contradiction** [COEFF] 18.5566

[P] A man with a guitar in a band singing into a microphone.

[H] There is a man holding a violin while speaking into a microphone.

[LABEL] **contradiction** [PRED] **contradiction** [COEFF] 17.6987

[P] A man in a top hat playing the accordion.

[H] A man is playing the piano in his living room.

[LABEL] **contradiction** [PRED] **contradiction** [COEFF] 17.4229

[P] Two middle eastern men dressed in white robes are playing a large guitar and a bongo.

[H] Two men are playing violins in the park

### 1.111 Component 110

[LABEL] **entailment** [PRED] **entailment** [COEFF] 17.0465

[P] Two women are enjoying drinks in a crowded business.

[H] There are two women.

[LABEL] **entailment** [PRED] **entailment** [COEFF] 16.1832

[P] Two women walking in front of a brick building carrying backpacks and sleeping bags on their backs.

[H] There are two women

[LABEL] **entailment** [PRED] **entailment** [COEFF] 15.8626



[P] Two children are shoveling snow.

[H] There are two children.

[LABEL] entailment [PRED] entailment [COEFF] 15.4524

[P] Two women are wearing aprons and baking attire and cooking something in a kitchen.

[H] There are two women.

[LABEL] entailment [PRED] entailment [COEFF] 15.4284

[P] Two female employees take a break on stone steps near the sidewalk.

[H] There are two women

[LABEL] entailment [PRED] entailment [COEFF] 14.8339

[P] Two girls in midair with trees in the background

[H] There are two girls.

[LABEL] entailment [PRED] entailment [COEFF] 14.6563

[P] Two dogs tug on a towel.

[H] There are two dogs.

[LABEL] entailment [PRED] entailment [COEFF] 13.2977

[P] Three working men smile in front of a truck while holding construction equipment.

[H] There are three men working.

[LABEL] entailment [PRED] entailment [COEFF] 13.1443

[P] Two people are riding bikes beside train tracks.

[H] There are two people riding bikes.

[LABEL] entailment [PRED] entailment [COEFF] 13.0020

[P] Three children playing on a floor with toys.

[H] There are three children.

[LABEL] entailment [PRED] entailment [COEFF] 12.6562

[P] Two young girls on a playground.

[H] There are two girls.

[LABEL] entailment [PRED] entailment [COEFF] 12.6440

[P] Three men on horses chasing a bull in an arena.

[H] There are three men.

[LABEL] entailment [PRED] entailment [COEFF] 12.2681

[P] Four boys kneeling next to each other with a ball in front of them.

[H] There are four boys.

[LABEL] entailment [PRED] entailment [COEFF] 11.9311

[P] Two men are in the woods cutting down trees with a chainsaw.

[H] There are two men in the woods.

[LABEL] entailment [PRED] entailment [COEFF] 11.5583  
[P] Two men are sitting in a room with their art supplies and are talking.  
[H] There are two men sitting.

[LABEL] entailment [PRED] entailment [COEFF] 11.4132  
[P] Two college students in white t - shirts sitting and playing nintendo.  
[H] There are two college students playing nintendo.

## 1.112 Component 111

[LABEL] neutral [PRED] neutral [COEFF] 21.1883  
[P] A man strolls down a sidewalk, holding an orange bag.  
[H] A tall man strolls down a sidewalk, holding an orange and and yellow bag.

[LABEL] neutral [PRED] neutral [COEFF] 19.6102  
[P] A man singing karaoke at a party.  
[H] A man singing karaoke to a pop song at a party

[LABEL] neutral [PRED] neutral [COEFF] 19.3953  
[P] Boy takes a bath with diving mask and snorkel.  
[H] Boy taking a bath with red diving mask and snorkel

[LABEL] neutral [PRED] neutral [COEFF] 18.3543  
[P] A large group of people are gathered.  
[H] A group of people gather to discuss public policy

[LABEL] neutral [PRED] neutral [COEFF] 18.1003  
[P] Two girls sitting on a chair being sketched.  
[H] Two girls sitting on a green chair are being sketched.

[LABEL] neutral [PRED] neutral [COEFF] 17.5061  
[P] People leaning on a railing.  
[H] People lean on a railing next to the sidewalk.

[LABEL] neutral [PRED] neutral [COEFF] 17.2413  
[P] A laughing woman in a scarf.  
[H] A woman in a blue scarf is laughing

[LABEL] entailment [PRED] neutral [COEFF] 17.1059  
[P] Two boys and a cart.  
[H] Two boys have a red cart.

[LABEL] neutral [PRED] neutral [COEFF] 16.8089  
[P] A band performing on stage.  
[H] A band performing their new song on stage.

[LABEL] **neutral** [PRED] **neutral** [COEFF] 16.7925

[P] Two young women walking slowly.

[H] The two young women are walking slowly and enjoying the weather.

[LABEL] **neutral** [PRED] **neutral** [COEFF] 16.2122

[P] A group of people are gathered in an office, talking.

[H] A group of office workers are talking about a new project.

[LABEL] **neutral** [PRED] **neutral** [COEFF] 16.1567

[P] A group of people, some of whom are standing and using chopsticks, surround a table which is laden with plates of food.

[H] A group of people, some of whom are standing and using chopsticks, prepare to eat chinese food.

[LABEL] **neutral** [PRED] **neutral** [COEFF] 16.1247

[P] A large group of people stand outside of a church.

[H] A large group of people stand outside of a church after sunday worship

[LABEL] **neutral** [PRED] **neutral** [COEFF] 16.0688

[P] Little girl holding a karate trophy.

[H] A little girl is holding a karate trophy in front of a small crowd.

[LABEL] **neutral** [PRED] **neutral** [COEFF] 16.0085

[P] People are at a party at night.

[H] A group is partying at night for the 4th of july

[LABEL] **neutral** [PRED] **neutral** [COEFF] 15.7818

[P] Six neighborhood kids are playing in the snow.

[H] Six kids with brown hair are playing in the snow

### 1.113 Component 112

[LABEL] **neutral** [PRED] **neutral** [COEFF] 27.8508

[P] A woman purchases food from a street vendor.

[H] The woman is buying a hotdog.

[LABEL] **neutral** [PRED] **neutral** [COEFF] 27.7800

[P] The backside of two men cooking at a stove.

[H] The two men are making bacon.

[LABEL] **neutral** [PRED] **neutral** [COEFF] 27.3547

[P] The old women is looking at the fresh produce.

[H] The old women is looking for tomatoes.

[LABEL] **neutral** [PRED] **neutral** [COEFF] 26.1689

[P] A child eating food and smiling at the camera.

[H] A child is eating ice cream.

[LABEL] **neutral** [PRED] **neutral** [COEFF] 25.4420  
[P] People are walking in a building where food is being sold.  
[H] The building is selling kosher hotdogs

[LABEL] **neutral** [PRED] **contradiction** [COEFF] 23.0175  
[P] A man sells food in a market.  
[H] A man is selling burritos.

[LABEL] **neutral** [PRED] **neutral** [COEFF] 20.8747  
[P] The students are preparing food in the kitchen.  
[H] The students are fixing lunch

[LABEL] **neutral** [PRED] **contradiction** [COEFF] 20.8384  
[P] Two people working together serving food at a restaurant.  
[H] The people are serving breakfast.

[LABEL] **neutral** [PRED] **neutral** [COEFF] 20.7865  
[P] A tall man stirring a pot of food on a stove.  
[H] A tall man stirring a pot of pasta sauce on a stove.

[LABEL] **neutral** [PRED] **neutral** [COEFF] 20.7432  
[P] A man is standing at a counter making a meal, following a recipe from a cookbook in front of him.  
[H] A man is making a cake from a recipe in a cookbook that is in front of him.

[LABEL] **neutral** [PRED] **neutral** [COEFF] 20.0375  
[P] Two asian chefs grilling up a full meal.  
[H] Two asian chefs grill salmon.

[LABEL] **neutral** [PRED] **neutral** [COEFF] 19.9142  
[P] Three women are cultivating plants in a flooded riverbed.  
[H] Three women growing vegetables

[LABEL] **neutral** [PRED] **neutral** [COEFF] 19.8791  
[P] A merchant in a red shirt sells produce at a farmers market in a park.  
[H] A merchant sells bananas at a farmers market.

[LABEL] **neutral** [PRED] **neutral** [COEFF] 19.3390  
[P] Two individuals carrying numerous products to sell are walking on a beach.  
[H] People are trying to sell seashell necklaces.

[LABEL] **contradiction** [PRED] **neutral** [COEFF] 19.2091  
[P] Two boys are sitting next to a cart filled with colorful fruits.  
[H] A man eats a banana.

[LABEL] **neutral** [PRED] **neutral** [COEFF] 19.1212  
[P] A woman sits at an outside stand with several hand made crafts for sale.

[H] The woman is selling homemade toys.

### 1.114 Component 113

[LABEL] **neutral** [PRED] **entailment** [COEFF] 55.0340

[P] A man is standing on a power post looking as though he is fixing a power line in a city.

[H] A man is working.

[LABEL] **entailment** [PRED] **entailment** [COEFF] 50.9787

[P] A woman weaving on a giant loom.

[H] A woman is working.

[LABEL] **entailment** [PRED] **entailment** [COEFF] 46.7138

[P] A man in a blue shirt, works on a long canoe.

[H] The man is working.

[LABEL] **entailment** [PRED] **entailment** [COEFF] 41.8430

[P] A man finishing up some floor work with a brush.

[H] The person is working.

[LABEL] **entailment** [PRED] **entailment** [COEFF] 40.3026

[P] A chinese man doing work on a sign

[H] A man is working.

[LABEL] **entailment** [PRED] **neutral** [COEFF] 37.4555

[P] Two men move dirt around a young tree.

[H] They are working.

[LABEL] **neutral** [PRED] **neutral** [COEFF] 33.9732

[P] Scientist examining something with a microscope in a lab.

[H] The scientist is working.

[LABEL] **neutral** [PRED] **neutral** [COEFF] 33.6638

[P] On a street in korea a man is pulling a two - wheeled cart, piled high with a chair and cardboard and other things while behind him are a car and a truck and a street level billboard.

[H] The man is working.

[LABEL] **entailment** [PRED] **entailment** [COEFF] 33.5414

[P] Two surgeons performing a surgery.

[H] Doctors are working.

[LABEL] **entailment** [PRED] **entailment** [COEFF] 33.3520

[P] A bartender mixes drinks into two glasses.

[H] A bartender is working.

[LABEL] **neutral** [PRED] **entailment** [COEFF] 31.7651

[P] A construction worker leans forward to fix a mat on the ground while wearing a blue hard hat and orange vest.

[H] A worker is working

[LABEL] **entailment** [PRED] **entailment** [COEFF] 30.8378

[P] A photographer in a white shirt with a professional camera taking a picture.

[H] A photographer is working.

[LABEL] **entailment** [PRED] **entailment** [COEFF] 29.5949

[P] Two men in orange coveralls shovel snow off railroad tracks.

[H] The men are working.

[LABEL] **entailment** [PRED] **entailment** [COEFF] 27.5880

[P] There are several construction workers in an area blocked off from a sidewalk by a orange and white barricade and a metal fence with several construction machines.

[H] Construction workers are working.

[LABEL] **neutral** [PRED] **entailment** [COEFF] 26.6110

[P] A laboratory technician is using a pipette.

[H] A lab tech is working.

[LABEL] **entailment** [PRED] **entailment** [COEFF] 25.3066

[P] A lady working on a machine.

[H] A lady is working

### 1.115 Component 114

[LABEL] **entailment** [PRED] **entailment** [COEFF] 5.0758

[P] There is a group of people and a black dog in a living and dining room, some sleeping some eating.

[H] A group and a dog hang out eating and sleeping

[LABEL] **entailment** [PRED] **entailment** [COEFF] 4.6595

[P] A girl is standing in a field pushing up her hat with one finger and her hand is covering most of her face.

[H] A girl covers her face.

[LABEL] **entailment** [PRED] **entailment** [COEFF] 4.5545

[P] An man wearing a yellow shirt, denim suspenders and an orange hat reading under the rear tire of a vehicle as a child watches.

[H] A person wears a shirt and hat doing something under the back of a vehicle while a child looks.

[LABEL] **entailment** [PRED] **entailment** [COEFF] 4.5176

[P] A group of young men stand and sit around a fire pit while drinking and grilling their food.

[H] A group of people are drinking and cooking food.

[LABEL] **entailment** [PRED] **entailment** [COEFF] 4.4686

[P] The small girl in the hello kitty gloves and red snowsuit smiles while sitting on a large snowball.

[H] The girl smiles while sitting on a snowball.

[LABEL] entailment [PRED] entailment [COEFF] 4.4354

[P] A woman, wearing a white shirt, smiles as she unfolds her napkin prior to eating her lunch at the red table.

[H] A woman smiles as she unfolds a napkin

[LABEL] entailment [PRED] entailment [COEFF] 4.4173

[P] A woman and four guys by the river talking and drinking some beer.

[H] A group of people are talking and drinking.

[LABEL] entailment [PRED] entailment [COEFF] 4.4161

[P] A little girl wearing pink is blowing bubbles with her eyes closed, outdoors.

[H] A girl is blowing bubbles and closing her eyes.

[LABEL] entailment [PRED] entailment [COEFF] 4.3622

[P] A thai buddhist temple is the center of commerce, widely dominated by telephone wires and oncoming traffic.

[H] A buddhist temple is surrounded by telephone wires and traffic.

[LABEL] entailment [PRED] entailment [COEFF] 4.3527

[P] A little boy with a blue goggles and headset is wearing a black shirt with a number on it and a gray shorts.

[H] A child wears clothes and goggles.

[LABEL] entailment [PRED] entailment [COEFF] 4.2656

[P] Several people sitting on a bench watching their leashed dogs outside.

[H] People sit on a bench and watch their dogs.

[LABEL] entailment [PRED] entailment [COEFF] 4.1380

[P] A man wearing a white shirt has both his arms in the air

[H] A man has his arms in the air.

[LABEL] entailment [PRED] entailment [COEFF] 4.1131

[P] Asian people dressed in costumes and some holding orange signs.

[H] Asians holding signs in costume.

[LABEL] entailment [PRED] entailment [COEFF] 4.0979

[P] Coeds sit on a stone picnic table and eat lunch in the courtyard.

[H] People sit on a picnic table and eat lunch.

[LABEL] entailment [PRED] entailment [COEFF] 4.0498

[P] Two children with necklaces, painted faces and earrings embrace near a thatched object on a sunny day.

[H] Two children have their faces painted.

[LABEL] entailment [PRED] entailment [COEFF] 4.0446

[P] A man with a brown mohawk and white shirt is wrapping his arm.

[H] There is a man wrapping his arm.

## 1.116 Component 115

[LABEL] **contradiction** [PRED] **contradiction** [COEFF] 9.6224

[P] A man is laying in a small multicolor tent.

[H] A man is laying in a small spaceship

[LABEL] **neutral** [PRED] **contradiction** [COEFF] 8.5127

[P] A group of adults and children gather around to plant a baby tree.

[H] The people are planting a pine tree.

[LABEL] **contradiction** [PRED] **contradiction** [COEFF] 8.2605

[P] Two babies standing and each holding a toy.

[H] Two babies standing and each holding a whale.

[LABEL] **neutral** [PRED] **contradiction** [COEFF] 7.7120

[P] A man eating a pink candy bunny.

[H] He eats a gertrude hawk easter bunny.

[LABEL] **contradiction** [PRED] **contradiction** [COEFF] 7.6170

[P] A man with sunglasses rides a scooter.

[H] The man who is shown is riding a camel.

[LABEL] **neutral** [PRED] **contradiction** [COEFF] 7.4105

[P] A distored image of a man drinking a green liquid in a mug.

[H] The man is drinking lime juice.

[LABEL] **contradiction** [PRED] **contradiction** [COEFF] 7.3653

[P] A woman draws a floral design on a clay pot.

[H] The woman draws a star on the pot.

[LABEL] **contradiction** [PRED] **contradiction** [COEFF] 7.2660

[P] A small baby is in a plastic cradle.

[H] The baby is in an antique oak cradle.

[LABEL] **contradiction** [PRED] **contradiction** [COEFF] 7.1593

[P] A woman wearing sunglasses is drinking a bottle of water

[H] The woman is drinking orange juice.

[LABEL] **contradiction** [PRED] **contradiction** [COEFF] 6.9471

[P] An asian boy eating a piece of cake.

[H] The boy is eating pineapples.

[LABEL] **contradiction** [PRED] **contradiction** [COEFF] 6.8867

[P] Two women eating soup in a restaurant.



[H] The two women are eating spaghetti.

[LABEL] **neutral** [PRED] **contradiction** [COEFF] 6.7696

[P] Man playing with a dog with a yellow ball

[H] A man is playing with his dog with a tennis ball.

[LABEL] **contradiction** [PRED] **contradiction** [COEFF] 6.6552

[P] A man is standing in a crowd holding up a sign.

[H] A man holds up a candle.

[LABEL] **contradiction** [PRED] **contradiction** [COEFF] 6.5735

[P] Costumed people walk down a japanese street.

[H] The people are dressed casually in a pub.

[LABEL] **neutral** [PRED] **contradiction** [COEFF] 6.5394

[P] A young child is watching a toy construction brick construct.

[H] A child is using lincoln logs.

[LABEL] **contradiction** [PRED] **contradiction** [COEFF] 6.5158

[P] A man wearing a striped shirt eats some candy.

[H] A man is eating a piece of fruit.

### 1.117 Component 116

[LABEL] **contradiction** [PRED] **contradiction** [COEFF] 62.7051

[P] Three people playing with a red ball in a large sandy area with a tree in the background.

[H] The people are inside.

[LABEL] **contradiction** [PRED] **contradiction** [COEFF] 59.4117

[P] A person sitting by a tree underneath a canopy of trees.

[H] The person is inside

[LABEL] **contradiction** [PRED] **contradiction** [COEFF] 54.7627

[P] Two young girls are playing in the forest ; the younger one is climbing a short tree and is about 2 feet off the ground.

[H] The girls are inside.

[LABEL] **contradiction** [PRED] **contradiction** [COEFF] 49.4914

[P] The little brown dog is running through a clover field with a white object in its mouth.

[H] The dog is inside

[LABEL] **contradiction** [PRED] **contradiction** [COEFF] 48.9184

[P] Two kids standing in front of an open wooden fence, both wearing pink pants with a long - sleeved shirt, while one girl is waving.

[H] The people are inside.

[LABEL] **contradiction** [PRED] **contradiction** [COEFF] 47.0156

[P] A man is running on a bridge, while a dog is standing between two men on the bridge as well.  
[H] The people are inside

[LABEL] entailment [PRED] contradiction [COEFF] 45.8551

[P] A man looking through a microscope while working on a circuit board.  
[H] The man is inside

[LABEL] contradiction [PRED] contradiction [COEFF] 45.7596

[P] A woman, wearing red and black biking gear, biking up a hill.  
[H] The person is inside.

[LABEL] contradiction [PRED] contradiction [COEFF] 44.0882

[P] People leaning on a railing at a river.  
[H] The people are inside

[LABEL] contradiction [PRED] contradiction [COEFF] 42.8124

[P] A man in the city outside a building standing on the steps.  
[H] The man is inside.

[LABEL] contradiction [PRED] contradiction [COEFF] 42.7077

[P] A street crossing where a woman is walking her bike across  
[H] The woman is inside.

[LABEL] contradiction [PRED] contradiction [COEFF] 41.3008

[P] People are walking on a busy sidewalk in front of a corner store called " lyppens and schipper. "  
[H] The people are inside.

[LABEL] contradiction [PRED] contradiction [COEFF] 39.2646

[P] A girl is laying in the grass and a man is sitting on a rock.  
[H] The people are inside.

[LABEL] entailment [PRED] contradiction [COEFF] 38.7524

[P] A group of people sitting outdoors.  
[H] The people are inside.

[LABEL] contradiction [PRED] contradiction [COEFF] 37.7485

[P] A woman with a bag stands on a street near a man leaning on a wall.  
[H] The couple is inside

[LABEL] contradiction [PRED] contradiction [COEFF] 37.6953

[P] A dog turns on the grass to persue a flying ball.  
[H] The dog is inside

## 1.118 Component 117

[LABEL] neutral [PRED] neutral [COEFF] 52.7211

[P] Two men, one in a red jersey holding a ball and the other in a blue jersey, run on a grassy field.  
[H] The men are friends.

[LABEL] **neutral** [PRED] **neutral** [COEFF] 46.7204  
[P] Six musicians - four violinists, a cellist, and a drummer, play on stage for an audience.  
[H] The musicians are friends.

[LABEL] **neutral** [PRED] **neutral** [COEFF] 44.2389  
[P] A group of kids are sitting around a room playing a board game.  
[H] The kids are friends.

[LABEL] **neutral** [PRED] **neutral** [COEFF] 44.1432  
[P] Two men are sitting on their bikes, surrounded by a crowd.  
[H] The two men are best friends.

[LABEL] **neutral** [PRED] **neutral** [COEFF] 43.3130  
[P] Three children are playing in the water near a boat.  
[H] The children are best friends.

[LABEL] **neutral** [PRED] **neutral** [COEFF] 43.3105  
[P] Two children, one wearing purple, the other black, ride a single bike on the pavement.  
[H] The two children are best friends.

[LABEL] **neutral** [PRED] **neutral** [COEFF] 42.7527  
[P] People wearing hawaiian shirts hold buckets by the water.  
[H] The people are friends.

[LABEL] **neutral** [PRED] **neutral** [COEFF] 41.6010  
[P] Two men wearing sunglasses, one wearing a cowboy hat and both in blue shirts, sit and talk.  
[H] The two men sitting and talking are friends.

[LABEL] **neutral** [PRED] **neutral** [COEFF] 41.1866  
[P] A woman in a bridal gown holds a bouquet of flowers in the air as a group of women watch with the ocean in the background.  
[H] The group of women are all friends.

[LABEL] **neutral** [PRED] **neutral** [COEFF] 40.5902  
[P] Group of three people playing jenga.  
[H] The people are friends.

[LABEL] **neutral** [PRED] **neutral** [COEFF] 39.8997  
[P] Two young black men in blue jeans sit in front of a hammock.  
[H] The men are friends.

[LABEL] **neutral** [PRED] **neutral** [COEFF] 39.1767  
[P] A lady wearing blue and a lady wearing white are playing tennis.  
[H] The woman are friends.

[LABEL] **neutral** [PRED] **neutral** [COEFF] 38.8077

[P] People tend canoes at the edge of a body of water during a dimly lit time of day.

[H] The people are all friends

[LABEL] **neutral** [PRED] **neutral** [COEFF] 37.2322

[P] Two white - skinned and one dark - skinned man are sitting side by side in jeans and black shirts.

[H] The men are good friends.

[LABEL] **neutral** [PRED] **neutral** [COEFF] 35.6334

[P] Two middle - aged women crossing a city street.

[H] The women are friends.

[LABEL] **neutral** [PRED] **neutral** [COEFF] 33.9447

[P] A group of teenagers standing outside of a convenience store.

[H] The group of teenagers are best friends.

### 1.119 Component 118

[LABEL] **contradiction** [PRED] **contradiction** [COEFF] 10.9651

[P] A crowd of people are clapping.

[H] People sleeping on ground

[LABEL] **contradiction** [PRED] **contradiction** [COEFF] 10.3826

[P] People running in a marathon in running clothes.

[H] A group of people sleeping in a house.

[LABEL] **contradiction** [PRED] **contradiction** [COEFF] 9.2837

[P] A group of men is standing around a table and looking at a map.

[H] A group of men sleeping in the hay.

[LABEL] **contradiction** [PRED] **contradiction** [COEFF] 9.2461

[P] A couple posing in front of a picture wall

[H] A couple sleeping in front of a wall.

[LABEL] **contradiction** [PRED] **contradiction** [COEFF] 8.7724

[P] Two females running in race.

[H] Two females sleeping on a sofa.

[LABEL] **contradiction** [PRED] **contradiction** [COEFF] 8.7451

[P] A woman walking down the sidewalk beside a cheeseburger advertisement.

[H] A woman asleep on her couch.

[LABEL] **contradiction** [PRED] **contradiction** [COEFF] 8.6318

[P] Two women are communicating at a restaurant.

[H] Two men sleeping.

[LABEL] **contradiction** [PRED] **contradiction** [COEFF] 8.1410  
[P] A guy standing and talking in front of a group of people.  
[H] A man sleeping at home.

[LABEL] **contradiction** [PRED] **contradiction** [COEFF] 8.1201  
[P] Two women waiting at the subway station.  
[H] A man sleeping in the subway station.

[LABEL] **contradiction** [PRED] **contradiction** [COEFF] 8.0885  
[P] Women are standing next to a produce stand.  
[H] Woman resting in sofa

[LABEL] **contradiction** [PRED] **contradiction** [COEFF] 8.0600  
[P] A woman scantily dressed in a tribal green and blue costume dances in a parade while onlookers watch.  
[H] A man in outer space.

[LABEL] **contradiction** [PRED] **contradiction** [COEFF] 8.0524  
[P] Someone on a rooftop jumping on some sort of a board caught in midair.  
[H] A person sitting inside a kitchen.

[LABEL] **contradiction** [PRED] **contradiction** [COEFF] 7.8220  
[P] Several women sitting at a table at a restaurant wearing islamic headdresses.  
[H] Several men sleeping under a table.

[LABEL] **contradiction** [PRED] **contradiction** [COEFF] 7.1605  
[P] Woman dressed in brown african attire pushing a toddler in a stroller.  
[H] Man in a car alone.

[LABEL] **contradiction** [PRED] **contradiction** [COEFF] 7.0550  
[P] Man smoking on a couch.  
[H] A woman gardening

[LABEL] **contradiction** [PRED] **contradiction** [COEFF] 6.9380  
[P] The man holds a wooden paddle in a canoe with his dog.  
[H] A man sitting on the beach alone.

## 1.120 Component 119

[LABEL] **entailment** [PRED] **entailment** [COEFF] 15.9081  
[P] Several young people sit at a table playing poker.  
[H] Youthful human beings are gathered around a flat surface to play a card game.

[LABEL] **entailment** [PRED] **neutral** [COEFF] 15.6571  
[P] A group of hip young people walk down the street in a residential neighborhood.  
[H] People are hanging outside near houses.

[LABEL] **entailment** [PRED] **entailment** [COEFF] 15.3126  
[P] Two boys in red soccer uniforms stand in a green field.  
[H] Two youths wearing soccer gear are ready on the field.

[LABEL] **entailment** [PRED] **neutral** [COEFF] 14.7159  
[P] Two people who are making there way between rocks.  
[H] People climb amongst rocks.

[LABEL] **neutral** [PRED] **entailment** [COEFF] 14.6527  
[P] A group of spectators outside in the cold, all focusing on the same object.  
[H] A group of tourists look at some attraction on a cold day.

[LABEL] **entailment** [PRED] **neutral** [COEFF] 14.0679  
[P] A man is standing next to a woman and he is holding an electronic device to his ear.  
[H] A man is talking to someone on a cell phone while a person nearby looks ahead.

[LABEL] **contradiction** [PRED] **entailment** [COEFF] 13.8594  
[P] A truck has just crashed into the back of another truck.  
[H] A truck has caused an accident by hitting the driver side door of another truck.

[LABEL] **neutral** [PRED] **neutral** [COEFF] 13.6216  
[P] Cowboy turns back to wave out of the corral at a rodeo.  
[H] A bull rider is preparing to perform in front of a crowd

[LABEL] **entailment** [PRED] **entailment** [COEFF] 13.6076  
[P] People standing on a crowded sidewalk.  
[H] A group waiting beside a street

[LABEL] **neutral** [PRED] **neutral** [COEFF] 13.5987  
[P] Two kids running down a sand dune to the beach.  
[H] Kids hop in the sand near the beach.

[LABEL] **entailment** [PRED] **entailment** [COEFF] 13.5208  
[P] Five children are standing in front of a wooden hut.  
[H] Some children are gathered in front of a small building.

[LABEL] **contradiction** [PRED] **neutral** [COEFF] 13.0731  
[P] A young asian boy leaps for joy into a pool of water, his tongue stuck out for joy.  
[H] A boy surfs a crossed the water with a big cheesy smile.

[LABEL] **neutral** [PRED] **entailment** [COEFF] 13.0359  
[P] A group of people are standing around on a street.  
[H] A group of people have gathered in the street.

[LABEL] **neutral** [PRED] **entailment** [COEFF] 12.8304  
[P] The men are wearing blue shirts and laying on the benches.

[H] The people are taking a nap.

[LABEL] **neutral** [PRED] **neutral** [COEFF] 12.7218

[P] A lady in a white t - shirt and blue jeans spills her drink onto the floor while the other lady in a yellow t - shirt and sunglasses stares at her.

[H] A ladies drink got knocked over by another person being bumped into her and then she looks at the mess on the ground.

[LABEL] **neutral** [PRED] **entailment** [COEFF] 11.8435

[P] Individual trying a task never done before but watching his image in the water below him.

[H] Someone is looking at his reflection in a river.

### 1.121 Component 120

[LABEL] **neutral** [PRED] **neutral** [COEFF] 48.9839

[P] Four people are kicking a soccer ball in a basketball court.

[H] The people are women

[LABEL] **neutral** [PRED] **neutral** [COEFF] 45.9740

[P] Three people walking along a stream in a jungle.

[H] The people are women

[LABEL] **neutral** [PRED] **neutral** [COEFF] 45.4350

[P] A group of people crossing a busy street.

[H] The people are women.

[LABEL] **neutral** [PRED] **neutral** [COEFF] 38.8998

[P] Two young children are walking through a park.

[H] The children are girls.

[LABEL] **neutral** [PRED] **neutral** [COEFF] 36.8673

[P] A group of people waiting at a food stand, on a street corner.

[H] The people are women

[LABEL] **neutral** [PRED] **neutral** [COEFF] 36.7468

[P] Three people sit on a bench under palm trees.

[H] The people are sisters

[LABEL] **neutral** [PRED] **neutral** [COEFF] 36.3623

[P] A group of elderly individuals are standing in a circle holding hands while wearing green and white outfits

[H] The elderly individuals holding hands are all females.

[LABEL] **neutral** [PRED] **neutral** [COEFF] 31.0868

[P] Two women are crossing a bridge over a narrow waterway.

[H] The women are sisters.

[LABEL] **neutral** [PRED] **neutral** [COEFF] 30.8726

[P] An athlete swimming during a swim meet.

[H] The athlete is a woman

[LABEL] **neutral** [PRED] **neutral** [COEFF] 30.4361

[P] A dirt biker performs a trick in midair.

[H] The dirt biker is a girl.

[LABEL] **neutral** [PRED] **neutral** [COEFF] 28.2900

[P] A group of young people are hanging out together outside in a commercial area.

[H] The people are women

[LABEL] **neutral** [PRED] **neutral** [COEFF] 27.0876

[P] Two children sitting on a deer statue for a photo.

[H] The children are siblings.

[LABEL] **neutral** [PRED] **neutral** [COEFF] 26.7918

[P] A woman is looking out the window up at the sky.

[H] The woman is a mother

[LABEL] **neutral** [PRED] **neutral** [COEFF] 26.6566

[P] Four individuals donning snowshoes jump simultaneously to post for a picture atop a snowy mountain.

[H] The people are women

[LABEL] **neutral** [PRED] **neutral** [COEFF] 25.9891

[P] Two people are shopping in a supermarket with international flags above their heads.

[H] The people are women

[LABEL] **neutral** [PRED] **neutral** [COEFF] 24.9282

[P] A low angled shot of skateboarder in midair while doing a trick, with the blue sky and white clouds in the background.

[H] The skateboarder is a girl

## 1.122 Component 121

[LABEL] **entailment** [PRED] **entailment** [COEFF] 10.6809

[P] Man carries empty coke bottles on his head across dirt road.

[H] On a dirt road there is a man with empty coke bottles on his head.

[LABEL] **entailment** [PRED] **entailment** [COEFF] 8.3960

[P] A large crowd of people are sitting outside of a store.

[H] A large group is gathered outside of a store.

[LABEL] **entailment** [PRED] **entailment** [COEFF] 8.1013

[P] A girl in a red dress plays a red cello.

[H] A girl playing a red cello is wearing a red dress.



[LABEL] entailment [PRED] entailment [COEFF] 7.6267  
[P] The two girls hold hands with one another while they skate on the ice.  
[H] Two girls hold hands while skating on ice.

[LABEL] entailment [PRED] entailment [COEFF] 7.5344  
[P] A group of people in white shirts stand on a grass pitch covered with many dark balls.  
[H] A group of people wearing white is standing on grass.

[LABEL] entailment [PRED] entailment [COEFF] 7.2670  
[P] A woman with her head down is in a very run down area.  
[H] There is a woman in a run down area

[LABEL] entailment [PRED] entailment [COEFF] 6.9922  
[P] A bearded middle - aged man is dressed in a costume with a three - cornered hat and long shirt while holding a rifle across his arm.  
[H] A bearded middle - aged man is dressed in a costume

[LABEL] entailment [PRED] entailment [COEFF] 6.9515  
[P] A little boy wearing dress clothes is waiting by a door.  
[H] A little boy that is dressed up is waiting.

[LABEL] entailment [PRED] entailment [COEFF] 6.7817  
[P] A man with the mark of heavy age checks his document thoroughly.  
[H] An old man checks his paperwork.

[LABEL] entailment [PRED] entailment [COEFF] 6.7398  
[P] Four black children sit in the sand with various empty food containers.  
[H] Four black kids sit in the sand.

[LABEL] entailment [PRED] entailment [COEFF] 6.5558  
[P] A catamaran on the sea in a sailing competition.  
[H] The sailing competition on the sea includes a catamaran.

[LABEL] entailment [PRED] entailment [COEFF] 6.3941  
[P] Sled dogs pull a sled through a snowy forest.  
[H] Sled dogs are pulling a sled.

[LABEL] entailment [PRED] entailment [COEFF] 6.3211  
[P] A man in a leather outfit prepares to ride a motorcycle.  
[H] A man is wearing riding gear.

[LABEL] entailment [PRED] entailment [COEFF] 6.1934  
[P] The large black dog is running on the sand near the beach.  
[H] A black dog is running in the sand.

[LABEL] entailment [PRED] entailment [COEFF] 6.1604

[P] A quattro crane is operating during the train station construction.

[H] There was a crane being used on the train station.

[LABEL] entailment [PRED] entailment [COEFF] 6.0316

[P] A street vendor wearing white pants and black t - shirt is standing near his cart with cold beverages.

[H] A vendor is near his cart.

## 1.123 Component 122

[LABEL] entailment [PRED] entailment [COEFF] 16.0506

[P] A boy in red pants getting ready to slide down a metal slide.

[H] The boy is wearing red pants

[LABEL] entailment [PRED] entailment [COEFF] 16.0078

[P] A man in a black sweatshirt with blue trim playing a slot machine.

[H] The man wore a black sweatshirt.

[LABEL] entailment [PRED] entailment [COEFF] 14.3886

[P] A man in a crowd appears in a city scene wearing a mostly black outfit with a graphic picture on his shirt.

[H] The man is dressed in black.

[LABEL] entailment [PRED] entailment [COEFF] 13.7942

[P] A girl in a black shirt playing a carnival game.

[H] The girl is wearing a black shirt.

[LABEL] entailment [PRED] entailment [COEFF] 13.2166

[P] One boy in a black shirt is grabbing the flag of the boy in the red shirt with the football.

[H] The boy is wearing black.

[LABEL] entailment [PRED] entailment [COEFF] 12.5994

[P] A group of four people in blue clothes cleaning a hillside in front of a small town.

[H] Four people are wearing blue

[LABEL] entailment [PRED] entailment [COEFF] 12.3367

[P] There is a large crowd of people and a man with a blue shirt is standing far above the crowd.

[H] A man in blue is standing above the crowd

[LABEL] entailment [PRED] entailment [COEFF] 11.5623

[P] A man in a red uniform is standing in front of a train station sign.

[H] A man is standing in front of a sign.

[LABEL] entailment [PRED] entailment [COEFF] 11.1804

[P] A woman in a red shirt is raising her arm to the crowd below.

[H] A woman is wearing a red shirt.

[LABEL] entailment [PRED] entailment [COEFF] 11.0356

[P] A man in a black jacket clutching it to his chest.

[H] A man wearing a jacket.

[LABEL] entailment [PRED] entailment [COEFF] 10.6643

[P] A man in military garb holds a video camera and shows the viewfinder to a nearby boy in a brown shirt.

[H] A man is holding a video camera.

[LABEL] entailment [PRED] entailment [COEFF] 10.4181

[P] A singer in a black shirt is playing in a band.

[H] The singer in the band is wearing black.

[LABEL] entailment [PRED] entailment [COEFF] 10.2112

[P] A man in a gray shirt is standing in a crowded street at night.

[H] The man is wearing a gray shirt.

[LABEL] entailment [PRED] entailment [COEFF] 9.9977

[P] A man with brown pants is selling food from a mobile vending grill.

[H] A man is wearing brown pants selling food

[LABEL] entailment [PRED] entailment [COEFF] 9.6509

[P] A man with a ski mask, dressed all in black, plays guitar.

[H] A man dressed in black plays a guitar.

[LABEL] entailment [PRED] entailment [COEFF] 9.4927

[P] Man in black waits at crossing signal near large brick building.

[H] A man is wearing black crossing near a building.

## 1.124 Component 123

[LABEL] neutral [PRED] neutral [COEFF] 28.9187

[P] A man on a motorbike in midair

[H] The motorbike is white.

[LABEL] neutral [PRED] neutral [COEFF] 27.4318

[P] A woman holding an umbrella over a person in a race car.

[H] The woman is white

[LABEL] contradiction [PRED] neutral [COEFF] 27.3266

[P] Three children are standing outside with a bird flying by.

[H] The children are yellow.

[LABEL] neutral [PRED] neutral [COEFF] 27.0896

[P] An officer stands next to a car on a city street.

[H] The car is blue.

[LABEL] **neutral** [PRED] **neutral** [COEFF] 26.7509

[P] A young woman is drawing with a sharpie marker.

[H] The sharpie is black

[LABEL] **neutral** [PRED] **neutral** [COEFF] 26.2351

[P] Children paddle on a craft.

[H] The children are white

[LABEL] **neutral** [PRED] **neutral** [COEFF] 25.5820

[P] A slightly older picture of a mother and her newborn sitting next to the rotary dial phone

[H] The picture is black and white.

[LABEL] **neutral** [PRED] **neutral** [COEFF] 25.4434

[P] Two dogs running along a fence.

[H] One of the dogs is black.

[LABEL] **neutral** [PRED] **neutral** [COEFF] 23.9772

[P] A young man working at a computer.

[H] The man is white

[LABEL] **neutral** [PRED] **neutral** [COEFF] 23.9346

[P] A young child riding a bicycle across a suspension bridge with trees in the background.

[H] The bike is black

[LABEL] **neutral** [PRED] **neutral** [COEFF] 23.3191

[P] A man carrying a canoe while camping with his dog.

[H] The canoe is blue.

[LABEL] **neutral** [PRED] **neutral** [COEFF] 22.9606

[P] Silhouette of two people sitting on a dock at sunset

[H] The people on the dock are white.

[LABEL] **neutral** [PRED] **neutral** [COEFF] 22.6801

[P] Three people climbing rocks.

[H] The men are wearing black.

[LABEL] **neutral** [PRED] **neutral** [COEFF] 22.6277

[P] A man in a dress shirt and tie, wearing strange looking goggles, is sitting in a chair looking at his hand.

[H] The goggles are brown.

[LABEL] **neutral** [PRED] **neutral** [COEFF] 22.6006

[P] Older woman is dressed for colder weather.

[H] The woman is white

[LABEL] **neutral** [PRED] **neutral** [COEFF] 21.8960

[P] A man and a woman work in a field, both wearing large hats.

[H] The hats are yellow.

### 1.125 Component 124

[LABEL] **neutral** [PRED] **entailment** [COEFF] 8.6711

[P] A woman wearing a green shirt is giving a slide presentation on the upcoming zombie uprising.

[H] A woman is giving a presentation.

[LABEL] **entailment** [PRED] **entailment** [COEFF] 8.0515

[P] A woman in a white shirt is reaching for a soda bottle.

[H] A woman is reaching for a bottle.

[LABEL] **entailment** [PRED] **entailment** [COEFF] 6.9986

[P] A man in a black and blue checkered hooded sweater is looking at a levi's advertisement that says, " we are all workers. "

[H] A man is looking at an advertisement.

[LABEL] **entailment** [PRED] **entailment** [COEFF] 6.9761

[P] A woman holding a japanese flag is watching a young girl.

[H] A woman is watching a girl.

[LABEL] **entailment** [PRED] **entailment** [COEFF] 6.8971

[P] A woman in a mustard dress with a white purse is walking down the street in front of a brick building.

[H] A woman walks down the street

[LABEL] **entailment** [PRED] **entailment** [COEFF] 6.5718

[P] A blond woman with leopard print earrings records a video.

[H] A woman records a video.

[LABEL] **entailment** [PRED] **entailment** [COEFF] 6.2730

[P] Woman wearing pink top is getting a pedicure.

[H] A woman is getting a pedicure.

[LABEL] **entailment** [PRED] **entailment** [COEFF] 6.0203

[P] A young girl in a yellow shirt is holding a bird for a speaker.

[H] A girl is holding a bird for a speaker.

[LABEL] **entailment** [PRED] **entailment** [COEFF] 5.8272

[P] An older woman wearing a brown shirt gives a presentation.

[H] A woman gives a presentation.

[LABEL] **entailment** [PRED] **entailment** [COEFF] 5.7471

[P] An older brown - haired woman is holding a young blond girl in pink pajamas as another brunette woman in a green shirt looks on.

[H] A woman holds a young girl.

[LABEL] **entailment** [PRED] **entailment** [COEFF] 5.5664

[P] A woman in pigtails talks to the red - hatted man under the shade of a tree.

[H] A woman is talking to a man.

[LABEL] **entailment** [PRED] **entailment** [COEFF] 5.4430

[P] A man in a tank top looks at a woman near a water sculpture.

[H] A man looks at a woman.

[LABEL] **entailment** [PRED] **entailment** [COEFF] 5.3709

[P] A woman, in a t - shirt and a skirt, leans forward in an attempt to throw a large sized black ball.

[H] A woman attempts to throw a ball.

[LABEL] **entailment** [PRED] **entailment** [COEFF] 5.3694

[P] A boy in jeans and a gray t - shirt is gazing at the hand he has raised toward his breast bone.

[H] A boy is gazing at the hand he has raised toward his breast bone.

[LABEL] **entailment** [PRED] **entailment** [COEFF] 5.3577

[P] A man in a blue shirt helps a small girl in a pink coat up a hill on a rope.

[H] A man is helping a small girl.

[LABEL] **entailment** [PRED] **entailment** [COEFF] 5.2904

[P] A woman in a red dress covers another woman's eyes.

[H] A woman covering another woman's eyes.

## 1.126 Component 125

[LABEL] **contradiction** [PRED] **contradiction** [COEFF] 14.2592

[P] A few men are standing around a fruit stall.

[H] The men are sitting on the stall.

[LABEL] **contradiction** [PRED] **contradiction** [COEFF] 12.4092

[P] Two small children standing next to a jeans advertisement.

[H] Two children sitting on a bench.

[LABEL] **contradiction** [PRED] **contradiction** [COEFF] 11.3367

[P] A girl standing in an enclosed place

[H] A girl is sitting in a field.

[LABEL] **contradiction** [PRED] **contradiction** [COEFF] 11.1984

[P] A person is standing in a green field in front of several colorful hot air balloons.

[H] The person is sitting in the field.

[LABEL] **contradiction** [PRED] **contradiction** [COEFF] 11.1363

[P] Two men standing outside next to a building.

[H] The men are sitting inside the building.

[LABEL] **contradiction** [PRED] **contradiction** [COEFF] 10.7264

[P] Two us navy workers stand at an event.  
[H] Two us navy workers sitting at a table.

[LABEL] **contradiction** [PRED] **contradiction** [COEFF] 10.6373  
[P] A group of people are standing in a courtyard.  
[H] People are sitting outside.

[LABEL] **contradiction** [PRED] **contradiction** [COEFF] 9.9032  
[P] An asian man standing next to a door points to something.  
[H] A man is sitting reading a paper.

[LABEL] **contradiction** [PRED] **contradiction** [COEFF] 9.7613  
[P] A woman is standing in front of a glass door in a red dress.  
[H] A woman is sitting in a beauty parlor.

[LABEL] **contradiction** [PRED] **contradiction** [COEFF] 9.6911  
[P] A man in shorts with no shirt is standing in front of a group of people on the beach.  
[H] A man is laying down on the beach.

[LABEL] **contradiction** [PRED] **contradiction** [COEFF] 9.3624  
[P] A man holding paper while standing on the sidewalk.  
[H] A man sits on the sidewalk.

[LABEL] **contradiction** [PRED] **contradiction** [COEFF] 9.2998  
[P] A family standing in front of tall trees  
[H] A family is sitting inside and watching television.

[LABEL] **contradiction** [PRED] **contradiction** [COEFF] 9.1812  
[P] A woman standing in a dark doorway, waiting to be let into the building.  
[H] A woman sits on her couch.

[LABEL] **contradiction** [PRED] **contradiction** [COEFF] 8.9056  
[P] A woman standing in a room that is white with numbers in a circle around her.  
[H] A woman sleeping outdoors.

[LABEL] **contradiction** [PRED] **contradiction** [COEFF] 8.8030  
[P] A man standing next an older silver van.  
[H] A man is sitting in a cafe.

[LABEL] **contradiction** [PRED] **contradiction** [COEFF] 8.6167  
[P] A man is standing on two saw horses and chiseling something into a stone.  
[H] A man is sitting down.

## 1.127 Component 126

[LABEL] **contradiction** [PRED] **contradiction** [COEFF] 26.1901

[P] A white dog with black spots is catching a baseball with its mouth.

[H] The dog is purple.

[LABEL] **contradiction** [PRED] **contradiction** [COEFF] 24.8380

[P] A white water bird taking flight from a lake.

[H] The bird is red.

[LABEL] **contradiction** [PRED] **contradiction** [COEFF] 22.6938

[P] A surfer wearing a black and red wetsuit on a white surfboard, slices through the waves on a bright blue ocean.

[H] The wetsuit is green.

[LABEL] **contradiction** [PRED] **contradiction** [COEFF] 20.6633

[P] Two people, with buildings behind them, are standing near a blue car with two doors open.

[H] The car is orange.

[LABEL] **contradiction** [PRED] **contradiction** [COEFF] 20.6281

[P] A young male boy is sitting backwards on a gray mule in the dessert.

[H] The mule is purple.

[LABEL] **contradiction** [PRED] **contradiction** [COEFF] 20.5131

[P] Two women are standing in the snow looking towards a tower with a orange cone shaped light.

[H] The light is red.

[LABEL] **contradiction** [PRED] **contradiction** [COEFF] 18.3059

[P] A woman in a orange and brown wrap over her green shirt shovels a brown material into lines on a cement pad.

[H] The wrap is purple.

[LABEL] **contradiction** [PRED] **contradiction** [COEFF] 17.9361

[P] A musical band wearing dark green jackets and black pants are marching down a street while playing their instruments.

[H] The jacket is red.

[LABEL] **neutral** [PRED] **contradiction** [COEFF] 17.5051

[P] A big, brown dog is sleeping next to a small black and white cat.

[H] The dog is red.

[LABEL] **contradiction** [PRED] **contradiction** [COEFF] 17.4657

[P] A boy wearing a blue shirt looks up at the parade costume.

[H] The boy is wearing pink

[LABEL] **entailment** [PRED] **contradiction** [COEFF] 17.1902

[P] A woman with black hair wearing a turquoise shirt presses a key on an ipad while sitting at a table with craft supplies on it.

[H] The woman is wearing green.

[LABEL] **contradiction** [PRED] **contradiction** [COEFF] 16.9767



[P] A car is driving towards a green mountain.

[H] The mountain is blue

[LABEL] **contradiction** [PRED] **contradiction** [COEFF] 16.7110

[P] Two people engage in a martial arts fight on a red and blue mat.

[H] The mat is green

[LABEL] **contradiction** [PRED] **contradiction** [COEFF] 16.6149

[P] A group of workers wearing bright orange jackets with reflective stripes, a man in the middle is holding a sign.

[H] The jackets are blue.

[LABEL] **contradiction** [PRED] **contradiction** [COEFF] 16.1995

[P] A child looks bewildered as he lies next to his red sled.

[H] The slide is blue.

[LABEL] **contradiction** [PRED] **contradiction** [COEFF] 15.6213

[P] Four people are sitting on blue and green couches, while a fifth man sitting aside looks on, underneath a sprawling red tree.

[H] The couches are pink.

## 1.128 Component 127

[LABEL] **neutral** [PRED] **neutral** [COEFF] 21.0108

[P] Three people dining while sitting outside at a table under a brown awning that reads union market.

[H] Three people dining under a brown awning that reads union market for the very first time.

[LABEL] **neutral** [PRED] **neutral** [COEFF] 20.0252

[P] The young girl is holding a yellow leash attached to a sheep.

[H] A young girl is leading a sheep around on a leash after it got lost.

[LABEL] **neutral** [PRED] **neutral** [COEFF] 19.8409

[P] A man looking surprised at the camera.

[H] A man looks at the camera, after getting surprised at his party.

[LABEL] **neutral** [PRED] **neutral** [COEFF] 18.3854

[P] A man in camouflage on the beach looks through a telescope at night.

[H] A man in camouflage on the beach looks through a telescope at night on a full moon and during a meteor shower.

[LABEL] **neutral** [PRED] **neutral** [COEFF] 16.2067

[P] A man is sitting in a booth and playing a harmonica.

[H] A man is sitting in a booth and playing a harmonica begging for money.

[LABEL] **neutral** [PRED] **neutral** [COEFF] 16.1625

[P] A man sitting on a bicycle.

[H] A man sitting on a bicycle in the rain.

[LABEL] **neutral** [PRED] **neutral** [COEFF] 16.1364

[P] A man wearing an orange vest is in a lift while extending one arm out.

[H] A young man in the lift was wearing an orange vest.

[LABEL] **neutral** [PRED] **neutral** [COEFF] 15.7636

[P] An eccentrically dressed man and his dog are sitting on a bench with a guitar and harmonica.

[H] An eccentrically dressed man and his dog are sitting on a bench with a guitar and harmonica as people put money in the hat next to the man

[LABEL] **neutral** [PRED] **neutral** [COEFF] 15.5753

[P] Boy holding an icicle pretending it is a gun.

[H] The boy pretended the icicle was a gun while his father watched.

[LABEL] **neutral** [PRED] **neutral** [COEFF] 15.1644

[P] A black child is carrying a large bag over their head.

[H] A child is carrying a bag over their head coming back from the store.

[LABEL] **neutral** [PRED] **neutral** [COEFF] 14.5993

[P] A white dog is carrying a ball across the grass nearby a fence.

[H] A white dog is carrying a ball to play with his owner

[LABEL] **neutral** [PRED] **neutral** [COEFF] 14.4978

[P] Two woman stand at a bus stop waiting, one is wearing a purple collared shirt and the other is blurry wearing the black shirt.

[H] Two woman stand at a bus stop waiting, one is wearing a purple collared shirt and blue hat and the other is blurry wearing the black shirt.

[LABEL] **neutral** [PRED] **neutral** [COEFF] 14.2820

[P] The back of two people sitting on one seat in a bus.

[H] Two people sharing a seat on the bus because there's no more room.

[LABEL] **neutral** [PRED] **neutral** [COEFF] 14.2063

[P] A man with the tennis racket is wearing a blue headband and blue wristbands and playing tennis.

[H] A man with the tennis racket is wearing a blue headband and blue wristbands and playing tennis with a woman.

[LABEL] **neutral** [PRED] **neutral** [COEFF] 14.1489

[P] A little boy is holding a soda and a green balloon.

[H] A little boy is holding a soda and balloon for his sister.

[LABEL] **neutral** [PRED] **neutral** [COEFF] 14.1004

[P] Kids are jumping up in the air over the snow covered ground.

[H] Kids are jumping for joy in the snow because school was cancelled.

## 1.129 Component 128

[LABEL] entailment [PRED] neutral [COEFF] 58.4957

[P] A person wearing a dark blue covered up attire from head to toe, with a mask and vest, holding a thin sword.

[H] A man is holding a sword.

[LABEL] entailment [PRED] neutral [COEFF] 51.9414

[P] A person in a white coat and pink pants snowboards at the " snow park ".

[H] A man wear white coat in near snowboards at the " snow park ".

[LABEL] neutral [PRED] neutral [COEFF] 48.5448

[P] A person, whose face is blocked, is working on a large wooden loom.

[H] A man, whose face is blocked, is working on a large wooden loom.

[LABEL] neutral [PRED] neutral [COEFF] 44.7209

[P] Two people wearing life jackets while seated on a boat.

[H] There are two men wearing life jackets.

[LABEL] neutral [PRED] neutral [COEFF] 43.0601

[P] Three people are crossing a street in new york city.

[H] Three men are walking across the street.

[LABEL] entailment [PRED] neutral [COEFF] 42.3008

[P] The person is standing in the boat.

[H] The man is on a boat

[LABEL] neutral [PRED] entailment [COEFF] 41.7981

[P] A person wearing a yellow t - shirt, inside a building has on a motorcycle helmet.

[H] A man wears a helmet indoors.

[LABEL] neutral [PRED] neutral [COEFF] 40.9398

[P] Person surfs the waves in view of an oncoming boat.

[H] A man is surfing.

[LABEL] entailment [PRED] neutral [COEFF] 40.7067

[P] The person is standing on white ice.

[H] A man can be seen on a sheet of ice.

[LABEL] neutral [PRED] neutral [COEFF] 39.0688

[P] Two people cleaning wearing breathing masks

[H] Two men cleaning in breathing masks

[LABEL] entailment [PRED] neutral [COEFF] 37.9753

[P] Two people, one in blue and one in red, stand in front of a building.

[H] Two men in red and blue stand in front of a building.

[LABEL] neutral [PRED] neutral [COEFF] 37.1314

[P] Four people are sitting on the wall.

[H] Four men sitting on a wall.

[LABEL] **entailment** [PRED] **neutral** [COEFF] 36.7847

[P] Person skateboarding on a wooden bench.

[H] The man skates on a bench

[LABEL] **neutral** [PRED] **entailment** [COEFF] 36.2121

[P] A street performer in a yellow shirt rides a high unicycle.

[H] A man shows off his unicycle.

[LABEL] **entailment** [PRED] **entailment** [COEFF] 33.8566

[P] A boy in a green sweatshirt and blue jeans performs a trick on a skateboard while spectators in the background are looking on.

[H] A young man rides a skateboard.

[LABEL] **entailment** [PRED] **entailment** [COEFF] 33.5143

[P] A rock climber.

[H] A man is climbing

### 1.130 Component 129

[LABEL] **neutral** [PRED] **contradiction** [COEFF] 25.3669

[P] A woman in a gray shirt stands with her arm on her hip.

[H] The woman is wearing pants.

[LABEL] **neutral** [PRED] **contradiction** [COEFF] 24.8059

[P] A woman in a white shirt walks along a stone street.

[H] The woman is wearing a skirt.

[LABEL] **neutral** [PRED] **contradiction** [COEFF] 22.1744

[P] A man in a blue t - shirt is speaking into a blow horn towards a large group of people with bicycles.

[H] The man is wearing jeans.

[LABEL] **contradiction** [PRED] **contradiction** [COEFF] 21.1099

[P] A woman in a purple dress plays with her hair while waiting in a lobby.

[H] The woman is wearign pants

[LABEL] **contradiction** [PRED] **contradiction** [COEFF] 20.8689

[P] A little girl wears a white dress and pink flip - flops.

[H] The girl is wearing pants and boots.

[LABEL] **neutral** [PRED] **contradiction** [COEFF] 19.8888

[P] A man in a pink shirt sitting next to a small building.

[H] The man is wearing jeans and black shoes.

[LABEL] **contradiction** [PRED] **contradiction** [COEFF] 19.4214

[P] A boy wearing blue swim trunks is climbing on rocks with hotels on the beach in the distance.

[H] The boy is wearing pants.

[LABEL] **neutral** [PRED] **contradiction** [COEFF] 19.1651

[P] A boy in a black shirt puts his hands under the foot of a girl in a white shirt who holds his neck.

[H] The boy is wearing jeans.

[LABEL] **neutral** [PRED] **contradiction** [COEFF] 19.1515

[P] A man is wearing blue waving at a stopped bus.

[H] The man is wearing jeans.

[LABEL] **neutral** [PRED] **contradiction** [COEFF] 18.4170

[P] A man in a blue ball cap and wearing no shirt working on a roof.

[H] The man is wearing blue jeans.

[LABEL] **neutral** [PRED] **contradiction** [COEFF] 17.7088

[P] A brunette, caucasian man stands in a long - sleeved shirt with his cuffs rolled up using a sizable music mixing machine by dx.

[H] The man is wearing pants.

[LABEL] **contradiction** [PRED] **contradiction** [COEFF] 17.5016

[P] 3 men in t - shirt and shorts sitting on the grass eating food.

[H] The 3 men are in sweaters.

[LABEL] **neutral** [PRED] **contradiction** [COEFF] 16.5871

[P] A young girl in pink pants with white polka dots is studying something in her hand as she sits in a lush forest.

[H] The girl is wearing shoes.

[LABEL] **neutral** [PRED] **contradiction** [COEFF] 16.5601

[P] A man wearing a brown button - p shirt and plaid shorts doing a one handed handstand.

[H] The man is wearing socks.

[LABEL] **contradiction** [PRED] **contradiction** [COEFF] 15.8216

[P] A boy in a red shirt and white shorts is standing in the sand.

[H] The boy is wearing a tuxedo.

[LABEL] **contradiction** [PRED] **contradiction** [COEFF] 14.5056

[P] A little girl wearing a dress walks across a green lawn on a summer day with a home and trees in the background.

[H] The girl is wearing a pair of overalls.

### 1.131 Component 130

[LABEL] **entailment** [PRED] **entailment** [COEFF] 37.8389

[P] A man is teaching a class of young children to balance a ball that is red, green, blue and yellow

on top of their heads.

[H] A man is teaching a class.

[LABEL] entailment [PRED] entailment [COEFF] 30.4625

[P] A woman drawing a picture of two children.

[H] A woman is drawing a picture.

[LABEL] entailment [PRED] entailment [COEFF] 28.4456

[P] A small child points at a moped.

[H] A child points.

[LABEL] entailment [PRED] entailment [COEFF] 24.8889

[P] A biker on top of a shallow hill attempts a trick nearby a gate and grassy area.

[H] A biker attempts trick.

[LABEL] entailment [PRED] entailment [COEFF] 23.7668

[P] A guy is examining something under a microscope while people watch.

[H] A guy is examining something.

[LABEL] entailment [PRED] entailment [COEFF] 23.6497

[P] A man is laying out his merchandise to include eggs, chickens and vegetables.

[H] A man is laying out his merchandise.

[LABEL] entailment [PRED] entailment [COEFF] 23.2019

[P] A string quartet practices for an up - coming performance.

[H] A string quartet practicing.

[LABEL] entailment [PRED] entailment [COEFF] 22.0690

[P] A skateboarder performing a kickflip over short stairs.

[H] A skateboarder performs.

[LABEL] entailment [PRED] entailment [COEFF] 21.6936

[P] A little boy shows off his new shovel toy on christmas.

[H] A little boy shows off a toy.

[LABEL] entailment [PRED] entailment [COEFF] 21.3756

[P] A food cart is operated near an outdoor seating area.

[H] A food cart being operated.

[LABEL] entailment [PRED] entailment [COEFF] 21.2339

[P] One biker doing a stunt while onlookers watch in the far corner.

[H] One biker doing a stunt.

[LABEL] entailment [PRED] entailment [COEFF] 20.6224

[P] An artists is drawing a comical sketch of a young boy.

[H] An artist draws a sketch.

[LABEL] entailment [PRED] entailment [COEFF] 20.2549  
[P] A couple is photographed in front of a large outdoor fountain.  
[H] A couple is being photographed.

[LABEL] entailment [PRED] entailment [COEFF] 19.9815  
[P] Two women working on a yarn machine.  
[H] Two women working.

[LABEL] entailment [PRED] entailment [COEFF] 19.5288  
[P] A woman eats an ice cream cone.  
[H] A woman is eating.

[LABEL] neutral [PRED] entailment [COEFF] 19.3365  
[P] A person in a purple jacket is squatting around several moose.  
[H] A person is squatting

### 1.132 Component 131

[LABEL] entailment [PRED] entailment [COEFF] 6.9240  
[P] Man carries empty coke bottles on his head across dirt road.  
[H] On a dirt road there is a man with empty coke bottles on his head.

[LABEL] neutral [PRED] entailment [COEFF] 6.0952  
[P] A man sings on stage with a guitar.  
[H] A man is singing onstage.

[LABEL] entailment [PRED] entailment [COEFF] 5.9061  
[P] A little boy wearing dress clothes is waiting by a door.  
[H] A little boy that is dressed up is waiting.

[LABEL] entailment [PRED] entailment [COEFF] 5.8531  
[P] Four black children sit in the sand with various empty food containers.  
[H] Four black kids sit in the sand.

[LABEL] entailment [PRED] entailment [COEFF] 5.7036  
[P] A teenage girl is wearing a brown hat and a jacket with hearts on.  
[H] A girl is wearing a hat.

[LABEL] entailment [PRED] entailment [COEFF] 5.5301  
[P] A man in a leather outfit prepares to ride a motorcycle.  
[H] A man is wearing riding gear.

[LABEL] entailment [PRED] entailment [COEFF] 5.5255  
[P] A lady is taking the shoes off of the young girl she is carrying.  
[H] A lady is removing a girl's shoes.

[LABEL] **entailment** [PRED] **entailment** [COEFF] 5.5235

[P] Sunburned blond white woman sits on the ground outside, near three duffel bags.

[H] A woman is sitting on the ground.

[LABEL] **entailment** [PRED] **entailment** [COEFF] 5.4950

[P] A large crowd of people are sitting outside of a store.

[H] A large group is gathered outside of a store.

[LABEL] **entailment** [PRED] **entailment** [COEFF] 5.4581

[P] A group of climbers ascends a narrow, snowy mountain ridge.

[H] A group is climbing a mountain.

[LABEL] **entailment** [PRED] **entailment** [COEFF] 5.4458

[P] A men's track meet with eight competitors, every other runner wearing orange.

[H] A men's track meet with eight competitors

[LABEL] **entailment** [PRED] **entailment** [COEFF] 5.3480

[P] Local villagers are riding oxen carrying hay in man made wooden carriages traveling on a narrow street with gavel and trees on each side.

[H] Local villagers, riding oxen that are carrying hay, are riding on a narrow street.

[LABEL] **entailment** [PRED] **entailment** [COEFF] 5.3070

[P] An old man in a suit jacket and glasses is standing in front of an adults only establishment painted blue.

[H] An old man is in front of a building.

[LABEL] **entailment** [PRED] **entailment** [COEFF] 5.1593

[P] A girl in a red dress plays a red cello.

[H] A girl playing a red cello is wearing a red dress.

[LABEL] **entailment** [PRED] **entailment** [COEFF] 5.1246

[P] Person dressed in newspaper boy attire pouring drinks.

[H] A person is serving drinks.

[LABEL] **entailment** [PRED] **entailment** [COEFF] 5.0645

[P] One person stands on a cliff overlooking a broad valley.

[H] A person is standing on the cliffs.

### 1.133 Component 132

[LABEL] **contradiction** [PRED] **contradiction** [COEFF] 17.9612

[P] Three men are walking up hill.

[H] Three men are indoors.

[LABEL] **contradiction** [PRED] **contradiction** [COEFF] 16.9520

[P] A man in a yellow shirt and jeans is walking down the street drinking a beverage from a bottle.



[H] The man is indoors.

[LABEL] **contradiction** [PRED] **contradiction** [COEFF] 16.4411  
[P] A group of motorcyclist are ridding through the streets.  
[H] They are indoors.

[LABEL] **entailment** [PRED] **contradiction** [COEFF] 15.6762  
[P] A crowd of people gathered around the exit while a large ship is featured on the tv screen.  
[H] A group of people are indoors.

[LABEL] **contradiction** [PRED] **contradiction** [COEFF] 14.2680  
[P] A group of people walking outside a theme park in the middle of the day.  
[H] People are indoors.

[LABEL] **contradiction** [PRED] **contradiction** [COEFF] 13.7507  
[P] A downhill skier races near trees.  
[H] A skier is sitting.

[LABEL] **entailment** [PRED] **contradiction** [COEFF] 13.7198  
[P] A girl is jumping on the bed.  
[H] The girl is indoors.

[LABEL] **contradiction** [PRED] **contradiction** [COEFF] 13.3262  
[P] Three girls are sitting on the floor.  
[H] The girls are standing.

[LABEL] **contradiction** [PRED] **contradiction** [COEFF] 12.9772  
[P] People gather outdoors at a market.  
[H] The people are inside.

[LABEL] **neutral** [PRED] **contradiction** [COEFF] 12.6219  
[P] A construction worker working at a job site.  
[H] A construction worker is working outside.

[LABEL] **contradiction** [PRED] **contradiction** [COEFF] 12.4406  
[P] A group of people hanging out and playing a board game.  
[H] A person is playing indoors alone

[LABEL] **contradiction** [PRED] **contradiction** [COEFF] 12.3699  
[P] An elderly man pushes a cart with a loved one's memorial picture down the street.  
[H] An old man sits near a grave.

[LABEL] **contradiction** [PRED] **contradiction** [COEFF] 12.2753  
[P] Passersby in an outdoor mall.  
[H] The mall is indoor.

[LABEL] **contradiction** [PRED] **contradiction** [COEFF] 12.1801

[P] A man and woman behind a vegetable stand on a city street with parked vehicles and storefronts in the background.

[H] A man and a woman are standing in an empty street.

[LABEL] **entailment** [PRED] **contradiction** [COEFF] 12.1247

[P] A yellow atv is airborne in field of long grass.

[H] An atv is outside.

[LABEL] **contradiction** [PRED] **contradiction** [COEFF] 12.0954

[P] Carts are being driven through a crowded street.

[H] Carts are in the field.

### 1.134 Component 133

[LABEL] **entailment** [PRED] **entailment** [COEFF] 10.1675

[P] A man stands at the edge of the water near the rocks.

[H] A man is near a body of water.

[LABEL] **entailment** [PRED] **entailment** [COEFF] 9.6976

[P] A man stands proudly at the side of his green and blue boat.

[H] A man is near a boat.

[LABEL] **entailment** [PRED] **entailment** [COEFF] 8.6109

[P] A man in a red shirt is straddling the back end of his bike in midair by a tree.

[H] A man is near a bike.

[LABEL] **entailment** [PRED] **entailment** [COEFF] 8.2873

[P] A girl dressed in pink and white runs along the beach.

[H] A girl runs on a beach.

[LABEL] **entailment** [PRED] **entailment** [COEFF] 8.2567

[P] Two girls sit along a lake while a man in the background fishes

[H] Two girls sit near a lake

[LABEL] **entailment** [PRED] **entailment** [COEFF] 7.9562

[P] The camera catches some movement as a man walks in front of the alpha dental group building.

[H] A man is walking near a building.

[LABEL] **entailment** [PRED] **entailment** [COEFF] 7.7886

[P] A man looked very small, as he walked along the ancient building.

[H] A man looks small next to an old building.

[LABEL] **entailment** [PRED] **entailment** [COEFF] 7.7116

[P] A boy with a whistle around his neck is standing by a lake and gesturing.

[H] A boy is standing near a body of water.

[LABEL] entailment [PRED] entailment [COEFF] 7.4890

[P] There are four people dressed in orange clothes walking down the street.

[H] A couple of people walk along a street

[LABEL] entailment [PRED] entailment [COEFF] 7.4056

[P] Three people walk on grass adjacent to a river.

[H] There are people walking near a river.

[LABEL] entailment [PRED] entailment [COEFF] 7.2850

[P] A water bird standing at the ocean's edge.

[H] The bird stands near a body of water.

[LABEL] entailment [PRED] entailment [COEFF] 7.1595

[P] A white bird flies over a lake.

[H] A bird is near water.

[LABEL] entailment [PRED] entailment [COEFF] 6.9279

[P] A man in a blue shirt is sitting on a chair in the street.

[H] While sitting near a street the man is wearing a blue shirt

[LABEL] entailment [PRED] entailment [COEFF] 6.9083

[P] The little girl is carrying a pink and blue toy as she walks on the path.

[H] A girl walks through a path with her toy.

[LABEL] entailment [PRED] entailment [COEFF] 6.9014

[P] A man and woman walking past a record shop

[H] People are near a record shop

[LABEL] entailment [PRED] entailment [COEFF] 6.6642

[P] The worker is standing on a ladder on a city sidewalk repairing the building with a large drill.

[H] A worker is making repairs on a building.

### 1.135 Component 134

[LABEL] entailment [PRED] contradiction [COEFF] 85.4033

[P] Three women in dresses are walking down the street at night.

[H] The women are outside.

[LABEL] entailment [PRED] entailment [COEFF] 80.5553

[P] Man walking down the street is wearing a black suit and carrying a small white bag.

[H] The man is outside.

[LABEL] entailment [PRED] contradiction [COEFF] 75.7764

[P] A man in a dress shirt walking down a street in kuala lumpar

[H] The man is outside.

[LABEL] entailment [PRED] contradiction [COEFF] 75.0860

[P] An elderly woman rides a bicycle along a city street.

[H] An elderly woman is outside.

[LABEL] entailment [PRED] contradiction [COEFF] 73.7003

[P] A woman in a white shirt walks along a stone street.

[H] The woman is outside.

[LABEL] entailment [PRED] entailment [COEFF] 72.8376

[P] A man wearing a white suit holding a newspaper walking through the streets.

[H] A man is outside.

[LABEL] entailment [PRED] entailment [COEFF] 67.5732

[P] A boy in a pink t - shirt is riding a bike over a sand pile while two others are riding in the street.

[H] The boy is outside.

[LABEL] entailment [PRED] contradiction [COEFF] 66.5388

[P] An old lady walks down the street.

[H] The lady is outside.

[LABEL] contradiction [PRED] entailment [COEFF] 65.3002

[P] A little boy with a scooter riding down a sidewalk.

[H] The boy is outside.

[LABEL] entailment [PRED] contradiction [COEFF] 64.7019

[P] Young children running down a side street.

[H] The children are outside.

[LABEL] entailment [PRED] entailment [COEFF] 63.7959

[P] People are walking down a street.

[H] People are outside.

[LABEL] entailment [PRED] entailment [COEFF] 61.8315

[P] A man, in what looks like a firefighter suit, standing in the street with a large vehicles in the street.

[H] The man is outside.

[LABEL] entailment [PRED] contradiction [COEFF] 61.3824

[P] A woman is walking across the street eating a banana, while a man is following with his briefcase.

[H] The woman is outside

[LABEL] entailment [PRED] contradiction [COEFF] 61.0226

[P] A man standing on a street waiting to cross the road

[H] The man is outside.

[LABEL] entailment [PRED] entailment [COEFF] 60.2185

[P] People are walking down the street.

[H] People are outside.

[LABEL] **entailment** [PRED] **entailment** [COEFF] 58.0314

[P] A man in sunglasses is skateboarding on the road in a desert.

[H] The man is outside.

### 1.136 Component 135

[LABEL] **entailment** [PRED] **entailment** [COEFF] 11.7431

[P] A man in a red hat bending over.

[H] A man with a red hat bends over

[LABEL] **entailment** [PRED] **entailment** [COEFF] 11.1234

[P] A woman with a long ponytail standing in the street in a uniform.

[H] A woman with a ponytail standing in the street in a uniform.

[LABEL] **entailment** [PRED] **entailment** [COEFF] 10.6402

[P] A man in a white shirt cutting food with a knife.

[H] A man is cutting food with a knife while wearing a white shirt.

[LABEL] **contradiction** [PRED] **entailment** [COEFF] 9.8685

[P] A young boy is getting his haircut by a man wearing a black shirt.

[H] A man wearing a black shirt is getting his hair cut.

[LABEL] **entailment** [PRED] **entailment** [COEFF] 9.6746

[P] A man with a yellow hat and sash has his arm raised while another man stands behind him.

[H] A man in a hat

[LABEL] **entailment** [PRED] **entailment** [COEFF] 9.6319

[P] A bearded man plays guitar leaning against a white wall.

[H] A guitar playing man with a beard leans on a wall

[LABEL] **contradiction** [PRED] **entailment** [COEFF] 9.0088

[P] Toddler standing near a pole with an orange life jacket at his feet.

[H] A toddler is standing on a pole wearing a life jacket.

[LABEL] **entailment** [PRED] **entailment** [COEFF] 8.7214

[P] A man with glasses in looking up at a screen with a piece of paper in his hand.

[H] A man with a piece of paper looks at a screen through glasses.

[LABEL] **entailment** [PRED] **entailment** [COEFF] 8.7184

[P] A woman in a red coat drinking coffee.

[H] A woman wearing a red coat is drinking coffee.

[LABEL] **entailment** [PRED] **entailment** [COEFF] 8.4257

[P] A man wears a backpack.

[H] A man wears a backpack

[LABEL] entailment [PRED] entailment [COEFF] 8.3811

[P] A boy in a jacket playing.

[H] A child wearing a jacket plays.

[LABEL] entailment [PRED] entailment [COEFF] 8.3140

[P] A smiling child wearing a hat and sunglasses sits in a car.

[H] A kid has a hat on and sunglasses while in a car.

[LABEL] entailment [PRED] entailment [COEFF] 8.2809

[P] A man in a gray hoodie stares at a heavier man with spectacles and an earring.

[H] The man wears a gray hoodie.

[LABEL] entailment [PRED] entailment [COEFF] 8.1850

[P] Young boy in a blue and gray sweater, holding a wooden post.

[H] A boy in a sweater is holding a wooden post.

[LABEL] entailment [PRED] entailment [COEFF] 8.1331

[P] Man in maroon turban standing in road while people walk past

[H] A man in a turban standing in a road

[LABEL] entailment [PRED] entailment [COEFF] 8.0498

[P] Man in an orange shirt and shoes stands among boxes while holding a box in his hand.

[H] A man wearing orange is holding a box.

### 1.137 Component 136

[LABEL] entailment [PRED] entailment [COEFF] 12.3862

[P] A dirt bike rider rides across the rock.

[H] A dirt bike rider is riding.

[LABEL] entailment [PRED] entailment [COEFF] 11.6767

[P] A pitbull playing with a stick

[H] A pitbull is playing.

[LABEL] entailment [PRED] entailment [COEFF] 11.1013

[P] A snowboarder in green is balancing on a wooden bench.

[H] A snowboarder is on a bench.

[LABEL] entailment [PRED] entailment [COEFF] 11.0180

[P] A person on a mini motorbike wearing red garment and a cloth to cover her face riding along a road.

[H] A person is riding a motorbike.

[LABEL] entailment [PRED] entailment [COEFF] 9.6149

[P] A cowboy riding a horse at the rodeo.

[H] A cowboy is on a horse

[LABEL] **entailment** [PRED] **entailment** [COEFF] 9.4995

[P] A skier in a black top making a jump with a blue and white sign on pile of snow underneath.

[H] A skier is making a jump

[LABEL] **entailment** [PRED] **entailment** [COEFF] 9.4970

[P] A family is taking ride in a old style horse - drawn wagon, driven by a man in a vest and derby hat, down a tree and shrubbery lined grassy path

[H] A family is on a horse - drawn wagon down a grassy path.

[LABEL] **entailment** [PRED] **entailment** [COEFF] 9.4358

[P] A woman is riding a bicycle in her underwear with " no oil " painted on her chest.

[H] A woman rides a bike

[LABEL] **entailment** [PRED] **entailment** [COEFF] 9.2636

[P] A person jumping down a hill on skis.

[H] Someone is skiing down a hill.

[LABEL] **entailment** [PRED] **entailment** [COEFF] 9.2275

[P] A man on inline skates does a trick on a cracked concrete ramp.

[H] A man is skating.

[LABEL] **neutral** [PRED] **entailment** [COEFF] 9.0711

[P] The child playing on the deck has a red bucket on their head.

[H] A child is playing with a red bucket

[LABEL] **entailment** [PRED] **entailment** [COEFF] 9.0282

[P] A cowboy rides a bucking brown horse for a crowd of people sitting in bleachers outdoors on a sunny day.

[H] A cowboy is on a horse.

[LABEL] **entailment** [PRED] **entailment** [COEFF] 9.0134

[P] Rider wears black helmet, leather jacket and black gloves as he straddles a triumph motorcycle.

[H] A person is riding a motorcycle while wearing leather and gloves.

[LABEL] **entailment** [PRED] **entailment** [COEFF] 8.9512

[P] A mountain biker rides up a steep embankment and clears the top with great height.

[H] A biker is riding up an embankment.

[LABEL] **entailment** [PRED] **entailment** [COEFF] 8.7747

[P] Skateboarder does a trick on a ramp in front of a graffiti scene.

[H] The skateboarder performed a trick.

[LABEL] **entailment** [PRED] **entailment** [COEFF] 8.5356

[P] A street busker wearing a top hat is performing with fire in front of a large crowd, some seated and some standing.

[H] A busker performs.

### 1.138 Component 137

[LABEL] **contradiction** [PRED] **contradiction** [COEFF] 14.3386

[P] Two women talk and laugh while people walk by.

[H] Two men eating mexican food.

[LABEL] **contradiction** [PRED] **contradiction** [COEFF] 14.2540

[P] Two young girls playing in a house.

[H] Two boys ar playing soccer in the yard

[LABEL] **contradiction** [PRED] **contradiction** [COEFF] 12.6005

[P] Two women with brown hair talk.

[H] Two men playing catch

[LABEL] **contradiction** [PRED] **contradiction** [COEFF] 12.0150

[P] Group of girls having fun together.

[H] A group of guys is at the bar having a drink

[LABEL] **contradiction** [PRED] **contradiction** [COEFF] 11.7618

[P] Two women sitting at a table in a restaurant.

[H] Two men meet at a bar for a beer

[LABEL] **entailment** [PRED] **contradiction** [COEFF] 11.1481

[P] Two women are dancing in the street with vividly colored dresses.

[H] Men dancing

[LABEL] **contradiction** [PRED] **contradiction** [COEFF] 10.3971

[P] A group of girls in pink formal gowns stand in a line in front of a crowd.

[H] Young men stand in line to be granted their knighthoods.

[LABEL] **contradiction** [PRED] **contradiction** [COEFF] 10.3440

[P] Two girls are astonished at the sight of planes.

[H] The two boys were playing football.

[LABEL] **contradiction** [PRED] **contradiction** [COEFF] 10.2724

[P] Two women, one in white - rimmed sunglasses and a green skirt, the other in a longer navy skirt, converse with each other.

[H] Two men sit and drink beers

[LABEL] **contradiction** [PRED] **contradiction** [COEFF] 10.0958

[P] A crowd of women at the start of a race.

[H] A group of men cross the finish line.

[LABEL] **contradiction** [PRED] **contradiction** [COEFF] 10.0692



[P] Two little girls show off their paper plate snowmen.

[H] Two boys are causing mayhem in the supermarket

[LABEL] **contradiction** [PRED] **contradiction** [COEFF] 9.9299

[P] Two girls are walking down the sidewalk.

[H] The boys walked together to the store

[LABEL] **contradiction** [PRED] **contradiction** [COEFF] 9.6103

[P] Three girls in the picture are playing a frisbee game with one girl tossing the frisbee, another girl in front trying to intercept the frisbee, another girl standing behind her teammate, and some ladies observing in the background with an umbrella.

[H] Men playing football in a crowded stadium.

[LABEL] **contradiction** [PRED] **contradiction** [COEFF] 9.5199

[P] Two female dancers are facing each other with their arms raised to the side.

[H] Two men prepare to fight.

[LABEL] **contradiction** [PRED] **contradiction** [COEFF] 9.3461

[P] Two women in dresses stand on a street, one hold the chain to the handcuffs on the other.

[H] Two men are in chains.

[LABEL] **contradiction** [PRED] **contradiction** [COEFF] 9.2164

[P] Four women in a living room, three of which are clearly playing a musical instrument.

[H] Four men are playing instruments

### 1.139 Component 138

[LABEL] **entailment** [PRED] **entailment** [COEFF] 24.6880

[P] A young girls with a short red dress makes a phone call while holding a bright blue bag.

[H] A person making a phone call.

[LABEL] **entailment** [PRED] **entailment** [COEFF] 24.4982

[P] Two girls are crossing the street.

[H] Two people cross a street.

[LABEL] **entailment** [PRED] **entailment** [COEFF] 23.5376

[P] A girl in a black shirt is looking to the side while sitting on a wooden bench.

[H] A person is sitting on a bench.

[LABEL] **entailment** [PRED] **entailment** [COEFF] 22.8539

[P] Two girls doing a presentation

[H] Two people presenting.

[LABEL] **entailment** [PRED] **entailment** [COEFF] 21.8674

[P] Two girls share a see - through umbrella

[H] Two people use an umbrella.

[LABEL] **entailment** [PRED] **entailment** [COEFF] 21.1131  
[P] Two girls getting ready for a beauty contest hosted by the chief executive officer  
[H] Two people getting ready for a beauty contest hosted by the chief executive officer

[LABEL] **entailment** [PRED] **entailment** [COEFF] 20.1002  
[P] Two young girls walk together down a street in front of a gas station.  
[H] Two people walk down the street.

[LABEL] **entailment** [PRED] **entailment** [COEFF] 19.8049  
[P] Four girls playing soccer while the coach looks on.  
[H] Four people play soccer.

[LABEL] **entailment** [PRED] **entailment** [COEFF] 19.0190  
[P] Little girl holding flowers  
[H] A person holding something.

[LABEL] **entailment** [PRED] **entailment** [COEFF] 18.6297  
[P] An african - american woman looking into a microscope with a pictures of micro - organisms on her desk.  
[H] A person staring into a microscope.

[LABEL] **neutral** [PRED] **entailment** [COEFF] 18.6197  
[P] Two young women peer out of a darkened store window.  
[H] Two young people peer out of a darkened store window.

[LABEL] **entailment** [PRED] **entailment** [COEFF] 17.7479  
[P] A woman is juggling oranges with a happy look on her face in a suburban backyard.  
[H] A person with oranges in a yard.

[LABEL] **entailment** [PRED] **entailment** [COEFF] 17.6256  
[P] Three young women standing in front of a photo booth.  
[H] Three young people are standing by a photo booth.

[LABEL] **entailment** [PRED] **entailment** [COEFF] 17.3585  
[P] Two women in a whirlpool with towels on the heads laughing.  
[H] Two people in a whirlpool with towels on the heads laughing.

[LABEL] **neutral** [PRED] **entailment** [COEFF] 16.4144  
[P] A woman laughing and having fun at a bowling alley.  
[H] A person having fun at a bowling alley.

[LABEL] **entailment** [PRED] **entailment** [COEFF] 15.9887  
[P] A lady selling different foods on the street.  
[H] A person on the street.

## 1.140 Component 139

[LABEL] **entailment** [PRED] **entailment** [COEFF] 12.7122

[P] A group of young people are playing their musical instruments together.

[H] Several young people are playing music together.

[LABEL] **neutral** [PRED] **entailment** [COEFF] 12.1683

[P] Asians wearing green, white, and red are dancing in the street.

[H] Several asians are dancing.

[LABEL] **entailment** [PRED] **entailment** [COEFF] 9.2423

[P] Man in red t - shirt and baseball cap viewed from above, he is has a pile of posters.

[H] A man has several posters.

[LABEL] **entailment** [PRED] **entailment** [COEFF] 7.9961

[P] There is a woman, several men, and several children on a sidewalk where produce is being sold.

[H] Several people are on a sidewalk.

[LABEL] **entailment** [PRED] **entailment** [COEFF] 7.6498

[P] Five girls in swimsuits, are seen from the back, jumping into the water.

[H] A bunch of girls are in the water.

[LABEL] **entailment** [PRED] **entailment** [COEFF] 7.5962

[P] A group of people rest on a park bench underneath the shade of the canopy of trees as a man in a brightly colored pink stripe shirt walks past.

[H] Some people are resting in the shade.

[LABEL] **entailment** [PRED] **entailment** [COEFF] 7.5283

[P] Street musicians playing two guitars and drums, playing on a tiled floor.

[H] Several musicians are playing music.

[LABEL] **entailment** [PRED] **entailment** [COEFF] 7.1552

[P] A group of children playing on the street, some on bicycles, and one on a scooter, and one in a blue shirt walking.

[H] There are some people doing various activities.

[LABEL] **entailment** [PRED] **entailment** [COEFF] 7.1493

[P] A group of people with numbered signs walking on a road.

[H] There are several people walking on a road.

[LABEL] **entailment** [PRED] **entailment** [COEFF] 7.0055

[P] Several women are gather around a table in a corner surrounded by bookshelves.

[H] Several women are near a table.

[LABEL] **entailment** [PRED] **entailment** [COEFF] 6.7147

[P] People are bustling about on a crowded cobblestone road.

[H] A large number of people are on a street.

[LABEL] **entailment** [PRED] **entailment** [COEFF] 6.4895

[P] A man and woman walking past a record shop

[H] People are near a record shop

[LABEL] **entailment** [PRED] **entailment** [COEFF] 6.4097

[P] A marketplace selling many different items.

[H] Different items are sold at the marketplace.

[LABEL] **entailment** [PRED] **entailment** [COEFF] 6.3317

[P] A lot of people are on the street holding balloons.

[H] More than one person is holding a balloon.

[LABEL] **entailment** [PRED] **entailment** [COEFF] 6.1938

[P] Two men in light colored shirts and dark pants sit on a balcony conversing as a lone car passes below.

[H] Two men are sitting and talking.

[LABEL] **entailment** [PRED] **entailment** [COEFF] 6.0468

[P] A large crowd of people are outside relaxing in the courtyard.

[H] A group of people hang out in the courtyard.

## 1.141 Component 140

[LABEL] **contradiction** [PRED] **contradiction** [COEFF] 28.9217

[P] A boy in a red shirt is sitting on the shoulders of a man in a crowd.

[H] The boy in a blue shirt

[LABEL] **contradiction** [PRED] **contradiction** [COEFF] 25.9583

[P] A man wearing a red shirt holds a camera.

[H] A man in a blue shirt holds a camera.

[LABEL] **contradiction** [PRED] **contradiction** [COEFF] 23.5804

[P] A man in a red apron displays a gourmet plated entree.

[H] The man has a green apron.

[LABEL] **contradiction** [PRED] **contradiction** [COEFF] 23.3925

[P] Men in red caps stand in an audience of some sort amid costumed figures.

[H] The men are wearing blue caps

[LABEL] **contradiction** [PRED] **contradiction** [COEFF] 23.3706

[P] A man with a red hat is playing the drums.

[H] A man playing the drums wore a blue hat.

[LABEL] **contradiction** [PRED] **contradiction** [COEFF] 22.7600

[P] A woman with a red bag is hiding her face with an umbrella

[H] A woman is carrying a blue bag

[LABEL] **contradiction** [PRED] **contradiction** [COEFF] 22.5706  
[P] Two girls wearing red jerseys, each with long light brown hair, sit in the stands.  
[H] Two girls are wearing blue jerseys

[LABEL] **contradiction** [PRED] **contradiction** [COEFF] 21.4523  
[P] A person in a red jacket is getting across the street while others are walking.  
[H] Someone wears a blue jacket

[LABEL] **contradiction** [PRED] **contradiction** [COEFF] 20.9603  
[P] A woman in a red jacket looking at boxes that are on the ground.  
[H] The woman has on a blue jacket.

[LABEL] **contradiction** [PRED] **contradiction** [COEFF] 20.5910  
[P] A group of people wearing red shirts and holding drums is being photographed at the boardwalk.  
[H] People are wearing blue shirts and eating drums sticks.

[LABEL] **contradiction** [PRED] **contradiction** [COEFF] 20.2755  
[P] Man in a red shirt making a formal presentation.  
[H] Man in blue shirt is speaking.

[LABEL] **contradiction** [PRED] **contradiction** [COEFF] 20.1736  
[P] A child in a red coat is touching a statue of a dinosaur in front of a building.  
[H] The boy is wearing a green coat.

[LABEL] **contradiction** [PRED] **contradiction** [COEFF] 19.7081  
[P] The man with the red shirt is holding a basketball and is in front of a basketball hoop.  
[H] The man holding the basketball is wearing a green shirt.

[LABEL] **contradiction** [PRED] **contradiction** [COEFF] 18.8099  
[P] A man wearing a red cap is leaning on wooden railing.  
[H] A man wears a blue hat.

[LABEL] **neutral** [PRED] **contradiction** [COEFF] 18.5508  
[P] A little girl in a red shirt and jeans climbs a small tree while another little girl looks on.  
[H] A girl in a blue shirt watches another girl climb a tree.

[LABEL] **contradiction** [PRED] **contradiction** [COEFF] 17.9997  
[P] A woman in a red coat is leaving a photo shop.  
[H] A woman in a green coat is leaving the grocery store.

## 1.142 Component 141

[LABEL] **neutral** [PRED] **neutral** [COEFF] 18.4147  
[P] A man holding a screwdriver and wearing a t - shirt and baseball cap sits on the ground with a young boy looking at a outdoor grill.  
[H] The man is trying to fix the grill.

[LABEL] **neutral**            [PRED] **neutral**            [COEFF] 16.8000  
[P] This is a scene of several people walking outside during the day, including a woman with two coffee urns.  
[H] People are trying to reach their destinations while walking.

[LABEL] **neutral**            [PRED] **neutral**            [COEFF] 15.7196  
[P] Four kayakers on a mountain stream.  
[H] They are preparing for a kayak race.

[LABEL] **neutral**            [PRED] **neutral**            [COEFF] 14.6830  
[P] A young, backwards hat wearing, boy holding a professional camera.  
[H] A boy is getting ready to take a picture.

[LABEL] **neutral**            [PRED] **neutral**            [COEFF] 14.4913  
[P] A gray and black - haired male is holding his glasses in one hand while looking at something in the other hand ; surrounded by numerous amounts of machines.  
[H] The man is trying to find out what is wrong with his machines.

[LABEL] **neutral**            [PRED] **neutral**            [COEFF] 14.4041  
[P] A group of people in mostly casual dress meet at an l - shaped table with laptops and notebooks.  
[H] A group of people are about to work on a project

[LABEL] **entailment**        [PRED] **neutral**            [COEFF] 14.0154  
[P] A man holding a sign with people walking around in the background.  
[H] The man holding the sign is trying to tell people something.

[LABEL] **neutral**            [PRED] **neutral**            [COEFF] 13.3927  
[P] A woman in a flower pattern shirt standing in a convenience store - like stand  
[H] The woman is waiting to buy something.

[LABEL] **neutral**            [PRED] **neutral**            [COEFF] 13.3464  
[P] A lone hiker proceeds along a trail outdoors in the daytime, on a cobblestone path leading to a stone staircase going up the hillside.  
[H] The hiker is searching for a scenic spot.

[LABEL] **neutral**            [PRED] **neutral**            [COEFF] 13.1002  
[P] A woman with long hair is holding a yoga mat.  
[H] The female is preparing to do some yoga exercises.

[LABEL] **neutral**            [PRED] **neutral**            [COEFF] 13.0102  
[P] A brunette woman wearing tennis shoes sitting on steps.  
[H] The woman is waiting for someone.

[LABEL] **neutral**            [PRED] **neutral**            [COEFF] 12.6082  
[P] A man in the street with an upside down bike standing outside the back of a car with the hatch open.  
[H] The man is about to put the bike into the car.

[LABEL] entailment [PRED] neutral [COEFF] 12.3518

[P] Football players in the middle of a game.

[H] The players are trying to score points.

[LABEL] neutral [PRED] neutral [COEFF] 12.2328

[P] Two light - colored female goats in an indoor arena with handlers dressed in white.

[H] The handlers are trying to train the goats.

[LABEL] neutral [PRED] neutral [COEFF] 11.9935

[P] A man stands among cement fixtures in front of a donut shop.

[H] The man is going to buy donuts.

[LABEL] neutral [PRED] neutral [COEFF] 11.8432

[P] Man in black shirt standing in the water.

[H] He is getting ready to swim.

### 1.143 Component 142

[LABEL] entailment [PRED] entailment [COEFF] 8.0945

[P] A bicycle cop or security guard is riding in front of an outback steakhouse.

[H] A cop or guard is at a outback steakhouse.

[LABEL] entailment [PRED] entailment [COEFF] 7.6460

[P] Men with camels gather on a beach.

[H] Men with camels are on a beach.

[LABEL] entailment [PRED] entailment [COEFF] 7.5555

[P] A young girl in an orange bathing suit plays on the beach's shore.

[H] A young girl at the beach.

[LABEL] entailment [PRED] entailment [COEFF] 7.4880

[P] A young girl whips her hair over her head in a public pool

[H] A girl is in a public pool.

[LABEL] entailment [PRED] entailment [COEFF] 7.3579

[P] An elderly woman with a cane is walking down the street.

[H] An old woman is in a street.

[LABEL] entailment [PRED] entailment [COEFF] 7.0305

[P] A girl is sitting on the beach and appears to be approaching a hit on the head by a plastic inflated hammer.

[H] A girl is at the beach.

[LABEL] entailment [PRED] entailment [COEFF] 6.8634

[P] A female in a store leaning on groceries.

[H] A female is in the store.

[LABEL] **entailment** [PRED] **entailment** [COEFF] 6.8432  
[P] A group of people are looking at different books in a library.  
[H] A group of people in the library.

[LABEL] **entailment** [PRED] **entailment** [COEFF] 6.8070  
[P] A crowd of adults in a park setting is celebrating.  
[H] A crowd is in the park.

[LABEL] **neutral** [PRED] **entailment** [COEFF] 6.7344  
[P] A person in a hard hat is doing some work on a train track.  
[H] A being with a hat is on the train tracks

[LABEL] **neutral** [PRED] **entailment** [COEFF] 6.7189  
[P] Group of people walking down street, one making a face.  
[H] A group of people are on the street.

[LABEL] **entailment** [PRED] **entailment** [COEFF] 6.6721  
[P] A dog in a grassy field, looking up.  
[H] A dog is in a field.

[LABEL] **entailment** [PRED] **entailment** [COEFF] 6.6377  
[P] A child in a red and white jacket running in the desert.  
[H] A child is in the desert.

[LABEL] **entailment** [PRED] **entailment** [COEFF] 6.6313  
[P] A man is smiling with one hand on his forehead at a crowded bar.  
[H] A man is at the bar.

[LABEL] **entailment** [PRED] **entailment** [COEFF] 6.5212  
[P] Couple being married in a church.  
[H] The couple are in a church

[LABEL] **entailment** [PRED] **entailment** [COEFF] 6.4435  
[P] A woman is selecting fresh foods from an outdoor market.  
[H] A woman is a at an outdoor market.

### 1.144 Component 143

[LABEL] **entailment** [PRED] **contradiction** [COEFF] 50.9923  
[P] Two priests stand on some stairs in front of a building.  
[H] Two priests are outside.

[LABEL] **entailment** [PRED] **contradiction** [COEFF] 50.8930  
[P] The dog is in front of some bushes.  
[H] Dogs are outside.



[LABEL] entailment [PRED] contradiction [COEFF] 46.9411  
[P] A woman is walking in front of a brick wall on a sunny day.  
[H] A woman is outside

[LABEL] entailment [PRED] contradiction [COEFF] 39.1501  
[P] Some men are playing cricket in front of a white building.  
[H] The men are playing cricket outside.

[LABEL] entailment [PRED] contradiction [COEFF] 36.7234  
[P] A man in a green vest is standing in front of water.  
[H] The man is outside, near the water.

[LABEL] entailment [PRED] contradiction [COEFF] 36.3517  
[P] Several soldiers dressed in green camouflaged uniforms are standing in front of a building.  
[H] A group of soldiers standing outside a building.

[LABEL] entailment [PRED] contradiction [COEFF] 35.4959  
[P] Two men having a conversation in front of a large city background.  
[H] The two people are talking outside.

[LABEL] entailment [PRED] contradiction [COEFF] 34.4352  
[P] A man walks down the street in front of a building with large windows, with a reflection from a car below.  
[H] The man is outside.

[LABEL] entailment [PRED] contradiction [COEFF] 34.3429  
[P] Three boys in sports casual clothing are posing in front of a blue building  
[H] The boys are posing outside.

[LABEL] entailment [PRED] contradiction [COEFF] 34.1446  
[P] A man skateboards in front of a graffiti painted wall.  
[H] A skateboarder outside.

[LABEL] entailment [PRED] contradiction [COEFF] 32.7269  
[P] A man holding a book stands in front of a wall crowded with objects and pictures.  
[H] The man is outside holding things.

[LABEL] entailment [PRED] contradiction [COEFF] 32.1019  
[P] A woman in a 'devil' outfit standing in front of a fountain.  
[H] The woman is outside.

[LABEL] entailment [PRED] contradiction [COEFF] 31.9029  
[P] A dog and a ball on green grass and in front of trees.  
[H] A dog and a ball outside.

[LABEL] entailment [PRED] contradiction [COEFF] 31.3798

[P] A woman and man with bikes stand by a man with a guitar in front of a large building with a balcony.  
[H] A woman and man are outside of a building with a man with a guitar player.

[LABEL] **entailment** [PRED] **contradiction** [COEFF] 30.0566

[P] A bride and groom stand in front of a brick building with others.  
[H] A married couple are outside

[LABEL] **entailment** [PRED] **contradiction** [COEFF] 29.7980

[P] Blue tractor digging in front of a building with a mural of a man laying down with no clothes on.  
[H] A tractor is outside.

### 1.145 Component 144

[LABEL] **contradiction** [PRED] **contradiction** [COEFF] 15.9696

[P] A brunette woman in a brown sweater is looking at the camera through heavily lidded eyes while a man in a black cap and glasses behind her rests his forehead in his hand and looks down at a table in front of wrestling posters.  
[H] The man and woman are dancing.

[LABEL] **contradiction** [PRED] **contradiction** [COEFF] 14.3215

[P] Two dark - haired people are seated on a bench reading magazines, and looking around.  
[H] Two people are dancing

[LABEL] **contradiction** [PRED] **contradiction** [COEFF] 13.1112

[P] Three women, all holding maroon folders and wearing white shirts and black pants are singing in a choir.  
[H] The women are dancing.

[LABEL] **contradiction** [PRED] **contradiction** [COEFF] 12.6865

[P] A little girl in a striped bathing suit jumps in the ocean.  
[H] The girl is dancing

[LABEL] **contradiction** [PRED] **contradiction** [COEFF] 12.6218

[P] Women wearing blue baseball cap up in the bleachers eating a garden salad.  
[H] The women are dancing.

[LABEL] **contradiction** [PRED] **contradiction** [COEFF] 12.5428

[P] Two men sitting on chairs and talking.  
[H] Two men are dancing.

[LABEL] **contradiction** [PRED] **contradiction** [COEFF] 12.5228

[P] A person is walking in the ocean waves.  
[H] A woman is dancing with her child.

[LABEL] **contradiction** [PRED] **contradiction** [COEFF] 11.4560

[P] Two mechanics examining the engine of a stock car with the body raised.  
[H] Two men are dancing.

[LABEL] contradiction [PRED] contradiction [COEFF] 11.3459

[P] A man walking down the street with his hands in his pocket, and an elderly woman stands near a staircase with her hand on her purse.

[H] A woman dances with her friend in the parade.

[LABEL] contradiction [PRED] contradiction [COEFF] 11.3363

[P] A young boy wearing a red winter coat is eating and holding up a candy bar.

[H] Young boy dancing in celebration

[LABEL] contradiction [PRED] contradiction [COEFF] 10.3592

[P] Three people sitting at a round table are looking at another man pointing at something written on the wall.

[H] The man is dancing on the table.

[LABEL] contradiction [PRED] contradiction [COEFF] 10.3376

[P] A line of customers at a deli.

[H] A group of people dancing.

[LABEL] contradiction [PRED] contradiction [COEFF] 10.3251

[P] Two people are cleaning the road.

[H] Two young people are dancing on the road.

[LABEL] contradiction [PRED] contradiction [COEFF] 10.2579

[P] Two people are riding their bikes on a country road as the sun is rising.

[H] Two people are dancing in the street

[LABEL] contradiction [PRED] contradiction [COEFF] 10.2233

[P] Young woman in suit sitting on white bench

[H] A woman is dancing on a bench.

[LABEL] contradiction [PRED] contradiction [COEFF] 10.1786

[P] Four men and a woman having a discussion around a table.

[H] Five people are dancing.

## 1.146 Component 145

[LABEL] contradiction [PRED] contradiction [COEFF] 38.0318

[P] A child smiles happily as he holds onto a metal bar.

[H] The child is crying

[LABEL] contradiction [PRED] contradiction [COEFF] 37.8618

[P] A child is smiling whilst he is has his hands clasped in front of him.

[H] The child is crying.

[LABEL] contradiction [PRED] contradiction [COEFF] 33.6471

[P] A smiling young woman in a red t - shirt, sitting on a stool playing a guitar in a room with guitars

on the wall.

[H] The woman is crying.

[LABEL] contradiction [PRED] contradiction [COEFF] 32.8909

[P] A little girl giggles and smiles happily as she kneels on her bed.

[H] A girl is crying.

[LABEL] contradiction [PRED] contradiction [COEFF] 31.3866

[P] Toddler boy smiling while in a swing

[H] The toddler in the swing is crying.

[LABEL] contradiction [PRED] contradiction [COEFF] 29.2089

[P] A group of boys in the mountains smile and make peace signs for the camera.

[H] A group of boys are crying in the mountains.

[LABEL] contradiction [PRED] contradiction [COEFF] 29.1661

[P] A young boy smiling with people looking in his direction and a bottle to his left

[H] The boy is crying while the people try to comfort him.

[LABEL] contradiction [PRED] contradiction [COEFF] 25.1987

[P] A young boy smiling runs past a gun toting soldier in the background.

[H] A boy is crying in a chair.

[LABEL] contradiction [PRED] contradiction [COEFF] 22.7421

[P] A small girl giggling while playing on a toy.

[H] A baby crying.

[LABEL] contradiction [PRED] contradiction [COEFF] 22.7145

[P] A lady in a kimono laughing.

[H] A lady is crying.

[LABEL] contradiction [PRED] contradiction [COEFF] 21.7074

[P] A baby in a pink with brown stripe bodysuit smiling.

[H] The baby is screaming.

[LABEL] contradiction [PRED] contradiction [COEFF] 20.5336

[P] People are gathered outside for a protest, and one woman in the front is smiling at the camera.

[H] The woman was crying and the people were consoling her

[LABEL] contradiction [PRED] contradiction [COEFF] 18.5698

[P] A smiling baby feeding a colorful treat to its parent.

[H] A crying baby feeding a colorful treat to its parent.

[LABEL] contradiction [PRED] contradiction [COEFF] 18.3922

[P] Woman with green sweater and sunglasses smiling

[H] A woman with blue sweater is crying.

[LABEL] contradiction [PRED] contradiction [COEFF] 17.7079

[P] Happy children rocking out and smiling.

[H] Children crying.

[LABEL] contradiction [PRED] contradiction [COEFF] 16.3900

[P] A smiling man with a beard holds up a poster showing an abstract elephant cartoon painted in horizontal rainbow stripes.

[H] The man with a beard is shouting.

## 1.147 Component 146

[LABEL] entailment [PRED] contradiction [COEFF] 66.2991

[P] A man in a blue shirt plays an arcade game right in the middle of a supermarket.

[H] A human playing

[LABEL] entailment [PRED] contradiction [COEFF] 63.5171

[P] A man with a backpack is eating an ice cream cone.

[H] A human eating

[LABEL] entailment [PRED] contradiction [COEFF] 61.9065

[P] A man is working sitting in front of many computer.

[H] A human sitting

[LABEL] entailment [PRED] contradiction [COEFF] 60.1331

[P] A man wearing white glasses talking on a cellphone.

[H] A human talking.

[LABEL] entailment [PRED] contradiction [COEFF] 58.9279

[P] A man in a red t - shirt is sitting in a car looking at a map.

[H] A human is sitting.

[LABEL] entailment [PRED] contradiction [COEFF] 57.3299

[P] A man is sitting on a sunny street in a lawn chair.

[H] A human sitting

[LABEL] entailment [PRED] contradiction [COEFF] 56.0217

[P] A man stands outside his home by some yellow boxes.

[H] A human standing

[LABEL] entailment [PRED] contradiction [COEFF] 55.0398

[P] A bearded man wearing glasses and a jersey is drumming at a trap set.

[H] A human drumming.

[LABEL] entailment [PRED] entailment [COEFF] 53.4589

[P] A man in a white shirt is fixing the tire of a crimson bike.

[H] A human fixing

[LABEL] entailment [PRED] contradiction [COEFF] 53.0709

[P] A man is moving a cart with goods inside.

[H] A human moving a cart

[LABEL] entailment [PRED] contradiction [COEFF] 52.5156

[P] A man sits on the sidewalk reading while wearing brown loafers.

[H] A human outside

[LABEL] entailment [PRED] contradiction [COEFF] 52.2103

[P] A man dressed in black plays a long instrument with others in an orchestra.

[H] A human in an orchestra

[LABEL] entailment [PRED] contradiction [COEFF] 52.0748

[P] A man plays guitar for a girl in the hospital.

[H] A human playing guitar.

[LABEL] entailment [PRED] contradiction [COEFF] 49.9081

[P] A man in a superman costume is holding a sign, on the side of the road.

[H] A human holding a sign.

[LABEL] entailment [PRED] contradiction [COEFF] 49.1648

[P] A man in a green shirt holds a rolling pin while smoking a cigarette in a cluttered kitchen.

[H] A human with clothes.

[LABEL] entailment [PRED] entailment [COEFF] 49.0018

[P] A man in an orange shirt is laying curled up on a concrete ledge behind a pole.

[H] A human is curled up on the concrete.

## 1.148 Component 147

[LABEL] contradiction [PRED] contradiction [COEFF] 16.7769

[P] A little toddler in blue pants is crawling on the road.

[H] A large child in a pink dress is running on the sidewalk.

[LABEL] contradiction [PRED] contradiction [COEFF] 16.7533

[P] A young woman stands outside in the snow, wearing a jacket and a backpack, standing in snowshoes, while her black dog faces away from the camera.

[H] The woman and her dog are enjoying the summer day.

[LABEL] contradiction [PRED] contradiction [COEFF] 16.6919

[P] Cute black doing playing in snow.

[H] The weather is very warm.

[LABEL] contradiction [PRED] contradiction [COEFF] 16.4248

[P] The boy in swim trunks is laying face down on a watery pavement.

[H] The boy is swimming happily in the pool

[LABEL] **contradiction** [PRED] **contradiction** [COEFF] 16.0859  
[P] A view through a door into a small tiled room where a man and two children are asleep on the floor.  
[H] A man and two children are playing frisbee in the park.

[LABEL] **neutral** [PRED] **contradiction** [COEFF] 14.5586  
[P] The smiling woman at the beach is buried in seaweed.  
[H] It's a warm, sunny day.

[LABEL] **contradiction** [PRED] **contradiction** [COEFF] 14.5362  
[P] Small black dog biting the fingers of a woman.  
[H] The dog is eating ice cream.

[LABEL] **contradiction** [PRED] **contradiction** [COEFF] 14.4310  
[P] Two men, one with a beard, red t - shirt, and black pants and the other one in a gray t - shirt and black pants, appear to be fighting.  
[H] Two friends embrace each other in celebration.

[LABEL] **contradiction** [PRED] **contradiction** [COEFF] 14.1769  
[P] A man sitting on the ground is playfully kicked by a young woman, while a man in the back observes.  
[H] A man and a women are at the chapel, getting married as a man looks with joy.

[LABEL] **contradiction** [PRED] **contradiction** [COEFF] 13.7984  
[P] A man in a bandana and a dirty t - shirt, and a woman in a graphic t - shirt, are standing next to a oblong hole with smoke coming out.  
[H] The two people are dancing at the ball.

[LABEL] **contradiction** [PRED] **contradiction** [COEFF] 13.4194  
[P] A woman in blue bends over backwards on the street.  
[H] A woman is dancing.

[LABEL] **contradiction** [PRED] **contradiction** [COEFF] 13.2879  
[P] A dog shakes dry.  
[H] The dog is eating a treat.

[LABEL] **contradiction** [PRED] **contradiction** [COEFF] 13.1944  
[P] Raining outside and three black umbrellas and one yellow and pink umbrella.  
[H] The weather in the shot is sunny and bright.

[LABEL] **neutral** [PRED] **contradiction** [COEFF] 12.7609  
[P] A dog lying on its back in the sand.  
[H] A dog is playing at the beach.

[LABEL] **neutral** [PRED] **contradiction** [COEFF] 12.7036  
[P] A man is sitting at a table pointing while two females look at him.  
[H] A man calls over his two female co - workers to join him.

[LABEL] **contradiction** [PRED] **contradiction** [COEFF] 12.6906

[P] A man in jeans and a black t - shirt standing precariously at the top of a ladder and reaching up to paint the walls.

[H] The man is tap dancing on broadway

### 1.149 Component 148

[LABEL] **neutral** [PRED] **neutral** [COEFF] 14.5835

[P] People stand on the balcony and deck of a boat.

[H] The people are women

[LABEL] **neutral** [PRED] **neutral** [COEFF] 14.4622

[P] The cook enjoys some downtime with a coworker.

[H] The coworker is wearing an apron.

[LABEL] **neutral** [PRED] **neutral** [COEFF] 13.6042

[P] Some laborers in smocks sort some rubbish while diverting their eyes.

[H] The laborers are men

[LABEL] **neutral** [PRED] **neutral** [COEFF] 13.0279

[P] Skier jumping off the edge of a snowy cliff.

[H] The skier is female.

[LABEL] **neutral** [PRED] **neutral** [COEFF] 12.8140

[P] A group of greyhound dogs racing with muzzles covering their noses.

[H] The dogs are both male and female

[LABEL] **neutral** [PRED] **neutral** [COEFF] 12.2317

[P] Two pipe - fitters weld a seam joining a large coupling.

[H] The pipe - fitters are men

[LABEL] **neutral** [PRED] **neutral** [COEFF] 12.1474

[P] A small black and white dog jumps with red plastic fence in background.

[H] The dogs belong to the same owner.

[LABEL] **neutral** [PRED] **neutral** [COEFF] 11.7538

[P] Two mechanics are working on train tracks with machinery.

[H] The two mechanics are men.

[LABEL] **neutral** [PRED] **neutral** [COEFF] 11.7479

[P] A crowd of people are running in a race.

[H] They are professional runners

[LABEL] **neutral** [PRED] **neutral** [COEFF] 11.6957

[P] Two men stand in a lift near some power lines.

[H] The men work for the power company.



[LABEL] **neutral** [PRED] **neutral** [COEFF] 11.6669  
[P] Three children are playing with a yellow toy on a green pillow.  
[H] The children are siblings

[LABEL] **neutral** [PRED] **neutral** [COEFF] 11.6165  
[P] A japanese swordsman jumps into the air.  
[H] The swordsman is holding a weapon in his right hand.

[LABEL] **neutral** [PRED] **neutral** [COEFF] 11.2423  
[P] Two men on a produce cart driven by a horse.  
[H] The produce is fresh

[LABEL] **neutral** [PRED] **neutral** [COEFF] 10.8676  
[P] Four diners sitting at a restaurant table finish up their meals.  
[H] The diners are male.

[LABEL] **neutral** [PRED] **neutral** [COEFF] 10.5829  
[P] A man and a small girl in a pink shirt are sitting on a bench in a park.  
[H] They are family

[LABEL] **neutral** [PRED] **neutral** [COEFF] 10.0980  
[P] A woman weaves yarn as a child watches on in the background.  
[H] The child is the woman's grandchild.

## 1.150 Component 149

[LABEL] **contradiction** [PRED] **contradiction** [COEFF] 34.2782  
[P] A little boy in a blue coat is climbing into a red play truck.  
[H] The boy is running in the street.

[LABEL] **contradiction** [PRED] **contradiction** [COEFF] 31.6639  
[P] A young girl wearing a pink floral outfit walks down the sidewalk.  
[H] A young girl is running

[LABEL] **contradiction** [PRED] **contradiction** [COEFF] 30.6170  
[P] A young child in pink pants is watching as a man in a blue shirts walk down a trail.  
[H] A man is running to the child

[LABEL] **neutral** [PRED] **contradiction** [COEFF] 28.5754  
[P] A smiling asian woman wearing a conical hat sits on a sidewalk hawking her bananas.  
[H] A woman is yelling to bring attention to the bananas she is selling.

[LABEL] **contradiction** [PRED] **contradiction** [COEFF] 27.7434  
[P] People in a horse driven red carriage in a city near a parked car.  
[H] The people are running together.

[LABEL] **neutral** [PRED] **neutral** [COEFF] 27.6094  
[P] A black and white dog is playing with a ball on a lawn.  
[H] The pets are running around

[LABEL] **neutral** [PRED] **neutral** [COEFF] 27.5467  
[P] Two young girls are playing and laughing in a green grassy yard.  
[H] Two young girls are running around in the grass

[LABEL] **contradiction** [PRED] **contradiction** [COEFF] 26.8107  
[P] A dog stands on his hind legs while another dog looks on.  
[H] The dog is jumping

[LABEL] **contradiction** [PRED] **contradiction** [COEFF] 26.5338  
[P] A woman in a red shirt laughing while leaning on a kitchen counter.  
[H] A woman is yelling.

[LABEL] **contradiction** [PRED] **contradiction** [COEFF] 24.4128  
[P] Two ladies walk down a street wearing black lingerie and green skirts with garter belts.  
[H] Ladies are running down the street.

[LABEL] **contradiction** [PRED] **neutral** [COEFF] 24.0895  
[P] The man is carrying a young girl with pigtails on his shoulders.  
[H] The man and the girl are running alongside each other.

[LABEL] **contradiction** [PRED] **neutral** [COEFF] 23.8690  
[P] A caucasian woman, wearing a black and orange dress, is standing in front of a music stand.  
[H] The woman is running to her stand

[LABEL] **neutral** [PRED] **contradiction** [COEFF] 23.3741  
[P] Young boy plays outdoors in the leaves.  
[H] A boy jumping into a leaf pile.

[LABEL] **neutral** [PRED] **neutral** [COEFF] 23.0891  
[P] Two white dogs play in the grass.  
[H] A pair of dogs are running to catch a ball.

[LABEL] **neutral** [PRED] **neutral** [COEFF] 22.9636  
[P] A man wearing a white shirt crossing a bridge in front of a stucco colored building.  
[H] The man is running across the bridge.

[LABEL] **contradiction** [PRED] **contradiction** [COEFF] 22.9548  
[P] A man in striped shirt standing in front of, and working on, audio equipment.  
[H] A man is running up and down the stairs.

## 1.151 Component 150

[LABEL] **contradiction** [PRED] **contradiction** [COEFF] 32.6284

[P] A woman giving a cup to an african american man.

[H] A woman not giving a cup

[LABEL] **contradiction** [PRED] **contradiction** [COEFF] 29.7271

[P] A person playing with their black dog in the grass.

[H] The person isn't playing with their dog

[LABEL] **contradiction** [PRED] **contradiction** [COEFF] 29.5828

[P] A peloton of bicyclists riding down a road of tightly packed together houses.

[H] A peloton of bicyclists not riding down a road

[LABEL] **contradiction** [PRED] **contradiction** [COEFF] 28.8607

[P] Two boys at play at a fun center, there are two women in the background laughing.

[H] Women in the background are not laughing

[LABEL] **contradiction** [PRED] **contradiction** [COEFF] 26.8282

[P] A woman with brown hair wearing sunglasses and a white floral headband stands in front of a microphone while a man in the background holds maracas and plays a drum set.

[H] The woman is not wearing sunglasses

[LABEL] **contradiction** [PRED] **contradiction** [COEFF] 25.2918

[P] A baseball player wearing a white and red uniform is readying himself to bat during an evening baseball game.

[H] A baseball player not wearing a white and red uniform

[LABEL] **contradiction** [PRED] **contradiction** [COEFF] 23.5600

[P] This men performs in front of people while dancing and having mask on face.

[H] The men don't have masks

[LABEL] **contradiction** [PRED] **contradiction** [COEFF] 23.5414

[P] A lot of furniture stacked on top of each other.

[H] A lot of furniture not stacked

[LABEL] **contradiction** [PRED] **contradiction** [COEFF] 22.8998

[P] A woman wearing a scarf is talking to a man wearing glasses.

[H] A woman is not wearing a scarf.

[LABEL] **contradiction** [PRED] **contradiction** [COEFF] 22.8574

[P] The feet of a skier with one boot coming out of the ski and casting a shadow.

[H] The skier is not casting a shadow.

[LABEL] **contradiction** [PRED] **contradiction** [COEFF] 22.6073

[P] Many people sit a table clothed tables eating food and making conversation.

[H] Many people not eating food

[LABEL] contradiction [PRED] contradiction [COEFF] 22.3772

[P] Young boys, in a classroom, working.

[H] The boys are not working

[LABEL] contradiction [PRED] contradiction [COEFF] 20.7891

[P] Little boy in a yellow jacket

[H] A boy is not wearing a yellow jacket.

[LABEL] contradiction [PRED] contradiction [COEFF] 19.5634

[P] A person wearing a pink hat and pink swimwear bottoms is face - down on a smooth brown beach.

[H] A person not wearing a pink hat and pink swimwear

[LABEL] contradiction [PRED] contradiction [COEFF] 19.3351

[P] Two people wearing jeans huddle near a wooden door, sheilding their faces from the camera.

[H] The people aren't wearing jeans

[LABEL] contradiction [PRED] contradiction [COEFF] 19.2738

[P] A girl with a toboggan and sunglasses smiles with her friend in the background as they do crafts.

[H] The girl with the toboggan is not wearing sunglasses.

## 1.152 Component 151

[LABEL] contradiction [PRED] contradiction [COEFF] 25.1149

[P] 2 kids soccer teams playing with coach in the background watching.

[H] The teams are sitting down.

[LABEL] contradiction [PRED] contradiction [COEFF] 24.4087

[P] Three boys grab onto an inflatable donut in the water.

[H] The three boys are sitting on the beach.

[LABEL] contradiction [PRED] contradiction [COEFF] 23.3922

[P] These girls are in uniforms and are playing field hockey.

[H] The girls are sitting on a park bench.

[LABEL] contradiction [PRED] contradiction [COEFF] 22.6267

[P] Parents get involved in the outdoor musical festivities by helping children play hand drums.

[H] The parents are sitting watching their children play on the playground.

[LABEL] contradiction [PRED] contradiction [COEFF] 22.2258

[P] A little boy playing in the pool giving a thumbs up.

[H] The boy is standing on the deck.

[LABEL] neutral [PRED] contradiction [COEFF] 21.3838

[P] A group of children holding hands in a circle.

[H] Children are sitting down.

[LABEL] **neutral** [PRED] **contradiction** [COEFF] 21.0501  
[P] Two soldiers wearing camouflage are getting food from a woman in white as two people in white stand behind a counter watching.  
[H] The soldiers are sitting at the counter.

[LABEL] **contradiction** [PRED] **contradiction** [COEFF] 20.4661  
[P] Two men in black clothes with blue and red bowties are performing in front of a crowd.  
[H] The two people are sitting in a chair

[LABEL] **contradiction** [PRED] **contradiction** [COEFF] 19.9820  
[P] The little girl wearing blue jeans and a pink shirt is practicing hopping for the camera.  
[H] The girl is sitting in the corner.

[LABEL] **contradiction** [PRED] **contradiction** [COEFF] 18.6852  
[P] Three men stand together in a circle holding instruments while being covered in a red light.  
[H] The men are sitting down in chairs and holding their tubas.

[LABEL] **neutral** [PRED] **contradiction** [COEFF] 18.6094  
[P] A young boy with a red shirt surfing on a black surfboard.  
[H] The boy is laying down on the board

[LABEL] **neutral** [PRED] **contradiction** [COEFF] 18.4714  
[P] People watch a musician play the guitar.  
[H] A musician is standing before an audience.

[LABEL] **neutral** [PRED] **contradiction** [COEFF] 18.4601  
[P] A little boy kisses a little girl on the side of the road.  
[H] The childrens are standing on the side of the road

[LABEL] **entailment** [PRED] **contradiction** [COEFF] 18.3435  
[P] A baseball player prepares to hit the ball.  
[H] The baseball player is standing.

[LABEL] **entailment** [PRED] **contradiction** [COEFF] 17.7058  
[P] A man smiling as he is driving a large truck.  
[H] A man is sitting in the truck.

[LABEL] **contradiction** [PRED] **contradiction** [COEFF] 17.6056  
[P] A man stands between two windows, one of which advertises " liquors " in front of an american flag.  
[H] The man is sitting on the bench.

### 1.153 Component 152

[LABEL] **contradiction** [PRED] **contradiction** [COEFF] 14.3696  
[P] A girl holds a glass and has a girl on her right and a boy on her left looking into the camera.  
[H] The girl is asleep in her bed.

[LABEL] contradiction [PRED] contradiction [COEFF] 13.5596

[P] An older woman with a cane is walking with a sign around her neck.

[H] The woman is asleep in her bed.

[LABEL] contradiction [PRED] contradiction [COEFF] 13.4103

[P] A woman is walking in the street, talking on a cellphone.

[H] The woman is asleep in her bed.

[LABEL] contradiction [PRED] contradiction [COEFF] 13.1753

[P] Doberman leaping through the water.

[H] The doberman is asleep

[LABEL] contradiction [PRED] contradiction [COEFF] 13.0769

[P] A young smiling child holds his toy alligator up to the camera.

[H] The child is asleep in his cubicle

[LABEL] contradiction [PRED] contradiction [COEFF] 12.3315

[P] There is a lady in a dress walking across a busy street beside of a taxi.

[H] A lady is asleep in her bed

[LABEL] contradiction [PRED] contradiction [COEFF] 11.8024

[P] A young woman engages in conversation on her cellphone while seated on cement steps.

[H] The woman is asleep in bed.

[LABEL] contradiction [PRED] contradiction [COEFF] 11.7507

[P] A man and woman standing in shallow ocean embracing and kissing.

[H] They are asleep on the sofa.

[LABEL] contradiction [PRED] contradiction [COEFF] 11.7450

[P] A girl in a black shirt is jumping in a sandy area, and a man in a black shirt is bending over in the background.

[H] The girl is asleep in her bed.

[LABEL] contradiction [PRED] contradiction [COEFF] 11.6677

[P] A woman in an orange outfit is holding a tennis racket.

[H] The woman is asleep.

[LABEL] contradiction [PRED] contradiction [COEFF] 11.5179

[P] A girl treks through the snow with her backpack on.

[H] A girl is asleep in her bed.

[LABEL] contradiction [PRED] contradiction [COEFF] 10.9426

[P] Three young girls, each proudly displaying a baseball and a baseball glove.

[H] The girls are asleep.

[LABEL] contradiction [PRED] contradiction [COEFF] 10.7227

[P] A toddler in a red dress carries two zara shopping bags.

[H] The toddler is asleep in a stroller.

[LABEL] **contradiction** [PRED] **contradiction** [COEFF] 10.5360

[P] Musicians on a stage with green lights shining on them.

[H] The band is asleep on the tour bus.

[LABEL] **contradiction** [PRED] **contradiction** [COEFF] 10.3059

[P] A person holding a flat box is standing near two people sitting down.

[H] A person is asleep in their bed

[LABEL] **contradiction** [PRED] **contradiction** [COEFF] 9.8838

[P] A young blond woman wearing athletic attire is about to throw a blue football.

[H] A blonde woman is asleep on the grass

### 1.154 Component 153

[LABEL] **neutral** [PRED] **neutral** [COEFF] 65.2878

[P] Children run around bikes in a park next to a playground.

[H] The children are having fun.

[LABEL] **neutral** [PRED] **neutral** [COEFF] 63.4944

[P] A group of girls playing a game on horseback.

[H] The girls are having fun.

[LABEL] **neutral** [PRED] **neutral** [COEFF] 63.0870

[P] Two kids play soccer in a field.

[H] They are having fun.

[LABEL] **neutral** [PRED] **entailment** [COEFF] 61.8746

[P] Girls play jump rope in a crowded place.

[H] The girls are having fun.

[LABEL] **neutral** [PRED] **entailment** [COEFF] 60.9399

[P] A lady in a bikini doing a cartwheel in the sand.

[H] The lady is having fun.

[LABEL] **neutral** [PRED] **neutral** [COEFF] 59.9047

[P] People are riding on a ride at a theme park or carnival.

[H] They are having fun.

[LABEL] **neutral** [PRED] **neutral** [COEFF] 56.7314

[P] Two brown dogs playing in water

[H] The dogs are having fun

[LABEL] **entailment** [PRED] **entailment** [COEFF] 55.5591

[P] Children playing on the beach.

[H] Kids were having fun.

[LABEL] **neutral** [PRED] **neutral** [COEFF] 54.2349

[P] A group of people ride a roller coaster that is passing over some water.

[H] People are having fun

[LABEL] **neutral** [PRED] **neutral** [COEFF] 53.3435

[P] Some children are playing tug - of - war with a rope while an adult assists.

[H] The children are having fun.

[LABEL] **neutral** [PRED] **neutral** [COEFF] 50.9792

[P] Three males are jumping on a trampoline outside.

[H] The men are having fun.

[LABEL] **neutral** [PRED] **neutral** [COEFF] 50.4242

[P] At a crowded outdoor event, many people are milling about, with four girls playing jump - rope in the immediate foreground.

[H] The girls are having a lot of fun.

[LABEL] **neutral** [PRED] **neutral** [COEFF] 49.7870

[P] A young couple are at the beginning of playing jenga on a living room coffee table.

[H] The people are having fun

[LABEL] **neutral** [PRED] **neutral** [COEFF] 45.1198

[P] A young child is sitting in a swing at a playground.

[H] The child is having a fun time.

[LABEL] **neutral** [PRED] **entailment** [COEFF] 41.4121

[P] A girl plays in the snow by making a snow angel.

[H] A girl is having fun in the snow.

[LABEL] **neutral** [PRED] **neutral** [COEFF] 40.2934

[P] A group of boys playing soccer in a muddy wet field.

[H] The boys are having fun.

## 1.155 Component 154

[LABEL] **contradiction** [PRED] **contradiction** [COEFF] 11.1999

[P] A hot air balloon is filled with twelve different people, all wearing black, blue red or white.

[H] There is no hot air balloon.

[LABEL] **contradiction** [PRED] **contradiction** [COEFF] 10.9481

[P] A track and field athlete running on a red track in an urban city with many spectators watching.

[H] Nobody is watching.



[LABEL] **contradiction** [PRED] **contradiction** [COEFF] 10.7635  
[P] People on each side of the street are waiting for the streetlight to change, so they can cross.  
[H] Nobody is waiting.

[LABEL] **contradiction** [PRED] **contradiction** [COEFF] 10.5976  
[P] Horrific artwork displayed at the local hipster bar.  
[H] The local hipster bar has no artwork.

[LABEL] **contradiction** [PRED] **contradiction** [COEFF] 10.5633  
[P] A man laying up against a large concrete complex.  
[H] Nobody is laying.

[LABEL] **contradiction** [PRED] **contradiction** [COEFF] 10.4945  
[P] People riding on ski boats in the ocean.  
[H] Nobody is riding.

[LABEL] **contradiction** [PRED] **contradiction** [COEFF] 10.4617  
[P] The people are on the beach viewing the beauty of the ocean using a telescope.  
[H] There is no one on the beach.

[LABEL] **contradiction** [PRED] **contradiction** [COEFF] 10.3999  
[P] A sooners football player moves quickly on the field as another player runs.  
[H] Nobody is moving.

[LABEL] **contradiction** [PRED] **contradiction** [COEFF] 10.2911  
[P] The people have some animals with them.  
[H] The people have no animals.

[LABEL] **contradiction** [PRED] **contradiction** [COEFF] 10.2449  
[P] A street vendor sitting on a sidewalk with eggs and live chickens.  
[H] There is no vendor.

[LABEL] **contradiction** [PRED] **contradiction** [COEFF] 10.1659  
[P] A group of doctors performing surgery on a patient.  
[H] Nobody is performing surgery.

[LABEL] **contradiction** [PRED] **contradiction** [COEFF] 10.1642  
[P] A line of cheerleaders walking down the football field.  
[H] Nobody is walking.

[LABEL] **contradiction** [PRED] **contradiction** [COEFF] 10.1239  
[P] A group of people are picking up trash on a beach.  
[H] Nobody on the beach.

[LABEL] **contradiction** [PRED] **contradiction** [COEFF] 10.1207  
[P] A person working on a computer with other equipment with three other individuals in the background talking.

[H] Nobody is on a computer

[LABEL] **contradiction** [PRED] **contradiction** [COEFF] 10.1094

[P] A girl in a school uniform screams with a bug on her finger.

[H] Nobody is screaming.

[LABEL] **contradiction** [PRED] **contradiction** [COEFF] 9.7247

[P] Two slim, pretty women in skimpy clothes walking together.

[H] Nobody is walking.

## 1.156 Component 155

[LABEL] **contradiction** [PRED] **contradiction** [COEFF] 12.5107

[P] A man in a blue shirt getting ready to put a cracker in his soup

[H] A man is eating pizza

[LABEL] **contradiction** [PRED] **contradiction** [COEFF] 11.9613

[P] A person wearing blue rubber gloves is loading a syringe with vegetables.

[H] A person is putting meat in a syringe.

[LABEL] **contradiction** [PRED] **contradiction** [COEFF] 11.1940

[P] Two older men are having a conversation over breakfast foods.

[H] Three guys are eating pizza.

[LABEL] **contradiction** [PRED] **contradiction** [COEFF] 9.3858

[P] A person is eating a plate of pasta with a black and brown dog on his or her lap.

[H] A person eats a large hamburger.

[LABEL] **neutral** [PRED] **contradiction** [COEFF] 9.3662

[P] People in a market buying fruits and vegetables

[H] People are buying supper.

[LABEL] **contradiction** [PRED] **contradiction** [COEFF] 9.1472

[P] A man in a blue shirt barbecues meat outside.

[H] The man pours milk.

[LABEL] **contradiction** [PRED] **contradiction** [COEFF] 9.0969

[P] A married couple are cutting a wedding cake.

[H] A married couple eating a steak.

[LABEL] **contradiction** [PRED] **contradiction** [COEFF] 8.9389

[P] A young girl in leopard print stands in the kitchen holding a spatula while cooking pancakes.

[H] The girl is baking a cake.

[LABEL] **contradiction** [PRED] **contradiction** [COEFF] 8.8751

[P] A smiling cook is putting sausages on the grill.

[H] A baker is putting a cake in the oven.

[LABEL] **contradiction** [PRED] **contradiction** [COEFF] 8.8529

[P] Boy eating a slice of pizza

[H] The boy is eating cake.

[LABEL] **contradiction** [PRED] **contradiction** [COEFF] 8.8467

[P] A woman is making sub sandwiches with meat and mustard.

[H] A woman is making eggs.

[LABEL] **neutral** [PRED] **contradiction** [COEFF] 8.7440

[P] A white man with beard and earring chops onions for dinner in his home kitchen.

[H] A white man was making lunch in the kitchen

[LABEL] **contradiction** [PRED] **contradiction** [COEFF] 8.3386

[P] A man sitting on a rail next to his juicing table and some fruit.

[H] A man is cooking a hamburger on a grill.

[LABEL] **neutral** [PRED] **contradiction** [COEFF] 8.2321

[P] A man is cutting a cucumber on a wooden board.

[H] The man is making a salad.

[LABEL] **contradiction** [PRED] **contradiction** [COEFF] 8.1812

[P] 2 people preparing coffee at a shop.

[H] Two people make pancakes at a diner.

[LABEL] **contradiction** [PRED] **contradiction** [COEFF] 8.0409

[P] A man wearing a striped shirt eats some candy.

[H] A man is eating a piece of fruit.

## 1.157 Component 156

[LABEL] **entailment** [PRED] **entailment** [COEFF] 26.4645

[P] A shirtless man is having a conversation with a seated man while a blond woman sleeps.

[H] A man is having a conversation with another man while a blond woman sleeps.

[LABEL] **entailment** [PRED] **entailment** [COEFF] 25.6086

[P] Outside on a park bench an elderly man naps, while someone works in the background.

[H] A person is working in the background while another is napping on a park bench.

[LABEL] **entailment** [PRED] **entailment** [COEFF] 25.3905

[P] A man wearing a white uniform is trying to make a shot but the two men in black are trying to block him.

[H] The man is trying to make a shot while other men are blocking him.

[LABEL] **entailment** [PRED] **entailment** [COEFF] 24.4094

[P] A group of jacketed people are marching down the street in the rain while cars drive along side them.  
[H] Cars drive along in the rain while a group of people march down the street beside them.

[LABEL] entailment [PRED] entailment [COEFF] 23.5750

[P] A man in sunglasses is eating something while he has a girl on his lap.  
[H] The man is eating with a girl on his lap.

[LABEL] entailment [PRED] entailment [COEFF] 23.1036

[P] A man with two fireworks in his hands while a woman in a red cap with an arrow through her head stands to his right.  
[H] A woman dressed in red is standing next to a man who is holding something in his hands.

[LABEL] entailment [PRED] entailment [COEFF] 22.8634

[P] A person with shopping bags crosses the street behind a bus, while two others stand next to the curb.  
[H] Someone crosses a street while other people stand and a bus is nearby.

[LABEL] entailment [PRED] entailment [COEFF] 22.3955

[P] A man in a white shirt is climbing a wall while another man watches  
[H] The man is climbing the wall while being watched.

[LABEL] entailment [PRED] entailment [COEFF] 20.9251

[P] One guy with a brown short - sleeve shirt playing a violin and another guy in a red long - sleeve shirt playing the banjo inside with the curtains down.  
[H] A man wearing brown plays violin while another wearing red plays banjo.

[LABEL] entailment [PRED] entailment [COEFF] 20.6499

[P] A little girl with her hands in the air is sitting on a man's back while he is laying on a blanket.  
[H] A man is laying down and a girl is on his back.

[LABEL] entailment [PRED] entailment [COEFF] 20.3574

[P] A woman in a red t - shirt is carrying a blond child, while another woman stands nearby in the kitchen.  
[H] A woman is standing in the kitchen while the woman in red holds a child.

[LABEL] entailment [PRED] entailment [COEFF] 19.0169

[P] A blond man with a beard operates a camera while a young boy in a green shirt stands beside him holding a microphone in his hand.  
[H] Man with a beard using a camera, with a boy next to him holding a microphone.

[LABEL] entailment [PRED] entailment [COEFF] 18.9582

[P] A group of turbaned men ride motorbikes away from the viewer down a tree edged street while a white van follows them.  
[H] A group of men ride motorbikes as a van follows them.

[LABEL] entailment [PRED] entailment [COEFF] 18.6333

[P] Two russian women talk while a third walks by in the foreground.  
[H] Women are talking as another woman passes by.

[LABEL] entailment [PRED] entailment [COEFF] 18.4370

[P] A woman takes a picture of a baby wearing a pink hat while a man carries her.  
[H] A woman takes a photo of a baby and a man.

[LABEL] entailment [PRED] entailment [COEFF] 18.2322

[P] A man in a white shirt cutting a cake while coworkers watch.  
[H] A man cuts a cake while others watch.

## 1.158 Component 157

[LABEL] contradiction [PRED] contradiction [COEFF] 22.5207

[P] A man is standing in front of glass doors with a blue spot and a pink spot.  
[H] The man is flying a plane.

[LABEL] contradiction [PRED] contradiction [COEFF] 19.7372

[P] People are sitting at small tables outside.  
[H] The people are flying a plane

[LABEL] contradiction [PRED] contradiction [COEFF] 17.9697

[P] Six adult woman walk on a sidewalk along side a red building.  
[H] Six women are taking the train

[LABEL] contradiction [PRED] contradiction [COEFF] 17.6332

[P] A child in a light and dark green ensemble sits in a chair in front of a typewriter looking off - camera.  
[H] The child is driving the school bus.

[LABEL] contradiction [PRED] contradiction [COEFF] 16.1462

[P] Four asian kids are sitting on the floor in a classroom.  
[H] The asian kids are flying a plane

[LABEL] contradiction [PRED] contradiction [COEFF] 16.1403

[P] Four people walking toward a large construction tower of some kind in a lightly wooded area.  
[H] Four people are on a roller coaster ride in disneyland.

[LABEL] contradiction [PRED] contradiction [COEFF] 15.6260

[P] A man in a suit, sitting behind a desk covered with radio paraphernalia, speaks into a microphone.  
[H] The man was jumping off a train

[LABEL] contradiction [PRED] contradiction [COEFF] 15.1189

[P] Two men, one wearing a teal shirt and shin guards lay horizontally on logs with their backpacks in sight.  
[H] Two men are jumping in a river

[LABEL] contradiction [PRED] contradiction [COEFF] 14.9901

[P] An oriental man and woman wearing blue and white kimonos are sitting together.  
[H] A fighter jet landing at a airport.

[LABEL] contradiction [PRED] contradiction [COEFF] 14.8587

[P] Women with dark hair sitting and standing near a pile of trash.

[H] The women are swimming in a lake.

[LABEL] contradiction [PRED] neutral [COEFF] 14.5831

[P] Men standing around a car with a lamp behind them.

[H] The two men are going to the ballet.

[LABEL] contradiction [PRED] contradiction [COEFF] 14.5543

[P] A line of blue, green, and white booths line the side of a street outside a store with one man sitting in a booth.

[H] The man is climbing mt everest.

[LABEL] contradiction [PRED] contradiction [COEFF] 14.1627

[P] A man in a blue checked shirt is walking on the street with his hand in his pocket, and passing an orange cone.

[H] The man drove his car to work

[LABEL] contradiction [PRED] contradiction [COEFF] 13.9764

[P] A blue eyed woman sitting in front of a microphone is smiling.

[H] A woman is running a marathon.

[LABEL] contradiction [PRED] contradiction [COEFF] 13.8567

[P] Two people take in the scene as they stand together looking out over the canyon.

[H] Two people took a bus to the movie theater.

[LABEL] contradiction [PRED] contradiction [COEFF] 13.7873

[P] A woman wearing glasses is sitting down at a table with glasses, a bottle, and a bird on it.

[H] The person is running after a cab.

## 1.159 Component 158

[LABEL] entailment [PRED] entailment [COEFF] 12.4621

[P] A young girl running on the beach.

[H] A girl is running.

[LABEL] entailment [PRED] entailment [COEFF] 12.4478

[P] A child runs on a dirt path along the street.

[H] A child is running.

[LABEL] entailment [PRED] entailment [COEFF] 12.3330

[P] A child running on the sidewalk.

[H] A child is running.

[LABEL] entailment [PRED] entailment [COEFF] 11.0311

[P] A white dog with beige spots is running through a field.

[H] A dog is running.

[LABEL] entailment [PRED] entailment [COEFF] 10.5369

[P] A dog runs across the grass.

[H] A dog is running.

[LABEL] entailment [PRED] entailment [COEFF] 10.3293

[P] A young child in baggy blue pants is running away from the fire in the background.

[H] A child is running.

[LABEL] entailment [PRED] entailment [COEFF] 10.2463

[P] The black dog is running through the grass.

[H] The dog is running

[LABEL] entailment [PRED] entailment [COEFF] 10.1513

[P] A white dog running in the snow.

[H] A dog is running.

[LABEL] entailment [PRED] entailment [COEFF] 10.0282

[P] A male soccer player running on the field.

[H] A soccer player is running.

[LABEL] entailment [PRED] entailment [COEFF] 9.4253

[P] Two men in black are running through a forest.

[H] Two men are running.

[LABEL] entailment [PRED] entailment [COEFF] 9.4045

[P] A young girl in a green shirt is running in a gym.

[H] A girl is running.

[LABEL] entailment [PRED] entailment [COEFF] 9.1735

[P] A soccer player running on the field.

[H] The soccer player is running.

[LABEL] entailment [PRED] entailment [COEFF] 9.1410

[P] A golden retriever runs through a field of yellow flowers.

[H] A golden retriever is running.

[LABEL] entailment [PRED] entailment [COEFF] 9.1091

[P] A dog runs through the snow.

[H] A dog is running.

[LABEL] entailment [PRED] entailment [COEFF] 9.0853

[P] Two brown dogs are running through a grassy area.

[H] Dogs are running.

[LABEL] entailment [PRED] entailment [COEFF] 9.0773

[P] A gray dog with a muzzle running.

[H] A dog is running.

## 1.160 Component 159

[LABEL] **neutral** [PRED] **neutral** [COEFF] 25.1282

[P] A woman wearing sunglasses and jeans runs and jumps down a sand dune with has lots of tire tracks and foot prints.

[H] The woman is happy.

[LABEL] **neutral** [PRED] **neutral** [COEFF] 23.4771

[P] One young girl pushing a toy while her twin sister looks on.

[H] The girls are happy

[LABEL] **neutral** [PRED] **neutral** [COEFF] 21.6995

[P] A musician plays a drum while his hair covers his face, and tattoos dot his arms.

[H] The child was happy `

[LABEL] **neutral** [PRED] **neutral** [COEFF] 21.6408

[P] A shirtless blond - haired little boy with blue jean shorts is pretending to mow some tall grass and dandelions with his toy lawn mower.

[H] The boy is happy.

[LABEL] **neutral** [PRED] **neutral** [COEFF] 21.0357

[P] A big dog sniffs a little dog.

[H] The little dog is happy.

[LABEL] **neutral** [PRED] **neutral** [COEFF] 20.9205

[P] A little girl in a yellow hat is sitting in the grass with her eyes closed and her hand up to her face.

[H] The girl is having fun.

[LABEL] **neutral** [PRED] **neutral** [COEFF] 20.7579

[P] A crowd of people on a street corner, three boys with their shirts tucked up.

[H] The boys are dressed nicely.

[LABEL] **neutral** [PRED] **neutral** [COEFF] 20.5967

[P] There are 4 people in the snow at night wearing bathing suits standing and walking near a small building with a light on.

[H] The people are smiling

[LABEL] **neutral** [PRED] **neutral** [COEFF] 19.9346

[P] A group of men stand talking in front of a statute of a blue lion.

[H] They are happy.

[LABEL] **neutral** [PRED] **neutral** [COEFF] 19.3904

[P] A man sitting on a rock in a grass field talking on his cellphone.



[H] The man is enjoying the fresh air.

[LABEL] **neutral** [PRED] **neutral** [COEFF] 19.2647

[P] A very tan elderly couple sits partially naked on a park bench while a woman in a wedding dress, a man in a suit and a photographer walk down a trail in the background.

[H] The couple are happy

[LABEL] **neutral** [PRED] **neutral** [COEFF] 18.4832

[P] A bride and her bridesmaids are posing for a picture.

[H] The people are happy and having fun.

[LABEL] **neutral** [PRED] **neutral** [COEFF] 18.2717

[P] A woman plays hide - and - go - seek with a check scarf as she sits with a man in a dark colored jacket.

[H] The woman is happy.

[LABEL] **neutral** [PRED] **neutral** [COEFF] 17.7733

[P] A black man in a yellow cap tends some plants

[H] The man was happy.

[LABEL] **neutral** [PRED] **neutral** [COEFF] 17.7248

[P] A young girl dressed in black swings around on a rope with red ball at end.

[H] This young girl loves to play on the rope swing in the park.

[LABEL] **neutral** [PRED] **neutral** [COEFF] 17.3075

[P] A man wearing a gray shirt, blue jeans, glasses, and sneakers is teeing off a golf ball with a golf glove.

[H] It's a sunny day.

## 1.161 Component 160

[LABEL] **entailment** [PRED] **entailment** [COEFF] 34.1065

[P] A woman wearing a pink dress polka dot dress carrying a white umbrella and black purse.

[H] A woman is wearing a pink dress carrying a white umbrella.

[LABEL] **entailment** [PRED] **entailment** [COEFF] 29.8134

[P] A man in a green hat dozes while riding the train.

[H] A man wears a green hat.

[LABEL] **entailment** [PRED] **entailment** [COEFF] 25.2465

[P] A man in a green shirt and cap puts his hands on a table as he stands next to man wearing headphones around his neck.

[H] A man is wearing a green shirt

[LABEL] **entailment** [PRED] **entailment** [COEFF] 25.0287

[P] A person is holding a green basket of food near a yellow and blue umbrella.

[H] A person is holding a green basket of food

[LABEL] entailment [PRED] entailment [COEFF] 24.5487  
[P] A woman wearing a green shirt is attending cosmic bowling at the monsterbowl.  
[H] A person attending the monsterbowl wears green.

[LABEL] entailment [PRED] entailment [COEFF] 23.9995  
[P] A man wearing a green shirt is jumping his bicycle off a ramp.  
[H] A person wearing a green shirt is jumping his bicycle off a ramp.

[LABEL] entailment [PRED] entailment [COEFF] 23.9352  
[P] The woman has a light green blouse with yellow flowers on it.  
[H] The person has a light green blouse with yellow flowers on it.

[LABEL] entailment [PRED] entailment [COEFF] 22.5533  
[P] A woman is wearing a green striped shirt and a brown skirt.  
[H] A woman dressed in green and brown.

[LABEL] entailment [PRED] entailment [COEFF] 22.4542  
[P] A woman in an orange jacket sits on a bench.  
[H] A woman is wearing an orange jacket while sitting on a bench.

[LABEL] entailment [PRED] entailment [COEFF] 22.0545  
[P] Black male in blue shirt, driving a yellow and red street car, with a blue sign reading " main street only " on the front.  
[H] The black male is wearing a blue shirt

[LABEL] entailment [PRED] entailment [COEFF] 21.9440  
[P] A barber wearing his white coat trims the beard of his customer wearing the red apron.  
[H] The barber is wearing a white coat.

[LABEL] entailment [PRED] entailment [COEFF] 21.1409  
[P] A child is wearing a blue hat and snowsuit with red skis on their feet.  
[H] A kid wearing a hat has red skis.

[LABEL] entailment [PRED] entailment [COEFF] 20.7963  
[P] Little girl in a blue dress uses a pink hula - hoop.  
[H] The girl is wearing blue.

[LABEL] entailment [PRED] entailment [COEFF] 20.6399  
[P] A man in a blue dress is working under a bus, another man is rotating a tyre.  
[H] A man wears a blue dress.

[LABEL] entailment [PRED] entailment [COEFF] 20.2399  
[P] A football player in a green uniform is trying to catch the ball, while his opponent, in a blue uniform, tries to stop him.  
[H] The player is wearing green.

[LABEL] entailment [PRED] entailment [COEFF] 19.9923  
[P] A worker dressed in orange overall sprays off an ocean side road with high pressure water.  
[H] A worker is dressed in orange.

## 1.162 Component 161

[LABEL] contradiction [PRED] contradiction [COEFF] 34.5318  
[P] A basketball player falls to the court floor.  
[H] A soccer player trips

[LABEL] contradiction [PRED] contradiction [COEFF] 31.5851  
[P] A sooners football player weas the number 28 and black armbands.  
[H] A baseball player is in uniform.

[LABEL] contradiction [PRED] contradiction [COEFF] 29.7314  
[P] Soccer player kneeling down to tie her shoe.  
[H] Basketball player kneeling down to tie her shoe.

[LABEL] contradiction [PRED] contradiction [COEFF] 28.0322  
[P] A soccer game in mid match, with a person in yellow about to get the ball.  
[H] There is a tennis game.

[LABEL] contradiction [PRED] contradiction [COEFF] 27.0543  
[P] Football players engaged in a tackle.  
[H] Basketball players in a fight on the court.

[LABEL] contradiction [PRED] contradiction [COEFF] 26.3322  
[P] A tennis player is trying to hit the ball.  
[H] A basketball player is shooting hoops.

[LABEL] contradiction [PRED] contradiction [COEFF] 25.3404  
[P] Soccer player kicking yellow and blue ball.  
[H] A basketball player is dunking the ball

[LABEL] contradiction [PRED] contradiction [COEFF] 24.5267  
[P] Two basketball players play in a game.  
[H] The football players are shaking pom poms.

[LABEL] contradiction [PRED] contradiction [COEFF] 24.4814  
[P] A basketball player shooting a free throw.  
[H] A baseball player getting ready to steal a base.

[LABEL] contradiction [PRED] contradiction [COEFF] 23.9686  
[P] A tennis player in an orange outfit hits a ball.  
[H] The soccer player shot a goal

[LABEL] contradiction [PRED] contradiction [COEFF] 23.4671

[P] A football player kicks the ball.

[H] A baseball player on the bench.

[LABEL] contradiction [PRED] contradiction [COEFF] 22.9993

[P] A team of boys in red and black uniforms play soccer on a field.

[H] A lacrosse team during a game.

[LABEL] contradiction [PRED] contradiction [COEFF] 22.5843

[P] A hockey player in black and white collides with another player wearing blue.

[H] Two baseball players fight.

[LABEL] contradiction [PRED] contradiction [COEFF] 20.4003

[P] A baseball player coming into home plate with knee held high and the catcher right in front of him waiting for the ball.

[H] There is a hockey game.

[LABEL] contradiction [PRED] contradiction [COEFF] 19.8063

[P] An ice hockey player takes water from a green bottle.

[H] A tennis player is throwing a bottle.

[LABEL] contradiction [PRED] contradiction [COEFF] 19.7901

[P] A baseball player about to snatch an incoming baseball.

[H] A basketball player dribbles the ball down the court.

## 1.163 Component 162

[LABEL] neutral [PRED] contradiction [COEFF] 16.9948

[P] A girl wearing a brown jacket and jeans is sitting on a rock wall at the edge of a hill, there are several small carts in the background.

[H] A girl is sitting in a park.

[LABEL] contradiction [PRED] contradiction [COEFF] 15.6417

[P] A bunch of asian children on steps.

[H] A bunch of asian children are at the park.

[LABEL] neutral [PRED] contradiction [COEFF] 15.4805

[P] Children walking between a row of large trees.

[H] Children are walking in the park.

[LABEL] neutral [PRED] contradiction [COEFF] 14.9900

[P] Older couple posing for a picture in front of a fountain.

[H] Two people are at a park.

[LABEL] neutral [PRED] neutral [COEFF] 14.6229

[P] A woman is pushing a child on a swing.

[H] A woman and her kid are playing at the park.

[LABEL] **neutral** [PRED] **contradiction** [COEFF] 13.9123  
[P] An older man sitting outside in the sun watching something under his umbrella.  
[H] The man is in the park.

[LABEL] **neutral** [PRED] **contradiction** [COEFF] 13.7394  
[P] The young girl standing on the grass is wearing a pink dress.  
[H] A girl is waiting at park.

[LABEL] **neutral** [PRED] **contradiction** [COEFF] 13.7213  
[P] Two casually dressed men sit down and enjoy a beer and food outdoors.  
[H] They are in a park.

[LABEL] **contradiction** [PRED] **contradiction** [COEFF] 13.6535  
[P] A man and his dog play tug - of - war with a rope.  
[H] A man is walking in park

[LABEL] **neutral** [PRED] **contradiction** [COEFF] 13.6248  
[P] A toddler in a pink coat is laying front down on a red slide.  
[H] The toddler is playing in the park.

[LABEL] **neutral** [PRED] **contradiction** [COEFF] 12.8551  
[P] A woman and two children pose for a picture under some rocks.  
[H] A woman is with her children in a park.

[LABEL] **contradiction** [PRED] **contradiction** [COEFF] 12.1459  
[P] Two people sit on a well kept stone path that overlooks a large body of water.  
[H] Two people are sitting on the park bench.

[LABEL] **neutral** [PRED] **contradiction** [COEFF] 11.5404  
[P] A person in a red shirt with doing tricks with a frisbee.  
[H] The guy in a red shirt is in a park.

[LABEL] **neutral** [PRED] **neutral** [COEFF] 11.4660  
[P] A small blond girl wearing a yellow shirt sliding down a yellow slide with her feet in the air.  
[H] The small blonde girl was in the park

[LABEL] **neutral** [PRED] **contradiction** [COEFF] 10.9011  
[P] A woman holds the hand of a small girl and points towards the bushes.  
[H] The woman is playing in a park.

[LABEL] **neutral** [PRED] **neutral** [COEFF] 10.7081  
[P] A woman wearing white sunglasses is holding a plastic cup.  
[H] She is at the park.

## 1.164 Component 163

[LABEL] **contradiction** [PRED] **contradiction** [COEFF] 6.5171

[P] A boy skateboards down the railing of some graffiti stairs

[H] A boy is playing a clarinet.

[LABEL] **contradiction** [PRED] **contradiction** [COEFF] 6.5095

[P] Kids in life vests paddling a raft on water.

[H] The kids are learning how to cook.

[LABEL] **contradiction** [PRED] **contradiction** [COEFF] 6.4193

[P] A person on a dirt bike is in midair making a jump on a dirt track.

[H] The person is playing basketball.

[LABEL] **contradiction** [PRED] **contradiction** [COEFF] 5.9291

[P] A woman is riding a bike.

[H] The woman is enjoying some chocolate milk after a long work out.

[LABEL] **contradiction** [PRED] **contradiction** [COEFF] 5.5140

[P] Someone on a dirt bike, high in the air, near a building.

[H] The person is taking a bath.

[LABEL] **contradiction** [PRED] **contradiction** [COEFF] 5.1781

[P] Three men are riding horses in the rodeo with spectators watching.

[H] The men are playing polo.

[LABEL] **contradiction** [PRED] **contradiction** [COEFF] 4.9514

[P] Africans out on the river fishing in their canoe for dinner.

[H] People are eating turkey at the table.

[LABEL] **contradiction** [PRED] **contradiction** [COEFF] 4.9332

[P] A brown, wet dog shaking off the water.

[H] The dog is eating french fries.

[LABEL] **contradiction** [PRED] **contradiction** [COEFF] 4.6334

[P] A black and white dog is jumping through a black and white hoop.

[H] A dog drinks some water.

[LABEL] **contradiction** [PRED] **contradiction** [COEFF] 4.5741

[P] A girl on a skateboard is riding on a cement ledge next to a fence.

[H] She is eating an ice cream.

[LABEL] **contradiction** [PRED] **contradiction** [COEFF] 4.5041

[P] Two girls stand next to a row of bicycles with a crowd of people in the background.

[H] Two girls are selling cookies.

[LABEL] **contradiction** [PRED] **contradiction** [COEFF] 4.4638

[P] Three men having a good time while using the famous water bike.  
[H] The men are playing tennis.

[LABEL] **contradiction** [PRED] **contradiction** [COEFF] 4.4632  
[P] Three little kids in funny hats at the beach.  
[H] Three kids are skiing.

[LABEL] **contradiction** [PRED] **contradiction** [COEFF] 4.3243  
[P] A child on an amusement park swing ride.  
[H] The child is at home watching cartoons.

[LABEL] **contradiction** [PRED] **contradiction** [COEFF] 4.1298  
[P] Two young boys run on the beach with ducks behind them in the pond.  
[H] Two boys are catching fireflies.

[LABEL] **contradiction** [PRED] **contradiction** [COEFF] 4.1237  
[P] A little girl enjoying the snow on her snowboard.  
[H] The girl has begun surfing lessons on the beach.

## 1.165 Component 164

[LABEL] **entailment** [PRED] **entailment** [COEFF] 8.4702  
[P] A woman with an umbrella and other people walking on a street.  
[H] There is a woman with an umbrella and other people walking on a street.

[LABEL] **entailment** [PRED] **entailment** [COEFF] 8.3697  
[P] People moving by a corner in a town.  
[H] People moving by a corner in town.

[LABEL] **entailment** [PRED] **entailment** [COEFF] 7.3326  
[P] A little girl in a dress on a playground.  
[H] A girl in a dress on a playground.

[LABEL] **entailment** [PRED] **entailment** [COEFF] 7.2480  
[P] A man is jumping it a meadow  
[H] A man is jumping a meadow.

[LABEL] **entailment** [PRED] **entailment** [COEFF] 7.1688  
[P] Three men and a little boy looking at a model train.  
[H] Three men and a boy are looking at a model train.

[LABEL] **entailment** [PRED] **entailment** [COEFF] 7.1061  
[P] A woman in a military uniform gives an inflated rubber glove to some children.  
[H] A military woman gives a glove to kids.

[LABEL] **entailment** [PRED] **entailment** [COEFF] 7.0678

[P] A girl in a white jacket is selling pastries out of a box.

[H] A girl is selling pastries.

[LABEL] **entailment** [PRED] **entailment** [COEFF] 6.9831

[P] A young girl in a yellow shirt is holding a bird for a speaker.

[H] A girl is holding a bird for a speaker.

[LABEL] **entailment** [PRED] **entailment** [COEFF] 6.9134

[P] Two people are reading something while sitting on a bench.

[H] Two people seated on a bench while reading.

[LABEL] **entailment** [PRED] **entailment** [COEFF] 6.8693

[P] A woman sitting in a car painting her nails.

[H] A person sitting in a car painting her nails.

[LABEL] **neutral** [PRED] **entailment** [COEFF] 6.6914

[P] A child in a store looking at toys

[H] The child is in a store looking at toys

[LABEL] **entailment** [PRED] **entailment** [COEFF] 6.5595

[P] Two gymnasts in blue and gold uniforms are holding hula hoops as a part of a routine.

[H] Gymnasts in blue and gold uniforms are holding hula hoops as a part of a routine.

[LABEL] **entailment** [PRED] **entailment** [COEFF] 6.5246

[P] A man working on his roof.

[H] A man works on his roof.

[LABEL] **entailment** [PRED] **entailment** [COEFF] 6.4916

[P] A child sitting on a carousel horse.

[H] A child sits on a carousel horse.

[LABEL] **entailment** [PRED] **entailment** [COEFF] 6.4307

[P] There is a woman riding a bike down the road, and she popped a wheelie.

[H] A woman pops a wheelie as she rides a bike

[LABEL] **entailment** [PRED] **entailment** [COEFF] 6.3885

[P] A guy sitting on the side of a building holding some kind of object with a couple things hanging around his neck.

[H] A guy sits on the side of a building.

## 1.166 Component 165

[LABEL] **entailment** [PRED] **entailment** [COEFF] 7.7497

[P] Woman cooking food and putting it on a plate.

[H] A woman prepares food.



[LABEL] entailment [PRED] entailment [COEFF] 7.5724  
[P] These two ladies are working in the fields.  
[H] Two women do field work.

[LABEL] entailment [PRED] entailment [COEFF] 7.4442  
[P] A little boy is playing with some trains.  
[H] A boy plays with trains.

[LABEL] entailment [PRED] entailment [COEFF] 7.3944  
[P] A group of cats sit in the grass.  
[H] Cats sit in the grass.

[LABEL] neutral [PRED] entailment [COEFF] 7.1361  
[P] A female researcher looking through a microscope.  
[H] A woman is researching with a microscope.

[LABEL] entailment [PRED] entailment [COEFF] 6.7406  
[P] A group of adults and children are hiking through the woods.  
[H] People hike in woods

[LABEL] entailment [PRED] entailment [COEFF] 6.5352  
[P] Two ladies selling their wares in an open market.  
[H] Two ladies sell their goods at a market.

[LABEL] entailment [PRED] entailment [COEFF] 6.2310  
[P] Several construction workers are looking at an escalator  
[H] Workers look at an escalator.

[LABEL] entailment [PRED] entailment [COEFF] 6.2285  
[P] A group of travelers are waiting on their train.  
[H] People are waiting for a train.

[LABEL] entailment [PRED] entailment [COEFF] 6.1954  
[P] A musical act is performing for an audience.  
[H] Musical act is performed for an audience

[LABEL] entailment [PRED] entailment [COEFF] 6.1300  
[P] The little boy is walking down the sidewalk in his mothers shoes.  
[H] A boy wears his mothers shoes

[LABEL] entailment [PRED] entailment [COEFF] 6.1128  
[P] A few people standing on a street corner waiting to go across.  
[H] People wait to cross a street.

[LABEL] entailment [PRED] entailment [COEFF] 6.0838  
[P] Two females from different teams playing basketball.  
[H] Two woman play basketball.

[LABEL] **entailment** [PRED] **entailment** [COEFF] 6.0043  
[P] A seated woman reading a newspaper on a subway platform.  
[H] A woman reads a newspaper.

[LABEL] **entailment** [PRED] **entailment** [COEFF] 5.8672  
[P] The motorcycle racer in a yellow uniform is in midair.  
[H] A person wears a yellow uniform on a motorcycle.

[LABEL] **entailment** [PRED] **entailment** [COEFF] 5.8170  
[P] The two children swinging together on a swing.  
[H] Two children swing.

### 1.167 Component 166

[LABEL] **contradiction** [PRED] **contradiction** [COEFF] 9.7261  
[P] One adult sitting next to three young children eating ice cream on some steps.  
[H] A family is eating pizza on the couch.

[LABEL] **contradiction** [PRED] **contradiction** [COEFF] 9.2706  
[P] A small black dog is running along side a bigger tri - colored dog that is carrying a rope toy in its mouth.  
[H] Two dogs are playing with a tennis ball.

[LABEL] **contradiction** [PRED] **contradiction** [COEFF] 9.1807  
[P] A man and woman wearing coats taking a walk.  
[H] A couple in swimsuits rests by the beach.

[LABEL] **contradiction** [PRED] **contradiction** [COEFF] 8.4227  
[P] Two young men in bathing suits standing next to fence on the beach.  
[H] Two boys are playing baseball.

[LABEL] **contradiction** [PRED] **contradiction** [COEFF] 8.2978  
[P] Girl wearing a hat and holding her bike talks to her friend.  
[H] Two children are riding on a horse through the pasture.

[LABEL] **contradiction** [PRED] **contradiction** [COEFF] 8.2318  
[P] A man helps a little boy climb to the top of a pole on a jungle gym.  
[H] Two people are playing on a playground.

[LABEL] **contradiction** [PRED] **contradiction** [COEFF] 8.2223  
[P] A man and a boy engage in a game of ping - pong.  
[H] Two people play tennis.

[LABEL] **contradiction** [PRED] **contradiction** [COEFF] 8.2091  
[P] A group of girls sitting on blankets in a park area reading books.  
[H] A crowd of people play with a frisbee in the park.

[LABEL] **contradiction** [PRED] **contradiction** [COEFF] 8.2034

[P] A guy in a pink shirt riding a bike and listening to music.

[H] A boy driving a car

[LABEL] **contradiction** [PRED] **contradiction** [COEFF] 8.1452

[P] A toddler examines a small sailboat that has been filled with sand to make a sandbox.

[H] A child swims at the pool.

[LABEL] **contradiction** [PRED] **contradiction** [COEFF] 7.9731

[P] A dog jumping at the beach.

[H] People chasing a tiger.

[LABEL] **contradiction** [PRED] **contradiction** [COEFF] 7.9349

[P] Large dog plays with two smaller dogs on grass.

[H] Three dogs are swimming in an aquarium.

[LABEL] **contradiction** [PRED] **contradiction** [COEFF] 7.7641

[P] A man with long hair and a blue shirt is sitting outside with his guitar case open, laughing as a young girl sits and watches.

[H] A man with a trumpet plays a song while an audience claps.

[LABEL] **contradiction** [PRED] **contradiction** [COEFF] 7.6562

[P] Two children run and play in the grass.

[H] A family is watching a movie.

[LABEL] **entailment** [PRED] **contradiction** [COEFF] 7.5831

[P] Asian man in red and black playing basketball.

[H] A man is getting exercise.

[LABEL] **contradiction** [PRED] **contradiction** [COEFF] 7.5233

[P] A little boy and girl riding their bikes down the sidewalk with training wheels on.

[H] Three children are playing on the swings.

## 1.168 Component 167

[LABEL] **entailment** [PRED] **entailment** [COEFF] 48.1209

[P] Small black and brown dog playing with a red ball in the grass.

[H] A dog plays with a ball in the grass.

[LABEL] **entailment** [PRED] **entailment** [COEFF] 47.2109

[P] A brown dog is running down a green and yellow obstacle.

[H] A dog is running down an obstacle.

[LABEL] **entailment** [PRED] **entailment** [COEFF] 46.1809

[P] A brown dog in the snow holding a pink hat.

[H] A dog in the snow holding a hat.

[LABEL] entailment [PRED] entailment [COEFF] 35.1576

[P] A black dog nurses white puppies.

[H] A dog nurses pups.

[LABEL] entailment [PRED] entailment [COEFF] 33.3170

[P] A brown and white dog is jumping over a yellow and red pole.

[H] A dog jumping over a pole

[LABEL] entailment [PRED] entailment [COEFF] 32.8006

[P] A brown dog wearing a blue harness jumps over the grassy field.

[H] A dog jumps over the grassy field.

[LABEL] entailment [PRED] entailment [COEFF] 30.9209

[P] A man wearing green is jumping and holding a red and white ball.

[H] A jumping man holds a ball.

[LABEL] entailment [PRED] entailment [COEFF] 28.3829

[P] Two male workers whitewash a brown bench.

[H] Two workers whitewash a bench.

[LABEL] entailment [PRED] entailment [COEFF] 28.0532

[P] The girl is holding a green ball.

[H] The girl is holding a ball.

[LABEL] entailment [PRED] entailment [COEFF] 25.2758

[P] A white man wearing a hat is holding a black child.

[H] A man is holding a child.

[LABEL] entailment [PRED] entailment [COEFF] 23.1228

[P] A man wearing a white shirt is selecting some green produce from a box at an outdoor market, while holding a blue basket in one hand.

[H] A man is holding a basket.

[LABEL] entailment [PRED] entailment [COEFF] 22.8835

[P] A black dog jumping over a yellow pole in an obstacle course

[H] A dog jumping over an object.

[LABEL] entailment [PRED] entailment [COEFF] 22.3458

[P] A man carrying a red bag is looking closely at the black train that is emitting smoke.

[H] A man with a bag looking at a train.

[LABEL] entailment [PRED] entailment [COEFF] 21.8814

[P] People with their faces painted holding orange balloons.

[H] People with their faces painted holding balloons.

[LABEL] entailment [PRED] entailment [COEFF] 21.1992

[P] A man in a green coat pulls a red suitcase behind him.

[H] The man in a coat has a suitcase.

[LABEL] **contradiction** [PRED] **entailment** [COEFF] 20.8644

[P] The person in blue jeans holds a yellow fish.

[H] A person holds a fish

## 1.169 Component 168

[LABEL] **neutral** [PRED] **contradiction** [COEFF] 19.9281

[P] A woman is riding her horse over dirt ground with tall trees in the background.

[H] Nancy was on the dirt road.

[LABEL] **neutral** [PRED] **contradiction** [COEFF] 18.9904

[P] A toddler wearing a dark blue jacket and knit cap is standing on gravel and pointing upward, with stone columns and a wooden display board in the background.

[H] The toddler is standing in the street.

[LABEL] **neutral** [PRED] **contradiction** [COEFF] 16.8678

[P] A woman in blue, holds a purple umbrella.

[H] A woman is standing in the rain.

[LABEL] **entailment** [PRED] **contradiction** [COEFF] 16.5571

[P] A teen girl and man are trying to arrange some roses for a celebration.

[H] The girl and man are setting up a party.

[LABEL] **contradiction** [PRED] **contradiction** [COEFF] 15.5481

[P] A man in blue jeans is picking something out of a blue bucket on the walkway.

[H] A person is carrying an armload of laundry.

[LABEL] **neutral** [PRED] **contradiction** [COEFF] 14.9640

[P] A child in a red shirt climbs on play equipment.

[H] A girl in a red top climbs a jungle gym.

[LABEL] **neutral** [PRED] **neutral** [COEFF] 14.7707

[P] A person wearing a brown outfit and large cone shaped hat sitting on stairs with plates of red items.

[H] A man in a dunce's cap gives out red cupcakes to the people in his building.

[LABEL] **entailment** [PRED] **contradiction** [COEFF] 14.3928

[P] A group of people are standing in a room filled with wooden furniture.

[H] The people are inside a building.

[LABEL] **entailment** [PRED] **contradiction** [COEFF] 14.2235

[P] A man stands on the side of the road, holding a cardboard sign.

[H] A man is waiting outside

[LABEL] **neutral** [PRED] **neutral** [COEFF] 14.1719  
[P] A man in camouflage is shooting a gun while another man watches.  
[H] Two men are practicing at a shooting range.

[LABEL] **neutral** [PRED] **contradiction** [COEFF] 13.6954  
[P] A young child plays with sidewalk chalk by dropping it on the ground.  
[H] The young child is getting chalk all over themselves.

[LABEL] **contradiction** [PRED] **contradiction** [COEFF] 13.6055  
[P] A person with a red shirt is being assisted in mixing ingredients.  
[H] A person is ordering take out.

[LABEL] **neutral** [PRED] **neutral** [COEFF] 13.3992  
[P] A lady in a uniform is using a yellow mop bucket.  
[H] A lady is at work mopping the floors.

[LABEL] **entailment** [PRED] **contradiction** [COEFF] 13.3470  
[P] A man uses a net to help reel in the fish he has caught.  
[H] A man is on a boat.

[LABEL] **entailment** [PRED] **contradiction** [COEFF] 13.0466  
[P] A photo taken in a sepia setting with a man walking towards the camera along a cobble road lined with parked cars.  
[H] A person in the middle of a public area.

[LABEL] **neutral** [PRED] **neutral** [COEFF] 13.0104  
[P] A mother and her young son enjoying a beautiful day outside.  
[H] A mother and child are heading towards the fair.

## 1.170 Component 169

[LABEL] **contradiction** [PRED] **contradiction** [COEFF] 47.4145  
[P] A group of people are walking down a rural street.  
[H] The two people were running down the street.

[LABEL] **contradiction** [PRED] **contradiction** [COEFF] 43.8732  
[P] People walking down a street on a sunny day.  
[H] People are running down the street.

[LABEL] **contradiction** [PRED] **contradiction** [COEFF] 41.7311  
[P] People walking down a dirt path.  
[H] The people are running down the path.

[LABEL] **contradiction** [PRED] **contradiction** [COEFF] 34.8245  
[P] These people are walking down the street.  
[H] People are running across a street.

[LABEL] **neutral** [PRED] **contradiction** [COEFF] 34.7986  
[P] Two women in coats are walking together in a park area.  
[H] Two women running in park

[LABEL] **contradiction** [PRED] **contradiction** [COEFF] 34.5077  
[P] A man and a woman are walking around a path outside.  
[H] A man and a woman are running around a path outside.

[LABEL] **contradiction** [PRED] **contradiction** [COEFF] 31.8257  
[P] Two men in black suits are walking towards a business office.  
[H] Two men are running.

[LABEL] **contradiction** [PRED] **contradiction** [COEFF] 30.4017  
[P] People walking down a sidewalk on a beach.  
[H] People are running down the beach

[LABEL] **contradiction** [PRED] **contradiction** [COEFF] 29.2852  
[P] Two men in tuxedos and with hats are walking down a street.  
[H] Two men are running to the bar.

[LABEL] **contradiction** [PRED] **contradiction** [COEFF] 29.0717  
[P] A man with a coat is walking in front of a mural.  
[H] The man is running.

[LABEL] **contradiction** [PRED] **contradiction** [COEFF] 28.3566  
[P] People taking a walk on a trail on a nice cloudy day.  
[H] People are running on the trail.

[LABEL] **contradiction** [PRED] **contradiction** [COEFF] 24.9244  
[P] Two women power walking in the streets.  
[H] Two women running in the streets.

[LABEL] **contradiction** [PRED] **contradiction** [COEFF] 21.9445  
[P] A man and woman are walking past a pot of flowers in a glass case.  
[H] The man and the woman are running through the desert towards the oasis.

[LABEL] **contradiction** [PRED] **contradiction** [COEFF] 20.7438  
[P] Skiers walking up the hill through a forest.  
[H] Skiers are running down a mountain.

[LABEL] **contradiction** [PRED] **contradiction** [COEFF] 20.7279  
[P] A man is walking down the street wearing white and red.  
[H] Someone is running down the hill.

[LABEL] **contradiction** [PRED] **contradiction** [COEFF] 20.6205  
[P] Two ladies walk down a street wearing black lingerie and green skirts with garter belts.

[H] Ladies are running down the street.

## 1.171 Component 170

[LABEL] entailment [PRED] entailment [COEFF] 11.2465

[P] A little boy with black curly hair sitting in a blue chair that is on the sidewalk.

[H] A boy is sitting outside.

[LABEL] entailment [PRED] entailment [COEFF] 11.0571

[P] The little girl is carrying a pink and blue toy as she walks on the path.

[H] A girl walks through a path with her toy.

[LABEL] entailment [PRED] entailment [COEFF] 11.0172

[P] A skinny white man wearing a backpack is walking across the street.

[H] A man crosses a street.

[LABEL] entailment [PRED] entailment [COEFF] 10.5110

[P] The lady wearing a black top is playing the cello.

[H] A woman is playing the cello.

[LABEL] entailment [PRED] entailment [COEFF] 10.4632

[P] A brown and white dog is standing in the river by the bank.

[H] An animal stands on the shore of a river.

[LABEL] entailment [PRED] entailment [COEFF] 9.8020

[P] An old man in a suit jacket and glasses is standing in front of an adults only establishment painted blue.

[H] An old man is in front of a building.

[LABEL] entailment [PRED] entailment [COEFF] 9.4416

[P] A small boy wearing a yellow shirt is standing next to a red wall.

[H] A boy standing near a wall.

[LABEL] entailment [PRED] entailment [COEFF] 9.0862

[P] A white - haired, bearded man stands leans against a low wall next to a red cylinder reading " clearance. "

[H] A man leans against a wall.

[LABEL] entailment [PRED] entailment [COEFF] 8.9402

[P] A man in a yellow shirt and jeans is walking down the street drinking a beverage from a bottle.

[H] A man walks down the street.

[LABEL] entailment [PRED] entailment [COEFF] 8.9153

[P] This black dude, in the brown shirt, is singing a song.

[H] A man is singing a song.

[LABEL] entailment [PRED] entailment [COEFF] 8.7820



[P] The brown dog is walking through a river surrounded by bushes.

[H] An animal is taking a walk in a river.

[LABEL] **entailment** [PRED] **entailment** [COEFF] 8.7741

[P] The young worker in blue mops up the dining room.

[H] A person cleans up the room.

[LABEL] **entailment** [PRED] **entailment** [COEFF] 8.7714

[P] A young adult woman in a white shirt is working on a clay vase with white flowers on it.

[H] A woman is working on a vase.

[LABEL] **entailment** [PRED] **entailment** [COEFF] 8.4243

[P] An asian woman, dressed in a bright pink shirt, is washing her clothes in the river.

[H] A person is washing her clothes.

[LABEL] **entailment** [PRED] **entailment** [COEFF] 8.4039

[P] A middle - aged man with a broken left arm wearing a suit, who is walking by a couple of women on a sidewalk.

[H] A man has an injured arm.

[LABEL] **entailment** [PRED] **entailment** [COEFF] 8.3103

[P] A soaking wet dog is splashing through the water.

[H] An animal is in the water.

## 1.172 Component 171

[LABEL] **contradiction** [PRED] **contradiction** [COEFF] 37.8817

[P] Three men in army camouflage sitting in a half circle talking.

[H] Three women in army camouflage sitting in a half circle talking.

[LABEL] **contradiction** [PRED] **contradiction** [COEFF] 36.1733

[P] Two men painting graffiti on a wall.

[H] Two women painting graffiti on a wall.

[LABEL] **contradiction** [PRED] **contradiction** [COEFF] 34.5136

[P] Two men drinking beer in a bar.

[H] Two women drinking beer in a bar.

[LABEL] **contradiction** [PRED] **contradiction** [COEFF] 31.0322

[P] Two men are sitting in an airport waiting area writing in notebooks.

[H] Two women are sitting in an airport waiting area writing in notebooks.

[LABEL] **contradiction** [PRED] **contradiction** [COEFF] 29.8998

[P] Two men looking at each other with computer monitors in the foreground.

[H] There are two women staring at each other

[LABEL] contradiction [PRED] contradiction [COEFF] 29.5407

[P] Three men are walking around in an open, stone building that has sand as the floor.

[H] Three women are walking around in an open, stone building that has sand as the floor.

[LABEL] contradiction [PRED] contradiction [COEFF] 27.5859

[P] Two men sit around a shiny grill.

[H] Two women sit around a grill

[LABEL] contradiction [PRED] contradiction [COEFF] 25.5949

[P] Three men in reflective gear stand next to a wall.

[H] Three women stand next to a wall.

[LABEL] contradiction [PRED] contradiction [COEFF] 21.6160

[P] Three asian men in a kitchen cooking.

[H] Three women are cooking in a kitchen.

[LABEL] contradiction [PRED] contradiction [COEFF] 21.1190

[P] Three men, crosscountry skiing, in a field of snow.

[H] Three women are standing in a field with their skis.

[LABEL] contradiction [PRED] contradiction [COEFF] 20.9299

[P] Two young men, both wearing orange vests and khakis walking down a street.

[H] Two young women, both wearing orange vests and khakis walking down a street.

[LABEL] contradiction [PRED] contradiction [COEFF] 20.8400

[P] Three males are walking across a field.

[H] Three females are walking across a field.

[LABEL] contradiction [PRED] contradiction [COEFF] 19.9916

[P] Three men in uniform, one in a blue turban, sit under a tree on a raised stone platform.

[H] Three women sit under a tree

[LABEL] contradiction [PRED] contradiction [COEFF] 18.8090

[P] 2 men in a field are practicing a martial arts move while another man stands nearby and watches.

[H] 2 women practice a move

[LABEL] contradiction [PRED] contradiction [COEFF] 17.5487

[P] Three men in white are painting the railing of the pier blue.

[H] Three women are painting the pier.

[LABEL] contradiction [PRED] contradiction [COEFF] 16.6667

[P] Two men riding horses while wearing traditional gaucho wear and chasing down a small calf in front of a spectator rodeo crowd.

[H] Two women on bulls chase a horse.

## 1.173 Component 172

[LABEL] contradiction [PRED] contradiction [COEFF] 31.0345

[P] Two uniformed men walking down the street.

[H] The pigs ate roaches

[LABEL] contradiction [PRED] contradiction [COEFF] 29.7495

[P] A military uniformed man performing a takedown maneuver on a similarly dressed man.

[H] The two girls eat french fries

[LABEL] contradiction [PRED] contradiction [COEFF] 28.8995

[P] Eight female dancers in brightly colored dresses on a purple floor, patterned with interlocking rings, look up at the stage lights.

[H] Man cooks steak

[LABEL] contradiction [PRED] contradiction [COEFF] 26.9085

[P] A girl in a multicolored dress standing next to a boy in black who is also wearing black sunglasses.

[H] Cow licks grass

[LABEL] contradiction [PRED] contradiction [COEFF] 26.0688

[P] Equestrian competing in a competition

[H] Two cats are scratching the couch.

[LABEL] contradiction [PRED] contradiction [COEFF] 25.8814

[P] Men in fancy military uniforms are riding through a field on horseback.

[H] A shark leaping from the sea to eat a seal.

[LABEL] contradiction [PRED] contradiction [COEFF] 25.7186

[P] Foreign folk dancers are dressed in outfits of bright lime green, red and white tops, lime green headbands and red, blousy trousers and open - toed specialty shoes while dancing in a city street, while spectators enjoy the show.

[H] Two missiles are loaded onto an air fighter.

[LABEL] contradiction [PRED] contradiction [COEFF] 25.6899

[P] Scientist in a laboratory, viewing something through a microscope.

[H] The man eats pizza

[LABEL] contradiction [PRED] contradiction [COEFF] 25.4747

[P] A jazz cover band plays under hot strobe lights.

[H] The frog eats grass

[LABEL] contradiction [PRED] contradiction [COEFF] 24.8247

[P] People are walking past a vendor on the street who has a lot of large mylar balloons.

[H] A young boy bowls with his father.

[LABEL] contradiction [PRED] contradiction [COEFF] 24.4517

[P] A welder in protective clothing and mask works to weld together pieces of metal on a structure that is coming up out of a body of water.

[H] Girl eats burgers

[LABEL] **contradiction** [PRED] **contradiction** [COEFF] 24.3822

[P] Multiple persons are swimming in a swimming pool.

[H] Its snowing outside

[LABEL] **contradiction** [PRED] **contradiction** [COEFF] 24.3262

[P] A guy at a bowling alley is posed with his feet off the ground.

[H] Dog sleeps in bed

[LABEL] **entailment** [PRED] **contradiction** [COEFF] 22.0152

[P] Surfer in wetsuit riding before a wave

[H] A child was there

[LABEL] **contradiction** [PRED] **contradiction** [COEFF] 21.9877

[P] Two martial artists, one wearing mainly white and one wearing mainly black, fighting while a spectator with red - hair watches in the background.

[H] Two cats lay in a long field of grass.

[LABEL] **contradiction** [PRED] **contradiction** [COEFF] 18.4942

[P] 3 police are on skates in the city center.

[H] The child is sleep

## 1.174 Component 173

[LABEL] **neutral** [PRED] **neutral** [COEFF] 32.2024

[P] A man in a plaid shirt and long pants stands on the beach in front of a boy in a light blue shirt and shorts.

[H] A man is about to teach his son how to swim in the ocean.

[LABEL] **neutral** [PRED] **neutral** [COEFF] 26.9276

[P] A lone man climbing the side of a large rock wall.

[H] The man is trying to rescue someone at the top of the wall.

[LABEL] **neutral** [PRED] **neutral** [COEFF] 26.6074

[P] A bmx biker performing a trick in midair over a dirt course.

[H] The biker is trying to win first prize in the competition.

[LABEL] **entailment** [PRED] **neutral** [COEFF] 26.3381

[P] A man is in his most aerodynamic position during a bicycle race.

[H] The man is trying to win this bicycle race

[LABEL] **neutral** [PRED] **neutral** [COEFF] 25.2476

[P] 2 hockey players in black gold and white, one has the puck with his stick and is skating.

[H] The hockey players are trying to win the game.

[LABEL] **neutral** [PRED] **neutral** [COEFF] 24.4082

[P] A young girl in a pink shirt walks towards a bird.

[H] The young girl wants to pet the bird.

[LABEL] **neutral** [PRED] **neutral** [COEFF] 23.5226

[P] A large bird stands in the water on the beach.

[H] The bird is looking for fish to eat.

[LABEL] **neutral** [PRED] **neutral** [COEFF] 23.0512

[P] Observers and players watch a batting from a batter at a game.

[H] The people are trying to recruit the batter.

[LABEL] **neutral** [PRED] **neutral** [COEFF] 22.8048

[P] A man in a brown collared shirt stares off into the distance at a park.

[H] The man is looking for a friend in the distance.

[LABEL] **neutral** [PRED] **neutral** [COEFF] 22.7573

[P] Many people are sitting outside the leaning tower of piza, one girl dressed in green is facing the camera and eating a sandwich.

[H] People are anxious to visit the tower

[LABEL] **neutral** [PRED] **neutral** [COEFF] 21.9482

[P] A boy climbs up some rocks.

[H] A boy is working on his dream of becoming a rock climber.

[LABEL] **neutral** [PRED] **neutral** [COEFF] 21.8216

[P] A group of people in life vests and hard hats on a boat.

[H] The people are going out to rescue somebody.

[LABEL] **neutral** [PRED] **neutral** [COEFF] 21.5773

[P] A group of men on stairs leading to a large body of water.

[H] The men are about to go swimming.

[LABEL] **neutral** [PRED] **neutral** [COEFF] 21.5283

[P] A man fishing while standing on a small boat holding a net

[H] The man is hoping to catch the biggest fish for a competition.

[LABEL] **neutral** [PRED] **neutral** [COEFF] 21.2324

[P] A woman with long dark hair standing in front of a window.

[H] The woman is waiting for her husband to come home

[LABEL] **neutral** [PRED] **neutral** [COEFF] 20.6368

[P] A man jumps rope while a crowd of people watch him.

[H] The man is trying for the world record of jump roping

## 1.175 Component 174

[LABEL] contradiction [PRED] contradiction [COEFF] 10.7197

[P] There is a man and a woman sitting on lawn chairs next to a skate park with a group of guys on bicycles in the background and a woman with a child in a stroller on the side of the picture.

[H] Patrons are waiting at the lobby of a theater.

[LABEL] contradiction [PRED] contradiction [COEFF] 10.4198

[P] An orchestra and choir prepare to perform in front of a golden statue in a large building surrounded by columns.

[H] An orchestra and choir are flying in an airplane to get home for the holidays.

[LABEL] contradiction [PRED] contradiction [COEFF] 10.2246

[P] A woman in red shorts is rollerskating.

[H] A woman in black bursts through the office doors, having had quite enough of all that.

[LABEL] contradiction [PRED] contradiction [COEFF] 10.2147

[P] A person wrapped in wrapping paper and tinsel.

[H] A woman is wearing her bathrobe and curling her hair while looking in the mirror.

[LABEL] contradiction [PRED] contradiction [COEFF] 9.9648

[P] A man is chopping up a roast pig.

[H] The man was on a boat all day fishing

[LABEL] contradiction [PRED] contradiction [COEFF] 9.5454

[P] A hispanic woman is washing her dishes with a sponge.

[H] The woman is throwing the garbage out in the garbage can in the back alley.

[LABEL] contradiction [PRED] contradiction [COEFF] 9.5385

[P] A man in yellow shorts throws down grains of rice in a rice paddy field.

[H] The man wearing a suit walks along the sidewalk.

[LABEL] contradiction [PRED] contradiction [COEFF] 9.2853

[P] A tall, light brown dog is drinking water from atop a table while a small black dog jumps off the table.

[H] The two dogs are chasing a frisbee across the field, thrown over and over by their owner.

[LABEL] contradiction [PRED] contradiction [COEFF] 9.1502

[P] Soccer players warm up by kicking the soccer ball around while the crowd waits.

[H] The players were on a bus which broke down on the highway

[LABEL] contradiction [PRED] contradiction [COEFF] 9.0157

[P] A hiker walks up a path of stone steps using a walking stick.

[H] A hiker is watching bears from the balcony of his cabin.

[LABEL] contradiction [PRED] contradiction [COEFF] 8.7737

[P] Four people, two of whom can be seen wearing conference badges, are grouped around a long table with several laptops on it.

[H] The people are standing in line at the water slide.

[LABEL] **contradiction** [PRED] **contradiction** [COEFF] 8.5844

[P] Two boys are standing on sand next to an overturned chair.

[H] An arabian horse prances to the top of a sand dune.

[LABEL] **contradiction** [PRED] **contradiction** [COEFF] 8.4803

[P] A man in a business suit talking on the phone and carrying a briefcase walking by a mirrored building.

[H] There is a homeless man begging for money near a wal - mart.

[LABEL] **contradiction** [PRED] **contradiction** [COEFF] 8.4693

[P] A woman is watching her child, who is in front of a chicken inside a cage.

[H] A man jogs down the street, waving to neighbors.

[LABEL] **contradiction** [PRED] **contradiction** [COEFF] 8.2712

[P] Three people, a man and two women, gesture as they look at something in front of a stone wall.

[H] Three women are running by a fence.

[LABEL] **contradiction** [PRED] **contradiction** [COEFF] 8.2639

[P] Young boy eats a slice of pizza

[H] A young boy waves as he crosses the street.

## 1.176 Component 175

[LABEL] **entailment** [PRED] **entailment** [COEFF] 71.0705

[P] Three people pose with their political signs out in public.

[H] Some humans posing

[LABEL] **entailment** [PRED] **contradiction** [COEFF] 65.4789

[P] People are lying on lounge chairs.

[H] Humans lying down.

[LABEL] **entailment** [PRED] **entailment** [COEFF] 54.8280

[P] Two men walking down the sidewalk where cars are parked.

[H] Some humans walking

[LABEL] **entailment** [PRED] **entailment** [COEFF] 54.1943

[P] People are sitting on a ledge on the side of a street, the girl in the front has high heels on.

[H] Humans sitting.

[LABEL] **entailment** [PRED] **contradiction** [COEFF] 52.3052

[P] A crowd of people are in the street for a public event.

[H] Humans in the street

[LABEL] **entailment** [PRED] **entailment** [COEFF] 50.4517

[P] People shopping for clothes in a large room with windows on the ceiling.

[H] Humans shopping.

[LABEL] **entailment** [PRED] **entailment** [COEFF] 47.9582

[P] Two people walk past the bleecker street records store.

[H] Some humans walking

[LABEL] **entailment** [PRED] **entailment** [COEFF] 46.5580

[P] Two people wearing masks, one green one purple.

[H] Humans wearing masks

[LABEL] **entailment** [PRED] **entailment** [COEFF] 46.3510

[P] There are several people standing on the platform waiting for the subway or train.

[H] A group of humans waits for train

[LABEL] **entailment** [PRED] **entailment** [COEFF] 46.2547

[P] A group of amish - looking people stand on a hill overlooking a beautiful forest.

[H] Humans standing.

[LABEL] **entailment** [PRED] **entailment** [COEFF] 45.7929

[P] Two people playing a game, one is in the act of throwing a small beanbag at a box in the foreground.

[H] Humans playing

[LABEL] **entailment** [PRED] **entailment** [COEFF] 45.7518

[P] Many people protest as they walk down the street.

[H] Many humans revolt as they step down the road.

[LABEL] **entailment** [PRED] **entailment** [COEFF] 43.7269

[P] People in a school cafeteria with a boy in the foreground wearing yellow and brown stripes

[H] Humans in a school

[LABEL] **entailment** [PRED] **entailment** [COEFF] 42.4472

[P] Two people play foosball.

[H] There are humans playing a game.

[LABEL] **entailment** [PRED] **entailment** [COEFF] 40.4327

[P] People walking in a supermarket.

[H] Humans walking

[LABEL] **entailment** [PRED] **contradiction** [COEFF] 39.0654

[P] Three men stand outside a building balcony in the sun.

[H] Some humans standing.

## 1.177 Component 176

[LABEL] **contradiction** [PRED] **contradiction** [COEFF] 35.4315

[P] Man in a black coat waving a flag around.



[H] The man is wearing a blue coat.

[LABEL] contradiction [PRED] contradiction [COEFF] 27.3720

[P] Man in black jacket and baseball cap juggling on a street.

[H] The man is wearing a purple jacket.

[LABEL] contradiction [PRED] contradiction [COEFF] 26.4157

[P] A woman in a black shirt is eating while another person watches.

[H] The woman is wearing a green dress.

[LABEL] contradiction [PRED] contradiction [COEFF] 25.5089

[P] A woman wears a black hat with an american flag on it and looks at the camera scarily.

[H] A woman is wearing a purple hat.

[LABEL] contradiction [PRED] contradiction [COEFF] 22.8087

[P] On a sidewalk, tall man in a black shirt and a police officer with their backs to the viewer walk past a man in a white t - shirt, black shorts, and sandals.

[H] A tall man is wearing a blue shirt

[LABEL] contradiction [PRED] contradiction [COEFF] 22.7385

[P] A boy on a black surfboard riding the wave on his stomach.

[H] A boy on a yellow surfboard riding the wave on his stomach.

[LABEL] contradiction [PRED] contradiction [COEFF] 22.2771

[P] A man dressed in a black sweater is walking down the street with a woman by his side.

[H] The man is wearing a green t - shirt.

[LABEL] contradiction [PRED] contradiction [COEFF] 21.7032

[P] A man in all black clothing shoveling snow from a sidewalk.

[H] The guy is shoveling the snow outside has blue clothing.

[LABEL] contradiction [PRED] contradiction [COEFF] 21.5338

[P] A lady in a black shimmery dress talking on cellphone.

[H] A lady in a blue shimmery dress talking on cellphone.

[LABEL] contradiction [PRED] contradiction [COEFF] 20.3272

[P] Man with no shirt and woman wearing all black are running in the sand.

[H] The man and woman are wearing yellow.

[LABEL] contradiction [PRED] contradiction [COEFF] 19.7781

[P] An elderly man in a black shirt with glasses painting a picture of a building.

[H] The man has a brown shirt on.

[LABEL] contradiction [PRED] contradiction [COEFF] 18.4958

[P] A group of women wearing all black uniforms play various stringed instruments.

[H] They are wearing white.

[LABEL] contradiction [PRED] contradiction [COEFF] 18.4655

[P] A man with sideburns and a black t - shirt grimaces as he sings into a microphone.

[H] The man is wearing white.

[LABEL] contradiction [PRED] contradiction [COEFF] 18.1581

[P] Two men in a jogging race on a black top street, one man wearing a black top and pants and the other is dressed as a nun with bright red tennis shoes, while onlookers stand in a grassy area and watch from behind a waist high metal railing.

[H] One man is wearing a white top.

[LABEL] contradiction [PRED] contradiction [COEFF] 17.7009

[P] There's a person that's wearing a black jacket and he is also wearing skiing shoes.

[H] A man in white jacket.

[LABEL] contradiction [PRED] contradiction [COEFF] 17.4696

[P] Man in black playing with lion statue's tail.

[H] A man dressed in white standing on a statue

## 1.178 Component 177

[LABEL] neutral [PRED] contradiction [COEFF] 16.8002

[P] Man in a rice field wearing shorts.

[H] A man in a pointing hat is in in a rice field with his dog.

[LABEL] neutral [PRED] contradiction [COEFF] 16.2399

[P] A bald man in white linens plays a musical instrument on a red rug outside.

[H] The man is playing to a snake in a basket.

[LABEL] contradiction [PRED] contradiction [COEFF] 15.0381

[P] A small blond girl wearing a yellow shirt sliding down a yellow slide with her feet in the air.

[H] The small blonde girl was eating ice cream

[LABEL] neutral [PRED] contradiction [COEFF] 14.9570

[P] A middle - age man with a navy shirt and red hat is walking down the sidewalk.

[H] A man is walking his dog

[LABEL] neutral [PRED] contradiction [COEFF] 14.8240

[P] A man wearing glasses looks down and smiles.

[H] The man is looking at a squirrel.

[LABEL] contradiction [PRED] contradiction [COEFF] 12.6644

[P] A man wearing a gray shirt is taking clippings from a large plant.

[H] The man is feeding his dog.

[LABEL] neutral [PRED] contradiction [COEFF] 12.6071

[P] A woman in a printed dress is walking down the street.

[H] A woman is walking her dog

[LABEL] **contradiction** [PRED] **contradiction** [COEFF] 12.5211

[P] A woman with a scarf on her head, looming a rug

[H] The woman is petting a dog.

[LABEL] **contradiction** [PRED] **contradiction** [COEFF] 12.2116

[P] A toddler with orange star sunglasses, sits at the base of the bed as he plays with his toys.

[H] A toddler eats ice cream at the base of a bed.

[LABEL] **contradiction** [PRED] **contradiction** [COEFF] 12.0951

[P] A young child in a white shirt is standing in a field of green grass

[H] A young child eats oreo's.

[LABEL] **neutral** [PRED] **contradiction** [COEFF] 12.0558

[P] A bald man wearing a blue shirt eating.

[H] A man is eating a hot dog.

[LABEL] **contradiction** [PRED] **contradiction** [COEFF] 11.8986

[P] A man wears glasses and pants as shadows are cast in the sun.

[H] A man tries to pet a dog.

[LABEL] **neutral** [PRED] **neutral** [COEFF] 11.7854

[P] A woman with blond - hair, glasses, necklace, and a green and blue floral dress is holding a yellow container.

[H] A woman arrives at a potluck and brings a container of her famous stew.

[LABEL] **neutral** [PRED] **contradiction** [COEFF] 11.5683

[P] A toddler with orange star sunglasses, sits at the base of the bed as he plays with his toys.

[H] A toddler plays with blocks at the base of a bed.

[LABEL] **contradiction** [PRED] **contradiction** [COEFF] 11.5420

[P] A man in a white tank top using a laptop sitting next to a tall pillar with a statue on top of it.

[H] The man is chasing a dog.

[LABEL] **neutral** [PRED] **contradiction** [COEFF] 11.4869

[P] A white women and a black man in a red hat play fighting.

[H] A woman and a man are play fighting with pillows.

## 1.179 Component 178

[LABEL] **entailment** [PRED] **entailment** [COEFF] 40.1371

[P] A man and woman are standing near motorcycles.

[H] Two people are near the motorcycles.

[LABEL] **entailment** [PRED] **entailment** [COEFF] 39.5106

[P] A man wearing a large sombrero walking down the beach with a woman.

[H] Two people are on the beach.

[LABEL] entailment [PRED] entailment [COEFF] 37.0058

[P] A man and a woman are dancing with their hair up.

[H] Two people are dancing.

[LABEL] contradiction [PRED] entailment [COEFF] 36.8016

[P] A man wearing a brown t - shirt is talking to a woman wearing a flowered tank top at an outdoor music concert.

[H] Two men are talking at concert.

[LABEL] entailment [PRED] entailment [COEFF] 36.2941

[P] A woman with a mask sits behind a man on a motorcycle.

[H] Two people sit on a motorcycle.

[LABEL] entailment [PRED] entailment [COEFF] 35.8613

[P] A guy and girl on rocks fishing in a body of water.

[H] Two people are fishing.

[LABEL] entailment [PRED] entailment [COEFF] 34.6813

[P] A boy and girl playing with buckets in a lawn sprinkler

[H] Two kids are playing with water outside.

[LABEL] entailment [PRED] entailment [COEFF] 33.9935

[P] A woman and child watching the construction machines across the road.

[H] Two people are watching the construction.

[LABEL] entailment [PRED] entailment [COEFF] 33.4584

[P] A man and woman stand in front of a large red modern statue.

[H] There are two people in front of a statue.

[LABEL] entailment [PRED] entailment [COEFF] 31.1006

[P] Woman and older man are walking side - by - side on treadmills in a fitness room.

[H] Two people are walking on treadmills.

[LABEL] entailment [PRED] entailment [COEFF] 30.4226

[P] A man and a woman are bending and jumping in front of a truck.

[H] Two people bend and jump.

[LABEL] entailment [PRED] entailment [COEFF] 30.0079

[P] A young boy, wearing an orange shirt, is standing outside, while a man in a green shirt pours mulch from a bag.

[H] Two people are outside.

[LABEL] entailment [PRED] entailment [COEFF] 29.9948

[P] A child and a grownup, each wearing hats, play by the ocean.

[H] Two people play by the ocean.

[LABEL] entailment [PRED] entailment [COEFF] 29.8897

[P] A frowning woman with a green long - sleeved shirt is walking on a busy street, while an also frowning man sporting a mustache and a black jacket walks beside her with his hands in his pockets.

[H] Two people are walking on a street.

[LABEL] entailment [PRED] entailment [COEFF] 29.0245

[P] A child and a grownup, each wearing hats, play by the ocean.

[H] Two people play by the water.

[LABEL] entailment [PRED] entailment [COEFF] 28.4885

[P] A man in a swimming pool holds a smiling boy in a flotation device.

[H] There are two people in a swimming pool.

## 1.180 Component 179

[LABEL] contradiction [PRED] contradiction [COEFF] 12.9428

[P] A group of doctors performing surgery on a patient.

[H] Nobody is performing surgery.

[LABEL] contradiction [PRED] contradiction [COEFF] 11.3667

[P] A group of people gathered on the steps of a building sitting and laying on the steps.

[H] Nobody is gathered

[LABEL] contradiction [PRED] contradiction [COEFF] 11.2943

[P] A busy street has several people all around and bicycles lined up in a row.

[H] The street is empty.

[LABEL] contradiction [PRED] contradiction [COEFF] 11.0865

[P] The people are on the beach viewing the beauty of the ocean using a telescope.

[H] There is no one on the beach.

[LABEL] contradiction [PRED] contradiction [COEFF] 11.0251

[P] The table is set with many types of food.

[H] The table is empty

[LABEL] contradiction [PRED] contradiction [COEFF] 10.9139

[P] People of all ilks on a busy street.

[H] The street is empty

[LABEL] contradiction [PRED] contradiction [COEFF] 10.8373

[P] A sooners football player moves quickly on the field as another player runs.

[H] Nobody is moving.

[LABEL] contradiction [PRED] contradiction [COEFF] 10.0225

[P] A track and field athlete running on a red track in an urban city with many spectators watching.

[H] Nobody is watching.

[LABEL] **contradiction** [PRED] **contradiction** [COEFF] 10.0100

[P] Horrific artwork displayed at the local hipster bar.

[H] The local hipster bar has no artwork.

[LABEL] **contradiction** [PRED] **contradiction** [COEFF] 9.9147

[P] A large crowd is attending an event and taking pictures.

[H] The event is empty.

[LABEL] **contradiction** [PRED] **contradiction** [COEFF] 9.2170

[P] A little boy is running across a crosswalk.

[H] The boy is standing still.

[LABEL] **contradiction** [PRED] **contradiction** [COEFF] 8.8579

[P] A group of protesters in the street waving signs as well as a red flag and a white balloon.

[H] Nobody is protesting

[LABEL] **contradiction** [PRED] **contradiction** [COEFF] 8.7830

[P] People on each side of the street are waiting for the streetlight to change, so they can cross.

[H] Nobody is waiting.

[LABEL] **contradiction** [PRED] **contradiction** [COEFF] 8.6485

[P] A person working on a computer with other equipment with three other individuals in the background talking.

[H] Nobody is on a computer

[LABEL] **contradiction** [PRED] **contradiction** [COEFF] 8.3196

[P] A group of people congregate outside while a man in a black shirt and glasses walks toward the camera.

[H] Nobody is congregating

[LABEL] **contradiction** [PRED] **contradiction** [COEFF] 8.2232

[P] A woman in a shiny dress leaps into air under a yellow and blue banner.

[H] Nobody in clothing.

## 1.181 Component 180

[LABEL] **neutral** [PRED] **neutral** [COEFF] 16.5537

[P] A dog lying asleep outside of a house

[H] The quick brown fox jumps over the lazy sleeping dog.

[LABEL] **neutral** [PRED] **neutral** [COEFF] 16.3117

[P] Some people walk past a large billboard.

[H] Some people walk past a billboard advertising ice cream.

[LABEL] **neutral** [PRED] **neutral** [COEFF] 15.3463

[P] The young girl is running on a sandy beach.

[H] A girl is running on a beach with her dog

[LABEL] **neutral** [PRED] **neutral** [COEFF] 14.4040  
[P] A police officer is putting a leash on a dog.  
[H] Policeman leashing his k9 rescue dog

[LABEL] **neutral** [PRED] **neutral** [COEFF] 13.3032  
[P] A jockey climbs a ramp behind his horse.  
[H] A jockey at the kentucky derby.

[LABEL] **neutral** [PRED] **neutral** [COEFF] 12.9744  
[P] A bmx rider in the middle of a jump as the crowd below watches.  
[H] An asian bmx pro - rider performs a 20 feet jump as the crowd below are amazed.

[LABEL] **neutral** [PRED] **neutral** [COEFF] 12.4097  
[P] A man sits at a table outside.  
[H] A man eating ice cream at a table.

[LABEL] **neutral** [PRED] **neutral** [COEFF] 12.3040  
[P] A female wearing glasses has her head tilted back.  
[H] A little girl is wearing blue glasses.

[LABEL] **contradiction** [PRED] **neutral** [COEFF] 12.0004  
[P] A man riding on a bike with a pile of things in a large wooden crate behind him.  
[H] The man on the bike is wearing a clown costume

[LABEL] **contradiction** [PRED] **neutral** [COEFF] 11.9143  
[P] A man is drawing on the street while another man videotapes it.  
[H] A man videotapes a boy drawing mustaches on street signs.

[LABEL] **neutral** [PRED] **neutral** [COEFF] 11.7570  
[P] A bunchh of people dressed up stand around talking.  
[H] People in halloween costumes talking.

[LABEL] **neutral** [PRED] **neutral** [COEFF] 11.3883  
[P] Group of people standing over a hole with a newly planted tree inside.  
[H] The tree that has been planted was an oak tree.

[LABEL] **neutral** [PRED] **neutral** [COEFF] 11.1427  
[P] An old woman is bent over a table, working with dough.  
[H] An old woman working with pizza dough at a table.

[LABEL] **neutral** [PRED] **neutral** [COEFF] 10.9810  
[P] A man wearing glasses with aluminum cans lined up in front of him.  
[H] A homeless man counts his aluminum cans.

[LABEL] **neutral** [PRED] **neutral** [COEFF] 10.9549  
[P] A man flies through the air on his skateboard above a white staircase.

[H] Tony hawk jumps over a white staircase on his golden skateboard.

[LABEL] **neutral** [PRED] **neutral** [COEFF] 10.9369

[P] A man sitting at a computer working.

[H] Bill gates, the world's best api programmer.

## 1.182 Component 181

[LABEL] **entailment** [PRED] **entailment** [COEFF] 10.2616

[P] A boy in red pants getting ready to slide down a metal slide.

[H] The boy is wearing red pants

[LABEL] **entailment** [PRED] **entailment** [COEFF] 9.5627

[P] An older man sitting against a wall with a guitar in his hands.

[H] The older man is holding a guitar.

[LABEL] **entailment** [PRED] **entailment** [COEFF] 8.2300

[P] A bearded man in a white t - shirt is riding a motorcycle.

[H] The motorcycle is being driven by a bearded man with a white t - shirt.

[LABEL] **entailment** [PRED] **entailment** [COEFF] 7.7935

[P] A boy with a toy red hammer.

[H] The boy has a toy hammer.

[LABEL] **entailment** [PRED] **entailment** [COEFF] 7.7557

[P] A soccer player running on the field.

[H] The soccer player is running.

[LABEL] **entailment** [PRED] **entailment** [COEFF] 7.6424

[P] A young boy is playing baseball.

[H] The boy is playing baseball.

[LABEL] **entailment** [PRED] **entailment** [COEFF] 7.5939

[P] The floor is tiled.

[H] The floor is made of tiles.

[LABEL] **entailment** [PRED] **entailment** [COEFF] 7.2653

[P] A man in a camel colored jacket.

[H] The man is wearing a jacket.

[LABEL] **entailment** [PRED] **entailment** [COEFF] 7.0153

[P] A musical concert with a guitar.

[H] The guitar is the focus of this concert.

[LABEL] **entailment** [PRED] **entailment** [COEFF] 6.8228

[P] A side view picture of 3 band members on stage performing with lead singer in the foreground.



[H] 3 band members perform on stage.

[LABEL] **entailment** [PRED] **entailment** [COEFF] 6.7106

[P] A little girl in traditional chinese garb holds a balloon.

[H] The little girl is dressed in chinese attire.

[LABEL] **entailment** [PRED] **entailment** [COEFF] 6.6818

[P] A rock band playing on stage with the lead guitarist wearing white striped pants and the lead singer in a black shirt and jeans with the bass player in the background.

[H] The band are performing rock music.

[LABEL] **entailment** [PRED] **entailment** [COEFF] 6.4386

[P] Two people race their horses.

[H] The horses compete.

[LABEL] **neutral** [PRED] **entailment** [COEFF] 6.3450

[P] Person with orange backpack, hiking.

[H] The person has hiking gear in his backpack.

[LABEL] **entailment** [PRED] **entailment** [COEFF] 6.2057

[P] A smiling man in glasses wears traditional garb and carries a drum.

[H] The man is holding an instrument.

[LABEL] **entailment** [PRED] **entailment** [COEFF] 6.0650

[P] A man in a blue shirt riding a motorcycle in japan.

[H] The man is wearing a blue shirt.

### 1.183 Component 182

[LABEL] **entailment** [PRED] **contradiction** [COEFF] 91.3932

[P] An asian woman is walking in street, dressed up in green high heels.

[H] A person is outdoors.

[LABEL] **entailment** [PRED] **entailment** [COEFF] 87.0206

[P] A man and woman, both wearing shorts, are walking down a sidewalk.

[H] Two individuals can be seen outdoors.

[LABEL] **entailment** [PRED] **contradiction** [COEFF] 83.8974

[P] People walk through the street following a parade.

[H] People are walking outdoors.

[LABEL] **entailment** [PRED] **contradiction** [COEFF] 81.5149

[P] A man holds multiple flags while standing in a town square.

[H] A man is outdoors.

[LABEL] **entailment** [PRED] **contradiction** [COEFF] 81.3249

[P] Woman holds crying baby while walking down the street with children in face paint.

[H] The woman is walking outdoors.

[LABEL] entailment [PRED] entailment [COEFF] 78.6901

[P] A man in a white outfit covered with red is walking down the street wearing white face paint.

[H] A man outdoors.

[LABEL] entailment [PRED] entailment [COEFF] 75.0918

[P] A man and woman dancing in the sidewalk, both wearing jeans.

[H] The man and woman are outdoors.

[LABEL] entailment [PRED] entailment [COEFF] 74.8837

[P] A group of people in clown makeup perform on the street.

[H] There are humans outdoors.

[LABEL] entailment [PRED] entailment [COEFF] 73.6744

[P] A group of students, all dressed in white shirts, ties and maroon pants, walking down a street.

[H] A group of students outdoors.

[LABEL] entailment [PRED] contradiction [COEFF] 71.8929

[P] A man painted in gold with cycle stands in the street.

[H] A painted man stands outdoors.

[LABEL] entailment [PRED] entailment [COEFF] 71.4426

[P] A young man wearing jeans is walking down a sidewalk with a stack of papers on his head.

[H] There is a man walking outdoors.

[LABEL] entailment [PRED] entailment [COEFF] 70.0520

[P] An african american woman is riding a bicycle down the street.

[H] A female is outdoors.

[LABEL] entailment [PRED] entailment [COEFF] 69.8416

[P] A man in a bike race wearing red and black shorts and shirt pedaling around a corner.

[H] The man is competing outdoors.

[LABEL] entailment [PRED] contradiction [COEFF] 64.6602

[P] The people are walking up the ramp and the man in walking on the road.

[H] People are walking outdoors.

[LABEL] entailment [PRED] entailment [COEFF] 64.2302

[P] Couple kissing outside on street.

[H] There is a couple outdoors.

[LABEL] entailment [PRED] contradiction [COEFF] 63.2510

[P] A man stands on a ladder while in a construction zone.

[H] A man is outdoors.

## 1.184 Component 183

[LABEL] **contradiction** [PRED] **contradiction** [COEFF] 26.6652

[P] A father and daughter throwing rocks into the stream.

[H] The father and daughter are riding a roller - coaster.

[LABEL] **contradiction** [PRED] **contradiction** [COEFF] 21.8941

[P] A female asian clerk working.

[H] A female asian is riding a roller coaster.

[LABEL] **contradiction** [PRED] **contradiction** [COEFF] 17.0480

[P] A man in a trench coat walks down a boardwalk carrying a guitar in its case.

[H] A man is on a rollercoaster.

[LABEL] **contradiction** [PRED] **contradiction** [COEFF] 12.6614

[P] Young man showing his small child how to write.

[H] Man and child are playing catch.

[LABEL] **contradiction** [PRED] **contradiction** [COEFF] 12.5045

[P] Kid in hoodie jumps a ramp.

[H] The kids went iceskating

[LABEL] **contradiction** [PRED] **contradiction** [COEFF] 12.3822

[P] A group of people in the water wearing scuba gear.

[H] People are in a raging fire.

[LABEL] **neutral** [PRED] **contradiction** [COEFF] 12.1555

[P] The attractive young brunette girl in a red bikini jumps into a pool in the backyard.

[H] The girl does a cannonball into the pool.

[LABEL] **contradiction** [PRED] **contradiction** [COEFF] 11.8666

[P] A man in sunglasses working in a carnival booth surrounded with candy and prizes.

[H] A man is riding a roller coaster at a carnival.

[LABEL] **neutral** [PRED] **contradiction** [COEFF] 11.8124

[P] A dog running.

[H] A dog is playing fetcht.

[LABEL] **contradiction** [PRED] **contradiction** [COEFF] 11.7608

[P] A man, dressed in white, plays the piano and sings on stage.

[H] A man is juggling.

[LABEL] **contradiction** [PRED] **contradiction** [COEFF] 10.9157

[P] A man is looking into a telescope.

[H] The man is under water.

[LABEL] **contradiction** [PRED] **contradiction** [COEFF] 10.5958

[P] Stevie wonder is standing in front of musical equipment with a microphone in his hand.

[H] Stevie wonder is crowd surfing.

[LABEL] **contradiction** [PRED] **contradiction** [COEFF] 10.5561

[P] Two ladies are standing in a bedroom at night throwing brightly colored beads out of the window.

[H] The women are dropping bombs on the crowd below.

[LABEL] **contradiction** [PRED] **neutral** [COEFF] 10.2853

[P] A young man sitting behind a table with a microphone in front of him.

[H] A man is on a rollercoaster.

[LABEL] **contradiction** [PRED] **contradiction** [COEFF] 10.2329

[P] Three young girls and two blond women are jumping rope on the beech.

[H] The women are playing checkers.

[LABEL] **contradiction** [PRED] **contradiction** [COEFF] 9.5782

[P] A man getting his photo taken while he is giving a radio interview.

[H] A man is being pulled by himself.

## 1.185 Component 184

[LABEL] **entailment** [PRED] **entailment** [COEFF] 27.4227

[P] A woman smiling while holding a plate of food.

[H] A person is smiling.

[LABEL] **entailment** [PRED] **entailment** [COEFF] 25.2489

[P] An asian woman with reddish blond - hair seated at a computer being helped by what looks like a librarian.

[H] A person sits at a computer.

[LABEL] **entailment** [PRED] **entailment** [COEFF] 25.1488

[P] A blond guy in a green sweatshirt is eating a sandwich.

[H] A person is eating food.

[LABEL] **entailment** [PRED] **entailment** [COEFF] 24.7015

[P] A man in an orange suite is busy at work.

[H] A person is at work.

[LABEL] **entailment** [PRED] **entailment** [COEFF] 24.6894

[P] This man is skiing in the white snow and going through a course of some kind.

[H] A person is skiing in the snow.

[LABEL] **entailment** [PRED] **entailment** [COEFF] 24.1090

[P] A man with glasses is wearing a beer can crocheted hat.

[H] A person is wearing glasses.

[LABEL] entailment [PRED] entailment [COEFF] 24.0357

[P] A man cooking sausage and bacon over an open fire.

[H] A person is making food.

[LABEL] entailment [PRED] entailment [COEFF] 23.4781

[P] A man in a green hat is taking a self portrait.

[H] A person is taking a picture.

[LABEL] entailment [PRED] entailment [COEFF] 23.1489

[P] A man is wearing a rainbow colored necklace and smiling.

[H] A person is smiling.

[LABEL] entailment [PRED] entailment [COEFF] 22.0860

[P] The woman is walking through the snow and trying to light a cigarette.

[H] A person walking

[LABEL] entailment [PRED] entailment [COEFF] 21.7271

[P] A woman in a maroon tennis outfit is on the tennis court and is bouncing the tennis ball on the court floor with her racket.

[H] A person is playing tennis.

[LABEL] entailment [PRED] entailment [COEFF] 21.4572

[P] A bartender wearing a hat is pouring a drink.

[H] A person has a beverage.

[LABEL] entailment [PRED] entailment [COEFF] 20.6909

[P] A young boy with dark hair and skin leaning out of a window of a white bus with green and orange stripes.

[H] A person is leaning

[LABEL] entailment [PRED] entailment [COEFF] 19.5522

[P] A lady in a pink coat, black slacks, and brown shoes is sitting on a bench.

[H] A person is sitting on a bench.

[LABEL] entailment [PRED] entailment [COEFF] 19.5514

[P] A man with a hat walks along train tracks.

[H] A person is following tracks.

[LABEL] entailment [PRED] entailment [COEFF] 19.0891

[P] A shirtless man wades in smooth blue water.

[H] A person is in the water.

## 1.186 Component 185

[LABEL] neutral [PRED] entailment [COEFF] 11.8071

[P] A man leans against a tree with a beer in hand.

[H] A man has a beer

[LABEL] entailment [PRED] entailment [COEFF] 10.7439

[P] A woman is sitting down with her bag.

[H] A woman has a bag.

[LABEL] entailment [PRED] entailment [COEFF] 10.1825

[P] A dog with a red harness tracks a scent in a field.

[H] The dog has a harness.

[LABEL] entailment [PRED] entailment [COEFF] 9.8638

[P] A dog running with something in its mouth

[H] A dog has something in its mouth

[LABEL] entailment [PRED] entailment [COEFF] 9.8439

[P] A man offers his phone across the table.

[H] A man has a phone

[LABEL] entailment [PRED] entailment [COEFF] 9.5311

[P] A closeup of a small black and white dog with a baseball in its mouth.

[H] A small dog has a baseball.

[LABEL] entailment [PRED] entailment [COEFF] 8.6587

[P] An old woman is holding a hammer wrapped in bubble wrap.

[H] A woman has a hammer.

[LABEL] entailment [PRED] entailment [COEFF] 8.5958

[P] A group of people look toward a man holding a ladder against a tree.

[H] A man has a ladder.

[LABEL] entailment [PRED] entailment [COEFF] 8.4999

[P] A man wearing a backpack looking to the side.

[H] Someone has a backpack.

[LABEL] entailment [PRED] entailment [COEFF] 8.3966

[P] A small boy wearing a diaper stands near the door and is covered in marker.

[H] A boy had a marker.

[LABEL] entailment [PRED] entailment [COEFF] 8.2163

[P] A man with a suit and mask on.

[H] A man has a mask on.

[LABEL] entailment [PRED] entailment [COEFF] 8.0032

[P] A woman wearing black is balancing a fishbowl on her head.

[H] The woman has a fishbowl on her head.

[LABEL] entailment [PRED] entailment [COEFF] 7.8632

[P] A child on a scooter is jumping the curb.

[H] A child has a scooter.

[LABEL] **entailment** [PRED] **entailment** [COEFF] 7.7766

[P] A woman is dressed in asian garb with a basket of goods on her hip.

[H] A woman has a basket of goods on her hip.

[LABEL] **entailment** [PRED] **entailment** [COEFF] 7.5993

[P] A woman is sitting on a stool and playing a guitar with a smile on her face.

[H] A woman has a guitar.

[LABEL] **entailment** [PRED] **entailment** [COEFF] 7.5015

[P] A man holding a lighted candle with his head leaning on a statue.

[H] A man has a candle.

### 1.187 Component 186

[LABEL] **contradiction** [PRED] **contradiction** [COEFF] 25.5863

[P] Woman in a red sari walks down the street.

[H] The woman is wearing blue.

[LABEL] **contradiction** [PRED] **contradiction** [COEFF] 22.2811

[P] A girl in a pink dress is standing on her head.

[H] A girl is wearing a red dress

[LABEL] **contradiction** [PRED] **contradiction** [COEFF] 21.8635

[P] A scruffy african - american man with a green hat stands outdoors.

[H] The man is wearing a red hat.

[LABEL] **contradiction** [PRED] **contradiction** [COEFF] 19.6813

[P] A little boy in a green shirt holds a blue umbrella in front of a doorway framed by orange signs with asian writing on them.

[H] The shirt is red.

[LABEL] **contradiction** [PRED] **contradiction** [COEFF] 19.2657

[P] A girl with a large pink bow in her hair puts herbs into a clear plastic bag at a market.

[H] The girl is wearing a white bow

[LABEL] **contradiction** [PRED] **contradiction** [COEFF] 19.2552

[P] A man in an orange shirt and a woman in a red and black polka - dotted dress walk past a graffiti - decorated brick wall.

[H] The man and women walk past a white wall.

[LABEL] **contradiction** [PRED] **contradiction** [COEFF] 18.9260

[P] An old man in white and pink is playing an acoustic guitar by a red bucket of money and a stand of red tomatoes.

[H] The man is playing an instrument next to a stand of oranges.

[LABEL] contradiction [PRED] contradiction [COEFF] 18.6024

[P] A fluffy white dog is coming out of a blue striped obstacle shute.

[H] The dog is black.

[LABEL] contradiction [PRED] contradiction [COEFF] 18.5206

[P] The man in the green shirt is looking up.

[H] The person is in a red shirt.

[LABEL] contradiction [PRED] contradiction [COEFF] 18.2837

[P] A girl wearing pink walks by a mural of a girl with pink hair.

[H] A girl is wearing black.

[LABEL] contradiction [PRED] contradiction [COEFF] 17.9275

[P] Lady standing in front of a building with a green construction hat.

[H] The lady standing in front of the building has a purple construction hat.

[LABEL] contradiction [PRED] contradiction [COEFF] 17.4123

[P] A girl in a green shirt taking a careful look at an item.

[H] The shirt is red.

[LABEL] contradiction [PRED] contradiction [COEFF] 17.0682

[P] Two girls wearing red jerseys, each with long light brown hair, sit in the stands.

[H] Two girls are wearing blue jerseys

[LABEL] contradiction [PRED] contradiction [COEFF] 17.0154

[P] In a public area, a young girl in a pink dress sits next to an older woman who works a primitive device to make brown thread.

[H] A young girl is wearing a red dress.

[LABEL] contradiction [PRED] contradiction [COEFF] 16.8693

[P] A man with a red hat is playing the drums.

[H] A man playing the drums wore a blue hat.

[LABEL] contradiction [PRED] contradiction [COEFF] 16.5402

[P] A young boy in a green shirt smiles and is standing by three men.

[H] The young boy is wearing a brown shirt.

## 1.188 Component 187

[LABEL] entailment [PRED] entailment [COEFF] 10.9965

[P] A man under colorful stage lights playing a guitar.

[H] A man plays a guitar.

[LABEL] entailment [PRED] entailment [COEFF] 8.6566

[P] A seated woman reading a newspaper on a subway platform.

[H] A woman reads a newspaper.



[LABEL] entailment [PRED] entailment [COEFF] 8.5554  
[P] A man with gray hair playing the drums.  
[H] A man plays the drums.

[LABEL] entailment [PRED] entailment [COEFF] 6.9725  
[P] A woman is making a funny face while playing a board game.  
[H] A woman plays a board game.

[LABEL] entailment [PRED] entailment [COEFF] 6.8925  
[P] A woman dressed in red, is eating fruit at a fruit stand.  
[H] A woman eats fruit

[LABEL] entailment [PRED] entailment [COEFF] 6.8065  
[P] A man enjoys a drink while sitting in a brown chair.  
[H] A man drinks.

[LABEL] entailment [PRED] entailment [COEFF] 6.7460  
[P] A woman in a white shirt is wearing goggles.  
[H] A woman wears goggles.

[LABEL] entailment [PRED] entailment [COEFF] 6.6504  
[P] A black man wearing a black shirt with yellow leaves on it, is sitting and drinking a cup of coffee.  
[H] A man drinks coffee

[LABEL] entailment [PRED] entailment [COEFF] 6.6223  
[P] A little girl in a pink shirt is blowing bubbles.  
[H] A girl blows bubbles.

[LABEL] entailment [PRED] entailment [COEFF] 6.5820  
[P] A man in black clothing plays electric guitar on stage.  
[H] A man plays electric guitar

[LABEL] entailment [PRED] entailment [COEFF] 6.4327  
[P] A man in a blue shirt is standing outside smoking a cigarette.  
[H] A man smokes a cigarette outside.

[LABEL] entailment [PRED] entailment [COEFF] 6.1976  
[P] A woman with a black belt is doing some form of martial arts.  
[H] A woman does martial arts.

[LABEL] entailment [PRED] entailment [COEFF] 6.1376  
[P] An older man is wearing all tan and playing on a drum.  
[H] An old man plays the drum.

[LABEL] entailment [PRED] entailment [COEFF] 6.1295  
[P] A restaurant worker in an apron preparing waffle cones.

[H] A worker makes cones.

[LABEL] **entailment** [PRED] **entailment** [COEFF] 5.7517

[P] People in a convention center playing twister.

[H] People play twister.

[LABEL] **entailment** [PRED] **entailment** [COEFF] 5.7258

[P] A man eats food on a table in front of a small food shop on the street while a passerby walks by.

[H] A man eats food.

## 1.189 Component 188

[LABEL] **neutral** [PRED] **entailment** [COEFF] 6.5574

[P] A man is looking at the moon throw a telescope at dusk.

[H] A man focuses on the moon.

[LABEL] **entailment** [PRED] **entailment** [COEFF] 6.0696

[P] A woman in a brown strip is taking a swing with a baseball bat at a yellow ball, whilst another woman is waiting on the sideline.

[H] Someone is swinging a bat.

[LABEL] **entailment** [PRED] **entailment** [COEFF] 5.7208

[P] A man eats food on a table in front of a small food shop on the street while a passerby walks by.

[H] A man eats food.

[LABEL] **entailment** [PRED] **entailment** [COEFF] 5.3972

[P] A shirtless man wearing sunglasses and yellow shorts is making a heart with his fingers.

[H] A man making a heart with his fingers.

[LABEL] **entailment** [PRED] **entailment** [COEFF] 5.3583

[P] A child looking at a street performer who has a camera and is covered in gold paint.

[H] A child looking.

[LABEL] **entailment** [PRED] **entailment** [COEFF] 5.3001

[P] A man working on a steam engine with a water tower in the background.

[H] A person working

[LABEL] **entailment** [PRED] **entailment** [COEFF] 5.2400

[P] Black woman with her baby tied to her back writing on a chalkboard.

[H] The black woman has a baby.

[LABEL] **entailment** [PRED] **entailment** [COEFF] 5.1195

[P] A man with glasses is reading a book while lying in a red, orange and yellow striped hammock next to a sidewalk.

[H] A person reading

[LABEL] **entailment** [PRED] **entailment** [COEFF] 4.8200

[P] A man in jeans standing on the sidewalk, holding a motorcycle helmet, looking towards the road.  
[H] A man is looking at the road.

[LABEL] **entailment** [PRED] **entailment** [COEFF] 4.8015

[P] A heavyset woman in a red shirt and black shoulder straps balances a blue container filled with goods on top of her head.  
[H] A woman balances goods on her head.

[LABEL] **entailment** [PRED] **entailment** [COEFF] 4.7833

[P] A blond woman wearing a helmet, gray jacket, black pants, and a purse, stands on her motorbike in a parking lot.  
[H] There is a woman on a motorbike.

[LABEL] **entailment** [PRED] **entailment** [COEFF] 4.7174

[P] Looking through a set of bars, we see a man in a jacket sitting on a bench ; he looks at a piece of paper.  
[H] A man is sitting on a bench.

[LABEL] **entailment** [PRED] **entailment** [COEFF] 4.6135

[P] There is a man using an atm machine, while a man sleeps on the ground next to him.  
[H] There are men by an atm.

[LABEL] **entailment** [PRED] **entailment** [COEFF] 4.5497

[P] A person wearing glasses sits on a train as they read a book.  
[H] The person is on a train.

[LABEL] **entailment** [PRED] **entailment** [COEFF] 4.4634

[P] A man and a woman look at the sky while the man smokes a cigarette.  
[H] The people are looking at the sky.

[LABEL] **entailment** [PRED] **entailment** [COEFF] 4.4184

[P] A girl with a towel wrapped around her head looking into the camera.  
[H] Girl looks at camera

## 1.190 Component 189

[LABEL] **entailment** [PRED] **neutral** [COEFF] 26.7360

[P] Two men and a woman sit in front of a tree and have a snack.  
[H] People are having a picnic.

[LABEL] **entailment** [PRED] **entailment** [COEFF] 25.9039

[P] A little girl flipping her pancake over.  
[H] A little girl with her breakfast.

[LABEL] **entailment** [PRED] **contradiction** [COEFF] 22.9478

[P] A man wearing a safety jacket is in the cockpit of an airplane.  
[H] A man wearing a safety vest.

[LABEL] **neutral** [PRED] **contradiction** [COEFF] 22.6711  
[P] An asian bicycling food salesman waits at crosswalk.  
[H] The food salesman is on a bike en route to a delivery.

[LABEL] **contradiction** [PRED] **contradiction** [COEFF] 22.5935  
[P] A younger woman and older man run on treadmills.  
[H] Two people are working out on an elliptical.

[LABEL] **entailment** [PRED] **entailment** [COEFF] 22.5549  
[P] A bicyclist does maneuvers  
[H] Someone is riding a bike.

[LABEL] **neutral** [PRED] **contradiction** [COEFF] 21.5974  
[P] A man in a black is putting honey on something.  
[H] The man is holding a spoon.

[LABEL] **neutral** [PRED] **contradiction** [COEFF] 21.3243  
[P] A young girl with red - hair is playing on a sidewalk with a swan.  
[H] A girl with a pony tail is playing outside.

[LABEL] **neutral** [PRED] **entailment** [COEFF] 20.0380  
[P] Two dogs in a kennel on their hind legs facing one another.  
[H] Two poodles are facing each other.

[LABEL] **neutral** [PRED] **entailment** [COEFF] 19.5861  
[P] A girl toddler is sitting on the grass.  
[H] A child is having a picnic.

[LABEL] **contradiction** [PRED] **entailment** [COEFF] 19.5772  
[P] A small, smiling boy in a blue safety helmet and yellow shirt is riding his scooter on a sidewalk.  
[H] The small smiling boy is riding his bicycle.

[LABEL] **entailment** [PRED] **entailment** [COEFF] 19.4861  
[P] A man in a blue speedo holding swim goggles.  
[H] A man in a bathing suit

[LABEL] **contradiction** [PRED] **contradiction** [COEFF] 19.2457  
[P] Three children play on corn stacks.  
[H] Three children play on hay bales.

[LABEL] **neutral** [PRED] **neutral** [COEFF] 19.2207  
[P] A social event taking place in the grass.  
[H] A company picnic in a park.

[LABEL] **contradiction** [PRED] **contradiction** [COEFF] 19.1648  
[P] People are gathered around watching children with a pig.

[H] A person is watching a child with a cow.

[LABEL] **neutral** [PRED] **contradiction** [COEFF] 19.1353

[P] A female basketball player in a white uniform is shooting a free throw.

[H] Basket ball player shotted a goal.

## 1.191 Component 190

[LABEL] **neutral** [PRED] **neutral** [COEFF] 26.6229

[P] A group of people are on a boat in a marina.

[H] A group of women are on a boat.

[LABEL] **entailment** [PRED] **neutral** [COEFF] 24.9164

[P] A woman walks holding a ferret with a dog behind her.

[H] Nancy was holding her ferret with her dog walking behind her.

[LABEL] **neutral** [PRED] **neutral** [COEFF] 24.2371

[P] Two people are sitting at work stations.

[H] The women are sitting at work stations.

[LABEL] **neutral** [PRED] **neutral** [COEFF] 23.9041

[P] A skier is riding skis along a tree lined trail.

[H] A woman is skiing along the trail.

[LABEL] **neutral** [PRED] **neutral** [COEFF] 23.8498

[P] Two woman with white head coverings are gazing at a cellphone.

[H] Two nuns with white head coverings are gazing at a cellphone.

[LABEL] **neutral** [PRED] **neutral** [COEFF] 23.5138

[P] Several people are sitting on a park bench at the playground.

[H] A group of men are sitting by a playground.

[LABEL] **neutral** [PRED] **neutral** [COEFF] 23.2956

[P] A person on a waterski.

[H] A woman waterskiing.

[LABEL] **neutral** [PRED] **neutral** [COEFF] 23.0761

[P] Two people occupy a small boat in a river with a cityscape in the background.

[H] Two women are drifting down a river with a city behind them.

[LABEL] **neutral** [PRED] **neutral** [COEFF] 22.8182

[P] A person surfing a wave.

[H] A young child surfing in the ocean.

[LABEL] **neutral** [PRED] **neutral** [COEFF] 22.5816

[P] Two people are riding motorcycle in a race.

[H] Two brothers racing motorcycles.

[LABEL] **neutral** [PRED] **neutral** [COEFF] 21.2318

[P] Someone is looking at the memorial statue for the crew of yukla 27

[H] There is a statue with a woman looking at it.

[LABEL] **neutral** [PRED] **neutral** [COEFF] 21.1463

[P] Three people on atv's outside.

[H] Three girls are on atvs.

[LABEL] **neutral** [PRED] **neutral** [COEFF] 21.0100

[P] Three people are viewing an art exhibit.

[H] Three young boys view an art exhibit.

[LABEL] **neutral** [PRED] **neutral** [COEFF] 20.3649

[P] A person in pink pants playing a guitar

[H] A girl is rehearsing for guitar practice.

[LABEL] **neutral** [PRED] **neutral** [COEFF] 20.1180

[P] Two people are sitting on a bench looking at a well - lit building.

[H] A young couple is sitting down on a bench

[LABEL] **neutral** [PRED] **neutral** [COEFF] 20.1048

[P] Two people are standing in shallow water, waving sparklers around

[H] Billie and tom were in the stream with sparklers in their hands.

## 1.192 Component 191

[LABEL] **contradiction** [PRED] **contradiction** [COEFF] 72.7389

[P] A hooded man lovingly holding a woman's face

[H] The man is alone.

[LABEL] **contradiction** [PRED] **contradiction** [COEFF] 71.4268

[P] A graduate student in a crowd of classmates shaking an older man's hand.

[H] The student is alone.

[LABEL] **contradiction** [PRED] **contradiction** [COEFF] 65.8751

[P] A girl in the background takes a picture as many people busily walk by.

[H] The girl is alone

[LABEL] **contradiction** [PRED] **contradiction** [COEFF] 63.4852

[P] A little boy quickly pushes another child on a riding toy.

[H] The little boy is alone

[LABEL] **contradiction** [PRED] **contradiction** [COEFF] 59.0196

[P] The little girl is being swung around by her arms.

[H] The girl is alone.

[LABEL] contradiction [PRED] contradiction [COEFF] 55.8817

[P] A little girl with her mom are looking at desserts.

[H] The little girl is alone

[LABEL] contradiction [PRED] contradiction [COEFF] 54.4966

[P] A young man runs with goggles above his eyes and a bungee cord tethered to him as a man on a bicycle with a white helmet laughs.

[H] The young man is alone.

[LABEL] contradiction [PRED] contradiction [COEFF] 49.8305

[P] A child stand with an elderly women at the 96th street subway station.

[H] The child is alone.

[LABEL] contradiction [PRED] contradiction [COEFF] 49.1449

[P] A woman is driving her car with two dogs in the backseat.

[H] The woman is alone in her car.

[LABEL] contradiction [PRED] contradiction [COEFF] 49.0544

[P] In a public area, a young girl in a pink dress sits next to an older woman who works a primitive device to make brown thread.

[H] The young girl is completely alone.

[LABEL] contradiction [PRED] contradiction [COEFF] 48.0751

[P] Two men with a hand on each other's back and one man is looking up.

[H] The man is alone in the bathroom.

[LABEL] contradiction [PRED] contradiction [COEFF] 47.7881

[P] A little girl with blond - hair, a yellow shirt, and a yellow cup is looking at a mirror with a woman wearing a yellow shit and red shorts behind her.

[H] The little girl is alone.

[LABEL] contradiction [PRED] contradiction [COEFF] 43.0008

[P] A woman clothed in a top and flowing white skirt is caught mid leap while dancing in a near a fountain.

[H] A woman is alone inside the building.

[LABEL] entailment [PRED] contradiction [COEFF] 42.9251

[P] A kid playing in the playground

[H] A kid is alone.

[LABEL] contradiction [PRED] contradiction [COEFF] 41.9077

[P] A woman is showing her art to people.

[H] The woman is alone in her house.

[LABEL] contradiction [PRED] contradiction [COEFF] 41.4341

[P] A man in a yellow jackets talks to a girl in a pink blouse and dark skirt.

[H] The girl is alone

### 1.193 Component 192

[LABEL] **neutral** [PRED] **neutral** [COEFF] 18.2764

[P] A man wearing a raincoat and a white hat is sweeping outside on wet brick floors.

[H] An old man is sweeping outside on the wet brick floors while wearing a raincoat and a hat.

[LABEL] **neutral** [PRED] **neutral** [COEFF] 15.8867

[P] A blond woman pours a glass of wine in a dim restaurant.

[H] A blond woman pours a glass of wine in a dim, cold restaurant.

[LABEL] **neutral** [PRED] **neutral** [COEFF] 15.7751

[P] A black, brown, and tan dog jumps at the camera.

[H] A black, brown, and tan dog jumps at the big camera.

[LABEL] **neutral** [PRED] **neutral** [COEFF] 15.0729

[P] A wet dog is jumping through some water on a beach.

[H] A large wet dog is jumping through some water on a beach.

[LABEL] **neutral** [PRED] **neutral** [COEFF] 14.4844

[P] A rock band with a female vocalist performs in the street with a white van in the background.

[H] There is a popular rock band with a female vocalist performing in the street.

[LABEL] **neutral** [PRED] **entailment** [COEFF] 14.1386

[P] A skateboarder in a red baseball cap, black shirt and tan shorts skates alone in a wide open space.

[H] A skateboarder has a small red baseball cap.

[LABEL] **neutral** [PRED] **neutral** [COEFF] 13.8994

[P] A man leans against a table.

[H] A man is leaning against a table for support.

[LABEL] **neutral** [PRED] **neutral** [COEFF] 13.7202

[P] A border collie is outside jumping over an obstacle.

[H] A border collie is outside jumping over a big obstacle.

[LABEL] **neutral** [PRED] **neutral** [COEFF] 13.5047

[P] A woman is drinking her coffee.

[H] A woman drinks coffee from a mug.

[LABEL] **neutral** [PRED] **entailment** [COEFF] 13.4846

[P] An older man in a red sweatshirt stands in front of a group of children sitting on benches in front of him.

[H] An older man in a light red sweatshirt stands.

[LABEL] **neutral** [PRED] **neutral** [COEFF] 13.4001



[P] A woman in a green tank top runs outside on a road.

[H] A woman in a green tank top runs very fast outside on a road.

[LABEL] **neutral** [PRED] **neutral** [COEFF] 13.1450

[P] A bald man with a beard is playing a saxophone in a dimly - lit room, with pictures on the wall behind him.

[H] A bald man has a white beard.

[LABEL] **neutral** [PRED] **neutral** [COEFF] 12.9608

[P] Shirtless men hike through a canyon.

[H] Man hikes through a massive canyon.

[LABEL] **neutral** [PRED] **neutral** [COEFF] 12.9140

[P] A young man wearing a white glove standing on the side of a road. an o

[H] A young man wearing a white glove standing on the side of a dirt road.

[LABEL] **neutral** [PRED] **neutral** [COEFF] 12.8595

[P] A bald guy wearing a black t - shirt plays the guitar.

[H] A bald man wearing a black t - shirt plays his guitar on stage.

[LABEL] **neutral** [PRED] **neutral** [COEFF] 12.5928

[P] Two small children stand by a snack.

[H] Two small children stand by a yummy snack.

## 1.194 Component 193

[LABEL] **contradiction** [PRED] **contradiction** [COEFF] 14.5851

[P] Two men are standing behind a pile of buckets.

[H] Men in front of a store in the mall.

[LABEL] **contradiction** [PRED] **contradiction** [COEFF] 13.4650

[P] A man in a yellow shirt and jeans is smiling while running through an outdoor water fountain.

[H] The man is running toward a store in a shopping mall.

[LABEL] **contradiction** [PRED] **contradiction** [COEFF] 10.1819

[P] A man in a military - type uniform is standing in the street listening to another man who has a piece of paper in his hands.

[H] The man is inside a movie theater.

[LABEL] **neutral** [PRED] **contradiction** [COEFF] 10.1599

[P] A woman in an orange dress walking across a stone bridge with a very blue sky behind her.

[H] A woman is walking to the store.

[LABEL] **contradiction** [PRED] **contradiction** [COEFF] 9.9781

[P] Two men are sleeping on makeshift beds on the side of a cliff.

[H] Two men are staying in a hotel.

[LABEL] contradiction [PRED] contradiction [COEFF] 9.8491  
[P] A woman in a blue shirt, covered with a blanket is sitting on the couch.  
[H] A woman is eating a donut at the store.

[LABEL] contradiction [PRED] contradiction [COEFF] 9.7565  
[P] Four men standing near a yellow car.  
[H] Four men are sitting in a restaurant.

[LABEL] contradiction [PRED] contradiction [COEFF] 9.4209  
[P] A man placing meat on a grill.  
[H] A man is at the grocery store.

[LABEL] contradiction [PRED] contradiction [COEFF] 9.1866  
[P] A seated man is repairing a fishing net.  
[H] A man is standing in line at the grocery store.

[LABEL] contradiction [PRED] contradiction [COEFF] 9.0740  
[P] Woman sitting alone with drink on a bench as people walk by.  
[H] A person standing at a cafe drinking coffee.

[LABEL] contradiction [PRED] contradiction [COEFF] 8.9751  
[P] A man wearing a hat is holding his arm strait out and looking at his hand while standing in front of the edge of the ocean on a beach.  
[H] The man is alone in the high school cafeteria.

[LABEL] contradiction [PRED] contradiction [COEFF] 8.7288  
[P] A man and a boy posing together behind a fence and a gorgeous waterfall view.  
[H] The people are in a hotel.

[LABEL] contradiction [PRED] contradiction [COEFF] 8.7197  
[P] A crowd of women dressed in colorful saris are sitting in muddy water while one of them washes with water.  
[H] The women are in a kitchen.

[LABEL] contradiction [PRED] contradiction [COEFF] 8.4217  
[P] Three women wearing blue walk along a sidewalk while laughing and smiling.  
[H] Women are fighting inside a restaurant.

[LABEL] contradiction [PRED] contradiction [COEFF] 8.3501  
[P] A woman sits on a crate by her baskets of fruit.  
[H] A woman is standing at a market.

[LABEL] contradiction [PRED] contradiction [COEFF] 8.1886  
[P] A woman sits at an outdoor cafe table with really big blond - hair.  
[H] A woman is watching a movie at the theater.

## 1.195 Component 194

[LABEL] entailment [PRED] entailment [COEFF] 38.3189

[P] One basketball player wearing a white jersey trying to pass the basketball into bounds while the other team blocks him.

[H] Some basketball players play a game.

[LABEL] entailment [PRED] entailment [COEFF] 30.7536

[P] Two men in red and blue t - shirts are playing soccer, with the one in blue shirt trying to snatch the ball from the one in red shirt.

[H] Some people are playing sports.

[LABEL] entailment [PRED] entailment [COEFF] 27.0315

[P] A woman in a blue striped shirt helps her child in a multicolor striped shirt on a brown horse on the carousel.

[H] Some people are on a carousel.

[LABEL] entailment [PRED] entailment [COEFF] 21.5148

[P] Three girls in gold 'native american' costumes dance on a football field while several young men in dark blue uniforms play drums behind them.

[H] Some people dance and play music.

[LABEL] neutral [PRED] entailment [COEFF] 19.3336

[P] A girl with long, brown hair throws a softball, while members of the opposing softball team run the bases around her.

[H] Some children are competing at softball.

[LABEL] entailment [PRED] entailment [COEFF] 19.2507

[P] Street musicians playing two guitars and drums, playing on a tiled floor.

[H] Several musicians are playing music.

[LABEL] entailment [PRED] entailment [COEFF] 18.3758

[P] Young women playing a intense game of lacrosse.

[H] Some women play a sport

[LABEL] entailment [PRED] entailment [COEFF] 17.5504

[P] Multicolored wearing cyclists, meticulously look around a corner as they make they turn on a closed off road.

[H] Some people are cycling.

[LABEL] entailment [PRED] entailment [COEFF] 17.2959

[P] A woman in bright orange dress dances with man

[H] Some people are dancing.

[LABEL] entailment [PRED] entailment [COEFF] 17.1778

[P] The spotlight is on a guitarist who is playing in a band.

[H] Some people are performing.

[LABEL] entailment [PRED] entailment [COEFF] 17.1623

[P] Four women in red bathing suits are performing a synchronized swimming routine in front of an audience.  
[H] Some women are doing synchronized swimming.

[LABEL] **entailment** [PRED] **entailment** [COEFF] 17.0466

[P] A team of girl soccer players are running down the field chasing the ball.  
[H] Some girls are playing soccer.

[LABEL] **entailment** [PRED] **entailment** [COEFF] 17.0227

[P] A young man shows off his karate moves to his friend.  
[H] People practicing martial arts.

[LABEL] **entailment** [PRED] **entailment** [COEFF] 16.3767

[P] A basketball player is protecting the basketball with many other players nearby.  
[H] Some people are playing basketball.

[LABEL] **entailment** [PRED] **entailment** [COEFF] 15.8589

[P] Two girls dressed like waitresses dance along with a man dressed as a chef.  
[H] Some people are dancing

[LABEL] **entailment** [PRED] **entailment** [COEFF] 14.3731

[P] Four women playing hockey fight over a puck.  
[H] Several people are playing a sport.

## 1.196 Component 195

[LABEL] **entailment** [PRED] **entailment** [COEFF] 12.7500

[P] A woman on a city street waving at a bus.  
[H] The woman is waving at the bus.

[LABEL] **entailment** [PRED] **entailment** [COEFF] 12.5338

[P] An old woman prepares food with a rolling pin.  
[H] An old woman is using her rolling pin to prepare food.

[LABEL] **neutral** [PRED] **entailment** [COEFF] 11.6113

[P] A man making a balloon creation.  
[H] A man is making a balloon

[LABEL] **entailment** [PRED] **entailment** [COEFF] 11.1120

[P] This boy is cycling to market to get vegetables.  
[H] The boy cycled to the market.

[LABEL] **entailment** [PRED] **entailment** [COEFF] 10.6879

[P] Girl in pink shirt blowing bubbles.  
[H] The girl is blowing bubbles while wearing a pink shirt.

[LABEL] **entailment** [PRED] **entailment** [COEFF] 10.6146

[P] A student uses old planer to work wood in a shop.

[H] A student is working in a wood shop.

[LABEL] **entailment** [PRED] **entailment** [COEFF] 10.6034

[P] A boy performs a stunt on a skateboard in a skate park.

[H] The boy is at the skate park.

[LABEL] **entailment** [PRED] **entailment** [COEFF] 10.5312

[P] A jeep gets wheel high in mud.

[H] The jeep is in the mud.

[LABEL] **entailment** [PRED] **entailment** [COEFF] 10.5175

[P] There is a chocolate brown dog running in water.

[H] The brown dog is running in water.

[LABEL] **entailment** [PRED] **entailment** [COEFF] 10.4200

[P] A special of the day board at a restaurant.

[H] The restaurant had the specials on the board.

[LABEL] **entailment** [PRED] **entailment** [COEFF] 10.4164

[P] Several dogs wearing muzzles are racing on a track.

[H] The dogs are wearing muzzles on the track.

[LABEL] **entailment** [PRED] **entailment** [COEFF] 10.2324

[P] Street side concession stand worker icing cupcakes for customers.

[H] The worker is icing cupcakes.

[LABEL] **entailment** [PRED] **entailment** [COEFF] 10.1538

[P] People working together with fish set on the tables.

[H] The fish are on the tables.

[LABEL] **entailment** [PRED] **entailment** [COEFF] 10.1526

[P] Hands with painted fingernails unscrewing nail polish.

[H] They are painting their nails.

[LABEL] **entailment** [PRED] **entailment** [COEFF] 10.1143

[P] A player tackling his opponent in a game of rugby.

[H] A player is tackling his opponent

[LABEL] **entailment** [PRED] **entailment** [COEFF] 10.0326

[P] City workers doing repairs.

[H] The workers are making repairs.

## 1.197 Component 196

[LABEL] **contradiction** [PRED] **contradiction** [COEFF] 15.6198

[P] A young man plays with a very young baby.

[H] The man is walking a dog.

[LABEL] **contradiction** [PRED] **contradiction** [COEFF] 15.4915

[P] A woman is drawing a caricature of a young boy.

[H] The woman is drawing a picture of a dog.

[LABEL] **contradiction** [PRED] **contradiction** [COEFF] 15.4342

[P] A street shot of people in an asian country.

[H] A street shot of dogs in an asian country.

[LABEL] **contradiction** [PRED] **contradiction** [COEFF] 14.8404

[P] A man and two small children together in a pool.

[H] A man and a dog are taking a walk.

[LABEL] **contradiction** [PRED] **contradiction** [COEFF] 14.2427

[P] A bug sits on a girls finger while she looks shocked.

[H] The girl is playing with a dog

[LABEL] **contradiction** [PRED] **contradiction** [COEFF] 12.3272

[P] A group of people washing a truck.

[H] The people are washing a dog.

[LABEL] **entailment** [PRED] **contradiction** [COEFF] 12.2087

[P] Man pulling a cart in the street.

[H] A man pulls a cat outside on the street.

[LABEL] **contradiction** [PRED] **contradiction** [COEFF] 12.1727

[P] A group of people working to package the drink.

[H] A group of dogs working to package the food.

[LABEL] **contradiction** [PRED] **contradiction** [COEFF] 12.0703

[P] A mother and two children are posing with funny faces.

[H] A mother and her two dogs are playing catch.

[LABEL] **contradiction** [PRED] **contradiction** [COEFF] 12.0108

[P] A young mormon man walking with his bike downtown.

[H] A young man walks his dog in the park

[LABEL] **contradiction** [PRED] **contradiction** [COEFF] 11.6510

[P] A blond child swims.

[H] There is a group of dogs swimming.

[LABEL] **contradiction** [PRED] **contradiction** [COEFF] 11.6496

[P] A woman in a hat carrying several baskets and a child wearing a blue hat by her back.

[H] A woman carries a small goat on her back.

[LABEL] **contradiction** [PRED] **contradiction** [COEFF] 11.5384  
[P] A woman sits under a picture of jesus with the light streaming through the window.  
[H] The picture is of a dog, with a woman next to it.

[LABEL] **contradiction** [PRED] **contradiction** [COEFF] 11.4274  
[P] A hockey player guards the goal.  
[H] A dog guards the goal.

[LABEL] **neutral** [PRED] **contradiction** [COEFF] 11.4272  
[P] A woman in a printed dress is walking down the street.  
[H] A woman is walking her dog

[LABEL] **contradiction** [PRED] **contradiction** [COEFF] 11.4137  
[P] A guy shaving his facial hair in the restroom.  
[H] A guy is shaving his dog's hair.

### 1.198 Component 197

[LABEL] **neutral** [PRED] **neutral** [COEFF] 62.5570  
[P] A man is outside sitting next to a tree and bushes.  
[H] A man is enjoying the day.

[LABEL] **neutral** [PRED] **neutral** [COEFF] 53.0960  
[P] People sitting at and walking around out front of a sweets cafe.  
[H] Many people enjoy the sunshine on the patio of a sweets cafe.

[LABEL] **neutral** [PRED] **neutral** [COEFF] 43.7483  
[P] A person walks in the valley between tall mountains.  
[H] Enjoying the view of nature.

[LABEL] **neutral** [PRED] **neutral** [COEFF] 42.0566  
[P] Three people stand at the top of an outdoor staircase.  
[H] Three people are admiring the view.

[LABEL] **neutral** [PRED] **neutral** [COEFF] 41.5677  
[P] An aerial view of a woman sitting in a blue chair on the beach.  
[H] A woman is enjoying a day at the beach.

[LABEL] **entailment** [PRED] **neutral** [COEFF] 40.8203  
[P] A large white boat is slowing coasting on the ocean with several people inside.  
[H] The people are enjoying their cruise on the boat.

[LABEL] **neutral** [PRED] **neutral** [COEFF] 40.7351  
[P] A person is walking on the bridge over a canal, and buildings are bright under sun and clear sky.  
[H] The person is admiring the beauty of nature.

[LABEL] **neutral** [PRED] **neutral** [COEFF] 39.9630

[P] There are three fully clothed women laying on the beach together with a man nearby as well.

[H] The three women are enjoying their time

[LABEL] **neutral** [PRED] **neutral** [COEFF] 39.7531

[P] A man overlooks stands on the beach overlooking the sea with a cityscape in the background.

[H] The man was enjoying his view

[LABEL] **neutral** [PRED] **neutral** [COEFF] 39.6802

[P] A man walks his dog near the ocean.

[H] The man enjoys the ocean breeze.

[LABEL] **neutral** [PRED] **neutral** [COEFF] 38.8521

[P] Person standing on rocky edge of water with hilly land in background.

[H] A person enjoying nature.

[LABEL] **neutral** [PRED] **neutral** [COEFF] 38.3917

[P] A backpacker and a dog on a snow covered landscape at nightfall.

[H] They are enjoying the snow.

[LABEL] **neutral** [PRED] **neutral** [COEFF] 38.1549

[P] A man is standing on rocks looking towards the mountains.

[H] A man is enjoying the view of the mountains.

[LABEL] **neutral** [PRED] **neutral** [COEFF] 36.4174

[P] People stand and look out the window to view the mountain.

[H] The people are enjoying the view of a mountain at sunset.

[LABEL] **neutral** [PRED] **neutral** [COEFF] 35.0209

[P] A young girl in a bulky gray coat is sitting on a pink bicycle with one foot on the curb that leads to a large area of green grass and trees.

[H] A young girl has fun at the park.

[LABEL] **neutral** [PRED] **neutral** [COEFF] 33.0296

[P] A baby girl in a light blue and pink dress leaning on a stone platform outdoors.

[H] The baby is enjoying the sunlight.

## 1.199 Component 198

[LABEL] **contradiction** [PRED] **contradiction** [COEFF] 21.7094

[P] A man in white singing and playing the guitar

[H] A man is sleeping.

[LABEL] **contradiction** [PRED] **contradiction** [COEFF] 20.5688

[P] A man in a teal shirt welding something.

[H] A man is sleeping



[LABEL] contradiction [PRED] contradiction [COEFF] 19.5127  
[P] A man working in the fields as he moves his hands around the tall grass.  
[H] A man is sleeping.

[LABEL] contradiction [PRED] contradiction [COEFF] 18.3698  
[P] A person is hanging up pictures of women with a few onlookers watching surrounded by bikes.  
[H] The person is sleeping.

[LABEL] contradiction [PRED] contradiction [COEFF] 16.9532  
[P] A woman works hard forming clay.  
[H] A woman is sleeping

[LABEL] contradiction [PRED] contradiction [COEFF] 16.3159  
[P] A man in a pink shirt and sunglasses watching a cultural event at a waterfront.  
[H] A man is sleeping.

[LABEL] contradiction [PRED] contradiction [COEFF] 16.0900  
[P] A man in a green outfit shows off his red motorcycle for a crowd  
[H] A man is sleeping.

[LABEL] contradiction [PRED] contradiction [COEFF] 15.7322  
[P] Two men and a woman smiling and holding music instruments and a microphone.  
[H] The people are sleeping.

[LABEL] contradiction [PRED] contradiction [COEFF] 15.3995  
[P] A man with tattooed legs wields a shovel.  
[H] A man is sleeping.

[LABEL] contradiction [PRED] contradiction [COEFF] 15.1234  
[P] A child is holding up a broom in front of a christmas tree.  
[H] The child is sleeping.

[LABEL] contradiction [PRED] contradiction [COEFF] 15.0417  
[P] A male and female fire performer, work their craft in front of an audience.  
[H] A male and a female are sleeping.

[LABEL] contradiction [PRED] contradiction [COEFF] 15.0225  
[P] Man holding a sword like a violin and stroking a violin bow across it.  
[H] A man is sleeping.

[LABEL] contradiction [PRED] contradiction [COEFF] 14.9952  
[P] A man is smiling while working the mixing board as he dj s.  
[H] The man is sleeping.

[LABEL] contradiction [PRED] contradiction [COEFF] 14.8867  
[P] A group of men play soccer.

[H] Men are sleeping.

[LABEL] **contradiction** [PRED] **contradiction** [COEFF] 14.2524

[P] People eating around a table.

[H] The people are sleeping.

[LABEL] **contradiction** [PRED] **contradiction** [COEFF] 14.1304

[P] A bride and groom dancing with other couples at a reception.

[H] A couple is sleeping

## 1.200 Component 199

[LABEL] **contradiction** [PRED] **contradiction** [COEFF] 9.0861

[P] A group of workers working on a metal framework similar to scaffolding.

[H] A group of workers work on their tans.

[LABEL] **contradiction** [PRED] **contradiction** [COEFF] 7.8347

[P] A young man with darker skin and a shaved head is sitting down smoking a cigarette.

[H] The man is sitting down drinking alcohol.

[LABEL] **neutral** [PRED] **contradiction** [COEFF] 7.5683

[P] A young gentlemen with a blue tie talking into a microphone.

[H] A young comedian jokes into the microphone

[LABEL] **contradiction** [PRED] **contradiction** [COEFF] 7.1292

[P] A food vendor holds up a bag of snacks and a bottle as he stands in the crowd at a sports venue.

[H] The man is buying a bottle of beer at a bar.

[LABEL] **neutral** [PRED] **contradiction** [COEFF] 6.7906

[P] A man in a banana custom is carrying four children on his back.

[H] A man is wearing a halloween costume.

[LABEL] **neutral** [PRED] **contradiction** [COEFF] 6.6485

[P] Workers kneel down in a stone pathway.

[H] Workers are in construction.

[LABEL] **contradiction** [PRED] **contradiction** [COEFF] 6.5834

[P] A new york yankee holds up a bat.

[H] The new york yankee is going fishing.

[LABEL] **neutral** [PRED] **contradiction** [COEFF] 6.5589

[P] A street performer in a yellow shirt rides a high unicycle.

[H] A person is performing on his unicycle in a circus

[LABEL] **contradiction** [PRED] **contradiction** [COEFF] 6.3853

[P] Two women in red shirts are standing in a kitchen.

[H] The women are in shopping.

[LABEL] **neutral** [PRED] **contradiction** [COEFF] 6.2278

[P] A child hanging from a hay bale loader.

[H] The child is playing on a hay bale loader

[LABEL] **contradiction** [PRED] **contradiction** [COEFF] 6.2243

[P] A brunette lady wearing glasses and a flowered dress juggles tennis balls on the street.

[H] A woman is dressed as a clown.

[LABEL] **contradiction** [PRED] **contradiction** [COEFF] 5.9908

[P] A woman with braids is kneeling down and adjusting string on a machine

[H] A woman knitting.

[LABEL] **contradiction** [PRED] **contradiction** [COEFF] 5.9628

[P] A woman in blue resting on a bench in front of a huge religious mural

[H] A woman is cooking.

[LABEL] **contradiction** [PRED] **contradiction** [COEFF] 5.9454

[P] Two individuals, one male and one unknown, playfully wrestle on a cement floor while five onlookers smile.

[H] Two people are scuba diving

[LABEL] **neutral** [PRED] **neutral** [COEFF] 5.8624

[P] A man in a blue shirt looks under the hood of a historical red fire engine in an outdoor setting.

[H] A man is repairing a fire truck

[LABEL] **neutral** [PRED] **contradiction** [COEFF] 5.8607

[P] A man wearing a black knit cap with a red and white striped headband with a flower on top.

[H] The man is a clown.

## 1.201 Component 200

[LABEL] **neutral** [PRED] **contradiction** [COEFF] 45.9943

[P] Two young boys running on a grassy field

[H] The little boys are playing together.

[LABEL] **neutral** [PRED] **contradiction** [COEFF] 44.3859

[P] A young girl running through orange cones.

[H] The young girl is playing around.

[LABEL] **neutral** [PRED] **contradiction** [COEFF] 44.1895

[P] The large dog is running through snow.

[H] Dog is playing on the snow

[LABEL] **neutral** [PRED] **neutral** [COEFF] 39.8663

[P] A man wearing a hat is running through water

[H] A man is playing in the water.

[LABEL] **neutral** [PRED] **neutral** [COEFF] 39.3680

[P] A little girl running at on the shore of a beach.

[H] A girl is playing with her friends.

[LABEL] **neutral** [PRED] **neutral** [COEFF] 38.8203

[P] A white dog jumps from the grass into water from a hose.

[H] A dog is in the backyard playing.

[LABEL] **neutral** [PRED] **contradiction** [COEFF] 35.4193

[P] Someone in a green shirt running behind a small dog.

[H] Someone in a green shirt is playing with a small dog.

[LABEL] **neutral** [PRED] **neutral** [COEFF] 34.3898

[P] A little girl in a yellow t - shirt is tumbling towards the end of a yellow slide.

[H] A girl is playing with her friends at the park.

[LABEL] **neutral** [PRED] **contradiction** [COEFF] 32.2910

[P] A little girl is jumping down a sandy hill.

[H] A girls is playing by herself.

[LABEL] **entailment** [PRED] **contradiction** [COEFF] 31.4416

[P] A dog running through the sand.

[H] A dog is playing outside.

[LABEL] **entailment** [PRED] **neutral** [COEFF] 31.3602

[P] Four teenagers, three girls and one boy, are jumping in the air on a sidewalk by the river.

[H] The teens are playing outside.

[LABEL] **neutral** [PRED] **neutral** [COEFF] 31.0623

[P] A big, black dog with a red collar runs in the water.

[H] The dogs are playing

[LABEL] **neutral** [PRED] **contradiction** [COEFF] 30.8832

[P] Two boys running in a giant metal wheel.

[H] Two boys are playing at the park.

[LABEL] **neutral** [PRED] **neutral** [COEFF] 30.6107

[P] While the man walks along the fence, a dog is running towards the tree.

[H] A dog and his owner are playing fetch by the fence.

[LABEL] **neutral** [PRED] **neutral** [COEFF] 30.3241

[P] Two girls running through pool while water sprays over them

[H] Two girls are playing in their front yard during summer.

[LABEL] **neutral** [PRED] **neutral** [COEFF] 29.7459  
[P] 3 young blond kids in life preservers jump on hay bales.  
[H] Kids play in the barn

## 1.202 Component 201

[LABEL] **contradiction** [PRED] **contradiction** [COEFF] 60.2221  
[P] A little boy holding a bird in what looks like the forest.  
[H] The boy is asleep.

[LABEL] **contradiction** [PRED] **contradiction** [COEFF] 49.5554  
[P] A boy and a large dog stand on a dock watching another dog swim in the water.  
[H] The boy is asleep.

[LABEL] **contradiction** [PRED] **contradiction** [COEFF] 48.5042  
[P] A woman peeks into a telescope in the woods.  
[H] A woman is asleep.

[LABEL] **contradiction** [PRED] **contradiction** [COEFF] 48.0462  
[P] A little baby plays croquet.  
[H] The baby is asleep

[LABEL] **contradiction** [PRED] **contradiction** [COEFF] 46.5104  
[P] A man's hand is shown helping a spatula to flip a pancake from a square frying pan in a messy kitchen.  
[H] The man is asleep.

[LABEL] **contradiction** [PRED] **contradiction** [COEFF] 46.3742  
[P] A little girl is outside holding a snowball.  
[H] The girl is asleep

[LABEL] **contradiction** [PRED] **contradiction** [COEFF] 45.2487  
[P] A worker in a blue hard - hat looks on as another man works  
[H] The men are asleep.

[LABEL] **contradiction** [PRED] **contradiction** [COEFF] 43.1145  
[P] Young boys enjoying a spray of water.  
[H] The boys are asleep

[LABEL] **contradiction** [PRED] **contradiction** [COEFF] 42.9054  
[P] Two young ladies pose outside of a brick building and smile for the camera.  
[H] The ladies are asleep.

[LABEL] **contradiction** [PRED] **contradiction** [COEFF] 42.4760  
[P] Man on a pier looks at two dogs standing in shallow water.  
[H] The man is asleep.

[LABEL] contradiction [PRED] contradiction [COEFF] 42.0715

[P] A man creating a piece of art made of wood

[H] The man is asleep.

[LABEL] contradiction [PRED] contradiction [COEFF] 40.8832

[P] A european farmer is putting hay down to keep the river from eroding.

[H] The farmer is asleep

[LABEL] contradiction [PRED] contradiction [COEFF] 40.7086

[P] An instructor is teaching his students how to escape a hold in a self - defense class.

[H] The instructor is asleep

[LABEL] contradiction [PRED] contradiction [COEFF] 39.9484

[P] Photographers are taking pictures in a building.

[H] The photographers are asleep

[LABEL] neutral [PRED] contradiction [COEFF] 39.1206

[P] A bird is flying on the beach as a girl runs in the sand.

[H] The girl is asleep

[LABEL] contradiction [PRED] contradiction [COEFF] 38.9435

[P] A black lab puppy runs with an orange ball on an autumn day.

[H] The puppy is asleep.

## 1.203 Component 202

[LABEL] entailment [PRED] entailment [COEFF] 17.8930

[P] A man is carving a piece of rectangular wood.

[H] Someone is carving wood.

[LABEL] entailment [PRED] entailment [COEFF] 16.6388

[P] Asian man walking on a beach with pant legs rolled up.

[H] Someone is walking on the beach.

[LABEL] entailment [PRED] entailment [COEFF] 16.5846

[P] A man drilling a hole in the ice.

[H] Someone is drilling.

[LABEL] entailment [PRED] entailment [COEFF] 15.5493

[P] A woman sitting at a sewing machine looks up.

[H] Someone is looking up.

[LABEL] entailment [PRED] entailment [COEFF] 14.4007

[P] A man in a hat is walking in a parking lot.

[H] There is someone in a parking lot.

[LABEL] entailment [PRED] entailment [COEFF] 12.8235  
[P] A man is seasoning food on a grill.  
[H] Someone is seasoning food

[LABEL] entailment [PRED] entailment [COEFF] 12.6452  
[P] Man in white shirt walking.  
[H] Someone is walking.

[LABEL] entailment [PRED] entailment [COEFF] 12.4667  
[P] A young boy standing on a street watching the traffic  
[H] Someone is watching traffic.

[LABEL] entailment [PRED] entailment [COEFF] 12.4137  
[P] A skier wearing a blue jacket and helmet is skiing down a hill.  
[H] There is someone skiing

[LABEL] entailment [PRED] entailment [COEFF] 11.8997  
[P] A man is standing in front of a prince st. cafe.  
[H] Someone is standing in front of a cafe.

[LABEL] entailment [PRED] entailment [COEFF] 11.8711  
[P] A girl wearing a blue top has her feet in the stream.  
[H] Someone has their feet in the water.

[LABEL] entailment [PRED] entailment [COEFF] 11.6875  
[P] While sitting on a blue plastic chair, a man in a pink shirt peels fruit into a bowl.  
[H] Someone is peeling fruit.

[LABEL] entailment [PRED] entailment [COEFF] 11.3801  
[P] A man wearing a necktie sitting down and trying to take a drink.  
[H] There is someone sitting down.

[LABEL] entailment [PRED] entailment [COEFF] 11.3784  
[P] A young boy wearing a teal shirt, dark blue trousers, and a large red backpack is walking down a brick - paved passage next to a brightly - painted brick wall.  
[H] Someone is walking next to a wall.

[LABEL] entailment [PRED] entailment [COEFF] 11.0299  
[P] A woman sitting against a wall behind a pane of glass.  
[H] Someone is sitting.

[LABEL] entailment [PRED] entailment [COEFF] 10.1513  
[P] Adult with red boots and purse walking down the street next to a brick wall.  
[H] Someone is walking down a street.

## 1.204 Component 203

[LABEL] **contradiction** [PRED] **contradiction** [COEFF] 22.8772

[P] A white boy prepares food while looking at the camera.

[H] A boy is taking a shower.

[LABEL] **contradiction** [PRED] **contradiction** [COEFF] 18.3459

[P] A man with a backpack looks upon white objects on the ground.

[H] The man is taking a shower.

[LABEL] **contradiction** [PRED] **contradiction** [COEFF] 14.9328

[P] A man in winter clothing is standing in the snow in a mountain range.

[H] The man is taking a bath.

[LABEL] **contradiction** [PRED] **contradiction** [COEFF] 14.2433

[P] A man in a group of people outside smoking.

[H] A male taking a shower.

[LABEL] **contradiction** [PRED] **contradiction** [COEFF] 14.0824

[P] A girl on a bike stops to look back.

[H] A girl is taking a bath in her bathtub.

[LABEL] **contradiction** [PRED] **contradiction** [COEFF] 13.4595

[P] Someone on a dirt bike, high in the air, near a building.

[H] The person is taking a bath.

[LABEL] **contradiction** [PRED] **contradiction** [COEFF] 12.9123

[P] A boy wearing a brown shirt and hat sits on a box next to a girl in front of a store.

[H] The boy is taking a shower.

[LABEL] **contradiction** [PRED] **contradiction** [COEFF] 12.0761

[P] A toddler is riding a plastic scooter.

[H] A toddler is taking a bath.

[LABEL] **contradiction** [PRED] **contradiction** [COEFF] 11.9978

[P] A topless woman playing guitar

[H] A shirtless lady taking a shower.

[LABEL] **contradiction** [PRED] **contradiction** [COEFF] 11.3505

[P] A young child dressed like a wizard is crying.

[H] The young child was taking a shower.

[LABEL] **contradiction** [PRED] **contradiction** [COEFF] 11.0486

[P] At an intersection, a man is pushing a gurney loaded with boxes in front of a woman wearing brown boots.

[H] The man is shaving his beard in the mirror.

[LABEL] **contradiction** [PRED] **contradiction** [COEFF] 10.9783



[P] A kid is examining a slide under a microscope outside.

[H] A kid is washing his face before bed.

[LABEL] **contradiction** [PRED] **contradiction** [COEFF] 10.3161

[P] A man in a white t - shirt cleaning up debris.

[H] A man is learning how to swim.

[LABEL] **contradiction** [PRED] **contradiction** [COEFF] 9.8199

[P] People mountain climbing.

[H] The people were taking a bath.

[LABEL] **contradiction** [PRED] **contradiction** [COEFF] 9.2240

[P] Stunt man on fire with two men watching.

[H] A stunt man is eating lunch and getting ready for the next scene

[LABEL] **contradiction** [PRED] **contradiction** [COEFF] 9.1620

[P] A brown dog sits on a couch.

[H] A dog is getting a bath inside a bathtub.

## 1.205 Component 204

[LABEL] **contradiction** [PRED] **contradiction** [COEFF] 12.2027

[P] The cup is shiny.

[H] The cup is dull.

[LABEL] **neutral** [PRED] **contradiction** [COEFF] 12.1405

[P] It is too hot and they sit near a river.

[H] It is cold at the river.

[LABEL] **contradiction** [PRED] **contradiction** [COEFF] 9.8701

[P] The animals look very happy and healthy.

[H] The animals are sick and suffering.

[LABEL] **contradiction** [PRED] **contradiction** [COEFF] 9.0490

[P] Two men on a dock talk to the passengers arriving in a red boat.

[H] The boat is black.

[LABEL] **contradiction** [PRED] **contradiction** [COEFF] 8.9983

[P] A large crowd of people are sitting watching a dog jump high up to catch a frisbee with a man standing under the dog looking up at it.

[H] The crowd is small

[LABEL] **contradiction** [PRED] **contradiction** [COEFF] 8.9182

[P] Two asian women singing.

[H] The two asian women are being silent.

[LABEL] contradiction [PRED] contradiction [COEFF] 8.9181

[P] A runner hurdles over an obstacle.

[H] Nobody is hurdling

[LABEL] contradiction [PRED] contradiction [COEFF] 8.8789

[P] A brown dog wearing a pink shirt is followed by a brown dog wearing a yellow shirt.

[H] The dog is wearing nothing

[LABEL] contradiction [PRED] contradiction [COEFF] 8.8656

[P] People enjoying a warm evening in a tropical city.

[H] The people are gathered outside in the cold weather.

[LABEL] contradiction [PRED] contradiction [COEFF] 8.4554

[P] A small band with various instruments is performing next to a trashcan.

[H] A large band with various instruments is performing next to a trashcan.

[LABEL] contradiction [PRED] contradiction [COEFF] 8.3887

[P] A large man about to jump off a car.

[H] A small man sits inside the car.

[LABEL] contradiction [PRED] contradiction [COEFF] 8.2887

[P] Two pipe - fitters weld a seam joining a large coupling.

[H] The coupling is small

[LABEL] contradiction [PRED] contradiction [COEFF] 8.1908

[P] The snowboarder is sitting down.

[H] The snowboarder is standing.

[LABEL] contradiction [PRED] contradiction [COEFF] 8.1359

[P] A girl is folding laundry in what appears to be a very small room.

[H] The room is large

[LABEL] contradiction [PRED] contradiction [COEFF] 7.9815

[P] Three people standing on a rocky shore throw rocks into a large body of water.

[H] The body of water is small

[LABEL] contradiction [PRED] contradiction [COEFF] 7.6450

[P] A city street is illuminated by lamps at night.

[H] A city street is dark at night due to no lamps.

## 1.206 Component 205

[LABEL] contradiction [PRED] contradiction [COEFF] 10.6588

[P] A man is instructing other men using a whiteboard and dry - erase markers.

[H] The man is silent

[LABEL] contradiction [PRED] contradiction [COEFF] 7.5034  
[P] Women in sari's look on as a woman is speaking.  
[H] The women are completely silent.

[LABEL] contradiction [PRED] contradiction [COEFF] 7.2048  
[P] A woman is walking down the street with a broken umbrella and her shopping bag on her arm.  
[H] The woman is buried in the sand.

[LABEL] contradiction [PRED] contradiction [COEFF] 6.5379  
[P] Jockey riding a horse around the racetrack.  
[H] The horse didn't race because the jockey was sick today and stayed home.

[LABEL] contradiction [PRED] contradiction [COEFF] 6.5269  
[P] A crowd of people dressed for warm weather stand in line in front of a building waiting for something.  
[H] People stayed home.

[LABEL] contradiction [PRED] contradiction [COEFF] 6.4828  
[P] A band performs on stage while the crowd raises their hands and clap.  
[H] The band's performance was cancelled.

[LABEL] contradiction [PRED] contradiction [COEFF] 6.4527  
[P] Team great britain cycles to the finish line.  
[H] Great britain has never competed in cycling

[LABEL] contradiction [PRED] contradiction [COEFF] 6.4026  
[P] A city street busy with people and cars.  
[H] It is a ghost town.

[LABEL] contradiction [PRED] contradiction [COEFF] 6.3605  
[P] The curly man wearing gloves is raking the grass.  
[H] He is frozen solid

[LABEL] contradiction [PRED] contradiction [COEFF] 6.3032  
[P] An older man with a blue suit is talking into a red microphone.  
[H] The man is silent

[LABEL] contradiction [PRED] contradiction [COEFF] 6.3001  
[P] A man climbing a big mountain.  
[H] The man has never climbed anything

[LABEL] contradiction [PRED] contradiction [COEFF] 5.9390  
[P] A group of three girls stand talking in front of a photo booth that is covered with graffiti.  
[H] The girl is alone at the mall

[LABEL] contradiction [PRED] contradiction [COEFF] 5.8197  
[P] Two young women hold hands as they walk quickly along a city sidewalk.  
[H] She doesn't have any thing

[LABEL] **contradiction** [PRED] **contradiction** [COEFF] 5.6973

[P] Two football players chase after a the ball.

[H] The players are standing still.

[LABEL] **contradiction** [PRED] **contradiction** [COEFF] 5.6129

[P] Kids jump in a sack race, as a little girl on the beach with a minnie mouse bucket with her shovel scoops up the sand in piles.

[H] The kids are all absolutely silent.

[LABEL] **contradiction** [PRED] **contradiction** [COEFF] 5.3881

[P] People hanging out and talking about their interests.

[H] The people are silent.

## 1.207 Component 206

[LABEL] **contradiction** [PRED] **contradiction** [COEFF] 49.0910

[P] A man in a black jacket on a bike talks to a seated woman on a busy street.

[H] The man is swimming in a pool.

[LABEL] **contradiction** [PRED] **contradiction** [COEFF] 28.8662

[P] A man in a green sweater holds a round, decorative pillow.

[H] A man is swimming in a pool

[LABEL] **contradiction** [PRED] **contradiction** [COEFF] 27.6308

[P] People are sitting at tables in the dark nearby a lit fire.

[H] People are swimming in a pool.

[LABEL] **contradiction** [PRED] **contradiction** [COEFF] 26.8268

[P] A man in a gray shirt is taking notes on a small piece of paper.

[H] The man is swimming in his pool.

[LABEL] **contradiction** [PRED] **contradiction** [COEFF] 24.9953

[P] A bunch of young girls are walking in the sand.

[H] The young girls are swimming in a pool.

[LABEL] **contradiction** [PRED] **contradiction** [COEFF] 24.5610

[P] A boy and girl are standing together, one is holding a plate of desserts.

[H] The children are swimming in the pool.

[LABEL] **contradiction** [PRED] **contradiction** [COEFF] 24.0843

[P] A very young girl is standing outside of a building.

[H] A very young girl is swimming in a river.

[LABEL] **contradiction** [PRED] **contradiction** [COEFF] 23.4048

[P] A woman with a bright orange backpack is standing in front of a stairway.

[H] A woman is swimming in the ocean.

[LABEL] contradiction [PRED] contradiction [COEFF] 23.1560

[P] This is a man shoveling snow, next to a car.

[H] The man is about to swim in a pool.

[LABEL] contradiction [PRED] contradiction [COEFF] 23.1510

[P] An indian woman is dyeing fabric while a man weaves on a large loom behind her.

[H] A woman is swimming in a lake.

[LABEL] contradiction [PRED] contradiction [COEFF] 23.0642

[P] A young white man is climbing a mountain with a rope as a guide.

[H] A young white man is swimming in a pool.

[LABEL] contradiction [PRED] contradiction [COEFF] 22.5237

[P] Several children lined up at and looking through a fence.

[H] The children are swimming in a pool.

[LABEL] contradiction [PRED] contradiction [COEFF] 21.4454

[P] A man with red pants holding on to a wall trying to make it sown some small rocks.

[H] A man is swimming in the ocean.

[LABEL] contradiction [PRED] contradiction [COEFF] 19.6950

[P] A well dressed man in front of a microphone is attacked by a dragon pinata and a lady.

[H] The man is swimming alone in a pool.

[LABEL] contradiction [PRED] contradiction [COEFF] 19.1729

[P] A woman in a white shirt and pink pants is standing behind a table laid out with cake, strawberries and punch.

[H] A woman dives off a diving board into a pool.

[LABEL] contradiction [PRED] contradiction [COEFF] 18.8436

[P] A child in an orange shirt swings on a swing.

[H] The kid is swimming in a pool full of jell - o.

## 1.208 Component 207

[LABEL] contradiction [PRED] contradiction [COEFF] 11.2817

[P] A dog jumps into a pool while someone watches from the side.

[H] A dog is laying next to the pool.

[LABEL] contradiction [PRED] contradiction [COEFF] 9.2916

[P] Brown and white dog jumps over purple and white bar.

[H] The brown and white dog is sleeping under a purple and white bar.

[LABEL] contradiction [PRED] contradiction [COEFF] 8.9008

[P] A skateboarder jumping with his skateboard

[H] A skateboarder is resting on a bench.

[LABEL] contradiction [PRED] contradiction [COEFF] 8.7959

[P] The dog leaps to catch the frisbee.

[H] A dog is sleeping on the ground.

[LABEL] contradiction [PRED] contradiction [COEFF] 8.5275

[P] A man, wearing a hooded jacket and backpack, is jumping in the air.

[H] A man is laying down.

[LABEL] contradiction [PRED] contradiction [COEFF] 8.4687

[P] A small, black dog jumps through the air while a person beckons it.

[H] The small black dog is asleep on the rug.

[LABEL] contradiction [PRED] contradiction [COEFF] 7.9610

[P] A man is jumping in the air in front of a coastal scene with water and mountains in the background.

[H] A man is sitting on the ground near a beach.

[LABEL] contradiction [PRED] contradiction [COEFF] 7.9573

[P] A white dog is running on a beach towards a domed building.

[H] A white dog is sleeping at the foot of a domed building.

[LABEL] contradiction [PRED] contradiction [COEFF] 7.8219

[P] A child is leaping from one bed to another in the same room.

[H] The child is relaxing on the sofa.

[LABEL] contradiction [PRED] contradiction [COEFF] 7.7777

[P] One man jumping on beach.

[H] A man resting on a bench.

[LABEL] contradiction [PRED] contradiction [COEFF] 7.5943

[P] A dog runs through a field.

[H] A dog sleeps in the yard.

[LABEL] contradiction [PRED] contradiction [COEFF] 7.5807

[P] A white dog jumps to catch a blue ball in a living room.

[H] A dog is sleeping on the couch.

[LABEL] contradiction [PRED] contradiction [COEFF] 7.5806

[P] A black and white dog jumping into a pool with a lot of tennis balls in it.

[H] The dogs are resting on the ground.

[LABEL] contradiction [PRED] contradiction [COEFF] 7.5517

[P] A young girl jumping over a railing or a ladder on its side.

[H] Young girl sleeps on the bed.

[LABEL] contradiction [PRED] contradiction [COEFF] 7.5291

[P] A dark brown dog is running along a fence outside.

[H] A dog lounges on an open field.

[LABEL] **contradiction** [PRED] **contradiction** [COEFF] 7.4046

[P] A white and brown dog is leaping through the air.

[H] The dog is taking a nap.

## 1.209 Component 208

[LABEL] **contradiction** [PRED] **contradiction** [COEFF] 7.7873

[P] Confetti is in the air among a huge crowd of people at some kind of celebration.

[H] People are sleeping in a tent in the woods.

[LABEL] **contradiction** [PRED] **contradiction** [COEFF] 7.7209

[P] A person standing on stilts is bending over.

[H] A cow is standing in a field.

[LABEL] **contradiction** [PRED] **contradiction** [COEFF] 7.4388

[P] Two people are together and one of them is using a microphone.

[H] The people are cooking.

[LABEL] **neutral** [PRED] **contradiction** [COEFF] 6.6479

[P] A large crowd of people watch the stage as an outside concert takes place.

[H] The crowd is sitting in the grass

[LABEL] **contradiction** [PRED] **contradiction** [COEFF] 6.5221

[P] A crowd of people is walking on a sidewalk.

[H] Crows are walking on a couch.

[LABEL] **contradiction** [PRED] **contradiction** [COEFF] 6.3005

[P] The women are looking at the beautiful jewelry.

[H] The women are looking at rabbits.

[LABEL] **contradiction** [PRED] **contradiction** [COEFF] 6.2609

[P] Two girls are looking past each other in different directions while standing in a crowd.

[H] Two girls are knitting a sweater while relaxing on the couch.

[LABEL] **contradiction** [PRED] **contradiction** [COEFF] 6.1931

[P] Three street performers performing to a large crowd.

[H] Three men sit at a table and enjoy their coffee.

[LABEL] **contradiction** [PRED] **contradiction** [COEFF] 5.6242

[P] Two women in renaissance clothing are performing on stage.

[H] Two woman hugging for a picture by the beach.

[LABEL] **contradiction** [PRED] **contradiction** [COEFF] 5.5505

[P] A man in winter wear stands near an intersection.

[H] There is a man cooking.

[LABEL] **contradiction** [PRED] **contradiction** [COEFF] 5.4154

[P] A crowd of women wearing multiple different colors is entering a stone structure.

[H] A crowd of women is knitting in the park

[LABEL] **contradiction** [PRED] **contradiction** [COEFF] 5.3273

[P] A man wearing a red shirt and safety hat works on construction.

[H] A shirtless man works on a lobster boat.

[LABEL] **contradiction** [PRED] **contradiction** [COEFF] 5.2879

[P] A group of people working to package the drink.

[H] A group of dogs working to package the food.

[LABEL] **contradiction** [PRED] **contradiction** [COEFF] 5.2819

[P] Cameras set up on tripods along the side of a road barrier.

[H] A kitten is playing with a ball of yarn.

[LABEL] **contradiction** [PRED] **contradiction** [COEFF] 5.2348

[P] A man sitting at a desk with a large pile of papers on his lap.

[H] A man is sitting at his dining room table with a large pile of bananas on his lap.

[LABEL] **contradiction** [PRED] **contradiction** [COEFF] 5.2074

[P] Woman with red umbrella walking in a city.

[H] A woman is throwing out scratch for chickens in a pasture.

## 1.210 Component 209

[LABEL] **contradiction** [PRED] **contradiction** [COEFF] 60.4688

[P] A worker stands outside a public restroom.

[H] The worker is inside the restroom.

[LABEL] **contradiction** [PRED] **contradiction** [COEFF] 57.2554

[P] A man standing outside of a shop on the street.

[H] The man is inside the shop.

[LABEL] **contradiction** [PRED] **contradiction** [COEFF] 51.8287

[P] A man working outside in a piece of machine equipment.

[H] The man is inside

[LABEL] **contradiction** [PRED] **contradiction** [COEFF] 50.7272

[P] Two black and one white construction workers work outside.

[H] The construction workers are inside.

[LABEL] **contradiction** [PRED] **contradiction** [COEFF] 48.8615

[P] A marching band is standing outside a building in an urban area.



[H] A marching band is standing inside.

[LABEL] **contradiction** [PRED] **contradiction** [COEFF] 46.5649

[P] Two women with wet hair are holding their drinks outside.

[H] Women holding their drinks inside a bar.

[LABEL] **contradiction** [PRED] **contradiction** [COEFF] 38.1023

[P] Butcher waiting outside the store.

[H] The butcher is inside the store behind the deli counter.

[LABEL] **contradiction** [PRED] **contradiction** [COEFF] 28.8613

[P] A man and a woman with backpacks are outside.

[H] They are inside.

[LABEL] **contradiction** [PRED] **contradiction** [COEFF] 27.3224

[P] Two women standing outside of a bus.

[H] Two women are inside a bus.

[LABEL] **contradiction** [PRED] **contradiction** [COEFF] 27.3081

[P] People outside in a city field.

[H] People are inside an office building.

[LABEL] **contradiction** [PRED] **contradiction** [COEFF] 27.1168

[P] A man cooking outside on a grill.

[H] Man cooking inside on a stove.

[LABEL] **contradiction** [PRED] **contradiction** [COEFF] 26.7126

[P] This is a scene of several people walking outside during the day, including a woman with two coffee urns.

[H] People are inside sitting.

[LABEL] **contradiction** [PRED] **contradiction** [COEFF] 25.3436

[P] Young boy running outside on the pavement.

[H] A boy runs inside the house.

[LABEL] **contradiction** [PRED] **contradiction** [COEFF] 24.4831

[P] A group of people sitting outside on a deck.

[H] A group of people sitting inside on a couch.

[LABEL] **contradiction** [PRED] **contradiction** [COEFF] 21.9622

[P] Three young boys play outside.

[H] Three boys are inside watching tv.

[LABEL] **contradiction** [PRED] **contradiction** [COEFF] 20.3319

[P] A woman in a skirt is sitting outside reading.

[H] A woman in shorts is sitting inside at a desk.

## 1.211 Component 210

[LABEL] contradiction [PRED] contradiction [COEFF] 8.9669

[P] A male figure in a long - sleeve shirt and suspenders is standing in the entry to a black train.

[H] There is a man on a plane.

[LABEL] contradiction [PRED] contradiction [COEFF] 7.5711

[P] Small black and white dog wearing a red harness is running around with a ball in its mouth.

[H] A small dog is laying in it's bed.

[LABEL] contradiction [PRED] contradiction [COEFF] 7.3858

[P] A big group of bicyclist are riding around on a large bridge.

[H] The cyclists are on the beach.

[LABEL] contradiction [PRED] contradiction [COEFF] 6.8847

[P] The white - helmeted driver of the red, white and blue car, with a passenger riding shotgun, whipped up dust and rocks in the wooded taped - off area, the debris creating an eerie, ghostlike view of the face of the person behind him.

[H] The driver is driving the car in the bottom of the ocean.

[LABEL] contradiction [PRED] contradiction [COEFF] 6.6880

[P] A woman is a little scared because a bird landed on her shoulder while she was in the warehouse.

[H] The woman is at the park with her children.

[LABEL] contradiction [PRED] contradiction [COEFF] 6.5699

[P] A brown - haired man with glasses is wearing a burgundy hooded sweatshirt while sitting at a dinner table checking his cellphone.

[H] A man is riding a turtle through the jungle.

[LABEL] contradiction [PRED] contradiction [COEFF] 6.3962

[P] There is an outline of a male and female observing a bonfire or other large burning wooden object.

[H] A firefighter is putting out a small brushfire in a ditch.

[LABEL] contradiction [PRED] contradiction [COEFF] 6.3940

[P] A woman is doing a trick while jumping off a diving board.

[H] A woman in a bathing suit is reclining by the pool reading a magazine.

[LABEL] contradiction [PRED] contradiction [COEFF] 6.3688

[P] A medium brown dog is jumping over a short brick wall surrounding some dirt.

[H] The dog is laying on his bed.

[LABEL] contradiction [PRED] contradiction [COEFF] 6.0612

[P] A black dog is jumping out of water.

[H] The dog is sitting down

[LABEL] contradiction [PRED] contradiction [COEFF] 6.0390

[P] Three women look on as two men look at the tire of a bike.

[H] The women are looking at a newspaper

[LABEL] **neutral** [PRED] **contradiction** [COEFF] 6.0104

[P] A blond girl wearing blue jumping across a stream.

[H] A blond girl wearing blue hiking in the forest.

[LABEL] **contradiction** [PRED] **contradiction** [COEFF] 5.9494

[P] The boy wearing the red jacket is hanging on the side of the swing set.

[H] The boy is playing in the sandbox.

[LABEL] **contradiction** [PRED] **contradiction** [COEFF] 5.6596

[P] A group of girls sitting on blankets in a park area reading books.

[H] A crowd of people play with a frisbee in the park.

[LABEL] **contradiction** [PRED] **contradiction** [COEFF] 5.6241

[P] A young man in a park setting has just made a slam dunk on a basketball hoop.

[H] The man is playing soccer.

[LABEL] **contradiction** [PRED] **contradiction** [COEFF] 5.5486

[P] A woman in jeans and a tank top is sitting in the middle of a tree in bloom.

[H] The woman is standing up on the beach.

## 1.212 Component 211

[LABEL] **entailment** [PRED] **entailment** [COEFF] 23.8040

[P] Two people are performing in front of a crowd in a downtown area.

[H] People are performing.

[LABEL] **entailment** [PRED] **entailment** [COEFF] 22.5460

[P] A group of oriental dancers are performing in a parking lot.

[H] Dancers are performing.

[LABEL] **entailment** [PRED] **entailment** [COEFF] 20.7076

[P] A man and two kids are walking down a street

[H] People are walking.

[LABEL] **entailment** [PRED] **entailment** [COEFF] 20.2412

[P] A group of people walk down the sidewalk in a city.

[H] People are walking.

[LABEL] **entailment** [PRED] **entailment** [COEFF] 19.7849

[P] Dour baseball players in a field, one is touching the ball to the ground and one is sliding past a base.

[H] People are playing baseball.

[LABEL] **entailment** [PRED] **entailment** [COEFF] 19.7750

[P] Dour baseball players in a field, one is touching the ball to the ground and one is sliding past a base.

[H] People are playing baseball.

[LABEL] **entailment** [PRED] **entailment** [COEFF] 18.2770

[P] A crowd of people walking on a sidewalk in a city.

[H] People are walking.

[LABEL] **entailment** [PRED] **entailment** [COEFF] 17.9642

[P] Workers wearing yellow and white hard hats working on tracks.

[H] People are working.

[LABEL] **entailment** [PRED] **entailment** [COEFF] 17.8900

[P] People taking a walk on a trail on a nice cloudy day.

[H] People are walking.

[LABEL] **entailment** [PRED] **entailment** [COEFF] 17.8124

[P] Pedestrians walk in front of an industrial complex.

[H] People are walking.

[LABEL] **entailment** [PRED] **entailment** [COEFF] 17.2334

[P] Many different people at a protest holding different flags and signs.

[H] People are holding things.

[LABEL] **entailment** [PRED] **entailment** [COEFF] 17.2288

[P] Kids are playing ball in front of a big fancy building

[H] Kids are playing.

[LABEL] **entailment** [PRED] **entailment** [COEFF] 17.1736

[P] Baseball players playing with kids and adults on a field.

[H] People are playing baseball.

[LABEL] **entailment** [PRED] **entailment** [COEFF] 16.4934

[P] All these people enjoy the parade by participating in it.

[H] People are at a parade.

[LABEL] **entailment** [PRED] **entailment** [COEFF] 16.2124

[P] A busy street with shoppers making their way home.

[H] People are shopping.

[LABEL] **entailment** [PRED] **entailment** [COEFF] 16.0070

[P] Guys wearing yellow, red, and blue are running in the grass.

[H] People are running.

### 1.213 Component 212

[LABEL] **neutral** [PRED] **contradiction** [COEFF] 55.4937

[P] A person pointing at something while two people watch.

[H] A man saw something interesting.

[LABEL] **neutral** [PRED] **neutral** [COEFF] 52.9484

[P] A person wearing a large - brimmed hat is standing by a green moped while looking over a body of water with a skyline in the background.

[H] A man is standing near a moped staring out over the water.

[LABEL] **neutral** [PRED] **contradiction** [COEFF] 50.2949

[P] A person in a yellow - floral shirt is playing the guitar.

[H] A man is performing at a classical guitar concert.

[LABEL] **neutral** [PRED] **neutral** [COEFF] 49.3475

[P] A person is rollerblading on a railing by a sidewalk with people.

[H] A man rollerblades past a couple on the sidewalk.

[LABEL] **entailment** [PRED] **neutral** [COEFF] 48.7388

[P] A person in a large field plays with a model airplane.

[H] The man is playing with the model airplane.

[LABEL] **entailment** [PRED] **neutral** [COEFF] 43.9738

[P] A person with red gloves carries a shovel through the snow.

[H] A man trying to clear snow off his path.

[LABEL] **neutral** [PRED] **neutral** [COEFF] 43.4770

[P] A person in a red coat plays an electric guitar.

[H] A man plays electric guitar in his band.

[LABEL] **neutral** [PRED] **neutral** [COEFF] 41.7891

[P] A person walks in the dark near streetlights.

[H] A man walks at night.

[LABEL] **entailment** [PRED] **contradiction** [COEFF] 41.6894

[P] Two construction workers, one of which is putting a tree into a big machine.

[H] A man is putting a tree in a machine.

[LABEL] **neutral** [PRED] **neutral** [COEFF] 39.7593

[P] A person did a side flip while water boarding.

[H] A man did a side flip while on his pink water board.

[LABEL] **neutral** [PRED] **neutral** [COEFF] 37.1950

[P] A person is sliding down a slide with a coat, jacket, gloves, and boots on.

[H] A man is having fun.

[LABEL] **neutral** [PRED] **neutral** [COEFF] 35.6167

[P] A worker walking down the street.

[H] A man is walking as a form of exercise

[LABEL] entailment [PRED] neutral [COEFF] 35.4281

[P] The street performer on the crate is painted silver.

[H] There is a man in this picture

[LABEL] neutral [PRED] contradiction [COEFF] 35.1379

[P] A person climbs a rock face.

[H] A man is trying to reach the top

[LABEL] contradiction [PRED] neutral [COEFF] 33.7614

[P] A person in a safety vest pushing a truck.

[H] A man drives a truck.

[LABEL] entailment [PRED] contradiction [COEFF] 33.3368

[P] A rock singer belts out a tune while holding a menacing stuffed bear.

[H] A man is singing.

## 1.214 Component 213

[LABEL] contradiction [PRED] contradiction [COEFF] 24.2172

[P] A man attached to strings is watched by a crowd.

[H] The man is not attached to strings.

[LABEL] contradiction [PRED] contradiction [COEFF] 23.0914

[P] A man in his office, is staring intently at the computer screen, while holding a red pen in his left hand.

[H] A man in his office, is not staring intently at the computer screen

[LABEL] contradiction [PRED] contradiction [COEFF] 22.4300

[P] Two construction men walk in front of a big wall with a mannequin with a construction shirt near two boots.

[H] Two construction men don't walk

[LABEL] contradiction [PRED] contradiction [COEFF] 22.0903

[P] A zebra is nibbling on some grass.

[H] A zebra is not nibbling on grass.

[LABEL] contradiction [PRED] contradiction [COEFF] 21.7419

[P] People clap while two women play a game.

[H] The people are not clapping.

[LABEL] contradiction [PRED] contradiction [COEFF] 21.6032

[P] The lead singer of green day is singing into a microphone and wearing his guitar and there is a young boy behind him.

[H] The lead singer of green day is not singing

[LABEL] contradiction [PRED] contradiction [COEFF] 20.2309

[P] A group of people on a cruise ship enjoying the day.

[H] People are not on a cruise ship.

[LABEL] **contradiction** [PRED] **contradiction** [COEFF] 18.8873

[P] A man wearing a helmet has his hand up in the air and is shouting in a similar way the crowd behind his doing.

[H] A man is not wearing a helmet

[LABEL] **contradiction** [PRED] **contradiction** [COEFF] 18.3558

[P] A beautiful blond woman and brunette woman are at a bar where beer is being enjoyed dressed in traditional german or european laced up dresses.

[H] A beautiful blond woman and brunette woman are not at a bar

[LABEL] **contradiction** [PRED] **contradiction** [COEFF] 18.3105

[P] A man in jean overalls holds onto the leads of a horse hooked onto a pulling system with another horse.

[H] A man in jean overalls doesn't hold onto the leads of a horse

[LABEL] **contradiction** [PRED] **contradiction** [COEFF] 18.3074

[P] Musicians are performing a rock concert.

[H] The musicians are not performing.

[LABEL] **contradiction** [PRED] **contradiction** [COEFF] 18.1184

[P] An asian woman with large personal headphones and a surgical mask rides a commuter train while three men, also wearing masks, look at her.

[H] An asian woman with large personal headphones and a surgical mask doesn't ride a commuter train

[LABEL] **contradiction** [PRED] **contradiction** [COEFF] 18.1020

[P] A group of people are in a dirt mount, one person is talking on the one, one is taking a picture, and one is jumping in the air.

[H] A group of people are not in a dirt mount

[LABEL] **contradiction** [PRED] **contradiction** [COEFF] 17.4504

[P] A barber stares into the camera and shows the inside of his shop.

[H] The barber is not looking into the camera.

[LABEL] **contradiction** [PRED] **contradiction** [COEFF] 16.3423

[P] A person wearing a hat and glasses sits on a cliff and smiles.

[H] The person is not wearing hat.

[LABEL] **contradiction** [PRED] **contradiction** [COEFF] 16.2320

[P] A girl in a bathing suit on the beach plays with a soccer ball while a man in the background watches.

[H] A girl in a bathing suit on the beach doesn't play

## 1.215 Component 214

[LABEL] **contradiction** [PRED] **contradiction** [COEFF] 16.0405

[P] A brown and white dog is running through the snow.

[H] A dog is running through the grass on a sunny summer day.

[LABEL] **contradiction** [PRED] **contradiction** [COEFF] 12.0370  
[P] A horse driven carriage running through a rainstorm.  
[H] The carriage is driving through the country on a bright sunny day.

[LABEL] **contradiction** [PRED] **contradiction** [COEFF] 9.7913  
[P] A group of people stand at a farmers market on a dreary day.  
[H] A group of people are outside on a sunny day.

[LABEL] **contradiction** [PRED] **contradiction** [COEFF] 9.3699  
[P] City workers are carrying traffic cones on the winter streets of paris.  
[H] City workers walk down a paris street on a beautiful summer day.

[LABEL] **contradiction** [PRED] **contradiction** [COEFF] 8.6745  
[P] A new york city taxi on a snow covered street.  
[H] The weather is warm and sunny in new york city today.

[LABEL] **contradiction** [PRED] **contradiction** [COEFF] 8.6146  
[P] A woman wearing a hat and scarf in a snowy area.  
[H] It's a warm summer day.

[LABEL] **contradiction** [PRED] **contradiction** [COEFF] 7.9794  
[P] A man is walking across the street while it is snowing.  
[H] The sun was extremely warm out as the man walked.

[LABEL] **contradiction** [PRED] **contradiction** [COEFF] 7.3391  
[P] A monster truck gets stuck in a muddy hole.  
[H] Truck driving down the sunny streets

[LABEL] **contradiction** [PRED] **contradiction** [COEFF] 7.1070  
[P] Two athletes, one female and one male are running down a rain drenched street.  
[H] It is a bright and sunny day outside.

[LABEL] **contradiction** [PRED] **contradiction** [COEFF] 6.9064  
[P] Two hikers stopping to rest in the shade on a bright sunny day.  
[H] The two hikers are hiking in a rain storm.

[LABEL] **contradiction** [PRED] **contradiction** [COEFF] 6.5680  
[P] This is a rainy night in front of the swan restaurant as a diner leaves in his suv.  
[H] The restaurant opens for breakfast on a sunny morning.

[LABEL] **contradiction** [PRED] **contradiction** [COEFF] 6.0856  
[P] A line of people are making their way through snow covered mountains.  
[H] The mountains are covered with spring flowers and grass.

[LABEL] **contradiction** [PRED] **contradiction** [COEFF] 6.0771



[P] A photo of a ride at an amusement park on an overcast day.

[H] It is a sunny and hot day at the park.

[LABEL] **contradiction** [PRED] **contradiction** [COEFF] 5.7029

[P] A man walks next to the girl wearing headphones on a winters day.

[H] A man is taking a walk on a hot summer day.

[LABEL] **contradiction** [PRED] **contradiction** [COEFF] 5.5854

[P] So many people came out with their sweatshirts, blankets and hats that very cold november night.

[H] It was a balmy summer day.

[LABEL] **contradiction** [PRED] **contradiction** [COEFF] 5.3508

[P] A black and a white dog on the snow.

[H] A dog sleeps on a sunny beach.

## 1.216 Component 215

[LABEL] **entailment** [PRED] **entailment** [COEFF] 56.0160

[P] A smiling girl plays in the street.

[H] The girl is happy.

[LABEL] **neutral** [PRED] **neutral** [COEFF] 53.3357

[P] A young boy is smiling on the beach.

[H] The boy was happy.

[LABEL] **neutral** [PRED] **entailment** [COEFF] 51.6648

[P] The baby in the pink romper is smiling.

[H] The baby is happy.

[LABEL] **entailment** [PRED] **entailment** [COEFF] 44.3632

[P] A small boy wearing a light blue shirt smiles as he holds something in his hand.

[H] A small boy is happy.

[LABEL] **entailment** [PRED] **entailment** [COEFF] 44.1237

[P] A small child smiles as a ball flies towards his face.

[H] The child is happy.

[LABEL] **entailment** [PRED] **entailment** [COEFF] 43.2577

[P] 3 children holding their arms up while smiling with a christmas tree in the background.

[H] The children are happy.

[LABEL] **neutral** [PRED] **neutral** [COEFF] 37.4711

[P] An african american in sunglasses and a white tee - shirt smiles.

[H] The person is happy.

[LABEL] **entailment** [PRED] **entailment** [COEFF] 34.7219

[P] Three kids hugging wearing blue shirts with nice boy smiles.

[H] Three kids are happy.

[LABEL] **entailment** [PRED] **neutral** [COEFF] 34.1937

[P] A dark - skinned woman with a scarf on her head smiling with telephones hanging from the trees.

[H] She is happy standing near the trees.

[LABEL] **entailment** [PRED] **entailment** [COEFF] 33.9168

[P] Man, son, and vendor smile while holding souvenir magazines.

[H] The group of people seem to be happy.

[LABEL] **neutral** [PRED] **neutral** [COEFF] 32.5333

[P] A guy smiling with a stick inside a paint can.

[H] A man is happy because he's painting.

[LABEL] **entailment** [PRED] **entailment** [COEFF] 29.0938

[P] A woman with glasses in a pink shirt and flowered skirt is smiling.

[H] A woman dressed in bright colors is happy.

[LABEL] **entailment** [PRED] **entailment** [COEFF] 28.9811

[P] A child dressed in blue laughs.

[H] A child is happy.

[LABEL] **entailment** [PRED] **entailment** [COEFF] 27.6668

[P] A laughing young boy is near a swimming pool.

[H] The young boy is happy.

[LABEL] **entailment** [PRED] **entailment** [COEFF] 23.8878

[P] A smiling child in a bright orange and blue shirt sitting among peers.

[H] A happy child is sitting with friends.

[LABEL] **entailment** [PRED] **neutral** [COEFF] 23.6608

[P] A ma is placing a medal over the head of a young man wearing glasses, who has a big smile on his face.

[H] The man is very happy.

## 1.217 Component 216

[LABEL] **entailment** [PRED] **entailment** [COEFF] 37.7929

[P] A man meditating on a tall building with no shoes on

[H] A man is meditating

[LABEL] **entailment** [PRED] **entailment** [COEFF] 37.2701

[P] A woman paints a picture on a girl's face.

[H] A woman is painting

[LABEL] entailment      [PRED] entailment      [COEFF] 37.1018  
 [P] A man jumping in the air at a beach  
 [H] A man is jumping

[LABEL] entailment      [PRED] entailment      [COEFF] 33.3840  
 [P] A woman shopping for vegetables at a market.  
 [H] A woman is shopping

[LABEL] entailment      [PRED] entailment      [COEFF] 29.2908  
 [P] A young woman is leaping in midair on a skateboard.  
 [H] A woman is leaping

[LABEL] entailment      [PRED] entailment      [COEFF] 26.5100  
 [P] A woman talks to two other women and a man with notepads in an office building with large windows.  
 [H] A woman is talking

[LABEL] entailment      [PRED] entailment      [COEFF] 26.1563  
 [P] A fat kid is floating on pool noodles.  
 [H] A kid is floating

[LABEL] entailment      [PRED] entailment      [COEFF] 26.1437  
 [P] A boy smiles in front of a stony wall in a city.  
 [H] A boy is smiling

[LABEL] entailment      [PRED] entailment      [COEFF] 26.0318  
 [P] A young man leaps through the air from a rocky mountaintop.  
 [H] A man is jumping

[LABEL] entailment      [PRED] entailment      [COEFF] 25.6633  
 [P] A man watches a young child coloring with her crayola crayons.  
 [H] A child is coloring

[LABEL] entailment      [PRED] entailment      [COEFF] 24.1562  
 [P] A child in a blur shirt playing in a flower bed.  
 [H] A child is playing

[LABEL] entailment      [PRED] entailment      [COEFF] 24.1478  
 [P] A little girl messing around with a tripod while being watched by a woman.  
 [H] A girl is messing around

[LABEL] entailment      [PRED] entailment      [COEFF] 24.0932  
 [P] A man plays a yellow guitar while a cat watches him.  
 [H] A man is playing a guitar

[LABEL] entailment      [PRED] entailment      [COEFF] 23.6004  
 [P] A lady talking on her cellphone.  
 [H] A lady is talking

[LABEL] entailment [PRED] entailment [COEFF] 23.2626  
[P] A baby playing in a toy  
[H] A baby is playing

[LABEL] entailment [PRED] entailment [COEFF] 22.5200  
[P] A woman holds a child dressed in blue.  
[H] A woman is holding a child

## 1.218 Component 217

[LABEL] contradiction [PRED] contradiction [COEFF] 4.3288  
[P] Men are dancing in the street  
[H] A group of men playing a game of poker at a table.

[LABEL] contradiction [PRED] contradiction [COEFF] 4.1385  
[P] Young asian woman takes nap in a workshop at a messy desk.  
[H] The woman going for a shopping.

[LABEL] contradiction [PRED] contradiction [COEFF] 4.0261  
[P] People are sitting and drinking wine at tables.  
[H] People throw beer cans at a red truck.

[LABEL] contradiction [PRED] contradiction [COEFF] 4.0093  
[P] People wearing hats are ordering food outside.  
[H] There are people pumping gas outside.

[LABEL] contradiction [PRED] contradiction [COEFF] 3.9887  
[P] A black person in a white shirt and headscarf is plowing a field behind two yoked cattle, one tan and one dark brown, with blue - painted horns.  
[H] A person is lounging by the pool.

[LABEL] contradiction [PRED] contradiction [COEFF] 3.8531  
[P] Two males play table tennis inside a building.  
[H] Two men sit at a table eating lunch.

[LABEL] contradiction [PRED] contradiction [COEFF] 3.7406  
[P] Gentleman playing an accordion on a boardwalk adjacent to boating docs.  
[H] Men sitting around a table playing cards.

[LABEL] contradiction [PRED] contradiction [COEFF] 3.7299  
[P] A man holding a paddle is standing in front of a yellow kayak.  
[H] A woman is frying some food.

[LABEL] contradiction [PRED] contradiction [COEFF] 3.6444  
[P] Four people with orange safety vest in a field hunting.  
[H] People are running in a gymnasium.

[LABEL] **contradiction** [PRED] **contradiction** [COEFF] 3.6025

[P] A caravan of snowmobile travel through the snow.

[H] A man is selling hot dogs.

[LABEL] **contradiction** [PRED] **contradiction** [COEFF] 3.4339

[P] A woman is knitting while sitting down at a table.

[H] A woman is playing checkers.

[LABEL] **contradiction** [PRED] **contradiction** [COEFF] 3.3815

[P] A soccer game, with a huge crowd in the background.

[H] A polo player making a shot.

[LABEL] **contradiction** [PRED] **contradiction** [COEFF] 3.3216

[P] A group of men, blind folded, walking down the street.

[H] A group of kids are romping on a playground.

[LABEL] **contradiction** [PRED] **contradiction** [COEFF] 3.3092

[P] A golfer, wearing all brown, takes a swing towards the trees on a golf course.

[H] A man starts to fish.

[LABEL] **contradiction** [PRED] **contradiction** [COEFF] 3.2755

[P] A mustached man wearing a dark gray shirt plays an accordion.

[H] A man is playing an electric guitar.

[LABEL] **contradiction** [PRED] **contradiction** [COEFF] 3.2734

[P] Two costumed women holding a poster entitled " prom night ".

[H] 'anaconda'cosplayers are holding a giant snake at the convention.

## 1.219 Component 218

[LABEL] **entailment** [PRED] **entailment** [COEFF] 14.9386

[P] Old lady working so hard.

[H] Old lady working hard

[LABEL] **entailment** [PRED] **entailment** [COEFF] 11.4068

[P] Football team hard at work.

[H] The football team is working hard.

[LABEL] **entailment** [PRED] **entailment** [COEFF] 10.7821

[P] A woman is looking at colorful item in an alleyway while some men are next to a cart and seeing what is available.

[H] Woman looking at something colorful in an alley.

[LABEL] **entailment** [PRED] **entailment** [COEFF] 9.7810

[P] Two monks walking together.

[H] Two monks are walking together

|                                                                      |                   |                |
|----------------------------------------------------------------------|-------------------|----------------|
| [LABEL] entailment                                                   | [PRED] entailment | [COEFF] 9.6945 |
| [P] A bunch of kids playing with water.                              |                   |                |
| [H] Kids playing with water                                          |                   |                |
|                                                                      |                   |                |
| [LABEL] entailment                                                   | [PRED] entailment | [COEFF] 9.5125 |
| [P] Group of children play together.                                 |                   |                |
| [H] The children are playing together.                               |                   |                |
|                                                                      |                   |                |
| [LABEL] entailment                                                   | [PRED] entailment | [COEFF] 9.2552 |
| [P] A group of people enjoy food.                                    |                   |                |
| [H] The group enjoyed the food.                                      |                   |                |
|                                                                      |                   |                |
| [LABEL] entailment                                                   | [PRED] entailment | [COEFF] 8.9556 |
| [P] A group of ladies smiling for a picture.                         |                   |                |
| [H] Ladies smile for a picture.                                      |                   |                |
|                                                                      |                   |                |
| [LABEL] entailment                                                   | [PRED] entailment | [COEFF] 8.6162 |
| [P] Children in martial arts uniforms stretching out and having fun. |                   |                |
| [H] Children in martial arts uniforms having fun.                    |                   |                |
|                                                                      |                   |                |
| [LABEL] entailment                                                   | [PRED] entailment | [COEFF] 8.4062 |
| [P] Two people riding bikes smile at each other.                     |                   |                |
| [H] Two smiling people are riding bicycles.                          |                   |                |
|                                                                      |                   |                |
| [LABEL] entailment                                                   | [PRED] entailment | [COEFF] 8.0400 |
| [P] People walking in a marathon.                                    |                   |                |
| [H] People walking in a marathon.                                    |                   |                |
|                                                                      |                   |                |
| [LABEL] entailment                                                   | [PRED] entailment | [COEFF] 8.0241 |
| [P] A cheerleader thrown into the air                                |                   |                |
| [H] Cheerleader in air                                               |                   |                |
|                                                                      |                   |                |
| [LABEL] entailment                                                   | [PRED] entailment | [COEFF] 7.9369 |
| [P] A woman riding on a children's toy.                              |                   |                |
| [H] Woman rides on child's toy.                                      |                   |                |
|                                                                      |                   |                |
| [LABEL] entailment                                                   | [PRED] entailment | [COEFF] 7.6028 |
| [P] Women wearing name tags and talking closely.                     |                   |                |
| [H] Women wearing name tags.                                         |                   |                |
|                                                                      |                   |                |
| [LABEL] entailment                                                   | [PRED] entailment | [COEFF] 7.5372 |
| [P] A soccer player running on the field.                            |                   |                |
| [H] The soccer player is running.                                    |                   |                |
|                                                                      |                   |                |
| [LABEL] entailment                                                   | [PRED] entailment | [COEFF] 7.4771 |
| [P] A man and a woman waiting to cross the road.                     |                   |                |

[H] People waiting to cross a road.

## 1.220 Component 219

[LABEL] **contradiction** [PRED] **contradiction** [COEFF] 33.5047

[P] A cook in a black shirt and checkered bandanna cooks on an industrial style stove.

[H] A cook has a white shirt.

[LABEL] **neutral** [PRED] **contradiction** [COEFF] 31.0157

[P] A black dog running on the beach near the shore.

[H] A white dog is running.

[LABEL] **contradiction** [PRED] **contradiction** [COEFF] 28.4239

[P] Three black people dressed in african garb watching something.

[H] The three people are white.

[LABEL] **contradiction** [PRED] **contradiction** [COEFF] 27.8896

[P] A woman in a black dress is speaking to a group of people.

[H] The woman is wearing a white dress.

[LABEL] **contradiction** [PRED] **contradiction** [COEFF] 27.1614

[P] Lady in black hoolahoops on the street.

[H] A lady in white hoolahoops.

[LABEL] **contradiction** [PRED] **contradiction** [COEFF] 26.4912

[P] A black dog is running across a grassy field in front of some bushes.

[H] A white dog is running across a beach in front of some cabanas.

[LABEL] **contradiction** [PRED] **contradiction** [COEFF] 25.3516

[P] Onlookers observe a man in a black t - shirt standing on the outside of a levee.

[H] A man in a white shirt sits on a levee.

[LABEL] **contradiction** [PRED] **contradiction** [COEFF] 24.2911

[P] A person at a table, dressed in a black costume.

[H] The person is dressed in white

[LABEL] **contradiction** [PRED] **contradiction** [COEFF] 23.0187

[P] Woman lying down while holding a black cat.

[H] The white cat bit the woman.

[LABEL] **contradiction** [PRED] **contradiction** [COEFF] 22.9269

[P] A woman is watching a black dog.

[H] A man is watching a white dog

[LABEL] **contradiction** [PRED] **contradiction** [COEFF] 22.7238

[P] A black dog is standing outside in the dark of night.

[H] A white dog is standing outside in the dark of night.

[LABEL] **contradiction** [PRED] **contradiction** [COEFF] 21.6293

[P] A man in a black hat talks to a woman outside.

[H] A man in a white hat is talking to a woman outside.

[LABEL] **contradiction** [PRED] **contradiction** [COEFF] 21.6195

[P] Two black men in u. s. military uniform are on a balcony.

[H] Two white men sit outside.

[LABEL] **contradiction** [PRED] **contradiction** [COEFF] 21.1810

[P] A girl in a orange shirt and a guy in a black shirt are watching a creek.

[H] A man wearing a white shirt.

[LABEL] **contradiction** [PRED] **contradiction** [COEFF] 20.7390

[P] A tall black man playing basketball.

[H] A short white man is trying to dunk the basketball.

[LABEL] **contradiction** [PRED] **contradiction** [COEFF] 20.2210

[P] A black man is standing on the city sidewalk by the mailbox.

[H] The white man by the mailbox.

## 1.221 Component 220

[LABEL] **neutral** [PRED] **neutral** [COEFF] 34.4206

[P] A woman in a white shirt is playing tennis

[H] A woman is playing tennis with her friend.

[LABEL] **neutral** [PRED] **neutral** [COEFF] 33.6534

[P] A small boy plays in the sprinkler.

[H] Boy plays in a sprinkler with his friend

[LABEL] **neutral** [PRED] **neutral** [COEFF] 32.1536

[P] A man receiving shoes as a gift.

[H] A man is receiving shoes as a gift from his wife.

[LABEL] **neutral** [PRED] **neutral** [COEFF] 29.5210

[P] A woman, dressed in a blue skirt, and light colored sweater is sitting on the ground while knitting.

[H] The woman was knitting something for her friend

[LABEL] **neutral** [PRED] **neutral** [COEFF] 28.2310

[P] A young woman is plotting on a drafting table while talking on the phone.

[H] Young woman plotting on table while talking on phone to her friend

[LABEL] **neutral** [PRED] **neutral** [COEFF] 27.7634

[P] A child riding a bike in an area with an overview of a body of water.



[H] A kid rides a bike with his mom.

[LABEL] **neutral** [PRED] **neutral** [COEFF] 27.7196

[P] The guy in the white jacket has a blue hat on.

[H] A guy wearing a hat that his girl friend gave him

[LABEL] **neutral** [PRED] **neutral** [COEFF] 26.9680

[P] A man in an orange shirt walking on a path.

[H] A man in orange is walking with his girlfriend along the path

[LABEL] **neutral** [PRED] **neutral** [COEFF] 26.0910

[P] A man with a striped shirt that has a white bag over his shoulder is standing at a station with speakers about a tv screen and controls under the tv screen.

[H] A man is at the station with his friend.

[LABEL] **neutral** [PRED] **neutral** [COEFF] 26.0239

[P] A man smokes a cigarette on rocks by the beach.

[H] A man is smoking by the beach with friends.

[LABEL] **neutral** [PRED] **neutral** [COEFF] 25.9265

[P] A man with a " used cars " advertisement atop his car drives down the street.

[H] A man is selling used cars to his friends.

[LABEL] **neutral** [PRED] **neutral** [COEFF] 25.8947

[P] A lady in a black shimmery dress talking on cellphone.

[H] A woman talks on a cellphone to her mother.

[LABEL] **neutral** [PRED] **neutral** [COEFF] 25.8283

[P] A man in a red collared shirt holds a gift wrapped box.

[H] A man is holding a gift for his bride.

[LABEL] **neutral** [PRED] **neutral** [COEFF] 25.7869

[P] A young boy is bowling at a bowling alley.

[H] The young boy is bowling with his friends.

[LABEL] **neutral** [PRED] **neutral** [COEFF] 25.6957

[P] A man talks on a cellphone while working.

[H] A man talks to his wife on his cellphone.

[LABEL] **neutral** [PRED] **neutral** [COEFF] 25.5839

[P] A man in a gray shirt and black pants is playing tennis.

[H] A man plays tennis with his wife

## 1.222 Component 221

[LABEL] **neutral** [PRED] **contradiction** [COEFF] 68.2830

[P] A little girl blowing bubbles.

[H] A kid is playing with bubbles.

[LABEL] **entailment** [PRED] **contradiction** [COEFF] 43.5381

[P] Girl screaming with bows in her hair.

[H] A kid is screaming.

[LABEL] **neutral** [PRED] **neutral** [COEFF] 38.4285

[P] The little girl is carrying a pink and blue toy as she walks on the path.

[H] A kid walks through a path with her pink and blue pony toy.

[LABEL] **entailment** [PRED] **entailment** [COEFF] 25.6899

[P] Two women and one man hold babies and one young child sits alone on a dirt floor.

[H] A young kid sitting on the floor.

[LABEL] **entailment** [PRED] **entailment** [COEFF] 25.0049

[P] A young girl is playing outside her house.

[H] A child plays outside her home.

[LABEL] **entailment** [PRED] **entailment** [COEFF] 24.7159

[P] A girl wears a fancy dress and a tiara.

[H] A child is dressed up.

[LABEL] **neutral** [PRED] **entailment** [COEFF] 23.4857

[P] A child dragging her luggage.

[H] A kid pulls a bag.

[LABEL] **neutral** [PRED] **contradiction** [COEFF] 23.4217

[P] A girl on a pink scooter pushes herself down a subdivision sidewalk.

[H] A kid rides home on her trusty electric motor bike.

[LABEL] **entailment** [PRED] **contradiction** [COEFF] 22.7957

[P] Two girls play in the beach.

[H] Kids are playing outside.

[LABEL] **contradiction** [PRED] **entailment** [COEFF] 21.7671

[P] A small girl riding a unicycle.

[H] A teenager rides a unicycle.

[LABEL] **entailment** [PRED] **contradiction** [COEFF] 21.1212

[P] A girl is playing with empty toilet rolls.

[H] A child is playing with garbage.

[LABEL] **entailment** [PRED] **entailment** [COEFF] 20.9101

[P] A little girl is getting splashed by water.

[H] A child is getting splashed by water.

[LABEL] **entailment** [PRED] **entailment** [COEFF] 20.2618

[P] A small child dancing in front a orchestra band.

[H] A kid dances in front of the band.

[LABEL] **entailment** [PRED] **contradiction** [COEFF] 20.0484

[P] A young girl, of perhaps hispanic descent, is standing in an open window surrounded by clothes and outdoor plants.

[H] A kid is inside the building

[LABEL] **entailment** [PRED] **contradiction** [COEFF] 19.4920

[P] Three young girls in arts and crafts room.

[H] The arts and crafts room has three kids in it.

[LABEL] **entailment** [PRED] **contradiction** [COEFF] 18.9996

[P] The girl is blowing out the candles on the chocolate cake.

[H] A child is celebrating their birthday.

### 1.223 Component 222

[LABEL] **contradiction** [PRED] **contradiction** [COEFF] 32.3188

[P] A man on a skateboard doing a jump over concrete.

[H] A man on a bike

[LABEL] **contradiction** [PRED] **contradiction** [COEFF] 30.6238

[P] A boy on a skateboard sliding on a rail.

[H] The boy is on a bike.

[LABEL] **contradiction** [PRED] **contradiction** [COEFF] 30.4137

[P] A shirtless man in jeans skateboards near a concrete wall.

[H] A man rides his bike.

[LABEL] **contradiction** [PRED] **contradiction** [COEFF] 29.9024

[P] A child is riding a skateboard and crying while a man holds his arm.

[H] A child is riding a bike

[LABEL] **contradiction** [PRED] **contradiction** [COEFF] 27.4760

[P] A skateboarder's hair flies through the air.

[H] The skateborder is riding a bike.

[LABEL] **contradiction** [PRED] **contradiction** [COEFF] 26.6181

[P] A man is pulling tricks on his rollerblades in a indoor skate park.

[H] The man is riding a bike.

[LABEL] **contradiction** [PRED] **contradiction** [COEFF] 24.0636

[P] A skater is jumping down the stairs on his skateboard.

[H] The skater is riding a bike.

[LABEL] **contradiction** [PRED] **contradiction** [COEFF] 23.2712  
[P] A skateboarder leaps of steps outside a corporate building.  
[H] A bike rider begins his climb up the mountain.

[LABEL] **contradiction** [PRED] **contradiction** [COEFF] 18.8764  
[P] A skateboarder stalls on the lip of a bowl while his friends watch in the background.  
[H] A bike rider showing off

[LABEL] **contradiction** [PRED] **contradiction** [COEFF] 18.2521  
[P] Two guys are on skateboards in the woods.  
[H] Two guys riding bikes in the grass.

[LABEL] **contradiction** [PRED] **contradiction** [COEFF] 16.9502  
[P] A person wearing a black sweatshirt and red pants is riding on a snowboard on a green box.  
[H] Person riding bike

[LABEL] **contradiction** [PRED] **contradiction** [COEFF] 16.3635  
[P] A person on a skateboard jumps in a curve on the sidewalk.  
[H] The person is on a bicycle.

[LABEL] **contradiction** [PRED] **contradiction** [COEFF] 15.9921  
[P] Man in midair on skateboard  
[H] A man midair on a bmx bike.

[LABEL] **contradiction** [PRED] **contradiction** [COEFF] 15.5670  
[P] A man is skateboarding in a skate park.  
[H] A man is showing his friends how to do bike tricks.

[LABEL] **contradiction** [PRED] **contradiction** [COEFF] 15.3684  
[P] A young man looks down at his skateboard while snow covers the ground and cars on the street.  
[H] A femal rides her bike through hawaii.

[LABEL] **contradiction** [PRED] **contradiction** [COEFF] 14.7902  
[P] A boy with a blue shirt travels on a skateboard past a blockbuster video store on the corner.  
[H] A boy is riding a bike past a supermarket.

## 1.224 Component 223

[LABEL] **neutral** [PRED] **neutral** [COEFF] 87.1575  
[P] A boy flips off a diving board into a pool.  
[H] The boy is in a competition.

[LABEL] **neutral** [PRED] **neutral** [COEFF] 77.6529  
[P] A man in green on a green bike is in the air after jumping off a ramp.  
[H] A man is performing in a bike competition.

[LABEL] **neutral** [PRED] **neutral** [COEFF] 75.3736  
[P] A wakeboarder is leaping into the air whilst holding onto a yellow rope.  
[H] The wakeboarder is in a competition.

[LABEL] **neutral** [PRED] **neutral** [COEFF] 75.1605  
[P] A shirtless man is doing a skateboard trick over a bike rail.  
[H] A man is practicing for a skateboard competition.

[LABEL] **neutral** [PRED] **neutral** [COEFF] 71.5561  
[P] Snow skier flies high through the air.  
[H] The skier is participating in a competition.

[LABEL] **neutral** [PRED] **neutral** [COEFF] 70.8855  
[P] A surfer riding the wave.  
[H] A person riding a wave for a competition.

[LABEL] **neutral** [PRED] **neutral** [COEFF] 69.8389  
[P] A skier, flying through the air, grabs the bottom of his right ski as he looks onward to his landing.  
[H] A skier is competing in a trick competition.

[LABEL] **neutral** [PRED] **neutral** [COEFF] 68.6768  
[P] Swimmer descending into water performing a flip while several women in background look on.  
[H] A swimmer is diving and doing tricks in a competition

[LABEL] **neutral** [PRED] **neutral** [COEFF] 68.0774  
[P] A man is surfing down a hill of sand.  
[H] A man is entered into the sand surfing competition.

[LABEL] **neutral** [PRED] **neutral** [COEFF] 66.9477  
[P] Swimmer descending into water performing a flip while several women in background look on.  
[H] A swimmer performing a flip for a competition.

[LABEL] **neutral** [PRED] **neutral** [COEFF] 64.9782  
[P] Teenager rides through the forest on his mountain bike.  
[H] The teenager is in a bike competition which is held in the forest.

[LABEL] **neutral** [PRED] **neutral** [COEFF] 63.3799  
[P] A child is doing a back flip whilst jumping on a trampoline.  
[H] A child is practicing for a stunt competition.

[LABEL] **neutral** [PRED] **neutral** [COEFF] 62.1649  
[P] A crosscountry skier going through the woods.  
[H] The skier is in a competition.

[LABEL] **neutral** [PRED] **entailment** [COEFF] 61.3353  
[P] A young man with long hair ramps his skateboard into the air.

[H] A young man is in a skateboarding competition.

[LABEL] **neutral** [PRED] **neutral** [COEFF] 61.0165

[P] A young man jumps a bicycle off a sloped wall over a bench.

[H] A man is performing stunts on his bicycle for a competition.

[LABEL] **neutral** [PRED] **neutral** [COEFF] 60.3961

[P] A gymnast in navy sparkly blue warms up for her routine.

[H] The gymnast is at a competition.

## 1.225 Component 224

[LABEL] **contradiction** [PRED] **contradiction** [COEFF] 22.1659

[P] A man is skating through a tunnel.

[H] The man is driving a car.

[LABEL] **contradiction** [PRED] **contradiction** [COEFF] 19.9031

[P] A woman hands something to a street performer dressed in a white gown.

[H] A woman is driving a car.

[LABEL] **contradiction** [PRED] **contradiction** [COEFF] 19.8057

[P] Man walking down sidewalk outside carrying a small child in a strange fashion.

[H] A man and a child driving down the road in their car.

[LABEL] **contradiction** [PRED] **contradiction** [COEFF] 18.9512

[P] A man in blue clothing and a white turban rides a white horse past a vivid green tree and a orange and white house with purple fixtures.

[H] The man is driving a car

[LABEL] **contradiction** [PRED] **contradiction** [COEFF] 18.8961

[P] A couple in black clothes are walking towards a white gate.

[H] The couple are driving a car.

[LABEL] **contradiction** [PRED] **contradiction** [COEFF] 18.7232

[P] A bunch of police officers are standing outside a bus.

[H] The police officers are driving in a car.

[LABEL] **contradiction** [PRED] **contradiction** [COEFF] 18.4882

[P] A person with a construction vest is using a lawn tool to cut hedges off the top of a bush

[H] The man is driving a car.

[LABEL] **contradiction** [PRED] **contradiction** [COEFF] 18.0877

[P] Two people taking a tight turn on motorcycles, the leading motorcycle is purple and the lagging is green.

[H] The people are in cars

[LABEL] **contradiction** [PRED] **contradiction** [COEFF] 17.9973

[P] A woman and young girl hang clothes on the line.

[H] The woman is driving a car.

[LABEL] **contradiction** [PRED] **contradiction** [COEFF] 17.9484

[P] Someone in red on a bike is moving in midair.

[H] Someone is driving their car.

[LABEL] **contradiction** [PRED] **contradiction** [COEFF] 16.6086

[P] A man skateboarding in front of graffiti.

[H] The man is driving his car.

[LABEL] **contradiction** [PRED] **contradiction** [COEFF] 16.2474

[P] A woman walks with a book while talking on a cellphone.

[H] The woman is driving a car.

[LABEL] **contradiction** [PRED] **contradiction** [COEFF] 16.1645

[P] A man wearing a red helmet rides a bike.

[H] A man driving his car on the interstate.

[LABEL] **contradiction** [PRED] **contradiction** [COEFF] 15.9165

[P] An elderly man wearing a hat and jacket is bicycling down a brick paved path while sunlight streams through autumn trees ahead.

[H] A man is driving a sports car.

[LABEL] **contradiction** [PRED] **contradiction** [COEFF] 15.8759

[P] People on a bus are riding by animals.

[H] People are in a car.

[LABEL] **contradiction** [PRED] **contradiction** [COEFF] 15.6398

[P] A man steers a boat through the canal lined with colorful houses with red roofs.

[H] A man driving a car

## 1.226 Component 225

[LABEL] **contradiction** [PRED] **contradiction** [COEFF] 7.9102

[P] Three asian men conversing while sitting against a wall.

[H] Two women are watching tv.

[LABEL] **contradiction** [PRED] **contradiction** [COEFF] 7.0908

[P] Three young men, two riding a motorbike on a busy street, looking at something and smiling.

[H] Four women are walking down a country avenue.

[LABEL] **contradiction** [PRED] **contradiction** [COEFF] 6.6646

[P] A couple of men out jogging.

[H] Women swimming in a pool.

[LABEL] contradiction [PRED] contradiction [COEFF] 6.3195  
[P] Two men in chartreuse jackets and dungarees are working on the roof of a house.  
[H] Two women wearing blue coats and pants work on a roof of a house

[LABEL] contradiction [PRED] contradiction [COEFF] 6.2962  
[P] Three asian men standing under a white umbrella.  
[H] Three women are outside

[LABEL] contradiction [PRED] contradiction [COEFF] 6.2231  
[P] Two men dressed in winter coats are standing outside in the snow in a picnic shelter, getting ready to eat.  
[H] Two women cook dinner in winter

[LABEL] contradiction [PRED] contradiction [COEFF] 6.0226  
[P] Two men in black are clearing brush, one has black gloves and a tattoo, the other is holding a machete.  
[H] Two ladies hold machetes and tattoo each other

[LABEL] contradiction [PRED] contradiction [COEFF] 5.8289  
[P] Man grilling hotdogs, buns, peppers and other foods while another man stands behind him posing.  
[H] Two women are grilling food inside.

[LABEL] contradiction [PRED] contradiction [COEFF] 5.3243  
[P] Three asian men in a kitchen cooking.  
[H] Three women are cooking in a kitchen.

[LABEL] contradiction [PRED] contradiction [COEFF] 5.1263  
[P] Two men trying to man handle a bull by rope.  
[H] Four women trying to pet a bull.

[LABEL] contradiction [PRED] contradiction [COEFF] 4.9779  
[P] A man wearing a red clown nose stand talking to a man holding groceries on a busy city street.  
[H] Two women talking in a grocery store

[LABEL] contradiction [PRED] contradiction [COEFF] 4.8979  
[P] Two boys eating off of a large silver platter.  
[H] There are two women eating.

[LABEL] contradiction [PRED] contradiction [COEFF] 4.8958  
[P] Two slender black men sit at the side of the walkway, with wares to sell.  
[H] Two women are selling fruit on the side of the road.

[LABEL] contradiction [PRED] contradiction [COEFF] 4.8870  
[P] Two women working on a yarn machine.  
[H] Three men dance with fire.

[LABEL] contradiction [PRED] contradiction [COEFF] 4.5871  
[P] A man walking down a sidewalk while a man on the left in blue crosses the street.



[H] Two women are walking down the sidewalk.

[LABEL] **contradiction** [PRED] **contradiction** [COEFF] 4.5454

[P] Two boys got beat up behind a house and left there.

[H] Two girls got beat up

## 1.227 Component 226

[LABEL] **contradiction** [PRED] **contradiction** [COEFF] 39.6128

[P] Two children play on a barrel turned swing.

[H] Some people are swimming in a lake.

[LABEL] **contradiction** [PRED] **contradiction** [COEFF] 32.2233

[P] Several people, one of whom is wearing a bunny costume, playing in a public fountain with balloons nearby.

[H] The people are fishing at a frozen lake.

[LABEL] **contradiction** [PRED] **contradiction** [COEFF] 30.3048

[P] Workers working at a bagel shop.

[H] There are people dancing in the streets.

[LABEL] **contradiction** [PRED] **contradiction** [COEFF] 27.3653

[P] A woman drawing a picture of two children.

[H] Birds are eating

[LABEL] **contradiction** [PRED] **contradiction** [COEFF] 26.8339

[P] Two white men dressed in white and black tae kwon do uniforms, competing with each other on a green and red mat while a team of onlookers watch.

[H] A couple of people are enjoying tea at a sidewalk cafe.

[LABEL] **contradiction** [PRED] **contradiction** [COEFF] 26.0806

[P] Man in black prepares to celebrate his birthday by blowing out the candles on his cake.

[H] A bird is drinking old milk from a pond.

[LABEL] **contradiction** [PRED] **contradiction** [COEFF] 25.9619

[P] The craftsman sits outside working his treadle machine to braid rope.

[H] A woman makes candles out of tree sap

[LABEL] **contradiction** [PRED] **contradiction** [COEFF] 25.7180

[P] A woman dressed in white riding a white bicycle.

[H] Two kids watch gorillas at the zoo.

[LABEL] **contradiction** [PRED] **contradiction** [COEFF] 25.1253

[P] A construction site on the side of the mountain with a bulldozer digging in the ground that is all dirt

[H] A minivan parks at the Safeway store.

[LABEL] contradiction [PRED] contradiction [COEFF] 24.7718

[P] An asian woman is wearing a black graduation cap and gown smiling on a lawn.

[H] Two kids are throwing rocks.

[LABEL] contradiction [PRED] contradiction [COEFF] 23.1779

[P] The woman, in the beret, is in the process of writing information in regard to what she sees in the microscope.

[H] There is a child playing

[LABEL] contradiction [PRED] contradiction [COEFF] 22.7242

[P] The rotc unit is practicing first aid techniques.

[H] People are walking along the beach.

[LABEL] contradiction [PRED] contradiction [COEFF] 22.3770

[P] A pee wee league football player wearing a purple jersey navigates the football past opposing players in white jerseys.

[H] The two teams celebrate with a large pizza.

[LABEL] contradiction [PRED] neutral [COEFF] 22.2752

[P] Several men wearing ornate cultural costumes dance barefooted for people seated at tables.

[H] A group of geese fly through the air

[LABEL] contradiction [PRED] contradiction [COEFF] 22.0761

[P] A heavily tattooed man with a soldier mask is about to hit another man in the face with his elbow during a wrestling match.

[H] Two people relax on a beach

[LABEL] contradiction [PRED] contradiction [COEFF] 22.0556

[P] Female basketball players watching someone make a free throw.

[H] People are walking along the beach.

## 1.228 Component 227

[LABEL] contradiction [PRED] contradiction [COEFF] 99.9465

[P] A girl in an orange jacket walks by a dog on the street.

[H] The girl walked by the cat.

[LABEL] contradiction [PRED] contradiction [COEFF] 99.8941

[P] A black dog on a white carpet next to an orange.

[H] A black cat on a white carpet.

[LABEL] contradiction [PRED] contradiction [COEFF] 94.3408

[P] A brown dog walking in a river with trees in the background

[H] The cat is walking the river.

[LABEL] contradiction [PRED] contradiction [COEFF] 92.0908

[P] A small tan dog runs through the snow.

[H] The cat sits outside in the snow.

[LABEL] **contradiction** [PRED] **contradiction** [COEFF] 90.9513

[P] The tan dog runs through the leaves.

[H] A cat playing with its owner.

[LABEL] **neutral** [PRED] **contradiction** [COEFF] 90.4675

[P] A brown dog jumps in the sand.

[H] There is a cat in the sand.

[LABEL] **contradiction** [PRED] **contradiction** [COEFF] 86.0816

[P] A fluffy, tri - colored dog is running down the road with a paper in its mouth.

[H] A fluffy cat strolls down the street

[LABEL] **contradiction** [PRED] **contradiction** [COEFF] 83.1716

[P] A man poses with his black dog at the top of a mountain.

[H] A man is posing with his cat

[LABEL] **contradiction** [PRED] **contradiction** [COEFF] 82.0926

[P] A tan dog jumps into water.

[H] A cat is in water.

[LABEL] **contradiction** [PRED] **contradiction** [COEFF] 80.6950

[P] A man with a dog.

[H] The man has a cat.

[LABEL] **contradiction** [PRED] **contradiction** [COEFF] 76.9999

[P] A brown dog jumping into the beach

[H] A cat is on the beach

[LABEL] **contradiction** [PRED] **contradiction** [COEFF] 76.8004

[P] A dog makes a faithful leap to catch a green and black frisbee in his mouth.

[H] A cat plays with its owner

[LABEL] **contradiction** [PRED] **contradiction** [COEFF] 75.9592

[P] The black and white dog trots through the dirt.

[H] A cat walk through the dirt.

[LABEL] **contradiction** [PRED] **contradiction** [COEFF] 75.8579

[P] A brown dog has a blue and white ribbon pinned to him, and teal and yellow ribbons behind him.

[H] A cat wins a beauty contest

[LABEL] **contradiction** [PRED] **contradiction** [COEFF] 72.0932

[P] The red - brown dog digs his nose to investigate a holiday gift bag.

[H] The cat digs its nose.

[LABEL] **contradiction** [PRED] **contradiction** [COEFF] 67.7986

[P] Large brown dog runs through a large grassy area.

[H] A small cat runs through a field.

## 1.229 Component 228

[LABEL] **contradiction** [PRED] **contradiction** [COEFF] 18.1775

[P] People are walking down a sidewalk where there is an outdoors market.

[H] No one is near the market.

[LABEL] **contradiction** [PRED] **contradiction** [COEFF] 17.2983

[P] A woman sitting at a desk staring at a computer screen.

[H] There are no people at the office.

[LABEL] **contradiction** [PRED] **contradiction** [COEFF] 16.8171

[P] A man plays guitar in the kitchen while a woman adjusts the dials on a dishwasher.

[H] Nobody is using the dishwasher.

[LABEL] **contradiction** [PRED] **contradiction** [COEFF] 16.3301

[P] Here are ten people skating and one guy without a shirt dancing on concrete in a tree - lined park.

[H] Nobody is outside

[LABEL] **contradiction** [PRED] **contradiction** [COEFF] 16.1192

[P] Runners pass a statue of a man on a horse as spectators look on and take photos.

[H] Nobody is using a camera.

[LABEL] **contradiction** [PRED] **contradiction** [COEFF] 16.0685

[P] A man in black clothing plays electric guitar on stage.

[H] No one is on the stage

[LABEL] **contradiction** [PRED] **contradiction** [COEFF] 15.4769

[P] Two older men using tongs to grab food from a breakfast buffet.

[H] There are no people at the breakfast buffet.

[LABEL] **contradiction** [PRED] **contradiction** [COEFF] 14.9701

[P] A woman with a black hat and blue coat holding a baby goat.

[H] A woman is not wearing anything on her head.

[LABEL] **contradiction** [PRED] **contradiction** [COEFF] 14.8363

[P] Many people lounge in the long grassy lawn of a classically constructed building, many of them on folding chairs.

[H] Nobody is lounging in the grass.

[LABEL] **contradiction** [PRED] **contradiction** [COEFF] 14.8058

[P] Three people are standing in front of a blue wall with graffiti on it, while three metal poles and three green crates are in the foreground.

[H] No one can see graffiti.

[LABEL] contradiction [PRED] contradiction [COEFF] 14.6739  
[P] A woman in a short red dress and black boots stands while playing an electrified red cello.  
[H] No women are outside.

[LABEL] contradiction [PRED] contradiction [COEFF] 14.6612  
[P] The crowd at a game in la takes their seats.  
[H] No one is in the arena

[LABEL] contradiction [PRED] contradiction [COEFF] 14.5780  
[P] A dog's head is in the lap of a person eating off a small plate.  
[H] There are no animals visible here.

[LABEL] neutral [PRED] contradiction [COEFF] 14.3911  
[P] The blue and white car is in the road, with onlookers nearby.  
[H] There is nobody in the blue and white car.

[LABEL] contradiction [PRED] contradiction [COEFF] 14.3194  
[P] Brown and black dogs on snow, showing teeth and barking at each other.  
[H] There are no animals outside

[LABEL] contradiction [PRED] contradiction [COEFF] 14.2420  
[P] 4 people stand outside a photography store  
[H] There is no one at the photography store as it is closed.

### 1.230 Component 229

[LABEL] contradiction [PRED] contradiction [COEFF] 35.2230  
[P] Some children are playing tug - of - war with a rope while an adult assists.  
[H] The children are dead.

[LABEL] contradiction [PRED] contradiction [COEFF] 28.3725  
[P] A chinese man wearing glasses sitting on a chair holding a green beverage.  
[H] The man fell down a hole

[LABEL] neutral [PRED] contradiction [COEFF] 24.7674  
[P] Some ponies and people walk on a busy sidewalk.  
[H] The sidewalk is crumbling.

[LABEL] contradiction [PRED] contradiction [COEFF] 24.1326  
[P] A man in a white shirt, black cap and black shorts is playing tennis.  
[H] The man is dead.

[LABEL] contradiction [PRED] contradiction [COEFF] 24.0135  
[P] A crowd watches as five dogs are judged at a dog show.  
[H] The dogs are dead

[LABEL] contradiction [PRED] contradiction [COEFF] 21.6528

[P] Multiple people around a county fair with several attractions including a fortune telling machine called grandmas prediction.

[H] Its raining out and the fair is canceled.

[LABEL] contradiction [PRED] contradiction [COEFF] 21.6007

[P] People shop in a crowded store

[H] The store is currently closed

[LABEL] contradiction [PRED] contradiction [COEFF] 21.5880

[P] A large crowd is assembled on an outdoor street scene, with toy balloons visible and a woman walking a pink bicycle in the foreground.

[H] The world has ended.

[LABEL] contradiction [PRED] contradiction [COEFF] 19.0359

[P] A van painted in bright blue, pink, and green is driving down the road.

[H] The van was destroyed in the accident.

[LABEL] contradiction [PRED] contradiction [COEFF] 18.6881

[P] A man and a child are walking across some water using stones.

[H] The people are being swept away to their doom

[LABEL] contradiction [PRED] contradiction [COEFF] 18.2803

[P] A large group of football players about to start a game with a large group watching

[H] The football game got cancelled this morning due to 3 feet of water flooding the small town.

[LABEL] neutral [PRED] contradiction [COEFF] 17.1674

[P] A clown with a big hat riding a bicycle.

[H] The clown is dead inside.

[LABEL] contradiction [PRED] contradiction [COEFF] 17.1646

[P] A large group of people in a room, smiling and laughing.

[H] The people are being tortured.

[LABEL] contradiction [PRED] contradiction [COEFF] 16.8886

[P] Two older women in matching blue jackets playing saxophones in front of two large paintings.

[H] The two woman are mortal enemies, and can't stand to be in the same room as each other.

[LABEL] contradiction [PRED] contradiction [COEFF] 16.7439

[P] A man with long, dark hair covering his eyes wears a white and black jacket while grasping a microphone.

[H] The man is completely bald.

[LABEL] contradiction [PRED] contradiction [COEFF] 16.5074

[P] Earth, water and sky make this a great spot a time out.

[H] The cave is dark and dreary.

### 1.231 Component 230

[LABEL] **neutral** [PRED] **neutral** [COEFF] 21.5628

[P] Two men in the kitchen with a pot on the stove.

[H] Two men cook a pot of soup in the kitchen.

[LABEL] **neutral** [PRED] **neutral** [COEFF] 20.0118

[P] A young girl is eating as she sits at a table full of food.

[H] A young girl is eating fruit at a table.

[LABEL] **neutral** [PRED] **neutral** [COEFF] 19.5163

[P] A child is looking at an exhibit.

[H] A child looks at an exhibit of a monkey.

[LABEL] **neutral** [PRED] **neutral** [COEFF] 19.3282

[P] 3 men are working on a boat.

[H] 3 men are working on a crab boat in alaska.

[LABEL] **neutral** [PRED] **neutral** [COEFF] 19.0283

[P] A little girl stares at something with fear in her face.

[H] A little girl stares at a spider with fear in her face.

[LABEL] **neutral** [PRED] **neutral** [COEFF] 18.6776

[P] A young boy in a kitchen is mixing something in a bowl with a spoon.

[H] The young boy is mixing cake batter in a bowl.

[LABEL] **neutral** [PRED] **neutral** [COEFF] 18.0154

[P] A man is playing with his birthday cake.

[H] A man plays with his chocolate birthday cake

[LABEL] **neutral** [PRED] **neutral** [COEFF] 17.8604

[P] A man is bending down to look at something on the sidewalk.

[H] A man is bending down to look at a penny on the sidewalk

[LABEL] **neutral** [PRED] **neutral** [COEFF] 17.8145

[P] Young man practicing for a recital.

[H] Young man practicing for a dance recital.

[LABEL] **neutral** [PRED] **neutral** [COEFF] 17.4886

[P] A woman baking a cake in the kitchen.

[H] A woman is baking a birthday cake.

[LABEL] **neutral** [PRED] **neutral** [COEFF] 17.2682

[P] A male dives for a ball that's flying over a pool.

[H] A male dives for a tennis ball that's flying over a pool.

[LABEL] **neutral** [PRED] **neutral** [COEFF] 16.7199

[P] Two men walking in the street in front of shops.  
[H] Two men walking in the street in front of grocery shops.

[LABEL] **neutral**            [PRED] **neutral**            [COEFF] 16.6963  
[P] A man in an olive green vest is grilling.  
[H] A man in an olive green vest is grilling hot dogs and hamburgers

[LABEL] **neutral**            [PRED] **neutral**            [COEFF] 15.9856  
[P] A woman of middle eastern descent is using a loom.  
[H] A middle eastern woman is using a loom to make a blanket.

[LABEL] **neutral**            [PRED] **neutral**            [COEFF] 15.7772  
[P] A family sits in a conservatory with lawn chairs and has a picnic.  
[H] The family has chicken during their picnic

[LABEL] **neutral**            [PRED] **neutral**            [COEFF] 15.6310  
[P] Two men dig in a cave.  
[H] Two men are digging gold in a cave.

## 1.232 Component 231

[LABEL] **entailment**        [PRED] **entailment**        [COEFF] 40.4123  
[P] A white dog jumps into a swimming pool.  
[H] A dog is jumping.

[LABEL] **entailment**        [PRED] **entailment**        [COEFF] 39.6444  
[P] A dog is jumping over a gate.  
[H] A dog is jumping.

[LABEL] **entailment**        [PRED] **entailment**        [COEFF] 36.5442  
[P] A dog jumps in the woods.  
[H] A dog is jumping.

[LABEL] **entailment**        [PRED] **entailment**        [COEFF] 36.0183  
[P] A white dog jumps really high to get his fribee.  
[H] A dog is jumping.

[LABEL] **entailment**        [PRED] **entailment**        [COEFF] 32.4493  
[P] A man in a gray shirt jumps in the air.  
[H] A man is jumping.

[LABEL] **entailment**        [PRED] **entailment**        [COEFF] 31.6734  
[P] A dog jumps off the stairs.  
[H] A dog is jumping.

[LABEL] **entailment**        [PRED] **entailment**        [COEFF] 31.6241



[P] A boy wearing an orange shirt and brown shorts is jumping.

[H] A boy is jumping.

[LABEL] entailment [PRED] entailment [COEFF] 30.4367

[P] A person in black pants and a black t - shirt jumping on a fountain plaza.

[H] A person is jumping.

[LABEL] entailment [PRED] entailment [COEFF] 29.3139

[P] A dog jumps in the air, catching a frisbee in its mouth.

[H] A dog is jumping

[LABEL] entailment [PRED] entailment [COEFF] 27.8166

[P] A girl in a swimsuit is jumping high, near water.

[H] A girl is jumping

[LABEL] entailment [PRED] entailment [COEFF] 25.7475

[P] The black dog jumps on a cinderblock.

[H] A dog is jumping.

[LABEL] entailment [PRED] entailment [COEFF] 24.3402

[P] A brown and white dog jumping over blue and white poles

[H] The dog is jumping.

[LABEL] entailment [PRED] entailment [COEFF] 24.2928

[P] Children jump off the edge into a pool.

[H] The children are jumping.

[LABEL] entailment [PRED] entailment [COEFF] 24.0880

[P] A man jumping in the air at a beach

[H] A man is jumping

[LABEL] entailment [PRED] entailment [COEFF] 22.9165

[P] A boy in red swimming trunks is jumping into the pool.

[H] The boy is jumping.

[LABEL] entailment [PRED] entailment [COEFF] 21.7364

[P] A dog jumps and catches a blue ball in his mouth.

[H] The dog is jumping.

### 1.233 Component 232

[LABEL] entailment [PRED] entailment [COEFF] 38.1336

[P] Several men are walking and standing in john a. noble facility.

[H] Men are walking and standing.

[LABEL] entailment [PRED] entailment [COEFF] 31.2734

[P] This is an aerial view of people standing around in a crowded room.

[H] This is an aerial view of people standing around

[LABEL] entailment [PRED] entailment [COEFF] 29.5714

[P] Old man standing with white t - shirt and hat.

[H] An old man standing

[LABEL] entailment [PRED] entailment [COEFF] 27.7834

[P] A group of people standing on a vehicle with a large pair of white wings.

[H] There are people standing

[LABEL] entailment [PRED] entailment [COEFF] 27.4963

[P] A woman standing wearing gray holding a black bag.

[H] A woman is standing

[LABEL] entailment [PRED] entailment [COEFF] 26.2534

[P] Two men playing guitars are standing on a stage with lots of equipment surrounding them.

[H] Men playing guitars are standing on a stage with lots of equipment surrounding them.

[LABEL] entailment [PRED] entailment [COEFF] 24.3426

[P] A man standing with his work gloves on and hard hat in hand, looking attentive.

[H] A man is standing.

[LABEL] entailment [PRED] entailment [COEFF] 23.8217

[P] A child standing next to a large tree.

[H] A child is standing

[LABEL] entailment [PRED] entailment [COEFF] 23.2411

[P] A group of people are standing around a table.

[H] The people are standing.

[LABEL] entailment [PRED] entailment [COEFF] 23.1151

[P] Two police officers in bright yellow uniforms are standing and talking to one another.

[H] Two police officers stand and talk to each other.

[LABEL] entailment [PRED] entailment [COEFF] 22.8825

[P] A professionally dressed woman standing at a podium debating or discussing something of importance.

[H] A dressed woman standing at a podium debating.

[LABEL] entailment [PRED] entailment [COEFF] 21.6775

[P] A man standing in a white lab coat with his arm raised.

[H] A man is standing.

[LABEL] entailment [PRED] entailment [COEFF] 21.5223

[P] A man in a green shirt and blue jeans is standing at a crosswalk across from a large building.

[H] Man standing in a crosswalk.

[LABEL] entailment [PRED] entailment [COEFF] 20.4545  
[P] A security officer is standing guard with the help of a white dog.  
[H] The officer is standing guard

[LABEL] entailment [PRED] entailment [COEFF] 20.2784  
[P] Man standing on rock with outstretched hands.  
[H] Man standing on a rock.

[LABEL] entailment [PRED] entailment [COEFF] 19.2147  
[P] A man standing in front of a yellow building  
[H] The man is standing in front of a yellow building.

### 1.234 Component 233

[LABEL] entailment [PRED] entailment [COEFF] 62.0384  
[P] A woman and a man eating at a cafe.  
[H] There are at least two people at a cafe.

[LABEL] entailment [PRED] entailment [COEFF] 45.8843  
[P] A runner in green shoes takes the lead in a race against a runner in red shorts.  
[H] There are at least two people running together.

[LABEL] entailment [PRED] entailment [COEFF] 45.2811  
[P] Two people ride the train.  
[H] At least two people are on a train.

[LABEL] entailment [PRED] entailment [COEFF] 44.0196  
[P] Two woman with headdress talking in the foreground with two men in a different kind of headdress in the background.  
[H] There are at least 2 women.

[LABEL] entailment [PRED] entailment [COEFF] 43.0057  
[P] A jockey with a red helmet is riding a white horse, and a jockey with an orange helmet is riding a brown horse.  
[H] There are at least two horses.

[LABEL] entailment [PRED] entailment [COEFF] 39.3858  
[P] A young woman and man are burying another young man in the sand.  
[H] There are at least three people.

[LABEL] entailment [PRED] entailment [COEFF] 34.7255  
[P] A person wearing a yellow t - shirt, inside a building has on a motorcycle helmet.  
[H] At least one person has on a helmet.

[LABEL] entailment [PRED] entailment [COEFF] 33.0563  
[P] Girls wearing a blue dress holding a thin, long, blue fabric while one girl is smiling and pointing

to the camera.

[H] At least one girl is smiling.

[LABEL] entailment [PRED] entailment [COEFF] 31.1685

[P] Group of girls having fun together.

[H] There is more than one girl.

[LABEL] entailment [PRED] entailment [COEFF] 30.2463

[P] Group of people work on arts and crafts.

[H] There is more than one person.

[LABEL] entailment [PRED] entailment [COEFF] 28.1763

[P] A big black dog chases a big brown dog with a green object in his mouth while another big brown dog tags behind.

[H] There is more than one dog.

[LABEL] entailment [PRED] entailment [COEFF] 27.8686

[P] A man with a tattoo on the left side of his left leg plays a drum set while sitting under yellow lights.

[H] The man has at least one tattoo.

[LABEL] entailment [PRED] entailment [COEFF] 27.7435

[P] A man rides on his bike with one hand and holds a drink with the other.

[H] A man sits on a bike and has at least one hand.

[LABEL] entailment [PRED] entailment [COEFF] 27.2496

[P] A woman walking in a street with a young boy in front of her, and a running man behind her.

[H] There are at least three people on the street at the moment.

[LABEL] entailment [PRED] entailment [COEFF] 27.1426

[P] Two boys are playing soccer in the water at the beach.

[H] There is more than one boy.

[LABEL] entailment [PRED] entailment [COEFF] 26.9816

[P] Two men confer while standing in a front of a stone wall with writing on it, while others sit at outdoor tables in the background.

[H] There's more than one man shown.

## 1.235 Component 234

[LABEL] entailment [PRED] entailment [COEFF] 9.1849

[P] A baseball player has made an intense play to get to a base, while the defender has lost his balance.

[H] A person is playing baseball.

[LABEL] entailment [PRED] entailment [COEFF] 8.8674

[P] A rock band is playing in a dimly lit bar.

[H] There is a band.

[LABEL] entailment [PRED] entailment [COEFF] 8.4059  
[P] This women is enjoying the nice hot summer weather in the tropical while enjoying a nice refreshing drink.  
[H] The woman has a drink.

[LABEL] entailment [PRED] entailment [COEFF] 7.8949  
[P] Group of children playing pin the tail on the donkey at a relay.  
[H] There are children playing.

[LABEL] entailment [PRED] entailment [COEFF] 7.7285  
[P] The number 3 soccer player in a red jersey holding a yellow ball at the side line.  
[H] There is a soccer player holding a ball.

[LABEL] entailment [PRED] entailment [COEFF] 7.7060  
[P] Two kids in red jerseys are playing soccer.  
[H] There are children playing soccer.

[LABEL] entailment [PRED] entailment [COEFF] 7.5041  
[P] A young football player is setting up for a field goal.  
[H] Someone plays football.

[LABEL] entailment [PRED] entailment [COEFF] 7.2739  
[P] The players are resting after a hard game.  
[H] There are players resting.

[LABEL] entailment [PRED] entailment [COEFF] 7.0699  
[P] A group of six people, young and old, are enjoying the beach.  
[H] There are people at the beach.

[LABEL] entailment [PRED] entailment [COEFF] 6.9583  
[P] A young man in a baseball cap plays an electric guitar.  
[H] A young man has a guitar.

[LABEL] entailment [PRED] entailment [COEFF] 6.8826  
[P] Two little kids in strollers have face makeup on like the band " kiss ".  
[H] There are children in strollers.

[LABEL] entailment [PRED] entailment [COEFF] 6.8641  
[P] A person performing a trick on a snowboard that says " lib tech " on the bottom.  
[H] There is a snowboard.

[LABEL] entailment [PRED] entailment [COEFF] 6.7863  
[P] A quattro crane is operating during the train station construction.  
[H] There was a crane being used on the train station.

[LABEL] entailment [PRED] entailment [COEFF] 6.7632

[P] Six young women are playing string instruments such as cellos and violins in a room with wood paneling.  
[H] Six young women are playing instruments.

[LABEL] **entailment** [PRED] **entailment** [COEFF] 6.7386  
[P] This 70's style fashion statement goes well with a garage style " boogie. "  
[H] The 70's had style.

[LABEL] **entailment** [PRED] **entailment** [COEFF] 6.5794  
[P] A man is playing a 5 stringed electrical bass guitar.  
[H] A person has a musical instrument.

### 1.236 Component 235

[LABEL] **contradiction** [PRED] **contradiction** [COEFF] 12.1763  
[P] A person is walking over a very large sand dune.  
[H] A person in the water

[LABEL] **contradiction** [PRED] **contradiction** [COEFF] 10.5312  
[P] A young man does a trick on his skateboard in a somewhat crowded park area.  
[H] A young man diving into a pool.

[LABEL] **contradiction** [PRED] **contradiction** [COEFF] 8.9915  
[P] Children are playing with hula hoops in a group setting.  
[H] The children are swimming

[LABEL] **contradiction** [PRED] **contradiction** [COEFF] 8.8796  
[P] A person jumping off a rock formation in the desert.  
[H] A person is swimming.

[LABEL] **contradiction** [PRED] **contradiction** [COEFF] 8.8129  
[P] A kid standing up on a swing in a park.  
[H] A kid sitting on a bench at the pool.

[LABEL] **contradiction** [PRED] **contradiction** [COEFF] 8.5663  
[P] A young child wearing orange balances on a snowy ledge.  
[H] Billy swims in the ocean.

[LABEL] **neutral** [PRED] **contradiction** [COEFF] 8.3603  
[P] A man sitting on a bench next to his bike.  
[H] A man is sitting on the beach.

[LABEL] **contradiction** [PRED] **contradiction** [COEFF] 8.1855  
[P] A man with red pants holding on to a wall trying to make it sown some small rocks.  
[H] A man is swimming in the ocean.

[LABEL] **contradiction** [PRED] **contradiction** [COEFF] 8.1646

[P] Person in the midst of a ramp jump.

[H] The people are in the ocean.

[LABEL] **contradiction** [PRED] **contradiction** [COEFF] 7.9450

[P] A man in a red shirt is sitting on some grass and fishing.

[H] The man is swimming

[LABEL] **contradiction** [PRED] **contradiction** [COEFF] 7.6590

[P] A family is watching stunt jets in the sky.

[H] A family is watching a boat race.

[LABEL] **neutral** [PRED] **contradiction** [COEFF] 7.5639

[P] A shirtless man leans over a balcony looking platform.

[H] A man looks at the pool.

[LABEL] **neutral** [PRED] **contradiction** [COEFF] 7.3956

[P] A white dog with black spots jumps over a stream.

[H] The dogs playing in the sea.

[LABEL] **contradiction** [PRED] **contradiction** [COEFF] 7.3920

[P] Young skateboarder doing a trick in the park.

[H] Young skateboarder is swimming.

[LABEL] **contradiction** [PRED] **contradiction** [COEFF] 7.2893

[P] Two children playing in the sand.

[H] Humans are playing in water.

[LABEL] **contradiction** [PRED] **contradiction** [COEFF] 7.2665

[P] A man in black laying on a bench with his head on the leg of an elderly gentleman wearing blue jeans.

[H] Two men in a pool.

## 1.237 Component 236

[LABEL] **entailment** [PRED] **entailment** [COEFF] 26.6274

[P] A woman and a man play musical instruments on a city sidewalk.

[H] There are multiple people present.

[LABEL] **entailment** [PRED] **entailment** [COEFF] 25.7909

[P] A man and a woman are seated holding musical instruments while another woman stands at a podium.

[H] There are multiple people present.

[LABEL] **entailment** [PRED] **entailment** [COEFF] 24.3529

[P] Two dogs romp through a meadow of high grasses

[H] There are animals outdoors.

[LABEL] **entailment** [PRED] **entailment** [COEFF] 23.6431

[P] A man and a boy ride a four wheeled vehicle.

[H] There are people in a vehicle.

[LABEL] entailment [PRED] entailment [COEFF] 22.5488

[P] A man and a woman are closely examining a fishing pole together by a large body of water.

[H] There are multiple people present.

[LABEL] entailment [PRED] entailment [COEFF] 21.5455

[P] A man playing a trumpet along side a woman playing a saxophone stand outside in pink hats.

[H] There are people playing instruments.

[LABEL] entailment [PRED] entailment [COEFF] 20.8114

[P] The dogs are playing with a tennis ball in the yard.

[H] There are animals outdoors.

[LABEL] entailment [PRED] entailment [COEFF] 20.0355

[P] Two men playing hockey on the ice.

[H] There are people playing.

[LABEL] entailment [PRED] entailment [COEFF] 19.6395

[P] A group of dogs are playing together in snow.

[H] There are animals in the snow.

[LABEL] entailment [PRED] entailment [COEFF] 19.5460

[P] Two dogs on the beach.

[H] There are animals outdoors.

[LABEL] entailment [PRED] entailment [COEFF] 18.9917

[P] A woman in a purple sweater stands with her arms folded beside several pieces of luggage while two other women stand beside her, looking in her direction.

[H] There are multiple people present.

[LABEL] entailment [PRED] entailment [COEFF] 18.1212

[P] An entertainer stand on one leg, holding up a dog as two goats stand on pedestals in the background.

[H] There are animals with the person.

[LABEL] entailment [PRED] entailment [COEFF] 18.0475

[P] A woman is singing as a man behind her is playing a guitar.

[H] There are people making music.

[LABEL] entailment [PRED] entailment [COEFF] 17.1808

[P] Several people are in an enclosed garden space while a young black boy and another person hold onto a wooden frame of a raised plant bed.

[H] There are multiple people present.

[LABEL] entailment [PRED] entailment [COEFF] 17.1528

[P] A harpist playing aside a flutist.



[H] There are people playing instruments.

[LABEL] entailment [PRED] entailment [COEFF] 15.9946

[P] There are four canoes in the background, beautiful green grass, with three kids standing at the shore of the lake, that is crystal and crisp looking, and there is a redheaded boy wearing a red shirt, red life vest, and is in a yellow kayak, with a double ended yellow paddle.

[H] There are multiple people present.

## 1.238 Component 237

[LABEL] entailment [PRED] entailment [COEFF] 21.0773

[P] A white dog jumping into a pool.

[H] A dog jumping into a pool.

[LABEL] entailment [PRED] entailment [COEFF] 20.7406

[P] A black dog jumping over a hurdle.

[H] A dog jumping over a hurdle.

[LABEL] entailment [PRED] entailment [COEFF] 18.5547

[P] A black dog running in the surf.

[H] A dog is running in the water.

[LABEL] entailment [PRED] entailment [COEFF] 16.2312

[P] A white dog is leaping into a swimming pool.

[H] A dog is jumping into the pool.

[LABEL] entailment [PRED] entailment [COEFF] 15.6588

[P] A black dog is happily running through the grass.

[H] A dog is happily running through grass.

[LABEL] entailment [PRED] entailment [COEFF] 15.4749

[P] A white dog running on dirt.

[H] A dog running

[LABEL] entailment [PRED] entailment [COEFF] 15.4107

[P] A black dog runs with its tongue out.

[H] A dog running.

[LABEL] entailment [PRED] entailment [COEFF] 15.1384

[P] A brown dog is running through tall green grass.

[H] Dog runs through grass

[LABEL] entailment [PRED] entailment [COEFF] 14.8626

[P] The white dog is running on the grass near a small house.

[H] A dog running in the grass

[LABEL] entailment [PRED] entailment [COEFF] 13.5845

[P] A brown dog leaps through the snow in a field.

[H] The dog leaps through the snow.

[LABEL] **entailment** [PRED] **entailment** [COEFF] 13.3810

[P] A young girl sliding down a black pole.

[H] A girl going down the pole.

[LABEL] **entailment** [PRED] **entailment** [COEFF] 12.9406

[P] A brown and white dog standing in a yard.

[H] A dog is in a yard

[LABEL] **entailment** [PRED] **entailment** [COEFF] 12.8074

[P] A white dog running on snow.

[H] A dog running in snow.

[LABEL] **entailment** [PRED] **entailment** [COEFF] 12.4399

[P] The black dog is running through the grass.

[H] The dog is running

[LABEL] **entailment** [PRED] **entailment** [COEFF] 12.2570

[P] Two brown dogs sniff in the grass.

[H] Two dogs are sniffing.

[LABEL] **entailment** [PRED] **entailment** [COEFF] 12.1533

[P] A black dog walks along a marsh's edge.

[H] A dog is walking

## 1.239 Component 238

[LABEL] **contradiction** [PRED] **contradiction** [COEFF] 37.4581

[P] A man standing near a street corner.

[H] A man is indoors

[LABEL] **contradiction** [PRED] **contradiction** [COEFF] 36.7344

[P] A very young girl playing with a bubble - blowing wand, holding a bottle of bubble solution and walking through a park or field.

[H] The girl is indoors.

[LABEL] **contradiction** [PRED] **contradiction** [COEFF] 35.7407

[P] A street with pigeons, a motorcyclist and a woman on a bench.

[H] The woman is indoors.

[LABEL] **contradiction** [PRED] **contradiction** [COEFF] 34.8304

[P] A man on top of a rock to view the world

[H] A man is indoors.

[LABEL] entailment [PRED] contradiction [COEFF] 33.7177  
[P] A crowd of people gathered around the exit while a large ship is featured on the tv screen.  
[H] A group of people are indoors.

[LABEL] contradiction [PRED] contradiction [COEFF] 33.5967  
[P] A baby crawls on asphalt against a blue sky.  
[H] The boy is indoors.

[LABEL] entailment [PRED] contradiction [COEFF] 33.0318  
[P] A young woman works behind the counter at a juice bar.  
[H] The woman is indoors.

[LABEL] contradiction [PRED] contradiction [COEFF] 32.9720  
[P] A man in jeans and black boots tends to a small boat up on blocks on the ramp of a marina.  
[H] The man is indoors.

[LABEL] contradiction [PRED] contradiction [COEFF] 32.2024  
[P] Two men in suits are arm in arm on a street in front of a sidewalk with orange traffic cones.  
[H] The men are indoors.

[LABEL] contradiction [PRED] contradiction [COEFF] 32.1365  
[P] A bunch of people in racing gear and helmets racing bicycles around a corner on wet pavement.  
[H] The people are indoors.

[LABEL] contradiction [PRED] contradiction [COEFF] 31.9364  
[P] A man with a black backpack and a woman with long dark hair and a teal colored shirt standing on some rocks looking at the ocean.  
[H] A man and woman are indoors.

[LABEL] entailment [PRED] contradiction [COEFF] 31.8440  
[P] A nurse holding a needle in a hospital.  
[H] A nurse is indoors.

[LABEL] contradiction [PRED] contradiction [COEFF] 31.5853  
[P] A man is bent over by an old stone wall, looking into his backpack.  
[H] A man is indoors.

[LABEL] contradiction [PRED] contradiction [COEFF] 30.6697  
[P] Three men are walking up hill.  
[H] Three men are indoors.

[LABEL] entailment [PRED] contradiction [COEFF] 29.4508  
[P] Three women at a shopping mall, one has a dog, one is on her cellphone, one is playing with her necklace.  
[H] The three women are indoors.

[LABEL] entailment [PRED] contradiction [COEFF] 29.4182  
[P] A young man sitting at a table in a long room with food counters and customers.

[H] A man is indoors.

## 1.240 Component 239

[LABEL] entailment [PRED] entailment [COEFF] 19.6191

[P] A young man with no shirt on is wearing black pants and sneakers is jumping over a blue skateboard.

[H] The man is in the air.

[LABEL] entailment [PRED] entailment [COEFF] 18.9973

[P] A young woman with a shave head in a brown skirt and sandals walking past a stone building.

[H] There is a person and a structure.

[LABEL] entailment [PRED] entailment [COEFF] 18.7344

[P] A brown and white dog jumping over a red and yellow pole

[H] The animal is in the air.

[LABEL] entailment [PRED] entailment [COEFF] 16.5297

[P] A woman in a black shirt and a bottle of beer standing in between two men with beer bottles wearing white shirts and black ties.

[H] The people have drinks.

[LABEL] entailment [PRED] entailment [COEFF] 16.0579

[P] A little boy stands at a football field and prepares to kick a child's play ball.

[H] There is a person at a place of recreation.

[LABEL] entailment [PRED] entailment [COEFF] 15.7000

[P] A man in a sleek white shirt gazes into the woman's eyes while holding on to the back of her black and pink dress.

[H] A couple are standing close to one another.

[LABEL] entailment [PRED] entailment [COEFF] 15.4876

[P] An intimate setting with low lighting, draped doors and tables with small groups of men and women smiling and drinking.

[H] There are people in the area.

[LABEL] entailment [PRED] entailment [COEFF] 15.3416

[P] The goalie has come out of the goal to steal the puck from the other team.

[H] The people are playing a game.

[LABEL] neutral [PRED] entailment [COEFF] 14.7894

[P] A young ninja jumps into the air.

[H] There is someone fighting.

[LABEL] entailment [PRED] entailment [COEFF] 13.8520

[P] Five men are dressed in yellow and black uniforms and looking up, while one of the men looks to the side and a woman in a beige jacket is holding up a bike in back of them.

[H] A group of people are gathered.

[LABEL] **entailment** [PRED] **entailment** [COEFF] 13.6058

[P] Two men, wearing shorts and t - shirts, playing frisbee in a field.

[H] There are people outside.

[LABEL] **entailment** [PRED] **entailment** [COEFF] 13.5793

[P] A man in a black shirt looks on with a grin while standing in front of two trays holding glasses with a yellow liquid.

[H] There's a person and some containers of liquid.

[LABEL] **neutral** [PRED] **entailment** [COEFF] 13.5399

[P] A man and a woman look up while the man smokes a cigarette.

[H] The people are having a conversation.

[LABEL] **entailment** [PRED] **entailment** [COEFF] 13.5089

[P] Several women walking around in a large paved outdoor area.

[H] There are people outside.

[LABEL] **entailment** [PRED] **entailment** [COEFF] 13.3577

[P] An asian woman, and a black male, walking past the stairs to the subway.

[H] There are people outside.

[LABEL] **entailment** [PRED] **neutral** [COEFF] 13.0518

[P] One man wearing a black hoodie sweatshirt and another wearing a box over his head

[H] There are 2 people here

## 1.241 Component 240

[LABEL] **entailment** [PRED] **entailment** [COEFF] 34.4845

[P] A man in a hooded sweatshirt sitting on a toolbox.

[H] A man is sitting.

[LABEL] **entailment** [PRED] **entailment** [COEFF] 28.9012

[P] A girl sits in a grocery cart next to a loaf of bread.

[H] There is a girl sitting down.

[LABEL] **entailment** [PRED] **entailment** [COEFF] 27.4791

[P] A woman sits hidden in the dried stray awaiting an animal in the wild.

[H] The woman is sitting.

[LABEL] **entailment** [PRED] **entailment** [COEFF] 27.0388

[P] The elderly woman holds the little baby while sitting in a chair.

[H] The woman is sitting.

[LABEL] **entailment** [PRED] **entailment** [COEFF] 25.7663

[P] A boy sitting in the doorway of a house in a slum.

[H] A boy is sitting

[LABEL] entailment [PRED] entailment [COEFF] 22.5720  
[P] A young man rests his feet on a skateboard while sitting on a bench.  
[H] The young man is sitting down.

[LABEL] entailment [PRED] entailment [COEFF] 21.6784  
[P] A man sitting at a table with both hands raised.  
[H] A man is sitting.

[LABEL] entailment [PRED] entailment [COEFF] 21.1738  
[P] A tan woman with black hair sitting beside a blue bucket of flowers and a box while holding some pink flowers.  
[H] The woman is sitting.

[LABEL] entailment [PRED] entailment [COEFF] 20.2552  
[P] Two girls talking while sitting on the stairs.  
[H] The girls are sitting down.

[LABEL] entailment [PRED] entailment [COEFF] 20.2184  
[P] A tacky looking man in sitting on a chair with a black hat on reads a magazine while listening to music.  
[H] A man sitting down

[LABEL] entailment [PRED] entailment [COEFF] 20.0061  
[P] A man sitting on a stool is selling plastic housewares.  
[H] The man is sitting down.

[LABEL] entailment [PRED] entailment [COEFF] 19.2577  
[P] A little boy is sitting in a chair.  
[H] A child is sitting.

[LABEL] entailment [PRED] entailment [COEFF] 19.0144  
[P] Two men with dreadlocks sit on the street while a man in a hat and a man in a leather jacket stand behind them.  
[H] The men are sitting

[LABEL] entailment [PRED] entailment [COEFF] 18.9908  
[P] A man with a beard sits among orange chairs.  
[H] A man is sitting down

[LABEL] entailment [PRED] entailment [COEFF] 18.9732  
[P] A woman sitting on a chair sewing.  
[H] A woman is sitting in a chair.

[LABEL] entailment [PRED] entailment [COEFF] 18.4522  
[P] A man and a little girl are sitting on a sidewalk near a blue bag eating.  
[H] A man and girl are sitting.

## 1.242 Component 241

[LABEL] entailment [PRED] entailment [COEFF] 20.2902

[P] A young woman with blond - hair, wearing a short - sleeve gray shirt and blue jean shorts, prepares food for a barbecue.

[H] A woman is preparing food.

[LABEL] entailment [PRED] entailment [COEFF] 19.3403

[P] A gray - haired woman in a yellow jacket looks at vegetable produce at a farmer's market stall.

[H] A woman is looking at produce.

[LABEL] entailment [PRED] entailment [COEFF] 18.5536

[P] A muscular black man sporting a green, red and white mohawk and white shorts, is flexing his muscles.

[H] A man is flexing his muscles.

[LABEL] entailment [PRED] entailment [COEFF] 18.3182

[P] A white woman wearing a white shirt sitting and looking at her plate of food.

[H] A woman is looking at food.

[LABEL] entailment [PRED] entailment [COEFF] 17.4373

[P] A blond - haired woman with a tennis cap and sports tank top is holding up her left hand and smiling.

[H] A woman is smiling.

[LABEL] entailment [PRED] entailment [COEFF] 16.5310

[P] A woman in a white top and blue shorts is playing tennis.

[H] A woman is playing a sport.

[LABEL] entailment [PRED] entailment [COEFF] 16.0290

[P] A woman in a brown shirt is speaking to someone.

[H] A woman is talking.

[LABEL] entailment [PRED] entailment [COEFF] 15.0453

[P] A man with a black shirt that says " genetic freak " is sleeping on a bus.

[H] A man is sleeping.

[LABEL] entailment [PRED] entailment [COEFF] 14.8424

[P] A woman in a black jacket talks to a man in a white and blue jacket while he reads.

[H] A woman is talking.

[LABEL] entailment [PRED] entailment [COEFF] 14.6272

[P] A blond woman, wearing a white shirt, walks past a sign advertising food and drinks.

[H] A woman walks.

[LABEL] entailment [PRED] entailment [COEFF] 13.8214

[P] A man wearing sunglasses, headphones and a dark coat is walking down the street.

[H] A man is walking.

[LABEL] entailment [PRED] entailment [COEFF] 12.5915

[P] A girl wearing pink goggles is underwater as water escapes in the form of bubbles from her mouth and nose.

[H] A girl is underwater.

[LABEL] entailment [PRED] entailment [COEFF] 12.3069

[P] A man in a tan jumpsuit and baseball cap is operating a heavy piece of machinery.

[H] A man operates heavy machinery.

[LABEL] entailment [PRED] entailment [COEFF] 11.7034

[P] A woman wearing pink pants is sitting on a chair and playing the bass guitar.

[H] A woman is playing music.

[LABEL] entailment [PRED] entailment [COEFF] 11.1424

[P] A woman in a red dress, turban, and microphone raises her hand in a claw motion and makes a growling face at the camera.

[H] A woman is making a face.

[LABEL] entailment [PRED] entailment [COEFF] 11.0616

[P] With white headphones, a bearded young man in a yellow and black outfit rides a bike for selektmail

[H] A man rides a bike

## 1.243 Component 242

[LABEL] contradiction [PRED] neutral [COEFF] 20.0472

[P] Woman walk up an alley with shuttered property on one side.

[H] A woman is attacked in an alley

[LABEL] neutral [PRED] neutral [COEFF] 19.2993

[P] A man in a red shirt getting his haircut by another man.

[H] The man in red is about to be assassinated by mob rivals.

[LABEL] contradiction [PRED] neutral [COEFF] 18.5860

[P] A small group of people looking out over the rail of a parking garage.

[H] A car wreck has happened.

[LABEL] neutral [PRED] neutral [COEFF] 18.2215

[P] In the foreground, a soccer player wearing orange and black moves to intercept two players wearing white uniforms as they run towards the camera in pursuit of the soccer ball while in the background a man in a blue soccer uniform looks on.

[H] As a soccer player moves to intercept, he is making a foul on the play.

[LABEL] contradiction [PRED] neutral [COEFF] 17.8013

[P] People stand around connas store.

[H] A group of thieves attack the store.



[LABEL] **contradiction** [PRED] **neutral** [COEFF] 17.5492  
[P] A woman in a red jacket, with a blue and gold handbag is jumping while smiling on a cobblestone street.  
[H] The woman is about to murder someone

[LABEL] **contradiction** [PRED] **neutral** [COEFF] 16.9993  
[P] Women with white shirt and tattoo next to man with plaid shirt  
[H] A woman plots the murder of the man next to her out of jealousy of her female friend next to her.

[LABEL] **contradiction** [PRED] **neutral** [COEFF] 16.5491  
[P] A group of men are sitting in a bar with drinks on the table.  
[H] Some men are having a bar fight.

[LABEL] **neutral** [PRED] **neutral** [COEFF] 16.4307  
[P] Numerous people are walking down the streets in front of a large, green statue.  
[H] The people walking down the street are in a protest.

[LABEL] **neutral** [PRED] **neutral** [COEFF] 16.1764  
[P] Two people are sitting across from each other at a table with a crowd surrounding them watching.  
[H] The two people are having an argument at a table.

[LABEL] **neutral** [PRED] **neutral** [COEFF] 15.9692  
[P] People walking past a wall with graphite and writing on the wall.  
[H] The wall is vandalized.

[LABEL] **contradiction** [PRED] **neutral** [COEFF] 15.8816  
[P] A man in a field backed by american flags.  
[H] The man is burning the flag.

[LABEL] **contradiction** [PRED] **neutral** [COEFF] 15.5434  
[P] A man in a red and blue baseball uniform is holding a bat on a baseball field in a stadium.  
[H] A man about to get kicked out of a pool for swearing.

[LABEL] **contradiction** [PRED] **neutral** [COEFF] 15.4538  
[P] Three men wearing white safety hats, yellow vests and red pants all sit in lawn chairs around a sand castle.  
[H] The men are screaming at the heavy metal concert.

[LABEL] **neutral** [PRED] **neutral** [COEFF] 15.3048  
[P] Two men with glasses are sitting in the dark facing each other both on computers.  
[H] Two hackers are trying to break a code.

[LABEL] **neutral** [PRED] **neutral** [COEFF] 15.1530  
[P] A man playing a guitar while a couple is listening and watching another man dancing to the music.  
[H] The couple are having a terrible time.

## 1.244 Component 243

[LABEL] **entailment** [PRED] **entailment** [COEFF] 11.9778

[P] Various people are eating at red tables in a crowded restaurant with purple lights.

[H] The people are at a restaurant.

[LABEL] **entailment** [PRED] **entailment** [COEFF] 11.5565

[P] A man who is fishing from a boardwalk is casting his fishing pole over the railing.

[H] A man is fishing.

[LABEL] **entailment** [PRED] **entailment** [COEFF] 11.3011

[P] Two women, one carrying a purse and papers, are standing on a sidewalk.

[H] Women on a sidewalk.

[LABEL] **entailment** [PRED] **entailment** [COEFF] 11.2287

[P] A group of young people gathered around a woman in a gallery of artistic vases.

[H] People are in a gallery.

[LABEL] **entailment** [PRED] **entailment** [COEFF] 11.0921

[P] A man in a striped red shirt leans in his truck's passenger seat and plays with a jacket sleeve.

[H] The man is in a truck.

[LABEL] **entailment** [PRED] **entailment** [COEFF] 9.4834

[P] A man is using a chisel to do wood work on a wooden pole.

[H] The man works on wood.

[LABEL] **entailment** [PRED] **entailment** [COEFF] 9.2630

[P] A woman with a tote bag exchanges conversation with people at a trade show.

[H] A woman is at a trade show.

[LABEL] **neutral** [PRED] **entailment** [COEFF] 8.8039

[P] A welder waiting for the mold to warm in a car assembly company in the city of angeles.

[H] A welder works at a car assembly company.

[LABEL] **entailment** [PRED] **entailment** [COEFF] 8.7664

[P] Seven men wearing construction helmets are working on the railroad track.

[H] Men working on a railroad track.

[LABEL] **entailment** [PRED] **entailment** [COEFF] 8.6523

[P] One kid by the pool with him holding a skimmer, which is inside the pool.

[H] They are by a pool.

[LABEL] **entailment** [PRED] **entailment** [COEFF] 8.5036

[P] The fedex driver listens to the workman in the green hard hat while the equipment to ship is being loaded.

[H] A fedex shipment is being loaded.

[LABEL] **entailment** [PRED] **entailment** [COEFF] 8.5000

[P] The woman is at marketplace buying fish from an arabic person.

[H] A woman buys fish at a market.

[LABEL] **entailment** [PRED] **entailment** [COEFF] 8.2511

[P] Man playing for a baseball team with a blue protective hat and baseball uniform, playing for south carolina, is swinging the bat and missing the ball.

[H] A person playing baseball.

[LABEL] **entailment** [PRED] **entailment** [COEFF] 8.1761

[P] A man and a boy are preparing food to be cooked on the fire.

[H] People preparing a meal.

[LABEL] **entailment** [PRED] **entailment** [COEFF] 8.0399

[P] A heavily bearded man in a cap is playing a banjo.

[H] A man playing an instrument.

[LABEL] **entailment** [PRED] **entailment** [COEFF] 8.0123

[P] The white dog has a ball in its mouth.

[H] A dog has a ball.

## 1.245 Component 244

[LABEL] **contradiction** [PRED] **contradiction** [COEFF] 3.3742

[P] Construction workers hard at work.

[H] Construction workers having a picnic.

[LABEL] **contradiction** [PRED] **contradiction** [COEFF] 3.2473

[P] Two men in white lab coats look at a computer screen.

[H] The men are playing basketball.

[LABEL] **contradiction** [PRED] **contradiction** [COEFF] 3.0111

[P] Two men sitting on chairs and talking.

[H] Two men are dancing.

[LABEL] **contradiction** [PRED] **contradiction** [COEFF] 3.0084

[P] Four women posing for a picture.

[H] Four women are making pasta.

[LABEL] **contradiction** [PRED] **contradiction** [COEFF] 2.8157

[P] Two men rowing in the middle of a body of water.

[H] Two men eating pizza

[LABEL] **contradiction** [PRED] **contradiction** [COEFF] 2.8105

[P] A pair of people playing billiards at a pool table.

[H] Two people playing chess at a table.

[LABEL] contradiction [PRED] contradiction [COEFF] 2.7113

[P] Two men in a crowd taking pictures.

[H] Two men reading novels.

[LABEL] contradiction [PRED] contradiction [COEFF] 2.6456

[P] A small boy jumps into a swimming pool.

[H] A boy is doing his homework.

[LABEL] contradiction [PRED] contradiction [COEFF] 2.6253

[P] A young boy in swim attire steps into the waves.

[H] A little boy riding his tricycle.

[LABEL] contradiction [PRED] contradiction [COEFF] 2.5441

[P] A woman in green uniform skates down the road at the fair.

[H] The lady sits in her recliner and watches tv.

[LABEL] contradiction [PRED] contradiction [COEFF] 2.5346

[P] Two bald boxers are fighting, the one on the left is being punched in the face by the darker - skinned boxer on the right who is throwing a left hook.

[H] Two boxers are hugging and making friends

[LABEL] contradiction [PRED] contradiction [COEFF] 2.5346

[P] Two men in safety vests walk down the road.

[H] Two people are playing cribbage.

[LABEL] contradiction [PRED] contradiction [COEFF] 2.5126

[P] A woman having a nap with her child.

[H] A woman is dancing with her child to motley crue.

[LABEL] contradiction [PRED] contradiction [COEFF] 2.5014

[P] Two women wearing face masks cleaning up some debris.

[H] Two women are dancing.

[LABEL] contradiction [PRED] contradiction [COEFF] 2.4298

[P] Three women in jackets are crossing the street.

[H] Three women are sitting at a dining table.

[LABEL] contradiction [PRED] contradiction [COEFF] 2.4228

[P] Two men are kayaking in whitewater.

[H] Two men are climbing mount everest.

## 1.246 Component 245

[LABEL] contradiction [PRED] contradiction [COEFF] 8.9968

[P] Kid on a trampoline and strapped in at an amusement park.

[H] Kid on a car strapped to the roof.

[LABEL] **contradiction** [PRED] **contradiction** [COEFF] 8.9939  
[P] 2 men running in warm clothing, while another man is biking on a pier in the stormy looking weather.  
[H] Three men are sitting in a car on a sunny day.

[LABEL] **contradiction** [PRED] **contradiction** [COEFF] 7.4841  
[P] Man in a blue shirt walking on a bridge.  
[H] A man is walking on top of a car.

[LABEL] **contradiction** [PRED] **contradiction** [COEFF] 7.2099  
[P] Two people are riding their bikes on a country road as the sun is rising.  
[H] Two people are dancing in the street

[LABEL] **contradiction** [PRED] **contradiction** [COEFF] 7.1812  
[P] A middle - aged guy wearing a baseball cap, black shirt and black pants is using a power tool on a rooftop.  
[H] A man holding a ladder.

[LABEL] **contradiction** [PRED] **contradiction** [COEFF] 7.1790  
[P] A young girl offering a green apple to a horse.  
[H] A goat nibbling a tourist's hip.

[LABEL] **contradiction** [PRED] **contradiction** [COEFF] 7.0808  
[P] A boy jumping off the high diving board.  
[H] A boy jumps off a tower of blocks.

[LABEL] **contradiction** [PRED] **contradiction** [COEFF] 6.7505  
[P] Two bicyclists ride down a hill.  
[H] The people are flying in a plane.

[LABEL] **contradiction** [PRED] **contradiction** [COEFF] 6.6797  
[P] Two men are bike racing, and the man in front is looking behind at the other rider.  
[H] A man is on the bus.

[LABEL] **contradiction** [PRED] **contradiction** [COEFF] 6.5332  
[P] Many two - person kayaks fill a river surrounded by trees.  
[H] People are in a stadium.

[LABEL] **contradiction** [PRED] **contradiction** [COEFF] 6.4349  
[P] Young boy jumping off of a trampoline into a lake.  
[H] A boy running down the road.

[LABEL] **contradiction** [PRED] **contradiction** [COEFF] 6.3216  
[P] A biker in a white helmet is riding on top of some sand by a fence.  
[H] A man drives his car on a farm.

[LABEL] **contradiction** [PRED] **contradiction** [COEFF] 6.2653

[P] A cyclist pedals past yellow fencing and construction markers.  
[H] A person drives a car past a construction site.

[LABEL] **contradiction** [PRED] **contradiction** [COEFF] 6.2567  
[P] Two white men drinking beer out of guinness glasses.  
[H] Two white men smoke pot.

[LABEL] **contradiction** [PRED] **contradiction** [COEFF] 6.2201  
[P] A brown and white dog lays down in a grassy field.  
[H] A cat is in a house.

[LABEL] **contradiction** [PRED] **contradiction** [COEFF] 6.2022  
[P] Three men repairing a rooftop.  
[H] A man fixes a floor.

## 1.247 Component 246

[LABEL] **contradiction** [PRED] **contradiction** [COEFF] 8.6844  
[P] A boy wearing a red shirt runs across the grass with a furry dog.  
[H] A dog is laying on a couch.

[LABEL] **contradiction** [PRED] **contradiction** [COEFF] 8.2028  
[P] Two people preparing meat on a street - side grill with one person wearing a mask as the other leans his head down.  
[H] Two men are sitting on the couch watching television.

[LABEL] **contradiction** [PRED] **contradiction** [COEFF] 8.1473  
[P] A woman and child watching the construction machines across the road.  
[H] A woman and child are laying on the couch.

[LABEL] **contradiction** [PRED] **contradiction** [COEFF] 8.0253  
[P] A woman playing with her dog on a beach.  
[H] A woman laying on the couch with her cat.

[LABEL] **contradiction** [PRED] **contradiction** [COEFF] 7.7000  
[P] A man and woman are working in a garden.  
[H] The couple is sitting on the couch.

[LABEL] **contradiction** [PRED] **contradiction** [COEFF] 7.6278  
[P] A brown dog leaps over the water in a grassy and tree - lined yard.  
[H] A dog is laying on the couch.

[LABEL] **contradiction** [PRED] **contradiction** [COEFF] 7.6149  
[P] Two girls in a park wearing sunglasses.  
[H] Two girls are sitting on a couch playing video games.

[LABEL] contradiction [PRED] contradiction [COEFF] 7.4849

[P] A black dog with a red collar walks through the grass with his mouth open and tongue hanging out.

[H] The dog is laying down on the couch with his tongue out

[LABEL] contradiction [PRED] contradiction [COEFF] 7.3281

[P] A small kid wearing red and gray is opening a gray and white striped gift while sitting on a man's lap who is wearing a blue shirt and both are in front of a window and a small christmas tree.

[H] The small kid opening the gift is sitting on a couch.

[LABEL] contradiction [PRED] contradiction [COEFF] 7.3080

[P] The man sitting on the blue bench has a blanket covering his head.

[H] A man is sleeping on the couch.

[LABEL] contradiction [PRED] contradiction [COEFF] 7.1277

[P] A couple, holding hands, walking past a parking lot.

[H] The couple is sitting on the couch.

[LABEL] contradiction [PRED] contradiction [COEFF] 7.1222

[P] A man in a cap and white shirt is cutting some fish on a boat that is floating on water next to a wooden dock.

[H] A man sleeps on the couch

[LABEL] contradiction [PRED] contradiction [COEFF] 6.8871

[P] Two men sit at a diner, one reading a newspaper, the other smoking a cigarette.

[H] The men are at home sitting on the couch.

[LABEL] contradiction [PRED] contradiction [COEFF] 6.6277

[P] A man cutting his beard outside on the driveway as another person holds a mirror.

[H] Two men are sitting on the couch watching espn.

[LABEL] contradiction [PRED] contradiction [COEFF] 6.4965

[P] A boy in a swimsuit slides along a stretch of wet plastic.

[H] A boy is on the couch

[LABEL] contradiction [PRED] contradiction [COEFF] 6.1855

[P] A young woman jumps from one bench to another.

[H] A girl is sitting on her couch.

## 1.248 Component 247

[LABEL] contradiction [PRED] contradiction [COEFF] 5.8045

[P] Two army soldiers and a woman talking in an office.

[H] The army soldiers are flying in a plane.

[LABEL] contradiction [PRED] contradiction [COEFF] 5.6048

[P] A smiling woman stands in front of a body of water with water birds.

[H] A woman is on a train.

[LABEL] **contradiction** [PRED] **contradiction** [COEFF] 5.5109  
[P] A male figure in a long - sleeve shirt and suspenders is standing in the entry to a black train.  
[H] There is a man on a plane.

[LABEL] **contradiction** [PRED] **contradiction** [COEFF] 5.3397  
[P] Sailor welcoming passengers onto boat.  
[H] The people are boarding an airplane.

[LABEL] **contradiction** [PRED] **contradiction** [COEFF] 5.2902  
[P] Model posing against a white wall.  
[H] The model is on a plane sleeping

[LABEL] **contradiction** [PRED] **contradiction** [COEFF] 5.2523  
[P] Two women and one man skipping or dancing down a road while onlookers watch.  
[H] The people are flying a plane

[LABEL] **contradiction** [PRED] **contradiction** [COEFF] 5.1903  
[P] A bearded traveler in a red shirt sitting in a car and reading a map.  
[H] The bearded traveler is on an airplane.

[LABEL] **contradiction** [PRED] **contradiction** [COEFF] 4.8537  
[P] Four people sitting in branches on a tree.  
[H] The people are in an airplane.

[LABEL] **contradiction** [PRED] **contradiction** [COEFF] 4.8147  
[P] A boat with people and their belongings is in the water.  
[H] A group of people board a plane.

[LABEL] **contradiction** [PRED] **contradiction** [COEFF] 4.6422  
[P] A baby is sitting outside in grass.  
[H] A baby is sleeping on a plane.

[LABEL] **contradiction** [PRED] **contradiction** [COEFF] 4.6295  
[P] A man is walking in front of a building with an arrow pointing in the opposite direction.  
[H] The man is flying an airplane.

[LABEL] **contradiction** [PRED] **contradiction** [COEFF] 4.5442  
[P] A man reading a newspaper next to a train.  
[H] The man is reading a newspaper on the plane.

[LABEL] **contradiction** [PRED] **contradiction** [COEFF] 4.4767  
[P] People are walking around baby elephant model displays.  
[H] The people are on an airplane.

[LABEL] **contradiction** [PRED] **contradiction** [COEFF] 4.4276  
[P] A young child in a red shirt is chewing a stem of grass and there is a horse in the background.



[H] A young child is flying a space ship.

[LABEL] **contradiction** [PRED] **contradiction** [COEFF] 4.3211

[P] A man is taking a nap in the train.

[H] A man reading a book on an airplane.

[LABEL] **contradiction** [PRED] **contradiction** [COEFF] 4.3138

[P] A man dressed in gold with his gold bike stops to look at the city.

[H] A man is flying an airplane over the city.

## 1.249 Component 248

[LABEL] **contradiction** [PRED] **contradiction** [COEFF] 35.5621

[P] A baby in a blue outfit, wrapped in a blanket, is sucking on her pacifier while laying down.

[H] A baby is laying down in a red outfit.

[LABEL] **contradiction** [PRED] **contradiction** [COEFF] 30.8585

[P] A boy in a blue jacket on a subway train.

[H] A boy in a red jacket on the subway platform.

[LABEL] **contradiction** [PRED] **contradiction** [COEFF] 29.4634

[P] The girl in the blue coat is holding a purple capped water bottle.

[H] The girl is in a red coat.

[LABEL] **contradiction** [PRED] **contradiction** [COEFF] 28.5979

[P] There is a group of five men in dark blue outfits and one is playing an accordion.

[H] The men are wearing red outfits.

[LABEL] **contradiction** [PRED] **contradiction** [COEFF] 26.9504

[P] A baby in a blue shirt is in a swing.

[H] A baby in a red shirt is in a swing.

[LABEL] **contradiction** [PRED] **contradiction** [COEFF] 26.9102

[P] Girl in blue coverall painting

[H] The girl is wearing red coveralls.

[LABEL] **contradiction** [PRED] **contradiction** [COEFF] 25.5134

[P] A boy in a blue shirt is lining up a shot in a game of pool.

[H] A boy in a red shirt plays pool.

[LABEL] **contradiction** [PRED] **contradiction** [COEFF] 25.3458

[P] A man wearing a blue sweater and collared undershirt is playing the board game risk

[H] The man is wearing a red shirt.

[LABEL] **contradiction** [PRED] **contradiction** [COEFF] 24.8116

[P] Man with a blue box on wheels smiling at the boys playing around him.

[H] The man was carrying a red box.

[LABEL] **contradiction** [PRED] **contradiction** [COEFF] 23.8696

[P] A man in a blue shirt walking out a door.

[H] A man in a red shirt is climbing through a window.

[LABEL] **contradiction** [PRED] **contradiction** [COEFF] 23.2542

[P] A lady is standing in a crowd and is wearing a blue shirt.

[H] A lady in a red shirt

[LABEL] **contradiction** [PRED] **contradiction** [COEFF] 23.1703

[P] A young woman wearing a blue button shirt over a white shirt holds a microphone in her right hand.

[H] A woman wearing a red shirt is dancing

[LABEL] **contradiction** [PRED] **contradiction** [COEFF] 22.3865

[P] A little kid in a blue coat watching ducks swim.

[H] A child in a red onesie.

[LABEL] **contradiction** [PRED] **contradiction** [COEFF] 21.5930

[P] In a public area, a young girl in a pink dress sits next to an older woman who works a primitive device to make brown thread.

[H] A young girl is wearing a red dress.

[LABEL] **contradiction** [PRED] **contradiction** [COEFF] 21.5526

[P] A little boy in a green shirt holds a blue umbrella in front of a doorway framed by orange signs with asian writing on them.

[H] The shirt is red.

[LABEL] **contradiction** [PRED] **contradiction** [COEFF] 21.3741

[P] A young boy in jeans and a blue shirt is wearing a blue helmet.

[H] A young boy is wearing a red shirt and a green helmet.

## 1.250 Component 249

[LABEL] **entailment** [PRED] **entailment** [COEFF] 12.4719

[P] Two men, both wearing black outfits with red stripes are engaging in some sort of fighting style using canes.

[H] The men are fighting with canes

[LABEL] **entailment** [PRED] **entailment** [COEFF] 12.2202

[P] One girl is standing with her back towards us, with another girl sitting down next to her, both looking out toward the water.

[H] The girls are looking toward the water.

[LABEL] **entailment** [PRED] **entailment** [COEFF] 10.7609

[P] Two men play guitar among a group of people on a boat.

[H] The men are playing guitar on a boat.

[LABEL] entailment [PRED] entailment [COEFF] 10.2734  
[P] An aerial view is on the top of two women, one older, one younger, who seem to be making something to eat at a public showcase.  
[H] Two woman are making something to eat.

[LABEL] entailment [PRED] entailment [COEFF] 10.2658  
[P] A few people are sitting on a bench.  
[H] The peoples are sitting on a bench

[LABEL] entailment [PRED] entailment [COEFF] 9.8735  
[P] A woman wearing black is balancing a fishbowl on her head.  
[H] The woman has a fishbowl on her head.

[LABEL] entailment [PRED] entailment [COEFF] 9.3544  
[P] A brown dog and two white dogs are bounding after a ball.  
[H] The dogs are bounding after a ball.

[LABEL] entailment [PRED] entailment [COEFF] 9.0548  
[P] A group of people, the majority of whom are male, are standing at the foot of a flight of stairs looking up.  
[H] The people are looking up.

[LABEL] entailment [PRED] entailment [COEFF] 8.9519  
[P] A crowd of people are gathered outside watching a performer.  
[H] The crowd is watching a performer.

[LABEL] entailment [PRED] entailment [COEFF] 8.9185  
[P] A young male child, wearing light tan shorts and a bright green shirt, is feeding a snack to a zoo animal.  
[H] The male child is feeding a zoo animal.

[LABEL] entailment [PRED] entailment [COEFF] 8.8460  
[P] A child sleeping on the concrete on some sort of blanket covered with coats.  
[H] The sleeping child is covered with coats.

[LABEL] entailment [PRED] entailment [COEFF] 8.8457  
[P] A man in a plaid shirt is looking at flowers.  
[H] The man looks at flowers.

[LABEL] entailment [PRED] entailment [COEFF] 8.8381  
[P] A group of people are enjoying themselves at a table.  
[H] The group of people are enjoying themselves

[LABEL] entailment [PRED] entailment [COEFF] 8.5091  
[P] A lady with a look of surprise on her face looking at the camel.  
[H] The lady is looking at the camel.

[LABEL] entailment [PRED] entailment [COEFF] 7.9106

[P] People standing near water one is wearing yellow and one is in purple.

[H] People are wearing yellow and purple.

[LABEL] entailment [PRED] entailment [COEFF] 7.8534

[P] Many people are gathered around the street watching two street performers.

[H] Many people are watching street performers

## 1.251 Component 250

[LABEL] neutral [PRED] neutral [COEFF] 21.9266

[P] A boy in a green baseball jersey with yellow lettering, lunges forward, his baseball mitt open and ready to receive the approaching baseball.

[H] The boy is the all star player on his team.

[LABEL] neutral [PRED] neutral [COEFF] 21.6502

[P] A man wearing a baseball hat pitches a ball towards home base.

[H] A man is winning the baseball game.

[LABEL] neutral [PRED] neutral [COEFF] 20.9214

[P] An elementary schoolgirls soccer team is practicing on the field.

[H] Girls will win the soccer game

[LABEL] neutral [PRED] neutral [COEFF] 18.5848

[P] Two boxers are ready for their fight as the crowd watches with anticipation.

[H] Every person in the crowd has bet money on the boxing match.

[LABEL] neutral [PRED] neutral [COEFF] 17.9266

[P] A boy in a soccer uniform running in a field during a game.

[H] The boy is winning.

[LABEL] neutral [PRED] neutral [COEFF] 17.4793

[P] A person on a snowboard jumps over a cliff in the snow.

[H] A snowboarder competes for gold in the olympics.

[LABEL] neutral [PRED] neutral [COEFF] 17.4612

[P] A man is jumping on a sheet of ice near a lake with a video camera in his hand.

[H] A man creating a soon to be viral video.

[LABEL] neutral [PRED] neutral [COEFF] 17.2623

[P] They are playing ice - hockey.

[H] The home team is currently winning the game.

[LABEL] neutral [PRED] neutral [COEFF] 16.9879

[P] One man in red shirt and black pants with a man in white shirt and tan shorts, golfing.

[H] The man in the red shirt is winning the golf match.

[LABEL] **neutral** [PRED] **neutral** [COEFF] 16.7106  
[P] A male athlete wearing a white shirt and white pants is running past the crowd while holding a golden torch.  
[H] The athlete won the olympics.

[LABEL] **neutral** [PRED] **neutral** [COEFF] 16.6844  
[P] A man with long hair rides a skateboard through a basketball court.  
[H] The basketball players stood in astonishment as the brazen man rode his skateboard right through the middle of them.

[LABEL] **neutral** [PRED] **neutral** [COEFF] 16.3851  
[P] A male hockey player in a bright purple uniform skates across the ice with a hockey stick and a puck.  
[H] The player is going to make the game winning shot.

[LABEL] **neutral** [PRED] **neutral** [COEFF] 16.3652  
[P] Two girls dance as a small band jams on their brass instruments.  
[H] The girls are happily dancing to the song they requested.

[LABEL] **neutral** [PRED] **neutral** [COEFF] 16.3429  
[P] A skier is airborne with his skis crossed.  
[H] The world champion ski jumper is about to beat the world record with this jump!

[LABEL] **neutral** [PRED] **neutral** [COEFF] 15.8707  
[P] A man wearing a white head wrap is peeling the green outer layer off some sort of tropical fruit.  
[H] The man is going to eat the entire fruit.

[LABEL] **neutral** [PRED] **neutral** [COEFF] 15.6751  
[P] A band appears to be playing bluegrass music at an indoor musical event.  
[H] A bluegrass band is playing the best song ever inside.

## 1.252 Component 251

[LABEL] **contradiction** [PRED] **contradiction** [COEFF] 12.6600  
[P] A man stands in a green garden with large flowers around him.  
[H] A man is sleeping

[LABEL] **contradiction** [PRED] **contradiction** [COEFF] 10.6206  
[P] A man with brown hair is holding a guitar.  
[H] The man is sleeping.

[LABEL] **contradiction** [PRED] **contradiction** [COEFF] 10.4922  
[P] A man is walking across a soccer field dressed in red and white.  
[H] The man is sleeping

[LABEL] **contradiction** [PRED] **contradiction** [COEFF] 10.1156  
[P] A man in blue makes his way through a crowd during a race.

[H] A man is sleeping.

[LABEL] contradiction [PRED] contradiction [COEFF] 10.0876

[P] A woman in a red devil costume in front of a fountain.

[H] A woman is sleeping.

[LABEL] contradiction [PRED] contradiction [COEFF] 9.9080

[P] A man jumps up while another man with a blue hat watches.

[H] Both men are sleeping

[LABEL] contradiction [PRED] contradiction [COEFF] 9.3817

[P] An asian woman standing in a crowded urban area listening to music.

[H] A woman is sleeping

[LABEL] contradiction [PRED] contradiction [COEFF] 9.2455

[P] A goalie in a white uniform dives to grab a soccer ball.

[H] The goalie is sleeping.

[LABEL] contradiction [PRED] contradiction [COEFF] 8.4950

[P] A group of young adults raise their hands.

[H] A group of adults are sleeping.

[LABEL] contradiction [PRED] contradiction [COEFF] 8.4933

[P] A man is standing in a doorway in the city, near a garage door covered with graffiti.

[H] A man is sleeping.

[LABEL] contradiction [PRED] contradiction [COEFF] 8.2580

[P] A dog attacking a guy.

[H] A dog is sleeping

[LABEL] contradiction [PRED] contradiction [COEFF] 8.0345

[P] A man in a green outfit shows off his red motorcycle for a crowd

[H] A man is sleeping.

[LABEL] contradiction [PRED] contradiction [COEFF] 7.8751

[P] A black and white dog is splashing around in the water.

[H] The dog was sleeping.

[LABEL] contradiction [PRED] contradiction [COEFF] 7.7555

[P] A man is doing a trick with a sword and allowing the sword into his throat.

[H] A man is sleeping.

[LABEL] contradiction [PRED] contradiction [COEFF] 7.5968

[P] Two teenage girls arm wrestle while a third girl watches.

[H] The girls are sleeping.

[LABEL] contradiction [PRED] contradiction [COEFF] 7.4255

[P] A man on a bike is riding along the side of a country road  
[H] A man is sleeping.

### 1.253 Component 252

[LABEL] **contradiction** [PRED] **contradiction** [COEFF] 12.9534

[P] A young blond boy holds a mallet in front of his face.

[H] A boy dropped the mallet.

[LABEL] **neutral** [PRED] **contradiction** [COEFF] 8.6232

[P] A child stoops to the sidewalk to pick up his toy phone.

[H] A child dropped the toy phone because he / she was upset.

[LABEL] **contradiction** [PRED] **contradiction** [COEFF] 8.4758

[P] Someone with a pink shirt and blue helmet climbing a rock wall.

[H] An old man falling off a rock wall.

[LABEL] **neutral** [PRED] **contradiction** [COEFF] 8.1882

[P] Basketball players jumping up for the ball during a game.

[H] The referee threw the ball

[LABEL] **contradiction** [PRED] **contradiction** [COEFF] 8.1258

[P] Man sitting on a ledge wearing a green celtics shirt while eating.

[H] Man falling off of ledge in celtics shirt.

[LABEL] **contradiction** [PRED] **contradiction** [COEFF] 7.9547

[P] A child holding a large toothbrush.

[H] The child is dropping the toothbrush.

[LABEL] **contradiction** [PRED] **contradiction** [COEFF] 7.6410

[P] A tan dog and a little girl kiss.

[H] The dog runs away from the girl.

[LABEL] **contradiction** [PRED] **contradiction** [COEFF] 7.5903

[P] Two young children in front of a firetruck.

[H] Kids run away from a fire.

[LABEL] **contradiction** [PRED] **contradiction** [COEFF] 7.4976

[P] Two workers in their hard hats and safety vests stand near a yellow block of concrete.

[H] Two workers strip off their work clothes and leave in protest.

[LABEL] **entailment** [PRED] **contradiction** [COEFF] 7.1740

[P] A white truck is parked on the side of a highway.

[H] A truck pulled off the highway.

[LABEL] **neutral** [PRED] **contradiction** [COEFF] 6.9180

[P] A group of people hold on to a long skinny object.

[H] A group of people let go of the object

[LABEL] **contradiction** [PRED] **contradiction** [COEFF] 6.7201

[P] Two racing dogs run around a track.

[H] The two dogs are walking away from the track.

[LABEL] **contradiction** [PRED] **contradiction** [COEFF] 6.4423

[P] A woman wearing orange stands in a crowd and talks on the phone.

[H] A woman lost her phone in the crowd and is searching for it.

[LABEL] **contradiction** [PRED] **contradiction** [COEFF] 6.2034

[P] A female figure skater on one leg with the other high up in the air as her arms are spread open wide.

[H] A figure skater fell on the ground

[LABEL] **contradiction** [PRED] **contradiction** [COEFF] 6.1699

[P] Dog splashing in water toward a red ball.

[H] The dog throws the ball down the cliff.

[LABEL] **neutral** [PRED] **contradiction** [COEFF] 6.0494

[P] Hockey goalie is reaching towards the puck.

[H] The goalie is blocking the puck from the goal.

## 1.254 Component 253

[LABEL] **entailment** [PRED] **entailment** [COEFF] 35.6579

[P] A man in a black robe is walking into a old building.

[H] The man is walking.

[LABEL] **entailment** [PRED] **entailment** [COEFF] 35.2867

[P] A woman in a red shirt walking out onto a sidewalk.

[H] A woman is walking

[LABEL] **entailment** [PRED] **entailment** [COEFF] 34.6586

[P] A woman in all white walking down the street.

[H] The woman is walking.

[LABEL] **entailment** [PRED] **entailment** [COEFF] 30.5839

[P] An asian couple is walking through a store.

[H] The couple is walking.

[LABEL] **entailment** [PRED] **entailment** [COEFF] 30.2049

[P] People walking in front of heavily painted wall.

[H] People are walking

[LABEL] **entailment** [PRED] **entailment** [COEFF] 29.4596



[P] A man in a leather coat is walking down a brick sidewalk next to a woman wearing a colorful blue dress.

[H] The man is walking.

[LABEL] **entailment** [PRED] **entailment** [COEFF] 29.4511

[P] A man walking away in the distance along a huge wall constructed of large blocks.

[H] A man is walking

[LABEL] **entailment** [PRED] **entailment** [COEFF] 28.3717

[P] A man walking down a narrow street.

[H] A man is walking

[LABEL] **entailment** [PRED] **entailment** [COEFF] 28.1954

[P] The man is walking outside near a rocky river.

[H] The man is walking

[LABEL] **neutral** [PRED] **entailment** [COEFF] 28.0040

[P] Three women in black dresses walking down the street

[H] Three women are walking

[LABEL] **neutral** [PRED] **entailment** [COEFF] 27.3513

[P] A man with a jacket is walking through a wood workshop where there are tools and lumber.

[H] A man is walking

[LABEL] **entailment** [PRED] **entailment** [COEFF] 26.8422

[P] Women walk down a busy sidewalk.

[H] Women are walking

[LABEL] **entailment** [PRED] **entailment** [COEFF] 26.2349

[P] A man walks past a bed bath and beyond listening to his ipod or iphone wearing a leather jacket and blue sunglasses.

[H] A man is walking

[LABEL] **entailment** [PRED] **entailment** [COEFF] 25.9289

[P] Two construction workers in orange safety vests and tan khaki shorts, walking past orange road cones and a large city truck.

[H] Two workers are walking.

[LABEL] **entailment** [PRED] **entailment** [COEFF] 24.8895

[P] Two men walking down the street.

[H] Two men are walking

[LABEL] **entailment** [PRED] **entailment** [COEFF] 23.5370

[P] A group of people walking down the street.

[H] The people are walking.

## 1.255 Component 254

[LABEL] entailment [PRED] entailment [COEFF] 10.2076

[P] An asian man looks at fruit for sale at an outdoor market.

[H] A man is shopping for fruit.

[LABEL] entailment [PRED] entailment [COEFF] 9.6563

[P] Two young women are jogging on the beach.

[H] Two women are on the beach

[LABEL] entailment [PRED] entailment [COEFF] 9.4291

[P] A teenager has climbed a tree.

[H] There is a teenager in a tree.

[LABEL] contradiction [PRED] entailment [COEFF] 9.1591

[P] Construction workers take a break outside of a building.

[H] Construction workers work outside of a building.

[LABEL] entailment [PRED] entailment [COEFF] 8.6005

[P] A man inspecting things with a magnifying glass.

[H] A man using a magnifying glass.

[LABEL] entailment [PRED] entailment [COEFF] 8.5159

[P] Two female musicians are on outdoor stage at night.

[H] Two women are on stage.

[LABEL] entailment [PRED] entailment [COEFF] 8.2931

[P] A little boy playing on the monkey bars.

[H] A boy is playing on the bars.

[LABEL] entailment [PRED] entailment [COEFF] 8.0075

[P] A boy is attempting to climb an iron fence.

[H] A boy is climbing a fence

[LABEL] entailment [PRED] entailment [COEFF] 7.9362

[P] A healthcare worker giving a young baby a bath.

[H] A worker is giving a baby a bath.

[LABEL] entailment [PRED] entailment [COEFF] 7.6872

[P] A man is admiring art in a museum.

[H] The man is in a museum.

[LABEL] entailment [PRED] entailment [COEFF] 7.6547

[P] Men and women of various ages sit playing instruments in an orchestra while a similar group stand in the background as a choir.

[H] There is a group of people in an orchestra.

[LABEL] entailment [PRED] entailment [COEFF] 7.3613

[P] Two people walk separately on a brick surface.

[H] Two people are walking.

[LABEL] **entailment** [PRED] **entailment** [COEFF] 7.3285

[P] A woman in a green dress holding a toy dinosaur.

[H] A woman is holding a toy.

[LABEL] **entailment** [PRED] **entailment** [COEFF] 7.3027

[P] Several young people are standing around drinking beverages at some kind of outdoors gathering with food.

[H] People are gathered outdoors.

[LABEL] **contradiction** [PRED] **entailment** [COEFF] 7.2865

[P] A black child posing for a photo.

[H] A black child takes a photo

[LABEL] **entailment** [PRED] **entailment** [COEFF] 7.2784

[P] Two girls going down a water slide.

[H] Two girls sliding.

## 1.256 Component 255

[LABEL] **entailment** [PRED] **entailment** [COEFF] 19.5218

[P] A man with a white hat is sitting at a table listening to a man sing and play the guitar.

[H] A man is touching the guitar.

[LABEL] **entailment** [PRED] **entailment** [COEFF] 19.3724

[P] Someone is riding a motorcycle down a racetrack during daylight hours.

[H] A person is riding a vehicle.

[LABEL] **entailment** [PRED] **entailment** [COEFF] 16.6776

[P] A man hammers plywood on a roof.

[H] A man with a tool is on a roof.

[LABEL] **entailment** [PRED] **entailment** [COEFF] 15.8205

[P] A woman prepares to throw a stick to a leaping dog.

[H] A woman is with a dog.

[LABEL] **entailment** [PRED] **entailment** [COEFF] 15.6660

[P] A man holds his snowboard in the sand.

[H] A man is holding an object.

[LABEL] **entailment** [PRED] **entailment** [COEFF] 15.4898

[P] A brown dog is jumping after a tennis ball.

[H] A dog is playing with a ball.

[LABEL] **entailment** [PRED] **entailment** [COEFF] 15.0193  
[P] A teenage boy on a bicycle is jumping off a ramp.  
[H] A cyclist is riding.

[LABEL] **entailment** [PRED] **entailment** [COEFF] 14.3226  
[P] A young girl serving biscuits to an elderly man.  
[H] There is a young girl serving food.

[LABEL] **entailment** [PRED] **entailment** [COEFF] 14.0203  
[P] A woman in a white shirt tries on a hat in front of a mirror.  
[H] The woman is trying on clothes.

[LABEL] **entailment** [PRED] **entailment** [COEFF] 13.8269  
[P] A man wearing a black baseball cap turned backwards is in front of an advertisement for smoked herring.  
[H] A man wearing a hat.

[LABEL] **entailment** [PRED] **entailment** [COEFF] 13.8234  
[P] A tennis player in orange is striking the ball with her racquet.  
[H] A tennis player is hitting the ball.

[LABEL] **entailment** [PRED] **entailment** [COEFF] 13.6941  
[P] A surfer is doing a turn on his board.  
[H] A board is being used

[LABEL] **entailment** [PRED] **entailment** [COEFF] 13.3342  
[P] A man hammering a nail into a beam.  
[H] A person is using a tool.

[LABEL] **contradiction** [PRED] **entailment** [COEFF] 13.2549  
[P] Women riding a moped and a motorized bike.  
[H] Women are riding bicycles.

[LABEL] **entailment** [PRED] **entailment** [COEFF] 13.1759  
[P] A butcher wearing glasses and a blue apron prepares strips of meat.  
[H] A person wearing clothing.

[LABEL] **entailment** [PRED] **entailment** [COEFF] 13.0839  
[P] A dog leaps high to catch a ball.  
[H] A dog playing catch.

## 1.257 Component 256

[LABEL] **contradiction** [PRED] **contradiction** [COEFF] 25.9654  
[P] A black and white dog jumping high to catch a ball.  
[H] A yellow dog is playing with its master.

[LABEL] **contradiction** [PRED] **contradiction** [COEFF] 25.7608  
[P] The black dog leaps off the dock and into the water.  
[H] The white dog leaped into the water.

[LABEL] **contradiction** [PRED] **contradiction** [COEFF] 25.4714  
[P] A white dog is running on wet rocks.  
[H] A blue dog is asleep.

[LABEL] **contradiction** [PRED] **contradiction** [COEFF] 25.0340  
[P] White dog with orange collar walks in the field.  
[H] A black dog walks in the field

[LABEL] **contradiction** [PRED] **contradiction** [COEFF] 24.8368  
[P] A black dog is standing outside in the dark of night.  
[H] A white dog is standing outside in the dark of night.

[LABEL] **neutral** [PRED] **contradiction** [COEFF] 24.1867  
[P] The white dog has a ball in its mouth.  
[H] A dog has a red ball in its mouth.

[LABEL] **contradiction** [PRED] **contradiction** [COEFF] 23.8321  
[P] A large, black dog is practicing attacking a culprit on a uniformed man.  
[H] A small brown dog is practicing catch with his owner.

[LABEL] **contradiction** [PRED] **contradiction** [COEFF] 22.7957  
[P] A black dog jumps into the water off a dock.  
[H] The brown dog swims.

[LABEL] **neutral** [PRED] **contradiction** [COEFF] 22.2272  
[P] A black dog running on the beach near the shore.  
[H] A white dog is running.

[LABEL] **contradiction** [PRED] **contradiction** [COEFF] 22.0152  
[P] A woman in a white coat is standing next to a car.  
[H] A young woman in a black coat is in class.

[LABEL] **contradiction** [PRED] **contradiction** [COEFF] 21.7577  
[P] The woman is guiding a brown and white dog over a tall white fence on an obstacle course.  
[H] The woman is guiding a blue and red dog.

[LABEL] **contradiction** [PRED] **contradiction** [COEFF] 21.6631  
[P] Four girls in pink and white all in the same pose.  
[H] Four girls in red and green are doing different poses.

[LABEL] **contradiction** [PRED] **contradiction** [COEFF] 21.6084  
[P] A person in a blue hat is watching a worker.  
[H] A person in a red hat is watching a worker.

[LABEL] contradiction [PRED] contradiction [COEFF] 20.8804

[P] The boy in the red jersey runs with the football.

[H] The boy in the blue jersey runs with the football.

[LABEL] contradiction [PRED] contradiction [COEFF] 20.7091

[P] The girl with the pink workout gear is doing a flip.

[H] The girl has green workout gear.

[LABEL] contradiction [PRED] contradiction [COEFF] 20.4676

[P] An african woman in a black shirt and purple dress looks at an african man in a blue shirt and green pants.

[H] The asian woman wore orange and green.

## 1.258 Component 257

[LABEL] contradiction [PRED] contradiction [COEFF] 20.1006

[P] A couple of people sit outdoors at a table with an umbrella and talk.

[H] The people are playing soccer outside.

[LABEL] contradiction [PRED] contradiction [COEFF] 18.8934

[P] Two females sitting at a table eating food.

[H] The females are playing basketball.

[LABEL] contradiction [PRED] contradiction [COEFF] 18.2850

[P] A couple of friends hanging out in a park, relaxing and taking pictures.

[H] A group of friends are playing football.

[LABEL] contradiction [PRED] contradiction [COEFF] 17.4572

[P] A group of women in colorful attire are washing clothes in a body of water.

[H] A group of women are playing soccer.

[LABEL] contradiction [PRED] contradiction [COEFF] 16.7898

[P] Black man with his back to us doing exercises outside.

[H] A man is playing basketball with his friends.

[LABEL] contradiction [PRED] contradiction [COEFF] 15.9903

[P] The picture shows several people eating at outdoor tables.

[H] They are playing basketball.

[LABEL] contradiction [PRED] contradiction [COEFF] 14.5747

[P] Four young children sit on the ground outside, some on a blanket, some in the dirt, two have their eyes closed and one is only partially visible on the left side of the picture.

[H] Four children are playing baseball in the park.

[LABEL] contradiction [PRED] contradiction [COEFF] 14.0717

[P] Two toddler boys sharing a baby swing at dusk.

[H] Two boys are playing basketball.

[LABEL] **contradiction** [PRED] **contradiction** [COEFF] 14.0480

[P] Two people are standing and waiting for someone to come out of the red phone booth in the city.

[H] People playing baseball

[LABEL] **contradiction** [PRED] **contradiction** [COEFF] 13.8407

[P] A child is looking at a woman while another child sits in a stroller.

[H] Two children are playing soccer

[LABEL] **contradiction** [PRED] **contradiction** [COEFF] 13.5564

[P] Three elderly persons are sitting in chairs staring out the window.

[H] Older people are playing bingo

[LABEL] **contradiction** [PRED] **contradiction** [COEFF] 13.2898

[P] Three men are talking in front of old stairs on the street.

[H] Three men playing football.

[LABEL] **contradiction** [PRED] **contradiction** [COEFF] 12.9662

[P] A family doing a picnic in the park.

[H] A family is playing a soccer game.

[LABEL] **contradiction** [PRED] **contradiction** [COEFF] 12.9451

[P] The worker in the fluorescent vest is taking a break and sitting down.

[H] The group plays pool

[LABEL] **contradiction** [PRED] **contradiction** [COEFF] 12.9203

[P] Two men and a woman in white aprons prepare a plate of food in a kitchen.

[H] The group is playing flag football outdoors.

[LABEL] **contradiction** [PRED] **contradiction** [COEFF] 12.8923

[P] A woman wearing a pink sweater and eyeglasses is wiping a wooden table with a pink sponge.

[H] The woman is playing water polo in a pool.

## 1.259 Component 258

[LABEL] **neutral** [PRED] **entailment** [COEFF] 39.4475

[P] A uniformed woman holding a camera standing in front of a crowd of spectators.

[H] The crowd is looking at a woman with a camera.

[LABEL] **neutral** [PRED] **entailment** [COEFF] 37.2237

[P] Cars are parked in a city parking lot and people are walking around.

[H] People are looking at the car parked on the street.

[LABEL] **neutral** [PRED] **entailment** [COEFF] 32.9896

[P] A child wearing a coat is standing on a white tile floor holding a toy in a toy store.

[H] A child is looking at the toy.

[LABEL] **entailment** [PRED] **entailment** [COEFF] 31.6355

[P] A group of three boy scouts rest on a bluff overlooking the ocean.

[H] There are boys looking at the ocean.

[LABEL] **entailment** [PRED] **entailment** [COEFF] 31.0412

[P] A man standing in the street enjoying the architecture of a building.

[H] A man is gazing at a building.

[LABEL] **entailment** [PRED] **entailment** [COEFF] 30.7388

[P] Three people are putting candles on a cake.

[H] The people are looking at a cake.

[LABEL] **entailment** [PRED] **entailment** [COEFF] 30.6249

[P] A man is standing on top of a tall building that overlooks the city.

[H] A man is looking at the city.

[LABEL] **entailment** [PRED] **entailment** [COEFF] 30.5759

[P] The infant has plenty of toys, but attention is drawn to the nearby cat.

[H] The infant is looking at a cat.

[LABEL] **neutral** [PRED] **entailment** [COEFF] 30.2950

[P] Man in black shirt wringing his mop as he cleans an amusement park ride.

[H] A man is looking at a park ride.

[LABEL] **neutral** [PRED] **entailment** [COEFF] 26.4188

[P] A boy blows out a candle on a cake with a penguin labeled " happy birthday, quinn. "

[H] A boy is looking at his birthday cake.

[LABEL] **entailment** [PRED] **entailment** [COEFF] 26.3387

[P] A young boy with a red backpack and blue shirt is overlooking the scenery of a historic landmark.

[H] A young boy looks at a landmark

[LABEL] **entailment** [PRED] **entailment** [COEFF] 26.2555

[P] A man is holding two hats, one in his hand and one hanging from his elbow, in front of a crowd.

[H] A crowd is watching a man with hats

[LABEL] **entailment** [PRED] **entailment** [COEFF] 25.7674

[P] A family gathered at a painted van

[H] A family looking at a van.

[LABEL] **neutral** [PRED] **entailment** [COEFF] 23.6289

[P] A shirtless, bearded and mustached man peers through a home's doorway while a cat sits on the bottom step of the entrance to the home.

[H] The man is looking at the cat.



[LABEL] **neutral** [PRED] **entailment** [COEFF] 23.4168

[P] Two people have their heads down on a table while a man in a brown jacket looks out the window at a group of bikes and motorcycles.

[H] The man is watching their bikes.

[LABEL] **entailment** [PRED] **entailment** [COEFF] 22.5906

[P] A young boy and 2 women look out a window to construction workers.

[H] The trio of people watch the construction workers from a window.

## 1.260 Component 259

[LABEL] **entailment** [PRED] **entailment** [COEFF] 10.8450

[P] A girl in a blue shirt and yellow shorts is jumping in the air and yelling into a microphone on a stage.

[H] A person jumping on stage.

[LABEL] **entailment** [PRED] **entailment** [COEFF] 10.4287

[P] Two young children are walking hand in hand on an outdoor path.

[H] Two children walking on a path.

[LABEL] **entailment** [PRED] **entailment** [COEFF] 10.4128

[P] A woman is waving to the crowd as she rides a roller coaster.

[H] A woman doing a roller coaster ride.

[LABEL] **entailment** [PRED] **entailment** [COEFF] 10.3528

[P] Two motorists are riding along on their vehicle that is oddly designed and colored.

[H] Two people in a vehicle.

[LABEL] **entailment** [PRED] **entailment** [COEFF] 10.1959

[P] A child is holding a red umbrella in the dirt.

[H] A child with an umbrella.

[LABEL] **entailment** [PRED] **entailment** [COEFF] 10.1924

[P] Two children are playing a game at the fair

[H] Two children at a fair playing.

[LABEL] **entailment** [PRED] **entailment** [COEFF] 10.1071

[P] A black woman standing in front of a bunch of clothing.

[H] A woman in front of clothing.

[LABEL] **entailment** [PRED] **entailment** [COEFF] 10.1023

[P] A young girl slides down a green plastic slide on a playground.

[H] A girl sliding on a playground.

[LABEL] **entailment** [PRED] **entailment** [COEFF] 9.9047

[P] Two men are giving shoeshines in an outdoor setting.

[H] Two people shoeshining.

[LABEL] entailment [PRED] entailment [COEFF] 9.8814  
 [P] A man in a white shirt and basketball shorts is running on a treadmill.  
 [H] A person running on a treadmill.

[LABEL] entailment [PRED] entailment [COEFF] 9.6532  
 [P] The boy in the red hat and jacket is carrying a huge lump of snow.  
 [H] A boy carrying snow.

[LABEL] entailment [PRED] entailment [COEFF] 9.5188  
 [P] An orange dragster race car sits on the track.  
 [H] A car on a track.

[LABEL] entailment [PRED] entailment [COEFF] 9.3869  
 [P] A woman scantily dressed in a tribal green and blue costume dances in a parade while onlookers watch.  
 [H] A woman in a parade.

[LABEL] entailment [PRED] entailment [COEFF] 9.3443  
 [P] A young man leaps through the air from a rocky mountaintop.  
 [H] A person jumping.

[LABEL] entailment [PRED] entailment [COEFF] 9.3193  
 [P] Two people canoe down a river at the time of a beautiful sunset.  
 [H] Two people traveling by river.

[LABEL] entailment [PRED] entailment [COEFF] 9.3166  
 [P] A little boy is in a swimming pool with goggles on, covering his mouth and nose with his hands just above the surface of the water.  
 [H] A child in a swimming pool.

## 1.261 Component 260

[LABEL] entailment [PRED] entailment [COEFF] 27.6949  
 [P] A man and woman sit in a restaurant holding books, the woman reading hers and the man looking at the woman.  
 [H] Two people are sitting at a restaurant reading books.

[LABEL] entailment [PRED] entailment [COEFF] 27.0478  
 [P] An man in a blue shirt and a boy in a white shirt are riding bikes down the sidewalk of a tree - line street on a sunny day.  
 [H] Two people are riding bicycles on a sidewalk.

[LABEL] entailment [PRED] entailment [COEFF] 26.7495  
 [P] A man and a woman are standing on grass and holding hands.  
 [H] Two people are holding hands.

[LABEL] entailment [PRED] entailment [COEFF] 24.4922

[P] A man and a woman are riding a large motorcycle.

[H] Two people are riding a motorcycle.

[LABEL] **entailment** [PRED] **entailment** [COEFF] 22.6820

[P] A happy women and a young adult getting their picture taken.

[H] Two people get their picture taken.

[LABEL] **entailment** [PRED] **entailment** [COEFF] 22.1147

[P] A young boy and a young girl ride a bicycle down a street, with dirt and small trees around them.

[H] Two young children are riding a bicycle.

[LABEL] **entailment** [PRED] **entailment** [COEFF] 22.0684

[P] A brown dog and a black and white dog stand beside a hole in the dirt.

[H] Two dogs stand beside a hole in the dirt.

[LABEL] **entailment** [PRED] **entailment** [COEFF] 21.9454

[P] A man and a woman sit at a bar outside, each holding a full glass of beer.

[H] Two people sit outside holding a beer.

[LABEL] **entailment** [PRED] **entailment** [COEFF] 21.3278

[P] A man and a young girl in a pink bathing suit float together on an inflatable tube in the water.

[H] Two people are on an inflatable tube.

[LABEL] **entailment** [PRED] **entailment** [COEFF] 20.9968

[P] A man and a woman are dancing with their hair up.

[H] Two people are dancing.

[LABEL] **entailment** [PRED] **entailment** [COEFF] 20.7276

[P] A woman and a man watching another man work with clay.

[H] Two people watch another one work.

[LABEL] **entailment** [PRED] **entailment** [COEFF] 20.4638

[P] A woman and a man are playing the guitar while another man is singing.

[H] Two people play guitar with someone else singing.

[LABEL] **neutral** [PRED] **entailment** [COEFF] 20.1572

[P] A man and a woman sitting at a table.

[H] A couple are sitting at their table.

[LABEL] **entailment** [PRED] **entailment** [COEFF] 19.4306

[P] A man and a woman are sitting outside with large building surrounding them.

[H] Two people are sitting outside by a large building.

[LABEL] **entailment** [PRED] **entailment** [COEFF] 18.6488

[P] A man and a woman are standing in a forest.

[H] Two people are standing.

[LABEL] **entailment** [PRED] **entailment** [COEFF] 17.9267  
[P] Woman and older man are walking side - by - side on treadmills in a fitness room.  
[H] Two people are walking on treadmills.

## 1.262 Component 261

[LABEL] **entailment** [PRED] **entailment** [COEFF] 18.6604  
[P] A man who is doing a skateboard grind with black converse shoes and jeans with a blue shirt.  
[H] A man is doing skateboard tricks.

[LABEL] **entailment** [PRED] **entailment** [COEFF] 17.4816  
[P] A man wearing yellow riding a bike.  
[H] A man steering a bike.

[LABEL] **entailment** [PRED] **entailment** [COEFF] 16.3074  
[P] A young baby girl is eating an apple in the grass.  
[H] A baby is in the grass munching an apple.

[LABEL] **neutral** [PRED] **entailment** [COEFF] 15.9178  
[P] A kid jumping into a pool of water.  
[H] A boy dives into a pool.

[LABEL] **contradiction** [PRED] **entailment** [COEFF] 15.7509  
[P] An african woman is standing near a well filling a jug near a hut with a thatched roof.  
[H] A woman fetching water from a well beside an african hut with a straw roof.

[LABEL] **entailment** [PRED] **entailment** [COEFF] 15.7121  
[P] A woman of middle eastern descent is using a loom.  
[H] A middle eastern woman is weaving on a loom.

[LABEL] **neutral** [PRED] **entailment** [COEFF] 14.4789  
[P] Two small children are watching a red train pass by.  
[H] There are children watching the train tracks.

[LABEL] **entailment** [PRED] **entailment** [COEFF] 14.4001  
[P] One of the tennis players is picking something out of his racket.  
[H] A tennis player is cleaning his racket.

[LABEL] **entailment** [PRED] **entailment** [COEFF] 14.3610  
[P] A group of women are playing their instruments in black dresses.  
[H] A group of ladies are playing music.

[LABEL] **entailment** [PRED] **entailment** [COEFF] 14.2967  
[P] A lady gets a new hairdo.  
[H] A lady gets a new hairstyle.

[LABEL] **entailment** [PRED] **entailment** [COEFF] 14.2214

[P] A man steers a blue boat past brightly colored houses.

[H] A man steers a boat past some houses.

[LABEL] **contradiction** [PRED] **entailment** [COEFF] 14.0895

[P] A man wearing a get a job t - shirt takes a picture of the camera holder with a bright yellow camera while also holding a photo in his left hand.

[H] A man draws a picture of his camera holder

[LABEL] **entailment** [PRED] **entailment** [COEFF] 14.0856

[P] A group of women on a green bus, one has noticed the camera and attempts to imitate it by making a rectangle with her index finger and her thumb.

[H] A woman imitates a camera with her hand.

[LABEL] **entailment** [PRED] **entailment** [COEFF] 13.9036

[P] A group of workers working on a train track.

[H] People fixing the train tracks.

[LABEL] **entailment** [PRED] **entailment** [COEFF] 13.8477

[P] A troupe of acrobats in white pose on wires.

[H] A bunch of acrobats are standing on some wires.

[LABEL] **entailment** [PRED] **entailment** [COEFF] 13.8471

[P] A young man wearing jeans balances on a train track.

[H] A man walks on a train track.

## 1.263 Component 262

[LABEL] **neutral** [PRED] **entailment** [COEFF] 6.4159

[P] A man is doing a jump on a wakeboard in the water.

[H] A man is in the ocean.

[LABEL] **entailment** [PRED] **entailment** [COEFF] 6.1582

[P] A teen boy doing a bicycle trick on a bike ramp

[H] A boy riding his bike.

[LABEL] **entailment** [PRED] **entailment** [COEFF] 6.0300

[P] A man in a wetsuit gliding through the ocean with one sail.

[H] A man on the ocean on a boat.

[LABEL] **entailment** [PRED] **entailment** [COEFF] 5.8124

[P] A boy looks at a new toy during christmas

[H] A child looks at his new christmas present.

[LABEL] **contradiction** [PRED] **entailment** [COEFF] 5.6374

[P] A solo kayaker, who is wearing a light blue shirt and black helmet, fights against the rapids.

[H] A team of kayakers fight the rapids.

[LABEL] entailment [PRED] entailment [COEFF] 5.6300

[P] A child in a black wetsuit is in the waves on a surfboard.

[H] A child in water.

[LABEL] entailment [PRED] entailment [COEFF] 5.6195

[P] A woman with a cane is standing, bundled up in winter weather.

[H] A woman is wearing winter clothes.

[LABEL] entailment [PRED] entailment [COEFF] 5.6152

[P] Two seagulls on water, foreground bird has object held in beak.

[H] Two seagulls are floating in water.

[LABEL] entailment [PRED] entailment [COEFF] 5.5734

[P] A child is on a slide.

[H] A child is playing.

[LABEL] entailment [PRED] entailment [COEFF] 5.4834

[P] Men on horses wrangling a bull.

[H] The men are riding horses.

[LABEL] entailment [PRED] entailment [COEFF] 5.2553

[P] Brunette uses her blue bowling ball to bowl at a bowling alley.

[H] A person bowls at an alley.

[LABEL] entailment [PRED] entailment [COEFF] 5.1842

[P] A person in a wetsuit is in midair while surfing.

[H] A person is in the water.

[LABEL] neutral [PRED] entailment [COEFF] 5.1675

[P] An athlete wearing a black and gold nfl jersey carries multiple copies of the same video game.

[H] Someone is carrying copies of a sports game.

[LABEL] entailment [PRED] entailment [COEFF] 5.1428

[P] A female kicking a soccer ball while in front of a soccer goal.

[H] The woman is playing soccer.

[LABEL] entailment [PRED] entailment [COEFF] 5.0519

[P] A black dog is retrieving a ball in water.

[H] A black dog is swimming.

[LABEL] entailment [PRED] entailment [COEFF] 5.0350

[P] A child performing a cartwheel in a yard.

[H] A kid is moving.

## 1.264 Component 263

[LABEL] **contradiction** [PRED] **contradiction** [COEFF] 42.0661

[P] Three dogs on a sidewalk.

[H] Three cats are sitting on the sidewalk

[LABEL] **contradiction** [PRED] **contradiction** [COEFF] 41.0208

[P] Two dogs are running along a grassy path.

[H] Two cats are jumping.

[LABEL] **contradiction** [PRED] **contradiction** [COEFF] 38.7453

[P] Two dogs running and playing rough in the grass.

[H] Two cats are playing rough with each other outside on the grass.

[LABEL] **contradiction** [PRED] **contradiction** [COEFF] 38.2811

[P] Two dogs are running in a field.

[H] Two cats are jumping.

[LABEL] **contradiction** [PRED] **contradiction** [COEFF] 36.5385

[P] Four black dogs run across the grass.

[H] The cats are running through the grass.

[LABEL] **contradiction** [PRED] **contradiction** [COEFF] 34.2373

[P] Two dogs fight over a bone.

[H] Two cats are chasing each other.

[LABEL] **contradiction** [PRED] **contradiction** [COEFF] 34.1473

[P] Two dogs run and play together on a narrow dirt path in the middle of a field.

[H] Two cats are walking through a field.

[LABEL] **contradiction** [PRED] **contradiction** [COEFF] 30.9063

[P] Two dogs with multiple colors are running through the grass.

[H] The cats are playing with yarn.

[LABEL] **contradiction** [PRED] **contradiction** [COEFF] 30.0644

[P] Two dogs play in a field.

[H] Three cats are playing.

[LABEL] **contradiction** [PRED] **contradiction** [COEFF] 28.6662

[P] Dogs chase each other.

[H] Cats chase each other

[LABEL] **contradiction** [PRED] **contradiction** [COEFF] 26.3035

[P] A person standing behind two dogs interacting with one another.

[H] A person standing behind three cats interacting with one another.

[LABEL] **contradiction** [PRED] **contradiction** [COEFF] 26.1352

[P] Two dogs, a big dog and a small dog, run in the snow.

[H] Two cats rolling in the snow.

[LABEL] **contradiction** [PRED] **contradiction** [COEFF] 25.0298

[P] Two dogs wearing sweaters play in the grass.

[H] Two cats are on a chair.

[LABEL] **contradiction** [PRED] **contradiction** [COEFF] 22.1288

[P] Four humans and four dogs lounging in the dining area.

[H] Four humans and four cats lounging in the living room.

[LABEL] **contradiction** [PRED] **contradiction** [COEFF] 21.9291

[P] Two dogs paying attention to each other.

[H] Cats are napping.

[LABEL] **contradiction** [PRED] **contradiction** [COEFF] 20.0573

[P] Many dogs are running the same way in a field.

[H] Cats are chasing birds

## 1.265 Component 264

[LABEL] **contradiction** [PRED] **contradiction** [COEFF] 16.1861

[P] A girl with hot pink toenails and bathing suit is laying on a hot pink towel.

[H] A boy with hot pink toenails and bathing suit is laying on a hot pink towel.

[LABEL] **contradiction** [PRED] **contradiction** [COEFF] 13.9151

[P] A little girl frozen as a praying mantis sits on her arm.

[H] A little boy frozen as a praying mantis sits on his arm.

[LABEL] **contradiction** [PRED] **contradiction** [COEFF] 12.3307

[P] A girl with a blue bookbag is sleeping.

[H] The boy with a blue bookbag is sleeping.

[LABEL] **contradiction** [PRED] **contradiction** [COEFF] 11.9588

[P] A young woman is selling vegetables by the roadside.

[H] The boy sells vegetables roadside.

[LABEL] **contradiction** [PRED] **contradiction** [COEFF] 11.3821

[P] A little girl is playing with some leaves outside during autumn.

[H] A boy is playing outside.

[LABEL] **contradiction** [PRED] **contradiction** [COEFF] 11.3257

[P] Two young girls eating corn on the cob on a sidewalk without shoes.

[H] Two young boys eating corn on the cob on a sidewalk without shoes.

[LABEL] **contradiction** [PRED] **contradiction** [COEFF] 11.2953



[P] A small girl with brown hair and a big smile is jumping rope.

[H] The boy smiled while jumping rope.

[LABEL] **contradiction** [PRED] **contradiction** [COEFF] 9.5022

[P] A group of young girls smiling with a large crowd behind them

[H] There is a group of young boys smiling.

[LABEL] **contradiction** [PRED] **contradiction** [COEFF] 8.8475

[P] Two girls clean the glass windows of an entryway while another woman speaks to them.

[H] Two boys cleaning glass while a woman speaks to them.

[LABEL] **contradiction** [PRED] **contradiction** [COEFF] 7.9743

[P] A young girl in a blue shirt is writing with a pencil in a notebook.

[H] A young boy is drawing in his sketchbook.

[LABEL] **contradiction** [PRED] **contradiction** [COEFF] 7.9623

[P] Two girls share a laugh together.

[H] Two boys share a laugh together.

[LABEL] **contradiction** [PRED] **contradiction** [COEFF] 7.9110

[P] A young oriental girl is standing above the crowd playing with a pinwheel

[H] The young boy is hovering over the crowd on a magic carpet.

[LABEL] **contradiction** [PRED] **contradiction** [COEFF] 7.5148

[P] A little girl is standing inside a circular contraption with bubbles on it.

[H] A little boy plays with bubbles

[LABEL] **contradiction** [PRED] **contradiction** [COEFF] 7.1120

[P] Three girls help lay a roof on a newly constructed building.

[H] Three boys help lay a roof on a newly constructed building.

[LABEL] **contradiction** [PRED] **contradiction** [COEFF] 6.6095

[P] The little girl in her bathing suit stands near the sprinklers and squeals.

[H] A little boy stands near the sprinklers and squeals.

[LABEL] **contradiction** [PRED] **contradiction** [COEFF] 6.5180

[P] A girl in a swimming pool holding on to the side.

[H] A boy is diving in the the ocean waves.

## 1.266 Component 265

[LABEL] **contradiction** [PRED] **contradiction** [COEFF] 9.8276

[P] A man in a military - type uniform is standing in the street listening to another man who has a piece of paper in his hands.

[H] The man is inside a movie theater.

[LABEL] contradiction [PRED] contradiction [COEFF] 9.7020  
[P] A man in a nice apartment, sitting while putting his right shoe on next to his standing friend.  
[H] The men are fighting in their trailer.

[LABEL] contradiction [PRED] contradiction [COEFF] 9.0800  
[P] Two men in white lab coats look at a computer screen.  
[H] The men are playing basketball.

[LABEL] contradiction [PRED] contradiction [COEFF] 8.8799  
[P] Three men dressed in black outside camping and hiking.  
[H] The men are watching a car race.

[LABEL] contradiction [PRED] contradiction [COEFF] 8.5416  
[P] A young girl wearing a pink flower print shirt and blue jeans examines an object in her hands while sitting on the grass.  
[H] The young girl is ice skating on a frozen pond.

[LABEL] contradiction [PRED] contradiction [COEFF] 8.2994  
[P] A man in white spins through the air during a martial arts competition, as spectators look on.  
[H] The man is swimming at the beach.

[LABEL] contradiction [PRED] contradiction [COEFF] 8.0425  
[P] A man is painting beside a small body of water.  
[H] The man is at a ice hockey game

[LABEL] contradiction [PRED] contradiction [COEFF] 8.0032  
[P] Two women in a light blue and a dark blue jacket walking in a crosswalk and a fake giant rat is on the sidewalk behind them.  
[H] The women are hang gliding over a cavern.

[LABEL] contradiction [PRED] contradiction [COEFF] 7.9560  
[P] A man with a large hat in the bushes.  
[H] The man is driving a locomotive over a bridge.

[LABEL] contradiction [PRED] contradiction [COEFF] 7.9029  
[P] A man is walking in front of a building with an arrow pointing in the opposite direction.  
[H] The man is flying an airplane.

[LABEL] contradiction [PRED] contradiction [COEFF] 7.7184  
[P] A woman in a yellow bikini top and sunglasses in a crowd of people on a boardwalk.  
[H] The woman is skiing down a slope.

[LABEL] contradiction [PRED] contradiction [COEFF] 7.5846  
[P] A man in snowshoes stands in front of a river.  
[H] The man is at a deli getting lunch.

[LABEL] contradiction [PRED] contradiction [COEFF] 7.4691

[P] A woman with a bright blue satchel measures the blood pressure of an old woman sitting in a chair.  
[H] Both women are horseback riding in the mountains.

[LABEL] **contradiction** [PRED] **contradiction** [COEFF] 7.4047

[P] A man with a pitchfork stands near a bucket of branches across from an apartment complex.  
[H] The man is inside eating a burrito in his country home.

[LABEL] **contradiction** [PRED] **contradiction** [COEFF] 7.2896

[P] Four people, two of whom can be seen wearing conference badges, are grouped around a long table with several laptops on it.  
[H] The people are standing in line at the water slide.

[LABEL] **contradiction** [PRED] **contradiction** [COEFF] 7.2641

[P] Several men in red reflective vests, helmets, and face masks work in an area under construction.  
[H] The men are asleep in the motel

## 1.267 Component 266

[LABEL] **contradiction** [PRED] **contradiction** [COEFF] 5.3638

[P] A group of women holding black umbrellas.  
[H] The man wraps his scarf tightly around his neck.

[LABEL] **contradiction** [PRED] **contradiction** [COEFF] 4.5796

[P] A man with a jackhammer demolishing cement  
[H] A man is riding a tractor.

[LABEL] **entailment** [PRED] **contradiction** [COEFF] 4.5340

[P] A little girl is kicking a soccer ball.  
[H] A young boy runs

[LABEL] **contradiction** [PRED] **contradiction** [COEFF] 4.4054

[P] Several people on horseback carrying flags.  
[H] The people are walking on foot.

[LABEL] **contradiction** [PRED] **contradiction** [COEFF] 4.2687

[P] A young girl is eating cake.  
[H] Boy plays soccer

[LABEL] **contradiction** [PRED] **contradiction** [COEFF] 4.2311

[P] A boy makes a jumping dive toward another boy with a soccer ball near.  
[H] The boys are inside sitting down.

[LABEL] **contradiction** [PRED] **contradiction** [COEFF] 4.1798

[P] Little girl in a green jersey playing soccer by herself.  
[H] Little girl is sitting at home watching television.

[LABEL] **contradiction** [PRED] **contradiction** [COEFF] 4.1356

[P] A young female basketball player in red and white blocks another in possession of the ball who is dressed in white and maroon.

[H] The men are playing golf.

[LABEL] **contradiction** [PRED] **contradiction** [COEFF] 4.1064

[P] The sky is blue and clear.

[H] The sky looks very stormy.

[LABEL] **contradiction** [PRED] **contradiction** [COEFF] 4.0866

[P] Two women carrying a bag walking on sidewalk near a lake

[H] There is a man riding a bicycle.

[LABEL] **contradiction** [PRED] **contradiction** [COEFF] 4.0302

[P] An oriental woman looks at a small display of cosmetics on a table.

[H] A white man sells watches.

[LABEL] **contradiction** [PRED] **contradiction** [COEFF] 4.0199

[P] Two men, each playing a guitar.

[H] Men are eating dinner.

[LABEL] **contradiction** [PRED] **contradiction** [COEFF] 4.0192

[P] Man jumping off rocks.

[H] A man is sitting.

[LABEL] **contradiction** [PRED] **contradiction** [COEFF] 4.0168

[P] Runners in a race passing a lighthouse.

[H] People are running by the grocery store.

[LABEL] **contradiction** [PRED] **contradiction** [COEFF] 4.0134

[P] A man with headphones holds a microphone.

[H] A man is playing piano.

[LABEL] **contradiction** [PRED] **contradiction** [COEFF] 3.8812

[P] A woman with holding a young girl playing with bubbles at a picnic.

[H] The boys are riding their motorcycles.

## 1.268 Component 267

[LABEL] **entailment** [PRED] **contradiction** [COEFF] 7.5576

[P] Several people on a stage with a blue background.

[H] The humans are on the ground.

[LABEL] **contradiction** [PRED] **contradiction** [COEFF] 7.2333

[P] Construction workers working on the road.

[H] They are underwater.

[LABEL] contradiction [PRED] contradiction [COEFF] 6.7712

[P] A man holding a baby in water.

[H] A man is sleep.

[LABEL] contradiction [PRED] contradiction [COEFF] 5.8599

[P] A man on a scaffold paints a wall with a paint roller.

[H] The man is on the ground

[LABEL] contradiction [PRED] contradiction [COEFF] 5.6103

[P] A man playing baseball.

[H] A man is sleep.

[LABEL] contradiction [PRED] contradiction [COEFF] 5.5015

[P] A lady is singing a song on the mic.

[H] A lady is sleep.

[LABEL] neutral [PRED] contradiction [COEFF] 5.3442

[P] People are walking through a market, browsing over merchandise and making purchases.

[H] The people are indoors.

[LABEL] contradiction [PRED] contradiction [COEFF] 5.2590

[P] A cowboy riding a steer at a rodeo as others gaze on.

[H] A cowboy is sleep.

[LABEL] contradiction [PRED] contradiction [COEFF] 4.8001

[P] A group of soccer players on a field, one team wearing black and blue uniforms, the other, red and white.

[H] The players are on the bus.

[LABEL] contradiction [PRED] contradiction [COEFF] 4.3170

[P] A man wearing a white t - shirt and helmet sits on a bike, turning around to reach into his saddle bag.

[H] The man is sitting in a truck

[LABEL] contradiction [PRED] contradiction [COEFF] 4.2569

[P] A person is diving into clear blue water.

[H] The person is on a train.

[LABEL] contradiction [PRED] contradiction [COEFF] 4.2481

[P] Men are playing soccer on the grassy field with spectators in the background.

[H] The men are inside

[LABEL] contradiction [PRED] contradiction [COEFF] 3.9538

[P] People standing outside of an ice cream stand

[H] Everyone is home in bed.

[LABEL] **contradiction** [PRED] **contradiction** [COEFF] 3.9069  
[P] A construction worker siting on a green tractor.  
[H] The construction woker is in a car

[LABEL] **contradiction** [PRED] **contradiction** [COEFF] 3.9040  
[P] Three boys climb on a slide  
[H] Three boys play on a jungle gym.

[LABEL] **contradiction** [PRED] **contradiction** [COEFF] 3.8587  
[P] Person in the midst of a ramp jump.  
[H] The people are in the ocean.

## 1.269 Component 268

[LABEL] **entailment** [PRED] **entailment** [COEFF] 7.2674  
[P] A man is jumping it a meadow  
[H] A man is jumping a meadow.

[LABEL] **entailment** [PRED] **entailment** [COEFF] 7.2078  
[P] A man wears a backpack.  
[H] A man wears a backpack

[LABEL] **entailment** [PRED] **entailment** [COEFF] 7.0053  
[P] Picture of a guy at a gas station.  
[H] Picture of a guy at a gas station

[LABEL] **entailment** [PRED] **entailment** [COEFF] 6.9930  
[P] A man working on his roof.  
[H] A man works on his roof.

[LABEL] **entailment** [PRED] **entailment** [COEFF] 6.9467  
[P] People in the city.  
[H] People are in the city.

[LABEL] **entailment** [PRED] **entailment** [COEFF] 6.7582  
[P] A man becomes engulfed in his book.  
[H] A man is engulfed in his book.

[LABEL] **entailment** [PRED] **entailment** [COEFF] 6.4836  
[P] People moving by a corner in a town.  
[H] People moving by a corner in town.

[LABEL] **entailment** [PRED] **entailment** [COEFF] 6.2848  
[P] A train is underground.  
[H] A train is underground.

[LABEL] entailment [PRED] entailment [COEFF] 6.0866

[P] Couple being married in a church.

[H] The couple are in a church

[LABEL] entailment [PRED] entailment [COEFF] 6.0438

[P] Women in sari's look on as a woman is speaking.

[H] A woman speaks as women in saris look on.

[LABEL] entailment [PRED] entailment [COEFF] 5.9546

[P] A man preparing something to eat.

[H] A man is making something to eat.

[LABEL] entailment [PRED] entailment [COEFF] 5.8069

[P] A woman stands outside a store.

[H] Outside a store stands a woman.

[LABEL] entailment [PRED] entailment [COEFF] 5.7304

[P] A woman is pointing while others are taking pictures.

[H] A woman is pointing.

[LABEL] entailment [PRED] entailment [COEFF] 5.6406

[P] Two women in head wraps.

[H] Two women in head wraps.

[LABEL] entailment [PRED] entailment [COEFF] 5.5512

[P] A man leans on a wall in the city.

[H] The man is leaning against the wall in the city.

[LABEL] entailment [PRED] entailment [COEFF] 5.5305

[P] A dog stands in water.

[H] The dog stood in water.

## 1.270 Component 269

[LABEL] contradiction [PRED] contradiction [COEFF] 38.8485

[P] A man in a striped shirt smiling.

[H] The man is not wearing a shirt.

[LABEL] contradiction [PRED] contradiction [COEFF] 38.1438

[P] A man in a jacket jumping around a stick - pole on the beach.

[H] The man is not wearing a jacket.

[LABEL] contradiction [PRED] contradiction [COEFF] 33.0986

[P] A man walks on a ropes course in a helmet.

[H] The man is not wearing a helmet.

[LABEL] contradiction [PRED] contradiction [COEFF] 30.3033

[P] Two men in white uniforms and blue helmets are playing on a ball field.

[H] The men are not wearing helmets.

[LABEL] contradiction [PRED] contradiction [COEFF] 23.5146

[P] A man in a pink swimsuit is standing on a platform above a crowd.

[H] A man is not wearing any clothes.

[LABEL] contradiction [PRED] contradiction [COEFF] 22.0325

[P] A young girl wearing dark sweatpants and a zip up jacket swings a badminton racket.

[H] The girl is not wearing clothes.

[LABEL] contradiction [PRED] contradiction [COEFF] 21.7330

[P] Five girls wearing orange shirts and one legging dancing at a game.

[H] The girls are not wearing clothes.

[LABEL] contradiction [PRED] contradiction [COEFF] 21.1118

[P] A group of men in reflective gear are holding light sticks while standing on a wooden floor that has outdoor lighting.

[H] The men are not wearing reflective gear.

[LABEL] contradiction [PRED] contradiction [COEFF] 19.5412

[P] A person wearing a hat and glasses sits on a cliff and smiles.

[H] The person is not wearing hat.

[LABEL] contradiction [PRED] contradiction [COEFF] 18.5189

[P] The baby girl wearing floral long - sleeve is standing.

[H] The girl is not wearing any clothes.

[LABEL] contradiction [PRED] contradiction [COEFF] 17.7958

[P] A man wearing a heavy green work jacket and orange ear protectors is smiling at the camera.

[H] The man does not own a work jacket.

[LABEL] contradiction [PRED] contradiction [COEFF] 17.3472

[P] Racing greyhound dog wearing number 8.

[H] The greyhound is not wearing a number.

[LABEL] contradiction [PRED] contradiction [COEFF] 16.8903

[P] Little boy in a yellow jacket

[H] A boy is not wearing a yellow jacket.

[LABEL] contradiction [PRED] contradiction [COEFF] 16.6164

[P] A girl with a toboggan and sunglasses smiles with her friend in the background as they do crafts.

[H] The girl with the toboggan is not wearing sunglasses.

[LABEL] contradiction [PRED] contradiction [COEFF] 16.2174

[P] A man in a bright green flux shirt walks along a crowded sidewalk under metal scaffolding at night.



[H] A man has no shirt on.

[LABEL] **contradiction** [PRED] **contradiction** [COEFF] 16.0768

[P] Guy with white shirt stirring something in a pot on the stove.

[H] The man isn't wearing a shirt.

## 1.271 Component 270

[LABEL] **entailment** [PRED] **entailment** [COEFF] 27.3107

[P] A man and a child play near a fountain.

[H] Some people are playing.

[LABEL] **entailment** [PRED] **entailment** [COEFF] 26.7312

[P] A small group of black adults and children are walking on a brown surface.

[H] Some people are walking on a brown surface.

[LABEL] **entailment** [PRED] **entailment** [COEFF] 25.5417

[P] Three young people planting flowers and covering the area with a tarp.

[H] Some people are planting flowers.

[LABEL] **entailment** [PRED] **entailment** [COEFF] 25.5146

[P] A group of women talk outside of a store.

[H] Some people talk.

[LABEL] **entailment** [PRED] **entailment** [COEFF] 24.6524

[P] A construction crew is waiting around with yellow and orange jackets.

[H] Some people are near jackets.

[LABEL] **entailment** [PRED] **entailment** [COEFF] 23.5427

[P] Several people move through a long alleyway near a parked motorized scooter.

[H] Some people are in an alley

[LABEL] **entailment** [PRED] **entailment** [COEFF] 23.5039

[P] A group of young people in bathing suits attending a foam party.

[H] Some people are in a foam party.

[LABEL] **entailment** [PRED] **entailment** [COEFF] 23.3193

[P] A couple of people are walking by a shop with a sign on it that is written in an asian language and there is graffiti on the wall.

[H] Some people are walking by a sign.

[LABEL] **entailment** [PRED] **entailment** [COEFF] 23.2222

[P] A group of asian teenagers wearing red t - shirts sit on steps.

[H] Some people are sitting.

[LABEL] **entailment** [PRED] **entailment** [COEFF] 22.4024

[P] Two men surf on a cresting wave.

[H] Some people are surfing.

[LABEL] **entailment** [PRED] **entailment** [COEFF] 22.1327

[P] A group of people rest on a park bench underneath the shade of the canopy of trees as a man in a brightly colored pink stripe shirt walks past.

[H] Some people are resting in the shade.

[LABEL] **neutral** [PRED] **entailment** [COEFF] 22.0324

[P] Several young people in red shirts are sitting on steps.

[H] Some kids in red are sitting.

[LABEL] **entailment** [PRED] **entailment** [COEFF] 21.7110

[P] A group of hikers resting near a tree.

[H] Some hikers are by a tree.

[LABEL] **entailment** [PRED] **entailment** [COEFF] 21.5599

[P] Four women in red bathing suits are performing a synchronized swimming routine in front of an audience.

[H] Some women are doing synchronized swimming.

[LABEL] **entailment** [PRED] **entailment** [COEFF] 21.5307

[P] A group of people are holding presents in a room with a christmas tree.

[H] Some people hold presents.

[LABEL] **entailment** [PRED] **entailment** [COEFF] 21.3008

[P] A team of girl soccer players are running down the field chasing the ball.

[H] Some girls are playing soccer.

## 1.272 Component 271

[LABEL] **neutral** [PRED] **entailment** [COEFF] 57.1365

[P] The girl in a pink shirt jumps high over the grass.

[H] A girl is playing.

[LABEL] **entailment** [PRED] **entailment** [COEFF] 56.4897

[P] Young boy wearing a white bathing suit is jumping up in the pool.

[H] A kid is playing in the pool.

[LABEL] **entailment** [PRED] **entailment** [COEFF] 53.8611

[P] A boy is jumping over shallow water near some large rocks.

[H] The boy is playing by the rocks.

[LABEL] **entailment** [PRED] **entailment** [COEFF] 48.4772

[P] A man in water throwing a little boy up in the air and waiting for him to come down so he can catch him.

[H] A man is playing with a boy.

[LABEL] **entailment** [PRED] **entailment** [COEFF] 47.8767  
[P] A man in water throwing a little boy up in the air and waiting for him to come down so he can catch him.  
[H] A man playing with a little boy in water.

[LABEL] **entailment** [PRED] **entailment** [COEFF] 47.1667  
[P] A dog is jumping over a series of colored gates.  
[H] The dog is playing outside.

[LABEL] **entailment** [PRED] **entailment** [COEFF] 45.6970  
[P] A brown dog is running on a snow covered path.  
[H] There is a brown dog playing in the snow.

[LABEL] **neutral** [PRED] **neutral** [COEFF] 44.7372  
[P] A black and white dog jumps after a yellow toy.  
[H] The dog is playing.

[LABEL] **contradiction** [PRED] **neutral** [COEFF] 44.2482  
[P] Three children standing by a pool are covered in foam bubbles.  
[H] Childrens are playing

[LABEL] **entailment** [PRED] **entailment** [COEFF] 44.1410  
[P] A little shirtless boy in shorts splashes water.  
[H] A child is playing in the water.

[LABEL] **neutral** [PRED] **entailment** [COEFF] 43.2505  
[P] A small child with blue sandals rides a scooter near the beach.  
[H] A child is playing near the beach.

[LABEL] **entailment** [PRED] **neutral** [COEFF] 41.3108  
[P] A little boy holds a decorated cardboard box on his head.  
[H] The little boy is playing with a box.

[LABEL] **neutral** [PRED] **entailment** [COEFF] 40.9677  
[P] A brown dog is jumping up at a woman in a black coat.  
[H] A woman is playing with her dog.

[LABEL] **neutral** [PRED] **neutral** [COEFF] 40.6332  
[P] The two dogs are running through the water side by side.  
[H] The dogs are playing in the water.

[LABEL] **neutral** [PRED] **entailment** [COEFF] 40.1377  
[P] Two black dogs are jumping towards each other.  
[H] Two dogs are playing with each other

[LABEL] **neutral** [PRED] **entailment** [COEFF] 39.8610

[P] A white dog is splashing through the water.  
[H] A dog is playing in the water.

### 1.273 Component 272

[LABEL] **neutral** [PRED] **contradiction** [COEFF] 19.6799

[P] A black dog plays in the water.  
[H] A black dog plays in a rain puddle.

[LABEL] **contradiction** [PRED] **contradiction** [COEFF] 15.4494

[P] A little boy wearing swim trunks plays in the ocean.  
[H] A boy playing in the sand box

[LABEL] **contradiction** [PRED] **contradiction** [COEFF] 13.0468

[P] A boy and girl play in water.  
[H] A boy and girl play in the mud.

[LABEL] **contradiction** [PRED] **contradiction** [COEFF] 12.6787

[P] A man and a woman kissing in the ocean  
[H] Two men are hugging in the rain

[LABEL] **contradiction** [PRED] **contradiction** [COEFF] 12.3395

[P] Man surfing on a wave in the ocean  
[H] A man is kayaking down a river.

[LABEL] **contradiction** [PRED] **contradiction** [COEFF] 12.1601

[P] A boy and his dog are watching an object in the water.  
[H] A boy and dog are standing near the restrooms in a crowded campsite.

[LABEL] **neutral** [PRED] **contradiction** [COEFF] 12.1346

[P] A young girl wearing purple running through water  
[H] The girl plays in the rain.

[LABEL] **contradiction** [PRED] **contradiction** [COEFF] 11.2698

[P] A man fishes under a large tree.  
[H] A man is hunting ducks in a field.

[LABEL] **contradiction** [PRED] **contradiction** [COEFF] 10.4873

[P] A shirtless man leaps into the water as other people watch.  
[H] A man is doing flips from the clouds into rain as the gods watch him.

[LABEL] **contradiction** [PRED] **contradiction** [COEFF] 9.6847

[P] This man is getting ready to go snorkeling in the water behind him.  
[H] Two goldfish are riding bikes in a giant pile of mashed potatoes.

[LABEL] **contradiction** [PRED] **contradiction** [COEFF] 9.3522

[P] There is a man and woman at a beach jumping straight up in the air hold hand and smiling.  
[H] There is a man and woman at a park walking down a path and hold hands and smiling.

[LABEL] contradiction [PRED] contradiction [COEFF] 9.3292

[P] Girl splashing in kiddie pool  
[H] A girl playing in a sandbox.

[LABEL] contradiction [PRED] contradiction [COEFF] 9.2113

[P] A young girl is standing on the shore and pointing to the ocean.  
[H] There is a girl that is in sitting on a bench at the park.

[LABEL] contradiction [PRED] contradiction [COEFF] 8.8426

[P] The young man is surfing.  
[H] A boy is playing in a sandbox.

[LABEL] contradiction [PRED] contradiction [COEFF] 8.6538

[P] Two young girls are playing with squirt guns in a pool.  
[H] Two girls are sitting around a campfire.

[LABEL] contradiction [PRED] contradiction [COEFF] 8.5026

[P] Young boy in a red shirt playing near water.  
[H] The boy is standing on a field.

## 1.274 Component 273

[LABEL] contradiction [PRED] contradiction [COEFF] 21.4820

[P] A man in a brown jacket is carving stone with a hammer and chisel.  
[H] A woman is carving stone

[LABEL] contradiction [PRED] contradiction [COEFF] 18.1400

[P] A man in a gray coat speaks into a microphone.  
[H] A woman is speaking into a microphone.

[LABEL] contradiction [PRED] contradiction [COEFF] 16.6595

[P] A man in a red shirt and wearing a white bandanna on his head is sitting on a sound stage.  
[H] A woman sits on a sound stage

[LABEL] contradiction [PRED] contradiction [COEFF] 16.4828

[P] A man in a yellow shirt is sitting on a motorcycle.  
[H] A woman is sitting on a bench.

[LABEL] contradiction [PRED] contradiction [COEFF] 16.0930

[P] A man in a gray shirt is juggling batons that resemble bowling pins.  
[H] A woman is performing with a hula hoop.

[LABEL] contradiction [PRED] contradiction [COEFF] 15.5741

[P] A man wearing a swimsuit dives into a pool surrounded by a screen.

[H] A woman dives into a lake.

[LABEL] contradiction [PRED] contradiction [COEFF] 14.8780

[P] A man in a hard hat and brightly colored vest is doing work on cement steps.

[H] A woman is working on cement steps.

[LABEL] contradiction [PRED] contradiction [COEFF] 14.4880

[P] A man in a blue uniform lean against a wall with a no smoking sign.

[H] A woman leaning against a wall

[LABEL] contradiction [PRED] contradiction [COEFF] 14.4615

[P] An older man with gray hair is sitting in a chair playing a large instrument made of bamboo.

[H] A woman is playing an instrument.

[LABEL] contradiction [PRED] contradiction [COEFF] 14.4473

[P] A man in red swimming trunks pushing a baby stroller down a crowded beach.

[H] A woman pushes a baby stroller

[LABEL] contradiction [PRED] contradiction [COEFF] 14.3035

[P] A man in brown is pushing a dumpster down a sidewalk.

[H] A woman is pushing a dumpster.

[LABEL] contradiction [PRED] contradiction [COEFF] 14.2993

[P] A man in an orange hat and carrying papers lifts his pinkie finger, while holding a sign.

[H] A woman is holding sign

[LABEL] contradiction [PRED] contradiction [COEFF] 14.0688

[P] A man in a blue shirt is kicking a yellow object while other students are practicing karate in the background.

[H] A woman is teaching yoga.

[LABEL] contradiction [PRED] contradiction [COEFF] 13.9364

[P] A man talks on his mobile phone while pumping gas at a gas station.

[H] A woman is talking on her cell phone.

[LABEL] contradiction [PRED] contradiction [COEFF] 13.3363

[P] A man in a black shirt plays guitar.

[H] A woman is playing the bango.

[LABEL] contradiction [PRED] contradiction [COEFF] 13.0722

[P] A man in all white is painting over a wall covered in shiny black paint.

[H] A woman painting.

## 1.275 Component 274

[LABEL] **contradiction** [PRED] **contradiction** [COEFF] 24.0311

[P] Two toddler boys sharing a baby swing at dusk.

[H] Two boys are playing basketball.

[LABEL] **neutral** [PRED] **neutral** [COEFF] 22.3220

[P] Two boys are kicking a ball to each other in the park.

[H] They are playing soccer

[LABEL] **neutral** [PRED] **neutral** [COEFF] 22.1115

[P] A young african boy kicking a ball.

[H] The black child is practicing soccer.

[LABEL] **neutral** [PRED] **contradiction** [COEFF] 20.6786

[P] A white - haired man in a blue t - shirt carries an " earth in the balance " bag.

[H] The man carrying the bag is asian.

[LABEL] **neutral** [PRED] **neutral** [COEFF] 20.2378

[P] One guy in a red beanie and green t - shirt sitting on a skateboard.

[H] The man is dressed for christmas.

[LABEL] **contradiction** [PRED] **contradiction** [COEFF] 19.9852

[P] One woman, wearing a gray shit that has gone bowling.

[H] A woman is wearing a football helmet

[LABEL] **neutral** [PRED] **contradiction** [COEFF] 19.9212

[P] A bald man wearing a blue shirt eating.

[H] A man is eating a hot dog.

[LABEL] **neutral** [PRED] **neutral** [COEFF] 19.6276

[P] Five men dressed in red and white clothing and santa hats form a musical band composed of a trumpet player, saxophonist, a man playing an accordion and one playing a tambourine busk in front of a store window.

[H] Five santas are playing christmas tunes.

[LABEL] **contradiction** [PRED] **contradiction** [COEFF] 19.5613

[P] A bunch of kids wearing black shorts and white t - shirts, one of them, a girl, is jumping over some yellow signs.

[H] Children in the classroom learning math.

[LABEL] **contradiction** [PRED] **neutral** [COEFF] 19.2648

[P] A man in a black hat sitting with a woman with glasses.

[H] A gay couple talking

[LABEL] **neutral** [PRED] **contradiction** [COEFF] 19.2606

[P] A young man and woman dressed in play chef's hats are eating food at a table.

[H] Two children are eating pizza

[LABEL] **neutral** [PRED] **contradiction** [COEFF] 19.0515

[P] Three people in white uniforms are playing a ballgame in a grassy field.

[H] People are playing cricket in a field.

[LABEL] **neutral** [PRED] **neutral** [COEFF] 18.8096

[P] A man in a checkered blue shirt is sleeping in a recliner chair with car keys in his lap.

[H] The man fell asleep watching tv.

[LABEL] **contradiction** [PRED] **contradiction** [COEFF] 18.7663

[P] A guy with a light blue shirt, blue jeans, and rollerblades is grinding on a curved surface.

[H] The man is wearing sweatpants.

[LABEL] **contradiction** [PRED] **neutral** [COEFF] 18.4426

[P] A group of 9 friends are all taking a mid - jump picture on a beach, all bundled up in jackets and most of them with scarves.

[H] 9 friends take a mid jump picture on a beach, all wearing bathing suits.

[LABEL] **contradiction** [PRED] **neutral** [COEFF] 18.2987

[P] Three men wearing green t - shirts do a street performance.

[H] The men are drinking beer at a bar.

## 1.276 Component 275

[LABEL] **entailment** [PRED] **entailment** [COEFF] 22.8717

[P] A woman on a city street waving at a bus.

[H] The woman is waving at the bus.

[LABEL] **entailment** [PRED] **entailment** [COEFF] 19.8870

[P] A woman with long blond - hair is sitting on a stool with a piano.

[H] The woman is sitting on the piano stool.

[LABEL] **entailment** [PRED] **entailment** [COEFF] 18.3697

[P] A man with a beige coat is crossing the street carrying a bag.

[H] The man is crossing the street

[LABEL] **entailment** [PRED] **entailment** [COEFF] 17.9027

[P] A man, wearing all black clothing, is running down the street as a car comes toward him with its headlights on.

[H] The man is running

[LABEL] **entailment** [PRED] **entailment** [COEFF] 17.2839

[P] I see a woman in a black dress drying her clothes above her bathtub.

[H] The black dressed lady was drying her clothes.

[LABEL] **neutral** [PRED] **entailment** [COEFF] 16.8998

[P] A man in a pink striped shirt and jeans and a head light working on electrical components in a large



gray box.

[H] The man is working on a gray box

[LABEL] entailment [PRED] entailment [COEFF] 16.5852

[P] A woman, in a tan outfit, serving a beverage to a man in a striped shirt.

[H] The woman was serving the man a drink.

[LABEL] entailment [PRED] entailment [COEFF] 16.5377

[P] Two young men walk through a fairgrounds, one pushing a covered stroller and the other carrying a large stuffed animal and pink pillow.

[H] The two men are walking through the fairgrounds

[LABEL] neutral [PRED] entailment [COEFF] 16.1010

[P] A boy in red swimming trunks is jumping into the pool.

[H] The boy is jumping into his pool.

[LABEL] neutral [PRED] entailment [COEFF] 15.5539

[P] A young woman, with frosted brown hair, is putting on lipstick, while listening to someone on her cellphone.

[H] The young woman is putting on lipstick

[LABEL] neutral [PRED] entailment [COEFF] 14.6857

[P] A man is kneeling down with a child on a beach where bright blue and red boats are stationed in the background.

[H] The man is with his child.

[LABEL] entailment [PRED] entailment [COEFF] 14.6761

[P] A man wearing a yellow bike helmet walking his yellow bike along a sidewalk

[H] The man is walking his bike.

[LABEL] entailment [PRED] entailment [COEFF] 14.2309

[P] Sleeping white baby boy on a couch.

[H] The baby was sleeping on the couch

[LABEL] entailment [PRED] entailment [COEFF] 14.1070

[P] A man rubbing his hands on some type of metal object

[H] The man is rubbing something.

[LABEL] entailment [PRED] entailment [COEFF] 14.0179

[P] A woman walks along a street as she looks to a window display of a mannequin in a red dress.

[H] The woman is walking down the street.

[LABEL] entailment [PRED] entailment [COEFF] 13.9260

[P] A man walking up a sandy path.

[H] The man is walking

## 1.277 Component 276

[LABEL] **entailment** [PRED] **entailment** [COEFF] 24.4578

[P] A boy is jumping a rail on his bicycle.

[H] A boy is jumping a rail on his bike.

[LABEL] **entailment** [PRED] **entailment** [COEFF] 21.3976

[P] A man on a horse throws a lasso at a calf.

[H] A man on a horse.

[LABEL] **entailment** [PRED] **entailment** [COEFF] 19.9919

[P] A man on a motorcycle pops a wheelie in the dirt.

[H] A man pops a wheelie on a motorcycle.

[LABEL] **entailment** [PRED] **entailment** [COEFF] 18.8908

[P] A man jumping a bicycle over a dirt path surrounded by trees.

[H] A man on a bike.

[LABEL] **entailment** [PRED] **entailment** [COEFF] 18.0969

[P] A girl has rested her bike by a bench so that she can eat and ice cream.

[H] A girl rests her bike by a bench.

[LABEL] **entailment** [PRED] **entailment** [COEFF] 17.3512

[P] A man fixing his bicycle by some trees.

[H] A man fixes his bike.

[LABEL] **entailment** [PRED] **entailment** [COEFF] 16.9375

[P] A man walks a dog on the side of an empty road.

[H] A man walks a dog.

[LABEL] **entailment** [PRED] **entailment** [COEFF] 15.9027

[P] A man jumping a bicycle over a dirt path surrounded by trees.

[H] A man jumped over a dirt path on his bike.

[LABEL] **entailment** [PRED] **entailment** [COEFF] 14.8213

[P] A man watching a person diving into a swimming pool.

[H] A man watching a person dive.

[LABEL] **neutral** [PRED] **entailment** [COEFF] 14.3968

[P] A fat man is refueling his chevy suv outside of a store that has a sign that says terrible's beer.

[H] A man is refueling his suv.

[LABEL] **entailment** [PRED] **entailment** [COEFF] 14.2497

[P] A man riding a scooter, crosses the street, in the crosswalk.

[H] A man rides a scooter in the crosswalk.

[LABEL] **neutral** [PRED] **entailment** [COEFF] 13.8154

[P] A man on a roller scooter holding on to rope

[H] A man being pulled on a scooter.

[LABEL] **entailment** [PRED] **entailment** [COEFF] 13.4810

[P] A young boy sitting in a tree swing playing with his cat.

[H] A boy is sitting in a tree swing.

[LABEL] **entailment** [PRED] **entailment** [COEFF] 13.4749

[P] A very small boy carries a bicycle tire on his shoulder.

[H] The small boy is carrying a tire on his shoulder.

[LABEL] **neutral** [PRED] **entailment** [COEFF] 13.2736

[P] A bicycle racer runs up a ramp with his bike.

[H] A bicycle racer riding up a ramp.

[LABEL] **entailment** [PRED] **entailment** [COEFF] 13.1257

[P] The boy in the blue shirt is swinging a baseball bat towards a ball as the boy in the red helmet waits to catch him out.

[H] The boy in the blue shirt is swinging a baseball bat at the ball.

## 1.278 Component 277

[LABEL] **entailment** [PRED] **neutral** [COEFF] 167.7590

[P] A man is jumping over a low wall holding a bicycle.

[H] There is a man jumping in this picture

[LABEL] **entailment** [PRED] **neutral** [COEFF] 159.4488

[P] A man in a brown jacket has his hand in the wheel - well of a white car in tow.

[H] There is a man in this picture

[LABEL] **entailment** [PRED] **neutral** [COEFF] 155.7244

[P] A little boy with a yellow shovel is playing with dirt.

[H] There is a boy in this picture

[LABEL] **entailment** [PRED] **neutral** [COEFF] 154.5445

[P] Two children jump on a trampoline.

[H] There are two children in this picture.

[LABEL] **entailment** [PRED] **neutral** [COEFF] 151.3336

[P] Young men are in a blue car driving.

[H] There are some men in this picture

[LABEL] **entailment** [PRED] **neutral** [COEFF] 147.8897

[P] A man wearing a striped shirt smiles and points as he holds a bunch of necklaces.

[H] There is a man in this picture

[LABEL] **entailment** [PRED] **neutral** [COEFF] 146.6321

[P] Two women are having drinks and talking happily.

[H] There are two woman in this picture.

[LABEL] **entailment** [PRED] **neutral** [COEFF] 139.6789

[P] Crates of many colors are stacked against a brick wall, as a man pushes a dumpster.

[H] There is a man in this picture

[LABEL] **entailment** [PRED] **neutral** [COEFF] 134.0520

[P] A man wearing a fedora playing a guitar.

[H] There is one man in this picture, and he is playing music.

[LABEL] **entailment** [PRED] **neutral** [COEFF] 127.5796

[P] A young girl with two differently colored shoes does front flips in a large, open field.

[H] There is a young girl in this picture.

[LABEL] **entailment** [PRED] **neutral** [COEFF] 126.3360

[P] A man is on a ladder near huge tanks.

[H] There is a man outside in this picture

[LABEL] **entailment** [PRED] **neutral** [COEFF] 125.9594

[P] A group of people standing around two men sitting wearing turbans.

[H] There are a bunch of people in this picture

[LABEL] **entailment** [PRED] **neutral** [COEFF] 125.7724

[P] A man is cleaning a diving board.

[H] There is one man in the picture.

[LABEL] **entailment** [PRED] **entailment** [COEFF] 125.1632

[P] A father is spending time with his kids.

[H] There is a man and kids in this picture

[LABEL] **entailment** [PRED] **neutral** [COEFF] 124.6190

[P] A policeman assisting a young protester off the ground while the protester objects to his assistance.

[H] There are two people in this picture.

[LABEL] **entailment** [PRED] **neutral** [COEFF] 123.0428

[P] A woman reading and having a drink sitting on a bench.

[H] There is a woman in this picture

## 1.279 Component 278

[LABEL] **entailment** [PRED] **entailment** [COEFF] 26.2268

[P] A child in a green hat is being pushed in a cart by an adult.

[H] The child is in the cart.

[LABEL] entailment      [PRED] entailment      [COEFF] 21.4722  
 [P] A muslim woman is walking down the street.  
 [H] The woman is on the street.

[LABEL] entailment      [PRED] entailment      [COEFF] 21.1125  
 [P] A young boy is walking towards a seagull on the shoreline of a beach.  
 [H] A boy is on the beach.

[LABEL] entailment      [PRED] entailment      [COEFF] 20.4473  
 [P] Two black dogs are jumping in waves at the beach  
 [H] The two dogs are on the beach.

[LABEL] entailment      [PRED] entailment      [COEFF] 18.9699  
 [P] A dog is licking its nose in the grass.  
 [H] The dog is on the grass.

[LABEL] entailment      [PRED] entailment      [COEFF] 18.6519  
 [P] A young child is in front of a microphone as other people are watching.  
 [H] The child is by the microphone.

[LABEL] entailment      [PRED] entailment      [COEFF] 18.2051  
 [P] A minister in a plaid shirt marries a man wearing a shirt that says " groom " and a woman in a pink dress.  
 [H] The minister is wearing a shirt.

[LABEL] neutral          [PRED] entailment      [COEFF] 18.0207  
 [P] A little girl holds up her plate.  
 [H] The girl is holding the plate

[LABEL] entailment      [PRED] entailment      [COEFF] 18.0145  
 [P] Three girls pile on top of each other on the concrete.  
 [H] The girls are on concrete.

[LABEL] entailment      [PRED] entailment      [COEFF] 17.5495  
 [P] Two man are outdoors cooking over an open fire.  
 [H] The men cooked over the fire.

[LABEL] entailment      [PRED] entailment      [COEFF] 16.9806  
 [P] People sit on folding chairs outside in front a burning fire.  
 [H] The people are sitting by the fire.

[LABEL] neutral          [PRED] entailment      [COEFF] 16.9115  
 [P] A guy sitting on the side of the road playing an accordion.  
 [H] The guy is on the road with an accordion.

[LABEL] entailment      [PRED] entailment      [COEFF] 16.7806  
 [P] A street vendor is set up in the middle of a street with his cart.

[H] A street vendor is with his cart.

[LABEL] **contradiction** [PRED] **entailment** [COEFF] 16.4483

[P] Three men rest on the turret of a tank.

[H] The men are in the tank.

[LABEL] **entailment** [PRED] **entailment** [COEFF] 16.2366

[P] A man is placing his first foot into a box filled with water.

[H] A man puts his foot in water.

[LABEL] **entailment** [PRED] **entailment** [COEFF] 16.0921

[P] A person is running on a wooded street with the sun in the background.

[H] The person on the street.

## 1.280 Component 279

[LABEL] **contradiction** [PRED] **contradiction** [COEFF] 3.1360

[P] A group of people sitting at a table.

[H] People are walking down the street.

[LABEL] **contradiction** [PRED] **contradiction** [COEFF] 3.0569

[P] A boy and a person off - camera playing a card game.

[H] People are reading a newspaper.

[LABEL] **contradiction** [PRED] **contradiction** [COEFF] 2.9871

[P] A group of asian people are looking at art in a window.

[H] The people are watching movies.

[LABEL] **contradiction** [PRED] **contradiction** [COEFF] 2.9486

[P] Two male individuals observing the contents of a table of books at a sidewalk sale.

[H] The men are checking out cars at the dealership.

[LABEL] **contradiction** [PRED] **contradiction** [COEFF] 2.8993

[P] A crowd forms on a busy street to watch a street performer.

[H] A crowd gathers to watch an air show at an airfield.

[LABEL] **contradiction** [PRED] **contradiction** [COEFF] 2.7167

[P] Several people sit at computers working, in a large room with big windows.

[H] Several people are playing basketball at the park.

[LABEL] **contradiction** [PRED] **contradiction** [COEFF] 2.6586

[P] A black and white dog is chewing on a camera.

[H] A dog snarls at a pine tree.

[LABEL] **contradiction** [PRED] **contradiction** [COEFF] 2.6221

[P] A guy is holding a girl, while another rests on his shoulder on a metro train.

[H] A group is in a house.

[LABEL] **contradiction** [PRED] **contradiction** [COEFF] 2.5098

[P] A man in a leather apron who appears to be a blacksmith holds up a glowing hot piece of iron which he is working on with the hammer in his right hand, the forge fire conspicuous in the background.

[H] A man is in the ocean trying to make fire.

[LABEL] **contradiction** [PRED] **contradiction** [COEFF] 2.4725

[P] Four children in bathing suits are sitting in a canoe at the shore of a lake.

[H] Children are playing in the snow

[LABEL] **contradiction** [PRED] **contradiction** [COEFF] 2.4687

[P] A woman in a beige skirt stands and watches a band made up of mostly women band members.

[H] A woman sits down in the library.

[LABEL] **contradiction** [PRED] **contradiction** [COEFF] 2.4563

[P] A man creates a sculpture with a hammer and chisel.

[H] A man attempting to create a car.

[LABEL] **contradiction** [PRED] **contradiction** [COEFF] 2.4379

[P] Boy with floaties with his feet in the sand on the beach.

[H] The boy is in a car.

[LABEL] **contradiction** [PRED] **contradiction** [COEFF] 2.3888

[P] Young boys and girls practice martial arts while being graded by peers and teachers sitting around the mats in a dojo.

[H] Young boys and girls are at a water park

[LABEL] **contradiction** [PRED] **contradiction** [COEFF] 2.3519

[P] A man is at an overlook point staring out across a valley by using binoculars.

[H] A man drives on a lonely highway.

[LABEL] **contradiction** [PRED] **contradiction** [COEFF] 2.3403

[P] A woman with reddish hair applies mascara to her eyelashes.

[H] A woman is going for a jog.

## 1.281 Component 280

[LABEL] **contradiction** [PRED] **contradiction** [COEFF] 5.5743

[P] A man in a red shirt is sitting on the grass, and a ball is flying towards him.

[H] A man in a pink shirt sits in the stands and watches a ball flying off into the distance.

[LABEL] **contradiction** [PRED] **contradiction** [COEFF] 4.5575

[P] A boy in a blue shirt with dirt on his face

[H] The boy has a pink shirt.

[LABEL] **contradiction** [PRED] **contradiction** [COEFF] 4.4490

[P] Man and a woman kayaking.

[H] The man and woman are dancing.

[LABEL] contradiction [PRED] contradiction [COEFF] 4.3366

[P] A man in blue pants is behind a car parked on grass outside of a brick gateway.

[H] The man has pink pants.

[LABEL] contradiction [PRED] contradiction [COEFF] 4.1726

[P] The man in the red shirt is playing the umbrella!

[H] The man is wearing a purple shirt.

[LABEL] contradiction [PRED] contradiction [COEFF] 4.0506

[P] A young boy wearing an orange helmet riding a scooter

[H] The young girl is wearing her pink helmet while riding her scooter

[LABEL] contradiction [PRED] contradiction [COEFF] 4.0105

[P] A man in a red shirt is performing an aerial trick with a skateboard on a sidewalk.

[H] A man has a purple shirt.

[LABEL] contradiction [PRED] contradiction [COEFF] 3.9952

[P] A woman wearing a scarf is tailgating.

[H] A woman eats ice cream in the cafeteria.

[LABEL] contradiction [PRED] contradiction [COEFF] 3.8222

[P] A boy wearing a blue shirt is going down a slide.

[H] The boy is wearing a green shirt

[LABEL] contradiction [PRED] contradiction [COEFF] 3.8081

[P] A man in a blue shirt blowing a trumpet.

[H] A man in a pink shirt riding his bike.

[LABEL] contradiction [PRED] contradiction [COEFF] 3.7492

[P] Young kid in a blue shirt is doing a trick on his rollerblades.

[H] A child is swimming.

[LABEL] contradiction [PRED] contradiction [COEFF] 3.7350

[P] Little boy dressed up in a gladiator costume while his mom takes a picture.

[H] A little girl dressed up as a princess is skipping.

[LABEL] contradiction [PRED] contradiction [COEFF] 3.7138

[P] A man in a yellow vest sweeping a sidewalk.

[H] A man in a dress shirt pooping on a sidewalk.

[LABEL] contradiction [PRED] contradiction [COEFF] 3.6488

[P] A pretty young woman wearing a blue ruffled shirt smelling a pretty red flower.

[H] The woman is wearing a orange ruffled shirt.



[LABEL] **contradiction** [PRED] **contradiction** [COEFF] 3.4659  
[P] A hockey player with warrior equipment with a look of apprehension on his place  
[H] A soccer player with warrior equipment with a look of apprehension on his place

[LABEL] **contradiction** [PRED] **contradiction** [COEFF] 3.4632  
[P] A man in a sling sits in a blue room with a boy and a woman.  
[H] The woman sits wearing a cast in a pink room.

## 1.282 Component 281

[LABEL] **entailment** [PRED] **entailment** [COEFF] 31.6886  
[P] A man is cruising through a dirty river on a long boat.  
[H] The man is on the river.

[LABEL] **entailment** [PRED] **entailment** [COEFF] 28.5033  
[P] A boy performs a stunt on a skateboard in a skate park.  
[H] The boy is at the skate park.

[LABEL] **entailment** [PRED] **entailment** [COEFF] 25.0856  
[P] A dark - haired man in a red t - shirt, with a beard, playing the guitar in a park.  
[H] The man is in the park.

[LABEL] **entailment** [PRED] **entailment** [COEFF] 24.5675  
[P] A worker taking a reading on a subway train.  
[H] The worker is on the subway.

[LABEL] **entailment** [PRED] **entailment** [COEFF] 24.5016  
[P] A white swan is skimming across the surface of the water.  
[H] The swan is in the water.

[LABEL] **entailment** [PRED] **entailment** [COEFF] 22.8379  
[P] A boy standing next to a desk in classroom.  
[H] The boy is in a classroom.

[LABEL] **entailment** [PRED] **entailment** [COEFF] 22.8277  
[P] A young woman is making rugs in the rain forest  
[H] The woman is in the rain forest.

[LABEL] **neutral** [PRED] **entailment** [COEFF] 22.7659  
[P] A person standing on a ridge in the desert.  
[H] The person is in the desert.

[LABEL] **neutral** [PRED] **entailment** [COEFF] 22.7589  
[P] A man takes a walk on the pier.  
[H] The man is on the pier

[LABEL] entailment [PRED] entailment [COEFF] 20.9383

[P] A child playing in water.

[H] The child is in water.

[LABEL] entailment [PRED] entailment [COEFF] 20.8314

[P] A man surfs on a huge green wave.

[H] The man is in the water.

[LABEL] entailment [PRED] entailment [COEFF] 19.8377

[P] A dog carries a stick through the woods.

[H] The dog is out in the woods.

[LABEL] entailment [PRED] entailment [COEFF] 19.2798

[P] A young girl swims in the pool with water noodles of varying colors.

[H] The girl is in the water.

[LABEL] entailment [PRED] entailment [COEFF] 19.2734

[P] A woman is shopping for a stove top in a home improvement store and has found one that she likes.

[H] The woman is in the store.

[LABEL] entailment [PRED] entailment [COEFF] 18.8602

[P] Three men inspecting a bicycle on a street.

[H] The bicycle is on the street.

[LABEL] entailment [PRED] entailment [COEFF] 18.3461

[P] A jeep gets wheel high in mud.

[H] The jeep is in the mud.

## 1.283 Component 282

[LABEL] contradiction [PRED] contradiction [COEFF] 46.0291

[P] A fisherman in a hat gathering his nets in murky water near the shore.

[H] The man is swimming in the ocean.

[LABEL] contradiction [PRED] entailment [COEFF] 44.2541

[P] A kayaker is battling waves in a purple boat while wearing rain gear.

[H] A person is swimming.

[LABEL] contradiction [PRED] neutral [COEFF] 42.9274

[P] A barefoot boy with a blue and white striped towel is standing on the beach.

[H] The boy is swimming in the water.

[LABEL] contradiction [PRED] contradiction [COEFF] 40.6157

[P] Kids are playing in the sand.

[H] Kids are swimming.

[LABEL] **neutral** [PRED] **contradiction** [COEFF] 37.0295  
[P] People are standing near boats in a sandy area.  
[H] The people are at the beach.

[LABEL] **entailment** [PRED] **entailment** [COEFF] 36.9792  
[P] Two dogs playing in the sand at the beach.  
[H] There are dogs playing in the water.

[LABEL] **contradiction** [PRED] **contradiction** [COEFF] 36.8895  
[P] A woman stands next to a coastline in a blue sweatshirt and jeans holding a camera.  
[H] The woman is swimming in the ocean.

[LABEL] **contradiction** [PRED] **contradiction** [COEFF] 34.7694  
[P] A little girl patting a pile of sand on the beach.  
[H] This girl is swimming

[LABEL] **contradiction** [PRED] **contradiction** [COEFF] 34.6719  
[P] A bunch of kids in canoes on a river.  
[H] A bunch of kids swimming in the river.

[LABEL] **neutral** [PRED] **neutral** [COEFF] 34.4697  
[P] The person at the beach is wearing a pink wig.  
[H] The pink haired person is going swimming.

[LABEL] **neutral** [PRED] **contradiction** [COEFF] 34.3649  
[P] A black dog is running through the water.  
[H] A black dog is at the beach

[LABEL] **neutral** [PRED] **entailment** [COEFF] 34.3016  
[P] A man jumps into the water on a sunny day.  
[H] The man is at the beach.

[LABEL] **contradiction** [PRED] **neutral** [COEFF] 33.9059  
[P] Three males on the edge of the water with fishing gear.  
[H] Three males swimming with dolphins.

[LABEL] **contradiction** [PRED] **contradiction** [COEFF] 33.9042  
[P] Two people in life jackets in a rowboat  
[H] The people are swimming.

[LABEL] **contradiction** [PRED] **neutral** [COEFF] 32.2696  
[P] A man and woman stand on a rocky shore gazing at the waves.  
[H] The people are surfing at the lake.

[LABEL] **contradiction** [PRED] **neutral** [COEFF] 31.5451  
[P] A shirtless man wearing light blue shorts and a baseball cap stands at the front of a boat.

[H] The man is swimming.

## 1.284 Component 283

[LABEL] **contradiction** [PRED] **contradiction** [COEFF] 8.4102

[P] A woman holding a child looks out over some water.

[H] A woman is holding a popsicle for her boyfriend.

[LABEL] **contradiction** [PRED] **contradiction** [COEFF] 8.2437

[P] Two guys at the beach playing in the sand, with one friend attempting to jump - kick the other.

[H] The guys are splitting an icecream at coldstone cremery.

[LABEL] **contradiction** [PRED] **contradiction** [COEFF] 8.1872

[P] A man kneels in the snow.

[H] A man is playing basketball with his friends.

[LABEL] **contradiction** [PRED] **contradiction** [COEFF] 8.1436

[P] One african american man is looking through a microscope and there is a poster that says blood cells hanging on the wall.

[H] One african american man is using a bunson burner to cause a chemical reaction.

[LABEL] **contradiction** [PRED] **contradiction** [COEFF] 8.0956

[P] A man sitting alone in meditation in an upscale spa setting.

[H] A man is pulling up the anchor to his boat.

[LABEL] **contradiction** [PRED] **contradiction** [COEFF] 8.0928

[P] A black dog runs through the water.

[H] A dog is trying to jump up a tree.

[LABEL] **contradiction** [PRED] **contradiction** [COEFF] 7.9066

[P] A woman in a red dress next to a large wall of bricks.

[H] A woman is eating some pizza.

[LABEL] **contradiction** [PRED] **contradiction** [COEFF] 7.7807

[P] Some people standing around a smoke pit thing.

[H] Two goldfish are riding bikes in a giant pile of mashed potatoes.

[LABEL] **contradiction** [PRED] **contradiction** [COEFF] 7.7414

[P] A group of people sit on the cement steps in the woods and smile.

[H] The group of people are yelling and screaming at each other.

[LABEL] **contradiction** [PRED] **contradiction** [COEFF] 7.6719

[P] A family standing in front of tall trees

[H] A family is sitting inside and watching television.

[LABEL] **contradiction** [PRED] **contradiction** [COEFF] 7.2749

[P] People are crossing a city street intersection.

[H] The people are skipping rocks at the beach.

[LABEL] **contradiction** [PRED] **contradiction** [COEFF] 7.0947

[P] A group of people stand by a body of water.

[H] A group of people jump on trampolines

[LABEL] **contradiction** [PRED] **contradiction** [COEFF] 6.9809

[P] Two men in traditional dress walk down the street.

[H] Two men are eating hot dogs while watching tv.

[LABEL] **contradiction** [PRED] **contradiction** [COEFF] 6.8447

[P] A fruit vendor rests while awaiting customers.

[H] A fruit vendor throws tomatoes at his customers as they run away

[LABEL] **contradiction** [PRED] **contradiction** [COEFF] 6.7928

[P] A woman crossing guard standing with a stop sign

[H] A woman is playing in the grass.

[LABEL] **contradiction** [PRED] **contradiction** [COEFF] 6.7599

[P] A person standing on a sidewalk holding an advertisement while people walk by.

[H] A person is taking a swim in the ocean.

## 1.285 Component 284

[LABEL] **entailment** [PRED] **entailment** [COEFF] 22.4050

[P] A group of children playing on the street, some on bicycles, and one on a scooter, and one in a blue shirt walking.

[H] There are some people doing various activities.

[LABEL] **entailment** [PRED] **entailment** [COEFF] 20.1410

[P] Two men have a conversation by an outdoor sewing - machine.

[H] People converse outside.

[LABEL] **entailment** [PRED] **entailment** [COEFF] 19.9986

[P] A man in a red jacket and stubble stands before a mural.

[H] A man is standing next to some art.

[LABEL] **entailment** [PRED] **entailment** [COEFF] 18.2492

[P] A woman with braided hair is laughing with a man in a red shirt.

[H] Two people are talking.

[LABEL] **entailment** [PRED] **entailment** [COEFF] 16.7062

[P] Two men in light colored shirts and dark pants sit on a balcony conversing as a lone car passes below.

[H] Two men are sitting and talking.

[LABEL] entailment [PRED] entailment [COEFF] 16.3217

[P] A photographer's view of a busy street.

[H] There is a picture of traffic.

[LABEL] neutral [PRED] entailment [COEFF] 16.2885

[P] Two men, one in a blue uniform and one in a red uniform, are boxing.

[H] People are fighting.

[LABEL] entailment [PRED] entailment [COEFF] 15.4865

[P] Large group of people in white shirts march down street with flags.

[H] There are people in white shirts in a parade.

[LABEL] entailment [PRED] entailment [COEFF] 15.1845

[P] A large crowd of people are outside relaxing in the courtyard.

[H] A group of people hang out in the courtyard.

[LABEL] neutral [PRED] entailment [COEFF] 15.0329

[P] Little kids with colorful skirts over their clothes are dancing.

[H] Kids are moving about to the music.

[LABEL] neutral [PRED] entailment [COEFF] 14.9801

[P] A woman with dark hair and a blond woman in a bathing suit have cocktails on a patio.

[H] Two women have drinks poolside.

[LABEL] entailment [PRED] entailment [COEFF] 14.6933

[P] A tractor sits on the road with people with in bright vests standing by.

[H] People are outside by a tractor.

[LABEL] entailment [PRED] entailment [COEFF] 14.5710

[P] There is a highly populated beach with clear water.

[H] There are a lot of people at the beach.

[LABEL] entailment [PRED] entailment [COEFF] 14.2337

[P] A woman in a pink coat shields her eyes from the sun.

[H] The woman is covering her eyes.

[LABEL] entailment [PRED] entailment [COEFF] 14.1096

[P] Two men are sitting on a couch, conversing with one another.

[H] The two people are talking to each other.

[LABEL] entailment [PRED] entailment [COEFF] 13.8789

[P] A male, female, and young girl are on a couch.

[H] Three people are sitting on a piece of furniture.

## 1.286 Component 285

[LABEL] **contradiction** [PRED] **contradiction** [COEFF] 22.9991

[P] A black dog running through a long orange tunnel.

[H] A cat plays with a ball of yarn.

[LABEL] **contradiction** [PRED] **contradiction** [COEFF] 20.9210

[P] A yellow dog runs down a dirt path.

[H] A cat plays with yarn

[LABEL] **contradiction** [PRED] **contradiction** [COEFF] 19.8877

[P] A black and white dog jumps over a hurdle.

[H] A cat sitting on the floor

[LABEL] **contradiction** [PRED] **contradiction** [COEFF] 19.3206

[P] A white dog catching a milkbone in his mouth

[H] A cat bats a mouse.

[LABEL] **contradiction** [PRED] **contradiction** [COEFF] 18.6984

[P] A black dog looks up with his head on a blue carpeted step.

[H] A cat playing with its kittens.

[LABEL] **contradiction** [PRED] **contradiction** [COEFF] 17.8681

[P] A yellow dog plays with a soccer ball.

[H] A dog sleeping on a couch

[LABEL] **contradiction** [PRED] **contradiction** [COEFF] 16.5819

[P] A dog leaps in the air parallel to a tennis ball.

[H] A cat is inside sleeping.

[LABEL] **contradiction** [PRED] **contradiction** [COEFF] 16.2627

[P] A small brown dog is about ready to exit the water after a swim.

[H] A cat is eating from its bowl.

[LABEL] **contradiction** [PRED] **contradiction** [COEFF] 15.4045

[P] A little boy swings while his mother holds a baby.

[H] A dog sleeps in a field.

[LABEL] **contradiction** [PRED] **contradiction** [COEFF] 14.7743

[P] Dog running in water with stick in mouth

[H] A cat with a mouse.

[LABEL] **contradiction** [PRED] **contradiction** [COEFF] 14.7735

[P] A white dog with brown spots is running in a yard, chasing a ball.

[H] A cat and a mouse.

[LABEL] **contradiction** [PRED] **contradiction** [COEFF] 14.6072

[P] Black dog with black and tan face running through water.

[H] Cats are napping.

[LABEL] **contradiction** [PRED] **contradiction** [COEFF] 14.3653

[P] A dog gets ready to catch a yellow ball while standing in the sand.

[H] A cat dances.

[LABEL] **contradiction** [PRED] **contradiction** [COEFF] 14.2654

[P] A man wearing power glasses watches a dell television sitting near the window.

[H] Man sleeping on the couch

[LABEL] **contradiction** [PRED] **contradiction** [COEFF] 14.0448

[P] A large dog sniffing a smaller dog outside.

[H] Two cats outside

[LABEL] **contradiction** [PRED] **contradiction** [COEFF] 13.8353

[P] Dog running after another dog in a grassy field.

[H] Two cats snuggle warmly

## 1.287 Component 286

[LABEL] **entailment** [PRED] **entailment** [COEFF] 9.3317

[P] Four women playing hockey fight over a puck.

[H] Several people are playing a sport.

[LABEL] **entailment** [PRED] **entailment** [COEFF] 8.5882

[P] A woman playing guitar and singing in the foreground and three others performing behind her.

[H] At least one person is currently making noise.

[LABEL] **entailment** [PRED] **entailment** [COEFF] 8.4479

[P] Cyclists seated on bench prepare for the race.

[H] The bikers on the bench are getting ready to race.

[LABEL] **entailment** [PRED] **entailment** [COEFF] 7.6804

[P] Two black dogs run in a grass field with two white sheep in the background.

[H] There are animals outside.

[LABEL] **entailment** [PRED] **entailment** [COEFF] 7.4764

[P] A woman in blue and a man in red are about to kiss with foliage nearby.

[H] There are two people together.

[LABEL] **entailment** [PRED] **entailment** [COEFF] 7.4191

[P] A woman appears to be taking a break from riding her bike.

[H] A lady has stopped riding.

[LABEL] **entailment** [PRED] **entailment** [COEFF] 7.2314



[P] There is a group of 8 young children holding sticks while standing in the grass.  
[H] 8 children are standing in the grass.

[LABEL] entailment [PRED] entailment [COEFF] 7.0163  
[P] A cowboy riding a bucking horse with the letters cki marked on its backside.  
[H] The horse was branded.

[LABEL] entailment [PRED] entailment [COEFF] 6.9486  
[P] All are assembled inside the church for the prayer.  
[H] Everyone is in the church.

[LABEL] entailment [PRED] entailment [COEFF] 6.6404  
[P] A man, wearing revolutionary period clothes, is ringing a bell.  
[H] A man, wearing a revolutionary apparel is making noise with a bell.

[LABEL] entailment [PRED] entailment [COEFF] 6.3506  
[P] A man is holding a hammer in one hand and piece of hot iron.  
[H] A man holds metal and a hammer

[LABEL] entailment [PRED] entailment [COEFF] 6.3310  
[P] A man in a white shirt and a woman in a white blouse are spreading butter and jelly on their biscuits.  
[H] People are preparing food.

[LABEL] entailment [PRED] entailment [COEFF] 6.2652  
[P] Some cows cluster together.  
[H] Some cows gather

[LABEL] entailment [PRED] entailment [COEFF] 6.2297  
[P] Two people race their horses.  
[H] The horses compete.

[LABEL] entailment [PRED] entailment [COEFF] 5.9628  
[P] 3 men in a band surround by equipment with all 3 holding guitars and the man in front looking down with a shoulder strap, brown pants and a white shirt.  
[H] Several people are wielding instruments.

[LABEL] entailment [PRED] entailment [COEFF] 5.8864  
[P] Three men in kayaks battle in the rough water.  
[H] Men are kayaking in rough water.

## 1.288 Component 287

[LABEL] entailment [PRED] entailment [COEFF] 5.8140  
[P] Three healthcare professionals are looking over a chart or brochure in a nurse's station.  
[H] Three healthcare professionals are looking at a chart.

[LABEL] entailment [PRED] entailment [COEFF] 5.5167  
[P] Two bums are sitting on a sidewalk outside a peace mission in portland oregon.  
[H] Two bums are sitting on a sidewalk.

[LABEL] entailment [PRED] entailment [COEFF] 5.3163  
[P] Five people playing a board game on a table filled with snacks and candles sitting in a corner of a room with book shelves behind them.  
[H] Five people are playing a board game.

[LABEL] entailment [PRED] entailment [COEFF] 5.1432  
[P] Four women are posing for a picture.  
[H] There are four women posing for a picture.

[LABEL] entailment [PRED] entailment [COEFF] 4.9977  
[P] A woman is walking in the road wearing ugg boots in front of hutchesons'grammar school.  
[H] A woman is wearing ugg boots.

[LABEL] entailment [PRED] entailment [COEFF] 4.9408  
[P] A side view picture of 3 band members on stage performing with lead singer in the foreground.  
[H] 3 band members perform on stage.

[LABEL] entailment [PRED] entailment [COEFF] 4.7246  
[P] There are four people in a kayak riding along a body of water.  
[H] Four people riding in a kayak

[LABEL] entailment [PRED] entailment [COEFF] 4.6768  
[P] Four teens in school uniforms walk down a tropical road.  
[H] Four teens wearing school uniforms.

[LABEL] entailment [PRED] entailment [COEFF] 4.6499  
[P] Three black males on surfboards in clear, blue water and while one is on a wave, the other two are paddling.  
[H] Three men are on surfboards.

[LABEL] entailment [PRED] entailment [COEFF] 4.5810  
[P] 2 men holding a sign in front of a metal fence.  
[H] There are two men holding a sign.

[LABEL] entailment [PRED] entailment [COEFF] 4.5410  
[P] A couple is sitting on a bench with a scenic view.  
[H] A couple sits on a bench.

[LABEL] entailment [PRED] entailment [COEFF] 4.4415  
[P] There is a lady riding a bicycle on the sidewalk and people walking by a chinese restaurant.  
[H] There is a lady riding a bicycle on the sidewalk.

[LABEL] entailment [PRED] entailment [COEFF] 4.3984

[P] Two people hang from safety ropes over a giant cliff.

[H] Two people are hanging from safety ropes.

[LABEL] **entailment** [PRED] **entailment** [COEFF] 4.3969

[P] Three women, one in yellow and purple and two in black and white, are playing rugby.

[H] Three women are playing rugby.

[LABEL] **entailment** [PRED] **entailment** [COEFF] 4.2950

[P] Five men in asian inspired garb wrap clothes around their heads while people converse in the background.

[H] Five men wrap clothes around their head.

[LABEL] **entailment** [PRED] **entailment** [COEFF] 4.2901

[P] Four people standing outside of the white house.

[H] There are 4 people outside the white house.

## 1.289 Component 288

[LABEL] **neutral** [PRED] **neutral** [COEFF] 36.9328

[P] A woman wearing a black shawl walking out of a building.

[H] The woman is cold.

[LABEL] **entailment** [PRED] **neutral** [COEFF] 33.4800

[P] A man wearing a red jacket over a black shirt smokes two cigarettes at once.

[H] The man is in a cold environment.

[LABEL] **neutral** [PRED] **neutral** [COEFF] 32.8330

[P] A woman wearing a brown hat, sunglasses, jeans, white shoes and a yellow trench coat stand on the sidewalk.

[H] The hat is ugly.

[LABEL] **contradiction** [PRED] **neutral** [COEFF] 31.5336

[P] Seagulls fly in the sky over the water where a boat sails past rocks.

[H] The water is very shallow.

[LABEL] **neutral** [PRED] **neutral** [COEFF] 31.4793

[P] A young boy wearing a blue winter coat and hat, is looking carefully at flower arrangements.

[H] It is a cold winter day.

[LABEL] **contradiction** [PRED] **neutral** [COEFF] 30.2934

[P] A boy wearing shorts and a t - shirt shades his eyes from the sun while resting on a boulder and cooling his feet in the slowly - moving, rocky, shallow river.

[H] It is night.

[LABEL] **neutral** [PRED] **neutral** [COEFF] 28.1612

[P] A woman sleeps behind the counter of a shop.

[H] The woman is homeless.

[LABEL] **contradiction** [PRED] **neutral** [COEFF] 25.8854

[P] A man sits on a beach wearing swim trunks and a lei, holding a blue umbrella over his head.

[H] It is cold

[LABEL] **entailment** [PRED] **neutral** [COEFF] 25.4837

[P] An older women in several layers of clothes knits an item as, she sits near a set of stairs.

[H] The woman is very cold as she knits more items.

[LABEL] **neutral** [PRED] **neutral** [COEFF] 25.3142

[P] People walking down a street with tall buildings.

[H] The weather is cloudy

[LABEL] **neutral** [PRED] **neutral** [COEFF] 24.9378

[P] A blond - haired boy sits on a bus while gazing out the window towards an intersection in a city.

[H] The boy is bored.

[LABEL] **entailment** [PRED] **neutral** [COEFF] 24.5772

[P] Several younger people walking down a street in heavy clothing.

[H] People are dressed for cold weather.

[LABEL] **neutral** [PRED] **neutral** [COEFF] 24.1701

[P] There are old buildings in the distance along a brick road.

[H] The buildings on the road are abandoned.

[LABEL] **contradiction** [PRED] **neutral** [COEFF] 23.6234

[P] A group of people are standing around a water fountain getting wet.

[H] There was a water shortage and people looked sad around the fountain.

[LABEL] **neutral** [PRED] **neutral** [COEFF] 23.3817

[P] A young brunette male comforting a young girl in a red jacket.

[H] The girl is crying.

[LABEL] **neutral** [PRED] **neutral** [COEFF] 23.3788

[P] A man wearing a striped shirt is smoking a cigarette on the street

[H] The man is homeless.

## 1.290 Component 289

[LABEL] **contradiction** [PRED] **contradiction** [COEFF] 22.5210

[P] A young woman in a brown shirt is in a kitchen, rubbing a piece of paper on a cookie sheet.

[H] Nobody has a shirt

[LABEL] **contradiction** [PRED] **contradiction** [COEFF] 20.2737

[P] A boy wearing a fireman's hat holds a small flower in one hand and a saw in the other.

[H] Nobody has a hat

[LABEL] contradiction [PRED] contradiction [COEFF] 19.0115

[P] Man holding a blue sash that is around a woman wearing a black robe.

[H] Nobody has a robe.

[LABEL] contradiction [PRED] contradiction [COEFF] 18.9882

[P] A woman holding a food serving tray standing by a window.

[H] Nobody has a tray

[LABEL] contradiction [PRED] contradiction [COEFF] 18.8929

[P] A man with a hat has a cat on his shoulder.

[H] Nobody has a cat.

[LABEL] contradiction [PRED] contradiction [COEFF] 18.7695

[P] A white dog is in the air with a ball in its mouth.

[H] Nobody has a ball

[LABEL] contradiction [PRED] contradiction [COEFF] 17.5838

[P] A father and son wearing suspenders and cowboy hats.

[H] Nobody has suspenders

[LABEL] contradiction [PRED] contradiction [COEFF] 16.4744

[P] Woman in a red tank top prepares ingredients for a cooking recipe for a man and another woman.

[H] Nobody has a top

[LABEL] contradiction [PRED] contradiction [COEFF] 14.2950

[P] A girl with love tattooed on the inside of her wrist lays in the grass.

[H] Nobody has a tattoo

[LABEL] contradiction [PRED] contradiction [COEFF] 13.5899

[P] The woman is placing an orange rose as a boutonniere on the man's suit jacket collar.

[H] Nobody has a jacket.

[LABEL] contradiction [PRED] contradiction [COEFF] 13.3747

[P] A man in a lab coat wearing glasses and looking at a computer monitor.

[H] Nobody is wearing glasses

[LABEL] contradiction [PRED] contradiction [COEFF] 13.3476

[P] Two women in pink saris, a woman in a black sari, a man with a yellow scarf and a man with a blue jacket buy vegetables from a street vendor, who is wearing a pink shirt.

[H] Nobody is wearing a sari.

[LABEL] contradiction [PRED] contradiction [COEFF] 11.0574

[P] This is two black children dressed the same hugging.

[H] Nobody is hugging

[LABEL] contradiction [PRED] contradiction [COEFF] 10.5022

[P] A man in a blue shirt places kebabs and burgers on a grill.

[H] Nobody near a grill

[LABEL] **contradiction** [PRED] **contradiction** [COEFF] 9.9180

[P] A man in a green sweatshirt and jeans pushes a bike with a cart attached to it down a street.

[H] Nobody is using a cart.

[LABEL] **contradiction** [PRED] **contradiction** [COEFF] 9.6646

[P] A person wearing a long brown coat is taking a picture of a building while two other people stand by.

[H] Nobody has a coat

## 1.291 Component 290

[LABEL] **neutral** [PRED] **neutral** [COEFF] 42.4081

[P] A man leaning against a wall near a red car.

[H] The man is tired.

[LABEL] **neutral** [PRED] **neutral** [COEFF] 39.7473

[P] Boy leaning on rock next to drop off.

[H] The boy is tired.

[LABEL] **neutral** [PRED] **neutral** [COEFF] 39.4031

[P] A white man is laying down in a small tent.

[H] The man is tired.

[LABEL] **neutral** [PRED] **neutral** [COEFF] 37.8852

[P] Two children lie in the display bed in a store that sells linens.

[H] The children are very tired.

[LABEL] **neutral** [PRED] **neutral** [COEFF] 35.6657

[P] A woman rides a horse near a frozen lake in the winter time.

[H] The horse is tired from the cold weather.

[LABEL] **neutral** [PRED] **neutral** [COEFF] 35.0607

[P] Younger kids sitting and lying on the ground around clothing and trash.

[H] The children are tired.

[LABEL] **neutral** [PRED] **neutral** [COEFF] 34.6570

[P] Two crossing guards wait on a street corner.

[H] The corner is dangerous

[LABEL] **entailment** [PRED] **neutral** [COEFF] 34.4499

[P] Two men wearing sunglasses sleeping in a car.

[H] The men are tired

[LABEL] **neutral** [PRED] **neutral** [COEFF] 33.5301  
 [P] A woman dressed in black is silhouetted against a cloud darkened sky.  
 [H] The woman is tired

[LABEL] **neutral** [PRED] **neutral** [COEFF] 26.8540  
 [P] A woman is about to race around a track.  
 [H] The lady is nervous about the race.

[LABEL] **neutral** [PRED] **neutral** [COEFF] 26.4432  
 [P] A woman leaning her head on a man's shoulder.  
 [H] The woman is sad.

[LABEL] **neutral** [PRED] **neutral** [COEFF] 24.9535  
 [P] Two workers wearing tools, boots, and hard hats are working on the steel beams of a structure.  
 [H] The workers are tired.

[LABEL] **neutral** [PRED] **neutral** [COEFF] 24.0013  
 [P] A worker in an orange work suit is kneeling down inspecting a piece of machinery.  
 [H] There is something wrong with the machine.

[LABEL] **neutral** [PRED] **neutral** [COEFF] 23.5514  
 [P] A hockey player in uniform is sitting on a hockey court.  
 [H] A hockey player is tired.

[LABEL] **neutral** [PRED] **neutral** [COEFF] 23.4170  
 [P] A child is pointing at a typewriter.  
 [H] The child is confused.

[LABEL] **neutral** [PRED] **neutral** [COEFF] 23.2142  
 [P] A black dog is digging in the snow.  
 [H] The dog is angry

## 1.292 Component 291

[LABEL] **contradiction** [PRED] **contradiction** [COEFF] 7.3890  
 [P] A man is talking on his cellphone while looking at his laptop.  
 [H] The man is running down the street.

[LABEL] **contradiction** [PRED] **contradiction** [COEFF] 6.5814  
 [P] A black man is sitting in his chair staring off into the distance.  
 [H] A man is dancing at a disco

[LABEL] **contradiction** [PRED] **contradiction** [COEFF] 5.8024  
 [P] There is a man asleep, at the door of a barber shop.  
 [H] There is a man asleep in the ocean.

[LABEL] contradiction [PRED] contradiction [COEFF] 5.7608

[P] A small girl draws colors inside a book with crayons.

[H] A little girl is riding her bicycle down the street.

[LABEL] contradiction [PRED] contradiction [COEFF] 5.5221

[P] A young man in a white t - shirt sings into a microphone while others play musical instruments in the background.

[H] The man is asleep on a sandy beach.

[LABEL] contradiction [PRED] contradiction [COEFF] 5.4989

[P] A guy wearing protective gear is welding a steel beam.

[H] A guy is drinking in a bar.

[LABEL] contradiction [PRED] contradiction [COEFF] 5.3946

[P] A man and a woman are working on the wheel of a vehicle.

[H] A man and woman are eating lunch at a cafe

[LABEL] contradiction [PRED] contradiction [COEFF] 5.3895

[P] A man in sunglasses with a brown coat is smoking a cigarette and scratches his nose as patrons purchase items from a street stand.

[H] A man with sunglasses is riding a bike.

[LABEL] contradiction [PRED] contradiction [COEFF] 5.3697

[P] A woman wearing a short skirt, yellow top, and denim jacket stands in front of a brick building covered with worn out signs.

[H] A woman in a wedding gown stands in front of a chapel.

[LABEL] contradiction [PRED] contradiction [COEFF] 5.3548

[P] Two males are fighting with a shovel and the top of a grill.

[H] Two males went white water rafting

[LABEL] contradiction [PRED] contradiction [COEFF] 5.2678

[P] A group of people at an outside event, some pouring beers, others chatting.

[H] A group of people are sitting in the church.

[LABEL] contradiction [PRED] contradiction [COEFF] 5.2111

[P] A girl and boy are running towards the camera while several people walk around them.

[H] A group is seated in an airplane.

[LABEL] contradiction [PRED] contradiction [COEFF] 5.2056

[P] Several people noticing a couple who seems to be painted in silver paint.

[H] Several people are sleeping on a bus.

[LABEL] contradiction [PRED] contradiction [COEFF] 5.1155

[P] A male is sitting in a chair with a blue surgical mask on.

[H] A man is standing in front of a snack machine.



[LABEL] **contradiction** [PRED] **contradiction** [COEFF] 5.0053

[P] A child in a wheelchair is moving around a room.

[H] A child walks on a baseball field.

[LABEL] **contradiction** [PRED] **contradiction** [COEFF] 4.8549

[P] This woman is touching her hair while standing in front of some red and white background.

[H] The woman is sitting in the swing.

## 1.293 Component 292

[LABEL] **entailment** [PRED] **entailment** [COEFF] 10.3470

[P] A little boy is playing in water in the street and wearing a wet t - shirt, as a man in a red shirt and a woman in a blue shirt are walking on the sidewalk behind him.

[H] A boy is playing in the water.

[LABEL] **entailment** [PRED] **entailment** [COEFF] 9.9745

[P] A child is jumping into the water next to a pile of seaweed.

[H] A child jumps into the water.

[LABEL] **entailment** [PRED] **entailment** [COEFF] 9.6530

[P] A young child is playing in a water tank with toys.

[H] A child is playing in water.

[LABEL] **entailment** [PRED] **entailment** [COEFF] 9.5048

[P] A dog enjoys playing in the water at the edge of a field.

[H] A dog is playing in the water.

[LABEL] **entailment** [PRED] **entailment** [COEFF] 9.2540

[P] A young boy in a swimming suit sits in water.

[H] A boy sits in water.

[LABEL] **entailment** [PRED] **entailment** [COEFF] 9.0904

[P] A little girl with blond - hair plays in the water at the edge of a rocky beach.

[H] A little girl plays by the water at the beach

[LABEL] **entailment** [PRED] **entailment** [COEFF] 8.9058

[P] A young girl walks beside a stream.

[H] A girl walks beside the water

[LABEL] **neutral** [PRED] **entailment** [COEFF] 8.8561

[P] A young man in clear blue water holds up a large starfish.

[H] A young man in the ocean holds up a starfish.

[LABEL] **entailment** [PRED] **entailment** [COEFF] 8.8060

[P] A dog runs in a grassy field.

[H] A dog is running across a field of grass.

[LABEL] **entailment** [PRED] **entailment** [COEFF] 8.7979

[P] A man jumping off of rocks into a pool of water.

[H] A man jumps into a pool.

[LABEL] **entailment** [PRED] **entailment** [COEFF] 8.5905

[P] A young girl in an orange bathing suit plays on the beach's shore.

[H] A young girl at the beach.

[LABEL] **entailment** [PRED] **entailment** [COEFF] 8.4928

[P] Two dogs run in the water.

[H] Dogs run in the water.

[LABEL] **entailment** [PRED] **entailment** [COEFF] 8.4694

[P] A white dog is leaping into a swimming pool.

[H] A dog is jumping into the pool.

[LABEL] **entailment** [PRED] **entailment** [COEFF] 8.4521

[P] A boy is swimming in open water.

[H] The boy is in open water.

[LABEL] **entailment** [PRED] **entailment** [COEFF] 8.4372

[P] A dog is running along the beach beside the ocean.

[H] A dog runs by the ocean.

[LABEL] **neutral** [PRED] **entailment** [COEFF] 8.3406

[P] Two children playing in the sand.

[H] Kids are playing at the beach.

## 1.294 Component 293

[LABEL] **entailment** [PRED] **entailment** [COEFF] 10.1571

[P] A man with his hand raised.

[H] A person with their hand up.

[LABEL] **neutral** [PRED] **entailment** [COEFF] 9.9422

[P] A string instrument band and chorus singers rehearsing.

[H] A group of musicians and singers practice.

[LABEL] **entailment** [PRED] **entailment** [COEFF] 8.9592

[P] The young worker in blue mops up the dining room.

[H] A person cleans up the room.

[LABEL] **entailment** [PRED] **entailment** [COEFF] 8.6348

[P] A professional bicyclist wearing a yellow shirt and black shorts rides by an old building.

[H] A cyclist wears a yellow shirt and rides by an old building.

[LABEL] entailment [PRED] entailment [COEFF] 7.5405

[P] A man giving a lecture in a microphone.

[H] A man is lecturing into a microphone.

[LABEL] entailment [PRED] entailment [COEFF] 7.5285

[P] A man in costume plays the keyboard in front of a sign reading " sin with sebastian ".

[H] A person in costume plays an instrument in front of a sign.

[LABEL] entailment [PRED] entailment [COEFF] 7.2909

[P] A crowded boat is holding men, women, and children.

[H] A crowded boat is holding people.

[LABEL] entailment [PRED] entailment [COEFF] 7.2657

[P] A man stands next to tubas.

[H] A man stands near instruments.

[LABEL] entailment [PRED] entailment [COEFF] 6.9245

[P] A man talking a photo of a band with a drummer and a guitarist.

[H] A man is taking a photo of musicians.

[LABEL] contradiction [PRED] entailment [COEFF] 6.8502

[P] A quartet is performing inside.

[H] Musicians are playing inside.

[LABEL] entailment [PRED] entailment [COEFF] 6.7718

[P] Some africans are shopping at an open air market for green vegetables.

[H] Some africans are shopping for vegetables.

[LABEL] entailment [PRED] entailment [COEFF] 6.6486

[P] An older man wearing glasses, a baseball cap, a white shirt and a red vest plays a tuba outside a building.

[H] A man playing an instrument outside.

[LABEL] entailment [PRED] entailment [COEFF] 6.6448

[P] A man in a santa hat playing the xylophone.

[H] A man in the santa hat is playing a instrument.

[LABEL] entailment [PRED] entailment [COEFF] 6.3423

[P] Two dogs playing in a pool

[H] Two dogs playing in water.

[LABEL] entailment [PRED] entailment [COEFF] 6.1943

[P] A group of dogs racing.

[H] Dogs running.

[LABEL] entailment [PRED] entailment [COEFF] 6.1472

[P] Young women and men dressed in costumes sitting and standing.  
[H] People are dressed in costumes.

## 1.295 Component 294

[LABEL] **contradiction** [PRED] **contradiction** [COEFF] 10.8247

[P] People waiting at a bus stop in the city.

[H] People swimming in the beach

[LABEL] **contradiction** [PRED] **contradiction** [COEFF] 9.4253

[P] A radio hanging from the ceiling.

[H] A stuffed animal sitting on a desk.

[LABEL] **contradiction** [PRED] **contradiction** [COEFF] 8.3883

[P] Four men pose in front of a dry - docked boat ; three of them are sitting with a pair of drums.

[H] A cow tugging at field grass.

[LABEL] **contradiction** [PRED] **contradiction** [COEFF] 7.8634

[P] A woman skier in yellow and black races down the slope in front of the snow - covered trees.

[H] A child in the bathtub.

[LABEL] **contradiction** [PRED] **contradiction** [COEFF] 7.8042

[P] A bunch of military men marching.

[H] Guys swimming.

[LABEL] **contradiction** [PRED] **contradiction** [COEFF] 7.5701

[P] A small child dancing in front a orchestra band.

[H] Three people playing lacrosse.

[LABEL] **contradiction** [PRED] **contradiction** [COEFF] 7.5079

[P] Cheerleaders doing high kicks on a football field.

[H] Women fixing dinner.

[LABEL] **contradiction** [PRED] **contradiction** [COEFF] 7.5011

[P] Two black belt experts demonstrating karate moves.

[H] Two people singing

[LABEL] **contradiction** [PRED] **contradiction** [COEFF] 7.3052

[P] A runner running down the road.

[H] A person taking a nap under a tree

[LABEL] **contradiction** [PRED] **contradiction** [COEFF] 7.1468

[P] A man and a woman speaking into a microphone are on a stage.

[H] Two people riding horses.

[LABEL] **contradiction** [PRED] **contradiction** [COEFF] 7.1141

[P] The back side of a woman standing on a city sidewalk.

[H] A man playing with a pet

[LABEL] **contradiction** [PRED] **contradiction** [COEFF] 7.1061

[P] A woman is jumping really high while in the middle of a ruins ares, with beautiful mountaintops in the distance.

[H] A man juggling bottles.

[LABEL] **contradiction** [PRED] **contradiction** [COEFF] 7.0167

[P] A woman buys food from a street vendor in a city while others continue on their way.

[H] A man dancing naked.

[LABEL] **contradiction** [PRED] **contradiction** [COEFF] 6.9737

[P] A group of children on stage point off into the crowd while wearing boy scout and girl scout uniforms.

[H] Children swimming in a pool.

[LABEL] **contradiction** [PRED] **contradiction** [COEFF] 6.8702

[P] A girl wearing a purple patterned beanie is blowing soap bubbles in a garden.

[H] A boy playing in the sand

[LABEL] **contradiction** [PRED] **contradiction** [COEFF] 6.7996

[P] Band performing at a show.

[H] A comedian doing a stand - up routine.

## 1.296 Component 295

[LABEL] **contradiction** [PRED] **contradiction** [COEFF] 8.8624

[P] A man stands in front of a street vending booth with his hands crossed awkwardly in front of him while two yellow taxis are seen in the background of the cityscape.

[H] Nobody is standing.

[LABEL] **contradiction** [PRED] **contradiction** [COEFF] 8.8430

[P] A man and a woman perform a dance.

[H] The man and woman stand still.

[LABEL] **contradiction** [PRED] **contradiction** [COEFF] 8.6357

[P] A man walks a group of dalmatians on the beach.

[H] Nothing is walking.

[LABEL] **contradiction** [PRED] **contradiction** [COEFF] 8.5242

[P] A woman walking down a cobblestone path.

[H] Nobody is walking.

[LABEL] **contradiction** [PRED] **contradiction** [COEFF] 8.3750

[P] An older african american man wearing a red long - sleeve shirt, playing his saxophone on the street.

[H] Nobody is performing music.

[LABEL] contradiction [PRED] contradiction [COEFF] 8.3586

[P] A man in a white hat and white shirt with a black shoulder bag walking down a busy walkway

[H] Nobody is walking.

[LABEL] contradiction [PRED] contradiction [COEFF] 8.2902

[P] A small boy grins in a crowd full of people posing with their eyes closed in a sleeping position.

[H] Nobody is grinning.

[LABEL] contradiction [PRED] contradiction [COEFF] 7.7340

[P] A ballerina wearing a costume mouse head stands on her toes, with the city as the backdrop.

[H] Nobody is standing

[LABEL] contradiction [PRED] contradiction [COEFF] 7.5556

[P] A minneapolis police officer stands in front of a lingerie advertisement.

[H] Nobody is standing.

[LABEL] contradiction [PRED] contradiction [COEFF] 7.5513

[P] A brunette wearing a black tank top and camouflage shorts walking down the street in a major city near a metro subway station.

[H] Nobody is walking

[LABEL] contradiction [PRED] contradiction [COEFF] 7.2608

[P] A man in a red truck is staring out the driver - side window.

[H] Nobody is staring

[LABEL] contradiction [PRED] contradiction [COEFF] 7.2489

[P] A man in checkered pants black jacket and a checkered hat is holding a waiters tray.

[H] The person held nothing.

[LABEL] contradiction [PRED] contradiction [COEFF] 7.2457

[P] A man and a woman walking hand in hand past a sports poster.

[H] Nobody is walking

[LABEL] contradiction [PRED] contradiction [COEFF] 7.1605

[P] A person in a white hooded shirt is sitting in a chair near a body of water and there are buildings in the background.

[H] Nobody has a shirt.

[LABEL] contradiction [PRED] contradiction [COEFF] 7.0918

[P] A man in a plaid suit coat gestures with his hand.

[H] Nobody gestures

[LABEL] contradiction [PRED] contradiction [COEFF] 6.9748

[P] A group of students walk together.

[H] Nobody is walking

## 1.297 Component 296

[LABEL] **contradiction** [PRED] **contradiction** [COEFF] 18.1890

[P] Race car driver getting ready for the start of the race.

[H] A man is in a bowling alley.

[LABEL] **contradiction** [PRED] **contradiction** [COEFF] 14.8324

[P] Spectators watch as a stunt plane with colored smoke trails flies over the beach

[H] People are shopping at a mall.

[LABEL] **contradiction** [PRED] **contradiction** [COEFF] 14.1712

[P] A hockey goalie stops the puck.

[H] The person is playing tennis.

[LABEL] **contradiction** [PRED] **contradiction** [COEFF] 13.9455

[P] A dog with his front paws off the ground holds a white frisbee in his mouth in an rv campground.

[H] A girl is wearing a sun dress

[LABEL] **contradiction** [PRED] **contradiction** [COEFF] 13.1766

[P] A skier midair during what appears to be a daring flip on a sunny ski slope.

[H] A man driving a car.

[LABEL] **contradiction** [PRED] **contradiction** [COEFF] 12.0971

[P] Performing some bike maintenance, the lady lubricates a frame before assembly is completed.

[H] The lady is laying on the couch watching ellen.

[LABEL] **contradiction** [PRED] **contradiction** [COEFF] 11.9691

[P] A black dog jumping over a yellow pole in an obstacle course

[H] A cat is drinking milk.

[LABEL] **contradiction** [PRED] **contradiction** [COEFF] 11.5052

[P] Several soccer players are in a stadium playing soccer while a large audience watches them.

[H] They are at a ballet recital.

[LABEL] **contradiction** [PRED] **contradiction** [COEFF] 11.4144

[P] A skier with ski sticks is cutting into the snow as he makes a sharp turn.

[H] A person is watching tv.

[LABEL] **contradiction** [PRED] **contradiction** [COEFF] 11.3436

[P] A skateboarder jumps midair near a building.

[H] Santa clause eats a bowl of pa sta

[LABEL] **contradiction** [PRED] **contradiction** [COEFF] 11.0875

[P] A horse with a rider on top are jumping over a fence in a equestrian event.

[H] An airplane is flying over the rocky mountains.

[LABEL] **contradiction** [PRED] **contradiction** [COEFF] 11.0543

[P] A young skier receives a lesson in the snow from an adult.

[H] A man is watering his lawn.

[LABEL] **contradiction** [PRED] **contradiction** [COEFF] 10.8001

[P] Five crosscountry skiers making their way across snowy terrain.

[H] A woman sleeps on the beach in the sun.

[LABEL] **contradiction** [PRED] **contradiction** [COEFF] 10.1337

[P] A small child drilling on a board with a power drill.

[H] A child knitting a sweater.

[LABEL] **contradiction** [PRED] **contradiction** [COEFF] 10.0713

[P] Two boys wrestling in the sand while a man looks on

[H] Two sisters are shopping at the mall.

[LABEL] **contradiction** [PRED] **contradiction** [COEFF] 10.0501

[P] Two asian ladies posing for a picture.

[H] The people are laying in a bed sleeping.

## 1.298 Component 297

[LABEL] **entailment** [PRED] **entailment** [COEFF] 24.2004

[P] A boy with a black and white striped shirt is about to kick a pink soccer ball.

[H] A boy playing soccer

[LABEL] **entailment** [PRED] **entailment** [COEFF] 23.6928

[P] A boy in a sports uniform chasing a soccer ball

[H] A boy is playing soccer.

[LABEL] **entailment** [PRED] **entailment** [COEFF] 22.7956

[P] A boy heading a soccer ball towards the goal while the goalie waits to block it.

[H] A boy playing soccer.

[LABEL] **neutral** [PRED] **entailment** [COEFF] 21.1489

[P] A woman in blue shorts and a red and white striped shirt throws a soccer ball out onto a green field with players on it.

[H] The woman in blue shorts is playing soccer.

[LABEL] **entailment** [PRED] **entailment** [COEFF] 21.0936

[P] A young girl with long brown hair and dressed in black athletic wear is running towards a soccer ball.

[H] A young girl playing soccer.

[LABEL] **entailment** [PRED] **entailment** [COEFF] 20.7556

[P] A girl in a yellow tennis suit, green visor and white tennis shoes holding a tennis racket in a position where she is going to hit the tennis ball.

[H] A girl is playing tennis



[LABEL] **entailment**      [PRED] **entailment**      [COEFF] 19.7687  
[P] A female kicking a soccer ball while in front of a soccer goal.  
[H] The woman is playing soccer.

[LABEL] **entailment**      [PRED] **entailment**      [COEFF] 17.4286  
[P] A man wearing shorts and a white shirt is hitting a golf ball out of the sand - trap.  
[H] The man is playing golf.

[LABEL] **entailment**      [PRED] **entailment**      [COEFF] 17.3650  
[P] Two soccer players try their hardest to get to the ball.  
[H] Two people are playing a game of soccer.

[LABEL] **entailment**      [PRED] **entailment**      [COEFF] 17.0866  
[P] Three children wearing soccer uniforms chase after a blue and gray soccer ball.  
[H] Three kids are playing soccer

[LABEL] **entailment**      [PRED] **entailment**      [COEFF] 15.9765  
[P] A man in gray shorts and a white shirt hitting a golf ball out of a sand trap.  
[H] A man is playing golf.

[LABEL] **neutral**      [PRED] **entailment**      [COEFF] 15.8245  
[P] The woman is dressed in all white swinging a tennis racket.  
[H] A woman is playing tennis.

[LABEL] **neutral**      [PRED] **entailment**      [COEFF] 15.4610  
[P] A little girl kicking a soccer ball in a soccer stadium.  
[H] A little girl is practicing soccer.

[LABEL] **entailment**      [PRED] **entailment**      [COEFF] 15.3214  
[P] A man in an orange shirt hits a golf ball.  
[H] The man is playing golf.

[LABEL] **entailment**      [PRED] **entailment**      [COEFF] 14.7466  
[P] A tall, african american man is preparing to shoot a basketball on a court.  
[H] The man is playing basketball.

[LABEL] **entailment**      [PRED] **entailment**      [COEFF] 14.6481  
[P] Two soccer players are fighting over a ball.  
[H] The people are playing a game of soccer.

## 1.299 Component 298

[LABEL] **entailment**      [PRED] **entailment**      [COEFF] 20.1552  
[P] A young woman is talking on the phone while sitting on the steps.  
[H] A woman is talking.

[LABEL] entailment [PRED] entailment [COEFF] 19.7754

[P] A group of dressed - up people talking.

[H] A group of people are talking

[LABEL] entailment [PRED] entailment [COEFF] 19.5615

[P] A group of men are sitting at a table talking.

[H] A group of men are talking.

[LABEL] neutral [PRED] entailment [COEFF] 18.7782

[P] Two women talking with a smile smiling while sitting next to them.

[H] Two women are talking.

[LABEL] entailment [PRED] entailment [COEFF] 18.1609

[P] Two men carrying a briefcase talk to another man in a white t - shirt on a porch.

[H] Two men are talking.

[LABEL] entailment [PRED] entailment [COEFF] 17.8873

[P] Two men chat as one of them browses through a fruit and vegetable market stall.

[H] Two men are talking.

[LABEL] entailment [PRED] entailment [COEFF] 17.0403

[P] Two men are having a conversation at a meeting.

[H] Two men are talking.

[LABEL] entailment [PRED] entailment [COEFF] 16.9675

[P] Two women are communicating at a restaurant.

[H] Two women are talking.

[LABEL] entailment [PRED] entailment [COEFF] 16.9015

[P] A woman and a gray - bearded man lean on a curved railing, looking into the distance, while two women in the background have a conversation.

[H] Two women are talking.

[LABEL] entailment [PRED] entailment [COEFF] 16.6659

[P] A group of employees discussing something in a meeting.

[H] A group of employees are talking.

[LABEL] entailment [PRED] entailment [COEFF] 16.6340

[P] A group of people are talking in a workplace.

[H] A group of people are talking.

[LABEL] entailment [PRED] entailment [COEFF] 16.5935

[P] Two men in red shirts talking to each other.

[H] Two men talking

[LABEL] entailment [PRED] entailment [COEFF] 16.2779

[P] A lady talking on her cellphone.

[H] A lady is talking

[LABEL] entailment [PRED] entailment [COEFF] 16.1553

[P] Chinese men hanging out by a park and talking.

[H] The chinese men were talking.

[LABEL] entailment [PRED] entailment [COEFF] 15.9520

[P] Three women speak to each other in a room with tan walls.

[H] Three women are talking.

[LABEL] entailment [PRED] entailment [COEFF] 15.9325

[P] Two men wearing black shirt talking in a bar

[H] Two men are talking

### 1.300 Component 299

[LABEL] contradiction [PRED] contradiction [COEFF] 33.4459

[P] A man in a white shirt walking down the sidewalk.

[H] A man sits on a bench.

[LABEL] contradiction [PRED] contradiction [COEFF] 31.5657

[P] Men and women walking down a sidewalk.

[H] Men and women are sitting on the bench.

[LABEL] contradiction [PRED] contradiction [COEFF] 22.6790

[P] A man in a black shirt and jeans standing on the sidewalk looking at the camera.

[H] The man is sitting on a bench.

[LABEL] contradiction [PRED] contradiction [COEFF] 17.7840

[P] A bearded man in islamic garb walks down a city sidewalk.

[H] The male is sitting on a bench.

[LABEL] contradiction [PRED] contradiction [COEFF] 17.1392

[P] An older woman rides a bicycle across the street in front of a large green building.

[H] A woman is setting on a bench.

[LABEL] contradiction [PRED] contradiction [COEFF] 16.0718

[P] Two white dogs running and playing in a snow covered field.

[H] Two dogs are sitting on a bench.

[LABEL] contradiction [PRED] contradiction [COEFF] 14.8041

[P] A man sitting on a busy sidewalk.

[H] A man is sitting on a bench

[LABEL] contradiction [PRED] contradiction [COEFF] 14.3210

[P] Several people walking down a walkway.

[H] People sit lazily on benches.

[LABEL] **contradiction** [PRED] **contradiction** [COEFF] 13.8789

[P] There is a man in the middle of a crowd breakdancing in what looks to be a central square.

[H] The man is sitting on a bench.

[LABEL] **contradiction** [PRED] **contradiction** [COEFF] 13.3349

[P] A blond woman wearing a blue shirt is walking down the street while holding her cellphone.

[H] A woman is resting on a bench.

[LABEL] **contradiction** [PRED] **contradiction** [COEFF] 12.5283

[P] Crowd of people walking in the street

[H] And elderly couple is sitting on a bench in a park.

[LABEL] **contradiction** [PRED] **contradiction** [COEFF] 12.3989

[P] Pair of women holding umbrellas walking down a street in wet weather.

[H] The women are sitting on a bench sunbathing.

[LABEL] **contradiction** [PRED] **contradiction** [COEFF] 11.8917

[P] A man stands between two windows, one of which advertises " liquors " in front of an american flag.

[H] The man is sitting on the bench.

[LABEL] **contradiction** [PRED] **contradiction** [COEFF] 11.4060

[P] Boy in blue runs through public sprinklers.

[H] The boy is sitting on a park bench.

[LABEL] **contradiction** [PRED] **contradiction** [COEFF] 11.0071

[P] A group of six women are standing on a train platform.

[H] A group of six women sitting on a bench.

[LABEL] **contradiction** [PRED] **contradiction** [COEFF] 10.8350

[P] The lady in the short black skirt is walking with a lady in a short striped dress.

[H] Two women are sitting on a bench.

### 1.301 Component 300

[LABEL] **contradiction** [PRED] **contradiction** [COEFF] 7.7325

[P] A man in a black leather vest holding his belt as a crowd watches.

[H] The man is playing pool.

[LABEL] **neutral** [PRED] **contradiction** [COEFF] 7.5060

[P] A female ice skater doing a jump.

[H] A female trying to do a double sow cow.

[LABEL] **contradiction** [PRED] **contradiction** [COEFF] 6.7139

[P] Three young men take a jump shot with a tarp underneath them next to a stand of trees.

[H] Three men are playing tennis on the field.

[LABEL] **contradiction** [PRED] **contradiction** [COEFF] 6.6011

[P] Two individuals, one male and one unknown, playfully wrestle on a cement floor while five onlookers smile.

[H] Two individuals are wrestling on a grass lawn.

[LABEL] **neutral** [PRED] **contradiction** [COEFF] 6.3252

[P] A young boy swinging upside down from a bar.

[H] A child playing on a jungle gym.

[LABEL] **contradiction** [PRED] **contradiction** [COEFF] 6.1202

[P] Girl in colorful top and high heels dancing

[H] A girl doing yoga.

[LABEL] **contradiction** [PRED] **contradiction** [COEFF] 6.0239

[P] A girl on a skateboard is riding on a cement ledge next to a fence.

[H] She is eating an ice cream.

[LABEL] **contradiction** [PRED] **contradiction** [COEFF] 5.9709

[P] Two greyhounds with numbers run in a race on a track.

[H] Two poodles are running.

[LABEL] **contradiction** [PRED] **contradiction** [COEFF] 5.9300

[P] A man riding his bike with crowd in background.

[H] A man is sitting on a bench eating ice cream.

[LABEL] **neutral** [PRED] **contradiction** [COEFF] 5.9052

[P] Two men pulling a long rope.

[H] A pair of men pulling a tape measure.

[LABEL] **contradiction** [PRED] **contradiction** [COEFF] 5.8849

[P] A man carrying a large stack of metal poles over his shoulder.

[H] A man floating in the pool

[LABEL] **contradiction** [PRED] **contradiction** [COEFF] 5.8656

[P] Two young girls, in sparing gear, fight.

[H] Two young girls play house.

[LABEL] **contradiction** [PRED] **contradiction** [COEFF] 5.8269

[P] A woman, wearing a blue dress that reveals her abdomen, is holding a sledgehammer in the forest.

[H] A woman holding flowers at the wedding.

[LABEL] **contradiction** [PRED] **contradiction** [COEFF] 5.7185

[P] A woman with red - hair wearing blue, holding up blue pompoms and celebrating.

[H] The woman is holding a spatula.

[LABEL] **contradiction** [PRED] **contradiction** [COEFF] 5.6611

[P] A young lady is performing in some kind of martial arts.

[H] A lady playing basketball outdoors

[LABEL] **contradiction** [PRED] **contradiction** [COEFF] 5.6510

[P] A shirtless man with sunglasses and a helmet is riding a motorcycle next to traffic cones.

[H] A man driving a minivan.

### 1.302 Component 301

[LABEL] **contradiction** [PRED] **contradiction** [COEFF] 16.8073

[P] A man with green pants is flying through the air on a snowboard, with trees in the background.

[H] There is a man at the beach.

[LABEL] **contradiction** [PRED] **contradiction** [COEFF] 13.7235

[P] Two women wearing winter coats examine a wall with papers attached to it.

[H] Two women are at the beach.

[LABEL] **contradiction** [PRED] **contradiction** [COEFF] 12.9859

[P] A man holding a large chunk of snow over two people on the ground.

[H] The father and the two kids are playing on the beach.

[LABEL] **contradiction** [PRED] **contradiction** [COEFF] 12.0279

[P] A person wearing red is at the forefront of an underdeveloped city with man hanging cloths visible.

[H] The person is laying on the hot beach.

[LABEL] **contradiction** [PRED] **contradiction** [COEFF] 11.5977

[P] A man lighting a fire in what appears to be a wood cabin.

[H] The man is at the beach.

[LABEL] **contradiction** [PRED] **contradiction** [COEFF] 11.4015

[P] A child poses in the snow holding a partially formed piece of snow.

[H] A child enjoying a day at the beach.

[LABEL] **contradiction** [PRED] **contradiction** [COEFF] 10.6889

[P] A man in a yellow shirt guiding an ox which is pulling a cart through the forest.

[H] The man in the yellow shirt is standing on a beach.

[LABEL] **contradiction** [PRED] **contradiction** [COEFF] 10.6036

[P] Two men with their heads down on a restaurant table, seemingly in response to the man with the brown suede coat in front of them.

[H] Two men are at the beach talking to a woman.

[LABEL] **contradiction** [PRED] **contradiction** [COEFF] 9.9429

[P] A dog trying to catch a snowball in the snow.

[H] A dog plays in the water at the beach.

[LABEL] contradiction [PRED] contradiction [COEFF] 9.8808

[P] A man in a gray shirt is standing in a crowded street at night.

[H] The man is sunbathing at the beach.

[LABEL] contradiction [PRED] contradiction [COEFF] 9.3403

[P] A group of horses and people in front of a snowy mountain.

[H] A group of horses and people are at the beach

[LABEL] contradiction [PRED] contradiction [COEFF] 9.2076

[P] A black and a white dog on the snow.

[H] A dog sleeps on a sunny beach.

[LABEL] contradiction [PRED] contradiction [COEFF] 8.8383

[P] Two dogs play in the snow.

[H] Dogs playing at the beach

[LABEL] contradiction [PRED] contradiction [COEFF] 8.6410

[P] Two girls are balancing on top of a pole - like structure with an oil rig and houses in the background.

[H] Two girls are sitting on the beach.

[LABEL] contradiction [PRED] contradiction [COEFF] 8.1835

[P] The black and brown dog is running through the snow.

[H] The dog is on a beach.

[LABEL] contradiction [PRED] contradiction [COEFF] 7.5915

[P] Three people walking down a snowy path, wearing winter gear.

[H] People walking on the beach

### 1.303 Component 302

[LABEL] contradiction [PRED] contradiction [COEFF] 16.4659

[P] Person sleeping on the subway, while sitting beside someone.

[H] Everyone on the subway car is awake.

[LABEL] contradiction [PRED] contradiction [COEFF] 15.5227

[P] A rock band is playing in a dimly lit bar.

[H] The bar is brightly lit.

[LABEL] contradiction [PRED] contradiction [COEFF] 15.0621

[P] A black dog lying on its back in green grass.

[H] A dog is standing up.

[LABEL] contradiction [PRED] contradiction [COEFF] 12.4375

[P] A young boy is standing in muddy streets holding an umbrella.

[H] A boy walks on a clean sidewalk

[LABEL] **contradiction** [PRED] **contradiction** [COEFF] 12.1564  
[P] Two friends next to a closed shop door embrace.  
[H] The shop was open.

[LABEL] **contradiction** [PRED] **contradiction** [COEFF] 11.8024  
[P] Two children are shown upside down.  
[H] Two children are shown sitting upright

[LABEL] **contradiction** [PRED] **contradiction** [COEFF] 11.6195  
[P] A photo of a ride at an amusement park on an overcast day.  
[H] It is a sunny and hot day at the park.

[LABEL] **contradiction** [PRED] **contradiction** [COEFF] 11.1019  
[P] A photo of a ride at an amusement park on an overcast day.  
[H] A bright and sunny day for the grand opening of the new ride

[LABEL] **contradiction** [PRED] **contradiction** [COEFF] 11.0870  
[P] A fisherman fishes at the bank of a foggy river.  
[H] A fisherman stands by a clear river on a bright sunny day.

[LABEL] **contradiction** [PRED] **contradiction** [COEFF] 10.7271  
[P] A little boy in overalls crying.  
[H] The boy is happy.

[LABEL] **contradiction** [PRED] **contradiction** [COEFF] 10.4429  
[P] White car driving in an empty parking lot  
[H] The car is in a crowded lot

[LABEL] **contradiction** [PRED] **contradiction** [COEFF] 10.3669  
[P] An older woman holding a toddler up to stand and had a sad face.  
[H] The face is happy

[LABEL] **contradiction** [PRED] **contradiction** [COEFF] 10.2914  
[P] Naked man sitting on a green lawn next to a bike.  
[H] A fully clothed man riding a bike.

[LABEL] **contradiction** [PRED] **contradiction** [COEFF] 9.9164  
[P] Two people take a break from riding bicycles.  
[H] Two people are continuously riding bikes forever.

[LABEL] **contradiction** [PRED] **contradiction** [COEFF] 9.5573  
[P] A small, skinny, black child hanging on a piece of wood looking at a white woman.  
[H] The child is large

[LABEL] **contradiction** [PRED] **contradiction** [COEFF] 9.3770  
[P] The terminal is nearly empty, only a few people are there getting to their destination.



[H] The terminal is packed and busy.

### 1.304 Component 303

[LABEL] **contradiction** [PRED] **contradiction** [COEFF] 13.9680

[P] A woman is pulling a red cart with pumpkins in it down a dirt path.

[H] The women is at home.

[LABEL] **contradiction** [PRED] **contradiction** [COEFF] 13.2609

[P] An animal is hosed down by a brick wall.

[H] The animal is inside the house.

[LABEL] **contradiction** [PRED] **contradiction** [COEFF] 12.0636

[P] A bride in a wedding dress stands near a group of students in an outdoor setting.

[H] The bride is inside the church.

[LABEL] **contradiction** [PRED] **contradiction** [COEFF] 10.9286

[P] People are gathered at a platform on which stands a table of trophies with graduated boxes in front of the platform labeled 1, 2 and 3.

[H] People are sitting in an auditorium.

[LABEL] **entailment** [PRED] **contradiction** [COEFF] 10.7256

[P] A woman sits in a doorway holding fabric and an embroidery loom.

[H] A woman sits inside a house.

[LABEL] **contradiction** [PRED] **neutral** [COEFF] 10.2446

[P] A man sitting on an old piece of wood outside.

[H] A man is at home.

[LABEL] **entailment** [PRED] **contradiction** [COEFF] 9.8412

[P] A group of people are standing in a room filled with wooden furniture.

[H] The people are inside a building.

[LABEL] **entailment** [PRED] **contradiction** [COEFF] 9.2731

[P] A woman is writing in a lined notebook at a desk with a coffee mug.

[H] A woman is sitting indoors.

[LABEL] **contradiction** [PRED] **contradiction** [COEFF] 8.8517

[P] While seated on a chair, a man wearing a blue shirt, gray pants, multicolored bandanna, and no shoes is blowing through a long tube.

[H] A man is in his living room.

[LABEL] **contradiction** [PRED] **contradiction** [COEFF] 8.6996

[P] A girl stands in front of a wall covered in graffiti and several people play soccer.

[H] The girl is at home

[LABEL] **contradiction** [PRED] **contradiction** [COEFF] 8.6661

[P] An umpire makes a mark on a base on the field.

[H] The umpire is at home.

[LABEL] **contradiction** [PRED] **contradiction** [COEFF] 8.2526

[P] A woman is resting against a cross shaped pole while looking towards a large body of water.

[H] The woman is in a desert.

[LABEL] **contradiction** [PRED] **contradiction** [COEFF] 7.9853

[P] A man and a boy posing together behind a fence and a gorgeous waterfall view.

[H] The people are in a hotel.

[LABEL] **contradiction** [PRED] **contradiction** [COEFF] 7.8823

[P] Woman in trench coat and purple scarf stands under an awning that says " next to normal. "

[H] A woman stands on a city roof.

[LABEL] **contradiction** [PRED] **contradiction** [COEFF] 7.8763

[P] A group of people outside of a building.

[H] People are at home.

[LABEL] **contradiction** [PRED] **neutral** [COEFF] 7.8320

[P] A blond woman in a black jacket walks in front of a wall with wall art pushing a red cart.

[H] The woman is at home.

### 1.305 Component 304

[LABEL] **entailment** [PRED] **entailment** [COEFF] 12.5880

[P] A man wearing a short - sleeve shirt is crouched behind a yellow sunflower.

[H] Man hiding behind a sunflower

[LABEL] **entailment** [PRED] **entailment** [COEFF] 11.8320

[P] A girl in a white jacket is smiling while she holds a microphone.

[H] A female has a microphone in her hands.

[LABEL] **neutral** [PRED] **entailment** [COEFF] 11.7468

[P] Woman in blue pants walks past brick wall with graffiti.

[H] A woman wears blue jeans and walks.

[LABEL] **entailment** [PRED] **entailment** [COEFF] 11.7066

[P] A lone musician in black is on stage, playing an acoustic guitar and singing into a microphone.

[H] A lone musician is performing

[LABEL] **entailment** [PRED] **entailment** [COEFF] 11.5180

[P] A man in a striped shirt is demonstrating a product.

[H] The guy gives a presentation

[LABEL] **entailment** [PRED] **entailment** [COEFF] 10.9007

[P] A black and white dog is standing on the grass with its mouth wide open.

[H] A dog stands on grass

[LABEL] entailment [PRED] entailment [COEFF] 10.7151

[P] Three little boys play a tugging game

[H] Three children are playing.

[LABEL] entailment [PRED] entailment [COEFF] 10.5501

[P] Two women with hats are walking away from each other with their luggage.

[H] Two women with baggage to carry.

[LABEL] entailment [PRED] entailment [COEFF] 10.1333

[P] Two men lifting a basket together while other people watch them.

[H] The two men are being observed

[LABEL] entailment [PRED] entailment [COEFF] 10.0383

[P] A bicyclist is preparing to mount his bicycle in an urban setting.

[H] He is going to ride his bike.

[LABEL] entailment [PRED] entailment [COEFF] 9.8527

[P] A man dressed as something trying to entertain people.

[H] The entertainer is dressed up.

[LABEL] entailment [PRED] entailment [COEFF] 9.5215

[P] A man in a blue shirt is riding a bike along a road.

[H] A person is cycling outdoors.

[LABEL] entailment [PRED] entailment [COEFF] 9.1648

[P] A man in a gray sweater is eating a sandwich with meat.

[H] A man is eating food.

[LABEL] entailment [PRED] entailment [COEFF] 9.1277

[P] The men are wearing white suits to protect themselves.

[H] People dressed is protective suits.

[LABEL] entailment [PRED] entailment [COEFF] 9.1158

[P] A toy lego set is featured in the foreground while a woman and child play with it in the background.

[H] The lady and the child play with the lego set

[LABEL] entailment [PRED] entailment [COEFF] 9.0391

[P] A woman with sunglasses on sits and listens to music while smoking a cigarette.

[H] The lady listens to music.

### 1.306 Component 305

[LABEL] neutral [PRED] contradiction [COEFF] 20.2919

[P] A large brown dog is playing in the dirt and grass.

[H] A brown dog eats the grass.

[LABEL] **neutral** [PRED] **neutral** [COEFF] 17.8314

[P] A person walks on a snowy sidewalk, lit by street lamps, at night.

[H] The person is playing in the evening snow.

[LABEL] **contradiction** [PRED] **neutral** [COEFF] 17.5561

[P] A woman in a polka dotted jacket is asleep on a train full of people

[H] A woman talks with people on a train.

[LABEL] **neutral** [PRED] **neutral** [COEFF] 17.1293

[P] Two dogs, on standing on the other in the snow.

[H] Two dogs are experiencing snow for the first time.

[LABEL] **neutral** [PRED] **neutral** [COEFF] 16.5650

[P] An older man with graying hair talks on his cellular phone as he walks out of a jewelry store while a woman in a black coat with furry fringes stands outside.

[H] A man speaking on phone with his wife.

[LABEL] **neutral** [PRED] **neutral** [COEFF] 16.2982

[P] A man wearing a belt, a tan jacket and brown shoes is walking next to a woman with a brown purse, a black outfit, and sunglasses on a sidewalk.

[H] A man and his wife are walking.

[LABEL] **contradiction** [PRED] **neutral** [COEFF] 15.7676

[P] Man sitting by himself on a pier with a bottle of water.

[H] A man shares his water bottle with his friends on the pier.

[LABEL] **contradiction** [PRED] **contradiction** [COEFF] 15.4474

[P] A man with a green pack using his pole to point to snowcapped mountains.

[H] A man is eating a snow cone.

[LABEL] **contradiction** [PRED] **neutral** [COEFF] 15.3483

[P] A young boy is skating through a skating park.

[H] A young boy is sitting and watching skaters in the skate park.

[LABEL] **contradiction** [PRED] **contradiction** [COEFF] 14.7172

[P] A group of people holding up fabric flags and walking down the street.

[H] A group of people sleeping on the sidewalk.

[LABEL] **neutral** [PRED] **neutral** [COEFF] 14.6758

[P] A man with a black hat and black shirt is talking on a cellphone and drinking a beer outside.

[H] A man is enjoying his beer and talking to his girlfriend on the phone.

[LABEL] **neutral** [PRED] **neutral** [COEFF] 14.6619

[P] A man walking with a cane.

[H] A blind man guiding his way with his cane

[LABEL] **contradiction** [PRED] **contradiction** [COEFF] 14.5916

[P] A man in a red jacket is holding a piece of paper while posing.

[H] There is a man sleeping wearing a red jacket.

[LABEL] **contradiction** [PRED] **contradiction** [COEFF] 14.5697

[P] A woman in black dances with someone.

[H] A woman in black is sitting down watching people dance.

[LABEL] **contradiction** [PRED] **contradiction** [COEFF] 14.4206

[P] Three men wearing orange coats working on a street.

[H] A group of men with orange shirts are playing golf.

[LABEL] **contradiction** [PRED] **contradiction** [COEFF] 14.1794

[P] A man standing on top of some big rocks overlooking a sea on a secluded beach with his hand over his eyes trying to look far off at something.

[H] The man is sitting in a beach chair.

### 1.307 Component 306

[LABEL] **contradiction** [PRED] **contradiction** [COEFF] 28.6013

[P] Young man riding a bicycle in a race.

[H] A young man is sitting on his couch

[LABEL] **contradiction** [PRED] **contradiction** [COEFF] 23.2769

[P] A group of men are preparing to go for a bike ride or race.

[H] A group of men are sitting down in an office.

[LABEL] **contradiction** [PRED] **contradiction** [COEFF] 22.8437

[P] A man surfing a large wave in the ocean.

[H] The man is sitting in an ice hotel.

[LABEL] **contradiction** [PRED] **contradiction** [COEFF] 19.3028

[P] The dog runs in the deep snow.

[H] The dog is sitting on a couch.

[LABEL] **contradiction** [PRED] **contradiction** [COEFF] 18.7339

[P] A man climbing a pole with another person filming it.

[H] A man sits on a couch watching tv

[LABEL] **contradiction** [PRED] **contradiction** [COEFF] 18.3890

[P] A young man is performing gymnastics to impress a young woman.

[H] The man is lying in bed.

[LABEL] **contradiction** [PRED] **contradiction** [COEFF] 18.3566

[P] A man performing a trick on a bmx bike

[H] A man is sitting at his desk.

[LABEL] **contradiction** [PRED] **contradiction** [COEFF] 17.7613

[P] A man in a striped shirt is sharpening a tool on a grinding mill.

[H] A man is sitting on his couch

[LABEL] **contradiction** [PRED] **contradiction** [COEFF] 16.8716

[P] Black woman with bags hailing a cab.

[H] The woman is sitting at a bar.

[LABEL] **contradiction** [PRED] **contradiction** [COEFF] 16.8612

[P] The little girl splashes through the water.

[H] The girl is on her bed

[LABEL] **contradiction** [PRED] **contradiction** [COEFF] 16.7246

[P] A man in a cap and white shirt is cutting some fish on a boat that is floating on water next to a wooden dock.

[H] The man is sitting in the library on the college campus.

[LABEL] **contradiction** [PRED] **contradiction** [COEFF] 16.4649

[P] His eyes filled with joyous expectation, a skier prepares for a jump.

[H] A skier is sitting at the bar.

[LABEL] **contradiction** [PRED] **contradiction** [COEFF] 15.7755

[P] Two black dogs are running on pavement

[H] The pets are sitting on a couch

[LABEL] **contradiction** [PRED] **contradiction** [COEFF] 15.6799

[P] A young boy is kicking a soccer ball away from 3 opponents.

[H] The boy is seated in church.

[LABEL] **contradiction** [PRED] **contradiction** [COEFF] 15.4683

[P] A girl rides a unicycle as another rides a scooter next to her.

[H] The girls are sitting in the tree house.

[LABEL] **contradiction** [PRED] **contradiction** [COEFF] 14.9373

[P] A skilled surfer rides a very large wave ;

[H] The surfer is sitting in the sand.

### 1.308 Component 307

[LABEL] **contradiction** [PRED] **contradiction** [COEFF] 15.6617

[P] A man in a brown shirt standing behind a bar pouring a drink from a metal shaker.

[H] Nobody is standing.

[LABEL] **contradiction** [PRED] **contradiction** [COEFF] 15.5050  
[P] A group of six men stand in a circle playing instruments in a wooded parking lot.  
[H] Nobody is standing.

[LABEL] **contradiction** [PRED] **contradiction** [COEFF] 15.4435  
[P] Little girl stands in front of brick wall on cement block.  
[H] Nobody is standing.

[LABEL] **contradiction** [PRED] **contradiction** [COEFF] 14.0836  
[P] A bride stands next to a woman with a large basket of flowers.  
[H] Nobody is standing

[LABEL] **contradiction** [PRED] **contradiction** [COEFF] 13.3174  
[P] A minneapolis police officer stands in front of a lingerie advertisement.  
[H] Nobody is standing.

[LABEL] **contradiction** [PRED] **contradiction** [COEFF] 11.5491  
[P] A elderly woman in a blue and white polka dot dress standing near a bush.  
[H] Nobody is standing.

[LABEL] **contradiction** [PRED] **contradiction** [COEFF] 11.1593  
[P] A ballerina wearing a costume mouse head stands on her toes, with the city as the backdrop.  
[H] Nobody is standing

[LABEL] **contradiction** [PRED] **contradiction** [COEFF] 10.0912  
[P] A man stands in front of a street vending booth with his hands crossed awkwardly in front of him while two yellow taxis are seen in the background of the cityscape.  
[H] Nobody is standing.

[LABEL] **contradiction** [PRED] **contradiction** [COEFF] 9.8680  
[P] A woman in black is sitting at a table with her forehead in her left hand as she writes in a note pad next to a white coffee cup.  
[H] Nobody is sitting

[LABEL] **contradiction** [PRED] **contradiction** [COEFF] 9.4736  
[P] A male and a female sitting in a living room playing jenga.  
[H] Nobody is sitting.

[LABEL] **contradiction** [PRED] **contradiction** [COEFF] 9.3681  
[P] A man and a woman are standing next to sculptures, talking while another man looks at other sculptures.  
[H] Nobody is standing.

[LABEL] **contradiction** [PRED] **contradiction** [COEFF] 8.4501  
[P] A woman standing in the snow with people in the background.  
[H] Nobody is standing

[LABEL] **contradiction** [PRED] **contradiction** [COEFF] 7.8844

[P] A little girl is standing next to a snowman that is taller than her.

[H] Nobody is standing

[LABEL] **contradiction** [PRED] **contradiction** [COEFF] 6.9339

[P] A worker in a yellow jacket is hoisted up high to work on a building.

[H] Nobody is working

[LABEL] **contradiction** [PRED] **contradiction** [COEFF] 6.8345

[P] A baby dressed in pink, with a pacifier in her mouth is standing with one hand on a window.

[H] Nobody is standing

[LABEL] **contradiction** [PRED] **contradiction** [COEFF] 6.7723

[P] A bike rider sits and watches as a fellow rider does a jump off a ramp.

[H] Nobody is sitting.

### 1.309 Component 308

[LABEL] **entailment** [PRED] **entailment** [COEFF] 37.4472

[P] A dog surrounded by trees runs to catch a frisbee.

[H] An animal surrounded.

[LABEL] **entailment** [PRED] **entailment** [COEFF] 35.3893

[P] A dog tries to drink water from a sprinkler.

[H] An animal tries to drink water from a sprinkler.

[LABEL] **entailment** [PRED] **entailment** [COEFF] 33.4660

[P] A dog playing in the snow.

[H] An animal is playing in winter.

[LABEL] **entailment** [PRED] **entailment** [COEFF] 32.9840

[P] A bunch of dogs are competing in a race.

[H] A bunch of animals in a competition.

[LABEL] **entailment** [PRED] **entailment** [COEFF] 32.3725

[P] A dog wearing a green sweater and a backpack walking on snow.

[H] An animal is wearing clothing.

[LABEL] **entailment** [PRED] **entailment** [COEFF] 32.0176

[P] Two dogs play in the water.

[H] Animals are playing in water

[LABEL] **entailment** [PRED] **entailment** [COEFF] 24.1318

[P] Two dogs tied to a tree.

[H] Animals are bound to a tree.

[LABEL] **neutral** [PRED] **entailment** [COEFF] 21.7990



[P] A black dog pulls a red sled in the snow.

[H] An animal is pulling a sled in the snow.

[LABEL] **entailment** [PRED] **entailment** [COEFF] 20.3092

[P] A black dog is walking through a stream of water.

[H] An animal is walking through water.

[LABEL] **entailment** [PRED] **entailment** [COEFF] 19.3428

[P] A dog jumps and catches a frisbee in the grass.

[H] An animal catching a frisbee

[LABEL] **neutral** [PRED] **entailment** [COEFF] 18.0226

[P] The young children are petting a piglet

[H] Kids are petting an animal.

[LABEL] **entailment** [PRED] **entailment** [COEFF] 17.5229

[P] Two dogs play catch with a ball in a field.

[H] Animals playing outside.

[LABEL] **entailment** [PRED] **entailment** [COEFF] 16.3123

[P] A black dog and a brindle dog wrestle in the dry grass beside a body of water.

[H] Two mammals are wrestling with each other in the grass.

[LABEL] **entailment** [PRED] **entailment** [COEFF] 16.2719

[P] A little boy dressed in blue is petting a lamb.

[H] A boy is petting an animal

[LABEL] **entailment** [PRED] **entailment** [COEFF] 16.1450

[P] Lambs on a grassy hill.

[H] There are animals on a hill.

[LABEL] **entailment** [PRED] **entailment** [COEFF] 16.1427

[P] A group of dogs are playing together in snow.

[H] There are animals in the snow.

### 1.310 Component 309

[LABEL] **neutral** [PRED] **neutral** [COEFF] 41.9741

[P] A lady is taking a picture of something.

[H] The picture is beautiful.

[LABEL] **neutral** [PRED] **neutral** [COEFF] 37.9012

[P] A team of women are playing volleyball game in front of an crowd of people.

[H] The team is really good.

[LABEL] **neutral** [PRED] **neutral** [COEFF] 36.4559

[P] A middle - aged woman in a black dress stands facing a little girl who is holding a stuffed animal in blue hat.

[H] The little girl loves her stuffed animal.

[LABEL] **neutral** [PRED] **neutral** [COEFF] 36.3009

[P] The fashionably dressed young woman peers at an object in her hand.

[H] The woman liked the object a lot

[LABEL] **neutral** [PRED] **neutral** [COEFF] 35.7011

[P] An orchestra rehearses in a church.

[H] The orchestra is very talented.

[LABEL] **neutral** [PRED] **neutral** [COEFF] 35.3154

[P] A young man in a blue shirt wears headphones and operates a turntable.

[H] A young man wearing headphones really enjoys operating the turntable.

[LABEL] **neutral** [PRED] **neutral** [COEFF] 34.6425

[P] A female volleyball team during a game or practice.

[H] The volleyball team is good

[LABEL] **neutral** [PRED] **neutral** [COEFF] 33.6969

[P] A child touching a red plastic object, with a crowd behind him.

[H] The child is a fan favorite of the crowd.

[LABEL] **neutral** [PRED] **neutral** [COEFF] 33.6423

[P] Many of the dishes contain rice.

[H] The food is delicious

[LABEL] **neutral** [PRED] **neutral** [COEFF] 32.5981

[P] A small child plays with a batman toy car

[H] The toy car is the child's favorite toy.

[LABEL] **neutral** [PRED] **neutral** [COEFF] 32.5790

[P] Two employees working at a restaurant during dinnertime.

[H] The people love their jobs.

[LABEL] **neutral** [PRED] **neutral** [COEFF] 31.1046

[P] A man in a blue shirt is riding a bicycle down a long paved road.

[H] It is a nice bike

[LABEL] **neutral** [PRED] **neutral** [COEFF] 30.7245

[P] A woman posing in front of her painting.

[H] The woman is proud of her painting.

[LABEL] **entailment** [PRED] **neutral** [COEFF] 30.5804

[P] A man stands on stage with a fireworks going off beside of him.

[H] The fireworks are bright and noisy.

[LABEL] **neutral**            [PRED] **neutral**            [COEFF] 30.1388  
[P] A woman is sitting at a desk on her computer, and other people are behind her with laptops in front of them as well.  
[H] The woman works a very satisfying job.

[LABEL] **neutral**            [PRED] **neutral**            [COEFF] 29.4633  
[P] An older man is looking at a woman in a yellow shirt while they sit on benches in front of a stone and plaster wall.  
[H] The man thinks the woman is attractive

### 1.311 Component 310

[LABEL] **entailment**        [PRED] **neutral**            [COEFF] 143.6316  
[P] A man with orange shorts and a blue cap is in a tree.  
[H] The man is outdoors.

[LABEL] **entailment**        [PRED] **entailment**        [COEFF] 124.0767  
[P] Two men sitting on the steps and one man sleeping behind them.  
[H] Men are outdoors.

[LABEL] **entailment**        [PRED] **entailment**        [COEFF] 123.8709  
[P] A woman in a red shirt is walking with others along a road.  
[H] The woman is outdoors.

[LABEL] **entailment**        [PRED] **neutral**            [COEFF] 121.7955  
[P] Two people are under a blue umbrella while a woman riding a bike has a green umbrella.  
[H] The people are outdoors.

[LABEL] **entailment**        [PRED] **neutral**            [COEFF] 108.6020  
[P] A man in a white shirt pulls a line out of the water.  
[H] The man is outdoors.

[LABEL] **entailment**        [PRED] **neutral**            [COEFF] 107.5667  
[P] A boy wearing a blue shirt riding a gray horse on a gravel path through the green overgrown field.  
[H] The boy was outdoors

[LABEL] **entailment**        [PRED] **entailment**        [COEFF] 106.5582  
[P] A man is holding a blue fishing net in front of some rocks.  
[H] A man is outdoors.

[LABEL] **entailment**        [PRED] **entailment**        [COEFF] 105.5322  
[P] A young man in a red shirt cooking chicken on a grill in a public park, flashes the peace sign.  
[H] The man is outdoors.

[LABEL] **neutral**            [PRED] **neutral**            [COEFF] 101.5099  
[P] A woman in a yellow dress is walking passed a man in a blue shirt who is hunched over sitting on

a bench.

[H] The two people are outdoors.

[LABEL] **entailment** [PRED] **entailment** [COEFF] 99.3204

[P] Two men standing outside wearing jackets and caps.

[H] Two men are outdoors.

[LABEL] **entailment** [PRED] **entailment** [COEFF] 96.6822

[P] A woman dressed in a blue jacket and blue jeans rides a brown horse near a frozen lake and snow - covered mountain.

[H] The woman is outdoors.

[LABEL] **entailment** [PRED] **neutral** [COEFF] 90.2517

[P] A man wearing goggles snowboards on a half pipe.

[H] The man is outdoors.

[LABEL] **entailment** [PRED] **entailment** [COEFF] 89.3799

[P] A white dog lifts its paw as it stands on the grass near striped poles.

[H] The white dog is outdoors.

[LABEL] **entailment** [PRED] **neutral** [COEFF] 89.0311

[P] A group of people walking up a trail in a wooded area.

[H] The people are outdoors.

[LABEL] **entailment** [PRED] **neutral** [COEFF] 87.1447

[P] A man walking next to an extremely large tree trunk

[H] The man is outdoors.

[LABEL] **entailment** [PRED] **entailment** [COEFF] 86.9641

[P] Man in yellow playing guitar on a bench while a child watches.

[H] He is outdoors.

## 1.312 Component 311

[LABEL] **contradiction** [PRED] **contradiction** [COEFF] 7.4798

[P] People are walking down a narrow shop - filled asian alley.

[H] The people are sitting in a wide lobby

[LABEL] **contradiction** [PRED] **contradiction** [COEFF] 6.9556

[P] Three men at the beach drink beer and use a metal detector.

[H] The men are sitting on a train

[LABEL] **contradiction** [PRED] **contradiction** [COEFF] 6.9289

[P] Two old men wearing winter coat walking through woods.

[H] The men are walking through the desert.

[LABEL] contradiction [PRED] contradiction [COEFF] 6.6283  
[P] A man wearing a black shirt is holding a blond - hair baby.  
[H] The man is in a orange shirt.

[LABEL] contradiction [PRED] contradiction [COEFF] 6.5925  
[P] Lighthouse in a wooded area sits above tree's.  
[H] The lighthouse was in the middle of a barren desert.

[LABEL] contradiction [PRED] contradiction [COEFF] 6.2517  
[P] A fisherman sits in his boat repairing his net.  
[H] The fisherman is sitting in his car.

[LABEL] contradiction [PRED] contradiction [COEFF] 6.0999  
[P] A young man playing in a wave at the beach  
[H] The boy is sitting in the dunes of a desert

[LABEL] contradiction [PRED] contradiction [COEFF] 5.7081  
[P] At a bowling alley, a man in a black shirt is holding a bowling ball and looking down the lane.  
[H] The man is wearing a purple shirt.

[LABEL] contradiction [PRED] contradiction [COEFF] 5.5393  
[P] A man sits at a desk with four computer monitors.  
[H] A man is laying at the beach

[LABEL] contradiction [PRED] contradiction [COEFF] 5.4431  
[P] A blue - eyed woman with red - hair and glasses looks up at the camera while holding a hamburger with a bite out of it, as she sits on a boat with four other young people who are drinking and eating.  
[H] The woman is standing on a mountain top.

[LABEL] contradiction [PRED] contradiction [COEFF] 5.3529  
[P] A girl wearing a blue backpack is walking beside a blue plastic fence.  
[H] The girl is sitting by a black fence with a red backpack

[LABEL] contradiction [PRED] contradiction [COEFF] 5.3249  
[P] People using an outdoor ice skating rink.  
[H] The people are on a plane.

[LABEL] contradiction [PRED] contradiction [COEFF] 5.3059  
[P] A boy crawling through a cement pipeline  
[H] The boy was in the backyard flying a kite.

[LABEL] contradiction [PRED] contradiction [COEFF] 5.2597  
[P] A popular tobacco bar in the city.  
[H] The bar is in the desert.

[LABEL] contradiction [PRED] contradiction [COEFF] 5.2485  
[P] A group of people walking by a fence.

[H] The group of people are laying on the beach.

[LABEL] **contradiction** [PRED] **contradiction** [COEFF] 5.2330

[P] A man who just came from a swim.

[H] The man is in an airplane.

### 1.313 Component 312

[LABEL] **contradiction** [PRED] **contradiction** [COEFF] 44.3802

[P] A crowd of children in green t - shirts and people holding signs and purple balloons gathers next to a building.

[H] There is only one child present.

[LABEL] **contradiction** [PRED] **contradiction** [COEFF] 40.3354

[P] A group of people on their knees praying.

[H] There is only one person.

[LABEL] **contradiction** [PRED] **contradiction** [COEFF] 39.8885

[P] People shopping as well as a man in the background who appears to be a business owner of the fruit stand.

[H] There is only one person present.

[LABEL] **contradiction** [PRED] **contradiction** [COEFF] 39.6339

[P] A street musician in a red jacket and sweatpants plays guitar while pedestrians walk past.

[H] There is only one person present.

[LABEL] **contradiction** [PRED] **contradiction** [COEFF] 36.6341

[P] A group of people wearing helmets and riding on bikes.

[H] There is only one person riding a bike.

[LABEL] **contradiction** [PRED] **contradiction** [COEFF] 31.9614

[P] A group of people harvesting corn with a machine.

[H] Only one person is harvesting corn.

[LABEL] **contradiction** [PRED] **contradiction** [COEFF] 30.2563

[P] Two people in a crowd are looking up

[H] There is only one person their waiting

[LABEL] **contradiction** [PRED] **contradiction** [COEFF] 30.2120

[P] A girl in a yellow dress stands in front of orange pots as a crowd of people stands in the background.

[H] There is only one person present.

[LABEL] **contradiction** [PRED] **contradiction** [COEFF] 30.1131

[P] A young man is heading a ball while on the beach, another young man, in the background, looks at him.

[H] There is only one person on the beach.

[LABEL] **contradiction** [PRED] **contradiction** [COEFF] 26.4391

[P] After being thrown in the air a young man dressed in a blue t - shirt and black shorts is getting ready to be caught by other young men in the same type of t - shirt and black shorts in a gym with softball championship banners hanging high in the background.

[H] There is only one person present.

[LABEL] **contradiction** [PRED] **contradiction** [COEFF] 24.8156

[P] Two teams playing a soccer game inside a packed stadium.

[H] There is only one person present.

[LABEL] **contradiction** [PRED] **contradiction** [COEFF] 24.6356

[P] A multicultural group of friends sitting down in an outdoor floor and hanging out to together during a cold busy night.

[H] Only one individual is sitting outside at night.

[LABEL] **contradiction** [PRED] **contradiction** [COEFF] 23.4080

[P] Two brown dogs wrestle on the grassy hill.

[H] There is only one dog on the hill,

[LABEL] **contradiction** [PRED] **contradiction** [COEFF] 22.2702

[P] Two people are standing near a curb outside a store.

[H] There is only one person.

[LABEL] **contradiction** [PRED] **contradiction** [COEFF] 21.8622

[P] A group of people standing on the steps of a church as the bridal party, dressed in blue exits the church.

[H] There is only one person standing at the steps.

[LABEL] **entailment** [PRED] **contradiction** [COEFF] 21.7977

[P] There are five people in the picture, two guys talking near a sign for free advice, a man and women facing away and another man on a phone in the background.

[H] There is only one woman in the picture.

### 1.314 Component 313

[LABEL] **entailment** [PRED] **entailment** [COEFF] 7.3782

[P] This woman is having some sort of dental procedure done.

[H] A woman has a dental procedure performed.

[LABEL] **entailment** [PRED] **entailment** [COEFF] 7.2189

[P] A woman admiring colorful christmas ornaments.

[H] A woman looking at christmas ornaments.

[LABEL] **entailment** [PRED] **entailment** [COEFF] 6.8688

[P] Children are playing with baseball bats.

[H] Kids are playing with baseball bats.

[LABEL] entailment [PRED] entailment [COEFF] 6.7351  
[P] A victory parade is being celebrated.  
[H] A parade is celebrating a victory.

[LABEL] entailment [PRED] entailment [COEFF] 6.7196  
[P] Kids are dressed in costume and playing a game.  
[H] Children in costumes are playing a game.

[LABEL] entailment [PRED] entailment [COEFF] 6.7149  
[P] A group of people are performing on stage.  
[H] People are performing on stage.

[LABEL] entailment [PRED] entailment [COEFF] 6.6731  
[P] A man in a leather jacket and leather boots.  
[H] A man is wearing a leather jacket and boots.

[LABEL] entailment [PRED] entailment [COEFF] 6.5043  
[P] A man with a radio trims a bush outdoors.  
[H] A man has a radio.

[LABEL] entailment [PRED] entailment [COEFF] 6.4626  
[P] People are holding a vigil.  
[H] A vigil was being held by the people.

[LABEL] entailment [PRED] entailment [COEFF] 6.3434  
[P] A man in a jumpsuit and a headband is docking a boat.  
[H] A man is wearing a jumpsuit.

[LABEL] entailment [PRED] entailment [COEFF] 6.3321  
[P] A woman in a red shirt is raising her arm to the crowd below.  
[H] A woman is wearing a red shirt.

[LABEL] entailment [PRED] entailment [COEFF] 6.1967  
[P] A man in a black helmet riding his bike on a trail.  
[H] A man is riding a bike with a helmet.

[LABEL] entailment [PRED] entailment [COEFF] 6.1771  
[P] A football player wearing a sooners uniform with the number 42.  
[H] A football player has the number 42.

[LABEL] entailment [PRED] entailment [COEFF] 6.0942  
[P] A man with red, white and black face paint.  
[H] A person with face paint.

[LABEL] entailment [PRED] entailment [COEFF] 6.0355  
[P] A man in a red jacket rides a horse in mountainous terrain.  
[H] A man has a red jacket.



[LABEL] entailment [PRED] entailment [COEFF] 5.9768  
[P] A hallway is littered with ladders and fabric during construction.  
[H] A hallway full of ladders and fabric during construction.

### 1.315 Component 314

[LABEL] contradiction [PRED] contradiction [COEFF] 12.4638  
[P] A group of snowmobile riders gather in the snow.  
[H] People in shorts are playing tennis.

[LABEL] contradiction [PRED] contradiction [COEFF] 10.6869  
[P] A busy downtown new york city with a taxi in the foreground.  
[H] Kittens are playing in a field.

[LABEL] contradiction [PRED] contradiction [COEFF] 9.9147  
[P] A young student receives fencing instruction from his kneeling teacher while a potential opponent and a woman gaze behind them.  
[H] Two people are playing basketball.

[LABEL] contradiction [PRED] contradiction [COEFF] 9.4045  
[P] A small child dancing in front a orchestra band.  
[H] Three people playing lacrosse.

[LABEL] contradiction [PRED] contradiction [COEFF] 9.3672  
[P] A closeup of gray and white shoes on the shore near the beach water.  
[H] The blue angels are a chess team.

[LABEL] contradiction [PRED] contradiction [COEFF] 8.7907  
[P] A bulldozer is working on a building.  
[H] There is a parrot in a cage.

[LABEL] contradiction [PRED] contradiction [COEFF] 8.1853  
[P] People playing bagpipes in a kitchen.  
[H] People are running a marathon

[LABEL] contradiction [PRED] contradiction [COEFF] 8.0820  
[P] Three workers in bright green vests, taking a break.  
[H] Dog swims in lake

[LABEL] contradiction [PRED] contradiction [COEFF] 8.0141  
[P] Four people waiting at a train station on a sunny day.  
[H] People playing frisbee golf in the park.

[LABEL] contradiction [PRED] contradiction [COEFF] 7.9949  
[P] A man with a canned drink is standing under a waterfall.  
[H] A child is playing in a kiddy pool.

[LABEL] **contradiction** [PRED] **contradiction** [COEFF] 7.8118  
 [P] Four guys with backpacks walk along a trail next to a large mountain.  
 [H] Girls are swimming in the lake.

[LABEL] **contradiction** [PRED] **contradiction** [COEFF] 7.7206  
 [P] Two children and a man on a boulder.  
 [H] A dog sits by the lake.

[LABEL] **contradiction** [PRED] **contradiction** [COEFF] 7.4198  
 [P] People are walking through a snow covered field with a mountain the background.  
 [H] The group of hikers are walking along the beach.

[LABEL] **contradiction** [PRED] **contradiction** [COEFF] 7.3987  
 [P] A hiker in a red on a snowy peak.  
 [H] Biker riding down the street.

[LABEL] **contradiction** [PRED] **contradiction** [COEFF] 7.2431  
 [P] A few people are riding elephants through a river.  
 [H] A man is grilling a hamburger.

[LABEL] **contradiction** [PRED] **contradiction** [COEFF] 7.1282  
 [P] A man gathers kite string on the beach.  
 [H] A woman is flying three kites at a park.

### 1.316 Component 315

[LABEL] **entailment** [PRED] **entailment** [COEFF] 8.2383  
 [P] A young girl walks beside a stream.  
 [H] A girl walks beside the water

[LABEL] **entailment** [PRED] **entailment** [COEFF] 7.6739  
 [P] A little girl in a yellow dress walking by the water.  
 [H] A girl is walking by the water.

[LABEL] **neutral** [PRED] **entailment** [COEFF] 7.1547  
 [P] A girl wearing a gray shirt and a headband smiles as she holds a brown pottery.  
 [H] A girl smiles

[LABEL] **entailment** [PRED] **entailment** [COEFF] 6.6926  
 [P] A young child with blond - hair, wearing a blue shirt and jeans is walking in the woods.  
 [H] A young child walks through the woods.

[LABEL] **entailment** [PRED] **entailment** [COEFF] 6.5004  
 [P] Two brown dogs are wearing muzzles and running very fast through the grass.  
 [H] Two dogs are running through the field.

[LABEL] entailment [PRED] entailment [COEFF] 6.2161

[P] A pretty young adult woman, wearing gray leggings and a bright orange tank top, is sitting on a cement bench with bicycles in the background.

[H] A young woman is sitting on a cement bench.

[LABEL] entailment [PRED] entailment [COEFF] 6.0260

[P] A woman in a pink top and blue pants sits in an oak tree.

[H] A woman sit next to an oak tree.

[LABEL] entailment [PRED] entailment [COEFF] 6.0209

[P] A man sleeps on the porch of a dilapidated yellow building.

[H] A man is sleeping outside.

[LABEL] entailment [PRED] entailment [COEFF] 5.9591

[P] A woman in a pink shirt and khaki shorts looks over a crumbling rock face overlooking a large forested area.

[H] A woman is looking over a rock

[LABEL] entailment [PRED] entailment [COEFF] 5.6366

[P] A blond street worker wearing a white hard hat, orange shirt, jeans and a reflective jacket in front of a white truck and orange pylons.

[H] A blond street worker stands in front of a truck.

[LABEL] entailment [PRED] entailment [COEFF] 5.5992

[P] A blond woman wearing a gray jacket converses with an older man in a green shirt and glasses while sitting on a restaurant patio.

[H] A blond woman chats with an older gentleman while they sit together at the patio of a diner.

[LABEL] entailment [PRED] entailment [COEFF] 5.5895

[P] A woman with a taupe colored shirt looking down.

[H] A woman looks downward.

[LABEL] entailment [PRED] entailment [COEFF] 5.5575

[P] A child, arms outstretched, has just jumped outwards out of blueish green ocean water.

[H] A child jumps

[LABEL] entailment [PRED] entailment [COEFF] 5.5316

[P] A black dog jumps in a body of water with a stick in his mouth.

[H] A dog jumps into the water.

[LABEL] entailment [PRED] entailment [COEFF] 5.5152

[P] A little girl slides down a green slide with her arms up at a playground.

[H] A girl is playing outdoor.

[LABEL] entailment [PRED] entailment [COEFF] 5.4328

[P] A dog is running through a very wooded area with large white flowers.

[H] A dog is running through the woods.

### 1.317 Component 316

[LABEL] **contradiction** [PRED] **contradiction** [COEFF] 15.9731

[P] Two men dressed in winter coats are standing outside in the snow in a picnic shelter, getting ready to eat.

[H] Two women cook dinner in winter

[LABEL] **contradiction** [PRED] **contradiction** [COEFF] 15.7420

[P] A man in a t - shirt pulling the tail of a statued lion while another man sits with his hand on his chin.

[H] Two woman pose on the museum steps and take a selfie.

[LABEL] **contradiction** [PRED] **contradiction** [COEFF] 15.3910

[P] Three men in camouflage clothing and another man in a hat and red shirt and blue shorts standing in front of a building.

[H] Three women in camo clothing stand in front of a building getting ready to rob it.

[LABEL] **neutral** [PRED] **contradiction** [COEFF] 14.8902

[P] Two smiling men, one wearing a red jacket and the other wearing a navy blue jacket, are standing in the snow preparing to ski.

[H] The woman are enjoying their vacation to aspen with some skiing on the fresh morning powder.

[LABEL] **contradiction** [PRED] **contradiction** [COEFF] 14.7844

[P] A little boy with yellow swim goggles, in blue stripe topped shirt and blue pajama pants caught in midair at home.

[H] The young girl gets ready to go out with her friends.

[LABEL] **contradiction** [PRED] **contradiction** [COEFF] 14.5515

[P] A young boy in velcro shoes and a blue sweatshirt hangs in a harness at a pier.

[H] A young woman is playing carnival games at the pier.

[LABEL] **contradiction** [PRED] **contradiction** [COEFF] 13.4300

[P] A man stands in front of a stack of paperwork and you can see it the reflection form the window

[H] Two women type on very old computers in a crowded library.

[LABEL] **contradiction** [PRED] **contradiction** [COEFF] 12.3793

[P] A shirtless older man making a traditional indian street food dish.

[H] The elderly woman is making drinks for people at a street corner.

[LABEL] **contradiction** [PRED] **contradiction** [COEFF] 12.3241

[P] Man in black with a feathered hat sits atop a horse.

[H] A woman wearing white watches a horse competition.

[LABEL] **contradiction** [PRED] **contradiction** [COEFF] 11.4849

[P] Man in sports jacket and jeans sews a net.

[H] A woman wearing a red hat sews a shirt

[LABEL] contradiction [PRED] contradiction [COEFF] 11.4317

[P] Two men, one wearing a white vest, and the other wearing a blue polo shirt, practicing martial arts in a park.

[H] There is a girl doing karate

[LABEL] contradiction [PRED] contradiction [COEFF] 11.4195

[P] A teenage boy has a silver ring protruding from his nose.

[H] A teenage girl getting a tattoo.

[LABEL] contradiction [PRED] contradiction [COEFF] 11.1704

[P] A blond boy wipes his nose on his light blue shirt.

[H] A girl is wiping her eye that is watering.

[LABEL] contradiction [PRED] contradiction [COEFF] 11.0839

[P] A boy falls off his red bike.

[H] A girl performs tricks on her bike

[LABEL] contradiction [PRED] contradiction [COEFF] 11.0498

[P] A man is sitting in front of a computer monitor holding a keyboard and looking at the camera.

[H] A young woman talks to her family through the computer

[LABEL] contradiction [PRED] contradiction [COEFF] 11.0337

[P] A young man is standing wearing a black jacket and pink shirt with a cigarette in his mouth.

[H] A girl in a pink shirt and black jacket is caught smoking by her brother's camera.

### 1.318 Component 317

[LABEL] contradiction [PRED] contradiction [COEFF] 26.2387

[P] Two woman stand on a street corner and talk to a third person

[H] The women are preparing dinner.

[LABEL] contradiction [PRED] contradiction [COEFF] 24.2388

[P] A man standing in front of several cliff faces.

[H] The man is cooking dinner

[LABEL] contradiction [PRED] contradiction [COEFF] 22.9521

[P] Two men stand on scaffolding against a red brick building.

[H] Two men have coffee and donuts at a diner.

[LABEL] contradiction [PRED] contradiction [COEFF] 20.9385

[P] Three people are crossing a street in new york city.

[H] Three people eat at a hot dog stand.

[LABEL] contradiction [PRED] contradiction [COEFF] 19.9369

[P] Two people in stilts wearing fur walking down the road

[H] The people were making breakfast.

[LABEL] **contradiction** [PRED] **neutral** [COEFF] 18.7374  
[P] People are standing in a building that's under construction near 3rd st.  
[H] A woman is baking cookies.

[LABEL] **contradiction** [PRED] **neutral** [COEFF] 18.5233  
[P] Five men at differing heights on scaffolding next to a building.  
[H] Five men go to lunch.

[LABEL] **contradiction** [PRED] **contradiction** [COEFF] 18.3316  
[P] Firemen in uniform standing on a wet street looking up at a building.  
[H] Firemen are sitting down for lunch

[LABEL] **contradiction** [PRED] **neutral** [COEFF] 18.2653  
[P] A woman standing on the side of a very inclined road.  
[H] A woman is taking a nap.

[LABEL] **contradiction** [PRED] **contradiction** [COEFF] 18.1119  
[P] Lady walking past a man on a bench who is watching her.  
[H] A man is baking cookies.

[LABEL] **contradiction** [PRED] **contradiction** [COEFF] 16.6637  
[P] People standing near a large metalized object reflecting a city skyline.  
[H] People are watching a farmer.

[LABEL] **contradiction** [PRED] **neutral** [COEFF] 16.1668  
[P] A man in a tie standing outside.  
[H] The man in the tie was eating breakfast at a coffee shop

[LABEL] **contradiction** [PRED] **contradiction** [COEFF] 16.0605  
[P] Students in matching uniforms in a city stand in groups.  
[H] Students are playing kickball.

[LABEL] **contradiction** [PRED] **contradiction** [COEFF] 16.0221  
[P] Three women, all doing something different, are sitting on a bench.  
[H] Three women are cooking dinner.

[LABEL] **contradiction** [PRED] **contradiction** [COEFF] 15.1695  
[P] A person walks in the valley between tall mountains.  
[H] A person is cooking dinner.

[LABEL] **contradiction** [PRED] **contradiction** [COEFF] 14.9606  
[P] A group of women sit on a sidewalk corner, and relax from their journey.  
[H] The women are cooking.

### 1.319 Component 318

[LABEL] **entailment** [PRED] **entailment** [COEFF] 15.8414

[P] A child plays in a fountain.

[H] A child is playing.

[LABEL] **entailment** [PRED] **entailment** [COEFF] 14.3625

[P] A baby playing in the dirt with a bucket and shovel.

[H] A baby is playing.

[LABEL] **entailment** [PRED] **entailment** [COEFF] 13.8454

[P] Three children playing in large bubble balls inside a pool.

[H] Three children are playing.

[LABEL] **neutral** [PRED] **entailment** [COEFF] 13.6716

[P] A young child with a helmet on playing with a tonka truck.

[H] A child is playing.

[LABEL] **entailment** [PRED] **entailment** [COEFF] 13.2174

[P] Two children play in the melting slush.

[H] Two children are playing.

[LABEL] **entailment** [PRED] **entailment** [COEFF] 13.1973

[P] A little girl plays with a ribbon.

[H] A little girl is playing.

[LABEL] **neutral** [PRED] **entailment** [COEFF] 12.3257

[P] A black and tan dog plays with a stuffed toy.

[H] A black and tan dog is playing

[LABEL] **entailment** [PRED] **entailment** [COEFF] 12.2515

[P] Three dogs play with each other out in the field.

[H] Three dogs are playing.

[LABEL] **entailment** [PRED] **entailment** [COEFF] 11.7594

[P] Small girl plays on top of a black iron machine.

[H] A girl is playing.

[LABEL] **entailment** [PRED] **entailment** [COEFF] 11.6777

[P] Two children wearing giants clothing are playing with laundry.

[H] The children are playing.

[LABEL] **entailment** [PRED] **entailment** [COEFF] 11.3109

[P] Young girl playing with streamers.

[H] A girl playing.

[LABEL] **entailment** [PRED] **entailment** [COEFF] 11.2330

[P] A little boy is playing in some water at a waterpark.

[H] A little boy is playing

[LABEL] *entailment* [PRED] *entailment* [COEFF] 11.1384

[P] A baby playing in a toy

[H] A baby is playing

[LABEL] *entailment* [PRED] *entailment* [COEFF] 11.0032

[P] Children play in a water sculpture on the sidewalk.

[H] Kids playing.

[LABEL] *entailment* [PRED] *entailment* [COEFF] 10.7941

[P] A little boy in a yellow jersey playing in a playgym.

[H] A child is playing.

[LABEL] *entailment* [PRED] *entailment* [COEFF] 10.7732

[P] A young girl plays in a fountain on a sunny day.

[H] A girl plays.

### 1.320 Component 319

[LABEL] *entailment* [PRED] *entailment* [COEFF] 15.5821

[P] A person dressed in red and gray is skiing down a snowy slope.

[H] A person is skiing.

[LABEL] *entailment* [PRED] *entailment* [COEFF] 14.4033

[P] A person is climbing a rock - climbing wall.

[H] The person is climbing.

[LABEL] *entailment* [PRED] *entailment* [COEFF] 12.3423

[P] A person in red and black is skiing.

[H] Someone is skiing.

[LABEL] *entailment* [PRED] *entailment* [COEFF] 11.8515

[P] Several people are camping out on blankets along a yellow - fenced in area.

[H] People are camping.

[LABEL] *entailment* [PRED] *entailment* [COEFF] 11.6518

[P] People dressed in green uniforms are picking up some metal.

[H] People are picking up metal.

[LABEL] *entailment* [PRED] *entailment* [COEFF] 11.4598

[P] A man wearing a backpack is climbing a rock.

[H] The man is climbing.

[LABEL] *entailment* [PRED] *entailment* [COEFF] 10.8200



[P] A man in a blue shirt is stretching.

[H] A man is stretching.

[LABEL] **entailment** [PRED] **entailment** [COEFF] 10.4061

[P] Dancers perform in colorful outfits.

[H] Dancers perform.

[LABEL] **entailment** [PRED] **entailment** [COEFF] 9.9690

[P] Two brown dogs are running through a grassy area.

[H] Dogs are running.

[LABEL] **entailment** [PRED] **entailment** [COEFF] 9.9085

[P] People are eating with an american flag in the back.

[H] The people are eating.

[LABEL] **entailment** [PRED] **entailment** [COEFF] 9.9007

[P] A person is abseiling down a rock face attached to a rope.

[H] A person is abseiling.

[LABEL] **entailment** [PRED] **entailment** [COEFF] 9.8786

[P] A woman in a white dress is singing

[H] A woman is singing.

[LABEL] **entailment** [PRED] **entailment** [COEFF] 9.8573

[P] Two people are fighting in full protective gear and helmets.

[H] The people are fighting.

[LABEL] **entailment** [PRED] **entailment** [COEFF] 9.6708

[P] People are racing down a road on skateboards.

[H] The people are racing.

[LABEL] **entailment** [PRED] **entailment** [COEFF] 9.6235

[P] A young boy is playing baseball.

[H] The boy is playing baseball.

[LABEL] **entailment** [PRED] **entailment** [COEFF] 9.2446

[P] People are holding signs and marching.

[H] People are holding signs.

### 1.321 Component 320

[LABEL] **contradiction** [PRED] **contradiction** [COEFF] 22.1278

[P] Two women are shopping for glassware outside a store.

[H] Two men are shopping for glassware outside a store.

[LABEL] **contradiction** [PRED] **contradiction** [COEFF] 21.0656

[P] Three women hold hands and walk in the ocean.  
[H] Men hold hands and walk in the ocean

[LABEL] **contradiction** [PRED] **contradiction** [COEFF] 18.1506  
[P] Three girls help lay a roof on a newly constructed building.  
[H] Three boys help lay a roof on a newly constructed building.

[LABEL] **contradiction** [PRED] **contradiction** [COEFF] 17.0917  
[P] Two women are talking behind a bar.  
[H] Two men are talking behind a bar.

[LABEL] **contradiction** [PRED] **contradiction** [COEFF] 16.9316  
[P] Women in costumes on a street.  
[H] Men in costumes on a street.

[LABEL] **contradiction** [PRED] **contradiction** [COEFF] 16.0701  
[P] Two girls share a laugh together.  
[H] Two boys share a laugh together.

[LABEL] **contradiction** [PRED] **contradiction** [COEFF] 15.7027  
[P] Two women are wearing aprons and baking attire and cooking something in a kitchen.  
[H] The men are cooking.

[LABEL] **contradiction** [PRED] **contradiction** [COEFF] 14.8802  
[P] Girls play jump rope in a crowded place.  
[H] The boys were playing jump rope.

[LABEL] **contradiction** [PRED] **contradiction** [COEFF] 13.8908  
[P] Two ladies are standing on the sidewalk.  
[H] Two men are standing on the sidewalk.

[LABEL] **contradiction** [PRED] **contradiction** [COEFF] 13.5162  
[P] Two girls are riding camels while another girl looks at them.  
[H] There are boys riding the camels.

[LABEL] **contradiction** [PRED] **contradiction** [COEFF] 12.7847  
[P] Girls with baseball gloves walking across a baseball field  
[H] The men walk across the field.

[LABEL] **contradiction** [PRED] **contradiction** [COEFF] 11.6891  
[P] Two young women clap their hands in laughter.  
[H] Two men clap their hands.

[LABEL] **contradiction** [PRED] **contradiction** [COEFF] 10.4440  
[P] Two elderly women enjoying sandwiches on a bench.  
[H] Two elderly men enjoying sandwiches on a bench.

[LABEL] **contradiction** [PRED] **contradiction** [COEFF] 10.1305  
[P] Two young ladies review the pictures taken in their digital camera.  
[H] Two boys are reviewing pictures.

[LABEL] **contradiction** [PRED] **contradiction** [COEFF] 9.8914  
[P] Two women in diaphanous pink skirts dancing.  
[H] The men are dancing.

[LABEL] **contradiction** [PRED] **contradiction** [COEFF] 9.2221  
[P] Two girls are practicing yoga in a park.  
[H] Men are doing yoga indoors.

### 1.322 Component 321

[LABEL] **neutral** [PRED] **neutral** [COEFF] 27.8251  
[P] A little girl is a pool enjoying herself on a float  
[H] A funny person enjoying herslef.

[LABEL] **neutral** [PRED] **neutral** [COEFF] 26.7841  
[P] A girl in a frilly pink dress, dancing on grass.  
[H] A girl is dressed up in her best clothes.

[LABEL] **neutral** [PRED] **neutral** [COEFF] 25.3102  
[P] A guy plays guitar and sings in his band.  
[H] A man plays and sings rock and roll.

[LABEL] **neutral** [PRED] **neutral** [COEFF] 24.6726  
[P] A girl in a swimsuit stands in the spray of water, a bicycle in the background.  
[H] A funny person standing.

[LABEL] **neutral** [PRED] **neutral** [COEFF] 24.2144  
[P] An african american man holds his soda.  
[H] A man outside is holding a drink in warm weather

[LABEL] **neutral** [PRED] **neutral** [COEFF] 24.0319  
[P] A man sitting with his daughter in his daughter's pink car in a grocery store.  
[H] A little girl with pigtails is smiling at her father.

[LABEL] **neutral** [PRED] **neutral** [COEFF] 23.7090  
[P] A fuzzy white lap dog runs along a rocky beach.  
[H] A dog chases birds on the beach.

[LABEL] **entailment** [PRED] **neutral** [COEFF] 23.4520  
[P] A man in a sleek white shirt gazes into the woman's eyes while holding on to the back of her black and pink dress.  
[H] A man looks lovingly at the girl he's holding.

[LABEL] **neutral** [PRED] **neutral** [COEFF] 23.1989

[P] Crowd watching a baseball game.

[H] The crowd is cheering.

[LABEL] **neutral** [PRED] **neutral** [COEFF] 22.7325

[P] The woman is wearing a purple shirt and runs on the beach.

[H] A woman is jogging along the beach for exercise.

[LABEL] **neutral** [PRED] **neutral** [COEFF] 22.5042

[P] The football player is running with a football trying to score.

[H] The player is running toward the goal line.

[LABEL] **entailment** [PRED] **neutral** [COEFF] 22.3741

[P] A blond girl rides the waves.

[H] A girl gets wet from the water.

[LABEL] **neutral** [PRED] **neutral** [COEFF] 22.3426

[P] Woman in blue headscarf and black clothing carrying 2 trays of pastries outside a building.

[H] A lady carrying something in her hand to move it.

[LABEL] **entailment** [PRED] **neutral** [COEFF] 21.9168

[P] Three men, one in a blue shirt, one in a striped shirt and one in a white shirt are talking.

[H] A group of men are standing next to each other.

[LABEL] **neutral** [PRED] **neutral** [COEFF] 21.8718

[P] Five construction workers are working on a project.

[H] Some men are looking at a blueprint, others are arranging materials.

[LABEL] **contradiction** [PRED] **neutral** [COEFF] 21.8575

[P] A motocross rider is traveling along a dirt path with people watching.

[H] A rider is fixing his bike.

### 1.323 Component 322

[LABEL] **neutral** [PRED] **neutral** [COEFF] 71.0740

[P] A black woman walking down a street.

[H] The woman is walking to the store.

[LABEL] **neutral** [PRED] **contradiction** [COEFF] 66.3315

[P] Two women walking down the sidewalk.

[H] The women are walking to the restaurant.

[LABEL] **neutral** [PRED] **contradiction** [COEFF] 66.2574

[P] Two women are walking down a sidewalk.

[H] Woman are walking to the mall.

[LABEL] **neutral** [PRED] **contradiction** [COEFF] 56.3414

[P] A mother and daughter walking down a city street.

[H] A mother and daughter walk to the store.

[LABEL] **neutral** [PRED] **neutral** [COEFF] 53.7951

[P] A man dressed in black walks down the street.

[H] A man dressed in black walks to the store.

[LABEL] **neutral** [PRED] **neutral** [COEFF] 51.7031

[P] Several people are crossing a street.

[H] Some people are walking to a store.

[LABEL] **neutral** [PRED] **contradiction** [COEFF] 51.2412

[P] Different people are walking on a sidewalk, in both directions, in front of an orange canopy.

[H] People are walking around a market outside.

[LABEL] **contradiction** [PRED] **contradiction** [COEFF] 42.8413

[P] A young woman waits on a busy street at night.

[H] A young woman is waiting in a store.

[LABEL] **neutral** [PRED] **contradiction** [COEFF] 42.3591

[P] A man in a red shirt is walking in the grass near a sidewalk and empty street.

[H] The man is walking to the store

[LABEL] **neutral** [PRED] **neutral** [COEFF] 40.6891

[P] A woman wearing a pink white and orange dress with braids in her hair walking down a busy street.

[H] A woman is walking to a party.

[LABEL] **neutral** [PRED] **neutral** [COEFF] 40.1182

[P] A guy walking down the sidewalk.

[H] A man is walking to work.

[LABEL] **neutral** [PRED] **neutral** [COEFF] 40.1181

[P] A guy walking down the sidewalk.

[H] A man is walking to work.

[LABEL] **contradiction** [PRED] **contradiction** [COEFF] 39.1519

[P] A flock of people walking down an ancient street.

[H] A bunch of people walk through a museum.

[LABEL] **neutral** [PRED] **neutral** [COEFF] 39.0915

[P] Two motorcycle cops are sitting in the street talking.

[H] The cops are waiting for a criminal outside a store.

[LABEL] **neutral** [PRED] **neutral** [COEFF] 38.7052

[P] An elderly woman in an orange sweater is walking down the street.

[H] The woman is going to the grocery store.

[LABEL] **neutral** [PRED] **neutral** [COEFF] 37.2296

[P] An asian man moving carts on the sidewalk to their destination.

[H] A worker at a shopping center is collecting the carts.

### 1.324 Component 323

[LABEL] **contradiction** [PRED] **contradiction** [COEFF] 9.7730

[P] A man wearing a white jacket serves ice cream to several ladies from an ijs street cart.

[H] The man serving ice cream is wearing all black.

[LABEL] **neutral** [PRED] **contradiction** [COEFF] 8.8412

[P] A woman in a red shirt looking down at her cellphone and holding a bag.

[H] A woman has a pink cell phone.

[LABEL] **contradiction** [PRED] **contradiction** [COEFF] 8.6497

[P] A man in a striped shirt and two redheaded boys are posing for a picture outside.

[H] A man in a solid white shirt and two black - haired boys pose for pictures inside.

[LABEL] **contradiction** [PRED] **contradiction** [COEFF] 8.2790

[P] A woman in a red shirt playing the cello.

[H] The woman is wearing a blue dress.

[LABEL] **contradiction** [PRED] **contradiction** [COEFF] 8.2517

[P] A man wearing a white shirt is washing the outside window on the front of an airplane.

[H] The shirt is black

[LABEL] **contradiction** [PRED] **contradiction** [COEFF] 8.1905

[P] A thin man with messy, orange hair moves his hands over a flying saucer shaped metal object.

[H] A thin man with black, slick hair observes a flying saucer.

[LABEL] **contradiction** [PRED] **contradiction** [COEFF] 8.0857

[P] A boy on a black surfboard riding the wave on his stomach.

[H] A boy on a yellow surfboard riding the wave on his stomach.

[LABEL] **contradiction** [PRED] **contradiction** [COEFF] 8.0521

[P] A woman wearing a white top stands in front of an atm machine.

[H] A woman dressed in black walks past the atm machine.

[LABEL] **neutral** [PRED] **contradiction** [COEFF] 8.0199

[P] A groom is standing next to his bride in a white horse drawn carriage.

[H] Couple stands on a luxurious gold carriage

[LABEL] **contradiction** [PRED] **contradiction** [COEFF] 7.6692

[P] A woman wearing a red jacket speaking at a podium.

[H] The woman in blue sat behind the podium.

[LABEL] **contradiction** [PRED] **contradiction** [COEFF] 7.3969

[P] A person in a motocross uniform, and wearing a helmet, rides a red motorcycle.

[H] A person in a motocross uniform is riding a blue motorcycle.

[LABEL] **contradiction** [PRED] **contradiction** [COEFF] 7.3292

[P] A boy wearing green shorts is about to serve a volleyball.

[H] The boy is wearing an all black uniform.

[LABEL] **contradiction** [PRED] **contradiction** [COEFF] 6.8455

[P] This is a woman in a yellow coat looking for something she dropped while her male companion stares at the camera.

[H] A women in a red vest looking for her phone.

[LABEL] **contradiction** [PRED] **contradiction** [COEFF] 6.8120

[P] A woman in a white shirt works behind the counter at a cafe.

[H] A woman is wearing black.

[LABEL] **contradiction** [PRED] **contradiction** [COEFF] 6.6926

[P] A woman in a green dress takes a photo next to a large man in a dark suit.

[H] A woman in a black pantsuit.

[LABEL] **contradiction** [PRED] **contradiction** [COEFF] 6.6295

[P] A woman with a red and orange apron makes paper - mache orbs while her friend leans into the frame.

[H] A woman is wearing a black and white apron

### 1.325 Component 324

[LABEL] **entailment** [PRED] **entailment** [COEFF] 6.9052

[P] A woman in black stand in a train station as a train pulls up on the other side.

[H] A woman is at a train station.

[LABEL] **entailment** [PRED] **entailment** [COEFF] 6.8443

[P] A man in a red shirt is standing in a crowded room.

[H] A man is in a room.

[LABEL] **entailment** [PRED] **entailment** [COEFF] 6.1166

[P] Man in a blue shirt and red shorts standing on the sidewalk.

[H] A man is on the sidewalk

[LABEL] **entailment** [PRED] **entailment** [COEFF] 5.8614

[P] A man dressed in jeans and a black jacket walking down the street in the winter time.

[H] A man is on the street.

[LABEL] **entailment** [PRED] **entailment** [COEFF] 5.5012

[P] A person in a white hat is walking on the sidewalk.

[H] Someone is on the sidewalk.

[LABEL] entailment [PRED] entailment [COEFF] 5.3088

[P] Very colorful women at a party.

[H] Woman are at a party.

[LABEL] entailment [PRED] entailment [COEFF] 5.2230

[P] People are standing on the sidewalk of a street.

[H] People are on the sidewalk.

[LABEL] entailment [PRED] entailment [COEFF] 5.1970

[P] There is an asian woman in a black suit who is standing around and waiting at an airport.

[H] A woman is waiting at the airport.

[LABEL] entailment [PRED] entailment [COEFF] 5.0185

[P] A large group of people at a party.

[H] People are at a party.

[LABEL] entailment [PRED] entailment [COEFF] 4.8772

[P] A woman sitting on a bench on the sidewalk.

[H] A lady is on a bench.

[LABEL] entailment [PRED] entailment [COEFF] 4.8129

[P] A woman in a teal dress standing outside on a slightly cloudy day.

[H] A female is outside.

[LABEL] entailment [PRED] entailment [COEFF] 4.7095

[P] A young girl whips her hair over her head in a public pool

[H] A girl is in a public pool.

[LABEL] entailment [PRED] entailment [COEFF] 4.3883

[P] Young people sitting around and in a three foot deep pool.

[H] People are in a pool.

[LABEL] entailment [PRED] entailment [COEFF] 4.3466

[P] A blond girl with orange and blue streaks on her face in a crowd.

[H] A blonde is in the crowd.

[LABEL] entailment [PRED] entailment [COEFF] 4.3293

[P] A group of musicians are performing on a stage in front of a crowd.

[H] Musicians are on a stage

[LABEL] entailment [PRED] entailment [COEFF] 4.2857

[P] A group of people and a child are on a patio.

[H] People are on a patio.



### 1.326 Component 325

[LABEL] **contradiction** [PRED] **contradiction** [COEFF] 34.3713

[P] Women in colorful dresses dance down the street during a parade.

[H] A man displays his sheriff's badge.

[LABEL] **contradiction** [PRED] **contradiction** [COEFF] 31.7891

[P] A girl with dark hair pulled back in a ponytail and wearing a red shirt walks back after having thrown her bowling ball.

[H] A small boy laughs as he kicks a ball.

[LABEL] **contradiction** [PRED] **contradiction** [COEFF] 31.7013

[P] One young man kicks another young man in front of a two story house.

[H] A girl plays with her dolls.

[LABEL] **contradiction** [PRED] **contradiction** [COEFF] 30.3270

[P] A man in a white t - shirt is about to dunk a basketball through a net - less hoop.

[H] A group of women are running down the street.

[LABEL] **contradiction** [PRED] **contradiction** [COEFF] 27.8891

[P] A man in a green shirt, black pants, black hat, and a backpack, acting like he was pushing a stone wall.

[H] A girl plays with mud

[LABEL] **contradiction** [PRED] **contradiction** [COEFF] 26.1310

[P] Three women in dresses and headscarves outside.

[H] A group of men watch tv

[LABEL] **contradiction** [PRED] **contradiction** [COEFF] 25.6586

[P] A man is leaning against the railing on the third floor of a terminal.

[H] Two girls are dancing.

[LABEL] **contradiction** [PRED] **contradiction** [COEFF] 25.2704

[P] A man, wearing a red sash and white shirt, walks a pig with a long piece of rope

[H] A girl and her dog go for a walk

[LABEL] **contradiction** [PRED] **contradiction** [COEFF] 25.0503

[P] Girl with braid is wearing a green vest and holding gold and green pompoms.

[H] There is a man with a watch.

[LABEL] **contradiction** [PRED] **contradiction** [COEFF] 24.3387

[P] A 90 - year - old woman blows out the '9' and '0' candles on her birthday cake at the dinner table.

[H] A boy is having a birthday party with his friends.

[LABEL] **contradiction** [PRED] **contradiction** [COEFF] 23.9721

[P] A man in a black jacket, burgundy shirt and blue jeans, walking past a newspaper vendor stand in

a crowded subway station.

[H] A girl tries to talk to the vendor at the subway station

[LABEL] **contradiction** [PRED] **contradiction** [COEFF] 23.9607

[P] A little girl in a pink cowgirl hat and blue cast over her arm, is walking a sheep.

[H] A boy milks a cow.

[LABEL] **contradiction** [PRED] **contradiction** [COEFF] 23.6782

[P] A man in a white robe with a purple sash places his hand on the forehead of another man.

[H] Two women hug as they celebrate graduating

[LABEL] **contradiction** [PRED] **contradiction** [COEFF] 23.6223

[P] In a black leather coat, a man waiting for the subway to come pauses to look up from his book to check the oncoming track.

[H] A woman, holding a celebrity magazine, looks out the window as she gets her hair cut and dyed.

[LABEL] **contradiction** [PRED] **contradiction** [COEFF] 23.2848

[P] A woman with flowers in her hair balances a large bowl of assorted fruits on her head.

[H] A guy is selling vegetables

[LABEL] **contradiction** [PRED] **contradiction** [COEFF] 23.0171

[P] This young female dressed in green and red looks as though she is flying in the air holding long ribbons in both of her hands.

[H] A man goes to the bathroom.

## 1.327 Component 326

[LABEL] **contradiction** [PRED] **contradiction** [COEFF] 27.7232

[P] A woman in a white shirt is holding a black tray.

[H] The woman is naked

[LABEL] **contradiction** [PRED] **contradiction** [COEFF] 26.8933

[P] A man wearing a red shirt and black shorts on a unicycle holding three baseball bats for a crowd of people.

[H] The man is naked

[LABEL] **contradiction** [PRED] **contradiction** [COEFF] 25.2629

[P] One man in his 60s holding a staff while wearing ethnic clothing.

[H] The man is naked.

[LABEL] **contradiction** [PRED] **contradiction** [COEFF] 24.9169

[P] A man wearing black and gold is preparing for competition at medieval times event.

[H] The man is naked

[LABEL] **contradiction** [PRED] **contradiction** [COEFF] 22.4162

[P] Guys in different color outfits, wearing helmets are sitting on bikes.

[H] The guys are naked

[LABEL] contradiction [PRED] contradiction [COEFF] 20.6140

[P] Two guys in blue suits and yellow helmets are using things that look like sponges with handles to spread some substance on flat ground in the winter.

[H] The two guys are naked

[LABEL] contradiction [PRED] contradiction [COEFF] 20.2794

[P] A little girl in a denim jacket running through a field.

[H] The little girl was naked.

[LABEL] contradiction [PRED] contradiction [COEFF] 19.3474

[P] A short - haired woman wearing a blue coat and green skirt sits on the ground behind a red blanket, welling her wares.

[H] The woman is naked

[LABEL] contradiction [PRED] contradiction [COEFF] 18.8642

[P] A man wearing a red shirt, hat and brown pants is on a skateboard going down a ramp.

[H] A man is naked as slides down the ramp

[LABEL] contradiction [PRED] contradiction [COEFF] 18.5443

[P] The young woman with the scarf is giving a present to someone.

[H] The woman is naked

[LABEL] contradiction [PRED] contradiction [COEFF] 18.5277

[P] A young man clad in a jersey and shorts watches some ultimate frisbee players in action.

[H] The young man is naked.

[LABEL] contradiction [PRED] contradiction [COEFF] 17.6824

[P] Men dressed in either theatrical or historical attire riding horses.

[H] The men are naked.

[LABEL] contradiction [PRED] contradiction [COEFF] 17.5734

[P] A man wearing a black pullover takes a photograph.

[H] A man is naked.

[LABEL] contradiction [PRED] contradiction [COEFF] 17.4387

[P] Two boys and a girl dressed in traditional clothing.

[H] The people are naked

[LABEL] contradiction [PRED] contradiction [COEFF] 17.4359

[P] A man wearing a silver cap and a green tank top is singing into a microphone.

[H] The man is naked.

[LABEL] contradiction [PRED] contradiction [COEFF] 16.7889

[P] Twins dressed identically in purple and gold sweaters with gray pants and black shoes, holding on to each other.

[H] Twins are naked

### 1.328 Component 327

[LABEL] **contradiction** [PRED] **contradiction** [COEFF] 5.8241

[P] A little girl learning to dance.

[H] The girl is eating

[LABEL] **contradiction** [PRED] **contradiction** [COEFF] 4.7244

[P] A young child playing in a fountain.

[H] The child is playing at the beach.

[LABEL] **contradiction** [PRED] **contradiction** [COEFF] 4.3534

[P] A mother with a kid on a bicycle.

[H] The mother is riding the car.

[LABEL] **contradiction** [PRED] **contradiction** [COEFF] 4.3434

[P] A crowd, including a police officer, watches as two women have a pillow fight.

[H] Two women are mud wrestling.

[LABEL] **contradiction** [PRED] **contradiction** [COEFF] 3.7166

[P] A child in a yellow dress sits on the rocks.

[H] The kid is standing on the grass.

[LABEL] **contradiction** [PRED] **contradiction** [COEFF] 3.6497

[P] A man with frightening makeup and studded leather clothing is playing a bass guitar at a rock concert.

[H] This is an orchestra show.

[LABEL] **contradiction** [PRED] **contradiction** [COEFF] 3.6208

[P] A man and a smiling young boy in a float vest are swimming together.

[H] The man is climbing a tree.

[LABEL] **contradiction** [PRED] **contradiction** [COEFF] 3.6086

[P] A man playing baseball.

[H] A man is sleep.

[LABEL] **contradiction** [PRED] **contradiction** [COEFF] 3.5996

[P] A man in a red t - shirt and khakis plays the hand drums for a crowd of people.

[H] The man is playing the piano.

[LABEL] **contradiction** [PRED] **contradiction** [COEFF] 3.5297

[P] A man is floating on a small boat down a city water street.

[H] The man is riding a bike.

[LABEL] **contradiction** [PRED] **contradiction** [COEFF] 3.5009

[P] A group of kids float in the middle of a pond.

[H] Kids walk on the road.

[LABEL] contradiction [PRED] contradiction [COEFF] 3.3929

[P] A man sweeping the sidewalk.

[H] A man is shoveling his driveway.

[LABEL] contradiction [PRED] contradiction [COEFF] 3.3707

[P] A woman with long brown hair wearing a white sleeveless shirt, a man with long brown hair wearing a green t - shirt and tattoos on his arms, and another woman with black hair wearing a green dress, also with tattoos, are in the checkout line at a supermarket.

[H] They are at the checkout line at the bar.

[LABEL] contradiction [PRED] contradiction [COEFF] 3.3624

[P] A bearded man wearing a hat drives a car.

[H] The man is riding a bike.

[LABEL] contradiction [PRED] contradiction [COEFF] 3.3595

[P] Two men on bikes are passing a series of buildings that specialize in medical services.

[H] Two men take the bus.

[LABEL] contradiction [PRED] contradiction [COEFF] 3.3474

[P] Two men walking at an amusement park one is pushing a stroller the other is carrying a stuffed animal.

[H] The men are at the space museum.

### 1.329 Component 328

[LABEL] entailment [PRED] entailment [COEFF] 17.6634

[P] A young, asian man is seen playing his guitar.

[H] A man is playing a guitar.

[LABEL] entailment [PRED] entailment [COEFF] 15.0180

[P] A three man band playing at a small concert.

[H] Musicians play a concert.

[LABEL] entailment [PRED] entailment [COEFF] 14.5778

[P] A young man in a black t - shirt plays croquet with an inflatable mallet.

[H] A man plays croquet.

[LABEL] entailment [PRED] entailment [COEFF] 13.8128

[P] A large man plays the saxophone in an orchestra.

[H] A man plays an instrument.

[LABEL] entailment [PRED] entailment [COEFF] 13.7833

[P] A group of young people gathered around a woman in a gallery of artistic vases.

[H] People are in a gallery.

[LABEL] entailment [PRED] entailment [COEFF] 12.5092

[P] The 2 greyhound dog is running around a track.

[H] A dog is on the track.

[LABEL] **entailment** [PRED] **entailment** [COEFF] 12.4380

[P] A hippie playing his guitar.

[H] A person plays guitar.

[LABEL] **contradiction** [PRED] **entailment** [COEFF] 12.0115

[P] An older gentlemen puts on a one - man band with various instruments.

[H] A band performs.

[LABEL] **entailment** [PRED] **entailment** [COEFF] 11.5154

[P] A smiling man with short brown hair in a black shirt with an open orange shoe box.

[H] A man has hair.

[LABEL] **entailment** [PRED] **entailment** [COEFF] 11.1400

[P] Group of children and adults ride bicycles on a dirt road in the woods.

[H] People are on bicycles.

[LABEL] **entailment** [PRED] **entailment** [COEFF] 10.5813

[P] A man with sunglasses, a white shirt and jeans is playing mini - golf.

[H] A man is playing golf.

[LABEL] **entailment** [PRED] **entailment** [COEFF] 10.3887

[P] A street musician plays his accordion in hopes of earning some money.

[H] A musician playing music.

[LABEL] **entailment** [PRED] **entailment** [COEFF] 9.9010

[P] A man plays a blue guitar enthusiastically

[H] A man plays guitar

[LABEL] **entailment** [PRED] **entailment** [COEFF] 9.8812

[P] Two white and black dogs play and jump in a fenced area.

[H] Dogs play.

[LABEL] **entailment** [PRED] **entailment** [COEFF] 9.8751

[P] Three men play street percussion instruments.

[H] Men play instruments

[LABEL] **entailment** [PRED] **entailment** [COEFF] 9.7877

[P] A young boy paddles across the water in a makeshift boat.

[H] A boy is in a boat.

### 1.330 Component 329

[LABEL] **neutral** [PRED] **neutral** [COEFF] 20.9587

[P] A woman walking out of a shopping center.

[H] The woman walking out of the shopping center is happy.

[LABEL] **neutral** [PRED] **neutral** [COEFF] 20.0823

[P] A women's team from russia is playing basketball game.

[H] They are the best team in the world

[LABEL] **neutral** [PRED] **neutral** [COEFF] 17.5410

[P] Man in boat wearing athletic shorts, a backwards baseball cap and sunglasses unhooks a fish he has caught while fishing.

[H] The fish is the largest he has ever caught.

[LABEL] **neutral** [PRED] **neutral** [COEFF] 17.5057

[P] Two asian women and an asian girl are sitting at a farmers market and are selling produce including yams.

[H] The women made a lot of money selling yams.

[LABEL] **neutral** [PRED] **neutral** [COEFF] 17.1493

[P] A group of people form a procession, several of them holding signs with photographs on them.

[H] The majority of the group of people in the procession are happy to be there.

[LABEL] **contradiction** [PRED] **neutral** [COEFF] 16.5636

[P] The guy in the blue sweater is crossing the street with an umbrella in hand.

[H] The umbrella is edible.

[LABEL] **neutral** [PRED] **neutral** [COEFF] 16.3079

[P] A man in a cap and a blue plaid button - down shirt is holding a bird cage with a bird inside.

[H] The bird is very pretty.

[LABEL] **neutral** [PRED] **neutral** [COEFF] 15.2691

[P] A boy smiles underwater.

[H] The boy has had a lot of swimming lessons

[LABEL] **neutral** [PRED] **neutral** [COEFF] 15.1117

[P] Two people are eating a meal at a table with umbrella on top.

[H] They are also having a wonderful conversation.

[LABEL] **neutral** [PRED] **neutral** [COEFF] 14.8075

[P] A man videotaping a group of people in front of a from new york banner.

[H] The people are well - dressed

[LABEL] **neutral** [PRED] **neutral** [COEFF] 14.6062

[P] A woman with four children are eating ice cream cones.

[H] The woman bought ice cream cones because the summer was really hot.

[LABEL] **neutral** [PRED] **neutral** [COEFF] 14.5467

[P] A woman is dressed for roller derby in pads, shorts and fishnet tights.

[H] The woman is the best at roller derby.

[LABEL] **neutral** [PRED] **neutral** [COEFF] 14.5309  
 [P] A little boy in a red soccer uniform is standing next to a soccer net.  
 [H] The boy is proud to be a member of the team

[LABEL] **neutral** [PRED] **neutral** [COEFF] 13.9307  
 [P] A child in a red long-sleeve shirt is pointing at the red tulips.  
 [H] A child is pointing at red tulips because he likes them.

[LABEL] **neutral** [PRED] **neutral** [COEFF] 13.8229  
 [P] A girl in a plaid dress is walking on a sidewalk next to a stone building.  
 [H] The girl is hot

[LABEL] **neutral** [PRED] **neutral** [COEFF] 13.7807  
 [P] A man wearing a beige shirt and cowboy hat ropes a calf while riding a brown horse.  
 [H] The cowboy is very talented with rodeo events.

### 1.331 Component 330

[LABEL] **contradiction** [PRED] **contradiction** [COEFF] 5.2909  
 [P] Two tired children rest on couches at an art museum while the adults around them view the art.  
 [H] Three children run around as adults in a museum sit on a bench.

[LABEL] **contradiction** [PRED] **contradiction** [COEFF] 5.2506  
 [P] A woman holding a pink balloon and wearing a fuzzy pink tiara, and a man with his head tilted slightly forward and smiling with his mouth wide open are standing next to one another.  
 [H] A woman punches a man in the lip

[LABEL] **contradiction** [PRED] **contradiction** [COEFF] 4.7675  
 [P] A man wearing a belt, a tan jacket and brown shoes is walking next to a woman with a brown purse, a black outfit, and sunglasses on a sidewalk.  
 [H] A man wearing sweatpants and rainbow colored shoes bumps into a lady in a mall food court.

[LABEL] **contradiction** [PRED] **contradiction** [COEFF] 4.2017  
 [P] A woman in a hat carrying several baskets and a child wearing a blue hat by her back.  
 [H] A woman carries a small goat on her back.

[LABEL] **contradiction** [PRED] **contradiction** [COEFF] 4.1520  
 [P] Three male figures of different ages stand next to some rocks as they are dwarfed by a large upright wooden cross.  
 [H] Three older women figures are sitting next to sand as they are dwarfed by a small sideways metal cross.

[LABEL] **neutral** [PRED] **contradiction** [COEFF] 4.0189  
 [P] A person is laying in the grass and relaxing.  
 [H] The person is laying the park.



[LABEL] **contradiction** [PRED] **contradiction** [COEFF] 3.9524  
[P] Woman stands at table under a yellow, green and blue umbrella, while child sits at table under umbrella  
[H] A woman sits at a desk in her office, while a baby crawls on the floor.

[LABEL] **contradiction** [PRED] **contradiction** [COEFF] 3.9120  
[P] Two shirtless asian men playing table tennis.  
[H] Two white men playing catch.

[LABEL] **contradiction** [PRED] **contradiction** [COEFF] 3.7748  
[P] A man in blue jeans and a blue shirt is washing the exterior of a window.  
[H] A man is painting a wall.

[LABEL] **contradiction** [PRED] **contradiction** [COEFF] 3.6872  
[P] A person with short black hair, glasses, light blue long - sleeved shirt, and jeans is laying on a marble bench that is jutting out of a black brick wall.  
[H] A person with red hair is skateboarding down the street.

[LABEL] **contradiction** [PRED] **contradiction** [COEFF] 3.6386  
[P] A girl on a bike stops to look back.  
[H] A girl is skateboarding

[LABEL] **contradiction** [PRED] **contradiction** [COEFF] 3.6337  
[P] A blond woman walking a plaza in front of brightly colored buildings.  
[H] A blonde woman is climbing buildings in the city.

[LABEL] **neutral** [PRED] **contradiction** [COEFF] 3.4241  
[P] A woman looks after children playing on a rickety wooden walkway.  
[H] A woman watches her children play on the jungle gym.

[LABEL] **contradiction** [PRED] **contradiction** [COEFF] 3.3832  
[P] A small dog on a leash jumps toward a pink ball  
[H] A dog sits in a crate waiting to see the veterinarian.

[LABEL] **contradiction** [PRED] **contradiction** [COEFF] 3.3709  
[P] A man washing windows on a red brick building.  
[H] A man throwing a brick through windows.

[LABEL] **contradiction** [PRED] **contradiction** [COEFF] 3.3703  
[P] A boy is on the beach with a paddle in his hand as he walks through the ocean water.  
[H] A kid jogs on a track.

### 1.332 Component 331

[LABEL] **neutral** [PRED] **neutral** [COEFF] 19.4994  
[P] An older gentleman plays the guitar on stage.  
[H] A plays guitar for a band at a concert.

[LABEL] **entailment** [PRED] **neutral** [COEFF] 18.8053  
[P] A white man wearing a blue shirt and black apron is ready to take down orders for food.  
[H] Someone is working at a restaurant.

[LABEL] **neutral** [PRED] **neutral** [COEFF] 18.2284  
[P] Carrying a large basket, a man navigates his way through the street.  
[H] A man is carrying his food in a basket.

[LABEL] **neutral** [PRED] **entailment** [COEFF] 17.2908  
[P] People preparing a table for an upcoming party.  
[H] A group of people put food on the table for the party.

[LABEL] **neutral** [PRED] **neutral** [COEFF] 17.2664  
[P] A rock band is playing for a crowd.  
[H] People are at a music festival.

[LABEL] **neutral** [PRED] **neutral** [COEFF] 16.1489  
[P] A young boy is playing in the yard.  
[H] A boy plays in the yard with some toys.

[LABEL] **neutral** [PRED] **neutral** [COEFF] 15.9503  
[P] A man with a large net stands in water that is up to his chest.  
[H] A man is trying to catch fish.

[LABEL] **neutral** [PRED] **neutral** [COEFF] 15.4497  
[P] A woman in a white shirt is in a kitchen.  
[H] A woman is cooking in the kitchen.

[LABEL] **neutral** [PRED] **neutral** [COEFF] 15.3826  
[P] A group of people on different colored boats enjoys a great day on the water.  
[H] A group of people are fishing in boats on the water.

[LABEL] **entailment** [PRED] **neutral** [COEFF] 15.2645  
[P] A big outdoor market along a fence.  
[H] The market has items for sale.

[LABEL] **neutral** [PRED] **neutral** [COEFF] 14.5116  
[P] One man wearing a green shirt is playing music on a blue set of drums.  
[H] A drummer in green playing blue drums at a music festival.

[LABEL] **neutral** [PRED] **neutral** [COEFF] 14.3692  
[P] The crowd cheers a player on the field.  
[H] A baseball game is taking place.

[LABEL] **neutral** [PRED] **entailment** [COEFF] 14.3189  
[P] A little boy in red shorts jumps into the water.

[H] A little boy is jumping in a swimming pool.

[LABEL] entailment [PRED] neutral [COEFF] 14.2939

[P] People playing instruments on the street while dressed as santa claus.

[H] There is a band dressed as santa claus playing on the street.

[LABEL] neutral [PRED] neutral [COEFF] 14.2753

[P] An asian man prepares his produce at his stand for the daily market.

[H] The man is setting up fruits and vegetables.

[LABEL] entailment [PRED] neutral [COEFF] 14.0716

[P] A man wearing a blue denim shirt is standing in front of a man who is squirting a condiment on something.

[H] A man wearing a blue denim shirt is standing in front of a man putting a condiment on food.

### 1.333 Component 332

[LABEL] entailment [PRED] entailment [COEFF] 12.7524

[P] A long - haired man in a white t - shirt and jeans plays a keyboard standing

[H] A man is playing a keyboard.

[LABEL] entailment [PRED] entailment [COEFF] 12.4686

[P] A young asian boy in a orange long - sleeved t - shirt holds a magazine.

[H] A boy is holding a magazine.

[LABEL] entailment [PRED] entailment [COEFF] 11.0178

[P] A young man in a blue sweatshirt and jeans holds a pumpkin in his arms as he stands amidst a field of pumpkins.

[H] A man is holding a pumpkin.

[LABEL] entailment [PRED] entailment [COEFF] 10.3038

[P] A young man with brown hair wearing a green outfit is rowing with an oar.

[H] A man is holding an oar.

[LABEL] entailment [PRED] entailment [COEFF] 9.0067

[P] A bearded man wearing a bandanna with skulls on it is holding a camera.

[H] A man is holding a camera.

[LABEL] entailment [PRED] entailment [COEFF] 8.5770

[P] A person carrying a microphone has a red covering over his head as he walks in front of a black covered table.

[H] Someone is carrying a microphone.

[LABEL] entailment [PRED] entailment [COEFF] 8.2694

[P] A man in a brown suit is speaking into a microphone while sitting down with his right foot up.

[H] A man speaks into the microphone.

[LABEL] entailment [PRED] entailment [COEFF] 8.0830

[P] A man sits on a beach wearing swim trunks and a lei, holding a blue umbrella over his head.  
[H] A man is holding an umbrella.

[LABEL] entailment [PRED] entailment [COEFF] 7.4656

[P] A man in a camouflage cap and jeans is sitting on a bench reading a book.  
[H] There is a man reading a book.

[LABEL] entailment [PRED] entailment [COEFF] 7.3341

[P] There is an asian woman in a black suit who is standing around and waiting at an airport.  
[H] A woman is waiting at the airport.

[LABEL] entailment [PRED] entailment [COEFF] 7.3185

[P] A smiling, bare chested oriental man wearing gray pants holds a sharp object against his chest in a disturbing portrayal of the last moments before he will commit suicide.  
[H] A man holds a sharp object.

[LABEL] entailment [PRED] entailment [COEFF] 7.3130

[P] An old weathered, bearded man wearing all black, riding a beautiful white donkey on white rocks.  
[H] An old man is riding a donkey.

[LABEL] entailment [PRED] entailment [COEFF] 7.2538

[P] A middle - aged man sits in an industrial workspace reading a newspaper.  
[H] A man is reading a newspaper.

[LABEL] entailment [PRED] entailment [COEFF] 7.2184

[P] A church choir is rehearsing with white books open in their hands and an instructor in front conducting.  
[H] The people are holding books.

[LABEL] entailment [PRED] entailment [COEFF] 7.2123

[P] A woman in a pink shirt and khaki shorts looks over a crumbling rock face overlooking a large forested area.  
[H] A woman is looking over a rock

[LABEL] entailment [PRED] entailment [COEFF] 7.0844

[P] A little boy with very curly hair is sitting in a blue chair with a toy in his hands.  
[H] A curly - haired boy is holding a toy.

### 1.334 Component 333

[LABEL] entailment [PRED] entailment [COEFF] 36.7356

[P] A blond boy with a long purple mohawk is playing the violin.  
[H] The boy is playing an instrument.

[LABEL] entailment [PRED] entailment [COEFF] 31.7934

[P] A young musician playing a small guitar and singing, while sitting in a white plastic chair.  
[H] The musician is playing an instrument.

[LABEL] entailment [PRED] entailment [COEFF] 30.9302  
[P] A person in a bright blue shirt is playing the guitar.  
[H] A person is playing a musical instrument.

[LABEL] entailment [PRED] entailment [COEFF] 30.6167  
[P] A closeup shot of a long - haired man playing a red electric guitar.  
[H] A man is playing an instrument.

[LABEL] entailment [PRED] entailment [COEFF] 30.4910  
[P] A man is standing playing the guitar.  
[H] The man plays a musical instrument.

[LABEL] entailment [PRED] entailment [COEFF] 30.0042  
[P] A woman with closed eyes is playing a cello and singing into a microphone.  
[H] A woman plays an instrument.

[LABEL] entailment [PRED] entailment [COEFF] 29.6642  
[P] A woman in a red shirt plays a cello.  
[H] A woman is playing a musical instrument.

[LABEL] entailment [PRED] entailment [COEFF] 29.0858  
[P] A man is sitting on the ground strumming an electric guitar.  
[H] A man is playing an instrument.

[LABEL] entailment [PRED] entailment [COEFF] 28.6883  
[P] A woman in a short red dress and black boots stands while playing an electrified red cello.  
[H] A woman plays an instrument.

[LABEL] entailment [PRED] entailment [COEFF] 28.3759  
[P] A woman in a sweater plays the harp.  
[H] A woman is playing an instrument.

[LABEL] neutral [PRED] entailment [COEFF] 28.3724  
[P] A man wearing a big white hat and a logo t - shirt is playing guitar and singing.  
[H] A man is playing instrument.

[LABEL] entailment [PRED] entailment [COEFF] 27.9977  
[P] A man is playing a guitar on a bench in the woods and another man is praying on another bench.  
[H] Someone is playing an instrument.

[LABEL] entailment [PRED] entailment [COEFF] 27.6478  
[P] A woman in a red uniform is playing the flute.  
[H] Woman playing an instrument.

[LABEL] entailment [PRED] entailment [COEFF] 27.1082  
[P] Two men are each playing a violin.

[H] The two men are playing an instrument.

[LABEL] **entailment** [PRED] **entailment** [COEFF] 26.3106

[P] An old man in white and pink is playing an acoustic guitar by a red bucket of money and a stand of red tomatoes.

[H] A man is playing an instrument.

[LABEL] **entailment** [PRED] **entailment** [COEFF] 26.0013

[P] A woman with blue hair and ripped pantyhose sits against a blue wall while playing her guitar.

[H] A woman is playing an instrument.

### 1.335 Component 334

[LABEL] **entailment** [PRED] **entailment** [COEFF] 22.7017

[P] A man in a blue shirt smiles at a baby he's carrying in a sling.

[H] The man is wearing a shirt.

[LABEL] **entailment** [PRED] **entailment** [COEFF] 22.1283

[P] One man in a white shirt constructing an industrial sized sink.

[H] The man is wearing a shirt.

[LABEL] **entailment** [PRED] **entailment** [COEFF] 21.5127

[P] A man with a gray and orange hat and a blue sweater is smiling next to a pole.

[H] The man is wearing a hat.

[LABEL] **entailment** [PRED] **entailment** [COEFF] 21.1828

[P] A man with a gray shirt holds a young infant in his hands.

[H] A man is wearing a shirt.

[LABEL] **entailment** [PRED] **entailment** [COEFF] 18.1725

[P] A man in a blue shirt is working with a tool in a field on a plant.

[H] The man is wearing a shirt.

[LABEL] **entailment** [PRED] **entailment** [COEFF] 17.8569

[P] A woman in a striped dress walks with shopping bags.

[H] A woman is wearing a dress.

[LABEL] **entailment** [PRED] **entailment** [COEFF] 17.5454

[P] A man in a camel colored jacket.

[H] The man is wearing a jacket.

[LABEL] **entailment** [PRED] **entailment** [COEFF] 16.7234

[P] A man in a black top is playing the drums and seems to be sweating.

[H] A man is wearing a top.

[LABEL] **neutral** [PRED] **entailment** [COEFF] 16.4509

[P] A man in a white shirt is singing.

[H] A man is wearing a shirt.

[LABEL] **entailment** [PRED] **entailment** [COEFF] 15.5572

[P] A girl in a petterned shirt is talking to a guy with a hat in a billiards room.

[H] The girl is wearing a shirt.

[LABEL] **entailment** [PRED] **entailment** [COEFF] 15.4195

[P] A person in a red and black shirt has their arms crossed and looks at the camera.

[H] The person is wearing a shirt.

[LABEL] **entailment** [PRED] **entailment** [COEFF] 15.3918

[P] A woman in a green shirt swinging a rope.

[H] The woman is wearing a shirt.

[LABEL] **entailment** [PRED] **entailment** [COEFF] 15.2057

[P] Woman in a hat outside a building on a stool with a canvas on her lap doing art.

[H] A woman is wearing a hat.

[LABEL] **entailment** [PRED] **entailment** [COEFF] 14.4141

[P] A woman with a purple dress fixing her hair.

[H] The woman is wearing a dress.

[LABEL] **entailment** [PRED] **entailment** [COEFF] 13.9017

[P] Woman in a black bathing suit, lounging on a bed, atop of a building, with a tall white umbrella within her view.

[H] A woman is wearing a bathing suit.

[LABEL] **entailment** [PRED] **entailment** [COEFF] 13.7552

[P] A person in a red shirt jumping over a railing.

[H] A person is wearing a shirt.

### 1.336 Component 335

[LABEL] **neutral** [PRED] **neutral** [COEFF] 66.8808

[P] A little boy plays outdoors in water spurting up from an inground fountain.

[H] A little boy happily plays outdoors

[LABEL] **neutral** [PRED] **neutral** [COEFF] 62.1659

[P] Clown making some balloon animals.

[H] Clown happily making some balloon animals

[LABEL] **neutral** [PRED] **neutral** [COEFF] 61.4860

[P] There are many people walking at times square in new york near a building with a lion king poster in the window.

[H] There are many people happily walking at times square

[LABEL] **neutral**            [PRED] **neutral**            [COEFF] 58.7694  
[P] A woman is blowing the seeds from a dandelion.  
[H] A woman is happily blowing the seeds.

[LABEL] **neutral**            [PRED] **neutral**            [COEFF] 56.8818  
[P] The child leaps across to land on the frog statue.  
[H] The child happily leaps.

[LABEL] **neutral**            [PRED] **neutral**            [COEFF] 54.2675  
[P] People walk down the busy sidewalk.  
[H] People happily walk down the sidewalk.

[LABEL] **neutral**            [PRED] **neutral**            [COEFF] 51.4025  
[P] An orchestra of about 30 people are practicing on the stage of what appears to be an auditorium full of green chairs.  
[H] An orchestra of about 30 people are happily practicing.

[LABEL] **neutral**            [PRED] **neutral**            [COEFF] 51.1153  
[P] A man lounging in a red sectional sofa in home store.  
[H] A man happily lounging

[LABEL] **neutral**            [PRED] **neutral**            [COEFF] 48.2794  
[P] A woman raises her hand as a bus passes by.  
[H] A woman happily raises her hand

[LABEL] **neutral**            [PRED] **neutral**            [COEFF] 48.0249  
[P] Two girls talking while sitting on the stairs.  
[H] Two girls are happily talking.

[LABEL] **neutral**            [PRED] **neutral**            [COEFF] 46.0946  
[P] An african man and woman, they are holding hands, and he is holding a wire connected to a device.  
[H] An african man and woman are happily holding hands.

[LABEL] **neutral**            [PRED] **neutral**            [COEFF] 40.7612  
[P] There is a herd of camels with two people riding atop each one while behind a front drop of water.  
[H] There is a herd of camels with two people happily riding

[LABEL] **neutral**            [PRED] **neutral**            [COEFF] 40.0604  
[P] A man laying on the floor as he works on an unfinished wooden chair with a tool on the ground.  
[H] A man is happily laying on the floor.

[LABEL] **neutral**            [PRED] **neutral**            [COEFF] 39.3654  
[P] People are shopping in an outdoor market.  
[H] People are happily shopping

[LABEL] **neutral**            [PRED] **neutral**            [COEFF] 38.1037



[P] A young man playing on the side of a snow covered road.  
[H] A young male happily playing on the edge of a weather covered street.

[LABEL] **neutral** [PRED] **neutral** [COEFF] 37.5334

[P] A man with glasses is reading a book while lying in a red, orange and yellow striped hammock next to a sidewalk.

[H] A man with glasses is happily reading a book.

### 1.337 Component 336

[LABEL] **entailment** [PRED] **entailment** [COEFF] 42.2496

[P] A woman is wearing a sun cap by a red stand.

[H] A lady is wearing a sun hat next to a red stand.

[LABEL] **entailment** [PRED] **entailment** [COEFF] 29.4963

[P] A young woman with blond - hair in a white shirt and black shorts is about to strike a volleyball.

[H] A girl is playing volleyball

[LABEL] **entailment** [PRED] **entailment** [COEFF] 29.3350

[P] Blond woman on a crowded train applying mascara.

[H] The girl applies mascara on the train.

[LABEL] **entailment** [PRED] **entailment** [COEFF] 28.1292

[P] Young girl sliding down an inflated slide

[H] The young female is moving down a slide.

[LABEL] **entailment** [PRED] **entailment** [COEFF] 28.0293

[P] A woman is taking a photograph on a beach at the edge of the water while a girl stands in the foreground.

[H] A lady takes a picture near a beach

[LABEL] **entailment** [PRED] **entailment** [COEFF] 25.3437

[P] A girl wearing a navy blue sweatshirt is feeding a brown and white goat.

[H] A women is feeding an animal.

[LABEL] **entailment** [PRED] **entailment** [COEFF] 23.9462

[P] A bride folds her arms at a beach.

[H] A woman is at the beach.

[LABEL] **entailment** [PRED] **entailment** [COEFF] 23.3209

[P] A little girl wearing a yellow shirt and earrings is eating food out of a green bowl with a spoon.

[H] A female child is eating.

[LABEL] **entailment** [PRED] **entailment** [COEFF] 22.0078

[P] A tattooed blond woman is holding a purse.

[H] A female holds a purse.

[LABEL] entailment [PRED] entailment [COEFF] 20.2734  
[P] A girl wearing boots stands next to a swimming pool and four people seated on a bench.  
[H] There's a woman standing beside a pool.

[LABEL] entailment [PRED] entailment [COEFF] 18.2562  
[P] A young child leads a large dog on the shore.  
[H] A kid is with a dog near the water.

[LABEL] entailment [PRED] entailment [COEFF] 17.0519  
[P] A bride is sitting on a tan couch.  
[H] A woman is sitting.

[LABEL] entailment [PRED] entailment [COEFF] 16.9468  
[P] A crowd gathers around a woman clasping her head  
[H] A crowd gathers around a female.

[LABEL] entailment [PRED] entailment [COEFF] 16.2417  
[P] A young girl clings to a fence and watches the horse on the other side.  
[H] A child watches an animal on the other side of the fence.

[LABEL] entailment [PRED] entailment [COEFF] 15.5558  
[P] A little girl is getting splashed by water.  
[H] A child is getting splashed by water.

[LABEL] entailment [PRED] entailment [COEFF] 15.2886  
[P] A man is standing next to a woman, with his arm around her waist.  
[H] A man has his arm around a girls waist.

### 1.338 Component 337

[LABEL] entailment [PRED] entailment [COEFF] 44.7277  
[P] A man in a white shirt and black pants is standing near a bed.  
[H] The man is wearing clothes.

[LABEL] entailment [PRED] entailment [COEFF] 44.0457  
[P] A blond woman in a red jacket wearing black and white striped pants.  
[H] The woman is wearing clothes.

[LABEL] entailment [PRED] entailment [COEFF] 36.1843  
[P] A young female wearing a red and white striped shirt, and blue leggings is suspended in air with legs outstretched while holding onto black poles.  
[H] The young female is wearing clothes.

[LABEL] entailment [PRED] entailment [COEFF] 35.3268  
[P] A woman in a brown shirt with her hair tied behind her head is looking through a rather large microscope.  
[H] A woman is wearing clothes.

[LABEL] entailment [PRED] entailment [COEFF] 34.3817  
[P] A man in a blue sweatsuit and a woman wearing a brown jacket and brown boots walk together.  
[H] The man is wearing clothing.

[LABEL] entailment [PRED] entailment [COEFF] 31.1984  
[P] A man wearing a blue shirt stands between two walls.  
[H] The man is wearing clothes.

[LABEL] entailment [PRED] entailment [COEFF] 26.8427  
[P] A man in a sweater and black pants waits.  
[H] A man is wearing clothes.

[LABEL] entailment [PRED] entailment [COEFF] 25.6223  
[P] A child in a white shirt and jeans.  
[H] A child wearing clothing.

[LABEL] entailment [PRED] entailment [COEFF] 22.8902  
[P] A woman dressed in pink is holding a book in front of a veteran memorial.  
[H] The woman is wearing clothing.

[LABEL] entailment [PRED] entailment [COEFF] 22.7463  
[P] A woman with a black shirt and wearing a red bandanna is dancing.  
[H] A woman is wearing clothes.

[LABEL] entailment [PRED] entailment [COEFF] 20.1899  
[P] A clown with a red nose and theatrical makeup is wearing a colorful striped shirt and squirting water out of his eye.  
[H] The clown is wearing clothes.

[LABEL] entailment [PRED] entailment [COEFF] 19.7070  
[P] Two children wearing black t - shirts that say jazz with saxophones.  
[H] Two kids are wearing clothes.

[LABEL] entailment [PRED] entailment [COEFF] 19.5429  
[P] A man dressed in a military uniform gets a kiss on the cheek from a woman in a blue dress.  
[H] A man is wearing clothes.

[LABEL] entailment [PRED] entailment [COEFF] 19.5118  
[P] A young boy wearing a blue shirt cooking in the kitchen  
[H] A young boy is wearing clothes.

[LABEL] entailment [PRED] entailment [COEFF] 16.5935  
[P] A man in a black vest and blue jeans is rollerskating.  
[H] A man with clothes.

[LABEL] neutral [PRED] entailment [COEFF] 15.9492

[P] Two women wearing short skirts and high heeled shoes talking to a man.  
[H] Two women are wearing clothes.

### 1.339 Component 338

[LABEL] entailment [PRED] entailment [COEFF] 25.7161

[P] A dark - skinned man is sanding the edge of a column.

[H] The man is near the column.

[LABEL] entailment [PRED] entailment [COEFF] 25.3983

[P] A man with a beard and glasses sits holding a small child.

[H] The man is near the child.

[LABEL] entailment [PRED] entailment [COEFF] 24.5165

[P] Two people are sitting around a tree and one man is posing by the tree.

[H] People are near the tree.

[LABEL] entailment [PRED] entailment [COEFF] 22.2995

[P] A dark - haired man in a green shirt is playing the drums with a bass player in the background.

[H] The man is near the drums.

[LABEL] entailment [PRED] entailment [COEFF] 21.8849

[P] A person in a red hat and shoes doing stunts on a red bike while a person in yellow watches.

[H] A person is near a bike.

[LABEL] entailment [PRED] entailment [COEFF] 21.5272

[P] Two older men and a young woman sit on a bench with a triangle and two half spheres making up the top of the bench.

[H] The men and woman are near a bench.

[LABEL] entailment [PRED] entailment [COEFF] 21.3640

[P] A man is walking with two donkeys and one donkey is carrying a heavy load.

[H] The man is near the donkeys.

[LABEL] entailment [PRED] entailment [COEFF] 19.9236

[P] A man is pushing a cart down the beach.

[H] A man is near the beach.

[LABEL] entailment [PRED] entailment [COEFF] 19.4721

[P] A person hangs from a rope on a cliff

[H] A person is near a cliff.

[LABEL] entailment [PRED] entailment [COEFF] 18.9745

[P] A man is at a microphone entertaining a crowd of people

[H] A man is near a crowd

[LABEL] **entailment** [PRED] **entailment** [COEFF] 18.9371  
[P] A man wearing colorful clothing and white sunglasses is playing a large drum with his hands.  
[H] The man is near a drum.

[LABEL] **entailment** [PRED] **entailment** [COEFF] 18.5495  
[P] A young girl in a pink and yellow bathing suit jumps from a diving board into a pool.  
[H] The girl is near a swimming pool.

[LABEL] **entailment** [PRED] **entailment** [COEFF] 18.2001  
[P] A woman sitting by a pool with her feet in the water.  
[H] A woman is near the pool

[LABEL] **entailment** [PRED] **entailment** [COEFF] 17.4954  
[P] An emergency exit map hangs above a doorway where a woman reaches up for something.  
[H] A woman is near a doorway.

[LABEL] **entailment** [PRED] **entailment** [COEFF] 17.3129  
[P] A man wearing glasses and a blue jacket is smiling while men behind him are cooking on a grill.  
[H] The men are near a grill.

[LABEL] **entailment** [PRED] **entailment** [COEFF] 16.9881  
[P] A person in sarong walks toward several blue outdoor umbrellas while carrying a tan bag.  
[H] The person is near umbrellas.

### 1.340 Component 339

[LABEL] **contradiction** [PRED] **contradiction** [COEFF] 16.3235  
[P] A man in sunglasses with a brown coat is smoking a cigarette and scratches his nose as patrons purchase items from a street stand.  
[H] A man with sunglasses is riding a bike.

[LABEL] **contradiction** [PRED] **contradiction** [COEFF] 14.6850  
[P] A dog runs behind another at a park.  
[H] A circus train passes through the small town.

[LABEL] **contradiction** [PRED] **contradiction** [COEFF] 14.0737  
[P] The houston texans quarterback is executing a play - action play with the running back against the nfc north - worst minnesota vikings, who are big rivals with the elite green bay packers.  
[H] The new york yankees are playing a baseball game against the giants.

[LABEL] **contradiction** [PRED] **contradiction** [COEFF] 13.8008  
[P] A woman is a little scared because a bird landed on her shoulder while she was in the warehouse.  
[H] The woman is at the park with her children.

[LABEL] **contradiction** [PRED] **contradiction** [COEFF] 13.7003  
[P] Two kids with helmets playing with nerf swords while one looks on drinking from a plastic cup.  
[H] The children are racing on bicycles.

[LABEL] contradiction [PRED] contradiction [COEFF] 12.6013

[P] An asian girl makes a surprised face while wearing a shirt that says " radio "

[H] There is a man in a shirt that says " video " who looks menacing.

[LABEL] contradiction [PRED] contradiction [COEFF] 12.5964

[P] A guy is holding a girl, while another rests on his shoulder on a metro train.

[H] A group is in a house.

[LABEL] contradiction [PRED] contradiction [COEFF] 12.0723

[P] There is a little girl in pink being helped by three different adults as she makes something from dough and red dye.

[H] A girl is eating alone.

[LABEL] contradiction [PRED] contradiction [COEFF] 11.9012

[P] An ice climber wearing an orange helmet is hacking the ice with his ice pick.

[H] A rock climber with a green helmet uses only a rope.

[LABEL] contradiction [PRED] contradiction [COEFF] 11.8772

[P] A blond boy getting his hair done.

[H] A dark haired boy is skiing.

[LABEL] contradiction [PRED] contradiction [COEFF] 11.5988

[P] Black man in a nice suite that matches the rest of the choir he's singing with near a piano.

[H] A rock band plays metal music wearing suits.

[LABEL] contradiction [PRED] contradiction [COEFF] 11.4483

[P] A basketball player is attempting to make a basket when an opposing player attempts to block his shot.

[H] Two people are riding in a vehicle.

[LABEL] contradiction [PRED] contradiction [COEFF] 11.1084

[P] The two mother is walking bringing their kid.

[H] A man steals a kid

[LABEL] contradiction [PRED] contradiction [COEFF] 11.0130

[P] Two men rehearsing, one wearing a checker broad sweater and the other playing a orange guitar.

[H] Two men playing the trumpet rehearse.

[LABEL] contradiction [PRED] contradiction [COEFF] 10.9146

[P] A middle - eastern street vendor sells drinks to some young boys.

[H] Young boys are playing soccer.

[LABEL] contradiction [PRED] contradiction [COEFF] 10.8359

[P] During a baseball game, one player is diving on the ground to reach the base in time.

[H] The people here are playing golf.

### 1.341 Component 340

[LABEL] contradiction [PRED] contradiction [COEFF] 8.4422

[P] A man wearing a long blue robe and black pants crouches beside two travel bags to play a black and gold studded stringed instrument on a cobblestone sidewalk.

[H] A man is swimming.

[LABEL] contradiction [PRED] contradiction [COEFF] 8.2301

[P] A black dog is running over rocky ground under a cloudy blue sky.

[H] A dog is swimming.

[LABEL] contradiction [PRED] contradiction [COEFF] 8.0716

[P] People looking at a car exhibit.

[H] The people are swimming.

[LABEL] contradiction [PRED] contradiction [COEFF] 7.9616

[P] A group of people are at a rock concert.

[H] A group of people are swimming,

[LABEL] contradiction [PRED] contradiction [COEFF] 7.8081

[P] A young boy wearing a t - shirt and jeans is walking in a grassy field.

[H] The boy is swimming.

[LABEL] contradiction [PRED] contradiction [COEFF] 7.2494

[P] Two men are running in some sort of marathon, one man pauses while running to wipe the sweat from his face.

[H] The men are swimming.

[LABEL] contradiction [PRED] contradiction [COEFF] 7.2294

[P] A group of rollerskaters in protective gear skates in a ring.

[H] People are swimming.

[LABEL] contradiction [PRED] contradiction [COEFF] 7.1689

[P] A man digging dirt with a case machine.

[H] He is swimming.

[LABEL] contradiction [PRED] contradiction [COEFF] 7.1511

[P] A zookeeper working with a white tiger who is climbing a tree.

[H] The white tiger is swimming.

[LABEL] contradiction [PRED] contradiction [COEFF] 7.0419

[P] Two men are squatting with one man lighting a stick from a candle flame and the other man has his hands folded looking at the ground while a person wearing a bracelet has a phone to their ear.

[H] The people are swimming

[LABEL] contradiction [PRED] contradiction [COEFF] 6.7250

[P] A priest on the phone near some female military workers taking a break.

[H] The person is swimming.

[LABEL] **contradiction** [PRED] **contradiction** [COEFF] 6.6891  
[P] A man in a white shirt and gray pants is working in an outdoor clothing store.  
[H] The man is swimming.

[LABEL] **contradiction** [PRED] **contradiction** [COEFF] 6.6797  
[P] Two black dogs run in the snow in a field of dry grass.  
[H] Two black dogs are swimming.

[LABEL] **contradiction** [PRED] **contradiction** [COEFF] 6.6194  
[P] A man on a skateboard  
[H] A man is swimming.

[LABEL] **contradiction** [PRED] **contradiction** [COEFF] 6.2723  
[P] Dog running along a dirt path.  
[H] Dog swimming.

[LABEL] **contradiction** [PRED] **contradiction** [COEFF] 6.0405  
[P] People are walking and looking something.  
[H] People are swimming.

### 1.342 Component 341

[LABEL] **entailment** [PRED] **entailment** [COEFF] 30.1763  
[P] A group of motorcycle riders gather on a street.  
[H] Some people are gathered outside.

[LABEL] **entailment** [PRED] **entailment** [COEFF] 28.2836  
[P] Two people wearing helmets and blue outfits are in the woods riding their bikes and doing stunts, while another person in blue sits on the side and watch.  
[H] A group of people are outside.

[LABEL] **entailment** [PRED] **entailment** [COEFF] 27.8384  
[P] A red - haired woman in a white and purple outfit walks past a red sports car.  
[H] There is a woman outside.

[LABEL] **entailment** [PRED] **entailment** [COEFF] 27.7716  
[P] Two smaller dogs and one larger dog with a puffy white tail are playing in a field.  
[H] A couple of dogs are outside

[LABEL] **entailment** [PRED] **entailment** [COEFF] 26.2914  
[P] Bearded man with coat and hat standing on a lit street at night.  
[H] There is a man outside.

[LABEL] **entailment** [PRED] **entailment** [COEFF] 26.1002  
[P] A white male entertainer on the street wearing a black shirt and blue hat with a yellow stripe.  
[H] A man is outside



[LABEL] entailment [PRED] entailment [COEFF] 25.8750

[P] A dog in a field.

[H] There is an animal outside.

[LABEL] entailment [PRED] entailment [COEFF] 25.1569

[P] A white dog running in the snow

[H] There is an animal outside.

[LABEL] entailment [PRED] entailment [COEFF] 24.3495

[P] A bunch of people outdoors and some of them are wearing hard hats.

[H] There are people outside.

[LABEL] entailment [PRED] entailment [COEFF] 24.0372

[P] Two guys in jackets on the beach are making signs.

[H] Some people outside.

[LABEL] entailment [PRED] entailment [COEFF] 23.6772

[P] A black and tan dog standing in a field near trees

[H] There is a dog outside.

[LABEL] entailment [PRED] entailment [COEFF] 23.5173

[P] The black dog is standing on the grass at night.

[H] There is an animal outside.

[LABEL] entailment [PRED] entailment [COEFF] 21.6646

[P] Five people sand on the street and looking over to the side.

[H] Some people outside.

[LABEL] entailment [PRED] entailment [COEFF] 21.0861

[P] People are riding motorized vertical scooters down the street.

[H] There are people outside riding somewhere.

[LABEL] entailment [PRED] entailment [COEFF] 20.9937

[P] One man bends over to pick something up while another man scratches his head in a yard.

[H] Some men are outside.

[LABEL] entailment [PRED] entailment [COEFF] 20.7187

[P] A boy in a white shirt and green helmet is riding a skateboard down some steps.

[H] The boy is skateboarding outside.

### 1.343 Component 342

[LABEL] entailment [PRED] entailment [COEFF] 24.6777

[P] A man in a green scarf is bearing his teeth.

[H] There is a man with a green scarf.

[LABEL] entailment [PRED] entailment [COEFF] 21.4826  
[P] A person wearing slacks and a backpack climbs a ladder up the side of the rock face of a gorge.  
[H] There is a person wearing slacks and a backpack climbing a ladder.

[LABEL] entailment [PRED] entailment [COEFF] 20.4511  
[P] A man in a yellow shirt is sitting on a motorcycle.  
[H] There is a man in a yellow shirt.

[LABEL] entailment [PRED] entailment [COEFF] 19.4971  
[P] A woman with an umbrella and other people walking on a street.  
[H] There is a woman with an umbrella and other people walking on a street.

[LABEL] entailment [PRED] entailment [COEFF] 19.1870  
[P] A young child rides a motorbike through the mud.  
[H] There is a young child riding a motorbike.

[LABEL] entailment [PRED] entailment [COEFF] 18.7153  
[P] A man in a green shirt and white shorts is making pancakes for breakfast.  
[H] There is a man in a green shirt and white shorts.

[LABEL] entailment [PRED] entailment [COEFF] 17.5549  
[P] A child standing outside in a matching cap and scarf.  
[H] There is a child standing outside in a matching cap and scarf.

[LABEL] entailment [PRED] entailment [COEFF] 17.4350  
[P] A man in a gray shirt standing.  
[H] There is a man in a gray shirt.

[LABEL] entailment [PRED] entailment [COEFF] 16.7160  
[P] A woman in a blue sweater is sitting on a bench next to a tree.  
[H] There is a woman sitting on a bench wearing a blue sweater

[LABEL] entailment [PRED] entailment [COEFF] 16.6472  
[P] A little boy in brown pants is playing on ropes at a park.  
[H] There is a little boy in brown pants.

[LABEL] entailment [PRED] entailment [COEFF] 16.5954  
[P] A skier climbs up a snowy trail toward his poles.  
[H] There is a skier climbing up a snowy trail towards his poles.

[LABEL] entailment [PRED] entailment [COEFF] 16.5772  
[P] A man in a blue shirt and gray pants stands staring.  
[H] There is a man in a blue shirt and gray pants staring.

[LABEL] entailment [PRED] entailment [COEFF] 16.0521  
[P] A man stands on his motorcycle while doing a wheelie.

[H] There is a man on a motorcycle

[LABEL] **entailment** [PRED] **entailment** [COEFF] 15.3729

[P] A man in his native dress standing in the street.

[H] There is a man in his native dress.

[LABEL] **entailment** [PRED] **entailment** [COEFF] 15.3030

[P] A young boy in a long - sleeved sweatshirt is standing in front of a red tractor, on the grass.

[H] There is a young boy in a long - sleeved sweatshirt.

[LABEL] **entailment** [PRED] **entailment** [COEFF] 15.2414

[P] A man with a tall glass of water sitting at a table looking at his phone at a eating place.

[H] There is a man sitting at a table.

### 1.344 Component 343

[LABEL] **contradiction** [PRED] **contradiction** [COEFF] 10.2856

[P] A red - haired woman sits on a couch with her legs crossed.

[H] A red - haired woman is riding a bike

[LABEL] **contradiction** [PRED] **contradiction** [COEFF] 7.4116

[P] Four young men in room surrounded by books.

[H] The 4 men are riding bicycles on a trail.

[LABEL] **contradiction** [PRED] **contradiction** [COEFF] 7.3915

[P] A man with a gray cap is holding a hand tool above a rusted metal surface.

[H] The man is riding a horse.

[LABEL] **contradiction** [PRED] **contradiction** [COEFF] 7.1184

[P] A group of women lounge on towels on beautiful green grass on a sunny day.

[H] The man is riding a bike.

[LABEL] **contradiction** [PRED] **contradiction** [COEFF] 6.9108

[P] A small child dressed in green is eating with a spoon.

[H] A child is riding a bike.

[LABEL] **contradiction** [PRED] **contradiction** [COEFF] 6.4155

[P] A woman with holding a young girl playing with bubbles at a picnic.

[H] The boys are riding their motorcycles.

[LABEL] **contradiction** [PRED] **contradiction** [COEFF] 6.3059

[P] A woman holding a pink balloon and wearing a fuzzy pink tiara, and a man with his head tilted slightly forward and smiling with his mouth wide open are standing next to one another.

[H] The man is riding a horse.

[LABEL] **contradiction** [PRED] **contradiction** [COEFF] 5.9225

[P] People getting sprayed by a fountain in a city

[H] People are out on a farm riding horses.

[LABEL] **contradiction** [PRED] **contradiction** [COEFF] 5.8317

[P] The blond girl is holding something from a plant.

[H] The blond girl is riding a bicycle

[LABEL] **contradiction** [PRED] **contradiction** [COEFF] 5.4101

[P] A man and woman share a meal at a table.

[H] The two people are jogging on treadmills.

[LABEL] **contradiction** [PRED] **contradiction** [COEFF] 5.3857

[P] Three kids palying with a toy cat in a garden.

[H] Three kids are riding bikes.

[LABEL] **contradiction** [PRED] **contradiction** [COEFF] 5.3369

[P] Two little girls sitting on the edge of a street eating corn on the cob.

[H] Girls riding on horseback.

[LABEL] **contradiction** [PRED] **contradiction** [COEFF] 5.0630

[P] Baseball player in red shirt slides into a base, as another player in blue tags him.

[H] The men are racing motorcycles.

[LABEL] **contradiction** [PRED] **contradiction** [COEFF] 5.0600

[P] A middle - aged woman is holding a baby.

[H] A woman is riding a bicycle.

[LABEL] **contradiction** [PRED] **contradiction** [COEFF] 5.0095

[P] A child running outside with a bright colored ball next to her.

[H] The boy is riding a bike.

[LABEL] **contradiction** [PRED] **contradiction** [COEFF] 4.8921

[P] A man in sunglasses with a brown coat is smoking a cigarette and scratches his nose as patrons purchase items from a street stand.

[H] A man with sunglasses is riding a bike.

## 1.345 Component 344

[LABEL] **contradiction** [PRED] **contradiction** [COEFF] 12.1029

[P] Young girl in blue dress stepping over a soccer ball.

[H] A boy is playing with a bat.

[LABEL] **contradiction** [PRED] **contradiction** [COEFF] 11.9596

[P] A girl in a blue and purple dress is hanging on a railing near a street while holding candy.

[H] A boy is holding a popsicle.

[LABEL] contradiction [PRED] contradiction [COEFF] 11.9378  
[P] A girl wearing a black shirt is in mid - jump on a patio area on a sunny day.  
[H] A boy is outside.

[LABEL] contradiction [PRED] contradiction [COEFF] 11.7639  
[P] A group of girls high - five each other outside of a stone building.  
[H] A boy is playing ball outside.

[LABEL] contradiction [PRED] contradiction [COEFF] 10.6466  
[P] A young girl in a pink shirt creates a painting on paper.  
[H] A boy plays the guitar.

[LABEL] contradiction [PRED] contradiction [COEFF] 10.4889  
[P] A young girl in a pink sweatshirt reading a book while being surrounded by clutter.  
[H] A boy is playing with a toy

[LABEL] contradiction [PRED] contradiction [COEFF] 10.4222  
[P] A young asian girl, with a black, carnegie mellon sweatshirt, is walking and listening to music through white earbuds.  
[H] A boy is doing his homework in class.

[LABEL] contradiction [PRED] contradiction [COEFF] 10.4078  
[P] Young women with a green beanie bending down to pick up a basket from a four legged desk.  
[H] A boy is playing checkers.

[LABEL] contradiction [PRED] contradiction [COEFF] 10.1084  
[P] A girl sits on the side of a large mountain with one leg hanging off.  
[H] A boy is blowing bubbles on the sidewalk.

[LABEL] contradiction [PRED] contradiction [COEFF] 10.0656  
[P] A girl in a orange shirt and a stripe tie  
[H] An older boy is playing in the mud

[LABEL] contradiction [PRED] contradiction [COEFF] 9.8042  
[P] A small blond girl sits in bed looking at book that has the words " crash! bang! boom! " on the front of it while she holds a cup in her other hand.  
[H] A large boy is listening to music in his room.

[LABEL] contradiction [PRED] contradiction [COEFF] 9.5387  
[P] A young girl with a green t - shirt and blond - hair.  
[H] A boy is sitting on a bench.

[LABEL] contradiction [PRED] contradiction [COEFF] 9.2974  
[P] The little girl in her bathing suit stands near the sprinklers and squeals.  
[H] A little boy stands near the sprinklers and squeals.

[LABEL] contradiction [PRED] contradiction [COEFF] 9.2951

[P] A little girl in a pink cowgirl hat and blue cast over her arm, is walking a sheep.  
[H] A boy milks a cow.

[LABEL] **contradiction** [PRED] **contradiction** [COEFF] 9.2798

[P] A little girl in a checkered dress plays with her big blue ball near a mesh fence.  
[H] A boy plays with his truck

[LABEL] **contradiction** [PRED] **contradiction** [COEFF] 9.2535

[P] A little girl hugging a huge egg  
[H] The boy is throwing the ball.

### 1.346 Component 345

[LABEL] **entailment** [PRED] **entailment** [COEFF] 7.4078

[P] A woman wearing a black shirt and blue jeans standing on a sidewalk  
[H] A woman stands on a sidewalk.

[LABEL] **entailment** [PRED] **entailment** [COEFF] 7.2843

[P] Man in black jacket and baseball cap juggling on a street.  
[H] A man is juggling on a street.

[LABEL] **entailment** [PRED] **entailment** [COEFF] 6.9749

[P] A man in a white long-sleeve shirt and black pants is walking on the sidewalk.  
[H] A man walks on a sidewalk.

[LABEL] **entailment** [PRED] **entailment** [COEFF] 6.7908

[P] Man with white flowing beard in jeans and t - shirt riding a bike.  
[H] A man rides a bike.

[LABEL] **entailment** [PRED] **entailment** [COEFF] 6.1868

[P] A girl in green pants and a patterned top is sitting on some steps.  
[H] A girl is sitting on some steps.

[LABEL] **entailment** [PRED] **entailment** [COEFF] 6.1006

[P] A blond girl in a blue shirt and pants riding a red bike.  
[H] A girl riding a red bike.

[LABEL] **neutral** [PRED] **entailment** [COEFF] 5.8227

[P] A man in a green shirt and beige cap is standing in a household.  
[H] A man is standing in household

[LABEL] **entailment** [PRED] **entailment** [COEFF] 5.4154

[P] A man wearing a blue shirt and dark pants is riding a bicycle and is approaching an intersection.  
[H] A man is riding bike.

[LABEL] **entailment** [PRED] **entailment** [COEFF] 5.3073

[P] A woman in a black dress walks down the street.

[H] A woman walks down the street.

[LABEL] **entailment** [PRED] **entailment** [COEFF] 5.2227

[P] A woman in a navy blue shirt and jeans stands in front of a metal building, her hand resting on a fence, with her black and white dog lying in front of her.

[H] A woman is standing in front of a building

[LABEL] **entailment** [PRED] **entailment** [COEFF] 5.1830

[P] A lady in an orange coat and tan pants sweeps the street.

[H] There is a lady sweeping the street.

[LABEL] **entailment** [PRED] **entailment** [COEFF] 5.1108

[P] Three men, one in a red and white shirt, are sitting together.

[H] Three men are sitting together.

[LABEL] **entailment** [PRED] **entailment** [COEFF] 5.1026

[P] Woman with tattoos and long, flowing red dyed hair, sitting on sidewalk.

[H] There is a woman sitting on the sidewalk.

[LABEL] **entailment** [PRED] **entailment** [COEFF] 5.0877

[P] A man with a dark jacket, shirt, and pants, standing near a grill with one hand holding the handle of the grill's lid.

[H] A man is near the grill.

[LABEL] **entailment** [PRED] **entailment** [COEFF] 5.0647

[P] A woman in a dark skirt and red short - sleeve shirt with a beige handbag and sandals is walking over a glass walled walkway.

[H] A lady is walking over a walkway

[LABEL] **entailment** [PRED] **entailment** [COEFF] 5.0025

[P] A man in a blue shirt and shorts is surfing in the ocean.

[H] A man is surfing on the ocean.

### 1.347 Component 346

[LABEL] **entailment** [PRED] **entailment** [COEFF] 34.3675

[P] Three people are walking on a lake shore with houses on the other side.

[H] A group of people are walking by the lake.

[LABEL] **entailment** [PRED] **entailment** [COEFF] 28.7670

[P] Six people standing behind a fence.

[H] A group of people is near a fence.

[LABEL] **entailment** [PRED] **entailment** [COEFF] 27.4776

[P] Four kids are crossing a river by stepping stones

[H] A group of kids are walking across a river.

[LABEL] entailment [PRED] entailment [COEFF] 25.6338  
[P] Five young boys in blue shirts are writing in notebooks at a table.  
[H] A group of boys are writing at the table.

[LABEL] entailment [PRED] entailment [COEFF] 24.8891  
[P] Eleven children wearing coats of all colors are jumping in the air with mountains and a cloudy sky in the background.  
[H] A group of children are wearing coats and jumping.

[LABEL] entailment [PRED] entailment [COEFF] 24.2621  
[P] Three people doing push - ups  
[H] A group of people do push - ups.

[LABEL] entailment [PRED] entailment [COEFF] 24.2595  
[P] Four men do repair work on a roof.  
[H] A group of men repair a roof.

[LABEL] entailment [PRED] entailment [COEFF] 22.4819  
[P] Three girls dancing on the hardwood floor on an empty room.  
[H] There are group of dancing girls

[LABEL] entailment [PRED] entailment [COEFF] 21.4916  
[P] Four boys are in the living room talking.  
[H] A group of boys are talking with each other.

[LABEL] entailment [PRED] entailment [COEFF] 21.0915  
[P] Four people wait by the side of the road, with a wall covered in chinese or japanese characters behind them.  
[H] A group of people stand by the side of the road.

[LABEL] entailment [PRED] entailment [COEFF] 19.5665  
[P] Six people riding a roller coaster.  
[H] A group of people are riding a roller coaster.

[LABEL] entailment [PRED] entailment [COEFF] 19.2271  
[P] There are five people, one lady in green shirt and a tv in background  
[H] A group of people with their tv in the background.

[LABEL] entailment [PRED] entailment [COEFF] 18.8736  
[P] 4 guys in army fatigue walking down street  
[H] A group of men are walking down the road.

[LABEL] entailment [PRED] entailment [COEFF] 17.9456  
[P] Row of people sitting at a bar stool table looking out a glass wall.  
[H] A group of people are sitting down.



[LABEL] entailment [PRED] entailment [COEFF] 17.9436  
[P] A crowd of people stand outside a building in the dark.  
[H] A group of people stand outside.

[LABEL] entailment [PRED] entailment [COEFF] 17.7666  
[P] A bunch of people drinking at a bar in a club.  
[H] A group of people are at a bar.

### 1.348 Component 347

[LABEL] contradiction [PRED] contradiction [COEFF] 16.5648  
[P] A group of children are standing and talking together under trees.  
[H] Children are sitting quietly in the desert.

[LABEL] contradiction [PRED] contradiction [COEFF] 13.8234  
[P] A woman is resting against a cross shaped pole while looking towards a large body of water.  
[H] The woman is in a desert.

[LABEL] contradiction [PRED] contradiction [COEFF] 13.5632  
[P] An old man wearing yellow t - shirt is doing something over the sea.  
[H] The man is in the desert.

[LABEL] contradiction [PRED] contradiction [COEFF] 12.3284  
[P] A ceremonial parade being held is passing over a street corner by the bay.  
[H] The parade was in the desert.

[LABEL] contradiction [PRED] contradiction [COEFF] 12.0265  
[P] A plane is taxiing next to some water  
[H] The plane has landed in an arid desert.

[LABEL] contradiction [PRED] contradiction [COEFF] 10.8681  
[P] Dirty car in body of water  
[H] The clean car was in the desert.

[LABEL] contradiction [PRED] contradiction [COEFF] 10.6155  
[P] The camper opens up to see snow all around.  
[H] A camper is in the gobi desert

[LABEL] contradiction [PRED] contradiction [COEFF] 9.3302  
[P] The biker is riding down a grassy mountainside.  
[H] A biker was in the desert.

[LABEL] contradiction [PRED] contradiction [COEFF] 9.2009  
[P] A dog in a snowy area.  
[H] A dog in the desert

[LABEL] contradiction [PRED] contradiction [COEFF] 8.7070

[P] A child is looking at an angel made in the snow.

[H] The child lives in the desert.

[LABEL] contradiction [PRED] contradiction [COEFF] 8.6257

[P] A man holding a can in a waterfall.

[H] The man is in the desert.

[LABEL] contradiction [PRED] contradiction [COEFF] 8.5765

[P] A dog in the snow.

[H] A dog is in the desert

[LABEL] contradiction [PRED] contradiction [COEFF] 7.9896

[P] A rocky land - mass extends into the water in the distance.

[H] The rocky land - mass protrudes up from the arid desert below.

[LABEL] contradiction [PRED] contradiction [COEFF] 7.9750

[P] Two old men wearing winter coat walking through woods.

[H] The men are walking through the desert.

[LABEL] contradiction [PRED] contradiction [COEFF] 7.3139

[P] The man is in silhouette while the mountain landscape is visible.

[H] A man is looking at the flat desert.

[LABEL] contradiction [PRED] contradiction [COEFF] 7.0068

[P] A man wearing a red life vest waves as he waterskiis.

[H] A man is crawling across a desert.

### 1.349 Component 348

[LABEL] contradiction [PRED] contradiction [COEFF] 24.9943

[P] A man in a suit runs across an intersection while a large group of people assembles.

[H] A man is standing alone by an intersection.

[LABEL] contradiction [PRED] contradiction [COEFF] 17.7334

[P] A boy is pulling the ears of his friend who sits in front of him.

[H] A boy is sitting alone.

[LABEL] contradiction [PRED] contradiction [COEFF] 17.1897

[P] An adult and a child walking in front of a circle building.

[H] A building stands alone.

[LABEL] contradiction [PRED] contradiction [COEFF] 15.7385

[P] A man sings with his band up on stage at an event or concert late at night.

[H] A man dances alone in his room.

[LABEL] contradiction [PRED] contradiction [COEFF] 15.3019

[P] A man is holding a yellow bird cage with a parrot inside.

[H] A man with an empty bird cage.

[LABEL] contradiction [PRED] contradiction [COEFF] 15.2742

[P] An asian man and woman are facing each other and making angry faces.

[H] One person is alone.

[LABEL] contradiction [PRED] contradiction [COEFF] 15.0829

[P] A lady and a boy who is having ice cream are sitting together.

[H] A boy alone is having ice cream.

[LABEL] contradiction [PRED] contradiction [COEFF] 15.0125

[P] A man in a black shirt is wearing a lime green wristband.

[H] A man is shirtless.

[LABEL] contradiction [PRED] contradiction [COEFF] 14.4840

[P] A man with a pug on a leash bending down to examine merchandise.

[H] A man stands alone while examining merchandise

[LABEL] contradiction [PRED] contradiction [COEFF] 14.1983

[P] A mother sits on a blanket with a child.

[H] A mother sits on a blanket alone.

[LABEL] contradiction [PRED] contradiction [COEFF] 14.0820

[P] A man and woman behind a vegetable stand on a city street with parked vehicles and storefronts in the background.

[H] A man and a woman are standing in an empty street.

[LABEL] contradiction [PRED] contradiction [COEFF] 13.7372

[P] A woman clothed in a top and flowing white skirt is caught mid leap while dancing in a near a fountain.

[H] A woman is alone inside the building.

[LABEL] contradiction [PRED] contradiction [COEFF] 13.3884

[P] A teenage boy with a red hat sits along side a pedestrian bridge while people walk by.

[H] A teenage boy jogs through a park alone.

[LABEL] entailment [PRED] contradiction [COEFF] 13.1615

[P] A kid playing in the playground

[H] A kid is alone.

[LABEL] contradiction [PRED] contradiction [COEFF] 13.0176

[P] Asian woman holding young asian girl.

[H] Asian woman alone.

[LABEL] contradiction [PRED] contradiction [COEFF] 12.9904

[P] A group of people hanging out and playing a board game.

[H] A person is playing indoors alone

### 1.350 Component 349

[LABEL] **neutral** [PRED] **neutral** [COEFF] 49.3734

[P] One girl throws water on another in a pool.

[H] One sad girl throws water on another in a pool.

[LABEL] **neutral** [PRED] **neutral** [COEFF] 45.5787

[P] A man in a black shirt and jeans is purchasing food from a counter.

[H] A sad man in a black shirt and jeans is purchasing food from a counter.

[LABEL] **neutral** [PRED] **neutral** [COEFF] 43.5004

[P] A boy is fixing the wheel of his bike.

[H] A sad boy is fixing the wheel of his bike.

[LABEL] **neutral** [PRED] **neutral** [COEFF] 43.0845

[P] Boy in blue shirt climbing a fence.

[H] Sad boy in blue shirt climbing a fence.

[LABEL] **neutral** [PRED] **neutral** [COEFF] 40.8623

[P] A man is helping a little boy learn how to ride a bicycle.

[H] A sad man is helping a little boy learn how to ride a bicycle.

[LABEL] **neutral** [PRED] **neutral** [COEFF] 40.4378

[P] A man is near a park bench in front of a nice lawn.

[H] A sad man is near a park bench in front of a nice lawn.

[LABEL] **neutral** [PRED] **neutral** [COEFF] 40.3914

[P] A man in a black swim trunk doing a flip cannonball.

[H] A sad man in a black swim trunk doing a flip cannonball.

[LABEL] **neutral** [PRED] **neutral** [COEFF] 39.7939

[P] A group of women all dressed in red with yellow flower pins.

[H] A group of sad women all dressed in red with yellow flower pins.

[LABEL] **neutral** [PRED] **neutral** [COEFF] 39.0580

[P] A man surfing a small wave and another man on a surfboard paddling toward it.

[H] A sad man surfing a small wave and another man on a surfboard paddling toward it.

[LABEL] **neutral** [PRED] **neutral** [COEFF] 36.2022

[P] A boy standing in front of a multicolored statue.

[H] A sad boy standing in front of a multicolored statue.

[LABEL] **neutral** [PRED] **neutral** [COEFF] 35.5720

[P] A girl in a harness and cords for jumping.

[H] A sad girl in a harness and cords for jumping.

[LABEL] **neutral** [PRED] **neutral** [COEFF] 34.0718

[P] A girl jumping in front of a jukebox mural.

[H] A sad girl jumping in front of a jukebox mural.

[LABEL] **neutral** [PRED] **neutral** [COEFF] 33.7370

[P] A view through a doorway of a man shoveling dirt into a wheelbarrow.

[H] A view through a doorway of a sad man shoveling dirt into a wheelbarrow.

[LABEL] **neutral** [PRED] **neutral** [COEFF] 32.3351

[P] Guy juggling three yellow balls whose is wearing a shirt with the word love on it

[H] Sad guy juggling three yellow balls whose is wearing a shirt with the word love on it

[LABEL] **neutral** [PRED] **neutral** [COEFF] 30.8897

[P] The man with the guitar kicking up his right leg as he play his guitar.

[H] The sad man with the guitar kicking up his right leg as he play his guitar.

[LABEL] **neutral** [PRED] **neutral** [COEFF] 30.1405

[P] A man in a suit passes a woman in dress clothes in a grassy area.

[H] A sad man in a suit passes a woman in dress clothes in a grassy area.

### 1.351 Component 350

[LABEL] **contradiction** [PRED] **contradiction** [COEFF] 36.3733

[P] Two people having a conversation outdoors.

[H] Three people having a conversation outdoors.

[LABEL] **entailment** [PRED] **contradiction** [COEFF] 35.5349

[P] Two white dogs are playing with a brown dog and a ball.

[H] Three dogs are playing with a ball.

[LABEL] **contradiction** [PRED] **contradiction** [COEFF] 35.0287

[P] Two dogs play ball in a field near a street

[H] Three dogs are laying down in a field near a street.

[LABEL] **contradiction** [PRED] **contradiction** [COEFF] 34.1817

[P] Two people are sitting at work stations.

[H] Three people are sitting at work stations.

[LABEL] **contradiction** [PRED] **contradiction** [COEFF] 29.3977

[P] Two men without shirts are washing a roof.

[H] Three men are washing windows.

[LABEL] **contradiction** [PRED] **contradiction** [COEFF] 27.7854

[P] Two women and a man posing for a photograph.

[H] Three women are posing.

[LABEL] **contradiction** [PRED] **contradiction** [COEFF] 27.3859

[P] Two people play foosball.

[H] Four people are having a match of foosball.

[LABEL] **contradiction** [PRED] **contradiction** [COEFF] 25.1499

[P] Two musicians playing their instruments for an audience.

[H] Four people are playing instruments for others

[LABEL] **contradiction** [PRED] **contradiction** [COEFF] 24.1801

[P] Two men, one in mid flip, perform karate in front of a table of judges.

[H] Three men watching a karate contest.

[LABEL] **contradiction** [PRED] **contradiction** [COEFF] 23.7104

[P] Three men are standing on the bow of a white boat.

[H] There are four men on the boat.

[LABEL] **contradiction** [PRED] **contradiction** [COEFF] 22.5759

[P] Two people stand in front of a lake in the snow and pose for a picture.

[H] Three men are in front of a lake.

[LABEL] **contradiction** [PRED] **contradiction** [COEFF] 22.5141

[P] Two crossing guards wait on a street corner.

[H] There are three guards

[LABEL] **contradiction** [PRED] **contradiction** [COEFF] 22.4598

[P] Two boys in blue clothing are pulling on a rope while one boy is touching a brown chair.

[H] 3 boys are pushing on a chair

[LABEL] **entailment** [PRED] **contradiction** [COEFF] 22.0421

[P] Three people swimming in the water and one person on the sand is running into the water.

[H] Four people are outside

[LABEL] **contradiction** [PRED] **contradiction** [COEFF] 20.6617

[P] A young child plays with a hose in a field with another child, and two adults.

[H] There are four adults in a field.

[LABEL] **contradiction** [PRED] **contradiction** [COEFF] 20.5290

[P] A blurred person on a motorized bicycle while three people are on the right side of the street.

[H] Four people riding a motorbike on a sidewalk.

### 1.352 Component 351

[LABEL] **entailment** [PRED] **entailment** [COEFF] 49.1687

[P] A man on a stage raising his hand and smiling.

[H] A man is smiling.

[LABEL] entailment [PRED] entailment [COEFF] 43.0938

[P] A smiling child in a hat and sweatshirt at the beach.

[H] The child is smiling.

[LABEL] entailment [PRED] entailment [COEFF] 42.4153

[P] Two men holding an oversized check from bollywood dreams for unicef and smiling.

[H] Two men are smiling.

[LABEL] entailment [PRED] entailment [COEFF] 41.8812

[P] A blond - haired woman with a tennis cap and sports tank top is holding up her left hand and smiling.

[H] A woman is smiling.

[LABEL] entailment [PRED] entailment [COEFF] 41.8074

[P] The child with a green shirt is on a bed smiling

[H] A child is smiling

[LABEL] entailment [PRED] entailment [COEFF] 38.9071

[P] A small baby dress in yellow smiles.

[H] The baby is smiling.

[LABEL] entailment [PRED] entailment [COEFF] 37.8466

[P] A blond man shows off his freshly baked bread with a wide smile.

[H] The man is smiling.

[LABEL] entailment [PRED] entailment [COEFF] 36.8745

[P] The lady smiles on a clear day.

[H] The lady is smiling.

[LABEL] entailment [PRED] entailment [COEFF] 36.6480

[P] A young girl squishes her face in a smile for the camera.

[H] The girl is smiling.

[LABEL] entailment [PRED] entailment [COEFF] 36.5427

[P] A young girl smiles for the camera.

[H] A girl is smiling.

[LABEL] entailment [PRED] entailment [COEFF] 35.3419

[P] A guy is real relax in some very tall grass with a big smile on his face.

[H] A guy is smiling.

[LABEL] entailment [PRED] entailment [COEFF] 34.0614

[P] A smiling asian woman holding her baby

[H] The woman is smiling.

[LABEL] entailment [PRED] entailment [COEFF] 31.9909

[P] A man in a dark brown shirt is wearing a bright green hat with the miller logo on it, and smiling.  
[H] A person is smiling.

[LABEL] **entailment** [PRED] **entailment** [COEFF] 31.6347  
[P] An asian cute girl in an ash color outfit with a bag color bag give a beautiful smile.  
[H] The asian girl is smiling.

[LABEL] **entailment** [PRED] **entailment** [COEFF] 31.0294  
[P] A man is wearing a rainbow colored necklace and smiling.  
[H] A person is smiling.

[LABEL] **entailment** [PRED] **entailment** [COEFF] 30.9677  
[P] Two young people smile at the camera while walking their dog.  
[H] Two young people are smiling.

### 1.353 Component 352

[LABEL] **neutral** [PRED] **neutral** [COEFF] 102.7971  
[P] A man wearing an orange shirt with tans shorts and a baseball cap is bent over in a small pit, scooping up pale mud with his hands.  
[H] The man is old.

[LABEL] **neutral** [PRED] **neutral** [COEFF] 98.5554  
[P] A woman in black heels is speaking with another woman wearing large hoop earrings.  
[H] The women are old

[LABEL] **neutral** [PRED] **neutral** [COEFF] 91.9142  
[P] One women in a blue top with blond - hair smiles as she sits among a large group of adults inside a building.  
[H] The woman is old

[LABEL] **neutral** [PRED] **neutral** [COEFF] 89.1713  
[P] Some type of ritual is going on with a man wearing a red headband restraining a girl in a brown shirt.  
[H] The man is old

[LABEL] **neutral** [PRED] **neutral** [COEFF] 86.2777  
[P] A lady is laying on a brown plaid couch.  
[H] The lady is old.

[LABEL] **neutral** [PRED] **neutral** [COEFF] 86.2275  
[P] A janitor dressed in white is using a dust mop to clean a floor.  
[H] The janitor is old

[LABEL] **neutral** [PRED] **neutral** [COEFF] 78.0779  
[P] A woman in black leggings and beige cowboy boots.  
[H] The woman is old



[LABEL] **neutral** [PRED] **neutral** [COEFF] 76.6881

[P] A dog runs and plays in the water.

[H] The dog is old.

[LABEL] **neutral** [PRED] **neutral** [COEFF] 75.8277

[P] A man in a santa suit stands amid a long row of dancers on a new york city street.

[H] The man is very old

[LABEL] **neutral** [PRED] **neutral** [COEFF] 74.0376

[P] Two people in a boat, one a red shirt and one in a green shirt, observe the riverbank as they row along.

[H] The shirt is old.

[LABEL] **neutral** [PRED] **neutral** [COEFF] 73.4732

[P] A man is sitting on a silver scooter.

[H] The man is old

[LABEL] **neutral** [PRED] **neutral** [COEFF] 72.0276

[P] An african american woman in orange and yellow standing next to two brightly colored clowns.

[H] The woman is old.

[LABEL] **neutral** [PRED] **neutral** [COEFF] 68.8877

[P] A couple dressed in black are standing closely and looking at one another in front of a large statue of an urn in a public place.

[H] The couple is old

[LABEL] **neutral** [PRED] **neutral** [COEFF] 65.2455

[P] A woman wearing a white blouse, blue jeans and heels, runs across the street to avoid oncoming traffic.

[H] The blouse is old.

[LABEL] **neutral** [PRED] **neutral** [COEFF] 59.3784

[P] Three guys are waiting to cross the street. one has a dog.

[H] The guys are old

[LABEL] **neutral** [PRED] **neutral** [COEFF] 56.4786

[P] A woman with a basket works in a garden.

[H] The woman is old.

### 1.354 Component 353

[LABEL] **contradiction** [PRED] **contradiction** [COEFF] 26.7878

[P] One man in black is jumping high into the air on his bicycle.

[H] A man is skateboarding on a rail.

[LABEL] **contradiction** [PRED] **contradiction** [COEFF] 23.9488

[P] A person with a blue backpack and a purple helmet rides a bicycle over a narrow bridge.

[H] A person is riding a skateboard.

[LABEL] **contradiction** [PRED] **contradiction** [COEFF] 23.2494

[P] An adult riding a bike on a beach with many visible vapour trails in the sky.

[H] A man is riding his skateboard on the boardwalk.

[LABEL] **contradiction** [PRED] **contradiction** [COEFF] 21.1925

[P] Four children are smiling as they pose together with a bicycle that is much too big for them.

[H] The children are riding skateboards.

[LABEL] **contradiction** [PRED] **contradiction** [COEFF] 20.2989

[P] A person in a black jacket is jumping through the air on a bike.

[H] A person jumps through the air on a skateboard.

[LABEL] **contradiction** [PRED] **contradiction** [COEFF] 18.9877

[P] A man wearing a black helmet, blue jacket, and khaki shirts rides his bike on the street next to a red car.

[H] A young man is skateboarding on the street.

[LABEL] **contradiction** [PRED] **contradiction** [COEFF] 18.7162

[P] A man is competing for a bicycle race while the other cyclists are directly behind him.

[H] A man is skateboarding in front of bicyclists.

[LABEL] **contradiction** [PRED] **contradiction** [COEFF] 18.4362

[P] A person on a red motorcycle is riding down a tree - lined dirt road.

[H] A man on a skateboard going down the street.

[LABEL] **contradiction** [PRED] **contradiction** [COEFF] 18.1299

[P] A biker is doing tricks on his bike.

[H] The person is doing tricks on his skateboard

[LABEL] **contradiction** [PRED] **contradiction** [COEFF] 17.8255

[P] A young man in an elmo t - shirt is flying through the air on a mountain bike in the woods.

[H] A young man in a slayer t - shirt is flying through the air on his skateboard in the woods

[LABEL] **contradiction** [PRED] **contradiction** [COEFF] 16.8719

[P] A man holds a surfboard on the beach.

[H] A man is holding up his skateboard.

[LABEL] **contradiction** [PRED] **contradiction** [COEFF] 16.8648

[P] A girl on a bike stops to look back.

[H] A girl is skateboarding

[LABEL] **contradiction** [PRED] **contradiction** [COEFF] 14.6303

[P] A person is dirt biking over rocks and water.

[H] A man is riding a skateboard.

[LABEL] contradiction [PRED] contradiction [COEFF] 14.5110

[P] The biker is riding through the woods.

[H] A child skateboards in the woods.

[LABEL] contradiction [PRED] contradiction [COEFF] 12.6584

[P] A woman cyclist in a shirt wearing a bike helmet waits with a child passenger at a stop with another woman cyclist wearing a blue shirt and black pants.

[H] One woman is riding a skateboard with a child on the back.

[LABEL] contradiction [PRED] contradiction [COEFF] 11.6737

[P] Two people are riding dirt bikes on a sunny day in a forested area.

[H] The woman rode the skateboard

### 1.355 Component 354

[LABEL] contradiction [PRED] contradiction [COEFF] 7.3080

[P] A brunette man playing rugby.

[H] The person is eating dinner.

[LABEL] contradiction [PRED] contradiction [COEFF] 7.2570

[P] Dressed in his team uniform of yellow and black he plays soccer.

[H] A man in yellow and black is playing billiards.

[LABEL] contradiction [PRED] contradiction [COEFF] 7.2454

[P] A soccer team dressed in blue has control of the soccer ball, while an opposing teammate in red is looking on.

[H] The team is eating pizza at a restaurant.

[LABEL] contradiction [PRED] contradiction [COEFF] 6.7902

[P] A boy is in midair doing a skateboard trick at a skate park while two women and a toddler walk behind him.

[H] They are at a nature park.

[LABEL] contradiction [PRED] contradiction [COEFF] 6.0856

[P] A soccer player in white is about to strike the ball in front of a large crowd as an opponent in red tries to make a play on him.

[H] A man is playing dance dance revolution.

[LABEL] contradiction [PRED] contradiction [COEFF] 5.9828

[P] A woman in a white tennis outfit playing tennis.

[H] The lady in whit is running away

[LABEL] contradiction [PRED] contradiction [COEFF] 5.9807

[P] A group of boys play soccer on a sandy court looking over an urban settlement.

[H] The boys are watching cartoons in the living room.

[LABEL] contradiction [PRED] contradiction [COEFF] 5.9118

[P] A female soccer player throws the ball into play.

[H] A girl is eating cookies.

[LABEL] **contradiction** [PRED] **contradiction** [COEFF] 5.8907

[P] It looks as though a young boy is getting someone on one attention from a martial arts instructor.

[H] The boy is at church singing

[LABEL] **contradiction** [PRED] **contradiction** [COEFF] 5.6965

[P] A young woman midair gets ready for an intense tennis match, her partner walks behind her.

[H] Two woman are playing a bowling video game.

[LABEL] **contradiction** [PRED] **contradiction** [COEFF] 5.6484

[P] Six young kids playing soccer on a sunny day.

[H] Six young kids eating pizza

[LABEL] **contradiction** [PRED] **contradiction** [COEFF] 5.5518

[P] A boy at bat playing a baseball game falls to the ground while onlookers watch.

[H] The game ended when the player played the flute.

[LABEL] **contradiction** [PRED] **contradiction** [COEFF] 5.5062

[P] A group of elderly people playing a game of checkers, in a very poor area.

[H] The elderly people were rowing a boat at the local park.

[LABEL] **contradiction** [PRED] **contradiction** [COEFF] 5.3499

[P] A female tennis player, wearing a red top and green skirt, serves a tennis ball on a grass court.

[H] A woman is playing ice hockey.

[LABEL] **contradiction** [PRED] **contradiction** [COEFF] 5.1869

[P] Ice skating race is going around a curve.

[H] The racers are driving motorcycles.

[LABEL] **contradiction** [PRED] **contradiction** [COEFF] 5.1401

[P] Girls are playing basketball.

[H] The girls are sitting on a couch.

### 1.356 Component 355

[LABEL] **contradiction** [PRED] **contradiction** [COEFF] 2.9725

[P] Two people preparing meat on a street - side grill with one person wearing a mask as the other leans his head down.

[H] Two men are sitting on the couch watching television.

[LABEL] **contradiction** [PRED] **contradiction** [COEFF] 2.9624

[P] A man holding a large chunk of snow over two people on the ground.

[H] The father and the two kids are playing on the beach.

[LABEL] contradiction [PRED] contradiction [COEFF] 2.9189

[P] Woman on grass, cradling small dog as another dog jumps up.

[H] A man and his cat sit on a bed.

[LABEL] contradiction [PRED] contradiction [COEFF] 2.8526

[P] Two young women hold hands near a tree.

[H] Womens dancing on a stage.

[LABEL] contradiction [PRED] contradiction [COEFF] 2.8213

[P] Two men in safety vests walk down the road.

[H] Two people are playing cribbage.

[LABEL] contradiction [PRED] contradiction [COEFF] 2.8209

[P] Young woman in gray shirt and cream sweater eats a hotdog.

[H] A female in a dress is running with a sandwich in her hand.

[LABEL] contradiction [PRED] contradiction [COEFF] 2.7992

[P] A girl dancing in the middle of a group of people in the park.

[H] There is a group of people inside a theater.

[LABEL] contradiction [PRED] contradiction [COEFF] 2.7433

[P] A blue automobile with european license plate, parked under a skinny white umbrella, in front of a crowd of people.

[H] Motorcycle parked in a showroom with various others on sale.

[LABEL] contradiction [PRED] contradiction [COEFF] 2.5957

[P] A woman dressed nicely stands happily with her camera.

[H] A girl underneath a car, changing its oil.

[LABEL] contradiction [PRED] contradiction [COEFF] 2.5536

[P] A group of african girls in colorful clothing sitting indian style on the ground.

[H] There are boys in a room

[LABEL] contradiction [PRED] contradiction [COEFF] 2.5444

[P] A man wrestling with a child on the floor.

[H] Two people are sitting down to dinner.

[LABEL] neutral [PRED] contradiction [COEFF] 2.5134

[P] Three women are inside a bar are all holding drinks in their hands.

[H] Young women are at a restaurant having dinner and holding forks

[LABEL] contradiction [PRED] contradiction [COEFF] 2.4937

[P] A lone bicyclist, a black male, pedals over a sign on the street, showing he is going in the wrong direction.

[H] A girl on a bike rides through the forest

[LABEL] contradiction [PRED] contradiction [COEFF] 2.4692

[P] Kid wearing a paper crown sitting in a shopping cart.

[H] There is a kid whatching tv

[LABEL] **contradiction** [PRED] **contradiction** [COEFF] 2.4538

[P] A man and a woman on bikes are bicycling down a large highway in the trail lane, along with other bikers and joggers.

[H] A man and woman swim in the ocean alongside one another.

[LABEL] **contradiction** [PRED] **contradiction** [COEFF] 2.4418

[P] Two women on green chairs are looking at a book.

[H] There is a women readin a magazine while standing.

### 1.357 Component 356

[LABEL] **entailment** [PRED] **entailment** [COEFF] 16.4283

[P] A young girl scoops sand on a beach using a green toy shovel.

[H] A girl is scooping sand.

[LABEL] **entailment** [PRED] **entailment** [COEFF] 15.0982

[P] A woman collects grass from a water soaked field.

[H] A woman is collecting grass.

[LABEL] **entailment** [PRED] **entailment** [COEFF] 13.2464

[P] A woman scratching her face.

[H] A woman is scratching her face

[LABEL] **entailment** [PRED] **entailment** [COEFF] 12.8185

[P] A man, wearing a black hat, carving a design into wood.

[H] A man is carving a design into wood.

[LABEL] **entailment** [PRED] **entailment** [COEFF] 12.4519

[P] A man puts on some work gloves as people set up tables for an event.

[H] A man is putting on work gloves.

[LABEL] **entailment** [PRED] **entailment** [COEFF] 11.8627

[P] A man in a blue shirt helps a small girl in a pink coat up a hill on a rope.

[H] A man is helping a small girl.

[LABEL] **neutral** [PRED] **entailment** [COEFF] 10.6642

[P] A young girl in a yellow dress and no shoes dancing on the dugout at a baseball game.

[H] The girl is dancing on the dugout during a baseball game.

[LABEL] **entailment** [PRED] **entailment** [COEFF] 10.6145

[P] A tan dog walks down a stream between mounds of snow.

[H] A dog is walking down a stream.

[LABEL] **entailment** [PRED] **entailment** [COEFF] 10.5010  
[P] A baby, holding a toy, cries.  
[H] A baby is crying

[LABEL] **entailment** [PRED] **entailment** [COEFF] 10.4651  
[P] A young girl, wearing a red shirt and with an animal painted face, painting her own picture.  
[H] A girl is painting a picture.

[LABEL] **entailment** [PRED] **entailment** [COEFF] 10.3991  
[P] A man feeds a baby in it's highchair.  
[H] A man is feeding a baby.

[LABEL] **entailment** [PRED] **entailment** [COEFF] 10.2372  
[P] A man in a blue shirt cleaning his pottery equipment.  
[H] The man is cleaning his equipment for pottery.

[LABEL] **entailment** [PRED] **entailment** [COEFF] 10.0011  
[P] A family of all ages sitting on the floor playing a board game.  
[H] A family is playing a board game.

[LABEL] **entailment** [PRED] **entailment** [COEFF] 9.8662  
[P] Young man with no shirt skateboarding off a ramp outdoors.  
[H] A man is skateboarding off a ramp.

[LABEL] **entailment** [PRED] **entailment** [COEFF] 9.7325  
[P] Woman cleans windows in front of store.  
[H] A woman is cleaning windows.

[LABEL] **entailment** [PRED] **entailment** [COEFF] 9.3996  
[P] A group of men bow their heads before a table full of multicolored vegetables.  
[H] Men are bowing their heads.

### 1.358 Component 357

[LABEL] **contradiction** [PRED] **contradiction** [COEFF] 29.9863  
[P] A brown and white dog is running on the grass.  
[H] The dog is black.

[LABEL] **contradiction** [PRED] **contradiction** [COEFF] 26.2742  
[P] A fluffy white dog is coming out of a blue striped obstacle shute.  
[H] The dog is black.

[LABEL] **contradiction** [PRED] **contradiction** [COEFF] 25.2588  
[P] A short - haired brown dog is snapping at a long green strip.  
[H] The dog is black.

[LABEL] contradiction [PRED] contradiction [COEFF] 25.0700

[P] A tan dog is climbing down a pile of concrete rubble.

[H] The dog is black.

[LABEL] contradiction [PRED] contradiction [COEFF] 24.6570

[P] Two white dogs running in grass.

[H] The dogs are black.

[LABEL] contradiction [PRED] contradiction [COEFF] 23.3800

[P] A brown dog and a spotted dog squabble over a dog toy.

[H] The dog is black

[LABEL] contradiction [PRED] contradiction [COEFF] 23.0940

[P] A blue, red, and yellow plane does a loop in the air.

[H] The plane is black.

[LABEL] contradiction [PRED] contradiction [COEFF] 23.0180

[P] A white truck is near the factory entrance.

[H] The truck is black

[LABEL] contradiction [PRED] contradiction [COEFF] 22.9140

[P] A tan dog walks through a field of colorful flowers.

[H] The dog is black.

[LABEL] contradiction [PRED] contradiction [COEFF] 22.5090

[P] The people dressed in all white are having a good time.

[H] The people are dressed in all black.

[LABEL] contradiction [PRED] contradiction [COEFF] 22.4751

[P] A man in a white jacket and helmet does tricks on his bike.

[H] The man's jacket is black.

[LABEL] contradiction [PRED] contradiction [COEFF] 21.4646

[P] A small white dog is jumping over a green and red obstacle bar.

[H] The dog is black

[LABEL] contradiction [PRED] contradiction [COEFF] 21.3555

[P] A man in a white shirt is working on a rooftop.

[H] A man is in a black shirt.

[LABEL] contradiction [PRED] contradiction [COEFF] 21.2699

[P] Woman in a green dress with a white top and red - hair singing in a room with a blue roof while band equipment is being prepared.

[H] The woman has black hair.

[LABEL] contradiction [PRED] contradiction [COEFF] 19.7629

[P] The brown dog with the blue muzzle is in the field.



[H] The dog is black and big.

[LABEL] **contradiction** [PRED] **contradiction** [COEFF] 18.8442

[P] Two men on a dock talk to the passengers arriving in a red boat.

[H] The boat is black.

### 1.359 Component 358

[LABEL] **contradiction** [PRED] **contradiction** [COEFF] 7.3829

[P] Skiers walking up the hill through a forest.

[H] Skiers are running down a mountain.

[LABEL] **contradiction** [PRED] **contradiction** [COEFF] 6.8432

[P] A woman pushing a shopping cart through a supermarket parking lot.

[H] A woman is walking in a park.

[LABEL] **contradiction** [PRED] **contradiction** [COEFF] 6.5364

[P] Three women in hats walk down a sidewalk.

[H] Everybody is in the grass.

[LABEL] **contradiction** [PRED] **contradiction** [COEFF] 6.2984

[P] A man in the city outside a building standing on the steps.

[H] The man is inside a house.

[LABEL] **contradiction** [PRED] **contradiction** [COEFF] 6.2155

[P] A man holding a white sweatshirt stands next to a white car.

[H] A man sits inside a car.

[LABEL] **contradiction** [PRED] **contradiction** [COEFF] 5.9842

[P] A girl wearing a tan shirt and blue shorts smiles while painting.

[H] A girl with a blue shirt frowns while doing the dishes.

[LABEL] **contradiction** [PRED] **contradiction** [COEFF] 5.8341

[P] A man is riding a red racing motorcycle.

[H] A man is pushing a bicycle.

[LABEL] **contradiction** [PRED] **contradiction** [COEFF] 5.5005

[P] A woman is riding her bicycle in traffic

[H] The woman is sitting on the bus

[LABEL] **contradiction** [PRED] **contradiction** [COEFF] 5.4830

[P] The woman in a red jacket is smiling at the camera.

[H] The woman was frowning at the camera.

[LABEL] **contradiction** [PRED] **contradiction** [COEFF] 5.4534

[P] A man kneeling holding a flaming stick.

[H] A man stands, juggling balls.

[LABEL] **contradiction** [PRED] **contradiction** [COEFF] 5.4401

[P] A kid in a white shirt is in a tall tree.

[H] The tree is short

[LABEL] **contradiction** [PRED] **contradiction** [COEFF] 5.4003

[P] People pose for the picture while sitting on a bed.

[H] People are standing on a bed.

[LABEL] **neutral** [PRED] **contradiction** [COEFF] 5.3853

[P] The two people are crossing the river by walking on the rocks.

[H] People running on stones.

[LABEL] **contradiction** [PRED] **contradiction** [COEFF] 5.3393

[P] A person on a skateboard jumps in a curve on the sidewalk.

[H] The person is on a bicycle.

[LABEL] **contradiction** [PRED] **contradiction** [COEFF] 5.3131

[P] An old man and two kids are on the porch looking over the railing

[H] The people are on the stairs.

[LABEL] **contradiction** [PRED] **contradiction** [COEFF] 5.2204

[P] A man, lying on the grass, hand outstretched to another arm.

[H] Man lying on a sidewalk, staring at the sky.

## 1.360 Component 359

[LABEL] **entailment** [PRED] **entailment** [COEFF] 18.8154

[P] A performer wrapped in tight fabric hangs by her ankle from a scaffolding underneath a blue sky.

[H] A performer wrapped in a fabric hangs by her ankle from a scaffolding.

[LABEL] **entailment** [PRED] **entailment** [COEFF] 18.6437

[P] I see a man putting his items from the shopping cart, ready to be checked out.

[H] I see a man putting his items from the cart, ready to be checked out.

[LABEL] **entailment** [PRED] **entailment** [COEFF] 14.7063

[P] A woman in sunglasses and a short skirt stands on a street filled with smoke or fog.

[H] A woman in sunglasses and a skirt stands on a street filled with smoke or fog.

[LABEL] **entailment** [PRED] **entailment** [COEFF] 13.9843

[P] A little girl wearing a pink and white striped bib is eating oatmeal at a restaurant table.

[H] A little girl wearing a pink and white striped bib is eating oatmeal at a restaurant table.

[LABEL] **entailment** [PRED] **entailment** [COEFF] 13.8572

[P] A young lady in gym attire is trying to reach the top of a wall that is covered in graffiti.

[H] A young lady in gym attire is trying to reach the top of a wall

[LABEL] **entailment** [PRED] **entailment** [COEFF] 13.4184

[P] A pair of men in shorts lay on the concrete in a drainage culvert, surrounded by graffiti.

[H] A pair of men in shorts surrounded by graffiti lay on the concrete in a drainage culvert.

[LABEL] **entailment** [PRED] **entailment** [COEFF] 13.3979

[P] A man in a yellow shirt checks readings on a device outside of barnsdall art park.

[H] A man in a yellow shirt checks readings on a device outside of a park.

[LABEL] **entailment** [PRED] **entailment** [COEFF] 13.2058

[P] A group of hockey players and one official stand on the ice during a game.

[H] A group of hockey players and one official stand on the ice

[LABEL] **entailment** [PRED] **entailment** [COEFF] 13.0759

[P] A tanned - skin female athlete in a purple and white outfit suspends herself in midair against a metal pole.

[H] A tanned skin female athlete in a purple and white outfit suspends herself in midair against a metal pole

[LABEL] **entailment** [PRED] **entailment** [COEFF] 12.9558

[P] A basketball player jumps up with the ball as two others watch.

[H] A player jumps up with the ball as two others watch.

[LABEL] **neutral** [PRED] **entailment** [COEFF] 12.9262

[P] An old man stands in front of a building front papered with election signs.

[H] An old man stands in front of a building front papered with old election signs.

[LABEL] **entailment** [PRED] **entailment** [COEFF] 12.9175

[P] Goalie reaching to block a soccer ball from going in the net.

[H] Goalie reaches to block a soccer ball from entering the net

[LABEL] **entailment** [PRED] **entailment** [COEFF] 12.6483

[P] A dark street scene shows a neon lights and a group of people dining while another group walks.

[H] A dark street scene shows a neon lights and a group of people dining while another group walks

[LABEL] **entailment** [PRED] **entailment** [COEFF] 12.5971

[P] A boy has his head down and is wearing a shirt that says adhd.

[H] A boy has his head down and wears a shirt that says adhd.

[LABEL] **entailment** [PRED] **entailment** [COEFF] 12.4676

[P] A crowd in a daily routine in an asian suburb.

[H] A crowds daily routine in an asian neighborhood

[LABEL] **entailment** [PRED] **entailment** [COEFF] 12.2512

[P] A construction worker creates a cloud of dust as he works.

[H] A worker creates a cloud of dust as he works.

### 1.361 Component 360

[LABEL] **contradiction** [PRED] **contradiction** [COEFF] 4.8188

[P] A night photo of a person making a fireball.

[H] A night photo of several people making a snowman.

[LABEL] **contradiction** [PRED] **contradiction** [COEFF] 4.3849

[P] A baseball player is mid - swing, while the catcher behind him hold out his glove.

[H] The golfer is mid - swing, while the people behind him watch.

[LABEL] **contradiction** [PRED] **contradiction** [COEFF] 4.1271

[P] A football player for the green bay packers throws the football during a game.

[H] A cheerleader for the detroit lions throws a football.

[LABEL] **contradiction** [PRED] **contradiction** [COEFF] 3.9289

[P] A dog is running through a lake towards some trees.

[H] A bear runs through a field.

[LABEL] **contradiction** [PRED] **contradiction** [COEFF] 3.9188

[P] A family sits around at christmas time, some playing jenga while others play with children.

[H] A family sits around at summer time, some playing monopoly.

[LABEL] **contradiction** [PRED] **contradiction** [COEFF] 3.7968

[P] An ice hockey player takes water from a green bottle.

[H] A tennis player is throwing a bottle.

[LABEL] **contradiction** [PRED] **contradiction** [COEFF] 3.7539

[P] High school football players practice while coach watches.

[H] Tennis players practice.

[LABEL] **contradiction** [PRED] **contradiction** [COEFF] 3.5595

[P] A girls volleyball team can be seen making a return on the ball.

[H] A boys soccer team in action.

[LABEL] **contradiction** [PRED] **contradiction** [COEFF] 3.4649

[P] A group of children dressed for halloween stand in line with the exception of one girl.

[H] The group of children are dressed at a christmas stand.

[LABEL] **contradiction** [PRED] **contradiction** [COEFF] 3.4147

[P] A car is fully loaded, with passengers and rooftop cargo.

[H] A truck is fully loaded, with passengers and rooftop cargo.

[LABEL] **contradiction** [PRED] **contradiction** [COEFF] 3.4101

[P] A small crowd cheers on runners during a race by clapping and cheering.

[H] A large crowd cheers on toddlers.

[LABEL] **contradiction** [PRED] **contradiction** [COEFF] 3.3832

[P] A man is sitting between two other men on a subway while reading a magazine.

[H] A man is sitting between two women on a bus.

[LABEL] **contradiction** [PRED] **contradiction** [COEFF] 3.3204

[P] A boy leaping in the air towards a soccer ball.

[H] A boy leaps toward a baseball.

[LABEL] **contradiction** [PRED] **contradiction** [COEFF] 3.3124

[P] A male mountain biker is captured midair after jumping from a dirt ramp, while another mountain biker looks on.

[H] A lesbian mountain biker jumps onto a dirty bed.

[LABEL] **contradiction** [PRED] **contradiction** [COEFF] 3.3006

[P] Young men search through compact discs.

[H] Old people look at records.

[LABEL] **contradiction** [PRED] **contradiction** [COEFF] 3.2815

[P] A woman does her shopping at the local walmart

[H] A woman shopping at target.

### 1.362 Component 361

[LABEL] **entailment** [PRED] **entailment** [COEFF] 49.6057

[P] A brown dog is playing outside in a grassy area.

[H] A dog is outdoors

[LABEL] **entailment** [PRED] **entailment** [COEFF] 48.2950

[P] A young redheaded toddler blows bubbles at the playground.

[H] A toddler is outdoors.

[LABEL] **entailment** [PRED] **entailment** [COEFF] 46.9980

[P] A person walking on a trail with a red shirt and blue hat on.

[H] A person is outdoors.

[LABEL] **entailment** [PRED] **entailment** [COEFF] 43.6456

[P] People sitting at a picnic table in a grassy area near a tree.

[H] There are people outdoors.

[LABEL] **entailment** [PRED] **entailment** [COEFF] 42.5622

[P] A group of people sitting on benches at a city park.

[H] There are people outdoors.

[LABEL] **entailment** [PRED] **entailment** [COEFF] 42.2410

[P] A black, white and brown tri - colored mid - sized dog jumps over a red and white jump in a field with tents and cars nearby.

[H] There is a dog outdoors

[LABEL] entailment [PRED] entailment [COEFF] 41.8404

[P] People are relaxing on cement stairs with grass, while others walk by.

[H] People are outdoors.

[LABEL] entailment [PRED] entailment [COEFF] 41.5785

[P] Two black and white dogs look toward something in the air while running in a grassy field.

[H] Dogs are running outdoors.

[LABEL] entailment [PRED] entailment [COEFF] 41.4164

[P] A brown dog with white paws is trotting through a field of green grass.

[H] A dog is outdoors.

[LABEL] entailment [PRED] entailment [COEFF] 39.9297

[P] A dog is running along a beach in front of the ocean.

[H] There is an animal outdoors.

[LABEL] entailment [PRED] entailment [COEFF] 39.5818

[P] Two children running in a field with a kite there is a fence in the background and mountains

[H] Two children are outdoors.

[LABEL] entailment [PRED] entailment [COEFF] 37.9407

[P] A yellow dog running across a lush green lawn.

[H] An animal is outdoors.

[LABEL] entailment [PRED] entailment [COEFF] 37.5148

[P] Three boys are playing outside, and two are holding a giant ball that looks like a globe while the other jumps up high over it.

[H] Three boys are outdoors.

[LABEL] entailment [PRED] entailment [COEFF] 35.7681

[P] A man in a baseball tee - shirt is sweeping what appears to be an empty pond in a festive looking backyard.

[H] A man is outdoors

[LABEL] entailment [PRED] entailment [COEFF] 34.2055

[P] The brown and white dogs run through the field.

[H] There are dogs outdoors.

[LABEL] entailment [PRED] entailment [COEFF] 34.0311

[P] Man wearing a black coat walks outside talking on his cellphone.

[H] A man is outdoors.

### 1.363 Component 362

[LABEL] entailment [PRED] entailment [COEFF] 9.0997

[P] Young woman in suit sitting on white bench

[H] A woman is sitting on a bench.

[LABEL] entailment [PRED] entailment [COEFF] 9.0394

[P] Young woman dressed in black looks over articles from a street vendor.

[H] A woman is dressed in black

[LABEL] entailment [PRED] entailment [COEFF] 8.2343

[P] Little boy in plaid shirt blows bubbles outdoors.

[H] A child is wearing a plaid shirt.

[LABEL] entailment [PRED] entailment [COEFF] 7.7814

[P] The little girl is sitting in the chair with her head resting on the arm of the chair.

[H] A girl is resting her head on the arm of a chair.

[LABEL] entailment [PRED] entailment [COEFF] 7.2200

[P] Woman in white lab coat and rubber gloves fills vial with substance.

[H] A women fills a vial with substance.

[LABEL] entailment [PRED] entailment [COEFF] 6.9802

[P] Girl in red and black raising her leg

[H] A girl raises her leg

[LABEL] entailment [PRED] entailment [COEFF] 6.9752

[P] Skimpily clad cowgirl climbs over barbwire fence

[H] A cowgirl climbs a fence.

[LABEL] entailment [PRED] entailment [COEFF] 6.9268

[P] Beautiful little girl holding up her hat with one finger is getting her picture taken out in a gorgeous field.

[H] A little girl is holding up a hat.

[LABEL] entailment [PRED] entailment [COEFF] 6.5211

[P] The man is walking towards a group of people on a long dirt road.

[H] A man walks on a dirt road.

[LABEL] entailment [PRED] entailment [COEFF] 6.5080

[P] A young girl who is sitting on a giant orange pumpkin and is surrounded by pots of flowers smiles for the camera.

[H] A girl sits on a pumpkin.

[LABEL] entailment [PRED] entailment [COEFF] 6.4825

[P] Man with mardi gras beads around his neck holding pole with banner

[H] A man has beads around his neck

[LABEL] entailment [PRED] entailment [COEFF] 6.4655

[P] Woman in blue shirt blowing very large bubble

[H] A woman blows a bubble.

[LABEL] **entailment** [PRED] **entailment** [COEFF] 6.3791

[P] The lady with the cane is sitting on a bench.

[H] A woman sits on a bench.

[LABEL] **entailment** [PRED] **entailment** [COEFF] 6.3634

[P] Newborn laying in bed slightly covered up with a blanket.

[H] A baby is laying in a bed.

[LABEL] **entailment** [PRED] **entailment** [COEFF] 6.0557

[P] Girl playing acoustic guitar on homemade milk crate stage.

[H] A girl is playing a guitar.

[LABEL] **neutral** [PRED] **entailment** [COEFF] 5.9507

[P] Young girl waving turquoise leotard and pink tutu with wings waving wand.

[H] A young girl is waving a turquoise leotard.

### 1.364 Component 363

[LABEL] **entailment** [PRED] **entailment** [COEFF] 55.8084

[P] A man wearing a black jacket is playing guitar.

[H] A man is playing music.

[LABEL] **entailment** [PRED] **entailment** [COEFF] 55.0425

[P] A woman wearing pink pants is sitting on a chair and playing the bass guitar.

[H] A woman is playing music.

[LABEL] **entailment** [PRED] **entailment** [COEFF] 52.9138

[P] An african american man playing guitar in the subway.

[H] A man is playing music

[LABEL] **entailment** [PRED] **entailment** [COEFF] 51.4857

[P] A man dressed in purple playing guitar

[H] The guy is playing music.

[LABEL] **entailment** [PRED] **entailment** [COEFF] 49.1302

[P] A man is playing a xylophone.

[H] The man is playing music

[LABEL] **neutral** [PRED] **entailment** [COEFF] 49.1151

[P] A woman doing a solo on her trumpet.

[H] The woman is playing music.

[LABEL] **entailment** [PRED] **entailment** [COEFF] 45.5499

[P] A man with a mustache and a black shirt is playing the saxophone.



[H] The man is playing music.

[LABEL] **entailment** [PRED] **entailment** [COEFF] 41.9422

[P] Four males on a stage playing various instruments.

[H] They are playing music.

[LABEL] **entailment** [PRED] **entailment** [COEFF] 38.4438

[P] A man in jeans and sandals sits outside near trees and a goose and plays a string instrument.

[H] The man is playing music.

[LABEL] **entailment** [PRED] **entailment** [COEFF] 37.9488

[P] A man playing guitar with a baby in the corner.

[H] The man is playing music with a baby.

[LABEL] **entailment** [PRED] **entailment** [COEFF] 35.4685

[P] A man with a beard in the foreground playing bagpipes

[H] The man is playing music.

[LABEL] **neutral** [PRED] **entailment** [COEFF] 31.9493

[P] A man dressed in a white shirt and black vest is playing an electric guitar.

[H] A man dressed up to play music.

[LABEL] **entailment** [PRED] **entailment** [COEFF] 31.8039

[P] Two females are playing instruments, one the piano and one the violin, indoors with another woman looking on.

[H] People are playing music

[LABEL] **entailment** [PRED] **entailment** [COEFF] 31.6251

[P] A young lady is playing a guitar and singing.

[H] A woman performs music

[LABEL] **entailment** [PRED] **entailment** [COEFF] 29.8808

[P] A band plays bathed in stage lights.

[H] A band is playing music.

[LABEL] **entailment** [PRED] **entailment** [COEFF] 29.0679

[P] A white male with a shaved head and goatee wearing a black t - shirt and blue jeans is playing a guitar with red symbols painted on it in some structure with columns and a wooden roof.

[H] A person is playing music.

## 1.365 Component 364

[LABEL] **entailment** [PRED] **entailment** [COEFF] 24.9172

[P] An older man is playing a saxophone.

[H] The man is a musician

[LABEL] **neutral** [PRED] **neutral** [COEFF] 23.2059

[P] A man wearing a blue shirt and black pants is working on an unfinished tile roof of a building.  
[H] The man is a construction worker

[LABEL] **entailment** [PRED] **entailment** [COEFF] 22.9453  
[P] A man in overalls plays the guitar and sings.  
[H] The man is a musician.

[LABEL] **entailment** [PRED] **neutral** [COEFF] 22.6088  
[P] A woman in a red shirt plays a cello.  
[H] The woman is a musician.

[LABEL] **neutral** [PRED] **neutral** [COEFF] 22.4835  
[P] A man is drawing graffiti on the side of a gray wall.  
[H] The man is an artist.

[LABEL] **entailment** [PRED] **entailment** [COEFF] 21.2512  
[P] A tattooed man in black playing a white guitar and singing.  
[H] This man is a musician.

[LABEL] **entailment** [PRED] **entailment** [COEFF] 20.3873  
[P] A little girl on a swing.  
[H] The girl is young

[LABEL] **entailment** [PRED] **entailment** [COEFF] 20.2344  
[P] A person in a tan shirt is playing an electric guitar.  
[H] The person is a musician.

[LABEL] **neutral** [PRED] **neutral** [COEFF] 19.8401  
[P] A man in a white shirt and black vest with a helmet riding a horse for what seems to be a rodeo.  
[H] The man is a cowboy.

[LABEL] **neutral** [PRED] **entailment** [COEFF] 19.3997  
[P] One woman with red - hair and sunglasses serving a beer from the tap.  
[H] The woman is a bartender.

[LABEL] **neutral** [PRED] **neutral** [COEFF] 18.3319  
[P] A man in an orange ski suit top with black bottoms has finished performing a trick and is in midair.  
[H] The man is a skier.

[LABEL] **entailment** [PRED] **entailment** [COEFF] 18.0862  
[P] A man in an orange shirt hits a golf ball.  
[H] The man is playing golf.

[LABEL] **neutral** [PRED] **neutral** [COEFF] 17.8068  
[P] A man dressed as a soldier carrying guns.  
[H] The man is in the military.

[LABEL] entailment [PRED] neutral [COEFF] 17.3757

[P] A little boy in an apron helps his mother cook.

[H] The boy can cook a little

[LABEL] entailment [PRED] neutral [COEFF] 17.3262

[P] A young boy in a green shirt is strapped in a harness climbing a rock wall.

[H] The rock wall is in use.

[LABEL] neutral [PRED] neutral [COEFF] 17.2937

[P] Two women in hats are standing in front of onlookers, one is playing a violin and the other is playing an accordion.

[H] The women are musicians.

### 1.366 Component 365

[LABEL] contradiction [PRED] contradiction [COEFF] 13.5751

[P] An old man wearing a tan jacket and blue pants standing on a sidewalk with a small suitcase.

[H] A young woman sits on a bench holding her purse.

[LABEL] contradiction [PRED] contradiction [COEFF] 13.4633

[P] A man in a white t - shirt and dark cap begins to mark wood with a felt tip pen.

[H] A woman is doing some embroidery

[LABEL] contradiction [PRED] contradiction [COEFF] 13.4437

[P] A man in a red coat is snowblowing a parking lot.

[H] A woman is running around

[LABEL] contradiction [PRED] contradiction [COEFF] 13.0225

[P] A man, wearing an orange hard hat, standing on top a pile of bricks and rubble.

[H] A woman reads as she waits for her food.

[LABEL] contradiction [PRED] contradiction [COEFF] 12.6925

[P] A man wearing a white hard hat and orange vest is working in a dusty environment.

[H] A woman is sleeping in the grass

[LABEL] contradiction [PRED] contradiction [COEFF] 11.7573

[P] A man in a blue welder's helmet, shirt, and jeans is welding the framework of a building on a reddish beam.

[H] A woman in a red dress is knitting inside a room.

[LABEL] contradiction [PRED] contradiction [COEFF] 11.5330

[P] A man in a blank tank top lying down on a gray bench.

[H] A woman is cleaning the snow off of her car.

[LABEL] contradiction [PRED] contradiction [COEFF] 11.4367

[P] A man in blue bravely cleans windows on a tall building during the day.

[H] A woman is jogging with her dog.

[LABEL] **contradiction** [PRED] **contradiction** [COEFF] 11.4091

[P] A man in a green hat with a red and yellow star looks to the left with a serious expression.

[H] A woman laughs in joy.

[LABEL] **contradiction** [PRED] **contradiction** [COEFF] 10.9793

[P] A young man walks through a puddle outside with a blue three wheeler bike is parked in the same puddle.

[H] A woman sits at her vanity, wearing a pink nightgown, and taking off her makeup for the day.

[LABEL] **contradiction** [PRED] **contradiction** [COEFF] 10.7870

[P] A man wearing a plaid shirt is painting on a large sheet.

[H] A woman drinks a ginger ale.

[LABEL] **contradiction** [PRED] **contradiction** [COEFF] 10.7129

[P] A man in a white and black uniform carries luggage and blankets across a sidewalk outside of a red bricked building.

[H] A woman is laying in her bed.

[LABEL] **contradiction** [PRED] **contradiction** [COEFF] 10.6891

[P] An old man with a mustache is sitting down holding a gun and smiling.

[H] The woman is cleaning off the knife.

[LABEL] **contradiction** [PRED] **contradiction** [COEFF] 10.6769

[P] A man in sunglasses and a neatly trimmed beard overlooks a woody valley.

[H] A woman cuts down trees.

[LABEL] **contradiction** [PRED] **contradiction** [COEFF] 10.3398

[P] A man in a gray coat is standing on a washed out bridge.

[H] A woman is dancing for her husband at a dance club.

[LABEL] **contradiction** [PRED] **contradiction** [COEFF] 10.2400

[P] A bearded man with glasses does a toe - touch.

[H] A woman is cooking some food.

### 1.367 Component 366

[LABEL] **contradiction** [PRED] **contradiction** [COEFF] 7.9341

[P] A man and a smiling young boy in a float vest are swimming together.

[H] The man is climbing a tree.

[LABEL] **contradiction** [PRED] **contradiction** [COEFF] 7.7312

[P] Two guys are sitting in a bar while one holds a beer bottle.

[H] Two guys are skiing down a mountain.

[LABEL] **contradiction** [PRED] **contradiction** [COEFF] 7.3278

[P] A street vendor selling skewers is standing with his hands on his hips.

[H] The vendor is climbing a mountain.

[LABEL] contradiction [PRED] contradiction [COEFF] 6.3735

[P] A boy makes a jump with a dirt bike with the sun setting behind him.

[H] A boy is mountain climbing.

[LABEL] contradiction [PRED] contradiction [COEFF] 5.9572

[P] A woman wearing a bright red shirt and a yellow jacket is ladling something into a metal pan while surrounded by fresh produce at an outdoor market.

[H] The woman is skiing down a mountain.

[LABEL] contradiction [PRED] contradiction [COEFF] 5.8815

[P] Three men are dancing while the band plays and others enjoy the entertainment.

[H] Three men are climbing a rock wall.

[LABEL] contradiction [PRED] contradiction [COEFF] 5.2544

[P] A woman in a yellow bikini top and sunglasses in a crowd of people on a boardwalk.

[H] The woman is skiing down a slope.

[LABEL] contradiction [PRED] contradiction [COEFF] 5.2055

[P] The little boy is laying back relaxing on the colorful blanket.

[H] The boy is climbing a tree.

[LABEL] contradiction [PRED] contradiction [COEFF] 4.9845

[P] A woman climbing a mountain.

[H] A woman running down a hill.

[LABEL] contradiction [PRED] contradiction [COEFF] 4.8062

[P] A blond woman walking a plaza in front of brightly colored buildings.

[H] A blonde woman is climbing buildings in the city.

[LABEL] contradiction [PRED] contradiction [COEFF] 4.7958

[P] A person is climbing a very stony mountain overlooking blue sky and more mountains.

[H] A person is running through a valley.

[LABEL] contradiction [PRED] contradiction [COEFF] 4.5167

[P] A man climbing a rock wall

[H] A man is standing on a mountaintop.

[LABEL] contradiction [PRED] contradiction [COEFF] 4.4457

[P] This is a group of women playing volleyball in sports bikinis.

[H] The women are skiing.

[LABEL] contradiction [PRED] contradiction [COEFF] 4.3942

[P] A surfer catches a wave as a man on a jet ski looks on in case of an accident.

[H] A surfer is hiking on the mountains.

[LABEL] contradiction [PRED] contradiction [COEFF] 4.3560

[P] A person is riding in a canoe on a lake next to green trees.

[H] The man is at the summit of mt. everest.

[LABEL] contradiction [PRED] contradiction [COEFF] 4.3472

[P] Children are canoeing on a beautiful lake.

[H] The kids are climbing a mountain.

## 1.368 Component 367

[LABEL] entailment [PRED] entailment [COEFF] 12.9959

[P] The lady wearing black rimmed glasses and a yellow sweater jacket looks confused as she sits on the tan covered bench.

[H] The lady wearing black rimmed glasses.

[LABEL] entailment [PRED] entailment [COEFF] 12.5378

[P] An elderly woman walking with a cane, holding a sign and a small plastic cup.

[H] An older woman walking with a cane.

[LABEL] entailment [PRED] entailment [COEFF] 11.8786

[P] A young girl in a pink dress stares at a metro newspaper rack.

[H] A young girl is in a pink dress

[LABEL] entailment [PRED] entailment [COEFF] 11.5244

[P] A little boy playing with a mop that is moving quickly, and has many toys in the background.

[H] A little boy is playing with a mop.

[LABEL] entailment [PRED] entailment [COEFF] 10.7267

[P] A girl wearing a printed outfit with brown short hair smiling and holding hands with someone while standing next to a boy wearing a black t - shirt and dark sunglasses.

[H] A girl in printed outfit

[LABEL] entailment [PRED] entailment [COEFF] 10.0894

[P] A woman sits outside of a shop while she has some sort of sign on her lap.

[H] A woman is sitting outside of a shop

[LABEL] entailment [PRED] entailment [COEFF] 10.0652

[P] A view of a series of balconies on a city street crowded with buildings, with one woman in a purple shirt standing on a balcony on the left.

[H] A series of balconies on a city street.

[LABEL] entailment [PRED] entailment [COEFF] 9.8980

[P] A child sitting at a restaurant table holding a paper mask against his face.

[H] A child is sitting at a restaurant table.

[LABEL] entailment [PRED] entailment [COEFF] 9.4768

[P] Someone on a nitro snowboard in midair and another person on the ground behind them.

[H] Someone is on a nitro snowboard.

[LABEL] entailment [PRED] entailment [COEFF] 9.2811

[P] A girl wearing a bohemian hat and black jacket is walking trying to get something out of her blue purse.

[H] A girl is wearing a bohemian hat.

[LABEL] neutral [PRED] entailment [COEFF] 9.2248

[P] Children are playing doctor on an older woman, one is wearing a toy stethoscope, the other a red mickey mouse shirt.

[H] Children are playing doctor on an older woman.

[LABEL] entailment [PRED] entailment [COEFF] 9.1926

[P] Two little girls in a hallway, a woman standing in the background.

[H] Two girls in a hallway.

[LABEL] entailment [PRED] entailment [COEFF] 9.0603

[P] Two young girls are hanging on a tire swing with their backs arched and heads down, posing and smiling for the camera.

[H] Two young girls are hanging on a tire swing.

[LABEL] entailment [PRED] entailment [COEFF] 9.0537

[P] Three men stand in an art gallery, two of them point at objects unseen.

[H] Three men are in an art gallery.

[LABEL] entailment [PRED] entailment [COEFF] 8.6737

[P] A man in a leather jacket stands on a ladder by an image of a smiling lady holding a turkey dinner.

[H] The man in the leather jacket is standing on the ladder.

[LABEL] entailment [PRED] entailment [COEFF] 8.5679

[P] A man touches his back pocket as a blond woman behind the counter of a convenience store looks at him.

[H] A man touches his back pocket.

### 1.369 Component 368

[LABEL] entailment [PRED] entailment [COEFF] 6.2405

[P] Two ladies engage in a discussion in an office.

[H] Two women talk to each other in an office.

[LABEL] entailment [PRED] entailment [COEFF] 6.0682

[P] A woman runs in a lake under a cloudy sky.

[H] A woman is running in the water.

[LABEL] entailment [PRED] entailment [COEFF] 5.2352

[P] The table is set with many types of food.

[H] The table has food on it

[LABEL] **entailment** [PRED] **entailment** [COEFF] 5.1725

[P] A group of people play a card game at a table in a building.

[H] People are gathered around a table.

[LABEL] **neutral** [PRED] **entailment** [COEFF] 4.9092

[P] The ballet dancers perform on stage.

[H] Dancers are on stage at a performance

[LABEL] **entailment** [PRED] **entailment** [COEFF] 4.8556

[P] A man is drilling in the side of a building.

[H] The man is working with a drill.

[LABEL] **entailment** [PRED] **entailment** [COEFF] 4.8451

[P] A man running on a track.

[H] A man is taking a run on the track.

[LABEL] **entailment** [PRED] **entailment** [COEFF] 4.7973

[P] Children walk down a path on a sunny fall day.

[H] The children go for a walk on this sunny day.

[LABEL] **entailment** [PRED] **entailment** [COEFF] 4.7939

[P] Two boxers punch each other in the face at the same time.

[H] Two boxers connecting punches at once.

[LABEL] **entailment** [PRED] **entailment** [COEFF] 4.7295

[P] Man in black waits at crossing signal near large brick building.

[H] A man is wearing black crossing near a building.

[LABEL] **entailment** [PRED] **entailment** [COEFF] 4.7133

[P] A beagle walks down a grassy hill.

[H] A beagle is walking on an incline.

[LABEL] **entailment** [PRED] **entailment** [COEFF] 4.6809

[P] Small girl getting her face painted.

[H] A small girl with paint on her face.

[LABEL] **entailment** [PRED] **entailment** [COEFF] 4.5336

[P] A woman speaks into a microphone at a social gathering.

[H] A woman is speaking to people through a microphone.

[LABEL] **neutral** [PRED] **entailment** [COEFF] 4.5286

[P] Two people are dressed in animal costumes and are walking down a street.

[H] Two people in animal costumes are walking past other people.

[LABEL] **entailment** [PRED] **entailment** [COEFF] 4.3937



[P] A bunch of guys watching something on a computer screen.

[H] A group of guys are looking at the computer.

[LABEL] **entailment** [PRED] **entailment** [COEFF] 4.3631

[P] A woman standing in a costume.

[H] Someone is standing up and wearing a costume.

### 1.370 Component 369

[LABEL] **neutral** [PRED] **neutral** [COEFF] 26.0111

[P] The black dog in front of the tree has a green toy in its mouth.

[H] A dog is in front of a tree at a park.

[LABEL] **neutral** [PRED] **neutral** [COEFF] 25.7796

[P] Several street performers beat tribal drums and dance while wearing matching white and red garb.

[H] Several street performers are beating tribal drums and dancing at a festival.

[LABEL] **neutral** [PRED] **neutral** [COEFF] 25.7173

[P] The girl in a blue dress is eating some blue cotton candy with one shoe off and one shoe on.

[H] A girl at eats cotton candy at a fair.

[LABEL] **neutral** [PRED] **neutral** [COEFF] 25.5332

[P] A muscular man in yellow pants.

[H] A man in yellow pants is at a gym.

[LABEL] **neutral** [PRED] **neutral** [COEFF] 24.7759

[P] Men are covered in some red color, not wearing a top and playing checkers.

[H] Men are painted red for a festival.

[LABEL] **neutral** [PRED] **neutral** [COEFF] 22.7635

[P] A clown with a red nose blowing bubbles.

[H] A clown is performing at the circus.

[LABEL] **neutral** [PRED] **neutral** [COEFF] 21.8702

[P] The grass has ice on it and there is a mountain in the background.

[H] The grass in a national park is covered in ice.

[LABEL] **neutral** [PRED] **neutral** [COEFF] 21.0838

[P] Woman in a pink shirt and wearing glasses.

[H] The woman is in a store.

[LABEL] **neutral** [PRED] **neutral** [COEFF] 20.9403

[P] A long, green board that has " lovely " written on it.

[H] A board is in a school

[LABEL] **neutral** [PRED] **neutral** [COEFF] 20.6546

[P] A man with glasses lighting a candle.

[H] A man lights a candle at church.

[LABEL] **neutral** [PRED] **neutral** [COEFF] 20.5528

[P] A man in a yellow shirt is playing slide on an acoustic guitar on a stage with a microphone.

[H] A man plays his guitar at a benefit concert.

[LABEL] **neutral** [PRED] **neutral** [COEFF] 19.9023

[P] A lady wearing a black dress carrying a white cross

[H] A lady is at a funeral.

[LABEL] **neutral** [PRED] **neutral** [COEFF] 19.7180

[P] A man wearing a red helmet rides a bike.

[H] A man is riding his bike to the store.

[LABEL] **neutral** [PRED] **neutral** [COEFF] 19.5661

[P] This girl is playing on an object which is yellow, green, red, and blue.

[H] The girls plays on the object during class.

[LABEL] **neutral** [PRED] **neutral** [COEFF] 19.5658

[P] A woman in a white kimono and bamboo hat.

[H] A lady is dressed as a geisha for a play.

[LABEL] **neutral** [PRED] **neutral** [COEFF] 19.2653

[P] Three young children play in a fountain.

[H] Kids play in a fountain at a park in the summertime.

## 1.371 Component 370

[LABEL] **entailment** [PRED] **entailment** [COEFF] 6.1000

[P] A dark - skinned man standing outside a small yellow building which is setup to sell items.

[H] A man is standing outside a building.

[LABEL] **entailment** [PRED] **entailment** [COEFF] 5.9269

[P] A man carrying a sign that says free hug along the sidewalk.

[H] A man carries a sign.

[LABEL] **entailment** [PRED] **entailment** [COEFF] 5.9088

[P] A man with glasses and black coat pushing a cart full of bags on a travelator.

[H] A man is pushing a cart.

[LABEL] **entailment** [PRED] **entailment** [COEFF] 5.4119

[P] A man who is wearing a black coat is standing behind a camera on a tripod.

[H] A man is wearing a black coat

[LABEL] **entailment** [PRED] **entailment** [COEFF] 5.3634

[P] A guy is working in a lab.

[H] A man in a lab.

[LABEL] entailment [PRED] entailment [COEFF] 5.2769

[P] A man in a blue shirt riding a motorcycle in japan.

[H] The man is wearing a blue shirt.

[LABEL] entailment [PRED] entailment [COEFF] 5.2156

[P] A man on an empty sidewalk near a structure with a backwards ec.

[H] A man is on an empty sidewalk.

[LABEL] entailment [PRED] entailment [COEFF] 5.1154

[P] A man dressing in a black shirt is waiting to cross the street with traffic.

[H] A man in a black shirt

[LABEL] entailment [PRED] entailment [COEFF] 5.0467

[P] A strange looking guy looking into a car.

[H] A man is peering inside a car.

[LABEL] entailment [PRED] entailment [COEFF] 5.0151

[P] A man is standing in front of a white wall with a business advertisement on it.

[H] A man is standing in front of a wall.

[LABEL] entailment [PRED] entailment [COEFF] 4.9620

[P] A male in a black shirt, and black pants, working on the engine of an old, green antique automobile, with a yellow gas canister sitting on the grass.

[H] A man is working on the engine of an old car.

[LABEL] entailment [PRED] entailment [COEFF] 4.8460

[P] A man standing at a podium with a mike in front of him with a banner behind him reading " the cooper union. "

[H] A man is standing on a podium.

[LABEL] entailment [PRED] entailment [COEFF] 4.8009

[P] A man walking down the street with his hands in his pocket, and an elderly woman stands near a staircase with her hand on her purse.

[H] A man is walking down the street.

[LABEL] entailment [PRED] entailment [COEFF] 4.7260

[P] A man standing on a green post watching a train go by.

[H] A man is watching a train

[LABEL] entailment [PRED] entailment [COEFF] 4.7043

[P] A man is bowling with various national flags displayed at the opposite end on the bowling alley.

[H] A man is bowling.

[LABEL] entailment [PRED] entailment [COEFF] 4.6580

[P] A man on stage as people watch him and wave arms.  
[H] A man is on stage.

### 1.372 Component 371

[LABEL] **neutral** [PRED] **entailment** [COEFF] 99.5699

[P] A male in a green striped tank top skateboarding.

[H] A man is skateboarding

[LABEL] **entailment** [PRED] **entailment** [COEFF] 93.7667

[P] A male restaurant employees are grilling burgers and cheese.

[H] A man is grilling food at a restaurant.

[LABEL] **entailment** [PRED] **entailment** [COEFF] 93.7429

[P] A male jumping into a swimming pool.

[H] A man jumping into a swimming pool

[LABEL] **entailment** [PRED] **entailment** [COEFF] 88.8137

[P] A male gymnast is wearing red tights and using the pommel horse.

[H] A man performs gymnastics.

[LABEL] **entailment** [PRED] **entailment** [COEFF] 84.8599

[P] A male skateboarder skates off the steps to make a trick move for the camera.

[H] A man is performing a skateboarding maneuver.

[LABEL] **entailment** [PRED] **entailment** [COEFF] 83.2631

[P] A male is sitting down on the beach playing a guitar.

[H] A man is playing guitar

[LABEL] **entailment** [PRED] **entailment** [COEFF] 75.4817

[P] A male drummer wearing sunglasses and a yellow t - shirt bangs on a conga hand drum during a street festival.

[H] A man is performing for a street festival.

[LABEL] **entailment** [PRED] **entailment** [COEFF] 72.5501

[P] Athletic male flipping down a steep, sandy hill.

[H] The man is doing flips down a hill.

[LABEL] **entailment** [PRED] **entailment** [COEFF] 70.6925

[P] A male percussionist plays the marimba with a look of concentration.

[H] A man concentrates while he play an instrument.

[LABEL] **entailment** [PRED] **entailment** [COEFF] 65.6587

[P] Male working on a tea pot sitting on the floor of his garage.

[H] A man is sitting on the floor in the garage working on a tea pot

[LABEL] **entailment** [PRED] **entailment** [COEFF] 64.8202

[P] A young male wearing a blue button up shirt is playing on a acoustic guitar.

[H] A man plays a guitar.

[LABEL] **neutral** [PRED] **entailment** [COEFF] 61.8737

[P] A male photographer takes a picture of a pond.

[H] A man takes a picture,

[LABEL] **entailment** [PRED] **entailment** [COEFF] 61.0114

[P] A short - haired male singer wearing a brown buttoned shirt plays the violin and sings on a stage, which is illuminated with a hot pink and blue display.

[H] A man sings on a stage

[LABEL] **entailment** [PRED] **entailment** [COEFF] 54.4527

[P] A guy is singing into a microphone.

[H] A man is singing.

[LABEL] **neutral** [PRED] **entailment** [COEFF] 49.9275

[P] Male gymnast on the rings.

[H] A man performs gymnastics on the rings.

[LABEL] **neutral** [PRED] **entailment** [COEFF] 41.0269

[P] White male painter painting a pillar on a ladder.

[H] A man is painting a pillar while while standing on a ladder.

### 1.373 Component 372

[LABEL] **contradiction** [PRED] **contradiction** [COEFF] 6.1505

[P] A man in red trunks looking into a lake.

[H] A man is in a bathroom.

[LABEL] **contradiction** [PRED] **contradiction** [COEFF] 5.2814

[P] A man in a hat and sandals is cooking a meal over a campfire.

[H] A child is eating ice cream in the kitchen.

[LABEL] **contradiction** [PRED] **contradiction** [COEFF] 4.4689

[P] A climber wearing a white helmet is perched on the side of a rock face.

[H] A person is doing push ups in a room.

[LABEL] **contradiction** [PRED] **contradiction** [COEFF] 4.0182

[P] A female soccer player throws the ball into play.

[H] A girl is eating cookies.

[LABEL] **contradiction** [PRED] **contradiction** [COEFF] 3.9881

[P] Three brown dogs on the patchy grass.

[H] Three dogs are in the car.

[LABEL] contradiction [PRED] contradiction [COEFF] 3.9731

[P] Male wearing brown shirt holding a microphone with an expression of singing.

[H] A man throwing snowballs.

[LABEL] contradiction [PRED] contradiction [COEFF] 3.9079

[P] A gray terrier runs in a snow - covered field.

[H] A dog eating a piece of bacon.

[LABEL] contradiction [PRED] contradiction [COEFF] 3.8633

[P] A man in a white apron is cooking something with eggs on a pan outside for a woman in a tan jacket.

[H] A man and a woman wearing a red jacket sharing a kiss underneath a tree.

[LABEL] contradiction [PRED] contradiction [COEFF] 3.7801

[P] Two dogs play in field of snow

[H] The dogs are rolling in sand.

[LABEL] contradiction [PRED] contradiction [COEFF] 3.7730

[P] A man wearing a red shirt and sandals is putting air into his bicycle's rear tire while a man in a white shirt holds the bicycle and a woman in a green floral dress watches.

[H] The men are repairing a canoe.

[LABEL] contradiction [PRED] contradiction [COEFF] 3.7139

[P] Two women buying baked goods from a man at a market.

[H] The man was selling fish at the docks.

[LABEL] contradiction [PRED] contradiction [COEFF] 3.7021

[P] A blond dog runs in the ocean surf.

[H] An empty bucket only.

[LABEL] contradiction [PRED] contradiction [COEFF] 3.6916

[P] The plants or shrubs have not been trimmed and are overgrown.

[H] This topiary has been neatly sculpted and trimmed.

[LABEL] contradiction [PRED] contradiction [COEFF] 3.6545

[P] Woman in sweatshirt and track pants squats in forest beside of giant mushroom.

[H] A person kneading dough on the counter.

[LABEL] contradiction [PRED] contradiction [COEFF] 3.6204

[P] A woman smiles as she cleans the floor with rags while a child lies recumbent on the sofa.

[H] The woman is eating a cake on the floor.

[LABEL] contradiction [PRED] contradiction [COEFF] 3.5624

[P] A tourist guide smiles for the camera as she hands out a map.

[H] A guide hands out snacks.

### 1.374 Component 373

[LABEL] entailment [PRED] entailment [COEFF] 39.4869

[P] An elderly man wearing a heavy green coat is selling his goods at his spot on the sidewalk.

[H] An elderly man is selling goods outside.

[LABEL] entailment [PRED] entailment [COEFF] 39.4623

[P] Two children are on a sidewalk playing with metal baskets.

[H] Children are playing outside.

[LABEL] entailment [PRED] entailment [COEFF] 39.1727

[P] A man in a hat is sitting on a bench on a sidewalk.

[H] A man is sitting outside.

[LABEL] entailment [PRED] entailment [COEFF] 35.1636

[P] A man in a red sweater sits on a green bench in a park.

[H] A man sits outside.

[LABEL] entailment [PRED] entailment [COEFF] 34.8914

[P] Several people, of various ages and clothing styles, stand near a sidewalk.

[H] Several people are standing outside.

[LABEL] neutral [PRED] entailment [COEFF] 34.3979

[P] A woman in a white hat is standing on a sidewalk.

[H] A woman is outside

[LABEL] entailment [PRED] entailment [COEFF] 33.8798

[P] Two men wearing hats are standing on the path beside a brick building.

[H] Two men with hats are standing outside.

[LABEL] entailment [PRED] entailment [COEFF] 30.1582

[P] A child is playing at a park.

[H] A child plays outside.

[LABEL] entailment [PRED] entailment [COEFF] 29.7579

[P] Two women smoking on the steps of a white building.

[H] Two women smoking outside.

[LABEL] entailment [PRED] entailment [COEFF] 29.0849

[P] People walking along a sidewalk.

[H] There are people walking outside.

[LABEL] entailment [PRED] entailment [COEFF] 28.7193

[P] A child stoops to the sidewalk to pick up his toy phone.

[H] A child is outside.

[LABEL] entailment [PRED] entailment [COEFF] 28.2086

[P] Two men walking down the sidewalk carrying skateboards.

[H] Two people are walking outside.

[LABEL] **entailment** [PRED] **entailment** [COEFF] 28.1406

[P] 5 fit men are going for a run on a brick pathway.

[H] 5 men running outside.

[LABEL] **entailment** [PRED] **entailment** [COEFF] 26.9938

[P] A boy and a girl are sitting on the sidewalk.

[H] A boy and girl are outside.

[LABEL] **entailment** [PRED] **entailment** [COEFF] 26.9822

[P] A woman in a black dress walks down the sidewalk.

[H] A woman is outside.

[LABEL] **entailment** [PRED] **entailment** [COEFF] 26.9073

[P] A man is sleeping on a park bench next to an empty bottle.

[H] A man is sleeping outside.

### 1.375 Component 374

[LABEL] **neutral** [PRED] **neutral** [COEFF] 16.1325

[P] A girl wearing a pink skateboard helmet is riding in a skateboard bowl.

[H] The girl in the skateboard bowl with the pink helmet is the best in her class.

[LABEL] **neutral** [PRED] **neutral** [COEFF] 13.5973

[P] A child wears three " rock out hands " held together by sunglasses on his head.

[H] The child wears sunglasses because it's bright outside.

[LABEL] **neutral** [PRED] **neutral** [COEFF] 13.5955

[P] A woman standing in front of a beach scene and smiling.

[H] A woman standing by the beach is smiling because it is warm.

[LABEL] **neutral** [PRED] **neutral** [COEFF] 12.4754

[P] A young kid wearing a helmet is riding a 4 - wheeler through the mud.

[H] A young kid wears his helmet while riding a 4 - wheeler to demonstrate safety to his friends.

[LABEL] **contradiction** [PRED] **neutral** [COEFF] 12.4476

[P] A woman with a black jacket and headphones standing next to a building that is under construction.

[H] The woman is mad because of the construction.

[LABEL] **neutral** [PRED] **neutral** [COEFF] 12.3589

[P] Some people are standing at a busy intersection waiting to cross the street.

[H] The intersection is busy because of rush hour.

[LABEL] **neutral** [PRED] **neutral** [COEFF] 12.1429



[P] A lady with brown hair is talking to a man in front of a motorcycle.

[H] The lady likes the man

[LABEL] **neutral** [PRED] **neutral** [COEFF] 11.8806

[P] Two men sweeping in a large building with decorated walls and pillars.

[H] Two men are sweeping because it's their job

[LABEL] **neutral** [PRED] **neutral** [COEFF] 11.8649

[P] Two men are talking with each other around the corner of a cemented type of building.

[H] Two men are talking to each other in the corner of a building about the project they are working on.

[LABEL] **neutral** [PRED] **neutral** [COEFF] 11.7256

[P] A young man in a blue shirt wears headphones and operates a turntable.

[H] A young man wearing headphones really enjoys operating the turntable.

[LABEL] **neutral** [PRED] **neutral** [COEFF] 11.7231

[P] A athletic man is smoking a cigarette while on break from work.

[H] The smoking athletic man is taking a break because his work is stressful.

[LABEL] **neutral** [PRED] **neutral** [COEFF] 11.5322

[P] A woman is sitting down reading a book.

[H] A woman is reading a romance book.

[LABEL] **neutral** [PRED] **neutral** [COEFF] 11.5215

[P] Two men dressed in black pants and shirts are lounging outside a door.

[H] Two men are dressed in black pants because it is cold.

[LABEL] **neutral** [PRED] **neutral** [COEFF] 11.4791

[P] Woman in ethnic clothing hanging laundry from a line off her balcony.

[H] A woman is hoping that it will not rain.

[LABEL] **neutral** [PRED] **neutral** [COEFF] 11.3044

[P] Three young children play in a fountain.

[H] Kids play in a fountain at a park in the summertime.

[LABEL] **neutral** [PRED] **neutral** [COEFF] 11.2818

[P] A woman in a purple dress is walking through a crowd.

[H] An angry woman in a purple dress is walking through a crowd.

### 1.376 Component 375

[LABEL] **contradiction** [PRED] **contradiction** [COEFF] 18.5412

[P] A formal dressed man on the outside of a building.

[H] The woman is standing by the building.

[LABEL] contradiction [PRED] contradiction [COEFF] 17.0199

[P] A man rides his bike over rocks and a creek.

[H] The woman is riding.

[LABEL] contradiction [PRED] contradiction [COEFF] 14.0321

[P] A man dives into a clear blue lake.

[H] The woman is diving into the ocean.

[LABEL] contradiction [PRED] contradiction [COEFF] 12.8703

[P] A man with a plate of food, is shoving food in his mouth with his hand.

[H] The woman is eating.

[LABEL] contradiction [PRED] contradiction [COEFF] 12.6024

[P] Two young men standing next to each other work together on a piece of equipment in a classroom or work - type setting.

[H] The woman worked on the sewing machine.

[LABEL] contradiction [PRED] contradiction [COEFF] 12.5321

[P] The man in the orange shirt is running a marathon.

[H] The woman walks in her work suit.

[LABEL] contradiction [PRED] contradiction [COEFF] 12.4765

[P] A man playing with his dog on a beach

[H] The woman is petting her cat.

[LABEL] contradiction [PRED] contradiction [COEFF] 12.4157

[P] A man in a black jacket and checkered hat wearing black and white striped pants plays an electric guitar on a stage with a singer and another guitar player in the background.

[H] The woman played the electric guitar.

[LABEL] contradiction [PRED] contradiction [COEFF] 12.1280

[P] An older man walks down the sidewalk of a park towards parking lot.

[H] The woman is walking towards her bike.

[LABEL] contradiction [PRED] contradiction [COEFF] 12.0355

[P] People are photographing a man on a bicycle who is holding an umbrella.

[H] The woman was on the bike

[LABEL] contradiction [PRED] contradiction [COEFF] 11.9534

[P] An elderly man sells magazines in a stand.

[H] The woman sells books at her store

[LABEL] contradiction [PRED] contradiction [COEFF] 11.7315

[P] An old man with a mustache is sitting down holding a gun and smiling.

[H] The woman is cleaning off the knife.

[LABEL] contradiction [PRED] contradiction [COEFF] 11.5923

[P] A man surfs by the golden gate bridge on a foggy day.

[H] The woman is surfing.

[LABEL] **contradiction** [PRED] **contradiction** [COEFF] 10.0003

[P] A man uses a straight razor to shave his neck.

[H] The woman used the razor to shave her neck.

[LABEL] **contradiction** [PRED] **contradiction** [COEFF] 9.8200

[P] The man is on a bike and sitting in front of the sunset.

[H] The woman is riding her bike towards the sunrise.

[LABEL] **contradiction** [PRED] **contradiction** [COEFF] 9.7594

[P] A man walks through an arcade.

[H] The woman walked through the store.

### 1.377 Component 376

[LABEL] **neutral** [PRED] **neutral** [COEFF] 21.7732

[P] The gondola is poling his boat in the canal.

[H] The gondola is wearing a black and white striped shirt

[LABEL] **neutral** [PRED] **neutral** [COEFF] 21.4690

[P] A construction worker is laboring on part of a house near a chain - link fence and trees.

[H] The worker is wearing blue jeans and an orange vest.

[LABEL] **neutral** [PRED] **neutral** [COEFF] 20.2707

[P] People sitting on a rooftop looking out into the water.

[H] The people are wearing sunglasses.

[LABEL] **contradiction** [PRED] **neutral** [COEFF] 20.0188

[P] A man riding on a bike with a pile of things in a large wooden crate behind him.

[H] The man on the bike is wearing a clown costume

[LABEL] **neutral** [PRED] **neutral** [COEFF] 18.7844

[P] Marathon volunteers standing at start line keeping runners from beginning.

[H] Marathon volunteers stand at the start line with backpacks and water bottles.

[LABEL] **neutral** [PRED] **neutral** [COEFF] 17.5392

[P] A man speaking at a conference.

[H] The man is wearing black shoes.

[LABEL] **neutral** [PRED] **neutral** [COEFF] 17.5312

[P] A group of downhill skateboards going down a hill.

[H] The skateboarders are wearing helmets.

[LABEL] **neutral** [PRED] **neutral** [COEFF] 17.2609

[P] A little girl and a dog playing in a creek.  
[H] The girl is wearing shoes to protect her feet from sharp rocks.

[LABEL] **neutral** [PRED] **neutral** [COEFF] 16.4387  
[P] A boy and a girl are sitting on the sidewalk.  
[H] The children are writing on the sidewalk with chalk.

[LABEL] **neutral** [PRED] **neutral** [COEFF] 16.3500  
[P] Two men are standing in a group appear to look at something.  
[H] There are two men wearing red jackets standing in a group.

[LABEL] **neutral** [PRED] **neutral** [COEFF] 16.2970  
[P] Men are working by a road in with limbs in the roadway.  
[H] The men are wearing orange.

[LABEL] **neutral** [PRED] **neutral** [COEFF] 15.2592  
[P] A man pulls a coach with two geishas on board.  
[H] The geishas are wearing white makeup.

[LABEL] **neutral** [PRED] **neutral** [COEFF] 15.0429  
[P] A young man is performing gymnastics to impress a young woman.  
[H] The man is wearing black tights.

[LABEL] **neutral** [PRED] **neutral** [COEFF] 15.0346  
[P] A man descends a snowy mountain.  
[H] The man is using tools to help descend the mountain.

[LABEL] **neutral** [PRED] **neutral** [COEFF] 14.8075  
[P] A person standing on stilts is bending over.  
[H] A person on stilts bends over to get a cheeseburger.

[LABEL] **neutral** [PRED] **neutral** [COEFF] 14.7648  
[P] A group of people walking through a park with signs.  
[H] The group of people are all wearing white hats.

### 1.378 Component 377

[LABEL] **contradiction** [PRED] **contradiction** [COEFF] 4.3698  
[P] Three handlers lead a string of 11 camels, each carrying a pair of riders, through shallow water on a beach.  
[H] Three women riding bears through the forest.

[LABEL] **contradiction** [PRED] **contradiction** [COEFF] 4.3633  
[P] Asian male child crawling along the ocean with a man looking on with his horse.  
[H] A child crawls along the grass looking for bugs.

[LABEL] contradiction [PRED] contradiction [COEFF] 4.3068

[P] Three brown dogs on the patchy grass.

[H] Three dogs are in the car.

[LABEL] contradiction [PRED] contradiction [COEFF] 4.2830

[P] These people are playing basketball outdoors.

[H] The people are playing tennis outdoors.

[LABEL] neutral [PRED] contradiction [COEFF] 4.1265

[P] A kid doing a trick on a skateboard.

[H] The kid is wearing tennis shoes.

[LABEL] contradiction [PRED] contradiction [COEFF] 4.0812

[P] Four people with orange safety vest in a field hunting.

[H] People are running in a gymnasium.

[LABEL] contradiction [PRED] contradiction [COEFF] 4.0663

[P] A construction worker in a hard hat, red shirt and yellow and orange vest operates a piece of machinery in front of palm trees.

[H] A person is driving a car in front of oak trees.

[LABEL] contradiction [PRED] contradiction [COEFF] 3.8529

[P] A boy wearing an orange shirt is playing on a swing.

[H] A boy is playing in a treehouse.

[LABEL] contradiction [PRED] contradiction [COEFF] 3.8477

[P] Three children gather around a red float.

[H] The three children gather by an airplane.

[LABEL] contradiction [PRED] contradiction [COEFF] 3.8159

[P] Two dogs play in the snow.

[H] Dogs playing at the beach

[LABEL] contradiction [PRED] contradiction [COEFF] 3.7173

[P] A musician in a white shirt is playing his black violin.

[H] A musician is playing his french horn.

[LABEL] contradiction [PRED] contradiction [COEFF] 3.6792

[P] The boy wearing the red jacket is hanging on the side of the swing set.

[H] The boy is playing in the sandbox.

[LABEL] contradiction [PRED] contradiction [COEFF] 3.6545

[P] A snowboarder is beginning a stunt from the edge of a green jump box.

[H] The surfer rode the waves

[LABEL] contradiction [PRED] contradiction [COEFF] 3.4562

[P] A group of basketball players wearing yellow and green reach for a ball.

[H] The group of people are playing tennis.

[LABEL] **contradiction** [PRED] **contradiction** [COEFF] 3.4406

[P] A black and white dog playing in the snow together

[H] The dogs are jumping in the ocean together.

[LABEL] **contradiction** [PRED] **contradiction** [COEFF] 3.3809

[P] A child playing in an inflatable pool.

[H] A child plays in the yard.

### 1.379 Component 378

[LABEL] **contradiction** [PRED] **contradiction** [COEFF] 15.1751

[P] The little girl in the blue bathing suit is posing at the beach.

[H] A boy eats dirt.

[LABEL] **contradiction** [PRED] **contradiction** [COEFF] 11.2858

[P] A woman plays with a baby wearing a blue hooded sweatshirt and lying on a patterned rug.

[H] A man feeds his fish

[LABEL] **contradiction** [PRED] **contradiction** [COEFF] 10.8858

[P] The artist is sketching a picture of two women.

[H] A judge bangs his gavel.

[LABEL] **contradiction** [PRED] **contradiction** [COEFF] 10.8160

[P] A person on a skateboard during a high jump.

[H] The man is riding a horse.

[LABEL] **contradiction** [PRED] **contradiction** [COEFF] 10.5914

[P] A man and a young girl in a pink bathing suit float together on an inflatable tube in the water.

[H] Several men are lying down in an empty desert.

[LABEL] **contradiction** [PRED] **contradiction** [COEFF] 10.4457

[P] A woman in a yellow hospital gown is holding a sleeping child that has a cast on the right arm.

[H] A bird attacks a jogger's head.

[LABEL] **contradiction** [PRED] **contradiction** [COEFF] 10.2027

[P] A woman is sitting at a table waiting to tell a customer's fortune.

[H] A skier crashes into a tree.

[LABEL] **contradiction** [PRED] **contradiction** [COEFF] 10.1184

[P] Two girls walking on the street in shorts and sweatshirts.

[H] Two men in heavy winter coats trudge through the snow

[LABEL] **contradiction** [PRED] **contradiction** [COEFF] 9.8762

[P] A new mother holds her newborn baby in the hospital.

[H] The man punches his adolescent son before being taken away to jail

[LABEL] **contradiction** [PRED] **contradiction** [COEFF] 9.5838

[P] A young man wearing a red pokemon shirt carrying a small red box

[H] A guy is driving a batmobile

[LABEL] **contradiction** [PRED] **contradiction** [COEFF] 9.2823

[P] Several small children are playing basketball.

[H] A man is crushed by a red vehicle.

[LABEL] **contradiction** [PRED] **contradiction** [COEFF] 9.0611

[P] A young girl making a pattern to design clothes.

[H] Boy building log cabin with his father.

[LABEL] **contradiction** [PRED] **contradiction** [COEFF] 8.8026

[P] Two women and a man in a studio looking at a large portrait of cher.

[H] Three people are discussing the sports game.

[LABEL] **contradiction** [PRED] **contradiction** [COEFF] 8.5407

[P] A skier midair during what appears to be a daring flip on a sunny ski slope.

[H] A man driving a car.

[LABEL] **contradiction** [PRED] **contradiction** [COEFF] 8.4671

[P] A woman holding a pink balloon and wearing a fuzzy pink tiara, and a man with his head tilted slightly forward and smiling with his mouth wide open are standing next to one another.

[H] The man is riding a horse.

[LABEL] **contradiction** [PRED] **contradiction** [COEFF] 8.0755

[P] A brown - haired man with glasses is wearing a burgundy hooded sweatshirt while sitting at a dinner table checking his cellphone.

[H] A man is riding a turtle through the jungle.

### 1.380 Component 379

[LABEL] **neutral** [PRED] **contradiction** [COEFF] 99.1784

[P] A woman reads a book on a train.

[H] A tall human reading

[LABEL] **neutral** [PRED] **contradiction** [COEFF] 97.6121

[P] A woman wearing a yellow coat is skiing in the white snow.

[H] A tall human skiing

[LABEL] **neutral** [PRED] **contradiction** [COEFF] 90.7757

[P] A woman walks holding an umbrella.

[H] A tall human holding an umbrella

[LABEL] **neutral** [PRED] **contradiction** [COEFF] 89.5359

[P] A woman with no shirt rides a bike.

[H] A tall human with no shirt.

[LABEL] **neutral** [PRED] **contradiction** [COEFF] 89.4253

[P] A woman wearing a teal cardigan with a teal scarf and sunglasses on her head.

[H] A tall human with glasses

[LABEL] **neutral** [PRED] **contradiction** [COEFF] 89.3598

[P] A woman is standing in a booth, wearing an orange vest, proffering a credit card and smiling.

[H] A tall human standing

[LABEL] **neutral** [PRED] **contradiction** [COEFF] 89.0580

[P] A woman with a brown jacket walking near a sign outside.

[H] A tall human walking.

[LABEL] **neutral** [PRED] **contradiction** [COEFF] 83.3434

[P] Woman performing in beautiful white dress holding microphone and surrounded by musicians at a jazz festival.

[H] A tall human holding

[LABEL] **neutral** [PRED] **contradiction** [COEFF] 79.7755

[P] An older woman is cutting with scissors.

[H] A tall human cutting

[LABEL] **entailment** [PRED] **contradiction** [COEFF] 70.6990

[P] An asian woman in a green shirt and an apron is fixing some food inside a market.

[H] A human fixing

[LABEL] **neutral** [PRED] **contradiction** [COEFF] 69.1305

[P] A woman pounding something with a rock, with a guinea pig in the background.

[H] A tall human pounding

[LABEL] **neutral** [PRED] **contradiction** [COEFF] 67.8862

[P] A woman with blue hair is playing the guitar leaning against a blue wall.

[H] A human playing rock music

[LABEL] **neutral** [PRED] **contradiction** [COEFF] 66.6537

[P] A woman in black is sitting at a table with her forehead in her left hand as she writes in a note pad next to a white coffee cup.

[H] A tall human sitting

[LABEL] **neutral** [PRED] **contradiction** [COEFF] 66.1549

[P] A woman on a balcony aims her camera to take a picture.

[H] A tall human with a camera

[LABEL] **neutral** [PRED] **contradiction** [COEFF] 65.6709

[P] A woman and a dog playing outside



[H] A tall human playing

[LABEL] **entailment** [PRED] **contradiction** [COEFF] 65.3400

[P] An asian woman in a pink dress standing in the middle of a calm street with a somewhat melancholic expression on her face.

[H] A human standing

### 1.381 Component 380

[LABEL] **entailment** [PRED] **entailment** [COEFF] 11.3260

[P] A woman throwing a frisbee on a beach.

[H] A woman is playing on the sand.

[LABEL] **entailment** [PRED] **entailment** [COEFF] 8.8909

[P] A woman with brown hair preparing food in a kitchen.

[H] A woman is making food.

[LABEL] **entailment** [PRED] **entailment** [COEFF] 8.5214

[P] The lady in the red apron is preparing food for the up coming festivities.

[H] A woman is cooking.

[LABEL] **entailment** [PRED] **entailment** [COEFF] 8.2322

[P] A boy is catching an orange frisbee in front of a wooden gate.

[H] A boy is playing with a frisbee.

[LABEL] **entailment** [PRED] **entailment** [COEFF] 7.5183

[P] A child is on a slide.

[H] A child is playing.

[LABEL] **entailment** [PRED] **entailment** [COEFF] 7.4141

[P] Two men wearing uniforms, are trying to hit the same ball with wooden sticks.

[H] Two men are playing with sticks.

[LABEL] **neutral** [PRED] **entailment** [COEFF] 7.3596

[P] A man at work is doing a small welding job with a soldering tool.

[H] A man is making something.

[LABEL] **neutral** [PRED] **entailment** [COEFF] 7.2686

[P] A little boy shooting a basketball on a basketball court.

[H] A little boy is playing basketball.

[LABEL] **entailment** [PRED] **entailment** [COEFF] 7.0552

[P] A lady in a scarf placing rice down to roll sushi.

[H] A lady is preparing food.

[LABEL] **entailment** [PRED] **entailment** [COEFF] 7.0348

[P] A woman is dispensing something out of a fancy coffee maker.

[H] A woman is getting coffee.

[LABEL] **entailment** [PRED] **entailment** [COEFF] 7.0010

[P] A dog is catching a ball.

[H] The dog is playing

[LABEL] **entailment** [PRED] **entailment** [COEFF] 6.8384

[P] A man is in a store looking through shirts on a rack.

[H] There is a man shopping.

[LABEL] **entailment** [PRED] **entailment** [COEFF] 6.7004

[P] A person playing with a rock next to some dirty water.

[H] A person is playing near the water.

[LABEL] **entailment** [PRED] **entailment** [COEFF] 6.6943

[P] A young boy swings a large stick as a crowd watches.

[H] A young boy is playing with a stick.

[LABEL] **neutral** [PRED] **entailment** [COEFF] 6.6455

[P] A young person dressed in white is running toward a ball.

[H] A young person is playing sports.

[LABEL] **entailment** [PRED] **entailment** [COEFF] 6.4357

[P] A brown and white dog runs beside a wooden fence with a tennis ball in his mouth.

[H] A dog is playing with a ball.

## 1.382 Component 381

[LABEL] **contradiction** [PRED] **contradiction** [COEFF] 17.6202

[P] People in rowboat heading toward a setting sun.

[H] The people are walking

[LABEL] **contradiction** [PRED] **entailment** [COEFF] 17.1435

[P] A man in a white shirt rides a bicycle on a busy street.

[H] A man is walking on the street.

[LABEL] **contradiction** [PRED] **contradiction** [COEFF] 15.7182

[P] A person swims in a shallow turquoise sea toward an empty tethered rowboat.

[H] The person is walking on the water.

[LABEL] **contradiction** [PRED] **contradiction** [COEFF] 15.3434

[P] Two men racing down a street in a bicycle race.

[H] There were people going in the park walking.

[LABEL] **contradiction** [PRED] **contradiction** [COEFF] 14.9294

[P] A man wearing a blue shirt juggling.  
[H] A man is walking with his hands down.

[LABEL] entailment [PRED] contradiction [COEFF] 14.1821  
[P] A man pushing a cart near the subway.  
[H] A man is walking.

[LABEL] contradiction [PRED] contradiction [COEFF] 13.7099  
[P] A young woman wearing pink and black bike attire enjoys a ride through the country with a friend.  
[H] The young women is walking through the country side.

[LABEL] contradiction [PRED] contradiction [COEFF] 13.0023  
[P] Kid in sunglasses running  
[H] The kid is walking slowly.

[LABEL] contradiction [PRED] contradiction [COEFF] 12.9630  
[P] A group of people riding bicycles.  
[H] The people are walking down the road.

[LABEL] contradiction [PRED] contradiction [COEFF] 12.3535  
[P] Two men are riding horses, one horse is brown and one is black.  
[H] The men are walking through a field with their dogs.

[LABEL] contradiction [PRED] contradiction [COEFF] 12.2675  
[P] Kid running in a race with a baton.  
[H] The kid is walking nonchalantly.

[LABEL] contradiction [PRED] contradiction [COEFF] 12.0266  
[P] The child in the blue sweater is on a riding toy.  
[H] The child is walking in a park.

[LABEL] contradiction [PRED] contradiction [COEFF] 11.7592  
[P] Two men in a small boat rowing down a river.  
[H] Two men walk along the shore.

[LABEL] contradiction [PRED] contradiction [COEFF] 11.5905  
[P] Two men are playing cricket in front of a small crowd as one man prepares to hit the ball.  
[H] Two guys are walking around town.

[LABEL] contradiction [PRED] contradiction [COEFF] 11.4386  
[P] People on camels crossing desert horizon.  
[H] The people are walking.

[LABEL] contradiction [PRED] contradiction [COEFF] 11.2683  
[P] Two workers in a boat rake a pond  
[H] The men are walking by the pond.

### 1.383 Component 382

[LABEL] entailment [PRED] entailment [COEFF] 26.5096

[P] A barefooted man wearing olive green shorts grilling hotdogs on a small propane grill while holding a blue plastic cup.

[H] A man is making food.

[LABEL] entailment [PRED] entailment [COEFF] 19.7881

[P] The long - haired man is balancing on a drum that is being carried by men in white shirts.

[H] A man is being carried.

[LABEL] entailment [PRED] entailment [COEFF] 17.9752

[P] A man is sitting on a paddle boat waiting for someone to join him on the water.

[H] A person is in a boat.

[LABEL] entailment [PRED] entailment [COEFF] 17.7273

[P] Man talking on a phone, surrounded by books in an office.

[H] A man is in an office.

[LABEL] entailment [PRED] entailment [COEFF] 15.8826

[P] In a bowling alley, a man holding a green bowling ball looks ahead at the pins that he must knock down.

[H] A man is bowling.

[LABEL] entailment [PRED] entailment [COEFF] 15.6868

[P] A blond woman in sunglasses hold a digital camera while a brunette gazes off to the side.

[H] Woman with camera

[LABEL] entailment [PRED] entailment [COEFF] 15.2198

[P] The daughter admits that her mom is cool in her aviator sunglasses.

[H] A woman is wearing sunglasses.

[LABEL] entailment [PRED] entailment [COEFF] 15.0973

[P] A woman is directing a group of men and woman during singing class.

[H] A people are singing

[LABEL] entailment [PRED] entailment [COEFF] 15.0316

[P] A man in a blue shirt is in the distance at a bar.

[H] A man is at a bar.

[LABEL] neutral [PRED] entailment [COEFF] 14.7973

[P] A young man in a park setting has just made a slam dunk on a basketball hoop.

[H] A man is playing basketball.

[LABEL] entailment [PRED] entailment [COEFF] 14.5675

[P] A man in a furry white coat plays guitar while another man sings through a microphone.

[H] A man in a fur is making music.

[LABEL] entailment [PRED] entailment [COEFF] 14.4459

[P] A young male child in an orange dinosaur hoodie eats a snack inside of a shopping cart while leaning against a new, sealed comforter.

[H] A kid is eating something.

[LABEL] entailment [PRED] entailment [COEFF] 14.3329

[P] A man wearing a white shirt is selecting some green produce from a box at an outdoor market, while holding a blue basket in one hand.

[H] A man is holding a basket.

[LABEL] entailment [PRED] entailment [COEFF] 14.1599

[P] Woman being given a palm reading by a female psychic while two other women wait inside of a small shop.

[H] A person is performing a service.

[LABEL] entailment [PRED] entailment [COEFF] 13.9648

[P] Older man with long white hair is at a microphone

[H] A man is has long hair.

[LABEL] entailment [PRED] entailment [COEFF] 13.8930

[P] Two men in life jackets speed through the water in an orange motorboat.

[H] Men are in a boat.

### 1.384 Component 383

[LABEL] contradiction [PRED] contradiction [COEFF] 18.6002

[P] Four young boys are running down a sidewalk.

[H] Boys are playing in a grassy field.

[LABEL] contradiction [PRED] contradiction [COEFF] 16.4977

[P] An elderly man and women walk together past a jewelery store on the sidewalk.

[H] An elderly man and woman sit together in rocking chairs on their front porch.

[LABEL] contradiction [PRED] contradiction [COEFF] 15.9062

[P] Three women in hats walk down a sidewalk.

[H] Everybody is in the grass.

[LABEL] neutral [PRED] contradiction [COEFF] 15.7724

[P] Two women both wearing white shirts and black pants, one smoking sitting on a fixture on the sidewalk.

[H] Two semon sit in the park.

[LABEL] contradiction [PRED] contradiction [COEFF] 15.3228

[P] People riding mopeds down the street.

[H] People are riding mopeds in the park.

[LABEL] contradiction [PRED] contradiction [COEFF] 14.3830

[P] A worker walking down the street.

[H] A person walking through a field

[LABEL] contradiction [PRED] contradiction [COEFF] 13.6608

[P] A tall guy wearing a fedora hat, gray button shirt, black pants and messenger bag is walking on the sidewalk as he texts.

[H] A guy is jogging in the park away from the police.

[LABEL] contradiction [PRED] contradiction [COEFF] 12.7725

[P] A white and tan dog holding paper in its mouth while on tile floor

[H] A dog running across grass.

[LABEL] contradiction [PRED] contradiction [COEFF] 12.7395

[P] Two young females one in strip shirt and one in white shirt, both with jackets in hand walking down street.

[H] One female is walking through the forest.

[LABEL] neutral [PRED] contradiction [COEFF] 12.6302

[P] Two girls and a woman walking on the sidewalk

[H] A family walks down to the park

[LABEL] neutral [PRED] contradiction [COEFF] 12.5557

[P] Girls walking in the street on a sunny day.

[H] Girls walking to the park.

[LABEL] contradiction [PRED] contradiction [COEFF] 11.8397

[P] A man wearing a red clothing and a fez plays a stringed instrument on a brick sidewalk.

[H] A man plays a stringed instrument on a smooth grassy field.

[LABEL] contradiction [PRED] contradiction [COEFF] 11.6861

[P] A young person in black pants and a brown fedora uses their mobile device on a city sidewalk.

[H] A young man counts the eggs in his basket as he walks the trail.

[LABEL] neutral [PRED] contradiction [COEFF] 11.5958

[P] A man is standing on pavement holding a stick in his hand.

[H] A man is standing in the sun

[LABEL] contradiction [PRED] contradiction [COEFF] 11.5271

[P] A man in a orange vest is kneeling on the sidewalk.

[H] A man asleep in the park.

[LABEL] contradiction [PRED] contradiction [COEFF] 11.3482

[P] A girl in a pink jacket is walking through a large puddle.

[H] A girl runs through grass.

## 1.385 Component 384

[LABEL] **neutral** [PRED] **neutral** [COEFF] 31.3648

[P] An older lady in a black shirt is adding ingredients to a kitchenaid mixing bowl as a crowd looks on.

[H] The lady is teaching a cooking class.

[LABEL] **neutral** [PRED] **contradiction** [COEFF] 28.8141

[P] Two men pushing wheelbarrows, two men looking at them, they are in the desert near some block construction buildings.

[H] A group of four construction workers, two of which are on breaks.

[LABEL] **entailment** [PRED] **neutral** [COEFF] 27.2308

[P] A person in red is lying on a bench in a park, and two couples sit on other benches together.

[H] There are five people occupying park benches.

[LABEL] **entailment** [PRED] **neutral** [COEFF] 26.8732

[P] There is a man behind a white minivan, police car driving down the street as a white car pulls onto the street.

[H] Three vehicles are on a road.

[LABEL] **neutral** [PRED] **neutral** [COEFF] 26.3369

[P] A blond woman in an apron with cherries on it is spinning a pot on a potter's wheel.

[H] A blond lady is taking a class on pottery making with her two sisters.

[LABEL] **neutral** [PRED] **neutral** [COEFF] 23.7986

[P] A little girl and a man pose in their living room with power tools.

[H] The girl is helping her father build something.

[LABEL] **neutral** [PRED] **neutral** [COEFF] 23.0405

[P] A man in football gear is running with the football with an opposing team member not far behind him going in for a tackle.

[H] The player with the ball is running towards the end zone so he can score a touchdown.

[LABEL] **contradiction** [PRED] **neutral** [COEFF] 22.8109

[P] A professional basketball player in a cleveland cavaliers uniform is shooting a basket while a teammate guards him and two opponents wait for the rebound.

[H] Four men in matching outfits are playing basketball.

[LABEL] **neutral** [PRED] **neutral** [COEFF] 22.7194

[P] A male cyclist pulls ahead of the pack wearing gray, white and red riding gear, a helmet and sunglasses.

[H] The cyclist is young

[LABEL] **entailment** [PRED] **neutral** [COEFF] 22.0378

[P] Five individuals holding instruments and practicing music together next to a building.

[H] The five people are part of the same band.

[LABEL] **neutral** [PRED] **neutral** [COEFF] 21.8252

[P] A young girl colors on a paper using a blue colored pencil.

[H] The girl is coloring in a picture she drew.

[LABEL] **neutral** [PRED] **neutral** [COEFF] 21.3235

[P] A construction worker, with a red hard hat, assemble a giant man statue.

[H] The art installation is new.

[LABEL] **neutral** [PRED] **neutral** [COEFF] 21.1911

[P] A woman with a child in her arms and a boy at her side facing towards a body of water.

[H] A woman takes her children to a beach.

[LABEL] **neutral** [PRED] **neutral** [COEFF] 21.1183

[P] A group of people is in a station house where thomas the tank engine is in front of them.

[H] The people are visiting a train museum.

[LABEL] **entailment** [PRED] **neutral** [COEFF] 20.9962

[P] One bear has fur that sticks up on its back resembling a mohawk.

[H] The bear looks like it has a mowhawk

[LABEL] **neutral** [PRED] **neutral** [COEFF] 20.8843

[P] People are sitting on a ledge on the side of a street, the girl in the front has high heels on.

[H] The people are wearing glasses.

### 1.386 Component 385

[LABEL] **entailment** [PRED] **entailment** [COEFF] 39.3022

[P] People sit in chairs at a park with a dog.

[H] The people are sitting.

[LABEL] **entailment** [PRED] **entailment** [COEFF] 32.6739

[P] Two small boys sit on a bench near a carnival ride.

[H] Two boys are sitting.

[LABEL] **entailment** [PRED] **entailment** [COEFF] 32.2149

[P] Many people sitting in chairs at a presentation.

[H] Many people are sitting

[LABEL] **entailment** [PRED] **entailment** [COEFF] 31.5895

[P] A big group of people sitting in the dark.

[H] The people are sitting.

[LABEL] **entailment** [PRED] **entailment** [COEFF] 30.6902

[P] Two people are sitting below the walking sign.

[H] The people are sitting.

[LABEL] **entailment** [PRED] **entailment** [COEFF] 30.5155



[P] A man sitting on a windowsill.

[H] The man is sitting

[LABEL] **entailment** [PRED] **entailment** [COEFF] 28.4748

[P] Girls sitting around a fire.

[H] The girls are sitting.

[LABEL] **entailment** [PRED] **entailment** [COEFF] 28.1456

[P] Woman sits on a bed in a fashion clothing shop.

[H] The woman is sitting.

[LABEL] **entailment** [PRED] **entailment** [COEFF] 28.0491

[P] A big room of people is sitting at a mass lunch.

[H] The people are sitting.

[LABEL] **entailment** [PRED] **entailment** [COEFF] 27.0655

[P] Three dark complected ladies sitting on a bench in front of a yellow ceramic tiled wall, with the name " jane " on the wall or superimposed onto the image above them.

[H] Three women are sitting.

[LABEL] **contradiction** [PRED] **entailment** [COEFF] 26.1792

[P] Several people dressed in red are sitting and standing on grass.

[H] People are sitting.

[LABEL] **entailment** [PRED] **entailment** [COEFF] 25.6905

[P] Two women sitting on a black sofa with clothes and a purse in between them.

[H] Two women are sitting

[LABEL] **entailment** [PRED] **entailment** [COEFF] 25.0828

[P] A woman sitting against a wall behind a pane of glass.

[H] Someone is sitting.

[LABEL] **entailment** [PRED] **entailment** [COEFF] 24.7749

[P] Five people sitting down.

[H] People are sitting.

[LABEL] **entailment** [PRED] **entailment** [COEFF] 23.0127

[P] Four people are sitting around a table talking.

[H] Four people are sitting.

[LABEL] **entailment** [PRED] **entailment** [COEFF] 22.6736

[P] A woman sitting in the background at a table

[H] The woman is sitting.

### 1.387 Component 386

[LABEL] **contradiction** [PRED] **contradiction** [COEFF] 5.8846

[P] A basketball game

[H] A volleyball game.

[LABEL] **contradiction** [PRED] **contradiction** [COEFF] 4.3182

[P] A woman in patterned blue jeans and a green sweater walks away whilst carrying a brown plastic bag.

[H] A woman in patterned blue jeans and a red sweater walks away whilst carrying a white bag.

[LABEL] **contradiction** [PRED] **contradiction** [COEFF] 4.1246

[P] Young man wearing hairnet on head and face

[H] An old man wearing a hairnet.

[LABEL] **contradiction** [PRED] **contradiction** [COEFF] 4.0831

[P] A boy in a blue jacket on a subway train.

[H] A boy in a red jacket on the subway platform.

[LABEL] **contradiction** [PRED] **contradiction** [COEFF] 3.8891

[P] A girl in a black shirt is looking to the side while sitting on a wooden bench.

[H] A girl in a red shirt is eating some ice cream.

[LABEL] **contradiction** [PRED] **contradiction** [COEFF] 3.7970

[P] Soccer player kneeling down to tie her shoe.

[H] Basketball player kneeling down to tie her shoe.

[LABEL] **contradiction** [PRED] **contradiction** [COEFF] 3.6612

[P] Three children in a field, looking up at the sky.

[H] Three men in a field, looking up at the sky.

[LABEL] **contradiction** [PRED] **contradiction** [COEFF] 3.6516

[P] Women in costumes on a street.

[H] Men in costumes on a street.

[LABEL] **contradiction** [PRED] **contradiction** [COEFF] 3.4961

[P] A hockey player with warrior equipment with a look of apprehension on his place

[H] A soccer player with warrior equipment with a look of apprehension on his place

[LABEL] **contradiction** [PRED] **contradiction** [COEFF] 3.4898

[P] A black dog runs and, focusing on something.

[H] A black cat runs and, focusing on something.

[LABEL] **contradiction** [PRED] **contradiction** [COEFF] 3.4784

[P] Woman making a sand castle at the beach.

[H] Man making a sand castle.

[LABEL] **contradiction** [PRED] **contradiction** [COEFF] 3.4614

[P] Three young people are snuggling under a blanket on a sidewalk.  
[H] Twenty young people are snuggling under a blanket on a sidewalk.

[LABEL] **contradiction** [PRED] **contradiction** [COEFF] 3.4251  
[P] A protester holding a sign.  
[H] A person is holding a basket of flowers.

[LABEL] **contradiction** [PRED] **contradiction** [COEFF] 3.4007  
[P] A baseball player in blue scoring run by crossing home plate.  
[H] A baseball player in red scoring run by crossing home plate.

[LABEL] **contradiction** [PRED] **contradiction** [COEFF] 3.3739  
[P] Two men siting down and having a beer.  
[H] Two children siting down and having a beer

[LABEL] **contradiction** [PRED] **contradiction** [COEFF] 3.3129  
[P] Time lapse photo of two children playing in a pool of water.  
[H] Time lapse photo of two children skateboarding.

### 1.388 Component 387

[LABEL] **neutral** [PRED] **contradiction** [COEFF] 8.2324  
[P] A person standing under an umbrella looking at buildings.  
[H] A guy out in the rain.

[LABEL] **contradiction** [PRED] **contradiction** [COEFF] 6.0576  
[P] A woman jumping in a field on a sunny day.  
[H] A female running down a small dirt road on a rainy day.

[LABEL] **neutral** [PRED] **contradiction** [COEFF] 5.9285  
[P] Two people are standing on the slopes of a mountain and they have a dog with them.  
[H] The people are in the snow.

[LABEL] **contradiction** [PRED] **contradiction** [COEFF] 5.4570  
[P] A baby boy is sitting in the baby swing at a park.  
[H] A young boy is playing outside in a snowstorm.

[LABEL] **contradiction** [PRED] **contradiction** [COEFF] 5.2019  
[P] A man and a brown dog in motion in the grass.  
[H] A guy frolics with his dog in the snow.

[LABEL] **contradiction** [PRED] **contradiction** [COEFF] 5.1610  
[P] Children are playing with leaves in the autumn.  
[H] Children play in the snow in winter.

[LABEL] **contradiction** [PRED] **contradiction** [COEFF] 4.9181

[P] Two children with a yellow and blue umbrella play in the bathtub.  
[H] The kids are playing in the rain.

[LABEL] **contradiction** [PRED] **contradiction** [COEFF] 4.8925  
[P] A colorfully dressed person is hula - hooping in a downtown area.  
[H] A person is begging for money on the highway.

[LABEL] **neutral** [PRED] **contradiction** [COEFF] 4.8785  
[P] A young man leaps through the air from a rocky mountaintop.  
[H] A man is leaping towards the snow.

[LABEL] **contradiction** [PRED] **contradiction** [COEFF] 4.8411  
[P] A man skateboard down a railing.  
[H] A man is snowboarding.

[LABEL] **entailment** [PRED] **contradiction** [COEFF] 4.7579  
[P] Two hikers stopping to take a smoke break on the trail.  
[H] Two people on the side of a dirt road.

[LABEL] **contradiction** [PRED] **contradiction** [COEFF] 4.7365  
[P] A man in a yellow sweater catching a frisbee.  
[H] A man catching a grenade thrown at him.

[LABEL] **contradiction** [PRED] **contradiction** [COEFF] 4.5052  
[P] A person wearing blue rubber gloves is loading a syringe with vegetables.  
[H] A person is putting meat in a syringe.

[LABEL] **contradiction** [PRED] **contradiction** [COEFF] 4.4163  
[P] There are a few people strolling along a large oceanside walkway.  
[H] A few people stroll in the hallways of a large mall.

[LABEL] **contradiction** [PRED] **contradiction** [COEFF] 4.2946  
[P] A food vendor holds up a bag of snacks and a bottle as he stands in the crowd at a sports venue.  
[H] The man is buying a bottle of beer at a bar.

[LABEL] **contradiction** [PRED] **contradiction** [COEFF] 4.2009  
[P] A person is eating a plate of pasta with a black and brown dog on his or her lap.  
[H] A person eats a large hamburger.

### 1.389 Component 388

[LABEL] **neutral** [PRED] **neutral** [COEFF] 26.2581  
[P] Two men look out as one is holding binoculars.  
[H] The man decided to pass his binoculars to his friend

[LABEL] **neutral** [PRED] **neutral** [COEFF] 19.7579

[P] A teenage boy is sitting on a dock in a chair, with a fishing pole in his hand.

[H] The boy is all set up to spend the entire day fishing with his best friend.

[LABEL] *neutral* [PRED] *neutral* [COEFF] 19.5930

[P] A man is wearing a red shirt and vest.

[H] A man is trying on his friend's vest to see if it fits.

[LABEL] *neutral* [PRED] *neutral* [COEFF] 19.5400

[P] Various elevators with people inside a hotel

[H] The people wait for the elevator to come to them.

[LABEL] *neutral* [PRED] *neutral* [COEFF] 19.5113

[P] The young boy by the pool is eating an apple.

[H] The boy ate gleefully as he prepared to nail the neighbors' betty with the apple core.

[LABEL] *neutral* [PRED] *neutral* [COEFF] 19.2825

[P] A man in blue coat, a red plaid shirt, and a sailor hat, sits on a park bench next to a bicycle.

[H] The man is going to ride his bike back home.

[LABEL] *neutral* [PRED] *neutral* [COEFF] 16.6252

[P] A little boy is wearing a blue and white shirt while holding a toy animal that is either a crocodile or an alligator.

[H] A little boy at the zoo stares unbelievably at an alligator thinking it's his toy animal he left at home

[LABEL] *neutral* [PRED] *neutral* [COEFF] 16.3047

[P] A little boy looks at a pinata while holding a stick.

[H] A boy on his birthday is about to strike a pinata with a stick.

[LABEL] *neutral* [PRED] *neutral* [COEFF] 16.2136

[P] A young boy with a blue umbrella waits outside a shop.

[H] The boy was given this umbrella by their parents.

[LABEL] *neutral* [PRED] *neutral* [COEFF] 16.0605

[P] An artist wearing a red and black sweater painting a mural on the side of a brick building.

[H] The artist completes his third mural on a building just before running out of paint.

[LABEL] *neutral* [PRED] *neutral* [COEFF] 15.9855

[P] A male vendor trying to sell beautiful roses to a young woman on the street.

[H] The vendor is trying to sell flowers to the beautiful woman but he is really hoping to get her phone number.

[LABEL] *neutral* [PRED] *neutral* [COEFF] 15.9760

[P] An older man stands next to a woman who is laughing.

[H] The man just tickled the lady to make her laugh.

[LABEL] *neutral* [PRED] *neutral* [COEFF] 15.8536

[P] A guy with a red shirt and black apron on working standing with his hand in a shopping cart.  
[H] The man is moving the shopping carts to a new location.

[LABEL] **neutral** [PRED] **neutral** [COEFF] 15.7674  
[P] Two men are walking along side the ocean carrying a fishing pole.  
[H] They are just starting their day

[LABEL] **contradiction** [PRED] **neutral** [COEFF] 15.6990  
[P] Firemen preparing to handle a situation at a company.  
[H] The firemen are parking their truck at the station.

[LABEL] **neutral** [PRED] **neutral** [COEFF] 15.6140  
[P] A child plays on a rope ladder.  
[H] The child pretends the rope ladder goes to a castle

### 1.390 Component 389

[LABEL] **contradiction** [PRED] **entailment** [COEFF] 9.3664  
[P] Two little girls wearing pink dresses and sandals  
[H] Two little girls wearing pink dresses and sandals

[LABEL] **entailment** [PRED] **entailment** [COEFF] 9.1437  
[P] A person in colorful clothes and a hat embellished with red and pink streamers looks out from a thatched enclosure.  
[H] A person in colorful clothes looks out from a thatched enclosure

[LABEL] **entailment** [PRED] **entailment** [COEFF] 8.5367  
[P] A very well dressed man standing in the middle of a room with lots of casually dressed people.  
[H] A very well dressed man is standing in the middle of a room of casuals.

[LABEL] **entailment** [PRED] **entailment** [COEFF] 7.1627  
[P] A woman smiles from inside a red tent that is surrounded by snow.  
[H] A woman smiles from inside a red tent

[LABEL] **entailment** [PRED] **entailment** [COEFF] 6.5918  
[P] A group of children plays in a large fountain.  
[H] A group of children playing in large fountain

[LABEL] **entailment** [PRED] **entailment** [COEFF] 6.5227  
[P] A teenager sitting on the steps deep in thought.  
[H] A teenager sitting on the steps deep in thought.

[LABEL] **entailment** [PRED] **entailment** [COEFF] 6.2450  
[P] A crowd of women dressed in colorful saris are sitting in muddy water while one of them washes with water.  
[H] A crowd of women are dressed in colorful saris.

[LABEL] entailment [PRED] entailment [COEFF] 6.1810

[P] A woman showing a long - haired, large black pedigree dog at a dog show.

[H] The woman is showing a long - haired, large black pedigree dog at a dog show.

[LABEL] neutral [PRED] entailment [COEFF] 6.1562

[P] An old man stands in front of a building front papered with election signs.

[H] An old man stands in front of a building front papered with old election signs.

[LABEL] entailment [PRED] entailment [COEFF] 6.0910

[P] A person wearing a colorful short - sleeved shirt and holding some sort of cloth raises both hands above his or her head.

[H] A person wearing a colorful short - sleeved shirt and holding some sort of cloth

[LABEL] entailment [PRED] entailment [COEFF] 5.9367

[P] A man stands behind some merchandise in an area with lots of candles.

[H] A man stands behind merchandise in an area with candles.

[LABEL] entailment [PRED] entailment [COEFF] 5.5954

[P] Woman crossing the street at a crosswalk with multiple bags in her hands.

[H] Woman with multiple bags in her hands is crossing the street at a crosswalk.

[LABEL] entailment [PRED] entailment [COEFF] 5.5408

[P] A man in a hat is laughing.

[H] A man in a hat is laughing

[LABEL] entailment [PRED] entailment [COEFF] 5.4246

[P] Two girls are cleaning the floor with a dustpan and broom.

[H] Two girls sweep the floor with a dustpan and broom.

[LABEL] entailment [PRED] entailment [COEFF] 5.2737

[P] A woman in a red coat drinking coffee.

[H] A woman wearing a red coat is drinking coffee.

[LABEL] entailment [PRED] entailment [COEFF] 5.2073

[P] A skier in red pants is on a snow covered slope.

[H] A skier is on a snow covered slope and wearing red pants.

### 1.391 Component 390

[LABEL] entailment [PRED] entailment [COEFF] 6.2274

[P] A small child sliding down a snowy hill.

[H] A child slides down a hill in the snow.

[LABEL] entailment [PRED] entailment [COEFF] 5.6116

[P] A kid attempting to squeeze through a metal fence.

[H] A kid tries to squeeze through a fence.

[LABEL] entailment [PRED] entailment [COEFF] 5.3620  
[P] A man with a backpack over his shoulders is walking through a forest.  
[H] A man walks through the forest.

[LABEL] entailment [PRED] entailment [COEFF] 5.3533  
[P] A person dances along a high rock surface nearby the tops of tree - lined areas.  
[H] A person dances along a rock surface.

[LABEL] entailment [PRED] entailment [COEFF] 5.0972  
[P] Workers walk along railroad tracks entering a tunnel.  
[H] Workers walk along railroad tracks.

[LABEL] entailment [PRED] entailment [COEFF] 4.8978  
[P] A man in bright green pants lazily walking down a hallway.  
[H] A man walks down a hallway.

[LABEL] entailment [PRED] entailment [COEFF] 4.8613  
[P] A middle eastern couple walking down the street.  
[H] A couple walk down the street.

[LABEL] entailment [PRED] entailment [COEFF] 4.8036  
[P] A group of marchers walking down the street  
[H] A group walks down the street.

[LABEL] entailment [PRED] entailment [COEFF] 4.7670  
[P] Three bikers pedal up a forest trail.  
[H] Cyclists ride up a trail.

[LABEL] entailment [PRED] entailment [COEFF] 4.7383  
[P] Two people dig on a shore where many boats are moored.  
[H] Two people dig on the shore.

[LABEL] entailment [PRED] entailment [COEFF] 4.6914  
[P] Two girls are running down a country road toward a blue sky.  
[H] Girls running down a road.

[LABEL] entailment [PRED] entailment [COEFF] 4.5993  
[P] Marathon runners are running past a glass building.  
[H] Runners go past a glass buildings.

[LABEL] entailment [PRED] entailment [COEFF] 4.4272  
[P] A person wearing a snowboard and coat going down stairs.  
[H] Someone is going down the stairs.

[LABEL] entailment [PRED] entailment [COEFF] 4.3174  
[P] A climber on some rocks.



[H] A climber climbs on some rocks

[LABEL] **entailment** [PRED] **entailment** [COEFF] 4.3028

[P] A decorated car headed down the street.

[H] A car headed down the street.

[LABEL] **entailment** [PRED] **entailment** [COEFF] 4.2562

[P] A group of race buggies travel down a racetrack.

[H] Race buggies travel down a racetrack

### 1.392 Component 391

[LABEL] **neutral** [PRED] **entailment** [COEFF] 16.1647

[P] An athletic man waterskis on a lake.

[H] A fit man is having fun.

[LABEL] **entailment** [PRED] **entailment** [COEFF] 15.1171

[P] Two elderly women with gray hair engaging in conversation.

[H] Two women are conversing.

[LABEL] **entailment** [PRED] **entailment** [COEFF] 13.3763

[P] The water is very calm.

[H] The water is still.

[LABEL] **entailment** [PRED] **entailment** [COEFF] 12.0551

[P] The band is setting up for their performance.

[H] People getting ready.

[LABEL] **entailment** [PRED] **entailment** [COEFF] 11.8795

[P] Three person are discussing something.

[H] People are communicating.

[LABEL] **neutral** [PRED] **entailment** [COEFF] 11.6671

[P] Two men are talking on their cellphones while in an alleyway.

[H] Men are conversating in an alleyway.

[LABEL] **entailment** [PRED] **entailment** [COEFF] 11.1094

[P] Several people play and relax on the beach.

[H] There are several people outdoors.

[LABEL] **entailment** [PRED] **entailment** [COEFF] 10.8247

[P] The children are singing and holding their arms in the air.

[H] A group of kids are doing something together.

[LABEL] **neutral** [PRED] **entailment** [COEFF] 10.6545

[P] Little kids with colorful skirts over their clothes are dancing.

[H] Kids are moving about to the music.

[LABEL] **entailment** [PRED] **entailment** [COEFF] 10.6111

[P] Two men have a conversation by an outdoor sewing - machine.

[H] People converse outside.

[LABEL] **entailment** [PRED] **entailment** [COEFF] 10.2730

[P] A group of people, old and young, men and women, sit around a table doing arts and crafts.

[H] A group of people engage in creative activities

[LABEL] **entailment** [PRED] **entailment** [COEFF] 9.5831

[P] Five people are jumping in the air for a photo opportunity in front of a fountain.

[H] A group of people move in sync for a photo.

[LABEL] **entailment** [PRED] **entailment** [COEFF] 9.4240

[P] Two men are having a conversation.

[H] A couple of men are conversing.

[LABEL] **entailment** [PRED] **entailment** [COEFF] 9.4203

[P] Two young women clap their hands in laughter.

[H] Two women are happy.

[LABEL] **entailment** [PRED] **entailment** [COEFF] 9.3604

[P] These people are relaxing in the tall grass.

[H] A couple taking in nature.

[LABEL] **entailment** [PRED] **entailment** [COEFF] 9.1389

[P] This african - american man is talking on the phone.

[H] A man is communicating

### 1.393 Component 392

[LABEL] **contradiction** [PRED] **contradiction** [COEFF] 18.2973

[P] A female swimmer in a black bathing suit about to jump off the racing platform into a pool.

[H] The swimmer is studying for her math test at the library.

[LABEL] **contradiction** [PRED] **contradiction** [COEFF] 15.7407

[P] A white dog, two black dogs, and a black and white dog are playing on the edge of a baseball field.

[H] The dogs are inside at the dog training class

[LABEL] **contradiction** [PRED] **contradiction** [COEFF] 13.2528

[P] A woman in a colorful dress and headscarf displays mounds of fresh vegetables on a street.

[H] The woman is baking a cake in her home.

[LABEL] **contradiction** [PRED] **contradiction** [COEFF] 12.1304

[P] Two girls playing at the beach one in pink and the other in black.

[H] They are in the classroom taking a test

[LABEL] **contradiction** [PRED] **neutral** [COEFF] 11.2456

[P] A dog wearing a green sweater and fanny pack walks on a snow - covered field.

[H] The dog is at home playing catch with his owner.

[LABEL] **contradiction** [PRED] **contradiction** [COEFF] 10.9729

[P] A woman with brown hair and wearing a black hat is looking in a microscope and writing something down.

[H] The woman is in the beauty salon having her hair and nails done

[LABEL] **neutral** [PRED] **neutral** [COEFF] 10.4993

[P] Seven children, three of which are riding bicycles traveling along a dirt path in a rural setting with a mountain in the background.

[H] The kids are going home from a day on the mountain.

[LABEL] **neutral** [PRED] **neutral** [COEFF] 10.1334

[P] A man wearing work boots and a helmet is driving his motorcycle.

[H] The man is on his way home from work.

[LABEL] **neutral** [PRED] **neutral** [COEFF] 10.0804

[P] A blond woman in an apron with cherries on it is spinning a pot on a potter's wheel.

[H] A blond lady is taking a class on pottery making with her two sisters.

[LABEL] **neutral** [PRED] **neutral** [COEFF] 9.9952

[P] There is a little boy in a red jacket walking down the railroad tracks and holding a stick.

[H] A little boy is taking the shortcut home after playing ball with his friends all afternoon.

[LABEL] **contradiction** [PRED] **contradiction** [COEFF] 9.6385

[P] An elderly lady with a young girl are sitting, surrounded by newspapers cigarettes and candy.

[H] The lady and the girl are taking a walk to the library.

[LABEL] **neutral** [PRED] **neutral** [COEFF] 9.5429

[P] Two babies look up while they are playing in a playpen with a lot of balls.

[H] Two babies look up to there parents after meeting for the first time.

[LABEL] **contradiction** [PRED] **contradiction** [COEFF] 9.5014

[P] A man is standing in the doorway of a building containing a garage door painted with " no parking.  
"

[H] The man is watching tv in the living room

[LABEL] **neutral** [PRED] **neutral** [COEFF] 9.3389

[P] A young boy wearing a blue shirt and a red helmet riding a bike on a sidewalk

[H] A boy is on his way home.

[LABEL] **contradiction** [PRED] **contradiction** [COEFF] 9.3077

[P] A brown - haired man wearing glasses, a dark polo shirt and jeans sits in front of a piano while reading.

[H] The man is in the kitchen getting something to eat.

[LABEL] **contradiction** [PRED] **contradiction** [COEFF] 9.1946

[P] Father teaches her daughter to cook on a camping trip.

[H] The father and the girl are watching television at home.

### 1.394 Component 393

[LABEL] **entailment** [PRED] **entailment** [COEFF] 26.7342

[P] Two women sit on the beach in holes seem to be digging for something with rocks and sand all around them.

[H] There are women on the beach.

[LABEL] **entailment** [PRED] **entailment** [COEFF] 23.7103

[P] Five young girls wading and splashing in a shallow pool.

[H] There are girls in a pool.

[LABEL] **entailment** [PRED] **entailment** [COEFF] 22.6981

[P] Two small children are talking in a field in front of a yellow caution tape.

[H] There are children in the field.

[LABEL] **entailment** [PRED] **entailment** [COEFF] 22.0254

[P] Three young girls in white dresses run in a park.

[H] There are girls in a park.

[LABEL] **entailment** [PRED] **entailment** [COEFF] 21.7210

[P] Five boats out by the marina area.

[H] There are boats in the marina area.

[LABEL] **entailment** [PRED] **entailment** [COEFF] 21.1960

[P] One shirtless man is taking pictures of the other people in the road, one of which is skateboarding, while a woman watches from across the road.

[H] There are people in the road.

[LABEL] **entailment** [PRED] **entailment** [COEFF] 20.5939

[P] Four women are outdoors relaxing in a hot tub.

[H] There are women in a hot tub.

[LABEL] **entailment** [PRED] **entailment** [COEFF] 20.4730

[P] Kites are flying high on a beach with many people wearing bathing suits.

[H] There are people are on the beach.

[LABEL] **entailment** [PRED] **entailment** [COEFF] 20.2893

[P] Two people wearing coats are playing an " airgame ".

[H] There are people in a game.

[LABEL] **entailment** [PRED] **entailment** [COEFF] 19.8723

[P] 2 people playing basketball both in midair.

[H] There are people playing basketball.

[LABEL] **entailment** [PRED] **entailment** [COEFF] 19.5292

[P] Two people with hiking gear at a checkpoint on a mountain.

[H] There are people on the mountain.

[LABEL] **entailment** [PRED] **entailment** [COEFF] 19.3683

[P] Four girls in a swimming pool the one getting ready to jump in.

[H] There are girls in the pool.

[LABEL] **entailment** [PRED] **entailment** [COEFF] 19.3523

[P] A woman is sitting on a beach with her shoes off and on a cellphone talking, scratching her shoulder, while a group of 5 other people are walking in the background.

[H] There are people at the beach.

[LABEL] **entailment** [PRED] **entailment** [COEFF] 19.3208

[P] Group of people sitting on beach, facing the ocean.

[H] There are people on the beach.

[LABEL] **entailment** [PRED] **entailment** [COEFF] 19.2508

[P] Three boys jumping off of a platform.

[H] There are boys jumping.

[LABEL] **entailment** [PRED] **entailment** [COEFF] 19.1656

[P] Four asian girls are walking through a locker room.

[H] There are girls.

### 1.395 Component 394

[LABEL] **contradiction** [PRED] **contradiction** [COEFF] 46.7351

[P] A dog runs down a footbride in the fall.

[H] A cat runs down a footbride in the fall.

[LABEL] **contradiction** [PRED] **contradiction** [COEFF] 46.3614

[P] A dog sits still while looking at large rocks.

[H] A cat is sitting on a rock.

[LABEL] **contradiction** [PRED] **contradiction** [COEFF] 45.9759

[P] A dog leaping into the water near a motorboat.

[H] A cat leaping into the water near a motorboat.

[LABEL] **contradiction** [PRED] **contradiction** [COEFF] 43.0740

[P] A dog is playing with a hose.

[H] The cat is playing with a hsoe.

[LABEL] contradiction [PRED] contradiction [COEFF] 42.3158  
[P] A large gray dog is jumping over a white hurdle.  
[H] A cat is jumping over a white hurdle.

[LABEL] contradiction [PRED] contradiction [COEFF] 41.9873  
[P] A dog with sharp teeth is chewing on a stick outside.  
[H] The cat is chewing on a stick.

[LABEL] contradiction [PRED] contradiction [COEFF] 41.0328  
[P] A dog walking through the water at the ocean.  
[H] A cat walking through the water at the ocean.

[LABEL] contradiction [PRED] contradiction [COEFF] 40.8122  
[P] A dog in a " superman " shirt sleeps on a blanket.  
[H] A cat sleeping on a blanket.

[LABEL] contradiction [PRED] contradiction [COEFF] 40.0397  
[P] A dog is chewing on a big branch.  
[H] A cat chews on a branch.

[LABEL] contradiction [PRED] contradiction [COEFF] 38.9800  
[P] A dog leaps high to catch a ball.  
[H] A cat catching a frisbee.

[LABEL] contradiction [PRED] contradiction [COEFF] 38.4326  
[P] The dog leaps into the air in a field.  
[H] The cat leaps in the air.

[LABEL] contradiction [PRED] contradiction [COEFF] 38.3306  
[P] A dog with its mouth open is running.  
[H] A cat is running.

[LABEL] contradiction [PRED] contradiction [COEFF] 38.1113  
[P] A brown fluffy dog lays in the snow with its green ball.  
[H] A cat is laying in the snow.

[LABEL] contradiction [PRED] contradiction [COEFF] 37.9140  
[P] A black dog jumps in the air to catch a toy.  
[H] A black cat jumps in the air to catch a toy.

[LABEL] contradiction [PRED] contradiction [COEFF] 37.3727  
[P] A black dog runs and, focusing on something.  
[H] A black cat runs and, focusing on something.

[LABEL] contradiction [PRED] contradiction [COEFF] 36.9867  
[P] A dog staring at the end of an ice cream cone.  
[H] The cat eats the ice cream

## 1.396 Component 395

[LABEL] **neutral** [PRED] **neutral** [COEFF] 44.4329

[P] A group of people are sitting on a bus.

[H] People are talking on the bus.

[LABEL] **neutral** [PRED] **neutral** [COEFF] 36.1784

[P] Three asian girls sitting on bench

[H] Three girls sit on a bench talking.

[LABEL] **neutral** [PRED] **neutral** [COEFF] 35.9949

[P] Two children walk down a path into the woods.

[H] Some kids are talking quietly.

[LABEL] **neutral** [PRED] **neutral** [COEFF] 33.7259

[P] An older man in a red sweatshirt stands in front of a group of children sitting on benches in front of him.

[H] Old man talking to children

[LABEL] **neutral** [PRED] **neutral** [COEFF] 33.1419

[P] A group of people walking through a wooded park.

[H] The people are talking to each other.

[LABEL] **neutral** [PRED] **neutral** [COEFF] 29.9034

[P] A woman standing by a wire fence on a sidewalk.

[H] The woman is talking to someone.

[LABEL] **entailment** [PRED] **neutral** [COEFF] 28.7048

[P] Men in short - sleeved shirts are gathered around a table in a meat shop.

[H] Men in short - sleeved shirts are gathered around a table in a meat shop, talking.

[LABEL] **neutral** [PRED] **neutral** [COEFF] 26.8609

[P] People walking down sidewalk next to a line of stores.

[H] The people are chatting while walking.

[LABEL] **neutral** [PRED] **neutral** [COEFF] 24.7665

[P] A group of people eating a meal at tables set up on a street.

[H] A group of people are talking while they eat.

[LABEL] **entailment** [PRED] **neutral** [COEFF] 24.6201

[P] Two middle eastern men on cellphones.

[H] The two men are talking.

[LABEL] **entailment** [PRED] **neutral** [COEFF] 24.4419

[P] A woman wearing a red flowered shawl is on her cellphone while carrying a little girl in a pink dress.

[H] The woman is talking on her cellphone.

[LABEL] **neutral** [PRED] **neutral** [COEFF] 24.0971  
 [P] A man in a yellow shirt has his head and arms in an attic opening.  
 [H] The man is talking with another person.

[LABEL] **neutral** [PRED] **neutral** [COEFF] 23.9753  
 [P] Four men wait with their wares on display in a desert.  
 [H] Four men talk while they wait with their wares on display.

[LABEL] **neutral** [PRED] **neutral** [COEFF] 22.9759  
 [P] A group of people sitting at an outdoor table eating food and drinking alcoholic beverages.  
 [H] The people are chatting with one another.

[LABEL] **neutral** [PRED] **neutral** [COEFF] 22.4927  
 [P] A young couple is sitting on a sidewalk with their helmets, in front of a motor scooter.  
 [H] A young couple sitting on a sidewalk in front of a motor scooter talking.

[LABEL] **entailment** [PRED] **neutral** [COEFF] 22.3598  
 [P] A man in the city on a cellphone.  
 [H] A man talks on his cellphone.

### 1.397 Component 396

[LABEL] **contradiction** [PRED] **contradiction** [COEFF] 19.2178  
 [P] A young couple showing affection in front of a beer advertisement.  
 [H] There is no advertisement

[LABEL] **contradiction** [PRED] **contradiction** [COEFF] 18.4529  
 [P] Three people are surfing and splashing in some water.  
 [H] There is no water.

[LABEL] **contradiction** [PRED] **contradiction** [COEFF] 17.8587  
 [P] A young overlooks a city street from a balcony.  
 [H] There is no balcony.

[LABEL] **contradiction** [PRED] **contradiction** [COEFF] 17.0447  
 [P] A dark - haired woman in a green and white apron sits amid her outdoor display of flowers for sale on a city street.  
 [H] The woman has no flowers.

[LABEL] **contradiction** [PRED] **contradiction** [COEFF] 17.0257  
 [P] A woman making a surprised face while holding her child.  
 [H] There are no children.

[LABEL] **contradiction** [PRED] **contradiction** [COEFF] 16.8505  
 [P] A man sips his drink from a mug at an outdoor cafe.  
 [H] The cafe does not have any mugs.



[LABEL] **contradiction** [PRED] **contradiction** [COEFF] 14.8486

[P] At a party, an entertainer provides amusement to children in the form of balloon animals.

[H] There are no children at this party.

[LABEL] **contradiction** [PRED] **contradiction** [COEFF] 14.6447

[P] A young boy sleeping after playing with his friends.

[H] The boy has no friends.

[LABEL] **contradiction** [PRED] **contradiction** [COEFF] 14.2154

[P] Two construction workers are standing behind a fence with an orange moped in the fore - ground.

[H] There is no moped.

[LABEL] **contradiction** [PRED] **contradiction** [COEFF] 13.8707

[P] A band of people sing in a party

[H] There is no party.

[LABEL] **contradiction** [PRED] **contradiction** [COEFF] 13.2556

[P] A boy on a swing wearing a green shirt is making hand gestures.

[H] The boy has no hands

[LABEL] **contradiction** [PRED] **contradiction** [COEFF] 13.1117

[P] An older man with glasses raises his eyebrows in surprise.

[H] The man has no glasses.

[LABEL] **contradiction** [PRED] **contradiction** [COEFF] 12.9825

[P] People wearing glasses and shades are walking, while a man in a black shirt with the word " qualified " on it is facing them.

[H] There are no glasses

[LABEL] **contradiction** [PRED] **contradiction** [COEFF] 12.8345

[P] A girl is training in gymnastics with a georgia sign in the background.

[H] There is no sign in the background that says " georgia ".

[LABEL] **contradiction** [PRED] **contradiction** [COEFF] 12.7201

[P] A city street in front of a business with a construction worker and road cones.

[H] There are no cones in front of the city street.

[LABEL] **contradiction** [PRED] **contradiction** [COEFF] 12.6501

[P] A group of people are standing outside at a carnival, near a ride called the green jungle.

[H] The people are nowhere near the rides.

### 1.398 Component 397

[LABEL] **contradiction** [PRED] **contradiction** [COEFF] 15.5001

[P] A bride and groom on their wedding day with an array of guests standing behind them.

[H] A boy plays with his toy car in his room.

[LABEL] contradiction [PRED] contradiction [COEFF] 15.1732  
[P] Four people are standing in front of a foreign language billboard.  
[H] A monkey climbs a tree.

[LABEL] contradiction [PRED] contradiction [COEFF] 13.4796  
[P] Thai dancers happily going through their steps in unison.  
[H] A dog is sleeping.

[LABEL] contradiction [PRED] contradiction [COEFF] 12.7903  
[P] A person is laughing on a roller coaster ride.  
[H] A dog is sleeping.

[LABEL] contradiction [PRED] contradiction [COEFF] 12.1850  
[P] Someone is surfing along a wave with someone else swimming nearby.  
[H] A dog is eating an avocado.

[LABEL] contradiction [PRED] contradiction [COEFF] 12.0571  
[P] An elderly man in a suit pulling his luggage behind him.  
[H] Girl drinks some milk

[LABEL] contradiction [PRED] contradiction [COEFF] 11.8745  
[P] A captain checks the life vests of his passengers.  
[H] Two kids play in the living room with a ball.

[LABEL] contradiction [PRED] contradiction [COEFF] 11.7331  
[P] A young girl playing with a stuffed animal, while a redheaded child watches.  
[H] One man eats fries

[LABEL] contradiction [PRED] contradiction [COEFF] 11.6318  
[P] Two girls in red jerseys playing soccer  
[H] An old woman is sleeping.

[LABEL] contradiction [PRED] contradiction [COEFF] 11.5179  
[P] A chef and his two sous chefs prepare a dish in a restaurant.  
[H] A construction worker uses the porta potty.

[LABEL] contradiction [PRED] contradiction [COEFF] 11.0822  
[P] The dog jumps to catch the frisbee.  
[H] A boy fixes a computer

[LABEL] contradiction [PRED] contradiction [COEFF] 11.0063  
[P] A woman giving a presentation with a projection screen behind her.  
[H] Two children playing catch.

[LABEL] contradiction [PRED] contradiction [COEFF] 10.9432  
[P] Three dogs play in the grass near the playground equipment.

[H] A man fixes a dryer.

[LABEL] **contradiction** [PRED] **contradiction** [COEFF] 10.5619

[P] Many people in the open market on the street.

[H] Two kids play basketball in the driveway.

[LABEL] **contradiction** [PRED] **contradiction** [COEFF] 10.4324

[P] A new dad sees that his fatherhood is continuing.

[H] A woman flies a kite.

[LABEL] **contradiction** [PRED] **contradiction** [COEFF] 10.4001

[P] The musician is playing the guitar and singing.

[H] Three dogs sleep.

### 1.399 Component 398

[LABEL] **neutral** [PRED] **neutral** [COEFF] 26.6616

[P] A girl in pink twirls a ribbon.

[H] A girl is twirling a pink ribbon during her dance recital.

[LABEL] **neutral** [PRED] **neutral** [COEFF] 24.1508

[P] A woman with pink hair is dressed in thick winter clothes.

[H] A woman with pink hair is dressed in thick winter clothes, and also wears a hat.

[LABEL] **neutral** [PRED] **neutral** [COEFF] 23.0731

[P] Two people are reading while sitting outdoors.

[H] Two people are reading while sitting outdoors preparing for their exam later that day.

[LABEL] **neutral** [PRED] **neutral** [COEFF] 20.6402

[P] A large group of people are gathered.

[H] A group of people gather to discuss public policy

[LABEL] **neutral** [PRED] **neutral** [COEFF] 20.5638

[P] A gloved, redheaded woman with glasses is conducting an orchestra.

[H] A gloved, redheaded woman with glasses is conducting an orchestra in a large auditorium.

[LABEL] **neutral** [PRED] **neutral** [COEFF] 20.2881

[P] A black - haired girl is eating corn on the cob.

[H] The girl is eating corn on the cob at the state fair.

[LABEL] **neutral** [PRED] **neutral** [COEFF] 19.9689

[P] A boy skateboards on a cement wall.

[H] The boy skateboards on a cement wall near the park.

[LABEL] **neutral** [PRED] **neutral** [COEFF] 19.8661

[P] A man is running on a bridge, while a dog is standing between two men on the bridge as well.

[H] A man is running on a bridge, while a large brown dog is standing between two men on the bridge also.

[LABEL] **neutral** [PRED] **neutral** [COEFF] 19.3510

[P] Restaurant workers smile as they take a break, gathered around a huge copper bowl in the kitchen.

[H] The workers are eating a vegetable soup out of the huge, copper bowl

[LABEL] **neutral** [PRED] **neutral** [COEFF] 19.0453

[P] A woman in a purple skirt is dancing.

[H] A woman in a purple skirt is dancing to a rap song.

[LABEL] **neutral** [PRED] **neutral** [COEFF] 18.9940

[P] A girl playing her guitar in her bedroom.

[H] The girl is playing her favorite song on her guitar.

[LABEL] **neutral** [PRED] **neutral** [COEFF] 18.9383

[P] Two girls on horseback being led by guys.

[H] Two girls on horseback being led by guys on the local ranch trail.

[LABEL] **neutral** [PRED] **neutral** [COEFF] 18.8687

[P] A woman in a black uniform is pushing a bright yellow mop bucket down a hallway.

[H] The woman pushed the mop bucket down the hallway after cleaning the spill.

[LABEL] **neutral** [PRED] **neutral** [COEFF] 18.5756

[P] Two young women partake in a game of soccer.

[H] Two young women partake in a soccer game for a charity event

[LABEL] **neutral** [PRED] **neutral** [COEFF] 18.3387

[P] A large group of people watching a person climbing a pole.

[H] A person is climbing a pole to fix the flag while people watch.

[LABEL] **neutral** [PRED] **neutral** [COEFF] 18.3266

[P] A market offers a variety of fresh, colorful vegetables in the open air.

[H] The open air market is very popular

## 1.400 Component 399

[LABEL] **entailment** [PRED] **entailment** [COEFF] 62.9033

[P] A black dog running through water.

[H] The dog is black.

[LABEL] **entailment** [PRED] **entailment** [COEFF] 47.8586

[P] A black woman walking down a street.

[H] The woman is black.

[LABEL] **entailment** [PRED] **entailment** [COEFF] 46.1883

[P] A young white boy with short hair smiling into a microphone, standing near a slightly balding white

male smiling into a microphone.

[H] The boy is white

[LABEL] entailment [PRED] entailment [COEFF] 42.7049

[P] The black puppy is being touched by a foot.

[H] The puppy is black.

[LABEL] entailment [PRED] entailment [COEFF] 41.3810

[P] A young girl in a blue shirt is eating an ice cream cone.

[H] The girl is young

[LABEL] entailment [PRED] entailment [COEFF] 39.4407

[P] A small black dog growling at a large brown and white cow.

[H] The dog is black.

[LABEL] entailment [PRED] entailment [COEFF] 39.2865

[P] A small white dog is running across a grassy field.

[H] The dog is small.

[LABEL] entailment [PRED] entailment [COEFF] 39.1884

[P] A young boy in a yellow shirt is playing outside on monkey bars.

[H] The boy is young

[LABEL] entailment [PRED] entailment [COEFF] 38.3510

[P] 2 white ladies in casual clothing.

[H] The ladies are white.

[LABEL] entailment [PRED] entailment [COEFF] 37.5519

[P] A small boy dressed in a black sweatshirt with a logo on it, holds a red bat in front of blue stadium seats.

[H] The boy is small.

[LABEL] entailment [PRED] entailment [COEFF] 35.7658

[P] A small child with a funny red hat stands in the road.

[H] The child is small.

[LABEL] entailment [PRED] entailment [COEFF] 34.9224

[P] An african american woman sitting on a seat holding her purse talking on her cellphone.

[H] The woman is african american.

[LABEL] entailment [PRED] entailment [COEFF] 33.2964

[P] A young boy standing in front of a building holding a blue umbrella.

[H] The boy is young

[LABEL] entailment [PRED] entailment [COEFF] 30.9475

[P] A man in a brown jacket and scarf is in a small crowd with a train going by.

[H] A jacket is brown

[LABEL] entailment [PRED] entailment [COEFF] 30.1783  
[P] There are many tennis balls on a stand behind the blonde tennis player.  
[H] The tennis player is blonde.

[LABEL] entailment [PRED] entailment [COEFF] 29.8798  
[P] A person wearing an orange coat is walking during dark hour.  
[H] The coat is orange

### 1.401 Component 400

[LABEL] entailment [PRED] entailment [COEFF] 8.6435  
[P] A woman in a light green skirt is holding a black purse.  
[H] The lady holds a purse.

[LABEL] entailment [PRED] entailment [COEFF] 8.0561  
[P] The little, redheaded girl is holding a new baby.  
[H] A girl is holding a baby.

[LABEL] entailment [PRED] entailment [COEFF] 7.5093  
[P] The lady in the black coat is carrying a colorful bag.  
[H] The lady is carrying a bag.

[LABEL] entailment [PRED] entailment [COEFF] 7.3163  
[P] A arabian dressed lady leans backwards holding a skinny crooked sword.  
[H] A woman holds a sword

[LABEL] entailment [PRED] entailment [COEFF] 7.2943  
[P] A lady with dark hair is playing a harp.  
[H] The lady is playing a harp.

[LABEL] entailment [PRED] entailment [COEFF] 7.1150  
[P] A woman in a green dress holding a toy dinosaur.  
[H] A woman is holding a toy.

[LABEL] entailment [PRED] entailment [COEFF] 7.0410  
[P] A little boy in a green shirt is holding a large snake.  
[H] A boy is holding a snake.

[LABEL] entailment [PRED] entailment [COEFF] 7.0089  
[P] A woman with floppy brown hair in red playing an electric guitar.  
[H] A woman is playing a electric guitar.

[LABEL] entailment [PRED] entailment [COEFF] 6.9675  
[P] Girl in blue jacket holding a baby in overalls.  
[H] A girl is holding a baby

[LABEL] entailment [PRED] entailment [COEFF] 6.9612  
[P] An older man sitting against a wall with a guitar in his hands.  
[H] The older man is holding a guitar.

[LABEL] entailment [PRED] entailment [COEFF] 6.8966  
[P] A woman holds a child dressed in blue.  
[H] A woman is holding a child

[LABEL] entailment [PRED] entailment [COEFF] 6.8160  
[P] A red - haired woman carries a baby on her chest in a carrier.  
[H] A woman carries a baby on her chest.

[LABEL] entailment [PRED] entailment [COEFF] 6.6902  
[P] A woman wearing glasses is pointing at a painting on the wall.  
[H] A woman is pointing at a painting.

[LABEL] entailment [PRED] entailment [COEFF] 6.6748  
[P] A little girl is wearing a winter coat and holding a stuffed animal in one hand.  
[H] A little girl holding a stuffed animal.

[LABEL] entailment [PRED] entailment [COEFF] 6.6671  
[P] A woman wearing a hat carrying a little girl on her back.  
[H] A lady is with a little girl.

[LABEL] entailment [PRED] entailment [COEFF] 6.6418  
[P] A woman wearing a flowered top holding a drink and talking.  
[H] A woman is holding a drink.

## 1.402 Component 401

[LABEL] entailment [PRED] entailment [COEFF] 22.7308  
[P] The ground is covered in snow.  
[H] There is snow on the ground.

[LABEL] entailment [PRED] entailment [COEFF] 22.2156  
[P] A lot of people are marching through the street.  
[H] People are marching in the street.

[LABEL] entailment [PRED] entailment [COEFF] 19.1062  
[P] A woman inside a room sealed with caution tape.  
[H] Caution tape surrounds a room that contains a woman.

[LABEL] neutral [PRED] entailment [COEFF] 18.4805  
[P] The marching band practicing outside during the night.  
[H] A marching band practices outside.

[LABEL] entailment [PRED] entailment [COEFF] 17.8492  
[P] A group of people stand around talking with drinks in their hands.  
[H] People are holding drinks and talking.

[LABEL] entailment [PRED] entailment [COEFF] 17.6320  
[P] Artist adorns wall with a unique blue and white pattern.  
[H] Someone is decorating a wall.

[LABEL] entailment [PRED] entailment [COEFF] 17.5492  
[P] A kayaker kayaks through the water.  
[H] A kayaker is in the water.

[LABEL] entailment [PRED] entailment [COEFF] 17.4957  
[P] A crowd cheers on a baseball team.  
[H] People cheer on a baseball team.

[LABEL] entailment [PRED] entailment [COEFF] 16.9206  
[P] Two women are fighting in a martial arts tournament.  
[H] Two women are competing in martial arts.

[LABEL] entailment [PRED] entailment [COEFF] 16.7798  
[P] Five children dressed in black cloaks and hats.  
[H] There are kids wearing clothing.

[LABEL] entailment [PRED] entailment [COEFF] 16.1911  
[P] The man is playing a guitar.  
[H] The man has an instrument

[LABEL] entailment [PRED] entailment [COEFF] 12.9894  
[P] Inside a bar there are people with red shirts.  
[H] There are people wearing red in the bar.

[LABEL] entailment [PRED] entailment [COEFF] 12.7703  
[P] A man in a red uniform is standing in front of a train station sign.  
[H] A man is standing in front of a sign.

[LABEL] entailment [PRED] entailment [COEFF] 12.3569  
[P] People are getting ready to set sail on a boat  
[H] People are preparing to ride a boat.

[LABEL] neutral [PRED] entailment [COEFF] 11.9132  
[P] Six swimmers are competing a swimming race.  
[H] Six people are competing in a swimming race.

[LABEL] entailment [PRED] entailment [COEFF] 11.8631  
[P] Two bikers bike across the countryside.



[H] Two people are biking.

### 1.403 Component 402

[LABEL] **contradiction** [PRED] **contradiction** [COEFF] 9.0335

[P] The yellow dog is running next to a bush on a path in the grass.

[H] A dog is sleeping.

[LABEL] **contradiction** [PRED] **contradiction** [COEFF] 7.7819

[P] The boy is skateboarding on the bench by the fence.

[H] A boy is sleeping on the bench.

[LABEL] **contradiction** [PRED] **contradiction** [COEFF] 6.5583

[P] The dog leaps to catch the frisbee.

[H] A dog is sleeping on the ground.

[LABEL] **contradiction** [PRED] **contradiction** [COEFF] 6.4288

[P] A black dog lying on its back in green grass.

[H] A dog is standing up.

[LABEL] **contradiction** [PRED] **contradiction** [COEFF] 6.4210

[P] The small brown dog is leaping over the brick wall.

[H] There is a dog laying in grass.

[LABEL] **contradiction** [PRED] **contradiction** [COEFF] 6.2222

[P] A young man stands on a sidewalk between a newspaper dispenser and a trashcan, with a bus in the background.

[H] A man sleeps in his bed

[LABEL] **entailment** [PRED] **contradiction** [COEFF] 5.9786

[P] A singer and her band are performing on stage in a club.

[H] A singer is performing indoors.

[LABEL] **contradiction** [PRED] **contradiction** [COEFF] 5.7474

[P] Old man walking on the sidewalk.

[H] A man is sleeping.

[LABEL] **contradiction** [PRED] **contradiction** [COEFF] 5.4039

[P] A man putting a little boy wearing orange into a child swing.

[H] A mother puts a kid into a swing.

[LABEL] **contradiction** [PRED] **contradiction** [COEFF] 4.7686

[P] Grownups and small children are walking down a road lined with trees.

[H] A person is at the beach.

[LABEL] **contradiction** [PRED] **contradiction** [COEFF] 4.7248

[P] A young girl is holding a chicken.

[H] A girl is inside sleeping.

[LABEL] **contradiction** [PRED] **contradiction** [COEFF] 4.6869

[P] A woman sitting at a counter is looking up.

[H] A person is lying down in the kitchen.

[LABEL] **contradiction** [PRED] **contradiction** [COEFF] 4.6703

[P] A young female student studying in a classroom reading a book with her leg rested on another desk.

[H] A boy is studying in the library.

[LABEL] **contradiction** [PRED] **contradiction** [COEFF] 4.6262

[P] Black dog running in swampy grass

[H] A dog is sleeping on a couch.

[LABEL] **contradiction** [PRED] **contradiction** [COEFF] 4.5894

[P] A group of saddled camels and their riders.

[H] A man rides an elephant.

[LABEL] **contradiction** [PRED] **contradiction** [COEFF] 4.5311

[P] A man in a green outfit shows off his red motorcycle for a crowd

[H] A man is sleeping.

## 1.404 Component 403

[LABEL] **neutral** [PRED] **neutral** [COEFF] 40.3358

[P] Five adults are playing cards while sitting outside at a picnic table in their backyard.

[H] There are snacks available for the players.

[LABEL] **entailment** [PRED] **entailment** [COEFF] 35.4055

[P] Four men are on stage performing music.

[H] The men are making noise.

[LABEL] **neutral** [PRED] **neutral** [COEFF] 32.4681

[P] The four beautiful ballerinas are on stage.

[H] The women are dancing on pointe.

[LABEL] **neutral** [PRED] **neutral** [COEFF] 30.3409

[P] A family sits in the grass in a park in india.

[H] These people are having a picnic.

[LABEL] **neutral** [PRED] **neutral** [COEFF] 30.2522

[P] Four children splash and play in a flooded playground.

[H] Four children splash happily

[LABEL] **neutral** [PRED] **neutral** [COEFF] 29.7208

[P] A snowboarder grinding up a homemade ramp.

[H] A snowboarder is trying a new trick.

[LABEL] **neutral** [PRED] **neutral** [COEFF] 28.8590

[P] A woman is running a marathon in a park.

[H] The woman is running fast.

[LABEL] **neutral** [PRED] **neutral** [COEFF] 28.0631

[P] Business women walk outside.

[H] The women are wearing suits.

[LABEL] **neutral** [PRED] **neutral** [COEFF] 27.3297

[P] Three people play violins and a guitar and sing into microphones.

[H] The people are in a band.

[LABEL] **neutral** [PRED] **neutral** [COEFF] 26.9106

[P] A young child with a jesters hat sliding down a snow covered hill.

[H] It snowed today.

[LABEL] **neutral** [PRED] **neutral** [COEFF] 25.9725

[P] Three traffic lights hang over wilson street.

[H] The traffic lights are easily visible over wilson street.

[LABEL] **neutral** [PRED] **neutral** [COEFF] 25.3393

[P] A group of boys playing soccer in a muddy wet field.

[H] The boys are having fun.

[LABEL] **entailment** [PRED] **neutral** [COEFF] 25.1520

[P] A man, feet fastened to a board and holding a tow - rope becomes airborne over the water.

[H] The man is surfing in the water.

[LABEL] **neutral** [PRED] **neutral** [COEFF] 24.9887

[P] People who are all deck out in canadian colors are eating food at a canadian festival.

[H] People wander about the grounds of a fair iin canada

[LABEL] **entailment** [PRED] **neutral** [COEFF] 24.8539

[P] Two motorcyclists racing neck and neck around a corner.

[H] The motorcyclists are moving fast.

[LABEL] **entailment** [PRED] **neutral** [COEFF] 23.9763

[P] A four man construction crew is assembling scaffolding.

[H] The work crew was hard at work.

## 1.405 Component 404

[LABEL] **neutral** [PRED] **contradiction** [COEFF] 35.6584

[P] Two children relaxing by the pool.  
[H] Two girls sitting by the pool.

[LABEL] **contradiction** [PRED] **contradiction** [COEFF] 30.3048  
[P] Two children run towards the lagoon.  
[H] Two girls play dress up

[LABEL] **neutral** [PRED] **contradiction** [COEFF] 20.6545  
[P] Army person squatting in the rain.  
[H] There is a woman outside in the rain.

[LABEL] **neutral** [PRED] **contradiction** [COEFF] 19.2028  
[P] Young adults wearing uniforms wheel a contraption.  
[H] Two young women are pushing a contraption on wheels.

[LABEL] **contradiction** [PRED] **contradiction** [COEFF] 19.1038  
[P] A rock climber hangs from a ledge while others look on.  
[H] A girl hangs from a ledge and falls while others laugh.

[LABEL] **neutral** [PRED] **contradiction** [COEFF] 18.8280  
[P] Two children kneeling down with pirate hats on  
[H] Two sisters play dress up

[LABEL] **neutral** [PRED] **neutral** [COEFF] 18.1235  
[P] Three children are playing cricket in a field.  
[H] Three little girls play cricket together in the field.

[LABEL] **neutral** [PRED] **contradiction** [COEFF] 17.4119  
[P] Two children wearing cardboard costumes are standing amongst a large crowd of people.  
[H] Two little girls stand around on halloween.

[LABEL] **entailment** [PRED] **contradiction** [COEFF] 17.3423  
[P] A frowning elderly person is walking and carrying a plastic bag  
[H] A woman is walking.

[LABEL] **neutral** [PRED] **contradiction** [COEFF] 17.3144  
[P] A person wearing a red jacket and helmet walks up near the large rock.  
[H] A girl gets ready to go rock climbing.

[LABEL] **neutral** [PRED] **contradiction** [COEFF] 16.7378  
[P] A surfer is riding a wave.  
[H] A woman is riding the waves to the shore.

[LABEL] **entailment** [PRED] **contradiction** [COEFF] 16.3861  
[P] A group of older individuals sit on chairs while one individual in blue stands.  
[H] The elderly women wait in their seats.

[LABEL] neutral [PRED] contradiction [COEFF] 15.6617

[P] A boy is combing a baby's hair with a brush.

[H] A boy styles his sister's hair

[LABEL] contradiction [PRED] contradiction [COEFF] 15.4001

[P] The child wearing a cap is holding a fishing pole.

[H] A girl is holding a fishing net.

[LABEL] contradiction [PRED] contradiction [COEFF] 15.3455

[P] A hard - working child is mopping the floor.

[H] A woman is mopping

[LABEL] contradiction [PRED] contradiction [COEFF] 14.9851

[P] A child at the edge of the water coming in on a beach.

[H] A mom is running from a monster.

## 1.406 Component 405

[LABEL] contradiction [PRED] contradiction [COEFF] 5.6730

[P] A man holds a beer in one hand as he tosses a frisbee in a park.

[H] A man with a can of coke tosses a frisbee in a gym.

[LABEL] contradiction [PRED] contradiction [COEFF] 5.1869

[P] Multiple people are sitting in outside of a hut.

[H] A group of people are sitting in a church.

[LABEL] contradiction [PRED] contradiction [COEFF] 4.8349

[P] A man and young girl eat a meal on a city street.

[H] A man and a young girl are eating a meal on the moon.

[LABEL] contradiction [PRED] contradiction [COEFF] 4.7443

[P] A crowded community marketplace where many people are buying and selling products.

[H] Many people are in a church during a funeral service.

[LABEL] contradiction [PRED] contradiction [COEFF] 4.4985

[P] Man leaning back in his chair sleeping in an office.

[H] A man is working in the garden.

[LABEL] contradiction [PRED] contradiction [COEFF] 4.4953

[P] A man in jeans standing on the sidewalk, holding a motorcycle helmet, looking towards the road.

[H] A man is looking at the stage where the musicians are playing.

[LABEL] contradiction [PRED] contradiction [COEFF] 4.3429

[P] A worker walking down the street.

[H] A person walking through a field

[LABEL] **contradiction** [PRED] **contradiction** [COEFF] 4.3222

[P] A brown dog walks on the rocks near a river.

[H] Brown dog is in the streets.

[LABEL] **contradiction** [PRED] **contradiction** [COEFF] 4.1654

[P] A dog trotting down the beach with a toy in its mouth.

[H] The dog is walking down the city street.

[LABEL] **contradiction** [PRED] **contradiction** [COEFF] 4.1216

[P] Girl dancing on the beach.

[H] The girl is dancing in the house

[LABEL] **contradiction** [PRED] **contradiction** [COEFF] 4.0196

[P] A large group of people fill a street.

[H] A large group of people are in a pool.

[LABEL] **contradiction** [PRED] **contradiction** [COEFF] 4.0108

[P] Several people, including a man in a black t - shirt and jeans, dance inside a theater.

[H] People drinking coffee at a cafe

[LABEL] **contradiction** [PRED] **contradiction** [COEFF] 3.9605

[P] A girl in pink and a boy in blue walk through a forest trail.

[H] Two kids on a city street

[LABEL] **contradiction** [PRED] **contradiction** [COEFF] 3.9212

[P] A brown dog carries a multiple colored toy in the grass.

[H] A dog is playing on concrete

[LABEL] **contradiction** [PRED] **contradiction** [COEFF] 3.8940

[P] A woman with a pink bag and white umbrella waits at a train platform.

[H] A woman waits at the bus station.

[LABEL] **entailment** [PRED] **contradiction** [COEFF] 3.8706

[P] A person with a backpack is walking on a cobblestone path.

[H] A person is walking down the street.

## 1.407 Component 406

[LABEL] **contradiction** [PRED] **contradiction** [COEFF] 5.0343

[P] A group of men and women are rehearsing together on a stage.

[H] A group sleeps quietly at a park

[LABEL] **contradiction** [PRED] **contradiction** [COEFF] 4.9704

[P] An older couple is standing in a kitchen together.

[H] An older couple is sitting in a park near a lake.

[LABEL] contradiction [PRED] contradiction [COEFF] 4.6842

[P] A group of men is eating pizza in a restaurant.

[H] Men are walking in a park.

[LABEL] contradiction [PRED] contradiction [COEFF] 4.5831

[P] A woman in a green shirt standing at a podium.

[H] The man sat on the bench.

[LABEL] contradiction [PRED] contradiction [COEFF] 4.4670

[P] A man in a brown shirt is standing on a bridge and pointing while other people walk by.

[H] A man is laying on the ground.

[LABEL] contradiction [PRED] contradiction [COEFF] 4.4593

[P] Young girl ballerinas in white tutus on a stage.

[H] Young girls are sitting on the floor.

[LABEL] contradiction [PRED] contradiction [COEFF] 4.4049

[P] A band plays at a venue along the water.

[H] The band sits idly in a hospital.

[LABEL] contradiction [PRED] contradiction [COEFF] 4.3604

[P] Four people dancing on a stage wearing a red scarf around their waists.

[H] The four people are sitting on a couch.

[LABEL] contradiction [PRED] contradiction [COEFF] 4.3006

[P] A pilot wearing his professional uniform stands next to his luggage with a newspaper in an airport terminal.

[H] A pilot is laying in a hammock

[LABEL] contradiction [PRED] contradiction [COEFF] 4.2920

[P] A white man with black clothing stands near the edge of a sidewalk with a bunch of people standing or walking around behind him.

[H] A man lies alone in a field.

[LABEL] contradiction [PRED] contradiction [COEFF] 4.2499

[P] A man is skateboarding in front of a group of people.

[H] A man sits along in a forest.

[LABEL] contradiction [PRED] contradiction [COEFF] 4.1788

[P] A man in a hard hat wearing an orange safety vest, standing next to a building.

[H] A man lays in a tent in the woods sleeping.

[LABEL] contradiction [PRED] contradiction [COEFF] 4.1018

[P] A bald man in a band is playing guitar in the spotlight.

[H] The man in the band is sitting in a bathtub.

[LABEL] contradiction [PRED] contradiction [COEFF] 4.0508

[P] A group of people, the majority of whom are male, are standing at the foot of a flight of stairs looking up.

[H] The male is alone in the middle of the lake.

[LABEL] contradiction [PRED] contradiction [COEFF] 4.0401

[P] A woman on stage lit from behind standing in front of a microphone wearing a gray top and black pants with a red, white, and blue flag wrapped part way around the lower half of her body

[H] A woman is laying on her couch

[LABEL] contradiction [PRED] contradiction [COEFF] 3.9346

[P] A brown dog takes cautious steps in the calm waters with a sandy bottom.

[H] A dog jumps recklessly into a raging river.

## 1.408 Component 407

[LABEL] contradiction [PRED] contradiction [COEFF] 14.2145

[P] A man with a hat and a woman with a black top are walking on a grass field.

[H] Dog looks at fish

[LABEL] contradiction [PRED] contradiction [COEFF] 13.6190

[P] A redheaded woman with a scarf in her hair, wearing a white sweater with black bows on it.

[H] The dog is chasing the cat.

[LABEL] contradiction [PRED] contradiction [COEFF] 12.5823

[P] A street corner with parked cars - white, red and black.

[H] Dog eats a sandwich

[LABEL] contradiction [PRED] contradiction [COEFF] 12.5644

[P] A " the human shop " display in a public area such as a mall or airport, with four people, 3 females and one male, all wearing black with chains around their wrists, two of the females are sitting and the other with the male are standing, with a green sign in white lettering explaining what it is on the top and bottom for more information.

[H] A tiny baby cries.

[LABEL] contradiction [PRED] contradiction [COEFF] 11.6841

[P] A ruddy infant lies on a patterned sheet with his eyes closed, his mouth open, and his arm extended.

[H] Dog chases cat

[LABEL] contradiction [PRED] contradiction [COEFF] 11.1556

[P] Two women talk while working with dough in a commercial kitchen.

[H] A tiger runs through the jungle.

[LABEL] contradiction [PRED] contradiction [COEFF] 11.1235

[P] A woman has tables set up of things she is selling, while a lady and child look.

[H] Monkey sleeps



[LABEL] **contradiction** [PRED] **contradiction** [COEFF] 11.0226  
[P] A man in a green shirt laughs next to a woman in a yellow sweater, holding a pink balloon and wearing a pink tiara.  
[H] Birds are eating seeds

[LABEL] **contradiction** [PRED] **contradiction** [COEFF] 10.8186  
[P] A blond woman, wearing a white shirt, walks past a sign advertising food and drinks.  
[H] Palominos pantomime.

[LABEL] **contradiction** [PRED] **contradiction** [COEFF] 10.7640  
[P] A woman is dressed in a " fire department " uniform.  
[H] Cat looks at pool

[LABEL] **contradiction** [PRED] **contradiction** [COEFF] 10.6055  
[P] A baby with blond - hair in brown pants and white shirt lays his head over the side of the jumper.  
[H] Man eats pickles

[LABEL] **contradiction** [PRED] **contradiction** [COEFF] 10.2801  
[P] A man wearing a blue shirt and tan pants crossing the street.  
[H] Hyenas gargle listerine.

[LABEL] **contradiction** [PRED] **contradiction** [COEFF] 9.7272  
[P] A man, with a red sports jersey, looks on at a football match.  
[H] Dog eats food

[LABEL] **entailment** [PRED] **contradiction** [COEFF] 9.6379  
[P] A woman in a hat sits reading and drinking a coffee.  
[H] Martial arts demonstration

[LABEL] **contradiction** [PRED] **contradiction** [COEFF] 9.2872  
[P] Four men waiting in a area, holding ladders.  
[H] A dog bites a cat

[LABEL] **neutral** [PRED] **contradiction** [COEFF] 9.1643  
[P] A large group of people sitting in a room and watching something.  
[H] The grass was green

## 1.409 Component 408

[LABEL] **contradiction** [PRED] **contradiction** [COEFF] 12.6383  
[P] Lighthouse in a wooded area sits above tree's.  
[H] The lighthouse was in the middle of a barren desert.

[LABEL] **contradiction** [PRED] **contradiction** [COEFF] 10.6927  
[P] People are walking down a narrow shop - filled asian alley.  
[H] The people are sitting in a wide lobby

[LABEL] contradiction [PRED] contradiction [COEFF] 10.4216  
[P] People using an outdoor ice skating rink.  
[H] The people are on a plane.

[LABEL] contradiction [PRED] contradiction [COEFF] 9.5654  
[P] Two old men wearing winter coat walking through woods.  
[H] The men are walking through the desert.

[LABEL] contradiction [PRED] contradiction [COEFF] 9.3711  
[P] A little boy is running across a crosswalk.  
[H] The boy is standing still.

[LABEL] contradiction [PRED] contradiction [COEFF] 9.3453  
[P] A large building with all people walking by.  
[H] Everything is so small.

[LABEL] contradiction [PRED] contradiction [COEFF] 9.2513  
[P] A man wearing black shorts is standing in front of a snow covered mountain.  
[H] The man is in the middle of the ocean.

[LABEL] contradiction [PRED] contradiction [COEFF] 9.0393  
[P] A fisherman sits in his boat repairing his net.  
[H] The fisherman is sitting in his car.

[LABEL] contradiction [PRED] contradiction [COEFF] 8.9958  
[P] Two pomeranian dogs playing in the snow.  
[H] The dogs are playing on beach sand.

[LABEL] contradiction [PRED] contradiction [COEFF] 8.9757  
[P] A man wearing a black shirt is holding a blond - hair baby.  
[H] The man is in a orange shirt.

[LABEL] contradiction [PRED] contradiction [COEFF] 8.9574  
[P] A man stands in front of a pond with a green hill behind it.  
[H] The man is standing on the beach near the ocean.

[LABEL] contradiction [PRED] contradiction [COEFF] 8.9278  
[P] A group of people walking by a fence.  
[H] The group of people are laying on the beach.

[LABEL] contradiction [PRED] contradiction [COEFF] 8.9197  
[P] A busy street has several people all around and bicycles lined up in a row.  
[H] The street is empty.

[LABEL] contradiction [PRED] contradiction [COEFF] 8.9109  
[P] A girl wearing a blue backpack is walking beside a blue plastic fence.

[H] The girl is sitting by a black fence with a red backpack

[LABEL] **contradiction** [PRED] **contradiction** [COEFF] 8.8705

[P] A blue - eyed woman with red - hair and glasses looks up at the camera while holding a hamburger with a bite out of it, as she sits on a boat with four other young people who are drinking and eating.

[H] The woman is standing on a mountain top.

[LABEL] **contradiction** [PRED] **contradiction** [COEFF] 8.7560

[P] People on a sidewalk during a snowstorm.

[H] The people are sitting on the sandy beach.

## 1.410 Component 409

[LABEL] **contradiction** [PRED] **neutral** [COEFF] 16.8695

[P] A man in a usa team shirt is about to dunk a basketball.

[H] The man is at the bench.

[LABEL] **entailment** [PRED] **neutral** [COEFF] 16.4658

[P] A group of mountain climbers

[H] A group of climbers are outside

[LABEL] **neutral** [PRED] **neutral** [COEFF] 14.5539

[P] A boy bounces on a trampoline.

[H] A 13 year old male is jumping.

[LABEL] **neutral** [PRED] **contradiction** [COEFF] 14.3418

[P] A young man performs tricks on a snowboard.

[H] The man is landing a jump.

[LABEL] **neutral** [PRED] **neutral** [COEFF] 13.5692

[P] People dressed in blue marching in a parade on a public street.

[H] People are in a gay pride parade.

[LABEL] **entailment** [PRED] **entailment** [COEFF] 13.5272

[P] Young boys line up at the line of scrimmage during a football game on a gray day.

[H] Boys are outside playing football.

[LABEL] **neutral** [PRED] **neutral** [COEFF] 13.5263

[P] Two conoes float down the river.

[H] Two people are fishing in canoes.

[LABEL] **contradiction** [PRED] **contradiction** [COEFF] 12.4474

[P] A person pole - vaulting at the beach in a jacket and khakis.

[H] A woman smacks a volleyball on the beach.

[LABEL] **neutral** [PRED] **contradiction** [COEFF] 12.3986

[P] Young girl with pigtails painting outside in the grass.

[H] The girl is painting a rainbow.

[LABEL] **contradiction** [PRED] **contradiction** [COEFF] 12.0582

[P] A girl presenting flowers to a man who is unconvinced.

[H] The store was closed.

[LABEL] **neutral** [PRED] **neutral** [COEFF] 12.0582

[P] A woman playing volleyball in the middle of hitting the volleyball.

[H] The lady is spiking the volleyball over the net

[LABEL] **neutral** [PRED] **contradiction** [COEFF] 11.5708

[P] Soccer plays in blue uniforms cheer together.

[H] The uniforms have hoodies.

[LABEL] **neutral** [PRED] **neutral** [COEFF] 11.4406

[P] A group of men of various ages wearing glasses while holding instruments and looking at sheet music.

[H] The group of men practice their instruments in class.

[LABEL] **contradiction** [PRED] **contradiction** [COEFF] 11.4172

[P] Three people standing in line.

[H] A lady is playing basketball.

[LABEL] **neutral** [PRED] **neutral** [COEFF] 11.1401

[P] A girl with headphones on sitting and writing in a notebook.

[H] Girl transcribing music lyrics

[LABEL] **contradiction** [PRED] **contradiction** [COEFF] 11.0617

[P] Three men are performing construction work on a fence.

[H] The three men are running from a bee.

## 1.411 Component 410

[LABEL] **contradiction** [PRED] **contradiction** [COEFF] 22.5501

[P] Two boys in denim play with hula hoops

[H] Two girls in denim play.

[LABEL] **contradiction** [PRED] **contradiction** [COEFF] 17.7446

[P] Five boys which two of them have a skateboard hanging out in front of statue.

[H] Girls are ice skating near a statue.

[LABEL] **contradiction** [PRED] **contradiction** [COEFF] 17.1362

[P] Three boys all wearing green shirts are climbing on a slide.

[H] Five girls are climbing up a sliding board.

[LABEL] **contradiction** [PRED] **contradiction** [COEFF] 15.7244

[P] Four young boys are running down a sidewalk.

[H] Four girls walk with confidence

[LABEL] contradiction [PRED] contradiction [COEFF] 14.8336

[P] The boy in swim trunks is laying face down on a watery pavement.

[H] Girl laying on dry pavements

[LABEL] contradiction [PRED] contradiction [COEFF] 14.7745

[P] The little boy in red is getting drenched with water.

[H] The little girl got hit with a water baloon.

[LABEL] contradiction [PRED] contradiction [COEFF] 12.7900

[P] Two little girls in red and black costumes are posing for a picture.

[H] The boys are in costume.

[LABEL] contradiction [PRED] contradiction [COEFF] 12.1719

[P] A young boy in a black jacket is running towards a woman with outstretched arms.

[H] A young girl in a black jacket is running towards a woman with outstretched arms.

[LABEL] contradiction [PRED] contradiction [COEFF] 11.6616

[P] A young kid is standing up on the merry - go - round.

[H] A girl on a roller coaster.

[LABEL] contradiction [PRED] contradiction [COEFF] 11.5836

[P] Two boys, one with a purple thing in his hair.

[H] Two girls hanging out.

[LABEL] contradiction [PRED] contradiction [COEFF] 10.8201

[P] An older young boy and a middle - aged boy looking and laughing at a computer screen.

[H] Two girls laughing.

[LABEL] contradiction [PRED] contradiction [COEFF] 10.7948

[P] A five - piece male band is practicing at someone's home.

[H] 5 woman play accordians.

[LABEL] contradiction [PRED] contradiction [COEFF] 10.5705

[P] A little boy skateboarder is doing a trick on his board while another young skateboarder watches.

[H] A girl is sitting on a skateboard watching tv.

[LABEL] contradiction [PRED] contradiction [COEFF] 10.3828

[P] A boy in jeans and a gray t - shirt is gazing at the hand he has raised toward his breast bone.

[H] A girl in jeans and a gray t - shirt is gazing at the hand he has raised toward his breast bone.

[LABEL] contradiction [PRED] contradiction [COEFF] 10.0509

[P] Two young girls are talking to each other.

[H] Two boys talk about a girl.

[LABEL] contradiction [PRED] contradiction [COEFF] 9.6799

[P] Several male players from two rollerskating teams are playing a game in a rink, while the referee stands right near them.

[H] Several female players skating.

## 1.412 Component 411

[LABEL] contradiction [PRED] contradiction [COEFF] 32.8778

[P] A young girl is smiling in front of the camera at a park.

[H] The girl is frowning.

[LABEL] contradiction [PRED] contradiction [COEFF] 20.3161

[P] A man and a woman smile as they sit in yellow lawn chairs.

[H] A man and woman are frowning as they try to figure out how to pay the rent.

[LABEL] contradiction [PRED] contradiction [COEFF] 15.9636

[P] Boy in tan hat laughs while sitting near playground equipment.

[H] The boy is frowning.

[LABEL] contradiction [PRED] contradiction [COEFF] 15.7085

[P] A man in a white button up shirt smiling and laughing at the camera.

[H] Every single person who is shown is frowning.

[LABEL] contradiction [PRED] contradiction [COEFF] 15.3333

[P] An elderly woman sits in a chair with a book and smiles at the pretty flowers in her room.

[H] An old lady frowns.

[LABEL] contradiction [PRED] contradiction [COEFF] 14.6193

[P] A smiling woman rides the subway while reading a magazine, with a 'bud light' advertisement behind her.

[H] The woman looks angry.

[LABEL] contradiction [PRED] contradiction [COEFF] 14.4139

[P] The gal wearing the black sunglasses and blue jean jacket is smiling.

[H] The girl looks angry.

[LABEL] contradiction [PRED] contradiction [COEFF] 14.2401

[P] A man in sunglasses smiles.

[H] A woman in sunglasses is frowning

[LABEL] contradiction [PRED] contradiction [COEFF] 12.4607

[P] Two woman in dresses smile at a camera while walking.

[H] The two women are frowning at the camera.

[LABEL] contradiction [PRED] contradiction [COEFF] 11.4757

[P] Two women wearing graduation hats and robes are smiling.

[H] Two women are wearing jeans and are frowning.

[LABEL] **contradiction** [PRED] **contradiction** [COEFF] 9.9464

[P] The girl in the blue dress and hat is smiling.

[H] A girl is dressed in rags and is unhappy.

[LABEL] **contradiction** [PRED] **contradiction** [COEFF] 8.9818

[P] Two girls in blue and red laughing.

[H] Two girls are frowning.

[LABEL] **contradiction** [PRED] **contradiction** [COEFF] 8.8046

[P] Many women sitting happily together smiling at the camera.

[H] The women are sad

[LABEL] **contradiction** [PRED] **contradiction** [COEFF] 8.7435

[P] An older woman in hiking clothing and a summer hat smiles.

[H] A woman in ski gear frowns.

[LABEL] **contradiction** [PRED] **contradiction** [COEFF] 7.8334

[P] Two woman in dresses smiling at the camera.

[H] The woman are glaring.

[LABEL] **contradiction** [PRED] **contradiction** [COEFF] 7.4006

[P] A very happy looking man jumps up for a photo while people walk around him.

[H] The man looked sour.

### 1.413 Component 412

[LABEL] **entailment** [PRED] **entailment** [COEFF] 12.8165

[P] A black dog jumping off of a dock.

[H] A black dog is jumping off the dock

[LABEL] **entailment** [PRED] **entailment** [COEFF] 12.2880

[P] Child in a yellow shirt jumping over traffic cones.

[H] The kid in the yellow shirt jumps over traffic cones.

[LABEL] **entailment** [PRED] **entailment** [COEFF] 12.2550

[P] A man jumping off of rocks into a pool of water.

[H] A man jumps into a pool.

[LABEL] **entailment** [PRED] **entailment** [COEFF] 11.5652

[P] A skier is falling face first into the snow.

[H] The skier fell into the snow.

[LABEL] **neutral** [PRED] **entailment** [COEFF] 10.5138

[P] A black dog jumps off a pier into a lake.

[H] A black dog jumps off the edge into the lake.

[LABEL] entailment [PRED] entailment [COEFF] 9.9941

[P] A dog runs over a stick in the leaves.

[H] A dog runs past a stick.

[LABEL] entailment [PRED] entailment [COEFF] 9.4849

[P] A boy grabs his leg as he jumps in the air.

[H] A boy is jumping in the air.

[LABEL] entailment [PRED] entailment [COEFF] 9.3370

[P] The man is jumping over blocks on a track.

[H] A man jumps blocks on the track.

[LABEL] entailment [PRED] entailment [COEFF] 8.8760

[P] Brown dog runs down ramp.

[H] The dog ran down the ramp.

[LABEL] entailment [PRED] entailment [COEFF] 8.8190

[P] The dog is running after the bull.

[H] The dog ran after the bull.

[LABEL] entailment [PRED] entailment [COEFF] 8.7628

[P] A gold dog jumping off a wooden porch.

[H] A dog jumps off the porch.

[LABEL] entailment [PRED] entailment [COEFF] 8.4866

[P] A boy is helping a little girl put on her goggles

[H] A boy helps the little girl put her goggles on.

[LABEL] entailment [PRED] entailment [COEFF] 8.4238

[P] A young boy in a gray beanie is flipping a skateboard off of a curb in an area with graffited walls.

[H] A young boy in a gray beanie is flipping a skateboard off of a curb.

[LABEL] entailment [PRED] entailment [COEFF] 8.3057

[P] A snowboarder jumping off a tall brick building.

[H] A snowboarder making a jump from a tall building.

[LABEL] entailment [PRED] entailment [COEFF] 8.2935

[P] A motorcyclist landing on a hill with his dirt bike.

[H] A motorcyclist lands his dirt bike.

[LABEL] entailment [PRED] entailment [COEFF] 8.2901

[P] This boy is cycling to market to get vegetables.

[H] The boy cycled to the market.



## 1.414 Component 413

[LABEL] **contradiction** [PRED] **contradiction** [COEFF] 43.9760

[P] A closeup photo of a football player for the sooners team who is wearing a red jersey with the number 19.

[H] The player is wearing a black jersey.

[LABEL] **contradiction** [PRED] **contradiction** [COEFF] 42.0223

[P] An old woman dressed in a red coat holds a red bag and a pink umbrella.

[H] The woman has a black coat.

[LABEL] **contradiction** [PRED] **contradiction** [COEFF] 30.6182

[P] A blond woman in a fur coat and red hat stands in a doorway.

[H] The woman has black hair.

[LABEL] **contradiction** [PRED] **contradiction** [COEFF] 28.3393

[P] A dark - haired woman is wearing a red outfit.

[H] A woman is wearing a black outfit.

[LABEL] **contradiction** [PRED] **contradiction** [COEFF] 19.7716

[P] The horse on the right is red.

[H] The horse on the right is black.

[LABEL] **neutral** [PRED] **contradiction** [COEFF] 18.7625

[P] A woman in a field, wearing a short white dress and red shoes, is kicking up one of her heels.

[H] A lady kicks u he heel of her black shoe.

[LABEL] **contradiction** [PRED] **contradiction** [COEFF] 18.7584

[P] A person wearing a purple shirt and a blue headband is fixing their hair in a mirror.

[H] The person has on a solid black shirt.

[LABEL] **contradiction** [PRED] **contradiction** [COEFF] 17.9682

[P] A young child with blond - hair and yellow boots plays with a shovel, rocks and a dump truck.

[H] The child has raven - black hair.

[LABEL] **contradiction** [PRED] **contradiction** [COEFF] 17.4833

[P] A young girl is wearing a purple shirt and pink headband.

[H] She wore all black.

[LABEL] **neutral** [PRED] **contradiction** [COEFF] 16.3816

[P] A woman in a purple dress rubs her head as other people look on.

[H] The woman is wearing black heels.

[LABEL] **contradiction** [PRED] **contradiction** [COEFF] 16.0518

[P] There is a man with a black shirt and a black hat smiling.

[H] There is a man with a red shirt and a red hat smiling.

[LABEL] **contradiction** [PRED] **contradiction** [COEFF] 15.9790

[P] Old lady with black dress and hat points out something to bride.

[H] A young woman in a red dress shakes the bride's hand.

[LABEL] **contradiction** [PRED] **contradiction** [COEFF] 15.4878

[P] A man putting on a red sweatshirt with a cityscape behind him.

[H] The man's sweatshirt is grey.

[LABEL] **contradiction** [PRED] **contradiction** [COEFF] 15.4210

[P] A woman with a red and orange apron makes paper - mache orbs while her friend leans into the frame.

[H] A woman is wearing a black and white apron

[LABEL] **contradiction** [PRED] **contradiction** [COEFF] 15.3505

[P] A woman wearing a white top is riding on a red vehicle being pulled by two beige horses.

[H] A woman in a car driving behind a black horse.

[LABEL] **contradiction** [PRED] **contradiction** [COEFF] 15.1976

[P] There are two men here at the center of the picture wearing red tie dye shirts and metal helmets topped with lit burners.

[H] The men are wearing completely black suits.

## 1.415 Component 414

[LABEL] **entailment** [PRED] **entailment** [COEFF] 33.6971

[P] A little blond girl sitting down looking at a stack of books.

[H] A young girl is looking at books.

[LABEL] **entailment** [PRED] **entailment** [COEFF] 33.2148

[P] A little girl is playing with colorful dolls.

[H] A young girl plays with her dolls.

[LABEL] **entailment** [PRED] **entailment** [COEFF] 28.6721

[P] A little boy standing beside a train.

[H] A young boy is near a train.

[LABEL] **entailment** [PRED] **entailment** [COEFF] 26.1257

[P] A little girl is playing outside in the fall.

[H] A small child is playing outside.

[LABEL] **entailment** [PRED] **entailment** [COEFF] 21.3378

[P] A little shirtless boy in shorts splashes water.

[H] A young boy splashes water

[LABEL] **entailment** [PRED] **entailment** [COEFF] 21.3060

[P] A little girl in a pink shirt holding a baby

[H] A young female with a baby.

[LABEL] entailment [PRED] entailment [COEFF] 20.4754

[P] A young girl fully dresses running on the beach towards the water.

[H] A little girl is running on the sand.

[LABEL] entailment [PRED] entailment [COEFF] 19.4209

[P] A toddler has her eyes shut, looking as if she is thinking about something.

[H] A young child has their eyes closed.

[LABEL] entailment [PRED] entailment [COEFF] 19.2351

[P] A young boy runs towards a wall that's been littered with graffiti.

[H] A little boy runs towards a wall covered in graffiti.

[LABEL] entailment [PRED] entailment [COEFF] 18.2787

[P] A young girl wearing a pink bathing suit with yellow and purple flowers is riding a toy train outside.

[H] A little girl is playing outside.

[LABEL] entailment [PRED] entailment [COEFF] 18.0500

[P] A small blond girl with a red balloon is standing in the opening of a wooden building.

[H] A child is holding a red balloon.

[LABEL] entailment [PRED] entailment [COEFF] 17.6807

[P] A little girl in the daycare making faces.

[H] A child making a face.

[LABEL] entailment [PRED] entailment [COEFF] 17.0927

[P] A little girl dressed in dark colors stands on a rock overlooking a large pond at the park.

[H] A child is standing outside.

[LABEL] entailment [PRED] entailment [COEFF] 16.7942

[P] A lady holding a little girl's hand in a subway.

[H] An woman clutches a young girl's hand in an underground train.

[LABEL] neutral [PRED] entailment [COEFF] 16.5651

[P] A little girl in a white sweater and hat smiles beside an outdoor fireplace.

[H] There is a child beside a fire.

[LABEL] entailment [PRED] entailment [COEFF] 16.2110

[P] A young girl wearing blue smiles.

[H] A little girl wears blue.

## 1.416 Component 415

[LABEL] neutral [PRED] neutral [COEFF] 26.5738

[P] A man with brown hair walking his bicycle across the street.

[H] A man heading to work.

[LABEL] *neutral* [PRED] *neutral* [COEFF] 24.9506  
[P] An asian man wearing a black suit stands near a dark - haired woman and a brown - haired woman.  
[H] The man is a businessman.

[LABEL] *neutral* [PRED] *neutral* [COEFF] 20.1470  
[P] A girl in a dress is walking down the street and the street is full of trees.  
[H] The girl is going to school.

[LABEL] *neutral* [PRED] *neutral* [COEFF] 20.0295  
[P] A man in a blue jumpsuit and red helmet is climbing up a ladder and another man is watching him.  
[H] The two guys work in construction.

[LABEL] *neutral* [PRED] *neutral* [COEFF] 19.6826  
[P] A woman gets out of a very small red car.  
[H] A woman is going to work.

[LABEL] *neutral* [PRED] *neutral* [COEFF] 19.6275  
[P] A man on a cellphone outside the glass doors of a building with a suitcase.  
[H] A man is making a business deal while traveling.

[LABEL] *neutral* [PRED] *neutral* [COEFF] 18.7856  
[P] Three men in hard hats and sunglasses approach a large white freight truck.  
[H] Three men are on the way to work.

[LABEL] *neutral* [PRED] *neutral* [COEFF] 18.2993  
[P] An asian woman is looking out of a window on a train.  
[H] The woman is taking a train to work.

[LABEL] *neutral* [PRED] *neutral* [COEFF] 17.3517  
[P] Man in white shirt stands next to man in black shirt who appears to have had his fingers amputated at the first knuckle.  
[H] A doctor examining a patient.

[LABEL] *neutral* [PRED] *neutral* [COEFF] 17.1437  
[P] An older man wearing a tan coat is riding his bicycle down the street.  
[H] The man is riding to work

[LABEL] *neutral* [PRED] *neutral* [COEFF] 16.8158  
[P] A woman crosses a street while traffic lines up in the opposite direction.  
[H] A woman is on her way to work

[LABEL] *neutral* [PRED] *neutral* [COEFF] 16.8002  
[P] A woman with a large purse and boots walking in a marble - looking hall.  
[H] A woman is at her office.

[LABEL] *neutral* [PRED] *neutral* [COEFF] 16.4936  
[P] A group of people inside a church, some of them are staring at a man standing up.

[H] A group of people are attending a community meeting in a church.

[LABEL] **contradiction** [PRED] **neutral** [COEFF] 16.0483

[P] Many people wearing white clothing and red bandannas are walking down a hallway.

[H] People are gathered for a funeral.

[LABEL] **neutral** [PRED] **neutral** [COEFF] 16.0277

[P] Five men are talking in a room that has computers in it.

[H] Five men are having a work meeting.

[LABEL] **neutral** [PRED] **neutral** [COEFF] 15.9919

[P] A man in a short - sleeved button up shirt stands in front of a crowd all sitting in chairs in front of a wooden building.

[H] The man is the president of the organization they are in front of.

## 1.417 Component 416

[LABEL] **contradiction** [PRED] **contradiction** [COEFF] 5.7602

[P] A man is elevated cutting steel beams.

[H] A man is changing the oil on his car.

[LABEL] **contradiction** [PRED] **contradiction** [COEFF] 5.7471

[P] A woman is sorting through food on the sidewalk.

[H] The woman is getting on the bus.

[LABEL] **contradiction** [PRED] **contradiction** [COEFF] 5.1564

[P] A crowd of people stands attentively in a plaza with buildings in the background.

[H] A crowd of people lounges around outside a cafe.

[LABEL] **contradiction** [PRED] **contradiction** [COEFF] 4.7433

[P] A man wearing a hi - viz jacket is drilling into the road.

[H] A man on his lunch break.

[LABEL] **contradiction** [PRED] **contradiction** [COEFF] 4.7425

[P] People are coming down the steps of a stone building with an arched glassed entrance.

[H] The people are running from the brand new concrete building.

[LABEL] **contradiction** [PRED] **contradiction** [COEFF] 4.6578

[P] A black dog's head rises above some water.

[H] A dog is in the cat's litter box.

[LABEL] **contradiction** [PRED] **contradiction** [COEFF] 4.6118

[P] A man with two blond children looking at a house over a rail in autumn.

[H] Just a dog sleeping.

[LABEL] **contradiction** [PRED] **contradiction** [COEFF] 4.4670

[P] A man wearing a red football uniform and gray gloves looks to the left.

[H] A man is in a rocket.

[LABEL] **contradiction** [PRED] **contradiction** [COEFF] 4.4665

[P] A man waiting in the subway area next to the bus, reading the paper.

[H] A man is waiting for the microwave to beep while he waits.

[LABEL] **contradiction** [PRED] **contradiction** [COEFF] 4.4530

[P] A young woman wearing a blue coat and brown leggings getting ready to walk into a building, after riding her bicycle.

[H] The young lady left in her car

[LABEL] **contradiction** [PRED] **contradiction** [COEFF] 4.4302

[P] A dog runs while holding an object in its mouth.

[H] The cat fetches the ball.

[LABEL] **contradiction** [PRED] **contradiction** [COEFF] 4.3367

[P] A person dressed in a colorful costume is holding some papers.

[H] The cat jumps on the dog

[LABEL] **contradiction** [PRED] **contradiction** [COEFF] 4.2352

[P] A lady is riding a white horse.

[H] A woman giving her cat a bath.

[LABEL] **neutral** [PRED] **contradiction** [COEFF] 4.1728

[P] A person is a shiny hat, a shiny coat, and jeans has his head facing down.

[H] A person is checking his phone.

[LABEL] **contradiction** [PRED] **contradiction** [COEFF] 4.0450

[P] Construction workers standing outside looking at wires above them.

[H] Workers are having tea on their break.

[LABEL] **contradiction** [PRED] **contradiction** [COEFF] 3.9891

[P] An old man with a beard and a young boy in a striped sweater peer inside a tent.

[H] The man and boy stayed in a hotel the whole day

## 1.418 Component 417

[LABEL] **contradiction** [PRED] **contradiction** [COEFF] 22.3781

[P] A child sits with its head on its arm in a room.

[H] A kid runs around

[LABEL] **contradiction** [PRED] **contradiction** [COEFF] 19.5891

[P] An older man sits on a green park bench next to a tree.

[H] A man is jogging

[LABEL] **contradiction** [PRED] **contradiction** [COEFF] 18.6332  
[P] Singer sits down while performing.  
[H] The singer is running across the stage.

[LABEL] **contradiction** [PRED] **contradiction** [COEFF] 18.5421  
[P] A young man is leaning on a tree in the grass and reading a book.  
[H] A man is running

[LABEL] **contradiction** [PRED] **contradiction** [COEFF] 18.3780  
[P] A bearded gentleman sitting against a handrail by near a bridge by the side of a river.  
[H] A man running next to the river.

[LABEL] **contradiction** [PRED] **contradiction** [COEFF] 17.9053  
[P] A man with glasses is sitting a chair playing the oboe while a man in a purple shirt plays percussion and spectators look on.  
[H] The men are running down the street.

[LABEL] **contradiction** [PRED] **contradiction** [COEFF] 17.3898  
[P] Two girls sit along a lake while a man in the background fishes  
[H] Two girls run around a lakehouse

[LABEL] **contradiction** [PRED] **contradiction** [COEFF] 17.3156  
[P] A blond - haired man dressed in dark colors sitting next to a woman dressed in green and wearing a black beret.  
[H] A man and a woman are jogging.

[LABEL] **contradiction** [PRED] **contradiction** [COEFF] 16.6226  
[P] A zebra is nibbling on some grass.  
[H] The zebra is running

[LABEL] **contradiction** [PRED] **contradiction** [COEFF] 16.6031  
[P] A young boy lying on the floor with his artwork.  
[H] The boy is running

[LABEL] **contradiction** [PRED] **contradiction** [COEFF] 15.9687  
[P] A man in a black baseball cap is sitting on a bench.  
[H] A man is running toward first base.

[LABEL] **contradiction** [PRED] **contradiction** [COEFF] 14.9505  
[P] A woman wearing glasses is sitting down at a table with glasses, a bottle, and a bird on it.  
[H] The person is running after a cab.

[LABEL] **contradiction** [PRED] **contradiction** [COEFF] 14.8982  
[P] Elderly gentleman in brown trench - coat and woman in orange - brown fur coat sitting at table, woman has her back to camera.  
[H] A man and woman are jogging.

[LABEL] **contradiction** [PRED] **contradiction** [COEFF] 14.5733

[P] Three men are sitting next to each other and the man in the middle is reading a book.

[H] The me are running around.

[LABEL] **contradiction** [PRED] **contradiction** [COEFF] 14.5640

[P] A lady sitting under a shelter, eating with her dog.

[H] A lady and her dog jogging

[LABEL] **contradiction** [PRED] **contradiction** [COEFF] 14.5288

[P] Three people wearing mask sitting down

[H] Three people with running around with masks on.

## 1.419 Component 418

[LABEL] **entailment** [PRED] **entailment** [COEFF] 19.4413

[P] Nice sunny day by the pier.

[H] There is a pier.

[LABEL] **entailment** [PRED] **entailment** [COEFF] 18.6819

[P] A young woman is sitting on a red bus looking out the window.

[H] There is a red bus.

[LABEL] **entailment** [PRED] **entailment** [COEFF] 17.7619

[P] A person performing a trick on a snowboard that says " lib tech " on the bottom.

[H] There is a snowboard.

[LABEL] **entailment** [PRED] **entailment** [COEFF] 15.9297

[P] A police officer is performing with a puppet that looks like a bird.

[H] There is a puppet.

[LABEL] **entailment** [PRED] **entailment** [COEFF] 15.6336

[P] Man with star tattoo wearing black t - shirt and shorts admiring art displayed outside.

[H] There is art.

[LABEL] **entailment** [PRED] **entailment** [COEFF] 14.6984

[P] A man wearing a long - sleeved gray shirt and dark pants is walking through a gray stone archway.

[H] There is an archway.

[LABEL] **entailment** [PRED] **entailment** [COEFF] 14.5411

[P] A man and women looking at magazines in a window.

[H] There are magazines in the window.

[LABEL] **entailment** [PRED] **entailment** [COEFF] 14.4532

[P] Metal supports make a repeating x shape along the walls of the station.

[H] The station has walls.



[LABEL] **entailment** [PRED] **entailment** [COEFF] 14.4390

[P] Two men playing violins with sheep music.

[H] There is sheep music.

[LABEL] **entailment** [PRED] **entailment** [COEFF] 13.8770

[P] Several people standing around a bowl, in which one man is manipulating a brown object.

[H] The bowl contains a brown object.

[LABEL] **entailment** [PRED] **entailment** [COEFF] 13.6415

[P] A man wearing a black shirt is standing next to a pole in a grassy field.

[H] There is a pole in the grassy field.

[LABEL] **entailment** [PRED] **entailment** [COEFF] 13.5961

[P] A man doing a bicycle trick.

[H] There is a bicycle present.

[LABEL] **entailment** [PRED] **entailment** [COEFF] 13.3255

[P] A man is crossing a street at a crosswalk.

[H] The street has a crosswalk.

[LABEL] **entailment** [PRED] **entailment** [COEFF] 13.2453

[P] A group of boys are playing basketball and a boy in a brown shirt is throwing a basketball into the basket.

[H] There is a basketball.

[LABEL] **entailment** [PRED] **entailment** [COEFF] 13.1827

[P] A child on a rock formation.

[H] There is a rock.

[LABEL] **entailment** [PRED] **entailment** [COEFF] 13.1417

[P] A group of people gathered for a celebration.

[H] There is an occasion to celebrate.

## 1.420 Component 419

[LABEL] **entailment** [PRED] **entailment** [COEFF] 44.8315

[P] A man and a woman are talking in a restaurant.

[H] The man and woman talk.

[LABEL] **neutral** [PRED] **entailment** [COEFF] 38.6008

[P] A man and woman are kissing on the corner of a street.

[H] The man and woman are a couple.

[LABEL] **entailment** [PRED] **entailment** [COEFF] 35.3362

[P] A man and a woman are talking in a restaurant.

[H] A man and woman converse.

[LABEL] entailment [PRED] entailment [COEFF] 32.4690  
[P] A man and a woman enjoying a meal out.  
[H] A man and a woman are eating together.

[LABEL] entailment [PRED] entailment [COEFF] 32.0631  
[P] A man and a woman in a big red dress dancing.  
[H] A man and a woman in a big dress dancing.

[LABEL] entailment [PRED] entailment [COEFF] 22.9011  
[P] A man and a blond woman whisper to each other in a bar.  
[H] A man and a woman are close to one another.

[LABEL] entailment [PRED] entailment [COEFF] 22.3890  
[P] A man and a woman with painted faces promoting dr. faustus.  
[H] The man and woman painted their faces.

[LABEL] entailment [PRED] entailment [COEFF] 21.9449  
[P] A man and woman mingle and talk to one another.  
[H] Men and women are talking

[LABEL] entailment [PRED] entailment [COEFF] 21.4131  
[P] A man and a woman are filling syringes with what appears to be food related products.  
[H] A man and woman fill syringes

[LABEL] entailment [PRED] entailment [COEFF] 16.8188  
[P] A guy with a sword and traditional fighting gear is getting ready for a fight.  
[H] A man has a weapon.

[LABEL] entailment [PRED] entailment [COEFF] 13.6225  
[P] A man and a woman sit on wicker couches in a large white room.  
[H] There is a man and woman sitting on couches.

[LABEL] neutral [PRED] entailment [COEFF] 12.4206  
[P] A male has an angry look has he hold a container in front of a female.  
[H] The man is mad.

[LABEL] entailment [PRED] entailment [COEFF] 12.0503  
[P] A guy with colored clothes is with a bird  
[H] A man has a bird with him

[LABEL] entailment [PRED] entailment [COEFF] 11.9602  
[P] A man is looking at what seems to be a cardboard cutout of a woman in a kitchen.  
[H] A man is looking.

[LABEL] entailment [PRED] entailment [COEFF] 11.6713  
[P] A large man and large woman sitting on a park bench with a bottle of soda between them.

[H] A large man and large woman sitting on a park bench.

[LABEL] **entailment** [PRED] **entailment** [COEFF] 11.4803

[P] A woman in a white and tan striped dress sits in the lap of a man with a tan collared shirt.

[H] A woman is near a man.

## 1.421 Component 420

[LABEL] **entailment** [PRED] **entailment** [COEFF] 19.3641

[P] A man and a woman are dancing together beside a man playing music.

[H] A man and a woman are dancing.

[LABEL] **entailment** [PRED] **entailment** [COEFF] 18.7140

[P] A young man and woman dressed in play chef's hats are eating food at a table.

[H] A man and woman are eating at a table

[LABEL] **entailment** [PRED] **entailment** [COEFF] 17.1429

[P] Two people ( a man and a woman ) leaning up against a building conversing

[H] A man and woman lean against a building.

[LABEL] **entailment** [PRED] **entailment** [COEFF] 16.0529

[P] A man and a little girl are sitting on a sidewalk near a blue bag eating.

[H] A man and girl are sitting.

[LABEL] **entailment** [PRED] **entailment** [COEFF] 15.6583

[P] A man and a woman get dressed in a messy bedroom.

[H] A man and woman are getting dressed.

[LABEL] **entailment** [PRED] **entailment** [COEFF] 15.5551

[P] A man and woman on a beach, jumping.

[H] A man and a woman are jumping on a beach.

[LABEL] **entailment** [PRED] **entailment** [COEFF] 15.4603

[P] A man and a woman with painted faces promoting dr. faustus.

[H] The man and woman painted their faces.

[LABEL] **entailment** [PRED] **entailment** [COEFF] 15.2703

[P] A man in blue and a woman in brown, with orange hair, are hugging.

[H] A man and a woman embrace each other.

[LABEL] **entailment** [PRED] **entailment** [COEFF] 13.4492

[P] The man, the wife and the son are playing together.

[H] A man and wife are playing together with their son.

[LABEL] **entailment** [PRED] **entailment** [COEFF] 13.3802

[P] A man and a woman sit on wicker couches in a large white room.

[H] There is a man and woman sitting on couches.

[LABEL] **entailment** [PRED] **entailment** [COEFF] 13.0870

[P] A long - haired man wearing a blue shirt and dark pants plays a guitar while sitting on a wood and metal bench with another man and woman in front of a joes cafe rainbow mural.

[H] The man and woman are in front of the joes cafe rainbow mural.

[LABEL] **entailment** [PRED] **entailment** [COEFF] 13.0255

[P] A man and a little girl shaking hands on the game field.

[H] A man and girl are shaking hands on the field

[LABEL] **entailment** [PRED] **entailment** [COEFF] 12.7931

[P] A young boy and girl wearing coats, hats, and boots are at the beach looking at something that they found.

[H] A young boy and girl are on the beach

[LABEL] **neutral** [PRED] **entailment** [COEFF] 12.5602

[P] A man and woman pose on a couch.

[H] A man and woman pose on their couch.

[LABEL] **entailment** [PRED] **entailment** [COEFF] 11.7707

[P] A blond woman holding something out in her hand while another woman and man walk past her.

[H] A blonde woman is passed by a man and a woman.

[LABEL] **entailment** [PRED] **entailment** [COEFF] 11.1861

[P] A man and a woman sit beside a table covered in books.

[H] A man and woman sit next to a table.

## 1.422 Component 421

[LABEL] **entailment** [PRED] **entailment** [COEFF] 78.2651

[P] A man and a dog running across shallow water on a beach.

[H] A man is outdoors.

[LABEL] **entailment** [PRED] **entailment** [COEFF] 68.7284

[P] Black dog running through a grassy area.

[H] The dog is outdoors.

[LABEL] **entailment** [PRED] **entailment** [COEFF] 62.2870

[P] Dog running on shore beside two geese in water

[H] The dog is running outdoors.

[LABEL] **entailment** [PRED] **entailment** [COEFF] 62.0381

[P] A brown dog swimming through a lake with a stick in his mouth.

[H] A dog is outdoors

[LABEL] **entailment** [PRED] **entailment** [COEFF] 54.0316

[P] A brown dog stands in a lush field with the stunning clouds and mountains behind it.  
[H] A dog stands outdoors.

[LABEL] entailment [PRED] entailment [COEFF] 53.7829  
[P] Two tri - colored short dogs run away from the camera in the trees.  
[H] A dog is outdoors.

[LABEL] entailment [PRED] entailment [COEFF] 52.8689  
[P] A brown dog is running in the sand.  
[H] A dog is running outdoors.

[LABEL] entailment [PRED] entailment [COEFF] 52.4020  
[P] A family hikes in the woods.  
[H] The family is outdoors

[LABEL] entailment [PRED] entailment [COEFF] 52.1366  
[P] A small group of people hikes through a forest during the day.  
[H] They are outdoors.

[LABEL] entailment [PRED] entailment [COEFF] 51.9960  
[P] Two dogs running side by side in water.  
[H] There are dogs running outdoors.

[LABEL] entailment [PRED] entailment [COEFF] 51.4706  
[P] The brown dog is running on the grass.  
[H] The dog is outdoors.

[LABEL] entailment [PRED] entailment [COEFF] 51.4150  
[P] A dog is shaking itself dry on the beach next to the ocean.  
[H] A dog outdoors.

[LABEL] entailment [PRED] entailment [COEFF] 50.7043  
[P] A young boy spins a merry - go - round, barefoot at the park.  
[H] A young boy is outdoors.

[LABEL] entailment [PRED] entailment [COEFF] 49.7635  
[P] A group of people walk in a park by a body of water with some dogs.  
[H] The people are outdoors.

[LABEL] entailment [PRED] entailment [COEFF] 47.9479  
[P] A person riding a bike in the woods.  
[H] A human is outdoors.

[LABEL] entailment [PRED] entailment [COEFF] 47.6724  
[P] Four shirtless men hike up a canyon.  
[H] Four men are outdoors.

## 1.423 Component 422

[LABEL] **neutral** [PRED] **neutral** [COEFF] 22.5423

[P] People are climbing on a rope bridge that is crossing a stream.

[H] The people on the bridge are scared of falling into the stream.

[LABEL] **neutral** [PRED] **neutral** [COEFF] 21.4616

[P] A female employee of a movie theater on a ladder placing letters to display the showing for that evening.

[H] The woman is afraid of heights and is afraid she might fall.

[LABEL] **neutral** [PRED] **neutral** [COEFF] 21.3683

[P] A man in a white shirt and a tie is speaking to people.

[H] The tie is ugly.

[LABEL] **neutral** [PRED] **neutral** [COEFF] 21.0915

[P] A young women, dressed in a dark blue dance costume is participating in a cheer competition.

[H] The women are nervous before their performance.

[LABEL] **neutral** [PRED] **neutral** [COEFF] 20.7943

[P] A man with black hair sits in a restaurant with a glass of beer.

[H] A man is making a disgusted face at the glass of rancid beer that he is drinking.

[LABEL] **neutral** [PRED] **neutral** [COEFF] 19.4508

[P] Old man in a yellow shirt standing in front of a yellow building next to a pay phone.

[H] The yellow shirt makes the man itchy

[LABEL] **neutral** [PRED] **neutral** [COEFF] 19.4103

[P] Two men are wearing white aprons in a fish market.

[H] The aprons are dirty.

[LABEL] **entailment** [PRED] **neutral** [COEFF] 19.2760

[P] A girl with a camera stands before a body of water.

[H] She will get wet if she goes too much closer

[LABEL] **neutral** [PRED] **neutral** [COEFF] 18.8555

[P] A man and two women are seated outside on a wall next to a sheet of water with a tall white structure in the background.

[H] People are tired from sight seeing.

[LABEL] **neutral** [PRED] **neutral** [COEFF] 18.1578

[P] A man with a mask and various pieces of clothing.

[H] The man is a criminal

[LABEL] **neutral** [PRED] **neutral** [COEFF] 17.2685

[P] A man is squirting water into a white dog's mouth with a squirt gun.

[H] The dog gets annoyed when the man squirts water.

[LABEL] **neutral** [PRED] **neutral** [COEFF] 17.1961

[P] A lady in white shorts and a black tank top is riding a bike along the beach.

[H] A lady in shorts is wearing a bike because she thinks she is out of shape.

[LABEL] **neutral** [PRED] **neutral** [COEFF] 17.1513

[P] A group of people are taking pictures, with one person standing on a plastic storage tub atop a table.

[H] The man on top of the plastic storage tub is about to fall.

[LABEL] **neutral** [PRED] **neutral** [COEFF] 16.6361

[P] Old man in a suit taking a picture

[H] The man wearing the suit is itchy

[LABEL] **neutral** [PRED] **neutral** [COEFF] 16.3941

[P] A crowd stands and watches a man perform on stage.

[H] The crowd is angry

[LABEL] **neutral** [PRED] **neutral** [COEFF] 16.3660

[P] A doctor and is staff is operating on a patient.

[H] A patient has a tumor that needs to be removed.

## 1.424 Component 423

[LABEL] **contradiction** [PRED] **contradiction** [COEFF] 41.0129

[P] A boy is filling a unicef bucket with water with an older boy, possibly an older brother.

[H] A girl is filling a bucket

[LABEL] **contradiction** [PRED] **contradiction** [COEFF] 39.2779

[P] A little boy is playing in water in the street and wearing a wet t - shirt, as a man in a red shirt and a woman in a blue shirt are walking on the sidewalk behind him.

[H] A girl is playing in the water.

[LABEL] **contradiction** [PRED] **contradiction** [COEFF] 39.2480

[P] A boy gives being in the snow two thumbs up.

[H] The girl is in the snow.

[LABEL] **contradiction** [PRED] **contradiction** [COEFF] 38.8027

[P] A boy performs a one - handed trick on his bicycle by a rundown building.

[H] A girl is playing on a playground.

[LABEL] **contradiction** [PRED] **contradiction** [COEFF] 38.5131

[P] A boy with an orange shirt and blue jeans gets a ride on a man's shoulders.

[H] A girl is riding on a man's shoulders.

[LABEL] **contradiction** [PRED] **contradiction** [COEFF] 38.0865

[P] A boy in the middle of a pitch at a baseball game.

[H] A girl is in the middle of a pitch at a baseball game.

[LABEL] **contradiction** [PRED] **contradiction** [COEFF] 36.0750

[P] A small boy is playing at a water fountain

[H] A girl is swimmin in a pool.

[LABEL] **contradiction** [PRED] **contradiction** [COEFF] 35.4381

[P] A little boy is floating in a pool with innertubes.

[H] A girl is jumping into a pool.

[LABEL] **contradiction** [PRED] **contradiction** [COEFF] 35.3956

[P] A little boy with a pacifier in his mouth stands in a park with a goose.

[H] A girl is playing catch.

[LABEL] **contradiction** [PRED] **contradiction** [COEFF] 35.2723

[P] A little boy in a blue shirt is playing on the playground.

[H] A young girl is playing on the playground

[LABEL] **contradiction** [PRED] **contradiction** [COEFF] 33.0780

[P] A boy rides down a slide into a small backyard pool.

[H] A girl is taking a bath.

[LABEL] **contradiction** [PRED] **contradiction** [COEFF] 32.8930

[P] A little boy with baby food on his face.

[H] A girl is sleeping.

[LABEL] **contradiction** [PRED] **contradiction** [COEFF] 31.8471

[P] A boy is being splashed by a large wave in the sea.

[H] A girl is relaxing in the sun.

[LABEL] **contradiction** [PRED] **contradiction** [COEFF] 30.7370

[P] A boy is surfing towards the beach on a green surfboard.

[H] A girl is surfing towards the beach on an inflatable shark.

[LABEL] **contradiction** [PRED] **contradiction** [COEFF] 30.4864

[P] A boy wearing a life jacket has an apple in his mouth.

[H] A girl is drinking a cocktail.

[LABEL] **contradiction** [PRED] **contradiction** [COEFF] 30.2605

[P] A boy is playing on a rotating disk in the playground.

[H] A girl is playing on a playground

## 1.425 Component 424

[LABEL] **neutral** [PRED] **neutral** [COEFF] 19.8395



[P] A blond woman in a pink jacket is signing a petition.

[H] A woman signs a petition at a cancer awareness rally.

[LABEL] **neutral** [PRED] **neutral** [COEFF] 17.9329

[P] A woman in a gray dress is juggling tennis balls.

[H] A woman is juggling tennis balls at a circus.

[LABEL] **neutral** [PRED] **neutral** [COEFF] 17.4865

[P] In the midst of a crowd of people, a woman in a black t - shirt has her arm around a man in a brown hat.

[H] A woman and a man are at an outdoor concert.

[LABEL] **neutral** [PRED] **neutral** [COEFF] 17.2622

[P] A man in a red shirt is eating.

[H] A man is eating outside at a fourth of july party.

[LABEL] **neutral** [PRED] **neutral** [COEFF] 16.4869

[P] A woman wearing a horse costume around her body with a helmet on her head.

[H] The women is going to a party

[LABEL] **neutral** [PRED] **neutral** [COEFF] 16.2097

[P] Two women in elaborate japanese costumes.

[H] The women are performing in a play.

[LABEL] **neutral** [PRED] **neutral** [COEFF] 15.9965

[P] A man with a cigarette hanging out of his mouth rides a blue motorcycle in front of others on motorcycles.

[H] The man is in new york city.

[LABEL] **neutral** [PRED] **neutral** [COEFF] 15.7656

[P] A man opening novelty gifts including a large plush green bear.

[H] A man is opening gifts at his birthday party.

[LABEL] **neutral** [PRED] **neutral** [COEFF] 15.6971

[P] Three children are playing a game of twister.

[H] Kids are playing twister at a birthday party.

[LABEL] **neutral** [PRED] **neutral** [COEFF] 15.3441

[P] A man dressed as a clown folding a balloon animal.

[H] The man is dressed as a clown at a child's birthday party.

[LABEL] **neutral** [PRED] **neutral** [COEFF] 14.9111

[P] Woman performing with hula hoops wearing a red dress in front of an audience.

[H] The performer is putting on a show at the county fair.

[LABEL] **neutral** [PRED] **neutral** [COEFF] 14.7641

[P] A child is holding a bunch of balloons in front of their face.

[H] The child is going to a birthday party.

[LABEL] **contradiction** [PRED] **neutral** [COEFF] 14.5701

[P] A teenage girl dressed in a black and purple leotard is posing in an arabesque while twirling a magenta ribbon.

[H] A teenage girl is hanging out with her friends at the mall.

[LABEL] **neutral** [PRED] **neutral** [COEFF] 14.1567

[P] A young boy raises his hand, as other young kids laugh in the back.

[H] The kids are at an outdoor concert.

[LABEL] **neutral** [PRED] **neutral** [COEFF] 13.7431

[P] A girl blows into a large yellow balloon.

[H] A girl is inflating a balloon for a birthday party

[LABEL] **neutral** [PRED] **neutral** [COEFF] 13.0187

[P] 6 cheerleaders in white and orange outfits and white boots with silver and teal pompoms.

[H] Cheerleaders are cheering for a football team.

## 1.426 Component 425

[LABEL] **entailment** [PRED] **entailment** [COEFF] 13.2910

[P] A man and a woman, both in hats, stand on the sidewalk in a busy city.

[H] People in hats on a city sidewalk.

[LABEL] **entailment** [PRED] **entailment** [COEFF] 10.7922

[P] Two men and two women looking over a fence at a big green mountain.

[H] People look at a mountain.

[LABEL] **entailment** [PRED] **entailment** [COEFF] 10.1998

[P] A yellow dog runs through green grass.

[H] A yellow dog is running.

[LABEL] **entailment** [PRED] **entailment** [COEFF] 9.9277

[P] Several basketball players are grabbing for the ball during a game.

[H] The people are playing sports.

[LABEL] **entailment** [PRED] **entailment** [COEFF] 8.4917

[P] The men are wearing white suits to protect themselves.

[H] People dressed in protective suits.

[LABEL] **entailment** [PRED] **entailment** [COEFF] 8.3829

[P] A few young men in a rollerblade race.

[H] The men are racing.

[LABEL] **entailment** [PRED] **entailment** [COEFF] 7.9421

[P] A brown dog running through the water.

[H] The dog is running.

[LABEL] **neutral** [PRED] **neutral** [COEFF] 7.7576  
 [P] A woman gasps while opening a present.  
 [H] A large woman gasping.

[LABEL] **entailment** [PRED] **entailment** [COEFF] 7.6748  
 [P] A black dog runs through the water.  
 [H] The dog is running.

[LABEL] **entailment** [PRED] **entailment** [COEFF] 7.4902  
 [P] Woman rolling a ball down a bowling alley.  
 [H] A lady is bowling.

[LABEL] **neutral** [PRED] **entailment** [COEFF] 7.4317  
 [P] Train construction workers talking to each other during project.  
 [H] A workers are working train project

[LABEL] **entailment** [PRED] **entailment** [COEFF] 7.4150  
 [P] Two cyclists competing in road race, one in front of the other.  
 [H] Two people are racing.

[LABEL] **entailment** [PRED] **entailment** [COEFF] 7.3350  
 [P] Man in purple shirt surrounded by others.  
 [H] A group surrounds a man.

[LABEL] **entailment** [PRED] **entailment** [COEFF] 7.3158  
 [P] Two ballet dancers are in the middle of a choreographed dance.  
 [H] The two people are doing ballet.

[LABEL] **entailment** [PRED] **entailment** [COEFF] 7.0573  
 [P] A dog in a field.  
 [H] There is an animal outside.

[LABEL] **entailment** [PRED] **entailment** [COEFF] 6.9397  
 [P] The horse on the right is red.  
 [H] There is a horse.

### 1.427 Component 426

[LABEL] **entailment** [PRED] **contradiction** [COEFF] 157.1756  
 [P] While standing on a stone stairway, a woman reaches towards the pink blossoms on a nearby tree.  
 [H] The woman is outdoors.

[LABEL] **entailment** [PRED] **contradiction** [COEFF] 143.9353  
 [P] Kids riding on their bicycles near a mound of dirt with a hovel from a backhoe in front of the mound.  
 [H] The kids are outdoors.

[LABEL] entailment [PRED] contradiction [COEFF] 138.0003  
[P] A boy standing next to large fountain, with an office building in the background.  
[H] The boy is outdoors.

[LABEL] entailment [PRED] contradiction [COEFF] 132.9579  
[P] An asian boy in glasses and a yellow shirt holds a blue bag while standing between two parking spaces on the street.  
[H] The boy is outdoors.

[LABEL] entailment [PRED] contradiction [COEFF] 121.1179  
[P] Cameramen and other men in orange hard hats stand atop a platform overlooking the wide open vista.  
[H] The cameraman and the other men are outdoors.

[LABEL] entailment [PRED] neutral [COEFF] 119.8297  
[P] A group of people on a walkway.  
[H] The people are outdoors.

[LABEL] entailment [PRED] contradiction [COEFF] 111.5667  
[P] A group of people wearing white robes with a flame design and shiny badges reflecting are posing in front of a building with two man statues.  
[H] The people are outdoors.

[LABEL] entailment [PRED] contradiction [COEFF] 110.6199  
[P] Three men seated on an elephant in a small village.  
[H] The men are outdoors.

[LABEL] entailment [PRED] neutral [COEFF] 109.4572  
[P] Two men on a motorcycle with buckets and canisters.  
[H] The men are outdoors.

[LABEL] entailment [PRED] neutral [COEFF] 103.0802  
[P] A black dog runs in front of a large brown and white bull.  
[H] The dog and bull are outdoors.

[LABEL] contradiction [PRED] contradiction [COEFF] 101.0317  
[P] Man standing behind chair in an empty barber shop  
[H] The man is outdoors.

[LABEL] entailment [PRED] contradiction [COEFF] 100.6110  
[P] People waiting to enter a white building through an entry way with an orange handwritten sign to the left of it.  
[H] People are outdoors

[LABEL] entailment [PRED] contradiction [COEFF] 95.8783  
[P] A man is standing in front of some red sticks trying to hit a ball.  
[H] The man is outdoors.

[LABEL] entailment [PRED] neutral [COEFF] 95.8436  
[P] A man looks towards the camera as he sits at an outside table.  
[H] The man is outdoors.

[LABEL] entailment [PRED] contradiction [COEFF] 94.5567  
[P] A surfer rides a medium sized wave.  
[H] The surfer is outdoors.

[LABEL] entailment [PRED] contradiction [COEFF] 93.8695  
[P] A group of people gather in the parking lot of a water park.  
[H] The group of people are outdoors.

## 1.428 Component 427

[LABEL] contradiction [PRED] contradiction [COEFF] 14.8656  
[P] A group of people are walking in front of a large stone building.  
[H] The people are riding bikes.

[LABEL] contradiction [PRED] contradiction [COEFF] 14.4943  
[P] A man walking past two dogs tied up outside a storefront.  
[H] A man is riding a go cart.

[LABEL] contradiction [PRED] contradiction [COEFF] 14.1210  
[P] A person is walking on the bridge over a canal, and buildings are bright under sun and clear sky.  
[H] The person is riding their bike up the hill.

[LABEL] contradiction [PRED] contradiction [COEFF] 13.7661  
[P] Two women walking on an outdoor trail.  
[H] Two ladies are having dinner.

[LABEL] contradiction [PRED] contradiction [COEFF] 12.9951  
[P] A young boy is walking on what seems to be a chilly day, though the path he's on seems to disappear into a sea of green grass.  
[H] The boy rides his bike through the rocks.

[LABEL] contradiction [PRED] contradiction [COEFF] 12.4532  
[P] A person walks in the valley between tall mountains.  
[H] A person is cooking dinner.

[LABEL] contradiction [PRED] contradiction [COEFF] 12.0790  
[P] A couple in black clothes are walking towards a white gate.  
[H] The couple are driving a car.

[LABEL] contradiction [PRED] contradiction [COEFF] 11.7028  
[P] Two children walking on a wooden path through the woods.  
[H] Kids are riding bikes in a park.

[LABEL] **contradiction** [PRED] **contradiction** [COEFF] 11.4991

[P] A lady wearing a batman shirt is walking along the boardwalk.

[H] A woman is swimming in a lake.

[LABEL] **contradiction** [PRED] **contradiction** [COEFF] 11.2252

[P] Two people walking along a huge desert with a statue in the distance.

[H] Two people are eating a meal at a cafe.

[LABEL] **contradiction** [PRED] **contradiction** [COEFF] 11.0632

[P] A bunch of young girls are walking in the sand.

[H] The young girls are swimming in a pool.

[LABEL] **contradiction** [PRED] **contradiction** [COEFF] 10.9497

[P] A marching band, wearing red and black uniforms with tall fur hats, are walking down the street as they play their instruments.

[H] The band is sitting inside a restaurant

[LABEL] **contradiction** [PRED] **contradiction** [COEFF] 10.8232

[P] People walking on street along fence covered in advertisement posters.

[H] The people are climbing the fence.

[LABEL] **contradiction** [PRED] **contradiction** [COEFF] 10.2999

[P] A group of people walking between two buildings.

[H] A group of students are sitting in class.

[LABEL] **contradiction** [PRED] **contradiction** [COEFF] 10.2693

[P] Two girls walking through an alley.

[H] Two girls are sleeping.

[LABEL] **contradiction** [PRED] **contradiction** [COEFF] 10.2494

[P] Group of people walking on the heavy snow.

[H] A group of people are skiing quickly in the heavy snow.

## 1.429 Component 428

[LABEL] **contradiction** [PRED] **contradiction** [COEFF] 8.9006

[P] Several small children are playing basketball.

[H] A man is crushed by a red vehicle.

[LABEL] **contradiction** [PRED] **contradiction** [COEFF] 6.6518

[P] Several women stand on a city street with tall buildings.

[H] A man runs across the street.

[LABEL] **contradiction** [PRED] **contradiction** [COEFF] 6.0250

[P] A man in a gray sweater and brown pants is lying down on a couch and reading a book.

[H] A woman rips her hair out.

[LABEL] contradiction [PRED] contradiction [COEFF] 5.5803

[P] A young boy, dressed in winter clothing, has his hand on a tree while standing in shin deep snow.

[H] A young man chases girls in bikinis at the beach.

[LABEL] contradiction [PRED] contradiction [COEFF] 5.5038

[P] A woman stands on a balcony wearing a knee length dress taking pictures, with vines that cover the large windows.

[H] A man runs down stairs.

[LABEL] contradiction [PRED] contradiction [COEFF] 5.5026

[P] A man with dreadlocks is talking on a cellular phone.

[H] A man throws a stick

[LABEL] contradiction [PRED] contradiction [COEFF] 5.4454

[P] Two male children cleaning up leaves in a parking lot.

[H] A lone warrior readies himself to face a dragon.

[LABEL] contradiction [PRED] contradiction [COEFF] 5.2911

[P] Three people walking on a trail in the middle of the day.

[H] A man is crushed by a red vehicle.

[LABEL] contradiction [PRED] contradiction [COEFF] 4.9935

[P] Two boys are walking along the stage whilst being watched by several people.

[H] Two boy fall off their bikes.

[LABEL] contradiction [PRED] contradiction [COEFF] 4.9873

[P] Guy playing cricket lying on the grass

[H] A man leaping over a curb.

[LABEL] contradiction [PRED] contradiction [COEFF] 4.8994

[P] A man standing on a city street.

[H] A woman runs across the road.

[LABEL] contradiction [PRED] contradiction [COEFF] 4.8872

[P] A man wearing a blue jacket holding a santa claus statue on top of his head

[H] A girl throws a statue to the ground.

[LABEL] neutral [PRED] contradiction [COEFF] 4.5247

[P] Five men stand on construction scaffolding with paints splattered on them as they appear fascinated by something to the left, one even records the unseen event on a phone.

[H] The painters look inside the window of the house as a woman is getting undressed.

[LABEL] contradiction [PRED] contradiction [COEFF] 4.4903

[P] The two mother is walking bringing their kid.

[H] A man steals a kid

[LABEL] **neutral** [PRED] **contradiction** [COEFF] 4.4750  
[P] A man in a white shirt holds onto a bicyclist, surrounded by more bicyclists.  
[H] A man fell off his bicycle

[LABEL] **contradiction** [PRED] **contradiction** [COEFF] 4.4724  
[P] A woman taking her wallet out of her purse at a vendor stand.  
[H] The man pulls out a gun to rob the vendor stand.

## 1.430 Component 429

[LABEL] **entailment** [PRED] **entailment** [COEFF] 24.5076  
[P] A man carves an ice block with a chainsaw.  
[H] A man is working with a dangerous tool.

[LABEL] **entailment** [PRED] **entailment** [COEFF] 23.8756  
[P] A young girl in white has pinned down another girl wearing blue that is lying face down on the ground.  
[H] Two young girls engaging in physical activity.

[LABEL] **entailment** [PRED] **entailment** [COEFF] 22.2141  
[P] A man with an orange top running in a grassy area.  
[H] A man dressed in orange is moving quickly.

[LABEL] **entailment** [PRED] **entailment** [COEFF] 20.1153  
[P] A crowd of men and women sitting and standing by a we are demanding sign.  
[H] The people are protesting.

[LABEL] **neutral** [PRED] **neutral** [COEFF] 19.3863  
[P] A muscular man in a black wife - beater and sweatpants is smoking a cigarette and giving a stern look.  
[H] The man is angry.

[LABEL] **neutral** [PRED] **entailment** [COEFF] 19.2794  
[P] A large brown dog is pushing a small boston terrier with his face while another dog watches.  
[H] Two dogs fighting

[LABEL] **neutral** [PRED] **entailment** [COEFF] 18.0543  
[P] A woman in a gray top and black and white checkered skirt and an ace bandage on her knee is dancing with a dark - haired man in a blue shirt and khaki pants.  
[H] A woman who has a knee injury is dancing with a man.

[LABEL] **neutral** [PRED] **neutral** [COEFF] 17.8711  
[P] A man wearing a yellow shirt is standing in front of a cement wall with drawings on it.  
[H] The man is looking at graffiti.

[LABEL] **neutral** [PRED] **entailment** [COEFF] 17.4979  
[P] A woman wearing a pink shirt and yellow helmet paddles around in a pink kayak.  
[H] A woman is in a kayak race.



[LABEL] **neutral** [PRED] **neutral** [COEFF] 17.1445

[P] A young man wearing nail polish and sitting on the floor is looking through a book while a young woman stands over him.

[H] A woman tutors a difficult student.

[LABEL] **neutral** [PRED] **neutral** [COEFF] 16.6853

[P] A man in jeans and a dark t - shirt is working on a train with an oil pot.

[H] A man working to fix a oil leak.

[LABEL] **neutral** [PRED] **neutral** [COEFF] 16.6445

[P] A man with dreadlocks, strolling along a street side cafe while strumming a guitar

[H] A man walks an plays the guitar badly.

[LABEL] **entailment** [PRED] **entailment** [COEFF] 16.5245

[P] A man wearing a white shirt and blue jeans is sweeping water on the street, with a red broom.

[H] The street is wet.

[LABEL] **contradiction** [PRED] **neutral** [COEFF] 15.9861

[P] Several people, some with umbrellas, milling about on an urban street near a white building with a mailbox and newspaper boxes in front of it, and a street sign that says " park ave ".

[H] A mailbox and newspaper boxes are being vandalized by hooligans.

[LABEL] **neutral** [PRED] **neutral** [COEFF] 15.9391

[P] A man in a plaid shirt is hiding his face as his arms are being held behind him by a man in a black shirt.

[H] A man is being arrested.

[LABEL] **neutral** [PRED] **entailment** [COEFF] 15.7097

[P] This person is laying on the floor at the bottom of the stairs and is missing a shoe.

[H] Someone fell down the stairs.

### 1.431 Component 430

[LABEL] **contradiction** [PRED] **contradiction** [COEFF] 4.8729

[P] A few women and children are on a sidewalk.

[H] People are sitting in the mud.

[LABEL] **contradiction** [PRED] **contradiction** [COEFF] 4.0822

[P] Four men, wearing business clothes, stood at the green tent food stand located on the bricked walkway.

[H] The men are sitting on the ground.

[LABEL] **contradiction** [PRED] **contradiction** [COEFF] 3.8218

[P] A cute baby takes a bath in a large clear bowl.

[H] The baby is playing in the dirt.

[LABEL] **contradiction** [PRED] **contradiction** [COEFF] 3.7821

[P] A woman is walking down the street with a broken umbrella and her shopping bag on her arm.  
[H] The woman is buried in the sand.

[LABEL] contradiction [PRED] contradiction [COEFF] 3.5410  
[P] A man in a black robe is walking into a old building.  
[H] The man is sleeping on sidewalk.

[LABEL] contradiction [PRED] contradiction [COEFF] 3.2973  
[P] Two men are sitting by themselves in a cafe.  
[H] Two men are sitting on a steel bench in a crowded park.

[LABEL] contradiction [PRED] contradiction [COEFF] 3.2717  
[P] A small baby sitting in a car behind the steering wheel  
[H] A baby plays on the floor.

[LABEL] contradiction [PRED] contradiction [COEFF] 2.9574  
[P] Two men are walking along side the ocean carrying a fishing pole.  
[H] They are fingerpainting on the wall

[LABEL] contradiction [PRED] contradiction [COEFF] 2.9468  
[P] Two men, both wearing bright yellow vests and jeans, are working on a roof.  
[H] The men are sitting on the ground.

[LABEL] contradiction [PRED] contradiction [COEFF] 2.9413  
[P] A child wearing a costume rides a bike in winter.  
[H] A child is sitting on the ground.

[LABEL] contradiction [PRED] contradiction [COEFF] 2.8425  
[P] A bicyclist riding in the mountains.  
[H] The bicyclist is pedaling over sand.

[LABEL] contradiction [PRED] contradiction [COEFF] 2.8148  
[P] A child is given a bath by the sink.  
[H] The child is sleeping in the crib.

[LABEL] contradiction [PRED] contradiction [COEFF] 2.7695  
[P] A boy trying to climb a wall.  
[H] The boy is sitting down tying his shoes.

[LABEL] contradiction [PRED] contradiction [COEFF] 2.7304  
[P] A woman in sunglasses taking a photograph  
[H] The woman is laying down.

[LABEL] contradiction [PRED] contradiction [COEFF] 2.7284  
[P] A black and white dog jumping into a pool with a lot of tennis balls in it.  
[H] The dogs are resting on the ground.

[LABEL] contradiction [PRED] contradiction [COEFF] 2.7148

[P] A woman dressed all in white with a white hat is standing behind a tennis net wielding a blue tennis racket.

[H] The woman is laying on the ground.

### 1.432 Component 431

[LABEL] entailment [PRED] entailment [COEFF] 17.8673

[P] Two boys in an intense wrestling match.

[H] Two boys are wrestling.

[LABEL] entailment [PRED] entailment [COEFF] 16.2905

[P] Two women in basketball uniforms playing basketball on a court.

[H] Two women are playing basketball.

[LABEL] entailment [PRED] entailment [COEFF] 15.5422

[P] Two females from different teams playing basketball.

[H] Two woman play basketball.

[LABEL] entailment [PRED] entailment [COEFF] 15.3521

[P] Three women, one in yellow and purple and two in black and white, are playing rugby.

[H] Three women are playing rugby.

[LABEL] entailment [PRED] entailment [COEFF] 14.3788

[P] Two guys, one in a maroon sweater, the other in a light blue, are shirt sitting around playing video games.

[H] Two guys are playing video games.

[LABEL] entailment [PRED] entailment [COEFF] 14.3260

[P] Two men, one wearing a white shirt and one wearing a navy blue shirt, are about to play soccer.

[H] Two men are about to play soccer.

[LABEL] entailment [PRED] entailment [COEFF] 14.1699

[P] Two children play in the melting slush.

[H] Two children are playing.

[LABEL] entailment [PRED] entailment [COEFF] 14.1684

[P] The three men are playing cricket.

[H] Three men play cricket

[LABEL] entailment [PRED] entailment [COEFF] 14.0402

[P] Two men running in a race.

[H] Two men are running.

[LABEL] entailment [PRED] entailment [COEFF] 13.6431

[P] Two women wearing dresses white drinking tea.

[H] Two women are drinking tea.

[LABEL] **entailment** [PRED] **entailment** [COEFF] 13.6271

[P] Two soccer player on a green field play with a soccer ball.

[H] Two players are playing soccer.

[LABEL] **entailment** [PRED] **entailment** [COEFF] 13.2196

[P] Four young football players in mid play.

[H] Four young people are playing football.

[LABEL] **entailment** [PRED] **entailment** [COEFF] 12.6023

[P] Two children, one in a hoodie and one in a striped shirt, look at toys.

[H] Two kids look at toys.

[LABEL] **entailment** [PRED] **entailment** [COEFF] 11.1768

[P] Two people ride bike in countryside.

[H] Two people are on bikes.

[LABEL] **entailment** [PRED] **entailment** [COEFF] 11.1633

[P] These two ladies are working in the fields.

[H] Two women do field work.

[LABEL] **entailment** [PRED] **entailment** [COEFF] 11.0114

[P] Two professional basketball players, trying to take control of the ball.

[H] Two professionals are playing basketball.

### 1.433 Component 432

[LABEL] **entailment** [PRED] **entailment** [COEFF] 10.3024

[P] A group of people are standing by a window watching something.

[H] People standing by a window

[LABEL] **entailment** [PRED] **entailment** [COEFF] 10.1582

[P] A group of people enjoying a thrill ride at an amusement park.

[H] People at the amusement park

[LABEL] **entailment** [PRED] **entailment** [COEFF] 8.8562

[P] The people are standing around at the auto show.

[H] There are people at the auto show.

[LABEL] **entailment** [PRED] **entailment** [COEFF] 8.5512

[P] People outside near a multiple vendor booths.

[H] People outside near vendor booths.

[LABEL] **entailment** [PRED] **entailment** [COEFF] 8.1652

[P] Two women are pulling suitcases along a wide sidewalk.

[H] Women pulling suitcases on a sidewalk.

[LABEL] entailment [PRED] entailment [COEFF] 8.1338

[P] People are gathered by the side of a river near some booths.

[H] People are near the river.

[LABEL] entailment [PRED] entailment [COEFF] 8.1327

[P] A crowd of people walking under a bridge.

[H] People under bridge

[LABEL] entailment [PRED] entailment [COEFF] 7.9815

[P] Several people standing at a stoplight waiting to cross the street.

[H] People wait to cross the street.

[LABEL] entailment [PRED] entailment [COEFF] 7.8126

[P] Many people are walking in the street carrying tote bags with them.

[H] People walking with their bags.

[LABEL] entailment [PRED] entailment [COEFF] 7.5051

[P] A group of people dressed in black watching as one person is performing.

[H] People watching someone perform

[LABEL] entailment [PRED] entailment [COEFF] 7.3626

[P] Two smiling little girls playing in a fountain with other people.

[H] People playing in a fountain.

[LABEL] entailment [PRED] entailment [COEFF] 7.3127

[P] A group of people standing near a predictions machine.

[H] People are standing near the prediction machine

[LABEL] entailment [PRED] entailment [COEFF] 7.1768

[P] People stand on a sidewalk outside of retail stores.

[H] People were standing outside of a retail store

[LABEL] entailment [PRED] entailment [COEFF] 7.1008

[P] Many people are gathered around the street watching two street performers.

[H] Many people are watching street performers

[LABEL] entailment [PRED] entailment [COEFF] 6.9179

[P] A person is shaking hands with people in front of them.

[H] People shake hands

[LABEL] entailment [PRED] entailment [COEFF] 6.7048

[P] A crowd of people are waiting in line.

[H] People waiting in line

### 1.434 Component 433

[LABEL] **contradiction** [PRED] **contradiction** [COEFF] 33.6211

[P] A man is staring intently at some plants.

[H] A man reads a book.

[LABEL] **contradiction** [PRED] **contradiction** [COEFF] 32.5343

[P] A young girl filling a bottle with liquid using a funnel and pitcher.

[H] A girl is reading a book.

[LABEL] **contradiction** [PRED] **contradiction** [COEFF] 28.2652

[P] A smiling child wearing a pink shirt and goggles jumps into a swimming pool.

[H] The child was reading a book.

[LABEL] **contradiction** [PRED] **contradiction** [COEFF] 26.4359

[P] A street musician plays drums at night.

[H] Someone is reading a book.

[LABEL] **contradiction** [PRED] **contradiction** [COEFF] 25.9678

[P] A man sprinkles seasonings on his barbecue in front of foliage.

[H] A man is reading a book in his kitchen.

[LABEL] **contradiction** [PRED] **contradiction** [COEFF] 25.4427

[P] A woman in a peach dress with red wristbands is singing into a microphone on a stage.

[H] A woman is reading a book.

[LABEL] **contradiction** [PRED] **contradiction** [COEFF] 25.1844

[P] A bunch of guys watching something on a computer screen.

[H] The guys are reading a book in the room.

[LABEL] **contradiction** [PRED] **contradiction** [COEFF] 24.1119

[P] A large crowd watches as three men stand in a ring with a raging bull.

[H] A man is reading a book.

[LABEL] **contradiction** [PRED] **contradiction** [COEFF] 23.7787

[P] A woman is making a phone call when she is shipping.

[H] A woman is reading a book.

[LABEL] **contradiction** [PRED] **contradiction** [COEFF] 23.3240

[P] The fuzzy photo shows a male singer at a mike, with instruments arranged in the background.

[H] A female is reading a book.

[LABEL] **contradiction** [PRED] **contradiction** [COEFF] 23.1977

[P] Woman wearing all red and a redhead garment with a microphone making a scary face and a claw with her hand.

[H] A woman is reading a book.

[LABEL] **neutral** [PRED] **contradiction** [COEFF] 23.1529

[P] A woman in a dress with sunglasses resting on her head.

[H] The woman has a book in her hand.

[LABEL] **contradiction** [PRED] **contradiction** [COEFF] 20.9617

[P] A little girl wearing sandals and white clothes holds up a small wooden cage hanging by a string.

[H] The little girl is holding a book.

[LABEL] **contradiction** [PRED] **contradiction** [COEFF] 19.9806

[P] A girl who is surrounded by other people is taking a picture at a concert.

[H] A girl is sitting down reading a book next to a lake

[LABEL] **contradiction** [PRED] **contradiction** [COEFF] 18.5907

[P] A man wearing a doo - rag with long hair stares right in the camera.

[H] A man is reading a book.

[LABEL] **contradiction** [PRED] **contradiction** [COEFF] 17.9061

[P] Child in a striped shirt is swinging from a rope swing.

[H] A child is reading a book in bed.

### 1.435 Component 434

[LABEL] **contradiction** [PRED] **contradiction** [COEFF] 15.8497

[P] Two young women sit by a fountain.

[H] There is one person

[LABEL] **contradiction** [PRED] **contradiction** [COEFF] 14.7345

[P] A crowd gathered around a park water fountain in the rain.

[H] One person is at the park.

[LABEL] **contradiction** [PRED] **contradiction** [COEFF] 14.7022

[P] Four friends are participating in a parade.

[H] One person sits

[LABEL] **contradiction** [PRED] **contradiction** [COEFF] 14.5447

[P] A group of people riding bicycles turn on a street.

[H] A single cyclist quietly rides in the country.

[LABEL] **contradiction** [PRED] **contradiction** [COEFF] 14.1226

[P] Three kids playing in the water with some cattle.

[H] One child tips cows in the desert.

[LABEL] **contradiction** [PRED] **contradiction** [COEFF] 13.6636

[P] 5 firetrucks line the street, ready for potential problems.

[H] A single firetruck on a lawn.

[LABEL] **contradiction** [PRED] **contradiction** [COEFF] 13.2556

[P] A group of skiers shown on a snow covered mountain.

[H] There is one skier in the competition.

[LABEL] **contradiction** [PRED] **contradiction** [COEFF] 13.0978

[P] Two women are embracing in a rather lurid scene and are seen laughing and having fun.

[H] One woman is alone in a rather lurid scene.

[LABEL] **contradiction** [PRED] **contradiction** [COEFF] 13.0295

[P] Four people walking toward a large construction tower of some kind in a lightly wooded area.

[H] One man walking in the direction of the woods.

[LABEL] **contradiction** [PRED] **contradiction** [COEFF] 12.9160

[P] Three older people stand in front of an avrovulcan. com sign.

[H] One person sleeps.

[LABEL] **contradiction** [PRED] **contradiction** [COEFF] 12.6902

[P] A crowd of people are standing around on a sidewalk.

[H] One person stands on the sidewalk.

[LABEL] **contradiction** [PRED] **contradiction** [COEFF] 12.6312

[P] Several people at an outdoor picnic.

[H] A single man eats alone.

[LABEL] **contradiction** [PRED] **contradiction** [COEFF] 12.6170

[P] Confetti is in the air among a huge crowd of people at some kind of celebration.

[H] One person sits alone and is sad.

[LABEL] **contradiction** [PRED] **contradiction** [COEFF] 12.5762

[P] Two coffee shop employees are making coffee drinks.

[H] One employee makes drinks.

[LABEL] **contradiction** [PRED] **contradiction** [COEFF] 12.5752

[P] A group of musical performers are playing and a crowd of people is around them.

[H] One musician stands alone as people pass by.

[LABEL] **contradiction** [PRED] **contradiction** [COEFF] 12.5489

[P] A group of men, women and children.

[H] One guy standing in a field

## 1.436 Component 435

[LABEL] **contradiction** [PRED] **contradiction** [COEFF] 27.8017

[P] A group of people are walking in front of a large stone building.

[H] The people are riding bikes.

[LABEL] **contradiction** [PRED] **neutral** [COEFF] 27.0206



[P] Two men standing on a tree near a large body of water.

[H] The men are swimming in the water now.

[LABEL] **contradiction** [PRED] **contradiction** [COEFF] 24.2131

[P] A group of people are sitting on the top of a boat.

[H] The people are swimming

[LABEL] **neutral** [PRED] **contradiction** [COEFF] 22.3093

[P] A tan dog walks through a field of colorful flowers.

[H] The tan dog is running after a ball.

[LABEL] **contradiction** [PRED] **contradiction** [COEFF] 20.8883

[P] Three females are walking along the street, one of which is walking a medium sized, black dog.

[H] The women are playing on the bumper cars.

[LABEL] **neutral** [PRED] **neutral** [COEFF] 20.7536

[P] A black dog walking beside a pool.

[H] The black dog is going to jump in the pool.

[LABEL] **contradiction** [PRED] **contradiction** [COEFF] 20.1492

[P] Two children walking up an enormous staircase.

[H] The children are sleeping.

[LABEL] **contradiction** [PRED] **contradiction** [COEFF] 19.9562

[P] Two ladies sitting on a city bus bench.

[H] They are walking.

[LABEL] **neutral** [PRED] **contradiction** [COEFF] 19.2536

[P] Blond, smiling boy in a denim coat, sitting in a tree.

[H] The boy is climbing up to a treehouse.

[LABEL] **contradiction** [PRED] **contradiction** [COEFF] 19.1805

[P] Several women are walking down a city street.

[H] The women are riding unicycles.

[LABEL] **contradiction** [PRED] **contradiction** [COEFF] 18.3616

[P] Three people walk on grass adjacent to a river.

[H] The people wade through the river.

[LABEL] **neutral** [PRED] **contradiction** [COEFF] 17.5389

[P] A man on a bike and a man is walking in front of a bus with a 'sex and the city' ad.

[H] The man just got off the bus and is going home.

[LABEL] **entailment** [PRED] **neutral** [COEFF] 17.2917

[P] A young girl playing in the water with others watching in the background.

[H] The girl is wet.

[LABEL] **contradiction** [PRED] **contradiction** [COEFF] 17.2322

[P] A boy laying on a rock in the middle of a calm stream.

[H] The boy is jumping

[LABEL] **neutral** [PRED] **neutral** [COEFF] 17.2247

[P] A man with a leashed dog is standing near a pagoda - like gazebo.

[H] The man is walking his dog.

[LABEL] **entailment** [PRED] **neutral** [COEFF] 16.8214

[P] A man sits at a table in front of a large mural.

[H] There is a person in crowd who is constantly looking at the large mural

### 1.437 Component 436

[LABEL] **neutral** [PRED] **contradiction** [COEFF] 42.6884

[P] A group of men in white shirts perform in a parade.

[H] A group of friends perform in the town's yearly parade.

[LABEL] **neutral** [PRED] **neutral** [COEFF] 38.9709

[P] There's a person wearing a black shirt and is playing bowling.

[H] A group of friends are bowling.

[LABEL] **neutral** [PRED] **contradiction** [COEFF] 36.3908

[P] Three boys in hooded sweatshirts standing and looking at camera.

[H] Three young school friends pose.

[LABEL] **neutral** [PRED] **contradiction** [COEFF] 32.2129

[P] People in costume standing around a tree in a forest.

[H] A group of friends are hanging out together.

[LABEL] **entailment** [PRED] **contradiction** [COEFF] 31.0184

[P] Three people dressed in costumes pose for the camera.

[H] A group of of friends had their picture taken.

[LABEL] **neutral** [PRED] **contradiction** [COEFF] 30.5339

[P] Two men are at work in construction.

[H] Two friends are building a new house.

[LABEL] **neutral** [PRED] **neutral** [COEFF] 30.3486

[P] In a bar, two women and a man are making bunny ear gestures at the camera behind another man's head.

[H] Some friends are making funny gestures as they get their picture taken.

[LABEL] **neutral** [PRED] **neutral** [COEFF] 30.2498

[P] A group of boys play basketball outside of a brown building.

[H] The group of friends outside are playing basketball.

[LABEL] **neutral** [PRED] **neutral** [COEFF] 28.7105

[P] Two people dressed in mostly black clothing walking on a sidewalk.

[H] Two friends walking together

[LABEL] **neutral** [PRED] **neutral** [COEFF] 28.2425

[P] Two men stand together as one wearing a suit watches the other tie on a yellow tie while making a face.

[H] A couple of friends are nervous and getting ready for a special occassion.

[LABEL] **neutral** [PRED] **neutral** [COEFF] 27.9790

[P] Two woman wearing statue of liberty hats get their picture taken in a subway.

[H] Two friends are having fun wearing statue of liberty hats.

[LABEL] **neutral** [PRED] **neutral** [COEFF] 27.7728

[P] Four teenage boys are doing cannonballs into a swimming pool.

[H] Four friends are having a competition to see who throws the most water out of a pool.

[LABEL] **neutral** [PRED] **contradiction** [COEFF] 27.7351

[P] Two women with sunglasses sitting outside.

[H] Two friends sit outside.

[LABEL] **neutral** [PRED] **neutral** [COEFF] 27.3390

[P] There are two men with sunglasses, one of which is wearing a hat and a backpack.

[H] Two friends going on a hike.

[LABEL] **neutral** [PRED] **contradiction** [COEFF] 26.5830

[P] Two men walking down the street.

[H] To friends take a walk.

[LABEL] **neutral** [PRED] **contradiction** [COEFF] 25.7459

[P] Five casually dressed, dark - haired young men sit at a table in a restaurant.

[H] Five college friends sits at a table in restaurant

## 1.438 Component 437

[LABEL] **contradiction** [PRED] **contradiction** [COEFF] 10.6000

[P] A man somewhat sky dives into a blue serene pool.

[H] A man is sleeping.

[LABEL] **contradiction** [PRED] **contradiction** [COEFF] 9.6605

[P] A man is climbing on top of some metal poles attached to each other.

[H] A man is sleeping.

[LABEL] **contradiction** [PRED] **contradiction** [COEFF] 9.3448

[P] Two men with sunglasses are walking by a red wall.

[H] Two men with hats are sleeping.

[LABEL] contradiction [PRED] contradiction [COEFF] 7.8257  
[P] A dog is licking its lips while sitting beside two feeding tray.  
[H] The dog is sleeping soundly.

[LABEL] contradiction [PRED] contradiction [COEFF] 7.0066  
[P] A girl in a red sweater runs on the grass.  
[H] A girl is sleeping.

[LABEL] contradiction [PRED] contradiction [COEFF] 6.7366  
[P] A little boy throws a bowling ball down the lane.  
[H] A boy is sleeping.

[LABEL] contradiction [PRED] contradiction [COEFF] 6.6222  
[P] The wet brown dog is running in the water.  
[H] The dog is sleeping.

[LABEL] contradiction [PRED] contradiction [COEFF] 6.4915  
[P] Two men with guitars are walking away from the beach.  
[H] The men are sleeping.

[LABEL] contradiction [PRED] contradiction [COEFF] 6.3004  
[P] Six girls are sitting together laughing and playing tambourines.  
[H] A group of girls are sleeping.

[LABEL] contradiction [PRED] contradiction [COEFF] 6.2084  
[P] A girl in cargo pants and a green shirt jumps in front of a square stone.  
[H] A girl sleeping.

[LABEL] contradiction [PRED] contradiction [COEFF] 5.8906  
[P] Group of american camel riders on a dirt road smiling and having fun.  
[H] A group of people asleep.

[LABEL] contradiction [PRED] contradiction [COEFF] 5.6041  
[P] A person hanging from a parachute makes a splash as their body hits the water.  
[H] A person is sleeping on the ground.

[LABEL] contradiction [PRED] contradiction [COEFF] 5.5764  
[P] A man on a bike is riding along the side of a country road  
[H] A man is sleeping.

[LABEL] contradiction [PRED] contradiction [COEFF] 5.5672  
[P] A man reading a newspaper is leaning up against a purple wall with graffiti.  
[H] A man is sleeping.

[LABEL] contradiction [PRED] contradiction [COEFF] 5.4787  
[P] A businessman in a suit talking on his phone during a smoke break.

[H] A man is sleeping.

[LABEL] **contradiction** [PRED] **contradiction** [COEFF] 5.4296

[P] A dog wearing a jacket, pounces a toy.

[H] A dog is sleeping

## 1.439 Component 438

[LABEL] **entailment** [PRED] **entailment** [COEFF] 19.5106

[P] A dog is herding a bucking cow.

[H] A dog herds a cow.

[LABEL] **entailment** [PRED] **entailment** [COEFF] 17.5489

[P] A man is kissing the forehead of a bride.

[H] A man kisses a bride.

[LABEL] **entailment** [PRED] **entailment** [COEFF] 16.1723

[P] A cattle dog nips the leg of an animal.

[H] A dog nips the leg of an animal.

[LABEL] **entailment** [PRED] **entailment** [COEFF] 16.1660

[P] Two poodles ride in the back of a woman's convertible.

[H] Two poodles ride in a convertible.

[LABEL] **entailment** [PRED] **entailment** [COEFF] 15.6533

[P] The dog is running after the bull.

[H] The dog ran after the bull.

[LABEL] **entailment** [PRED] **entailment** [COEFF] 15.1862

[P] Girl in red shirt standing over rows of oranges.

[H] Girl in shirt standing over rows of oranges.

[LABEL] **entailment** [PRED] **entailment** [COEFF] 14.8256

[P] A man in a suit is playing bagpipes next to a young blond woman who has her abdomen exposed.

[H] A man is next a young blond woman.

[LABEL] **entailment** [PRED] **entailment** [COEFF] 14.7533

[P] A city market on a street sits in the foreground, with city buildings lay in the background.

[H] A city market sits in the foreground with city buildings in the background.

[LABEL] **entailment** [PRED] **entailment** [COEFF] 14.2142

[P] A man is sitting outside alone reading.

[H] A man is sitting outside.

[LABEL] **entailment** [PRED] **entailment** [COEFF] 14.1873

[P] A white person surrounded by green grass and trees paints on a canvas while outside.

[H] A person surrounded by green grass and trees paints on a canvas while outside.

[LABEL] **entailment** [PRED] **entailment** [COEFF] 14.0450

[P] An elderly woman looks at a bag of fruit while others look on.

[H] A woman looks at a bag of fruit.

[LABEL] **entailment** [PRED] **entailment** [COEFF] 13.4318

[P] A man sitting on a swing is painting the outside of building.

[H] A man is painting the outside of building.

[LABEL] **entailment** [PRED] **entailment** [COEFF] 13.1476

[P] An asian man in a polo shirt repairs a tennis shoe.

[H] A man repairs a shoe.

[LABEL] **neutral** [PRED] **entailment** [COEFF] 12.9720

[P] An amateur photographer or videographer and his son learning to use their new equipment.

[H] An amateur photographer or videographer and his child learning to use their new equipment.

[LABEL] **contradiction** [PRED] **entailment** [COEFF] 12.9209

[P] A man is taking pictures on his phone of stone figurines while his dog looks on.

[H] The man is taking photos of his dog.

[LABEL] **entailment** [PRED] **entailment** [COEFF] 12.8394

[P] Woman stupidly spills coffee while her jerk of a friend watches.

[H] A person watches a friend spill coffee.

## 1.440 Component 439

[LABEL] **contradiction** [PRED] **contradiction** [COEFF] 35.8444

[P] 2 people walking up a set of stairs in the city.

[H] People walking down stairs.

[LABEL] **contradiction** [PRED] **contradiction** [COEFF] 35.5425

[P] Two individuals are standing near a chalkboard.

[H] Two people are sitting near a chalkboard.

[LABEL] **contradiction** [PRED] **contradiction** [COEFF] 32.8352

[P] Two women standing outside of a bus.

[H] Two women are inside a bus.

[LABEL] **contradiction** [PRED] **contradiction** [COEFF] 30.7963

[P] A guy on a surfboard in a wetsuit surfing a big wave.

[H] A guy on a bench in a wetsuit sitting.

[LABEL] **contradiction** [PRED] **contradiction** [COEFF] 30.2580

[P] A picture of some people and a baby in a store.

[H] The people taking a picture of the baby at home

[LABEL] **contradiction** [PRED] **contradiction** [COEFF] 30.0515

[P] Two small children climbing the steps onto a plane.

[H] Two children are getting off the plane.

[LABEL] **contradiction** [PRED] **contradiction** [COEFF] 29.9068

[P] A man hitting on a girl on a metro city street at night.

[H] A girl hitting on a girl on a metro city street at night.

[LABEL] **contradiction** [PRED] **contradiction** [COEFF] 29.1321

[P] Man talking on cellphone outside of a jewelry store.

[H] A man is inside a store.

[LABEL] **contradiction** [PRED] **contradiction** [COEFF] 28.7263

[P] A man with a blue breathing mask and bandanna sitting in a chair outside a tent.

[H] A man is inside a tent.

[LABEL] **contradiction** [PRED] **contradiction** [COEFF] 28.5551

[P] A group of four young men, who appear to be students, walk away from a bus stop in a school zone.

[H] A group of four young men sit near a bus stop in a school zone.

[LABEL] **contradiction** [PRED] **contradiction** [COEFF] 28.1324

[P] Two children run in front of a large statue of a dinosaur in the forest.

[H] Two dinosaurs run in front of a small statue of a child.

[LABEL] **contradiction** [PRED] **contradiction** [COEFF] 27.3880

[P] A rock climber is descending off a large rock

[H] A climber moves onto a large rock

[LABEL] **entailment** [PRED] **contradiction** [COEFF] 27.3730

[P] A woman putting together a rug.

[H] A woman puts down the rug.

[LABEL] **contradiction** [PRED] **contradiction** [COEFF] 26.7470

[P] A young child in baggy blue pants is running away from the fire in the background.

[H] A child is running toward a fire.

[LABEL] **contradiction** [PRED] **contradiction** [COEFF] 26.4773

[P] A small girl is going up outside steps wearing a red dress, and there are bicycles on the other side of the railing.

[H] A girl is going down steps.

[LABEL] **contradiction** [PRED] **contradiction** [COEFF] 26.4068

[P] Young child sucking his finger while sitting in his stroller.

[H] Young child sucking picking his nose.

## 1.441 Component 440

[LABEL] contradiction [PRED] contradiction [COEFF] 24.9662

[P] Many girls running during a crosscountry racing event with a lot of onlookers.

[H] Some men are walking while being watched.

[LABEL] contradiction [PRED] contradiction [COEFF] 24.9255

[P] Four women in bikinis are jumping into a lake together.

[H] Some girls are playing chess.

[LABEL] contradiction [PRED] contradiction [COEFF] 22.7586

[P] Three men are working on a welding job.

[H] Some men are playing poker.

[LABEL] contradiction [PRED] contradiction [COEFF] 22.4310

[P] Men and women shoppers selecting fruit at a marketplace, while the shop keeper in white watches.

[H] Some people are selecting meat to buy.

[LABEL] contradiction [PRED] contradiction [COEFF] 22.0800

[P] A crowded day with many skiers and snowboarders on the slopes.

[H] Some people are in a plane flying over the ocean.

[LABEL] contradiction [PRED] contradiction [COEFF] 21.8576

[P] Two men and a woman are walking towards the street with a white plastic bag.

[H] Some people are sitting down and reading.

[LABEL] contradiction [PRED] contradiction [COEFF] 21.3634

[P] People dressed in white, red and green, cheering and having a good time at a street fair.

[H] Some people are mourning.

[LABEL] contradiction [PRED] contradiction [COEFF] 21.0998

[P] A young boy weating blue shorts and cleats holding a football running from other boys.

[H] Some boys are playing basketball.

[LABEL] contradiction [PRED] contradiction [COEFF] 19.7274

[P] A man jumping and hitting a soccer ball with his head in the middle of a group of men playing soccer some in yellow shirts some in gray.

[H] Some men are playing basketball.

[LABEL] contradiction [PRED] contradiction [COEFF] 18.6050

[P] A group of people hanging out on the street as a woman looks at her phone.

[H] Some people are hanging out inside a restaurant.

[LABEL] contradiction [PRED] contradiction [COEFF] 18.3967

[P] Women are on business selling vegetables.

[H] Some women are selling their souls.

[LABEL] contradiction [PRED] contradiction [COEFF] 18.3966



[P] Two african children with faced painted in orange are posing for a picture in front of a hut.  
[H] Some kids are inside reading a book.

[LABEL] **contradiction** [PRED] **contradiction** [COEFF] 18.0715

[P] Three men stand on a mountain looking at another.  
[H] Some women going swimming.

[LABEL] **contradiction** [PRED] **contradiction** [COEFF] 17.2627

[P] Five men sitting on a picnic table before attending their graduation ceremony.  
[H] Some men are watching cinema in theatre

[LABEL] **contradiction** [PRED] **contradiction** [COEFF] 16.5514

[P] Pedestrians walk on a sidewalk next to a grassy, wooded field.  
[H] Some people are running on a trail.

[LABEL] **contradiction** [PRED] **contradiction** [COEFF] 15.8592

[P] People seated on a public transportation vehicle of some kind.  
[H] Some peoples are playing cricket in ground

## 1.442 Component 441

[LABEL] **entailment** [PRED] **entailment** [COEFF] 10.0139

[P] Five dogs pull a man on a sled through the snow.  
[H] Animals and a man are outside.

[LABEL] **entailment** [PRED] **entailment** [COEFF] 9.9321

[P] A mountaineer in a red parka digs his two ice axes and crampons into a frozen wall of ice.  
[H] A man is climbing an ice mountain.

[LABEL] **entailment** [PRED] **entailment** [COEFF] 9.6463

[P] Solitary man in blue shirt driving red semi - truck of khera transport corp.  
[H] A male has clothes on is inside a vehicle.

[LABEL] **entailment** [PRED] **entailment** [COEFF] 9.4204

[P] A woman wearing a white sun visor, blue sleeveless top and white see through pants munching on food in a crowded area.  
[H] A woman wearing summer clothes is eating amongsts many people.

[LABEL] **entailment** [PRED] **entailment** [COEFF] 9.1303

[P] Older fisherman is rowing a green boat standing up down a calm river.  
[H] The man is on a boat.

[LABEL] **entailment** [PRED] **entailment** [COEFF] 9.1279

[P] A child views the world from their upstairs balcony.  
[H] A child is observing the world from up high.

[LABEL] entailment [PRED] entailment [COEFF] 9.0635

[P] A man fills up his vehicle with gas.

[H] A guy is fueling his vehicle.

[LABEL] entailment [PRED] entailment [COEFF] 8.7268

[P] A group of people and a dog sit in the bleachers of a basketball court, watching another group of people's performance on the court.

[H] The people with an animal are watching a game.

[LABEL] entailment [PRED] entailment [COEFF] 8.6498

[P] Child sitting down looking at train ride brochure

[H] A child reads at a train station.

[LABEL] entailment [PRED] entailment [COEFF] 8.6224

[P] A man in a black shirt and jeans is in midair above a messy bed.

[H] A clothed person is in a room with furniture.

[LABEL] entailment [PRED] entailment [COEFF] 8.4867

[P] A little girl in a yellow sweater appears to be scared.

[H] Little girl looking scared

[LABEL] entailment [PRED] entailment [COEFF] 8.4798

[P] A man jumping on a skiing board.

[H] A man is riding a board.

[LABEL] entailment [PRED] entailment [COEFF] 8.3333

[P] The man is waterskiing.

[H] The person is gliding along the surface of the water.

[LABEL] neutral [PRED] entailment [COEFF] 8.2680

[P] Five men dressed in tuxedos standing on a set of stairs

[H] They are dressed up

[LABEL] entailment [PRED] entailment [COEFF] 8.1982

[P] A man holds a basketball while he leaps through the air to put the ball in the hoop while many people watch from the stands.

[H] A male is playing basketball in front of people.

[LABEL] contradiction [PRED] entailment [COEFF] 8.1905

[P] A woman runs after making a hit in women's softball, the catcher rises to her feet.

[H] The woman has just struck out.

### 1.443 Component 442

[LABEL] contradiction [PRED] contradiction [COEFF] 3.6459

[P] Girl running through the water near the shore.

[H] The girl is laying in bed.

[LABEL] contradiction [PRED] contradiction [COEFF] 2.9482

[P] A dog is running through a park

[H] The dog is laying in the bed.

[LABEL] contradiction [PRED] contradiction [COEFF] 2.7848

[P] Two men rowing in the middle of a body of water.

[H] Two men eating pizza

[LABEL] contradiction [PRED] contradiction [COEFF] 2.7111

[P] White man in a black suit is crossing a busy street.

[H] A man is sitting on a couch.

[LABEL] contradiction [PRED] contradiction [COEFF] 2.6006

[P] A dog with red collar is running in the field.

[H] A dog is sleeping in a bed

[LABEL] contradiction [PRED] contradiction [COEFF] 2.5362

[P] A man standing in a wooded area.

[H] The man is in a subway station

[LABEL] contradiction [PRED] contradiction [COEFF] 2.5029

[P] Five people in the water.

[H] Five people are inside a restaurant.

[LABEL] contradiction [PRED] contradiction [COEFF] 2.4192

[P] A woman on stage lit from behind standing in front of a microphone wearing a gray top and black pants with a red, white, and blue flag wrapped part way around the lower half of her body

[H] A woman is laying on her couch

[LABEL] contradiction [PRED] contradiction [COEFF] 2.4024

[P] A woman in black walking along a waterway.

[H] A woman is window shopping downtown.

[LABEL] contradiction [PRED] contradiction [COEFF] 2.3504

[P] A woman waiting on a sidewalk for something.

[H] The woman is sitting in the living room.

[LABEL] contradiction [PRED] contradiction [COEFF] 2.3402

[P] A woman in a blue jacket is walking along a road.

[H] A woman is dancing at a club.

[LABEL] contradiction [PRED] contradiction [COEFF] 2.3218

[P] A woman holding a yellow umbrella in the rain.

[H] A woman is eating soup in a restaurant.

[LABEL] contradiction [PRED] contradiction [COEFF] 2.2933

[P] People mountain climbing.  
[H] The people were taking a bath.

[LABEL] **contradiction** [PRED] **contradiction** [COEFF] 2.2845  
[P] Two men in black are running through a forest.  
[H] The men are sitting down.

[LABEL] **contradiction** [PRED] **contradiction** [COEFF] 2.2676  
[P] A shirtless man is climbing up a mountainside.  
[H] A man wearing a shirt sits in a chair.

[LABEL] **contradiction** [PRED] **contradiction** [COEFF] 2.2520  
[P] A woman and her two dogs are walking down the street.  
[H] A female is sitting in her bed.

### 1.444 Component 443

[LABEL] **contradiction** [PRED] **contradiction** [COEFF] 9.0815  
[P] A man is pretending to be a judge.  
[H] The man is asleep.

[LABEL] **contradiction** [PRED] **contradiction** [COEFF] 8.7918  
[P] A woman in a white tennis outfit playing tennis.  
[H] The lady in whit is running away

[LABEL] **contradiction** [PRED] **contradiction** [COEFF] 7.7062  
[P] In an outdoor location with spectators in the background, a young man in a karate uniform with a blue belt has his arm around the neck of a young woman in a karate uniform with a brown belt while she grips his arm with both hands.  
[H] The young man is dancing in a closet.

[LABEL] **contradiction** [PRED] **contradiction** [COEFF] 7.4595  
[P] People are engaged in a public pillow fight.  
[H] People are walking along the beach.

[LABEL] **contradiction** [PRED] **contradiction** [COEFF] 7.2276  
[P] A man in black clothing plays a trumpet.  
[H] A man in blue clothes is playing piano.

[LABEL] **contradiction** [PRED] **contradiction** [COEFF] 6.6810  
[P] A young woman works behind the counter at a juice bar.  
[H] The woman is holding a sledgehammer while working on the street.

[LABEL] **neutral** [PRED] **contradiction** [COEFF] 6.6596  
[P] A large crowd of people watch the stage as an outside concert takes place.  
[H] The crowd is sitting in the grass

[LABEL] **contradiction** [PRED] **contradiction** [COEFF] 6.6240  
[P] An elderly couple is walking in between a large row of american flags.  
[H] The elderly couple is in ireland.

[LABEL] **contradiction** [PRED] **contradiction** [COEFF] 6.4297  
[P] A lady is singing a song on the mic.  
[H] A lady is sleep.

[LABEL] **contradiction** [PRED] **contradiction** [COEFF] 6.4201  
[P] A mother and nurse pose with a newly - born infant.  
[H] The mother is eating pizza.

[LABEL] **contradiction** [PRED] **contradiction** [COEFF] 6.1835  
[P] An hispanic man sitting on a stoop.  
[H] A man is standing in his bedroom.

[LABEL] **contradiction** [PRED] **contradiction** [COEFF] 6.1243  
[P] Two people with hiking gear at a checkpoint on a mountain.  
[H] The two people are sleeping in the sand.

[LABEL] **contradiction** [PRED] **contradiction** [COEFF] 6.0229  
[P] A group of people running for charity.  
[H] An empty park in winter.

[LABEL] **contradiction** [PRED] **contradiction** [COEFF] 5.9988  
[P] A man holding a baby in water.  
[H] A man is sleep.

[LABEL] **contradiction** [PRED] **contradiction** [COEFF] 5.8316  
[P] Two children in swimsuits are hugging each other  
[H] The two children are ignoring each other.

[LABEL] **contradiction** [PRED] **contradiction** [COEFF] 5.7982  
[P] A black man is standing on the city sidewalk by the mailbox.  
[H] The white man by the mailbox.

## 1.445 Component 444

[LABEL] **entailment** [PRED] **entailment** [COEFF] 9.9939  
[P] A man is firing a handgun.  
[H] A man fires a handgun

[LABEL] **entailment** [PRED] **entailment** [COEFF] 9.5178  
[P] Two men sit around a shiny grill.  
[H] Two men sit around a grill

[LABEL] entailment [PRED] entailment [COEFF] 9.4610  
[P] Two kids in swimsuits are digging a very deep hole on the beach.  
[H] Two kids digging hole on the beach

[LABEL] entailment [PRED] entailment [COEFF] 8.7570  
[P] A lady in a black dress sitting in a waterfall.  
[H] A lady sitting in a waterfall

[LABEL] entailment [PRED] entailment [COEFF] 8.6664  
[P] A group of people are in a boat on a large body of water.  
[H] A group of people are in a boat

[LABEL] entailment [PRED] entailment [COEFF] 8.6558  
[P] Two men are climbing a rock face at a waterfall.  
[H] Two men are rock climbing

[LABEL] entailment [PRED] entailment [COEFF] 8.5753  
[P] A man is driving a piece of heavy machinery, laying tar on a road.  
[H] A man is driving machinery

[LABEL] entailment [PRED] entailment [COEFF] 8.5384  
[P] A man is on a wire connected to a tower.  
[H] The man is on a wire

[LABEL] entailment [PRED] entailment [COEFF] 8.5354  
[P] The three men are playing cricket.  
[H] Three men play cricket

[LABEL] entailment [PRED] entailment [COEFF] 8.4426  
[P] A climber on some rocks.  
[H] A climber climbs on some rocks

[LABEL] entailment [PRED] entailment [COEFF] 8.3545  
[P] A beautiful young woman in a " fuax " scottish outfit is walking along side the road.  
[H] A beautiful woman walks along the side of a road

[LABEL] entailment [PRED] entailment [COEFF] 8.3526  
[P] Several people are walking through a lush garden.  
[H] People are walking through a garden

[LABEL] neutral [PRED] entailment [COEFF] 8.2682  
[P] A young boy wearing mickey mouse clothes in a jungle gym.  
[H] A boy is in a jungle gym

[LABEL] entailment [PRED] entailment [COEFF] 8.1114  
[P] A man sitting in a wooden boat.

[H] A man is sitting in a boat

[LABEL] **entailment** [PRED] **entailment** [COEFF] 8.0296

[P] A person with a backpack and walking stick, walking towards the mountains in the valley below.

[H] A person walks towards the mountains

[LABEL] **entailment** [PRED] **entailment** [COEFF] 7.9566

[P] A woman is riding a bicycle in her underwear with " no oil " painted on her chest.

[H] A woman rides a bike

## 1.446 Component 445

[LABEL] **neutral** [PRED] **neutral** [COEFF] 22.3906

[P] A man with black hair is cutting fish.

[H] A black haired man cutting fish to do cooking.

[LABEL] **neutral** [PRED] **neutral** [COEFF] 21.7583

[P] Seagulls fly in the sky over the water where a boat sails past rocks.

[H] Seagulls are flying around looking for food.

[LABEL] **neutral** [PRED] **neutral** [COEFF] 19.7494

[P] A man playing an accordion rides the new york city subway.

[H] A man is playing an accordion while riding the subway to pass the time.

[LABEL] **neutral** [PRED] **neutral** [COEFF] 19.7461

[P] A dog swimming though water holding a stick.

[H] A dog is swimming while holding onto a stick in his mouth to bring it back to its owner.

[LABEL] **neutral** [PRED] **neutral** [COEFF] 19.4144

[P] A man carrying a white sweatshirt, waits to cross the street.

[H] A man carrying a white sweatshirt, waits to cross the street but is waiting for the light to change.

[LABEL] **neutral** [PRED] **neutral** [COEFF] 19.1284

[P] A lady wearing jeans and a tank top and carrying an umbrella is riding her bicycle across a street.

[H] The lady is carrying an umbrella to shade herself from the sun.

[LABEL] **neutral** [PRED] **neutral** [COEFF] 19.0986

[P] A young woman working hard.

[H] A young woman working to advance at her job.

[LABEL] **neutral** [PRED] **neutral** [COEFF] 18.9899

[P] Two guys in a locker room, the guy in the orange shirt laughing.

[H] There are two guys in a locker room, one laughing at a joke the other told.

[LABEL] **neutral** [PRED] **neutral** [COEFF] 18.8207

[P] There is a large crowd of people in the street near a tgi fridays.

[H] There is a large crowd of people holding signs in the street near a tgi fridays.

[LABEL] **neutral** [PRED] **neutral** [COEFF] 18.5101

[P] Two men are talking with each other around the corner of a cemented type of building.

[H] Two men are talking to each other in the corner of a building about the project they are working on.

[LABEL] **neutral** [PRED] **neutral** [COEFF] 18.3578

[P] At least 4 people swim in shallow water that grows deeps towards a bridge.

[H] At least four inmate are trying to swim in the shallows to avoid being caught.

[LABEL] **neutral** [PRED] **neutral** [COEFF] 18.1549

[P] A man in a rural area using farm - like equipment in a swampy environment.

[H] A man using farm equipment to drain water from his crops in a swampy environment.

[LABEL] **neutral** [PRED] **neutral** [COEFF] 18.0747

[P] An older woman standing in tribal clothing.

[H] A woman in tribal clothing performing a ritual

[LABEL] **neutral** [PRED] **neutral** [COEFF] 17.8871

[P] A woman sitting on a chair with her feet in the water.

[H] The woman has her feet in water to cool them off.

[LABEL] **neutral** [PRED] **neutral** [COEFF] 17.7387

[P] A baby is crawling around on a sandy floor.

[H] A baby is crawling on a sandy floor about to fall.

[LABEL] **neutral** [PRED] **neutral** [COEFF] 17.3380

[P] A man in a hard hat stares at a machine of the train tracks.

[H] A man is wearing a hard hat to protect himself from objects that are falling.

## 1.447 Component 446

[LABEL] **contradiction** [PRED] **contradiction** [COEFF] 7.7249

[P] A man playing a set of yamaha drums.

[H] A man playing a trumpet.

[LABEL] **contradiction** [PRED] **contradiction** [COEFF] 6.2260

[P] A man plays a blue electric guitar in front of a microphone.

[H] The man is playing the flute.

[LABEL] **contradiction** [PRED] **contradiction** [COEFF] 5.0089

[P] A man in a black shirt displaying the text " enrolling stones " plays a keyboard.

[H] The man is playing the trumpet.

[LABEL] **contradiction** [PRED] **contradiction** [COEFF] 4.9061



[P] Kid in red shirt playing the guitar

[H] A young kid plays the trumpet.

[LABEL] contradiction [PRED] contradiction [COEFF] 4.6053

[P] A woman with a tattoo is playing the saxophone.

[H] A woman is playing the flute.

[LABEL] contradiction [PRED] contradiction [COEFF] 4.5462

[P] A man on a city sidewalk in a coat playing a brass clarinet.

[H] The man is playing the violin

[LABEL] contradiction [PRED] contradiction [COEFF] 4.4542

[P] A man in a red t - shirt and khakis plays the hand drums for a crowd of people.

[H] The man is playing the piano.

[LABEL] contradiction [PRED] contradiction [COEFF] 4.4125

[P] A man is playing a drum as a crowd of people are walking by.

[H] The man is playing a violin in front of a crowd

[LABEL] contradiction [PRED] contradiction [COEFF] 4.1715

[P] A small boy playing the piano.

[H] The boy is playing a violin.

[LABEL] contradiction [PRED] contradiction [COEFF] 3.9169

[P] Man playing on the drums.

[H] The man is playing a harp.

[LABEL] contradiction [PRED] contradiction [COEFF] 3.8477

[P] A woman in a sweater plays the harp.

[H] The woman is playing a guitar

[LABEL] contradiction [PRED] contradiction [COEFF] 3.6331

[P] A woman plays the violin.

[H] A women plays the drums.

[LABEL] contradiction [PRED] contradiction [COEFF] 3.5974

[P] A young man playing the piano.

[H] The young man is playing the guitar.

[LABEL] contradiction [PRED] contradiction [COEFF] 3.4990

[P] A man playing a guitar on stage under red light.

[H] The man is playing a bagpipe.

[LABEL] contradiction [PRED] contradiction [COEFF] 3.4326

[P] Two men rehearsing, one wearing a checker broad sweater and the other playing a orange guitar.

[H] Two men playing the trumpet rehearse.

[LABEL] contradiction [PRED] contradiction [COEFF] 3.3833

[P] A man playing the guitar for a small group of people.

[H] The man is playing drums for a group of people.

## 1.448 Component 447

[LABEL] neutral [PRED] contradiction [COEFF] 30.3306

[P] A boy in a gray and white shirt looking at his reflection.

[H] A boy is wearing black pants.

[LABEL] contradiction [PRED] contradiction [COEFF] 28.8018

[P] A large man wearing a white hat.

[H] A man is wearing a black hat.

[LABEL] contradiction [PRED] contradiction [COEFF] 26.9458

[P] A man in a white shirt is working on a rooftop.

[H] A man is in a black shirt.

[LABEL] contradiction [PRED] contradiction [COEFF] 25.6798

[P] Women dressed in white walk together outside.

[H] The women are wearing only black gowns.

[LABEL] contradiction [PRED] contradiction [COEFF] 25.2114

[P] An older man in a white shirt riding a motorcycle.

[H] The man is wearing a black shirt.

[LABEL] contradiction [PRED] contradiction [COEFF] 23.8148

[P] A woman in a white shirt is wearing goggles.

[H] A woman is wearing a black shirt and sunglasses.

[LABEL] contradiction [PRED] contradiction [COEFF] 23.2550

[P] A man on a steep incline wearing a white shirt is working on a roof, with lots of debris all around.

[H] The man has a black shirt on.

[LABEL] contradiction [PRED] contradiction [COEFF] 22.8682

[P] Three women in white hats in a line.

[H] Three women in purple hats in a line.

[LABEL] contradiction [PRED] contradiction [COEFF] 21.9073

[P] A woman in a multi - color shirt is sitting on the floor working with a white product.

[H] The woman is wearing a black shirt

[LABEL] contradiction [PRED] contradiction [COEFF] 21.8234

[P] Woman in a white shirt and blue shorts playing tennis.

[H] The woman is wearing a purple shirt.

[LABEL] **contradiction** [PRED] **contradiction** [COEFF] 21.6999  
 [P] A bride dressed in white dress with white shoes, holding a bouquet of roses, and a groom is dressed in a dark blue tuxedo ; both are standing against a blue lamp post.  
 [H] A bride dressed in black holds some flowers

[LABEL] **contradiction** [PRED] **contradiction** [COEFF] 20.9128  
 [P] A female athlete wearing white is warming up by stretching.  
 [H] A girl in black is stretching alone on the field.

[LABEL] **contradiction** [PRED] **contradiction** [COEFF] 20.6133  
 [P] A man wearing a white shirt is washing the outside window on the front of an airplane.  
 [H] The shirt is black

[LABEL] **contradiction** [PRED] **contradiction** [COEFF] 20.3336  
 [P] A older gentleman sitting on a bench near a white dog with a ball.  
 [H] A young man is playing with a black dog.

[LABEL] **contradiction** [PRED] **contradiction** [COEFF] 20.1525  
 [P] A group of people at a rodeo watching a cowboy being thrown from a white horse.  
 [H] The horse is black

[LABEL] **contradiction** [PRED] **contradiction** [COEFF] 19.9008  
 [P] Two brown dogs play in shallow water  
 [H] Two black dogs play in shallow water.

#### 1.449 Component 448

[LABEL] **entailment** [PRED] **entailment** [COEFF] 34.3284  
 [P] Two women dance together in a crowd.  
 [H] The women are dancing.

[LABEL] **entailment** [PRED] **entailment** [COEFF] 22.3934  
 [P] Two players fighting over a ball in a lacrosse match  
 [H] The players are fighting.

[LABEL] **entailment** [PRED] **entailment** [COEFF] 22.0760  
 [P] A middle - aged man reads a newspaper on a train  
 [H] The man is reading.

[LABEL] **entailment** [PRED] **entailment** [COEFF] 21.8276  
 [P] Two people sitting and talking in front of a restaurant.  
 [H] The people are talking.

[LABEL] **entailment** [PRED] **entailment** [COEFF] 21.1602  
 [P] A young man and young lady dancing on a carpeted floor with a picture from the movie toy story on a big screen in the background.

[H] The two people are dancing.

[LABEL] **entailment** [PRED] **entailment** [COEFF] 20.2761

[P] Four asian women performing a dance in traditional, oriental attire, outside a church with onlookers watching.

[H] The women are dancing.

[LABEL] **neutral** [PRED] **entailment** [COEFF] 20.1849

[P] A man and a woman who are dressed in wedding clothes are dancing on a dance floor.

[H] The people are dancing

[LABEL] **entailment** [PRED] **entailment** [COEFF] 19.4814

[P] A female fan dancer wearing a top, a skirt with beads, and carrying a fan in each hand, with a bemused expression on her face as she looks to her left, performs in front of a guitarist and a drummer.

[H] The female is dancing

[LABEL] **entailment** [PRED] **entailment** [COEFF] 17.9179

[P] A woman in black clothes cleaning columns with a green bucket and orange gloves.

[H] The woman is cleaning.

[LABEL] **entailment** [PRED] **entailment** [COEFF] 17.8283

[P] Two men wearing black shirt talking in a bar

[H] Two men are talking

[LABEL] **entailment** [PRED] **entailment** [COEFF] 17.4892

[P] A woman with a green swim cap swimming in a pool.

[H] The woman is in the water.

[LABEL] **entailment** [PRED] **entailment** [COEFF] 17.4595

[P] Guy in black shirt and jeans jumping with wood pieces in front of a building called stomp

[H] The guy is jumping

[LABEL] **entailment** [PRED] **entailment** [COEFF] 17.4365

[P] A young boy plays in a red ball pit.

[H] The boy is playing

[LABEL] **entailment** [PRED] **entailment** [COEFF] 17.2510

[P] A girl jumps into a swimming pool with a guy in black.

[H] The girl is swimming.

[LABEL] **entailment** [PRED] **entailment** [COEFF] 16.6235

[P] A man wearing a traditional indian costume demonstrates dance moves.

[H] The man is dancing.

[LABEL] **entailment** [PRED] **entailment** [COEFF] 15.7974

[P] Well dressed youth laugh about something in public.

[H] The youth are laughing.

## 1.450 Component 449

[LABEL] **contradiction** [PRED] **contradiction** [COEFF] 46.8138

[P] A man in a costume sitting on a bench.

[H] A man in a costume is standing near a bench.

[LABEL] **entailment** [PRED] **entailment** [COEFF] 38.1802

[P] A man wearing a hat and tennis shoes sits on a granite ledge next to a boy who has taken his tennis shoes off.

[H] A man is standing next to a boy.

[LABEL] **contradiction** [PRED] **entailment** [COEFF] 37.8614

[P] A resting security guard, in a blue shirt, sitting on a stool.

[H] A security guard standing on a stool.

[LABEL] **contradiction** [PRED] **contradiction** [COEFF] 37.1655

[P] A guy sitting on a stool in a light tan shirt and darker tan shorts with glasses around his neck working on a project.

[H] A guy is standing on a stool.

[LABEL] **contradiction** [PRED] **contradiction** [COEFF] 36.5977

[P] Several people are sitting at a table drinking wine.

[H] There are people standing at a table.

[LABEL] **contradiction** [PRED] **contradiction** [COEFF] 36.3796

[P] Two girls sit next to a statue.

[H] The girls are standing by a statue.

[LABEL] **contradiction** [PRED] **contradiction** [COEFF] 34.8155

[P] A man is sitting in a chair and playing the guitar.

[H] A man is standing on a chair and playing the guitar.

[LABEL] **contradiction** [PRED] **contradiction** [COEFF] 31.2438

[P] A young girl sitting on a small chair surrounded by what looks like handmade fabrics and bags.

[H] A girl stands by a chair.

[LABEL] **contradiction** [PRED] **contradiction** [COEFF] 31.1176

[P] A small girl wearing a purple jacket sitting in the grass next to a doll in a nearly identical outfit.

[H] The small girl is standing in the grass.

[LABEL] **contradiction** [PRED] **contradiction** [COEFF] 29.9762

[P] A group of african children is sitting on a field.

[H] There is a bunch of children standing around in a field.

[LABEL] **contradiction** [PRED] **entailment** [COEFF] 28.1669

[P] A man in sitting in front of a large calvin klein steel advertisement with a long instrument.

[H] A man is standing in front of an instrument ad

[LABEL] **contradiction** [PRED] **contradiction** [COEFF] 27.1865

[P] This image shows four men sitting in front on several stacks of books that bear what appear to be either chinese or japanese symbols.

[H] Four men are standing by the books.

[LABEL] **contradiction** [PRED] **contradiction** [COEFF] 26.5428

[P] Here is a picture of a man, possibly homeless, sleeping on bench near a train station.

[H] A man is standing on a bench.

[LABEL] **contradiction** [PRED] **contradiction** [COEFF] 26.0945

[P] The legs and feet of people sitting on a wooden table, two cameras and cigarettes on it.

[H] The legs of people standing on a table.

[LABEL] **contradiction** [PRED] **neutral** [COEFF] 25.5688

[P] A woman sitting at a counter is looking up.

[H] The woman is standing at the counter looking at people on the street.

[LABEL] **contradiction** [PRED] **contradiction** [COEFF] 25.4717

[P] People pose for the picture while sitting on a bed.

[H] People are standing on a bed.

## 1.451 Component 450

[LABEL] **contradiction** [PRED] **contradiction** [COEFF] 19.5936

[P] One man is jumping into the water, while the other is watching.

[H] Two girls are jumping in the water

[LABEL] **contradiction** [PRED] **contradiction** [COEFF] 16.5152

[P] A man is driving an atv type vehicle through a marked course.

[H] Two girls are driving around the streets in a bulldozer.

[LABEL] **contradiction** [PRED] **contradiction** [COEFF] 16.2418

[P] A man walking down a sidewalk while a man on the left in blue crosses the street.

[H] Two women are walking down the sidewalk.

[LABEL] **contradiction** [PRED] **contradiction** [COEFF] 14.1910

[P] A group of men are running on a beach.

[H] Little girls are running on the playground.

[LABEL] **contradiction** [PRED] **contradiction** [COEFF] 13.8314

[P] A man in a hat is sitting next to a little boy and next to a metal bucket.

[H] Two women are shopping.

[LABEL] **contradiction** [PRED] **contradiction** [COEFF] 13.5967

[P] A young boy slides on a slip'n'slide.

[H] Two girls are playing with dolls.

[LABEL] **contradiction** [PRED] **contradiction** [COEFF] 10.7268

[P] An elderly man, wearing a white hat, is sweeping a parking lot.

[H] Two women are swimming

[LABEL] **contradiction** [PRED] **contradiction** [COEFF] 10.7022

[P] Three older men, one with a yarmulke, one with glasses, and one with a striped shirt are talking.

[H] A girl getting a haircut.

[LABEL] **contradiction** [PRED] **contradiction** [COEFF] 10.6005

[P] Three men in an auditorium prepare to tape something.

[H] Two women are sleeping in the library.

[LABEL] **contradiction** [PRED] **contradiction** [COEFF] 10.5735

[P] An older man is drinking orange juice at a restaurant.

[H] Two women are at a restaurant drinking wine.

[LABEL] **contradiction** [PRED] **contradiction** [COEFF] 10.0917

[P] Three men ride horses along a ranch fence with sprawling fields behind them.

[H] Two ladies were working on their ranch.

[LABEL] **contradiction** [PRED] **contradiction** [COEFF] 9.6939

[P] A bunch of people mainly men watching something.

[H] Women sewing shoes

[LABEL] **contradiction** [PRED] **contradiction** [COEFF] 9.6402

[P] Two ladies pose in front of the red bull energy drink vehicle.

[H] Three brothers stand at a hot dog vendor's cart.

[LABEL] **contradiction** [PRED] **contradiction** [COEFF] 9.2411

[P] One man showing flash card to the man holding the microphone.

[H] Two women singing into a microphone.

[LABEL] **contradiction** [PRED] **contradiction** [COEFF] 9.2180

[P] A group of young people are boating and wearing life jackets.

[H] Five girls are reading to the elderly.

[LABEL] **contradiction** [PRED] **contradiction** [COEFF] 9.0539

[P] A woman wearing a straw hat walking and talking on the phone.

[H] Two boys in red are dancing.

## 1.452 Component 451

[LABEL] **contradiction** [PRED] **contradiction** [COEFF] 31.4523

[P] A child jumping from a slide into a pool.

[H] The pool is empty.

[LABEL] **contradiction** [PRED] **contradiction** [COEFF] 31.0584

[P] A man taking a picture of a band performing on stage.

[H] The stage is empty.

[LABEL] **contradiction** [PRED] **contradiction** [COEFF] 29.8607

[P] Groups of people are in a urban park or walking towards the main area.

[H] The park is empty.

[LABEL] **contradiction** [PRED] **contradiction** [COEFF] 28.0055

[P] Two people ride the train.

[H] The train is empty.

[LABEL] **neutral** [PRED] **contradiction** [COEFF] 27.2943

[P] A girl with blue hair is pushing a coffee cart.

[H] The coffee cart is empty.

[LABEL] **contradiction** [PRED] **contradiction** [COEFF] 25.4596

[P] People in a foyer of a shopping mall with security guards on duty.

[H] The mall is empty.

[LABEL] **contradiction** [PRED] **contradiction** [COEFF] 25.3406

[P] Two women walk around a laundry mat while a man sits at a desk and eats.

[H] The laundry mat is empty

[LABEL] **contradiction** [PRED] **contradiction** [COEFF] 23.0752

[P] People socializing on a boardwalk on a summer night.

[H] The boardwalk is eerily empty.

[LABEL] **contradiction** [PRED] **contradiction** [COEFF] 20.9129

[P] A race between friends at the park.

[H] The park is deserted.

[LABEL] **contradiction** [PRED] **contradiction** [COEFF] 20.3489

[P] Two people outside in the downtown area.

[H] The downtown area is completely empty, and abandoned.

[LABEL] **contradiction** [PRED] **contradiction** [COEFF] 19.3942

[P] A group of people are gathered at some type of outdoor event.

[H] The outdoor field was empty.

[LABEL] **contradiction** [PRED] **contradiction** [COEFF] 18.6246

[P] Fisherman on boat grabbing a net filled with what appears to be clams.

[H] The net is empty.



[LABEL] **contradiction** [PRED] **contradiction** [COEFF] 18.3185

[P] Women dj at a evening garden party taking request from a male guest.

[H] The party is empty.

[LABEL] **contradiction** [PRED] **contradiction** [COEFF] 16.9831

[P] The six people are in a blue raft in the water and one person flew out of the raft.

[H] The river basin is empty.

[LABEL] **contradiction** [PRED] **contradiction** [COEFF] 16.7744

[P] A scientist intently looks through a microscope in a laboratory.

[H] The lab is empty and no one is there.

[LABEL] **contradiction** [PRED] **contradiction** [COEFF] 16.3822

[P] A variety of folks in the back of a large wagon.

[H] The wagon is empty.

### 1.453 Component 452

[LABEL] **contradiction** [PRED] **contradiction** [COEFF] 11.1677

[P] A man in a black shirt and jeans walks beside a woman in black pants and a flowery shirt in front of a refreshment stand with others walking nearby.

[H] The couple is sitting inside of the restaurant.

[LABEL] **contradiction** [PRED] **contradiction** [COEFF] 9.2177

[P] A man stands with what appears to be a table of handbags in front of a deli in a city.

[H] A man sits on the curb by himself.

[LABEL] **contradiction** [PRED] **contradiction** [COEFF] 8.9307

[P] A fisherman drags a red net through the water close to the beach.

[H] A man stands knee deep in water with a fishing pole.

[LABEL] **contradiction** [PRED] **contradiction** [COEFF] 8.8480

[P] A young blond woman walks through a street with a black purse.

[H] A young woman sits on a the bus.

[LABEL] **contradiction** [PRED] **contradiction** [COEFF] 7.6673

[P] Workers are working and chatting in the middle of a street.

[H] The people are standing inside the building

[LABEL] **entailment** [PRED] **contradiction** [COEFF] 7.5864

[P] A group of people are waiting in a line outside of a building.

[H] The people are standing outdoors.

[LABEL] **contradiction** [PRED] **contradiction** [COEFF] 7.5735

[P] Two women carrying bags are walking down a sidewalk together.

[H] Two women sitting in the park.

[LABEL] **contradiction** [PRED] **contradiction** [COEFF] 7.5216  
[P] A man with black slacks and red shirt standing in front of a classroom with a whiteboard behind him.  
[H] The man is sitting outside.

[LABEL] **contradiction** [PRED] **contradiction** [COEFF] 7.2852  
[P] A man on a scaffold paints a wall with a paint roller.  
[H] The man is on the ground

[LABEL] **contradiction** [PRED] **contradiction** [COEFF] 7.1473  
[P] A lone old man sitting on a white chair in front of a gate.  
[H] The man is standing up in front of a car.

[LABEL] **contradiction** [PRED] **contradiction** [COEFF] 6.9743  
[P] A group of men gather on their vespas.  
[H] A group of men are sitting in trucks.

[LABEL] **contradiction** [PRED] **contradiction** [COEFF] 6.9714  
[P] A rugby player is jumping up to catching a ball, with a player in blue below him.  
[H] The rugby player is on the bench.

[LABEL] **contradiction** [PRED] **contradiction** [COEFF] 6.8777  
[P] A man with a beard who wears a black knit hat and a gray vest stands by a building.  
[H] A man is standing on his head in a kitchen.

[LABEL] **contradiction** [PRED] **contradiction** [COEFF] 6.8451  
[P] A bride takes cover under an umbrella.  
[H] A woman stands on top of a hill.

[LABEL] **contradiction** [PRED] **contradiction** [COEFF] 6.8359  
[P] A guy is casting his fishing rod on a dock.  
[H] The guy is casting his fishing rod in the middle of the lake.

[LABEL] **contradiction** [PRED] **contradiction** [COEFF] 6.7284  
[P] A woman in an orange - hooded outfit is sitting with her hand on her face.  
[H] The woman has her hands in her pocket.

### 1.454 Component 453

[LABEL] **contradiction** [PRED] **contradiction** [COEFF] 25.7084  
[P] A woman who is smiling is wearing a unique head ornament.  
[H] A woman is walking in a park.

[LABEL] **contradiction** [PRED] **contradiction** [COEFF] 25.7025  
[P] A young boy wearing a red bandanna is having his face painted with " free b... " in red letters.  
[H] The boy is watching tv.

[LABEL] **neutral** [PRED] **neutral** [COEFF] 25.2290  
[P] A boy and a girl climbing up a fake rock wall in climbing gear.  
[H] Two people are at an indoor park.

[LABEL] **contradiction** [PRED] **neutral** [COEFF] 22.7238  
[P] Two people ridding a colorfully decorated bicycle.  
[H] People go up the courthouse steps.

[LABEL] **contradiction** [PRED] **contradiction** [COEFF] 22.3999  
[P] A boy in a green striped top is running barefoot through the sand.  
[H] A boy is playing video games at home.

[LABEL] **neutral** [PRED] **neutral** [COEFF] 21.9356  
[P] People are looking a figure holding a multicolored umbrella.  
[H] They are in a shop.

[LABEL] **neutral** [PRED] **neutral** [COEFF] 21.2830  
[P] A man is jumping into an inflatable tube in a large body of water that also has boats, a ramp and a person in it.  
[H] A group of people are celebrating labor day out on the lake.

[LABEL] **contradiction** [PRED] **neutral** [COEFF] 21.2814  
[P] A woman wearing high heels and a hat.  
[H] The woman is working out at the gym.

[LABEL] **neutral** [PRED] **neutral** [COEFF] 21.0553  
[P] A smiling child slides down a slippery tube slide  
[H] A child playing at an outdoor park

[LABEL] **neutral** [PRED] **neutral** [COEFF] 20.9735  
[P] Several men dressed in cowboy boots and hats are hanging around, and one man is getting his shoes shined.  
[H] The men are out at a bar.

[LABEL] **neutral** [PRED] **neutral** [COEFF] 20.9433  
[P] Many men in purple are playing trumpets.  
[H] A small band performs in a train station.

[LABEL] **contradiction** [PRED] **neutral** [COEFF] 20.5957  
[P] A young asian man wearing a conical straw hat holding straw goods, and another person in the back to the left holding straw goods.  
[H] Two asian men are eating at a cafe.

[LABEL] **neutral** [PRED] **neutral** [COEFF] 20.2085  
[P] A woman wearing white sunglasses is holding a plastic cup.  
[H] She is at the park.

[LABEL] **contradiction** [PRED] **contradiction** [COEFF] 19.1389

[P] Man opens gift of beer bottle pillow.

[H] The man went to the mall

[LABEL] **neutral** [PRED] **neutral** [COEFF] 18.7926

[P] A person in costume is trying to fly around a red pole.

[H] A person is performing in a circus.

[LABEL] **contradiction** [PRED] **contradiction** [COEFF] 18.4507

[P] A small black dog chews on fingers.

[H] The dog is swimming in a pool.

### 1.455 Component 454

[LABEL] **entailment** [PRED] **entailment** [COEFF] 9.1879

[P] A person is riding their motorcycle and are shown as the motorcycle jumps into the air.

[H] A person is on a motorcycle.

[LABEL] **entailment** [PRED] **entailment** [COEFF] 8.4425

[P] A man is using his computer in a kitchen.

[H] A man uses his computer.

[LABEL] **entailment** [PRED] **entailment** [COEFF] 7.9971

[P] A man is riding his bicycle down the sidewalk.

[H] A man is riding a bicycle.

[LABEL] **entailment** [PRED] **entailment** [COEFF] 6.6108

[P] A group of people watches a boy on a skateboard launch off a ramp.

[H] People are watching a boy skateboard.

[LABEL] **entailment** [PRED] **entailment** [COEFF] 6.6057

[P] A woman works with cotton on a loom in an exotic setting.

[H] A woman works with cotton.

[LABEL] **entailment** [PRED] **entailment** [COEFF] 6.5805

[P] A man is doing tricks on a bike and is very high in the air.

[H] A man does tricks on a bike.

[LABEL] **entailment** [PRED] **entailment** [COEFF] 6.3605

[P] A woman raises a flag in front of a barricade and police.

[H] A woman raises a flag.

[LABEL] **neutral** [PRED] **entailment** [COEFF] 6.1025

[P] A young man is grilling hamburgers and hotdogs in a park on a sunny day.

[H] A young man is grilling.

[LABEL] entailment [PRED] entailment [COEFF] 6.0833

[P] A boy begins to ride a bike as a man holds the back of it.

[H] The boy is riding a bike.

[LABEL] entailment [PRED] entailment [COEFF] 6.0449

[P] A child on a scooter is jumping the curb.

[H] A child has a scooter.

[LABEL] entailment [PRED] entailment [COEFF] 6.0350

[P] A dragon head costume at a parade.

[H] There is a dragon head costume.

[LABEL] entailment [PRED] entailment [COEFF] 5.9190

[P] A girl riding a red bicycle in red heels and leg warmers, carrying takeout in a bag.

[H] A girl is riding a red bicycle.

[LABEL] entailment [PRED] entailment [COEFF] 5.9112

[P] A woman is making a funny face while playing a board game.

[H] A woman plays a board game.

[LABEL] entailment [PRED] entailment [COEFF] 5.8252

[P] A woman is using a ruler at a desk to mark a sheet of paper.

[H] There is a woman using a ruler.

[LABEL] entailment [PRED] entailment [COEFF] 5.7533

[P] A child is jumping on a trampoline in front of a brick wall and below colored flags.

[H] A child is jumping a trampoline.

[LABEL] entailment [PRED] entailment [COEFF] 5.5205

[P] A woman rides a bike on a dirt path.

[H] A woman is riding a bike.

## 1.456 Component 455

[LABEL] entailment [PRED] entailment [COEFF] 6.9977

[P] Children playing outside in a fountain.

[H] Children playing outside in a fountain.

[LABEL] entailment [PRED] entailment [COEFF] 6.8968

[P] A woman riding on a children's toy.

[H] Woman rides on child's toy.

[LABEL] entailment [PRED] entailment [COEFF] 6.4652

[P] Some south american children walk a bike through the beach.

[H] Some children walk with a bike on the beach.

[LABEL] entailment [PRED] entailment [COEFF] 6.4068

[P] Three people looking at a chair in the front yard.

[H] The people are looking at a chair.

[LABEL] entailment [PRED] entailment [COEFF] 6.3565

[P] A female in a sweater vest with a name tag on it is holding a bat.

[H] A female holding a bat, was wearing a sweater vest with a name tag

[LABEL] entailment [PRED] entailment [COEFF] 6.2396

[P] Young children play with a telescope.

[H] The children are playing with a telescope.

[LABEL] entailment [PRED] entailment [COEFF] 6.2364

[P] Two people are reading something while sitting on a bench.

[H] Two people seated on a bench while reading.

[LABEL] entailment [PRED] entailment [COEFF] 6.2030

[P] A woman on skis going up a hill carrying a pine tree.

[H] A woman carries a pine tree up a hill.

[LABEL] entailment [PRED] entailment [COEFF] 6.1153

[P] A large crowd of people next to a huge table with bananas on it.

[H] A group of people are near a table with bananas.

[LABEL] entailment [PRED] entailment [COEFF] 6.0376

[P] A child sitting on a carousel horse.

[H] A child sits on a carousel horse.

[LABEL] neutral [PRED] entailment [COEFF] 5.8070

[P] Several people are riding motorcycles down a narrow street.

[H] People riding bikes down narrow road

[LABEL] entailment [PRED] entailment [COEFF] 5.6274

[P] Wet dog jumping in water

[H] Dog jumping in water.

[LABEL] entailment [PRED] entailment [COEFF] 5.5375

[P] A tattooed man holds a young child who is clutching money.

[H] A man holding a young child holding money

[LABEL] entailment [PRED] entailment [COEFF] 5.4155

[P] Donkey pulled cart parked in front of small shops.

[H] Cart parked in front of small shops.

[LABEL] entailment [PRED] entailment [COEFF] 5.2316

[P] A man in a collared shirt and blue jeans is raking in his garden while a baby sits in a blue baby

- carrier attached to his back.

[H] The man in the collard shirt is raking.

[LABEL] entailment [PRED] entailment [COEFF] 5.1680

[P] Two men paint a curb on a busy street corner.

[H] Two men paint a curb.

## 1.457 Component 456

[LABEL] contradiction [PRED] contradiction [COEFF] 16.2867

[P] A man in denim overalls rides a segway down a city sidewalk.

[H] A woman in denim overalls rides a segway down a city sidewalk.

[LABEL] contradiction [PRED] contradiction [COEFF] 14.5245

[P] A man in a black shirt and jeans is purchasing food from a counter.

[H] A woman in a black shirt and jeans is purchasing food from a counter.

[LABEL] contradiction [PRED] contradiction [COEFF] 13.9416

[P] A man in blue and pink is on a bike.

[H] A woman in blue and pink is on a bike.

[LABEL] contradiction [PRED] contradiction [COEFF] 13.5085

[P] A man in a black sweater is painting in front of the river.

[H] A woman in a black sweater is painting in front of the river.

[LABEL] contradiction [PRED] contradiction [COEFF] 13.0950

[P] A long - haired young man skateboarding on the rails on a cloudy day.

[H] A long - haired woman is on the rails with a skateboard on a cloudy day.

[LABEL] contradiction [PRED] contradiction [COEFF] 13.0891

[P] A man in a brown jacket is looking at art.

[H] A woman in a brown jacket is looking at art.

[LABEL] contradiction [PRED] contradiction [COEFF] 12.9584

[P] A man with a tattoo behind his ear is playing a guitar.

[H] A woman with a tattoo behind her ear is playing a guitar.

[LABEL] contradiction [PRED] contradiction [COEFF] 12.8001

[P] A man in a hat is riding on horse and riding behind many bulls.

[H] A woman in a hat is riding a horse

[LABEL] contradiction [PRED] contradiction [COEFF] 12.4705

[P] An older man wearing a chinese outfit shooting a large bow at a target

[H] An older woman wearing a chinese outfit shooting a large bow at a target

[LABEL] contradiction [PRED] contradiction [COEFF] 12.3015

[P] A man in a plaid coat sells colorful balloons from a cart as people walk by.  
[H] A woman in a plaid coat sells colorful balloons from a cart as people walk by.

[LABEL] **contradiction** [PRED] **contradiction** [COEFF] 12.1313  
[P] A man in a yellow and red shirt is operating machinery.  
[H] A woman in a yellow and red shirt is operating machinery.

[LABEL] **contradiction** [PRED] **contradiction** [COEFF] 12.1175  
[P] A man in a gray shirt playing a whistle.  
[H] A woman in a gray shirt is playing a whistle.

[LABEL] **contradiction** [PRED] **contradiction** [COEFF] 11.9806  
[P] A man in a blue shirt is standing at a bar.  
[H] A woman in a blue shirt is standing at a bar.

[LABEL] **contradiction** [PRED] **contradiction** [COEFF] 11.7328  
[P] A man in a blue shirt is holding a sign asking for work.  
[H] A woman in a blue shirt is holding a sign asking for work.

[LABEL] **contradiction** [PRED] **contradiction** [COEFF] 10.6921  
[P] A man, in cowboy attire, rides a rearing horse in front of an audience.  
[H] A woman, in cowboy attire, rides a rearing horse in front of an audience.

[LABEL] **contradiction** [PRED] **contradiction** [COEFF] 10.6376  
[P] An old bearded man with long gray and light brown hair wearing a black cowboys hat, a black t - shirt, with a blue, white and red guitar strap around his head, standing in front of a microphone singing.  
[H] A woman with a beard is singing.

## 1.458 Component 457

[LABEL] **entailment** [PRED] **entailment** [COEFF] 30.2952  
[P] A man and a young child in water.  
[H] The people are in the water.

[LABEL] **entailment** [PRED] **entailment** [COEFF] 29.9537  
[P] A man and a woman are sitting on a yellow couch laughing under a yellow comforter with white daisies.  
[H] People are sitting

[LABEL] **entailment** [PRED] **entailment** [COEFF] 28.5673  
[P] A man and a young boy are outside, taking a break from riding a bike.  
[H] The people are outside.

[LABEL] **entailment** [PRED] **entailment** [COEFF] 27.9706  
[P] A woman and man are posing for a picture against a pink wall.  
[H] People are posing



[LABEL] entailment [PRED] entailment [COEFF] 26.7007  
[P] A woman swimming with two children in blue life vests  
[H] People are in the water.

[LABEL] entailment [PRED] entailment [COEFF] 22.6315  
[P] Two old men talk with each other in a rugged urban area.  
[H] People are talking with each other.

[LABEL] entailment [PRED] entailment [COEFF] 22.0722  
[P] Two boys and two girls strapped into a ride.  
[H] The people are on a ride.

[LABEL] entailment [PRED] entailment [COEFF] 21.7514  
[P] Two couples, two men and two women, dancing on a stage wearing all yellow.  
[H] People are dancing on stage.

[LABEL] entailment [PRED] entailment [COEFF] 21.7507  
[P] A man and young boy asleep in a chair.  
[H] The people are sleeping.

[LABEL] entailment [PRED] entailment [COEFF] 21.3059  
[P] Four men and two blond women sitting around a table.  
[H] People are sitting at a table

[LABEL] entailment [PRED] entailment [COEFF] 19.7915  
[P] Two guys and a girl, throwing in the water under bridge.  
[H] People are throwing water under the bridge.

[LABEL] entailment [PRED] entailment [COEFF] 19.1904  
[P] A man and child wearing a yellow life vest look up from the water.  
[H] People are in the water.

[LABEL] entailment [PRED] entailment [COEFF] 19.0643  
[P] The students sitting on the grass are eating a lunch from a red backpack.  
[H] People are eating lunch.

[LABEL] entailment [PRED] entailment [COEFF] 18.9257  
[P] A man in a pink shirt and a woman in a teal shirt, who is drinking wine, are sitting in a dark corner and talking.  
[H] People are talking.

[LABEL] entailment [PRED] entailment [COEFF] 18.4031  
[P] A man running with a ball as his opponent tries to grab him.  
[H] People are running

[LABEL] entailment [PRED] entailment [COEFF] 18.3788  
[P] A man and a child stand next to a blue and black tube.

[H] The people are standing near a tube.

## 1.459 Component 458

[LABEL] **neutral** [PRED] **neutral** [COEFF] 8.1017

[P] A group of people form a procession, several of them holding signs with photographs on them.

[H] The majority of the group of people in the procession are happy to be there.

[LABEL] **neutral** [PRED] **neutral** [COEFF] 8.0623

[P] Two asian women and an asian girl are sitting at a farmers market and are selling produce including yams.

[H] The women made a lot of money selling yams.

[LABEL] **neutral** [PRED] **neutral** [COEFF] 8.0462

[P] A band is performing on a stage.

[H] The band is very popular and their concert is sold out.

[LABEL] **neutral** [PRED] **neutral** [COEFF] 7.9337

[P] A girl playing her guitar in her bedroom.

[H] The girl is playing her favorite song on her guitar.

[LABEL] **neutral** [PRED] **neutral** [COEFF] 7.7882

[P] The tow company is named " sovereign ".

[H] Sovereign is very successful

[LABEL] **neutral** [PRED] **neutral** [COEFF] 7.6577

[P] A market offers a variety of fresh, colorful vegetables in the open air.

[H] The open air market is very popular

[LABEL] **neutral** [PRED] **neutral** [COEFF] 7.6551

[P] A woman standing in front of a beach scene and smiling.

[H] A woman standing by the beach is smiling because it is warm.

[LABEL] **neutral** [PRED] **neutral** [COEFF] 7.5877

[P] In the beach a woman is balancing a basket of shells on her head.

[H] A lady has a basket on her head because it makes people laugh

[LABEL] **neutral** [PRED] **neutral** [COEFF] 7.5194

[P] A boy throws a deck of cards into the air with a smile on his face.

[H] The smiling boy has thrown the deck of cards into the air because it's his birthday.

[LABEL] **neutral** [PRED] **neutral** [COEFF] 7.2612

[P] A little boy in a red soccer uniform is standing next to a soccer net.

[H] The boy is proud to be a member of the team

[LABEL] **neutral** [PRED] **neutral** [COEFF] 7.1675

[P] A large group of people are gathered.

[H] A group of people gather to discuss public policy

[LABEL] **neutral** [PRED] **neutral** [COEFF] 6.9523

[P] A man dressed all in white wearing a white mask on his face pretending to be a statue in a plaza.

[H] The man has a history of mental disorders.

[LABEL] **neutral** [PRED] **neutral** [COEFF] 6.9407

[P] Three researchers working in a lab.

[H] The researchers are discovering a cure for a disease.

[LABEL] **neutral** [PRED] **neutral** [COEFF] 6.8384

[P] 4 members of a band are playing together outside on a sidewalk.

[H] The four band members are best friends.

[LABEL] **neutral** [PRED] **neutral** [COEFF] 6.8214

[P] A athletic man is smoking a cigarette while on break from work.

[H] The smoking athletic man is taking a break because his work is stressful.

[LABEL] **contradiction** [PRED] **neutral** [COEFF] 6.7109

[P] There are buildings in the background.

[H] The buildings are incredibly tall.

## 1.460 Component 459

[LABEL] **contradiction** [PRED] **contradiction** [COEFF] 8.5683

[P] A group of people gathered in a large room that has beautiful architectural elements.

[H] People are playing miniature golf outside in a sandstorm.

[LABEL] **contradiction** [PRED] **contradiction** [COEFF] 7.6975

[P] A large crowd of people walk around on a busy street.

[H] A crowd of people play in the lake.

[LABEL] **contradiction** [PRED] **contradiction** [COEFF] 6.0242

[P] A large group of men are gathered around a lantern at night.

[H] The men are playing frisbee in the sunshine.

[LABEL] **contradiction** [PRED] **contradiction** [COEFF] 5.8057

[P] People are on stage playing music to a group of people.

[H] A man is playing a trumpet on a mountain top.

[LABEL] **contradiction** [PRED] **contradiction** [COEFF] 5.5564

[P] Many people are spread out along a beach or lagoon enjoying themselves.

[H] People are inside watching a boxing match.

[LABEL] **contradiction** [PRED] **contradiction** [COEFF] 5.5087

[P] A music band performing on stage.

[H] Street performers play bongos at the park.

[LABEL] **contradiction** [PRED] **contradiction** [COEFF] 5.2063

[P] A group of people ride scooters and motorcycles on a street.

[H] A groups of people are riding atvs in the desert.

[LABEL] **contradiction** [PRED] **contradiction** [COEFF] 5.1750

[P] A large yellow sign on the side of a building.

[H] There's a sign in the grassy field.

[LABEL] **contradiction** [PRED] **contradiction** [COEFF] 5.1376

[P] A group of people gathered outside at a patio table.

[H] People are playing the tuba in a car

[LABEL] **contradiction** [PRED] **contradiction** [COEFF] 5.1316

[P] Two little girls stand against a wall, one girl has a happy face and the other girl has a sad face.

[H] Two little girls are swinging on the swing set.

[LABEL] **contradiction** [PRED] **contradiction** [COEFF] 5.1177

[P] A three member band plays intensely in a club with flashy designs and lights in the background.

[H] The band is making computer parts in a teepee

[LABEL] **contradiction** [PRED] **contradiction** [COEFF] 4.9962

[P] Three young men are celebrating together in public.

[H] Two cowboys ride across a hill with the sunset in front of them.

[LABEL] **contradiction** [PRED] **contradiction** [COEFF] 4.8860

[P] Three black dogs play in the glass.

[H] Three canines are attacking a pokemon in the tall grass.

[LABEL] **contradiction** [PRED] **contradiction** [COEFF] 4.8098

[P] Two men and a woman stroll down the city street past storefronts.

[H] The men and women are indoors playing monopoly.

[LABEL] **contradiction** [PRED] **contradiction** [COEFF] 4.8049

[P] Festival with 7 people in the night holding up there hands.

[H] People are picnicking in the sun.

[LABEL] **contradiction** [PRED] **contradiction** [COEFF] 4.8034

[P] A snowboarder is jumping over a snowy hill

[H] A snowboarder performs a trick in the half pipe.

## 1.461 Component 460

[LABEL] **neutral** [PRED] **neutral** [COEFF] 65.9805

[P] A man wearing red shorts is holding onto the rocks beside the water.  
[H] A sad man wearing red shorts is holding onto the rocks beside the water.

[LABEL] **neutral** [PRED] **neutral** [COEFF] 61.1716  
[P] A woman in jeans and a woman in a white skirt are walking in a building.  
[H] A sad woman in jeans and a woman in a white skirt is walking in a building.

[LABEL] **neutral** [PRED] **neutral** [COEFF] 61.0222  
[P] A woman in a white shirt and a skirt is singing into a microphone.  
[H] A sad woman in a white shirt and a skirt is singing into a microphone.

[LABEL] **neutral** [PRED] **neutral** [COEFF] 59.6664  
[P] A man wearing a plaid hat sits in a lawn chair reading a magazine  
[H] A sad man wearing a plaid hat sits in a lawn chair reading a magazine

[LABEL] **neutral** [PRED] **neutral** [COEFF] 57.6218  
[P] A woman and two children are handling a blown - up blue glove.  
[H] A sad woman and two children are handling a blown - up blue glove.

[LABEL] **neutral** [PRED] **neutral** [COEFF] 57.6125  
[P] A man in brown jacket and blue cap is washing a black jacket in fountain.  
[H] A sad man in brown jacket and blue cap is washing a black jacket in fountain.

[LABEL] **neutral** [PRED] **neutral** [COEFF] 57.3301  
[P] A man is laying down outside with his dog.  
[H] A sad man is laying down outside with his dog.

[LABEL] **neutral** [PRED] **neutral** [COEFF] 57.3117  
[P] A woman wearing a hat leans over to a man who has a tattoo.  
[H] A sad woman wearing a hat leans over to a man who has a tattoo.

[LABEL] **neutral** [PRED] **neutral** [COEFF] 57.0513  
[P] A man walking next to a little boy wearing a backpack.  
[H] A sad man walking next to a little boy wearing a backpack.

[LABEL] **neutral** [PRED] **neutral** [COEFF] 56.5729  
[P] Two boys in the sand are standing near a structure with yellow railings.  
[H] Two sad boys in the sand are standing near a structure with yellow railings.

[LABEL] **neutral** [PRED] **neutral** [COEFF] 56.5188  
[P] A woman in a pink shirt wrapped up in a blue blanket asleep in a car.  
[H] A sad woman in a pink shirt wrapped up in a blue blanket asleep in a car.

[LABEL] **neutral** [PRED] **neutral** [COEFF] 56.3295  
[P] A man grinds a piece of metal in front of an onlooker on a studio set.  
[H] A sad man grinds a piece of metal in front of an onlooker on a studio set.

[LABEL] **neutral** [PRED] **neutral** [COEFF] 56.1213  
 [P] A girl in water - wear has skipped a stone off an enclosed body of water.  
 [H] A sad girl in water - wear has skipped a stone off an enclosed body of water.

[LABEL] **neutral** [PRED] **neutral** [COEFF] 55.8429  
 [P] A man is sitting on door steps in front of a house.  
 [H] A sad man is sitting on door steps in front of a house.

[LABEL] **neutral** [PRED] **neutral** [COEFF] 54.6860  
 [P] A man wearing black pants is holding up a jackhammer next to a broken cement walkway.  
 [H] A sad man wearing black pants is holding up a jackhammer next to a broken cement walkway.

[LABEL] **neutral** [PRED] **neutral** [COEFF] 54.5402  
 [P] A woman in a black dress and long hair is posing on a soccer field holding a soccer ball.  
 [H] A sad woman in a black dress and long hair is posing on a soccer field holding a soccer ball.

## 1.462 Component 461

[LABEL] **contradiction** [PRED] **contradiction** [COEFF] 21.9916  
 [P] A large brown dog is running through a field of flowers.  
 [H] The dog is sleeping in the flowers.

[LABEL] **contradiction** [PRED] **contradiction** [COEFF] 16.5153  
 [P] Three dogs play together in the field.  
 [H] The pets are sleeping on a couch.

[LABEL] **contradiction** [PRED] **contradiction** [COEFF] 15.9789  
 [P] A dog runs across the grass.  
 [H] The dog is sleeping.

[LABEL] **contradiction** [PRED] **contradiction** [COEFF] 15.2842  
 [P] A gray fuzzy dog running through snow.  
 [H] The dog is sleeping by the fire.

[LABEL] **contradiction** [PRED] **contradiction** [COEFF] 15.2511  
 [P] A brown dog is running through the ocean.  
 [H] The dog is sleeping on a towel under an umbrella

[LABEL] **contradiction** [PRED] **contradiction** [COEFF] 14.1856  
 [P] Young kids are on a small train ride.  
 [H] The kids are sleeping in their beds.

[LABEL] **contradiction** [PRED] **contradiction** [COEFF] 13.8813  
 [P] Two people with hiking gear at a checkpoint on a mountain.  
 [H] The two people are sleeping in the sand.

[LABEL] **contradiction** [PRED] **contradiction** [COEFF] 13.3295  
[P] A bunch of people walking up and down a subway station.  
[H] The people are sleeping at home.

[LABEL] **contradiction** [PRED] **contradiction** [COEFF] 13.0851  
[P] A brown dog chases a blond one in the grass.  
[H] The dogs are inside sleeping in their cages.

[LABEL] **contradiction** [PRED] **contradiction** [COEFF] 12.7767  
[P] A dog runs in a field.  
[H] A dog is sleeping on his favorite cushion.

[LABEL] **contradiction** [PRED] **contradiction** [COEFF] 12.7592  
[P] A group of children running towards the ice cream truck.  
[H] The children are asleep

[LABEL] **contradiction** [PRED] **contradiction** [COEFF] 12.6575  
[P] Two dogs run up a hill with their tongues out.  
[H] The dogs are resting in the shade.

[LABEL] **contradiction** [PRED] **contradiction** [COEFF] 12.6394  
[P] Three dogs on grass running towards the camera.  
[H] The dogs are resting

[LABEL] **contradiction** [PRED] **contradiction** [COEFF] 12.6324  
[P] Two dogs run toward each other.  
[H] The dogs are eating

[LABEL] **contradiction** [PRED] **contradiction** [COEFF] 12.4303  
[P] A small dog wearing a sweater walking in the snow.  
[H] The dog is sleeping in the dog house.

[LABEL] **contradiction** [PRED] **contradiction** [COEFF] 12.2429  
[P] A black dog running along the water  
[H] The dog lays down on the grass.

### 1.463 Component 462

[LABEL] **entailment** [PRED] **entailment** [COEFF] 17.5366  
[P] Two people sit on a bench overlooking a vast amount of windows.  
[H] Two people sitting down on a bench.

[LABEL] **entailment** [PRED] **entailment** [COEFF] 16.0938  
[P] Older man is sitting on a bench with his two bags.  
[H] Older man is sitting on a bench.

[LABEL] entailment      [PRED] entailment      [COEFF] 14.7589  
 [P] A woman sitting on a chair sewing.  
 [H] A woman is sitting in a chair.

[LABEL] entailment      [PRED] entailment      [COEFF] 14.6404  
 [P] A man sits on a street bench, looking after three young boys.  
 [H] A man sitting on a bench

[LABEL] entailment      [PRED] entailment      [COEFF] 14.5649  
 [P] A child sitting with a stuffed toy on a couch  
 [H] A child is on a couch.

[LABEL] entailment      [PRED] entailment      [COEFF] 14.3050  
 [P] A man is sitting on a bench facing the mountains.  
 [H] A man sitting on bench

[LABEL] entailment      [PRED] entailment      [COEFF] 13.9671  
 [P] Two men sit on a bench.  
 [H] Two men are on a bench.

[LABEL] entailment      [PRED] entailment      [COEFF] 13.7965  
 [P] A man sitting on a chair next to books is sleeping.  
 [H] A man sleeps on a chair.

[LABEL] entailment      [PRED] entailment      [COEFF] 12.8819  
 [P] A group of people are sitting on chairs in a circle together.  
 [H] A group sit in chairs in a circle

[LABEL] entailment      [PRED] entailment      [COEFF] 11.9942  
 [P] A man is sitting in the tub with his feet up.  
 [H] The man sat in the tub.

[LABEL] entailment      [PRED] entailment      [COEFF] 11.9899  
 [P] An asian couple sitting on the bench.  
 [H] A couple sitting on the bench.

[LABEL] entailment      [PRED] entailment      [COEFF] 11.8605  
 [P] A group of people sit in chairs around a table while a grill cooks food.  
 [H] A group of people sit in chairs

[LABEL] entailment      [PRED] entailment      [COEFF] 11.4446  
 [P] A young man standing on a patio.  
 [H] A young man is outside on a patio.

[LABEL] entailment      [PRED] entailment      [COEFF] 11.1581  
 [P] A man is sitting on a bench in front of a large white building.



[H] A man is sitting on a bench.

[LABEL] entailment [PRED] entailment [COEFF] 10.9597

[P] A bird is sitting in a tree.

[H] A bird sits in a tree.

[LABEL] entailment [PRED] entailment [COEFF] 10.8069

[P] A child sitting at a restaurant table holding a paper mask against his face.

[H] A child is sitting at a restaurant table.

### 1.464 Component 463

[LABEL] entailment [PRED] entailment [COEFF] 47.6786

[P] A rugby player is running with the ball as a defender moves to intervene.

[H] People are playing rugby.

[LABEL] entailment [PRED] entailment [COEFF] 41.4682

[P] Two opposing soccer players both go for the ball with the one in yellow heading the ball.

[H] People are playing soccer.

[LABEL] entailment [PRED] entailment [COEFF] 37.8475

[P] Football player in black and yellow avoiding tackles by three players in red.

[H] People are playing football

[LABEL] entailment [PRED] entailment [COEFF] 36.3332

[P] Two soccer players fighting over the soccer ball with the referee in the background.

[H] People play soccer

[LABEL] entailment [PRED] entailment [COEFF] 35.4329

[P] Two girls play softball, one slides into plate as other fails to catch ball.

[H] People are playing sports.

[LABEL] entailment [PRED] entailment [COEFF] 33.6644

[P] Three soccer players, the one in blue and red possess the ball and the one on white is trying to steal it away.

[H] People are playing a sport

[LABEL] entailment [PRED] entailment [COEFF] 32.1202

[P] A male runner wearing a red shirt grimaces as he is overtaken by another male runner who is wearing the number 161 on his chest.

[H] People are running.

[LABEL] entailment [PRED] entailment [COEFF] 30.3219

[P] The basketball player looks around the court as another player tries to block him.

[H] People playing basketball

[LABEL] entailment [PRED] entailment [COEFF] 29.1475

[P] A youth soccer game, with one girl primarily in black and the other in yellow, is contested on a grass field.

[H] People are playing soccer

[LABEL] **entailment** [PRED] **entailment** [COEFF] 28.9823

[P] Colorful yellow seats with a sparse crowd line up behind four soccer players trying to go after a ball.

[H] People are playing soccer.

[LABEL] **entailment** [PRED] **entailment** [COEFF] 26.8020

[P] A quarterback hands off the football to a running back.

[H] There are people playing football.

[LABEL] **entailment** [PRED] **entailment** [COEFF] 26.0467

[P] Two opposing players are in the air during a rugby match.

[H] People are playing rugby.

[LABEL] **entailment** [PRED] **entailment** [COEFF] 23.9090

[P] Several basketball players are grabbing for the ball during a game.

[H] The people are playing sports.

[LABEL] **entailment** [PRED] **entailment** [COEFF] 22.3373

[P] A man running with a ball as his opponent tries to grab him.

[H] People are running

[LABEL] **entailment** [PRED] **entailment** [COEFF] 21.6908

[P] Ice hockey goalie in white and blue prepares to block the puck from opposing player in blue.

[H] Hockey players are playing a game.

[LABEL] **entailment** [PRED] **entailment** [COEFF] 21.5192

[P] Picture of hockey team while goal is being scored.

[H] People are playing hockey.

## 1.465 Component 464

[LABEL] **contradiction** [PRED] **contradiction** [COEFF] 6.2156

[P] A woman dressed in red sits at a table and sews with a sewing machine.

[H] A man eats a hamburger.

[LABEL] **contradiction** [PRED] **contradiction** [COEFF] 5.0326

[P] A fireman gazes out around him in deep thought.

[H] A woman bakes a cake.

[LABEL] **contradiction** [PRED] **contradiction** [COEFF] 4.8707

[P] A man is fixing the guitar players costume.

[H] A poor woman does laundry.

[LABEL] contradiction [PRED] contradiction [COEFF] 4.7888

[P] A woman standing near a decorated wall writes.

[H] A man is drawing at his desk.

[LABEL] contradiction [PRED] contradiction [COEFF] 4.7463

[P] A woman in a sheer white top is bowling.

[H] A man is cooking dinner.

[LABEL] contradiction [PRED] contradiction [COEFF] 4.7173

[P] A man is riding a bull at a rodeo setting with a small crowd watching.

[H] A woman eating a cow

[LABEL] contradiction [PRED] contradiction [COEFF] 4.6220

[P] A black boy dressed in black shorts and shirt kicks a soccer ball on sand, while others watch.

[H] A young girl skips rope while others watch.

[LABEL] contradiction [PRED] contradiction [COEFF] 4.5036

[P] A man plays ball with a little boy.

[H] A woman shaving her head

[LABEL] contradiction [PRED] contradiction [COEFF] 4.4548

[P] A man with a suitcase walks through an alley between two large buildings.

[H] A woman dancing in a park

[LABEL] contradiction [PRED] contradiction [COEFF] 4.4334

[P] A young woman playing a cello.

[H] A man is singing in the bathroom.

[LABEL] contradiction [PRED] contradiction [COEFF] 4.4075

[P] A woman wearing rubber gloves is kneeling on the ground next to a few round, colorful, chinese lanterns.

[H] A man eats a banana.

[LABEL] contradiction [PRED] contradiction [COEFF] 4.3931

[P] A man watches the waves from the ship deck as he ties a rope.

[H] A woman is on a plane.

[LABEL] contradiction [PRED] contradiction [COEFF] 4.3391

[P] A little kid is practicing his golf skills with his grandfather.

[H] A girl is having tea with her grandmother.

[LABEL] contradiction [PRED] contradiction [COEFF] 4.2890

[P] A boy is wakeboarding on a lake with one hand.

[H] A nun on a park bench.

[LABEL] contradiction [PRED] contradiction [COEFF] 4.2802

[P] A man gives a speech in front of a tv.

[H] The woman is swimming in the ocean.

[LABEL] **contradiction** [PRED] **contradiction** [COEFF] 4.2082

[P] A man drives a large truck.

[H] A woman is drinking tea.

## 1.466 Component 465

[LABEL] **contradiction** [PRED] **contradiction** [COEFF] 8.3741

[P] A man putting shingles on a roof.

[H] A man is chopping down a tree.

[LABEL] **contradiction** [PRED] **contradiction** [COEFF] 8.2504

[P] A man touching fruit from a street fruit vendor.

[H] A man is returning a shirt to the store.

[LABEL] **contradiction** [PRED] **contradiction** [COEFF] 7.9708

[P] A woman is carving an ice sculpture with a knife.

[H] A woman is frosting a cake.

[LABEL] **contradiction** [PRED] **contradiction** [COEFF] 7.1495

[P] People are fixing the roof of a house.

[H] People mowing the lawn

[LABEL] **contradiction** [PRED] **contradiction** [COEFF] 7.0617

[P] A woman makes a horse shoe with a hammer.

[H] The woman is knitting a blanket for her pony.

[LABEL] **contradiction** [PRED] **contradiction** [COEFF] 6.9701

[P] A man is fishing in a foggy lake.

[H] A man cutting wood by his house.

[LABEL] **contradiction** [PRED] **contradiction** [COEFF] 6.8541

[P] Woman with long hair walking in a field of grass and goldenrod.

[H] A woman doing the laundry indoors

[LABEL] **contradiction** [PRED] **contradiction** [COEFF] 6.8080

[P] There is a man working on the roof of a house that is either being newly built or remodeled.

[H] A man is mowing the lawn of the house.

[LABEL] **contradiction** [PRED] **contradiction** [COEFF] 6.6745

[P] A man chiseling wood, holding a pencil behind his right ear.

[H] A man is creating a statue of marble.

[LABEL] **contradiction** [PRED] **contradiction** [COEFF] 6.5380

[P] A lady sleeps while seated in a yellow chair.

[H] A lady is knitting a sweater.

[LABEL] **contradiction** [PRED] **contradiction** [COEFF] 6.4906

[P] Two indians are selling potato chips to pedestrians as street - side vendors.

[H] The indians are selling clothes

[LABEL] **contradiction** [PRED] **contradiction** [COEFF] 6.4391

[P] A man wearing a black jacket is working on a roof.

[H] A man fixes an oven in a kitchen.

[LABEL] **contradiction** [PRED] **contradiction** [COEFF] 6.2739

[P] A smiling cook is putting sausages on the grill.

[H] A baker is putting a cake in the oven.

[LABEL] **contradiction** [PRED] **contradiction** [COEFF] 6.1872

[P] Women manually turns a vintage singer sewing machine.

[H] A woman is painting a picture.

[LABEL] **contradiction** [PRED] **contradiction** [COEFF] 6.1068

[P] A man wearing black and white stripes is trying to stop a horse.

[H] A man is feeding fish to a seal.

[LABEL] **contradiction** [PRED] **contradiction** [COEFF] 6.0402

[P] A woman with gray hair is putting potatoes on to fry.

[H] A woman is ironing her clothes.

## 1.467 Component 466

[LABEL] **entailment** [PRED] **entailment** [COEFF] 25.5937

[P] A man in a blue shirt and jeans grinds down a rail on his skateboard.

[H] A man is skateboarding.

[LABEL] **entailment** [PRED] **entailment** [COEFF] 22.2248

[P] A man in a black ball cap skateboarding down a metal railing.

[H] A man is skateboarding.

[LABEL] **entailment** [PRED] **entailment** [COEFF] 21.1145

[P] A boy on a skateboard is riding on a stone wall

[H] The boy is skateboarding.

[LABEL] **entailment** [PRED] **entailment** [COEFF] 20.9933

[P] A man in a wetsuit surfs waves with the view of a city behind him.

[H] A man is surfing.

[LABEL] **entailment** [PRED] **entailment** [COEFF] 20.8209

[P] A man on a fishing boat pushing a wooden pole into the water.

[H] A man is fishing.

[LABEL] entailment [PRED] entailment [COEFF] 20.0108

[P] A surfer in a wetsuit rides a wave.

[H] A person is surfing.

[LABEL] entailment [PRED] entailment [COEFF] 17.7581

[P] A man scuba diving while holding a large flashlight.

[H] A man is scuba diving.

[LABEL] entailment [PRED] entailment [COEFF] 16.4585

[P] A young man soars through the air on a surfboard.

[H] A young man is surfing.

[LABEL] entailment [PRED] entailment [COEFF] 15.6512

[P] Woman rolling a ball down a bowling alley.

[H] A lady is bowling.

[LABEL] entailment [PRED] entailment [COEFF] 15.3951

[P] People rollerskating on an ice rink.

[H] People are ice skating.

[LABEL] entailment [PRED] entailment [COEFF] 15.3818

[P] A surfer catching a big wave in the ocean.

[H] A person is surfing.

[LABEL] entailment [PRED] entailment [COEFF] 15.2015

[P] A man who is fishing from a boardwalk is casting his fishing pole over the railing.

[H] A man is fishing.

[LABEL] entailment [PRED] entailment [COEFF] 14.0799

[P] A woman dances in a colorful dress, engaged in a writhing dance taught to her by her elders.

[H] A woman is dancing.

[LABEL] entailment [PRED] entailment [COEFF] 13.8719

[P] There is a surfer in the water, wearing a red and black bodysuit, catching a wave with his hands out for balance.

[H] A person is surfing.

[LABEL] entailment [PRED] entailment [COEFF] 13.6575

[P] A man on inline skates does a trick on a cracked concrete ramp.

[H] A man is skating.

[LABEL] neutral [PRED] entailment [COEFF] 13.6253

[P] A person climbing up the side of a snowy mountain to fetch his or her ski poles.

[H] A person is skiing.

## 1.468 Component 467

[LABEL] entailment [PRED] contradiction [COEFF] 18.6689

[P] A man dressed in white walks a yellow rope on the ground that is attached to the handlebars of a bicycle.

[H] A man walks a rope on the ground attached to a big.

[LABEL] neutral [PRED] neutral [COEFF] 15.1306

[P] A little girl of asian descent, is sitting in a black bucket eating a marshmallow, with a big smile on her face.

[H] A girl is sitting inside a giant bucket on a dock eating a melted marshmallow.

[LABEL] neutral [PRED] contradiction [COEFF] 14.9989

[P] A man in a black suit, is standing in front of a group of people in white suits and black dresses.

[H] A tall person in a suit

[LABEL] neutral [PRED] neutral [COEFF] 13.6502

[P] A group of five people stand outdoors.

[H] A group of people stand together

[LABEL] contradiction [PRED] contradiction [COEFF] 13.6432

[P] Javelin thrower wearing a dark shirt and preparing to throw.

[H] A person is wearing a white shirt.

[LABEL] neutral [PRED] neutral [COEFF] 13.6114

[P] The group of women is wearing an all white costume.

[H] Tall women in a costume

[LABEL] neutral [PRED] neutral [COEFF] 13.5653

[P] Two men wearing black clothes and hats, one is playing the saxophone and one is playing the trumpet.

[H] People with huge hats

[LABEL] neutral [PRED] contradiction [COEFF] 13.3444

[P] A woman just releasing a bowling ball down the bowling alley.

[H] A woman is rolling a ball toward pins.

[LABEL] neutral [PRED] contradiction [COEFF] 13.0076

[P] A golden colored dog jumps around in the grass while holding a stick in its mouth.

[H] A tall animal jumps

[LABEL] neutral [PRED] neutral [COEFF] 12.6839

[P] Three dogs are playing rough in a sandy field.

[H] Three dogs playing in their favorite field.

[LABEL] neutral [PRED] neutral [COEFF] 12.5682

[P] A black dog leaping off the sand.

[H] A dog jumping with joy for his owner

[LABEL] entailment [PRED] neutral [COEFF] 12.2679  
[P] A man walking in the desert wearing a hat, khaki shirt and shorts and very dark sky ahead of him.  
[H] A man is dressed for warm weather.

[LABEL] neutral [PRED] neutral [COEFF] 12.2076  
[P] A lady in a black jacket walking on a sidewalk with a mural that contains a skunk and a snake in the background.  
[H] A lady walks next to a freshly painted mural

[LABEL] neutral [PRED] neutral [COEFF] 12.1455  
[P] Man holding a blue sash that is around a woman wearing a black robe.  
[H] A tall person in a robe

[LABEL] entailment [PRED] neutral [COEFF] 11.9830  
[P] A man with dark hair wearing a blue shirt and long pants walks in a dark area.  
[H] The man dressed warmly

[LABEL] entailment [PRED] contradiction [COEFF] 11.1754  
[P] The fuzzy photo shows a male singer at a mike, with instruments arranged in the background.  
[H] A singer standing in front of instruments.

## 1.469 Component 468

[LABEL] contradiction [PRED] contradiction [COEFF] 33.9392  
[P] A man is sitting on a bench in front of water fountain.  
[H] The man is standing.

[LABEL] contradiction [PRED] contradiction [COEFF] 31.5020  
[P] An african american woman sitting on a seat holding her purse talking on her cellphone.  
[H] The woman is standing.

[LABEL] contradiction [PRED] contradiction [COEFF] 30.2567  
[P] A little blond girl sitting on the floor looks up.  
[H] The little girl is standing.

[LABEL] contradiction [PRED] contradiction [COEFF] 29.9823  
[P] A man sitting on the floor next to a broom an bucket.  
[H] The man is standing

[LABEL] contradiction [PRED] contradiction [COEFF] 29.4827  
[P] Two women sitting under a tent, one with shirt red - hair, dark clothes drinking and the other laying down playing the guitar in a green top and jean peddle pushers both barefoot.  
[H] The women are standing.

[LABEL] contradiction [PRED] contradiction [COEFF] 26.5727  
[P] A woman is sitting on the ground while weaving something with the colors red, white, and blue.  
[H] The woman is standing



[LABEL] **contradiction** [PRED] **contradiction** [COEFF] 25.5846

[P] A little girl with blond - hair is smiling and sitting in a swing.

[H] The girl is standing.

[LABEL] **entailment** [PRED] **contradiction** [COEFF] 25.5012

[P] Two grinning girls in white jump on a green sofa.

[H] The girls are standing.

[LABEL] **contradiction** [PRED] **contradiction** [COEFF] 25.4253

[P] Man laying down on side of yellow door.

[H] The man is standing.

[LABEL] **contradiction** [PRED] **contradiction** [COEFF] 24.7162

[P] Three girls are sitting on the floor.

[H] The girls are standing.

[LABEL] **contradiction** [PRED] **contradiction** [COEFF] 23.4978

[P] The older man with the shopping bag and cane is sitting on a bench.

[H] The man is standing.

[LABEL] **contradiction** [PRED] **contradiction** [COEFF] 22.6077

[P] The little boy covering his mouth is sitting between a covering his eyes and another boy covering his ears.

[H] The boy is standing.

[LABEL] **contradiction** [PRED] **contradiction** [COEFF] 22.0673

[P] A man sits on plastic seats in front of a cow mural in a room filled with washing machines and dryers.

[H] The man is standing

[LABEL] **contradiction** [PRED] **contradiction** [COEFF] 21.6111

[P] A young woman is riding an elephant while the handler sits in front of her.

[H] The woman is standing.

[LABEL] **contradiction** [PRED] **contradiction** [COEFF] 21.3510

[P] A man sitting on the back of a truck underneath an umbrella.

[H] Everyone is standing.

[LABEL] **contradiction** [PRED] **contradiction** [COEFF] 20.9619

[P] A man is sitting on a short stool, with his back turned to the camera, facing some stacked orange and yellow crates.

[H] The man is standing by the camera.

## 1.470 Component 469

[LABEL] **neutral** [PRED] **entailment** [COEFF] 9.5045

[P] A little boy is watching a palace guard stand outside a little black hut.

[H] A palace guard watches a little boy watching him.

[LABEL] **entailment** [PRED] **entailment** [COEFF] 8.2617

[P] A woman displays a child's t - shirt with spiderman on it.

[H] A woman holds up a spiderman t - shirt for a child

[LABEL] **entailment** [PRED] **entailment** [COEFF] 7.5682

[P] A woman with earphones sits on a bench while writing.

[H] A woman writing things down while sitting on a bench.

[LABEL] **entailment** [PRED] **entailment** [COEFF] 7.4004

[P] The young boy learns how to ride a bike with his dad.

[H] Dad teaching his son to ride a bike

[LABEL] **entailment** [PRED] **entailment** [COEFF] 7.3735

[P] A man and a woman at a marketplace.

[H] A guy and lady are shopping.

[LABEL] **entailment** [PRED] **entailment** [COEFF] 7.1369

[P] A man is showing a girl a surfboard.

[H] A girl is seeing a man and a surfboard.

[LABEL] **entailment** [PRED] **entailment** [COEFF] 7.1086

[P] A woman and a boy enjoying a walk in woods.

[H] A woman and boy are walking on wood

[LABEL] **contradiction** [PRED] **entailment** [COEFF] 7.0961

[P] Dog splashes running across water.

[H] A dog swimming in a lake.

[LABEL] **entailment** [PRED] **entailment** [COEFF] 7.0737

[P] A person laying on the grass, in the shade, underneath a tree.

[H] A person is lying under the tree on grass to be in the shade.

[LABEL] **neutral** [PRED] **neutral** [COEFF] 6.9859

[P] Construction workers building a railroad.

[H] Workers are laying down metal rails for a track.

[LABEL] **neutral** [PRED] **entailment** [COEFF] 6.9441

[P] A person standing on a ridge in the desert.

[H] The person is in the desert.

[LABEL] **entailment** [PRED] **entailment** [COEFF] 6.7791

[P] A group of people is having coffee and getting some work done.

[H] Some people are working while having coffee.

[LABEL] **neutral** [PRED] **neutral** [COEFF] 6.7437

[P] A man in a cape is near a red building.  
[H] The man in the cape is walking towards the red building.

[LABEL] **entailment** [PRED] **entailment** [COEFF] 6.6954  
[P] A professional surfer brings along his dog to ride with him.  
[H] A man is about to surf with his dog

[LABEL] **entailment** [PRED] **entailment** [COEFF] 6.5449  
[P] Two men are sitting in a restaurant.  
[H] Two men sitting down.

[LABEL] **neutral** [PRED] **entailment** [COEFF] 6.4753  
[P] A girl in a striped blouse sits on a bench near a pay phone.  
[H] A girl uses the pay phone by the bench.

### 1.471 Component 470

[LABEL] **neutral** [PRED] **entailment** [COEFF] 46.9843  
[P] A man in a red shirt is peeling fruits and coconuts at a push cart.  
[H] A man is working at a push cart.

[LABEL] **entailment** [PRED] **entailment** [COEFF] 45.8791  
[P] Two men in uniform are tugging at a large cable wire.  
[H] Two men are working on a cable wire.

[LABEL] **entailment** [PRED] **entailment** [COEFF] 40.0399  
[P] A young smiling black man is hammering a nail in a piece of wood in front of a shed.  
[H] A man is using a hammer to construct a project.

[LABEL] **entailment** [PRED] **neutral** [COEFF] 39.4794  
[P] A man with glasses, a gray button - up shirt and black pants is standing next to a stage used for presentations and is using a power tool to grind an object next to a sawhorse, emitting many sparks downward.  
[H] The man is working on a project.

[LABEL] **neutral** [PRED] **entailment** [COEFF] 38.8649  
[P] Three men with reflective safety jackets are watching two men in reflective jackets put rocks into a hole in the road.  
[H] Some men are working on a road.

[LABEL] **entailment** [PRED] **entailment** [COEFF] 38.7000  
[P] There are two men on a ladder one is at the top handing down to the other guy the number " o " as this what they do for a living.  
[H] Two men are working.

[LABEL] **entailment** [PRED] **entailment** [COEFF] 38.6585  
[P] A woman in a blue shirt with a plaid skirt is sweeping a puddle of water outside.  
[H] A person is doing work outdoors.

[LABEL] **neutral** [PRED] **neutral** [COEFF] 37.9839

[P] A man is holding a hammer in one hand and piece of hot iron.

[H] A man working on a project.

[LABEL] **neutral** [PRED] **neutral** [COEFF] 37.3872

[P] A man stands behind some merchandise in an area with lots of candles.

[H] A man works in his candle store

[LABEL] **neutral** [PRED] **neutral** [COEFF] 35.0413

[P] A bike rider with khaki green shorts, a blue shirt, backpack and helmet is riding on the street near a red station wagon that is missing a hubcap on the back drivers side.

[H] A man is riding his bike to work.

[LABEL] **entailment** [PRED] **neutral** [COEFF] 34.7041

[P] A man and a young boy using screwdrivers at the base of a door.

[H] A boy is helping fix a door.

[LABEL] **neutral** [PRED] **neutral** [COEFF] 33.7524

[P] There is a shirtless toned white man standing on a balcony of a construction site and holding some sort of tool.

[H] The man is working at the construction site.

[LABEL] **entailment** [PRED] **entailment** [COEFF] 33.7297

[P] Two men with tool belts are fastening a sign to a building.

[H] Two men are working

[LABEL] **neutral** [PRED] **entailment** [COEFF] 32.9488

[P] A biker wearing a helmet and a red coat is raising his bike above his head with both hands.

[H] A biker in red is working on his bike.

[LABEL] **entailment** [PRED] **neutral** [COEFF] 32.9465

[P] A man wearing a white t - shirt with a green number 3 on the back is on his knees shining black shoes propped up on a box labeled " shoeshine ".

[H] The man is working.

[LABEL] **neutral** [PRED] **neutral** [COEFF] 32.5826

[P] A man squatting next to a bicycle.

[H] A man is working out.

## 1.472 Component 471

[LABEL] **neutral** [PRED] **neutral** [COEFF] 18.3745

[P] A red - haired girl, wearing a gray shirt, is playing on a tire swing along with her friend, whom is wearing a pink shirt.

[H] The girl and her friend are at a playground.

[LABEL] **neutral** [PRED] **entailment** [COEFF] 14.9904  
[P] Brunette female wearing yellow bikini top, has large tattoo inked across her lower back, and a blue towel draped across her right shoulder.  
[H] A woman with a tattoo at the beach.

[LABEL] **neutral** [PRED] **neutral** [COEFF] 14.9220  
[P] A woman in a swimsuit bumps the volleyball.  
[H] Some people are playing at the beach.

[LABEL] **neutral** [PRED] **neutral** [COEFF] 14.8561  
[P] A boy with a brown shirt is holding onto a person with a white shirt around a spray of water.  
[H] Some people are standing around a fountain.

[LABEL] **neutral** [PRED] **entailment** [COEFF] 14.8035  
[P] A shirtless man is standing next to two children balancing on a swing.  
[H] A family is playing in the park.

[LABEL] **neutral** [PRED] **entailment** [COEFF] 14.2310  
[P] Two boys, one in a red shirt, the other in a white shirt are splashing around in the water.  
[H] Two boys are playing in a pool.

[LABEL] **neutral** [PRED] **entailment** [COEFF] 13.7771  
[P] A young woman in a bikini holding a bottle is goofing around and kicking a man in a straw hat.  
[H] A couple is having fun on the beach.

[LABEL] **neutral** [PRED] **neutral** [COEFF] 13.6052  
[P] Brunette female wearing yellow bikini top, has large tattoo inked across her lower back, and a blue towel draped across her right shoulder.  
[H] A cute woman hangs out on a beach

[LABEL] **contradiction** [PRED] **neutral** [COEFF] 13.5470  
[P] Surrounded by tents, two women wearing bikinis and a man in a swim trunk work together to raise a flag pole, the top of which is a large one with white background and some green, big - toothed critter on it.  
[H] A crowd is standing around looking at a flagpole with a flag of a rabbit.

[LABEL] **neutral** [PRED] **neutral** [COEFF] 13.5370  
[P] Several people fishing with fishing poles on walkway boarded by water and decorated with lights.  
[H] Some people fish off of a pier at sunset.

[LABEL] **entailment** [PRED] **neutral** [COEFF] 13.4413  
[P] A woman in a red shirt and denim skirt takes a photograph of a sculpture that is surrounded by construction fences.  
[H] A woman is posing for a picture outside an old building.

[LABEL] **entailment** [PRED] **neutral** [COEFF] 13.2200  
[P] Two redheaded children play with bubbles with adults and a body of water in the background.  
[H] The children are playing with the adults near the lake.

[LABEL] **contradiction** [PRED] **entailment** [COEFF] 13.1155

[P] A dog has its head coming up from the water as it holds a stick.

[H] A wet dog stands on a shore.

[LABEL] **neutral** [PRED] **neutral** [COEFF] 12.9538

[P] A young child, wearing a blue shirt and green hat, is blowing up an orange balloon.

[H] The child is at a party.

[LABEL] **neutral** [PRED] **neutral** [COEFF] 12.3445

[P] Someone wearing a blue shirt is riding a bike with a child's seat on the front of it.

[H] A person is riding a bike on the street.

[LABEL] **neutral** [PRED] **entailment** [COEFF] 12.2816

[P] Two musicians in black playing a saxophone and trumpet around pine trees.

[H] Musicians play instruments at the park.

### 1.473 Component 472

[LABEL] **contradiction** [PRED] **contradiction** [COEFF] 36.6474

[P] A group of men dressed in santa attired play music on a street corner.

[H] The women are dressed as mrs. claus.

[LABEL] **contradiction** [PRED] **contradiction** [COEFF] 35.8005

[P] A group of young men are playing basketball outdoors.

[H] The women are playing

[LABEL] **contradiction** [PRED] **contradiction** [COEFF] 35.3136

[P] A group of men are chatting about the boat on display.

[H] Some women talk about a car.

[LABEL] **contradiction** [PRED] **contradiction** [COEFF] 34.4354

[P] Four men at a coffee, tea, and hot chocolate stand.

[H] The women are eating at a crepe shop

[LABEL] **contradiction** [PRED] **contradiction** [COEFF] 34.3552

[P] Three men are rushing down a sidewalk, looking happy.

[H] The women are driving

[LABEL] **contradiction** [PRED] **contradiction** [COEFF] 34.0836

[P] Two men on a blue canoe in the middle of a large body of water.

[H] Women are in a canoe.

[LABEL] **contradiction** [PRED] **contradiction** [COEFF] 30.3089

[P] A group of men are sitting around a table that has bottles of beer on it.

[H] A group of women are sitting around a completely clean table.

[LABEL] **contradiction** [PRED] **contradiction** [COEFF] 28.4271  
[P] Six men sit in front of a dock, four of them wearing blue.  
[H] Six women sit outside a mansion.

[LABEL] **contradiction** [PRED] **contradiction** [COEFF] 27.3356  
[P] Two men are paddling their small canoes through the water.  
[H] Two women ride in a balloon.

[LABEL] **contradiction** [PRED] **contradiction** [COEFF] 26.4158  
[P] Two men are raiding the rapids but only one is wearing a snorkel.  
[H] Two women are raiding the rapids but only one is wearing a snorkel.

[LABEL] **contradiction** [PRED] **contradiction** [COEFF] 25.5144  
[P] Two men, wrestling, the man in green has the guy in black shorts in an arm hold.  
[H] Two women play baseball.

[LABEL] **contradiction** [PRED] **contradiction** [COEFF] 25.4201  
[P] Three asian men standing under a white umbrella.  
[H] Three women are outside

[LABEL] **contradiction** [PRED] **contradiction** [COEFF] 25.0571  
[P] Three men in white are painting the railing of the pier blue.  
[H] Three women are painting the pier.

[LABEL] **contradiction** [PRED] **contradiction** [COEFF] 24.9737  
[P] Two men sit around a shiny grill.  
[H] Two women sit around a grill

[LABEL] **contradiction** [PRED] **contradiction** [COEFF] 24.9675  
[P] A group of men in navy uniforms saluting each other.  
[H] The women are wearing uniforms.

[LABEL] **contradiction** [PRED] **contradiction** [COEFF] 24.3146  
[P] Two men playing a game, running on a field.  
[H] Women are fishing off a pier.

### 1.474 Component 473

[LABEL] **contradiction** [PRED] **contradiction** [COEFF] 44.5153  
[P] A man dressed in red takes a picture of a sporting event.  
[H] The man is wearing a white tee shirt.

[LABEL] **contradiction** [PRED] **contradiction** [COEFF] 42.3357  
[P] An older man, with a blue shirt, sitting on sand, welds together pieces of metal.  
[H] The older man has a white shirt

[LABEL] contradiction [PRED] contradiction [COEFF] 41.8458

[P] A man in a blue unbuttoned shirt is walking through a local street market that is selling various fabrics.

[H] A man has a white unbuttoned shirt.

[LABEL] neutral [PRED] neutral [COEFF] 41.2120

[P] A man in a yellow construction hat with a tool bag on his back, is drilling a wall labeled superior walls.

[H] The tool bag is black.

[LABEL] contradiction [PRED] contradiction [COEFF] 40.9106

[P] A choir in festive red stand facing the congregation of a church with a high, cavernous, arching ceiling.

[H] The choir is wearing solid white.

[LABEL] contradiction [PRED] contradiction [COEFF] 39.2229

[P] A child in a red sweatshirt, jeans, and black bike helmet and a dog pose for a picture outdoors.

[H] The helmet is white.

[LABEL] contradiction [PRED] contradiction [COEFF] 37.6442

[P] A young man getting ready to hit a can with a orange and purple bat.

[H] The young man is holding a black wooden bat.

[LABEL] contradiction [PRED] neutral [COEFF] 36.9892

[P] A male tap dancer wearing black suspenders and a dress shirt is in front of a musical trio on a stage with one leg raised as he is in the middle of a dance move.

[H] A tap dancer in a red outfit is waiting to start his performance.

[LABEL] neutral [PRED] contradiction [COEFF] 36.0469

[P] A man in black shorts stands next to a bicycle, as a young girl in a lavender coat looks on.

[H] The man is next to a red bicycle.

[LABEL] neutral [PRED] contradiction [COEFF] 36.0120

[P] A woman in white is holding a bouquet of roses.

[H] A woman holds a bouquet of black roses.

[LABEL] neutral [PRED] neutral [COEFF] 35.1904

[P] A woman in a light colored dress is singing to an audience.

[H] A woman with black hair is singing to an audience.

[LABEL] contradiction [PRED] contradiction [COEFF] 34.1904

[P] A woman in a white shirt and shorts walks in front of a labeled parking garage with one entrance closed.

[H] The woman is in green suit

[LABEL] neutral [PRED] contradiction [COEFF] 33.7033

[P] A group of men dressed in blue in monk style robes kneeling and bowing on a wooden floor.



[H] The men are white men.

[LABEL] **contradiction** [PRED] **neutral** [COEFF] 32.8819

[P] A woman with medium - length brown hair and wearing a dark protective covering is sitting under a blow dryer.

[H] The woman has short blonde hair.

[LABEL] **neutral** [PRED] **neutral** [COEFF] 32.8046

[P] A blond man is holding a map while sitting in a boat.

[H] The map is blue.

[LABEL] **contradiction** [PRED] **contradiction** [COEFF] 31.6056

[P] A woman in a blue shirt is playing an instrument.

[H] A girl in red is sitting at the bar.

## 1.475 Component 474

[LABEL] **entailment** [PRED] **entailment** [COEFF] 24.7226

[P] A man in a black jacket and cap is talking to a woman with a blue scarf.

[H] Two people are having a conversation.

[LABEL] **entailment** [PRED] **entailment** [COEFF] 24.3821

[P] A girl in a red shirt and a guy in a black shirt are sitting on the front porch talking.

[H] Two people are talking

[LABEL] **entailment** [PRED] **entailment** [COEFF] 23.9308

[P] A man wearing a white shirt is talking to a woman wearing a green blouse on the street

[H] Two people are talking.

[LABEL] **entailment** [PRED] **entailment** [COEFF] 20.6367

[P] A woman in a red top holds hands with a man with a goatee.

[H] Two people are holding hands.

[LABEL] **entailment** [PRED] **entailment** [COEFF] 19.3188

[P] An elder workman speaking to a younger workman.

[H] Two people are talking

[LABEL] **entailment** [PRED] **entailment** [COEFF] 18.3963

[P] A man in a white robe with a purple sash places his hand on the forehead of another man.

[H] Two people are touching each other.

[LABEL] **neutral** [PRED] **entailment** [COEFF] 16.9504

[P] A man in a yellow shirt and a woman in a blue jacket are talking with stone buildings in the background.

[H] A couple talking.

[LABEL] **entailment** [PRED] **entailment** [COEFF] 16.6644

[P] A man in a gray jacket and white shirt is leaning against a railing and talking to another man.  
[H] Two men are talking.

[LABEL] **entailment** [PRED] **entailment** [COEFF] 15.9164

[P] A child in a black shirt is being embraced by an older man in a white shirt, the man's face pressed against the child's cheek.  
[H] Two people are touching each other.

[LABEL] **entailment** [PRED] **entailment** [COEFF] 15.7820

[P] A woman in a green suit and a man with a matching green tie hold hands in a crowd.  
[H] Two people are touching in a crowd.

[LABEL] **entailment** [PRED] **entailment** [COEFF] 15.5714

[P] A girl in a brown shirt talks on her phone while a girl and guy play guitar.  
[H] Two people are playing music

[LABEL] **entailment** [PRED] **entailment** [COEFF] 15.0722

[P] A man conducting with a woman holding a book.  
[H] Two people are near each other.

[LABEL] **entailment** [PRED] **entailment** [COEFF] 14.6341

[P] A well dressed man and woman are posing for a picture.  
[H] Two people are taking a picture together.

[LABEL] **entailment** [PRED] **entailment** [COEFF] 13.8747

[P] A woman with braided hair is laughing with a man in a red shirt.  
[H] Two people are talking.

[LABEL] **entailment** [PRED] **entailment** [COEFF] 13.5001

[P] A man and a woman standing on a street corner.  
[H] There are two people.

[LABEL] **entailment** [PRED] **entailment** [COEFF] 13.2525

[P] A blond and a red - haired woman sitting and having a drink together.  
[H] Two women are sitting together.

## 1.476 Component 475

[LABEL] **contradiction** [PRED] **contradiction** [COEFF] 3.2587

[P] A boy with goggles jumping into a pool containing a man.  
[H] A boy is eating a hamburger.

[LABEL] **contradiction** [PRED] **contradiction** [COEFF] 3.2476

[P] A man in a red outfit and black helmet is performing a stunt on a bicycle.  
[H] The man is driving his car.

[LABEL] contradiction [PRED] contradiction [COEFF] 3.2402

[P] A man in a blue shirt walks holding a young boy's hand outside in a garden.

[H] A man in a blue shirt is sitting in a coffee shop reading a newspaper.

[LABEL] contradiction [PRED] contradiction [COEFF] 3.1950

[P] A man with a bamboo bandanna looks off into the distance as he holds a bamboo fishing pole.

[H] The man is holding a hockey stick while looking into the distance.

[LABEL] contradiction [PRED] contradiction [COEFF] 3.1707

[P] A woman is gazing up at the sky while swinging on a swing.

[H] A woman is sitting on a bench smoking.

[LABEL] contradiction [PRED] contradiction [COEFF] 3.0346

[P] A girl wearing sandals is writing in a notebook while sitting in a chair outside.

[H] A girl is inside watching tv

[LABEL] contradiction [PRED] contradiction [COEFF] 2.9310

[P] A man is sitting in the back of his delivery truck with a giant umbrella that says new amsterdam.

[H] The man is sitting on a roller coaster.

[LABEL] contradiction [PRED] contradiction [COEFF] 2.8841

[P] A girl with bright red - hair and black clothes is posing on a tree trunk.

[H] A girl with red hair is lying on a towel at the beach.

[LABEL] contradiction [PRED] contradiction [COEFF] 2.8517

[P] A group of boys with croquet equipment stands on a lawn.

[H] The group of boys sit indoors watching television.

[LABEL] contradiction [PRED] contradiction [COEFF] 2.8405

[P] A woman begins to climb onto her bike.

[H] A woman sits on the couch watching tv.

[LABEL] contradiction [PRED] contradiction [COEFF] 2.7897

[P] A man in mid - air while going down a sand - dune.

[H] The man is skiing in the snow.

[LABEL] contradiction [PRED] contradiction [COEFF] 2.7827

[P] An old man is drinking a bottle of amber liquid.

[H] A man is eating a steak.

[LABEL] contradiction [PRED] contradiction [COEFF] 2.7684

[P] A small child holds a red umbrella upside down while standing barefoot in a muddy yard.

[H] The child is napping in a crib.

[LABEL] contradiction [PRED] contradiction [COEFF] 2.7426

[P] A man is doing a headstand, balanced on a bottle, on a street corner.

[H] A man is sitting down at a table.

[LABEL] contradiction [PRED] contradiction [COEFF] 2.7268

[P] Two women in white dresses are posing on a blanket for photographs in the middle of a park.

[H] The two women were watching tv

[LABEL] contradiction [PRED] contradiction [COEFF] 2.7137

[P] A jogger is making his way down a sidewalk on a nature trail.

[H] A jogger is sitting in a cafe

## 1.477 Component 476

[LABEL] contradiction [PRED] contradiction [COEFF] 9.7443

[P] Employee's are trying to fix the tangled nets for the fishing boat.

[H] The people are setting fire to the boat

[LABEL] contradiction [PRED] contradiction [COEFF] 9.1724

[P] A man and a woman pose in the snow with four children.

[H] An old man is falling to the ground.

[LABEL] contradiction [PRED] contradiction [COEFF] 8.1801

[P] A woman with a purple mo - hawk and a man with a goatee stand around talking.

[H] Two old women fight.

[LABEL] contradiction [PRED] contradiction [COEFF] 7.7905

[P] An older woman with a green plaid shopping cart removes money from her wallet to pay another woman for her green, leave - like goods.

[H] A woman is screaming at a woman behind a cash register because she hates lettuce.

[LABEL] contradiction [PRED] contradiction [COEFF] 7.6725

[P] A man and a woman sitting next to a black fence talking.

[H] Two people are punching each other.

[LABEL] neutral [PRED] contradiction [COEFF] 7.6517

[P] A person wearing glasses is prepped for some kind of dental work.

[H] A man is crying with pain

[LABEL] contradiction [PRED] contradiction [COEFF] 7.6300

[P] Two people, a man and a woman hold signs during a protest that is against censoring artists.

[H] Two people rolling in fire

[LABEL] contradiction [PRED] contradiction [COEFF] 7.5464

[P] People are in a laundry mat washing clothes.

[H] People are throwing their clothes in the garbage.

[LABEL] contradiction [PRED] contradiction [COEFF] 6.9941

[P] A man in a blue and white shirt shows concern for a girl in a suv.

[H] A man running on the ground

[LABEL] contradiction [PRED] contradiction [COEFF] 6.9487

[P] A crowd of people watching as a large statue of a man is being moved.

[H] A crowd of people watch a building being demolished.

[LABEL] contradiction [PRED] contradiction [COEFF] 6.9152

[P] Three people walking on a trail in the middle of the day.

[H] A man is crushed by a red vehicle.

[LABEL] contradiction [PRED] contradiction [COEFF] 6.9031

[P] Fans watching a basketball game indoors at a stadium.

[H] A crowd of people protest by a governmental building.

[LABEL] contradiction [PRED] contradiction [COEFF] 6.6235

[P] Man on a makeshift scaffolding, fixing a window.

[H] A guy falls out a window.

[LABEL] contradiction [PRED] contradiction [COEFF] 6.6060

[P] A rollerblader is performing a trick on a ramp.

[H] The rollerblader is on the ground bleeding.

[LABEL] contradiction [PRED] contradiction [COEFF] 6.5845

[P] 3 people ( 2 male 1 female ) are replacing the wood chips at a playground, using wheelbarrows.

[H] 3 people are stealing wood chips in order to sell them on the black market

[LABEL] contradiction [PRED] contradiction [COEFF] 6.4837

[P] Two men smoking behind a railing.

[H] Two old men are drinking.

## 1.478 Component 477

[LABEL] contradiction [PRED] contradiction [COEFF] 12.6699

[P] A group of girls are enjoying a parade.

[H] A group of girls is sitting on the couch playing with a puppy

[LABEL] contradiction [PRED] contradiction [COEFF] 10.6000

[P] A child wearing a blue shirt is jumping in the air.

[H] A child is sitting on her dog.

[LABEL] contradiction [PRED] contradiction [COEFF] 10.5963

[P] Three men are dancing while the band plays and others enjoy the entertainment.

[H] Three men are climbing a rock wall.

[LABEL] contradiction [PRED] contradiction [COEFF] 9.9772

[P] A man and a woman are dancing with their hair up.

[H] A man and woman are sitting in chairs.

[LABEL] **contradiction** [PRED] **contradiction** [COEFF] 9.9555  
[P] Three young men are celebrating together in public.  
[H] Two cowboys ride across a hill with the sunset in front of them.

[LABEL] **contradiction** [PRED] **contradiction** [COEFF] 9.9272  
[P] The happy bride and groom waited for the photographer to take their picture.  
[H] The bride is crying inside of the bathroom stall.

[LABEL] **contradiction** [PRED] **contradiction** [COEFF] 9.7191  
[P] A child in red pants leaping in the air  
[H] The child is crawling in the sandbox.

[LABEL] **contradiction** [PRED] **contradiction** [COEFF] 9.6928  
[P] Two young asian girls dressed in some sort of green and yellow clothing dance together.  
[H] A couple of young girls are working on a project at a table.

[LABEL] **contradiction** [PRED] **contradiction** [COEFF] 9.5322  
[P] A couple is sharing an embrace and a smile.  
[H] Dog chasing frog

[LABEL] **contradiction** [PRED] **contradiction** [COEFF] 9.2602  
[P] A young child chasing a bird.  
[H] A child is swimming in a pool.

[LABEL] **contradiction** [PRED] **contradiction** [COEFF] 9.0882  
[P] Girl in colorful top and high heels dancing  
[H] A girl doing yoga.

[LABEL] **contradiction** [PRED] **contradiction** [COEFF] 8.9297  
[P] Two fellow soccer players are running towards the ball on a soccer field.  
[H] A bird is pooping on the sidewalk.

[LABEL] **contradiction** [PRED] **contradiction** [COEFF] 8.9124  
[P] Three young asian women laugh.  
[H] Three women knitting socks

[LABEL] **neutral** [PRED] **contradiction** [COEFF] 8.7922  
[P] Two ladies dancing with others watching.  
[H] There are two people outside running in the field

[LABEL] **contradiction** [PRED] **contradiction** [COEFF] 8.3041  
[P] Two people, one with a rainbow wig, wave out the window of a limo.  
[H] Two people are jogging.

[LABEL] **contradiction** [PRED] **contradiction** [COEFF] 8.2898  
[P] The boy is playing with a colorful ribbon.

[H] Boy eating ice cream to beat the heat

## 1.479 Component 478

[LABEL] **entailment** [PRED] **entailment** [COEFF] 41.8182

[P] Children are playing at the playground.

[H] Some children are playing.

[LABEL] **entailment** [PRED] **entailment** [COEFF] 41.1264

[P] Four people are standing in sandy area near a green bench.

[H] Some people are standing near a bench.

[LABEL] **entailment** [PRED] **entailment** [COEFF] 39.7049

[P] Four men ride on the back of a dump truck.

[H] Some men are riding on the back of a dump truck

[LABEL] **neutral** [PRED] **entailment** [COEFF] 38.5178

[P] Two dogs play with one another on the lawn.

[H] Some dogs are playing.

[LABEL] **entailment** [PRED] **entailment** [COEFF] 36.8410

[P] Two small children standing on a walkway next to pavement.

[H] Some children are standing on a walkway

[LABEL] **entailment** [PRED] **entailment** [COEFF] 33.7813

[P] Women sitting on bench in large sombreros.

[H] Some women are sitting

[LABEL] **entailment** [PRED] **entailment** [COEFF] 33.6111

[P] Two kids are skateboarding.

[H] Some kids are on skateboards.

[LABEL] **neutral** [PRED] **entailment** [COEFF] 31.5400

[P] Two white dogs are laying in the doorway of a wooden floored apartment.

[H] Some dogs are laying in the doorway of a wooden floored apartment.

[LABEL] **entailment** [PRED] **entailment** [COEFF] 31.4030

[P] Three dogs racing madly around a racetrack.

[H] Some dogs are running.

[LABEL] **entailment** [PRED] **entailment** [COEFF] 31.3207

[P] Three girls sitting on a dock splash their feet in water while two of them hold drinks.

[H] Some girls are sitting on the dock.

[LABEL] **entailment** [PRED] **entailment** [COEFF] 31.2088

[P] Three girls help lay a roof on a newly constructed building.

[H] Some girls help lay a roof on a newly constructed building.

[LABEL] **entailment** [PRED] **entailment** [COEFF] 31.1442

[P] Four people are singing karaoke.

[H] Some people are singing.

[LABEL] **entailment** [PRED] **entailment** [COEFF] 30.9570

[P] Black dogs jump in pool to a hand.

[H] Some dogs jump into a pool.

[LABEL] **entailment** [PRED] **entailment** [COEFF] 30.2274

[P] Two people sitting and looking at the water.

[H] Some people are looking at water.

[LABEL] **entailment** [PRED] **entailment** [COEFF] 30.0221

[P] Asian little kids in a school waiting for a teacher.

[H] Some asian kids are waiting for a teacher.

[LABEL] **entailment** [PRED] **entailment** [COEFF] 28.8572

[P] Young boys in orange life vests sit on a raft.

[H] Some boys on a raft.

## 1.480 Component 479

[LABEL] **entailment** [PRED] **entailment** [COEFF] 60.5511

[P] A man playing soccer is on the ground picking up the ball from the field while the game is in play.

[H] There are people near a soccer ball.

[LABEL] **entailment** [PRED] **entailment** [COEFF] 60.3679

[P] A woman swings a boy around outside a building.

[H] The people are outside.

[LABEL] **entailment** [PRED] **entailment** [COEFF] 60.2381

[P] High in the sky a motocross driver is performing an acrobatic stunt at an event while the stands and track are in the background.

[H] There are people at the motocross event.

[LABEL] **entailment** [PRED] **entailment** [COEFF] 59.6785

[P] A woman wearing a red cloth on her head passes in front of a blue shack while as she walks down the street.

[H] People on the street.

[LABEL] **entailment** [PRED] **entailment** [COEFF] 56.7532

[P] A lady naps with a child on a sandy beach area.

[H] People are at the beach.

[LABEL] **entailment** [PRED] **entailment** [COEFF] 55.0344



[P] A woman and girl sit in a forest creek bed.

[H] There are people in the woods.

[LABEL] **entailment** [PRED] **entailment** [COEFF] 54.0038

[P] A group of four children cross the street, as an adult looks down the street.

[H] There are people on the street.

[LABEL] **entailment** [PRED] **entailment** [COEFF] 53.3964

[P] A man and a child are at the water's edge.

[H] There are people by the water.

[LABEL] **entailment** [PRED] **entailment** [COEFF] 52.8736

[P] Two young boys are playing in water.

[H] People are in the water.

[LABEL] **entailment** [PRED] **entailment** [COEFF] 52.7628

[P] A man accompanies his grandmother on the bus.

[H] There are people on a bus.

[LABEL] **entailment** [PRED] **entailment** [COEFF] 52.3388

[P] A baby has fallen asleep in his chair while sitting in front of the laundry machines.

[H] People are in the laundry room

[LABEL] **entailment** [PRED] **entailment** [COEFF] 52.2054

[P] Two men are walking down a wet alleyway.

[H] There are people outside.

[LABEL] **entailment** [PRED] **entailment** [COEFF] 50.0392

[P] An asian woman, and a black male, walking past the stairs to the subway.

[H] There are people outside.

[LABEL] **entailment** [PRED] **entailment** [COEFF] 45.0573

[P] Two girls walking in the ocean.

[H] There are people in the ocean

[LABEL] **entailment** [PRED] **neutral** [COEFF] 44.3091

[P] A woman holds a toddler.

[H] There are people here.

[LABEL] **entailment** [PRED] **entailment** [COEFF] 42.6003

[P] A man and child wearing a yellow life vest look up from the water.

[H] People are in the water.

## 1.481 Component 480

[LABEL] **contradiction** [PRED] **contradiction** [COEFF] 30.8803

[P] A man is shoveling dirt and wearing a construction helmet.

[H] A woman is shoveling dirt.

[LABEL] contradiction [PRED] contradiction [COEFF] 27.4759

[P] A man is lighting a smoke outside of a building.

[H] A woman is lighting a smoke outside of a building.

[LABEL] contradiction [PRED] contradiction [COEFF] 26.4946

[P] A man looks sits on a field among other people.

[H] A woman looks sits on a field among other people.

[LABEL] contradiction [PRED] contradiction [COEFF] 25.4041

[P] A man is walking up some stairs.

[H] A woman is walking up some stairs.

[LABEL] contradiction [PRED] contradiction [COEFF] 24.3437

[P] A man is bowling with various national flags displayed at the opposite end on the bowling alley.

[H] A woman is bowling.

[LABEL] contradiction [PRED] contradiction [COEFF] 24.0650

[P] A man on a ladder repairs the roof of a building.

[H] A woman on a ladder repairs the floor.

[LABEL] contradiction [PRED] contradiction [COEFF] 23.1296

[P] A man steps out of a blue porta potty.

[H] A woman steps out of a blue porta potty.

[LABEL] contradiction [PRED] contradiction [COEFF] 22.7374

[P] A man shows off his exhibit to many people.

[H] A woman shows off her exhibit

[LABEL] contradiction [PRED] contradiction [COEFF] 21.8096

[P] A man practicing karate moves in the air.

[H] A woman is practicing karate moves.

[LABEL] contradiction [PRED] contradiction [COEFF] 20.7282

[P] A man is playing an accordion near the water.

[H] A woman plays violin near a lake.

[LABEL] contradiction [PRED] contradiction [COEFF] 19.7682

[P] A man throws a green frisbee in a park.

[H] A woman catches a frisbee in her mouth.

[LABEL] contradiction [PRED] contradiction [COEFF] 18.7879

[P] A man holds and looks at a product at a grocery store.

[H] A woman holds and looks at a product at a grocery store.

[LABEL] contradiction [PRED] contradiction [COEFF] 18.6942  
[P] A man is carrying a board with many pairs of sunglasses.  
[H] A woman is crocheting

[LABEL] contradiction [PRED] contradiction [COEFF] 18.1977  
[P] A man is a kitchen cooking.  
[H] A woman is cooking in the living room.

[LABEL] contradiction [PRED] contradiction [COEFF] 18.1081  
[P] A man is looking out of a window.  
[H] A woman is looking out of a window.

[LABEL] contradiction [PRED] contradiction [COEFF] 17.4650  
[P] A man is waiting for his food to come.  
[H] A woman drinks a beer.

## 1.482 Component 481

[LABEL] entailment [PRED] entailment [COEFF] 41.0517  
[P] A man asleep on a subway car.  
[H] A man is sleeping.

[LABEL] neutral [PRED] entailment [COEFF] 36.5724  
[P] This man is asleep on a bench.  
[H] The man is asleep

[LABEL] entailment [PRED] entailment [COEFF] 36.3514  
[P] The young woman is sleeping in her room.  
[H] The young lady is sleeping

[LABEL] entailment [PRED] entailment [COEFF] 34.2227  
[P] A little boy is sleeping on a brown chair.  
[H] A boy is asleep.

[LABEL] entailment [PRED] entailment [COEFF] 30.8747  
[P] The man wearing all black is asleep on his red motorcycle.  
[H] The person is sleeping.

[LABEL] entailment [PRED] entailment [COEFF] 29.2737  
[P] An older, balding man falling asleep on a chair in front of bookshelves.  
[H] A bald man is sleeping

[LABEL] entailment [PRED] entailment [COEFF] 29.0378  
[P] A baby girl is asleep on someone's shoulder.  
[H] A baby is asleep

[LABEL] **entailment** [PRED] **entailment** [COEFF] 28.2738  
[P] A man in a black jacket asleep with his head on the table.  
[H] A man is sleeping.

[LABEL] **entailment** [PRED] **entailment** [COEFF] 25.6992  
[P] A tired man is sleeping on his motorcycle on the side of the road.  
[H] A man is sleeping.

[LABEL] **entailment** [PRED] **entailment** [COEFF] 24.5424  
[P] A man with a black shirt that says " genetic freak " is sleeping on a bus.  
[H] A man is sleeping.

[LABEL] **entailment** [PRED] **entailment** [COEFF] 22.4040  
[P] A man in a checkered shirt and white sandals is asleep while reading the paper.  
[H] A man is sleeping.

[LABEL] **entailment** [PRED] **entailment** [COEFF] 19.9971  
[P] An older man with a beard wearing several coats, a pair of gloves, and a hat, sleeps on some grass.  
[H] An old man sleeps.

[LABEL] **entailment** [PRED] **entailment** [COEFF] 19.9546  
[P] A view through a door into a small tiled room where a man and two children are asleep on the floor.  
[H] Two children are sleeping.

[LABEL] **neutral** [PRED] **entailment** [COEFF] 19.8611  
[P] A man sleep in a chair next to a roll of toilet paper.  
[H] The guy is near toilet paper and is asleep.

[LABEL] **entailment** [PRED] **entailment** [COEFF] 19.0793  
[P] A man is sleeping on his front doorstep.  
[H] The man slept on the doorstep.

[LABEL] **entailment** [PRED] **entailment** [COEFF] 18.9723  
[P] Two young boys are asleep on a brown carpeted floor.  
[H] Two young boys are asleep.

### 1.483 Component 482

[LABEL] **contradiction** [PRED] **contradiction** [COEFF] 16.6175  
[P] A man standing in a green box.  
[H] The man is sitting in a chair.

[LABEL] **contradiction** [PRED] **contradiction** [COEFF] 11.4673  
[P] Two people are in a lift on the outside of a tall building.  
[H] The two people are sitting at a table.

[LABEL] contradiction [PRED] contradiction [COEFF] 11.3842  
[P] Three people are hiking through a snow ridden light forest.  
[H] The people are sitting at a a table.

[LABEL] contradiction [PRED] contradiction [COEFF] 11.1710  
[P] An asian man wearing a black jacket is reading a newspaper in front of a store.  
[H] The asian man is inside sitting at a table.

[LABEL] contradiction [PRED] contradiction [COEFF] 9.9253  
[P] A young girl with goggles is floating in the pool.  
[H] The young girl is sitting in a chair on the beach.

[LABEL] contradiction [PRED] contradiction [COEFF] 9.2904  
[P] Male painter climbing a scaffold being set up by a building.  
[H] A man is sitting in a chair.

[LABEL] contradiction [PRED] contradiction [COEFF] 8.9494  
[P] A group of people wearing trench coats perform on stage.  
[H] People are sitting on a couch.

[LABEL] contradiction [PRED] contradiction [COEFF] 8.8801  
[P] A man in a store jumping across a shopping cart  
[H] A man is sitting in a chair.

[LABEL] contradiction [PRED] contradiction [COEFF] 8.6413  
[P] A man is standing against a light pole next to a trashcan with a bus in the background.  
[H] The man is sitting on the bench.

[LABEL] contradiction [PRED] contradiction [COEFF] 7.9975  
[P] A man in a suit walks in front of a colorful mural.  
[H] A man in a suit sitting in a chair

[LABEL] contradiction [PRED] contradiction [COEFF] 7.8284  
[P] A bmx rider does a trick against a graffiti covered wall.  
[H] The bike rider is sitting on a chair.

[LABEL] contradiction [PRED] contradiction [COEFF] 7.6373  
[P] A woman in a white and tan striped dress sits in the lap of a man with a tan collared shirt.  
[H] The woman is sitting on a stool.

[LABEL] contradiction [PRED] contradiction [COEFF] 7.4689  
[P] A man standing next an older silver van.  
[H] A man is sitting in a cafe.

[LABEL] contradiction [PRED] contradiction [COEFF] 7.1925  
[P] Two little children, one boy and one girl, laugh as they sit on the grass.

[H] The children are inside at a table.

[LABEL] **contradiction** [PRED] **contradiction** [COEFF] 7.1188

[P] Two men are riding down the street on a bicycle next to a gray building.

[H] Two men are sitting in a cafe drinking coffee.

[LABEL] **contradiction** [PRED] **contradiction** [COEFF] 7.0951

[P] Two laborers are working on a roof with a bright blue sky in the background.

[H] Two people are sitting on a couch.

## 1.484 Component 483

[LABEL] **entailment** [PRED] **entailment** [COEFF] 24.7183

[P] Two men with their bodies, clothes, and hair dyed stand performing.

[H] The men are performing

[LABEL] **entailment** [PRED] **entailment** [COEFF] 24.6332

[P] Two women walking down the side of the street.

[H] The women are walking

[LABEL] **contradiction** [PRED] **entailment** [COEFF] 24.4362

[P] A young hispanic girl is cutting up some artwork that she has drawn.

[H] The hispanic girl is drawing

[LABEL] **neutral** [PRED] **entailment** [COEFF] 23.9916

[P] Two men in medieval costumes have kites on strings in a town square.

[H] The men have kites

[LABEL] **neutral** [PRED] **entailment** [COEFF] 22.4111

[P] Three men, from two teams, are in the air colliding and there is a soccer ball above them.

[H] The men are air colliding

[LABEL] **entailment** [PRED] **entailment** [COEFF] 21.9421

[P] Two white dogs running in a field

[H] The dogs are running

[LABEL] **neutral** [PRED] **entailment** [COEFF] 21.4622

[P] Two people who are wearing coat are taking their food in a restaurant.

[H] The people are at the restaurant

[LABEL] **entailment** [PRED] **entailment** [COEFF] 19.1562

[P] Three people wearing glasses pose for a picture.

[H] The people are wearing glasses

[LABEL] **entailment** [PRED] **entailment** [COEFF] 19.0320

[P] Young girls in brown and white uniforms are shouting and performing an exercise.

[H] The girls are shouting

[LABEL] **neutral** [PRED] **entailment** [COEFF] 18.1053

[P] Many marathon runners on a stretch of path in a wintry park.

[H] The runners are in the park

[LABEL] **entailment** [PRED] **entailment** [COEFF] 18.0594

[P] Two women with black hair are walking on the street, carrying a purple umbrella over their head.

[H] The women are walking

[LABEL] **entailment** [PRED] **entailment** [COEFF] 17.7793

[P] Two women are in a kitchen working together to load the dishwasher.

[H] The women are loading the dishwasher.

[LABEL] **entailment** [PRED] **entailment** [COEFF] 17.7288

[P] A group of men sit around a table playing cards and drinking.

[H] The men are drinking

[LABEL] **entailment** [PRED] **entailment** [COEFF] 17.5891

[P] A bunch of people with umbrellas walking outside of a farmers market.

[H] The people have umbrellas

[LABEL] **entailment** [PRED] **neutral** [COEFF] 17.5553

[P] Asian school children presenting a group project together.

[H] The children were together

[LABEL] **neutral** [PRED] **neutral** [COEFF] 17.0583

[P] Three men conducting a train in asia.

[H] The men are conducting

## 1.485 Component 484

[LABEL] **entailment** [PRED] **entailment** [COEFF] 23.1374

[P] A man is standing by a fruit cart.

[H] A person is standing by a fruit cart.

[LABEL] **entailment** [PRED] **entailment** [COEFF] 21.2072

[P] A man is sitting at a table, working with a machine of some sort.

[H] A person is sitting.

[LABEL] **entailment** [PRED] **entailment** [COEFF] 20.8740

[P] A man is hugging a lady in front of a heineke display.

[H] A person is hugging a lady in front of a heineke display.

[LABEL] **entailment** [PRED] **entailment** [COEFF] 17.5987

[P] A man chopping something with a knife on a table.

[H] A person using a knife.

[LABEL] **entailment** [PRED] **entailment** [COEFF] 16.3888

[P] The kid is sliding down a tan plastic slide.

[H] A person is sliding down a slide.

[LABEL] **entailment** [PRED] **entailment** [COEFF] 15.9090

[P] A man checking food on a grill.

[H] A person checks on the food.

[LABEL] **entailment** [PRED] **entailment** [COEFF] 15.5022

[P] A man is playing a violin on a stage.

[H] A person is on stage

[LABEL] **entailment** [PRED] **entailment** [COEFF] 15.0683

[P] A man holding giving a lecture.

[H] A person gives a lecture.

[LABEL] **entailment** [PRED] **entailment** [COEFF] 14.9165

[P] A boy in a halloween costume.

[H] A person in a halloween costume.

[LABEL] **entailment** [PRED] **entailment** [COEFF] 14.8159

[P] The man is giving a presentation on a smart board.

[H] A person gives a presentation.

[LABEL] **entailment** [PRED] **entailment** [COEFF] 14.6058

[P] A man wearing an orange shirt and glasses is sitting outside reading a book.

[H] A person is sitting outside.

[LABEL] **entailment** [PRED] **entailment** [COEFF] 14.4840

[P] A man performs a trick on his mini - race car, with one leg flying out in the sky.

[H] A person performs a trick on his mini - race car, with one leg flying out in the sky.

[LABEL] **neutral** [PRED] **entailment** [COEFF] 14.2762

[P] A man is skateboarding at a park.

[H] A person is skateboarding at a park.

[LABEL] **entailment** [PRED] **entailment** [COEFF] 14.1043

[P] A man is sitting on door steps in front of a house.

[H] A person is sitting on door steps in front of a house.

[LABEL] **entailment** [PRED] **entailment** [COEFF] 13.7316

[P] A worker man hanging from a stack of metal bars.

[H] A person hanging from metal bars.

[LABEL] **entailment** [PRED] **entailment** [COEFF] 13.5517



[P] A crowd watching a man riding a unicycle with fire sticks in his hand.  
[H] A person riding a unicycle.

## 1.486 Component 485

[LABEL] **contradiction** [PRED] **contradiction** [COEFF] 39.8585

[P] A child with a red life vest and blue goggles swimming in a pool.

[H] A man swims in a pool.

[LABEL] **contradiction** [PRED] **contradiction** [COEFF] 34.7465

[P] Two kids are taking a bath with an umbrella.

[H] A man is taking a bath.

[LABEL] **contradiction** [PRED] **contradiction** [COEFF] 27.5300

[P] This child is having a photo posing.

[H] This man is having a photo posing.

[LABEL] **contradiction** [PRED] **contradiction** [COEFF] 26.7074

[P] A child playing on a plastic horse.

[H] A man playing on a plastic horse.

[LABEL] **contradiction** [PRED] **contradiction** [COEFF] 24.8598

[P] A child wearing bluish baggy shorts and shirt with a striped baseball hat, taking a picture with a camera placed on tripod stand in a grassy mountainous region.

[H] A man wearing baggy shorts is taking a picture of a desert.

[LABEL] **contradiction** [PRED] **contradiction** [COEFF] 24.4929

[P] Two kids building a sand castle

[H] Two men building a sand castle

[LABEL] **contradiction** [PRED] **contradiction** [COEFF] 20.7270

[P] Children laugh and smile.

[H] Two men laugh and smile.

[LABEL] **contradiction** [PRED] **contradiction** [COEFF] 20.5804

[P] Three children in a field, looking up at the sky.

[H] Three men in a field, looking up at the sky.

[LABEL] **contradiction** [PRED] **contradiction** [COEFF] 19.6961

[P] A children's choir are in blue and red robes.

[H] An old man's choir in blue and green.

[LABEL] **contradiction** [PRED] **contradiction** [COEFF] 18.6135

[P] Young child using tools on a machine.

[H] Young man using tools on a machine.

[LABEL] **contradiction** [PRED] **contradiction** [COEFF] 17.5229  
 [P] A cute baby is playing with someone's cellphone.  
 [H] A man is making a phone call.

[LABEL] **contradiction** [PRED] **contradiction** [COEFF] 16.5333  
 [P] Child running on a sidewalk.  
 [H] An old man going down a path in the sun.

[LABEL] **contradiction** [PRED] **contradiction** [COEFF] 16.2926  
 [P] A woman holding up a mirror to a child with a painted face at a busy event.  
 [H] A woman holds up a mirror to a man with a henna tattoo.

[LABEL] **contradiction** [PRED] **contradiction** [COEFF] 15.8193  
 [P] A child walks next to a woman down a park path.  
 [H] A man is jogging.

[LABEL] **contradiction** [PRED] **contradiction** [COEFF] 15.8151  
 [P] A child being splashed by a water fountain.  
 [H] A man is splashed at a fountain by his wife.

[LABEL] **contradiction** [PRED] **contradiction** [COEFF] 15.2316  
 [P] Two children smile while the third sticks out their tongue.  
 [H] Two men smile while the third sticks out their tongue.

## 1.487 Component 486

[LABEL] **entailment** [PRED] **entailment** [COEFF] 5.9910  
 [P] There are people gathered outside holding flags.  
 [H] People are holding flags.

[LABEL] **entailment** [PRED] **entailment** [COEFF] 5.6110  
 [P] Two cars are racing on a track while the audience watches from behind a fence.  
 [H] Two cars are on the track.

[LABEL] **entailment** [PRED] **entailment** [COEFF] 5.3534  
 [P] A group of children dance and play instruments under colored lights.  
 [H] A group of children are dancing.

[LABEL] **entailment** [PRED] **entailment** [COEFF] 5.3441  
 [P] An event in which stands have been erected and large group of people are attracted takes place outside.  
 [H] A large group of people are outside.

[LABEL] **entailment** [PRED] **entailment** [COEFF] 5.3225  
 [P] People are marching in a parade while beating drums and playing instruments.  
 [H] People are marching in a parade.

[LABEL] entailment [PRED] entailment [COEFF] 5.3175  
[P] Two teams are playing soccer in a large stadium that is filled with spectators.  
[H] There is a stadium full of people.

[LABEL] entailment [PRED] entailment [COEFF] 5.2638  
[P] A crowd of people are in a cafe.  
[H] People are at a cafe.

[LABEL] entailment [PRED] entailment [COEFF] 5.2457  
[P] People hanging out on the beach in bathing suits and relaxing clothing.  
[H] People are at the beach.

[LABEL] entailment [PRED] entailment [COEFF] 5.1486  
[P] People are standing on the sidewalk of a street.  
[H] People are on the sidewalk.

[LABEL] entailment [PRED] entailment [COEFF] 4.9944  
[P] A group of ladies stand outside with umbrellas.  
[H] A bunch of ladies are outside.

[LABEL] entailment [PRED] entailment [COEFF] 4.9926  
[P] A stunt biker leaps into the air beside the setting sun.  
[H] A stunt biker is in the air.

[LABEL] entailment [PRED] entailment [COEFF] 4.6642  
[P] A line of people is forming in front of a tent that appears to be closed to the public.  
[H] People are standing in line.

[LABEL] entailment [PRED] entailment [COEFF] 4.5779  
[P] A sidewalk that is in a busy mood.  
[H] A sidewalk that is busy.

[LABEL] entailment [PRED] entailment [COEFF] 4.5702  
[P] Four children are playing together outside.  
[H] Four kids are outside.

[LABEL] entailment [PRED] entailment [COEFF] 4.5381  
[P] A crowd of people is setting outside watching a performance.  
[H] People are watching a performance.

[LABEL] entailment [PRED] entailment [COEFF] 4.5225  
[P] People are sitting at tables in the dark nearby a lit fire.  
[H] People are sitting near a fire.

## 1.488 Component 487

[LABEL] **neutral** [PRED] **neutral** [COEFF] 22.3015

[P] A little girl is climbing up a climbing wall

[H] A little girl is climbing up a climbing wall in order to meet her father at the top

[LABEL] **neutral** [PRED] **neutral** [COEFF] 20.3108

[P] A skinny shirtless indian boy wearing shorts is jumping to the lake.

[H] A skinny shirtless indian boy wearing shorts is jumping to the lake to save his friend.

[LABEL] **neutral** [PRED] **neutral** [COEFF] 19.4217

[P] A group of young boys fight over a bag of trash.

[H] A group of young boys fight over a bag of trash because they think it might have treasure inside.

[LABEL] **neutral** [PRED] **neutral** [COEFF] 19.0302

[P] An elderly woman selling rice on the street corner.

[H] An elderly woman is selling rice on the corner to fund her trip to las vegas

[LABEL] **neutral** [PRED] **neutral** [COEFF] 18.5037

[P] A girl running home from school.

[H] A girl is running home from school to show her mom her report card.

[LABEL] **neutral** [PRED] **neutral** [COEFF] 17.0140

[P] A little girl is climbing a ladder.

[H] A little girl is climbing a ladder to escape a fire.

[LABEL] **neutral** [PRED] **neutral** [COEFF] 16.1110

[P] A black and white spotted dog is circling a gray and white dog.

[H] A black and white spotted dog is circling a gray and white dog to scare it from coming towards his way and eat his food

[LABEL] **neutral** [PRED] **neutral** [COEFF] 16.0565

[P] A man is sitting while he reads the times sport newspaper.

[H] A man reads the sports newspaper to see if his favorite team won last night.

[LABEL] **neutral** [PRED] **neutral** [COEFF] 15.9370

[P] A little girl learning to dance.

[H] A little girl is learning to dance in preparation for a musical that she will be auditioning for.

[LABEL] **neutral** [PRED] **neutral** [COEFF] 15.4608

[P] An attractive young woman in a blue jacket walks around a train station.

[H] An attractive young woman in a blue jacket walks around a train station searching for her lost purse.

[LABEL] **neutral** [PRED] **neutral** [COEFF] 15.1890

[P] A boy in a white shirt is sitting in a chair at a fruit stand.

[H] A boy hopes to sell fruit to pay for college

[LABEL] **neutral** [PRED] **neutral** [COEFF] 15.1368

[P] A young child in a red shirt and green pants vacuums the floor in front of an oven in a kitchen.  
[H] The child is vacuuming because he spilled some juice.

[LABEL] **neutral**            [PRED] **neutral**            [COEFF] 14.9214  
[P] Two people swimming on a floating while a black dog follows.  
[H] Two people swimming on a floating while a black dog follows hoping to get to play with them.

[LABEL] **neutral**            [PRED] **neutral**            [COEFF] 14.8351  
[P] A dog bites another dog's neck.  
[H] One dog is biting the other dog because he is angry.

[LABEL] **neutral**            [PRED] **neutral**            [COEFF] 14.4558  
[P] Man stands outside a storefront.  
[H] A man is standing outside of a store waiting for his wife to finish shopping.

[LABEL] **neutral**            [PRED] **neutral**            [COEFF] 14.3349  
[P] A man is standing on a step stool.  
[H] A man is standing on a stool, hiding from the mouse.

## 1.489 Component 488

[LABEL] **entailment**        [PRED] **entailment**        [COEFF] 20.7814  
[P] A bronze street performer pretends to make a movie while a confused boy watches.  
[H] A boy is watching a street performer.

[LABEL] **entailment**        [PRED] **entailment**        [COEFF] 19.1612  
[P] A woman in a market gestures to a hat, while a child reaches for the hat.  
[H] A child reaches for a hat.

[LABEL] **entailment**        [PRED] **entailment**        [COEFF] 18.0236  
[P] The boys are having a night out from homework ; some are at the table while two are sleeping.  
[H] Two boys are sleeping.

[LABEL] **entailment**        [PRED] **entailment**        [COEFF] 16.8256  
[P] A scientist wears latex gloves while handling samples and scientific equipment behind a glass shield.  
[H] A scientist is handling samples.

[LABEL] **entailment**        [PRED] **entailment**        [COEFF] 15.5040  
[P] A woman writing the alphabet on a chalkboard while carrying a sleeping baby on her back.  
[H] A woman is carrying a baby.

[LABEL] **entailment**        [PRED] **entailment**        [COEFF] 14.8969  
[P] People sitting on a lower level of a walkway, while a different person is walking above them among the trees.  
[H] People are sitting on a walkway.

[LABEL] **entailment** [PRED] **entailment** [COEFF] 14.5529  
[P] A man helps a young girl ride a scooter with a red bow on it.  
[H] A girl is riding a scooter.

[LABEL] **entailment** [PRED] **entailment** [COEFF] 14.0731  
[P] A lady buying colorful spools of yarn from another lady.  
[H] The lady is buying yarn.

[LABEL] **entailment** [PRED] **entailment** [COEFF] 14.0246  
[P] One man climbing a rock wall while another man is below.  
[H] A man climbs a rock wall.

[LABEL] **entailment** [PRED] **entailment** [COEFF] 13.6432  
[P] A blond baby is watching a dark - haired baby chew on a blue toy.  
[H] A baby is chewing on a toy.

[LABEL] **entailment** [PRED] **entailment** [COEFF] 12.8994  
[P] One man is holding a dumpster door open while another man puts a trash bag in the dumpster.  
[H] A man puts trash into a dumpster.

[LABEL] **entailment** [PRED] **entailment** [COEFF] 12.4951  
[P] A woman with glasses reads a paper while a guy with glasses in a blue shirt looks on.  
[H] A woman is reading the paper.

[LABEL] **entailment** [PRED] **entailment** [COEFF] 11.6724  
[P] A woman wears earbuds while working on a laptop on a table.  
[H] A woman is working on a laptop.

[LABEL] **entailment** [PRED] **entailment** [COEFF] 11.4571  
[P] A person drives around a futuristic looking vehicle while a man approaches her and a crowd watches.  
[H] A person is driving.

[LABEL] **neutral** [PRED] **entailment** [COEFF] 11.3807  
[P] A woman in a tank - top, cutting another woman's clothing.  
[H] A woman is cutting clothes.

[LABEL] **entailment** [PRED] **entailment** [COEFF] 11.3235  
[P] Two men with scrubbers wash a building.  
[H] Men are washing the building.

## 1.490 Component 489

[LABEL] **contradiction** [PRED] **contradiction** [COEFF] 13.3538  
[P] A group of girls are cheering.  
[H] A group of people are mourning.

[LABEL] contradiction [PRED] contradiction [COEFF] 11.0410  
[P] A firefighter is looking at a space underneath the street.  
[H] The people are at the movies.

[LABEL] contradiction [PRED] contradiction [COEFF] 11.0229  
[P] A slender man wearing rolled pants and a striped white and blue shirt walks on sand.  
[H] The man is very fat.

[LABEL] contradiction [PRED] contradiction [COEFF] 10.5369  
[P] Man with backpack hanging a sign on a pole in a lobby.  
[H] The man is eating a hamburger in the lobby.

[LABEL] contradiction [PRED] contradiction [COEFF] 10.2892  
[P] Young man with cap and buttoned coat stands before building.  
[H] The young man is in shorts and a t - shirt while mowing the lawn

[LABEL] contradiction [PRED] contradiction [COEFF] 9.7947  
[P] A college guy is on his laptop and wondering and thinking.  
[H] A college student is using her laptop.

[LABEL] contradiction [PRED] contradiction [COEFF] 9.4514  
[P] A tribal african man with an assault rifle stands next to a tribal african woman.  
[H] The man is holding an apple.

[LABEL] contradiction [PRED] contradiction [COEFF] 9.1081  
[P] Man in camouflage shorts bending over red and black air compressor.  
[H] A women is sitting near the air compressor.

[LABEL] contradiction [PRED] contradiction [COEFF] 9.0109  
[P] A man in a nice outfit stands in front of a band.  
[H] The man is wearing nasty, sloppy clothes.

[LABEL] contradiction [PRED] contradiction [COEFF] 8.9693  
[P] Several people on horseback carrying flags.  
[H] The people are walking on foot.

[LABEL] entailment [PRED] contradiction [COEFF] 8.9250  
[P] A group of people sitting outdoors.  
[H] The people are inside.

[LABEL] contradiction [PRED] contradiction [COEFF] 8.9185  
[P] Three young people planting flowers and covering the area with a tarp.  
[H] Three people are burying a body

[LABEL] contradiction [PRED] contradiction [COEFF] 8.8838  
[P] A woman taking her wallet out of her purse at a vendor stand.  
[H] The man pulls out a gun to rob the vendor stand.

[LABEL] **contradiction** [PRED] **contradiction** [COEFF] 8.7420  
[P] A man wearing a white jacket serves ice cream to several ladies from an igs street cart.  
[H] The man serving ice cream is wearing all black.

[LABEL] **contradiction** [PRED] **contradiction** [COEFF] 8.3815  
[P] An elderly woman is sitting down on the stone steps leading to impressive stonework.  
[H] The woman is very young.

[LABEL] **contradiction** [PRED] **contradiction** [COEFF] 8.2447  
[P] Africans out on the river fishing in their canoe for dinner.  
[H] People are eating turkey at the table.

### 1.491 Component 490

[LABEL] **contradiction** [PRED] **contradiction** [COEFF] 5.9530  
[P] A female athlete is racing ahead in a jogging suit and tennis shoes.  
[H] The female athlete is sitting.

[LABEL] **contradiction** [PRED] **contradiction** [COEFF] 4.8122  
[P] Two women compete in a kick - boxing match.  
[H] Two women are reading books.

[LABEL] **contradiction** [PRED] **contradiction** [COEFF] 4.5287  
[P] Women are standing next to a produce stand.  
[H] Woman resting in sofa

[LABEL] **contradiction** [PRED] **contradiction** [COEFF] 4.5004  
[P] Men with fireworks on street.  
[H] The men with fireworks are indoors.

[LABEL] **contradiction** [PRED] **contradiction** [COEFF] 4.2948  
[P] A woman in a park wearing a hat and holding a scarf over her face.  
[H] A woman is eating at home.

[LABEL] **contradiction** [PRED] **contradiction** [COEFF] 4.2194  
[P] Two males running, one wearing red and white, the other navy blue and black, outside on a cloudy day.  
[H] Two males sitting.

[LABEL] **contradiction** [PRED] **contradiction** [COEFF] 3.9542  
[P] A man stands in the rain outside swan restaurant.  
[H] The man is in the sunlight

[LABEL] **contradiction** [PRED] **contradiction** [COEFF] 3.8779  
[P] A black man with no shirt is carrying a torch in front of bedazzled elephants.  
[H] A black man is riding a bike



[LABEL] **contradiction** [PRED] **contradiction** [COEFF] 3.8435

[P] People gather outdoors at a market.

[H] The people are inside.

[LABEL] **entailment** [PRED] **contradiction** [COEFF] 3.7272

[P] A woman whose head is not visible walks in front of a bus with an advertisement on its side.

[H] A person is in front of an automobile.

[LABEL] **contradiction** [PRED] **contradiction** [COEFF] 3.7018

[P] Five young men playing rugby.

[H] Old men are talking about rugby.

[LABEL] **contradiction** [PRED] **contradiction** [COEFF] 3.6867

[P] Teenagers are looking out the window of a bus.

[H] Teenagers are at a field.

[LABEL] **contradiction** [PRED] **contradiction** [COEFF] 3.6355

[P] Family on beach looking at the ocean after a wedding.

[H] Family sitting inside after a funeral.

[LABEL] **contradiction** [PRED] **contradiction** [COEFF] 3.6214

[P] Children playing outside in a fountain.

[H] Children were playing in the snow.

[LABEL] **contradiction** [PRED] **contradiction** [COEFF] 3.5612

[P] Three girls pile on top of each other on the concrete.

[H] The girls are on grass.

[LABEL] **contradiction** [PRED] **contradiction** [COEFF] 3.5532

[P] Two women are sitting and looking in the same direction.

[H] Two women arm wrestle.

## 1.492 Component 491

[LABEL] **entailment** [PRED] **contradiction** [COEFF] 68.0118

[P] A little boy standing in very tall green grass.

[H] The boy is outside.

[LABEL] **entailment** [PRED] **contradiction** [COEFF] 67.2987

[P] A man and a woman are at a beach with other people nearby, and the woman is touching the man's face.

[H] The people are outside

[LABEL] **entailment** [PRED] **contradiction** [COEFF] 64.7555

[P] Two children are laughing in the grass.

[H] The children are outside

[LABEL] entailment [PRED] contradiction [COEFF] 64.7446  
[P] A young man is sitting on the grass fixing some kind of a sports net.  
[H] The man is outside

[LABEL] entailment [PRED] contradiction [COEFF] 62.8639  
[P] Three dogs playing and laying on the grass.  
[H] The dogs are outside.

[LABEL] entailment [PRED] contradiction [COEFF] 59.6336  
[P] A man in a red shirt and white sneakers lays in the grass beneath a tree.  
[H] The man is outside.

[LABEL] entailment [PRED] contradiction [COEFF] 59.3777  
[P] The child is playing in the leaves.  
[H] The child is outside

[LABEL] entailment [PRED] contradiction [COEFF] 58.4950  
[P] Two dogs running through high grass.  
[H] The two dogs are outside.

[LABEL] entailment [PRED] contradiction [COEFF] 55.5940  
[P] A man in a blue shirt hikes through a nature trail.  
[H] The man is outside.

[LABEL] entailment [PRED] contradiction [COEFF] 54.9737  
[P] A boy in a green shirt is kneeling on the grass looking through some sort of microscope.  
[H] The boy is outside.

[LABEL] entailment [PRED] contradiction [COEFF] 54.4716  
[P] A crowd of onlookers on a tractor ride watch a farmer hard at work in the field.  
[H] The onlookers are outside.

[LABEL] entailment [PRED] contradiction [COEFF] 53.9361  
[P] There are many people collected in a field.  
[H] The people are outside.

[LABEL] entailment [PRED] contradiction [COEFF] 52.4590  
[P] Two tan dogs play in the grass  
[H] The dogs are outside.

[LABEL] entailment [PRED] contradiction [COEFF] 52.2547  
[P] A young woman hikes her way up a wooded area surrounded by vegetation.  
[H] The woman is outside.

[LABEL] entailment [PRED] contradiction [COEFF] 51.2917  
[P] A man with a ring on his left ring finger was talking on a cellphone near the tables with blue umbrellas.

[H] The man is outside.

[LABEL] **neutral** [PRED] **contradiction** [COEFF] 49.7061

[P] A woman and a girl are playing together.

[H] The woman is outside.

### 1.493 Component 492

[LABEL] **contradiction** [PRED] **contradiction** [COEFF] 5.3514

[P] A lady in black pants, white t - shirt with red writing across breast, doing a stretch exercise on top of a concrete sphere with a 18th century building surrounding the sphere.

[H] A man sits lazily on a bench.

[LABEL] **contradiction** [PRED] **contradiction** [COEFF] 4.8742

[P] A woman in a black shirt works at a table selling jewelry.

[H] The man is selling jewelry

[LABEL] **contradiction** [PRED] **contradiction** [COEFF] 4.8443

[P] A woman in a pink shirt and jean skirt walking down the street talking on her cellphone.

[H] A man wearing sweatpants is standing on the side of the street, reading a newspaper.

[LABEL] **contradiction** [PRED] **contradiction** [COEFF] 4.4832

[P] A man with a black shirt is repairing a laptop.

[H] A woman is typing on her brand new laptop.

[LABEL] **contradiction** [PRED] **contradiction** [COEFF] 4.2984

[P] A young man standing in front of a red freight car holding a camera and taking a photo.

[H] A young woman is riding first class on a train to the orient.

[LABEL] **contradiction** [PRED] **contradiction** [COEFF] 3.8885

[P] Two women with white head garb and long dresses sitting in front of a door on steps reading and drinking a beverage.

[H] Two men are standing next to the door and drinking coffee.

[LABEL] **contradiction** [PRED] **contradiction** [COEFF] 3.8761

[P] A woman waiting at a coffee shop.

[H] A man walks by the coffee shop.

[LABEL] **contradiction** [PRED] **contradiction** [COEFF] 3.7344

[P] A woman in red overalls stands on sidewalk.

[H] A man in green dress waits for the bus.

[LABEL] **contradiction** [PRED] **contradiction** [COEFF] 3.7103

[P] A young woman in athletic gear is taking her bike on a stroll near a lake.

[H] A man is riding his bike along the lake.

[LABEL] **contradiction** [PRED] **contradiction** [COEFF] 3.6732

[P] A young girl lying down wearing a light purple top strokes the face of a crying infant  
[H] A man stares at a baby.

[LABEL] **contradiction** [PRED] **contradiction** [COEFF] 3.6457

[P] A man in a striped red polo shirt, tan khakis, and a nike visor is surrounded by a crowd of onlookers as he finishes a golf swing.

[H] The lady is trying to putt a gold ball through a clown's mouth.

[LABEL] **contradiction** [PRED] **contradiction** [COEFF] 3.6356

[P] Two girls dressed in warm clothes stand outside what appears to be a castle tourist attraction.

[H] Two guy huddle together.

[LABEL] **contradiction** [PRED] **contradiction** [COEFF] 3.6066

[P] A female tennis player hitting the ball

[H] The man is playing tennis.

[LABEL] **contradiction** [PRED] **contradiction** [COEFF] 3.5818

[P] A woman with flowers in her hair balances a large bowl of assorted fruits on her head.

[H] A guy is selling vegetables

[LABEL] **contradiction** [PRED] **contradiction** [COEFF] 3.5107

[P] A man is standing in the street next to a bale of hay and a wagon loaded down with packages.

[H] A woman is pulling a wagon with a child in it.

[LABEL] **contradiction** [PRED] **contradiction** [COEFF] 3.4905

[P] A girl standing in the ocean

[H] The boy is setting up his tent to go camping.

## 1.494 Component 493

[LABEL] **contradiction** [PRED] **contradiction** [COEFF] 6.7841

[P] A man holds a large stuffed lion toy.

[H] A man holds a ball.

[LABEL] **contradiction** [PRED] **contradiction** [COEFF] 6.6958

[P] A small child using an egg beater.

[H] A child is using a spatula

[LABEL] **contradiction** [PRED] **contradiction** [COEFF] 6.5282

[P] A man holds a card to his head.

[H] A man holding a gun to his head.

[LABEL] **contradiction** [PRED] **contradiction** [COEFF] 6.3411

[P] Boy eating a slice of pizza

[H] The boy is eating cake.

[LABEL] contradiction [PRED] contradiction [COEFF] 5.8543

[P] A woman is wearing a peacock costume.

[H] A woman dressed up as a bumble bee.

[LABEL] contradiction [PRED] contradiction [COEFF] 5.7849

[P] A boy holds a goat in his arms.

[H] The boy is holding a kitten.

[LABEL] contradiction [PRED] contradiction [COEFF] 5.7817

[P] The man in the cap is handing a fishing net to the man in the black top while others are looking on.

[H] The man in the cap is handing a bucket to the man in the black top.

[LABEL] contradiction [PRED] contradiction [COEFF] 5.5933

[P] A cattle dog nips the leg of an animal.

[H] A dog grabs a stick.

[LABEL] contradiction [PRED] contradiction [COEFF] 5.5298

[P] A small brown dog playing with bubbles in grass.

[H] The brown dog is playing with a bone.

[LABEL] contradiction [PRED] contradiction [COEFF] 5.4909

[P] A man in a black shirt holding a smiling baby.

[H] The man is holding a puppy.

[LABEL] contradiction [PRED] contradiction [COEFF] 5.0804

[P] A little girl eating a sucker.

[H] A little girl is eating a hot dog.

[LABEL] contradiction [PRED] contradiction [COEFF] 4.8240

[P] Baseball player holding a bat.

[H] The ballplayer is holding an anvil.

[LABEL] contradiction [PRED] contradiction [COEFF] 4.7729

[P] A man is holding a blue candle.

[H] The man is holding a cake.

[LABEL] contradiction [PRED] contradiction [COEFF] 4.7561

[P] Two people in red traditional chinese garb are performing with sticks

[H] Two people wearing red traditional chinese garb are performing a ritual with swords

[LABEL] contradiction [PRED] contradiction [COEFF] 4.7325

[P] Two men, one in a hat and tie die shirt, one in green hooded jacket, staring at a large soap bubble.

[H] The men are staring at a zebra.

[LABEL] contradiction [PRED] contradiction [COEFF] 4.5895

[P] A little boy in an oversized cap is eating a popsicle.

[H] Boy eats a hot dog.

## 1.495 Component 494

[LABEL] contradiction [PRED] contradiction [COEFF] 10.2313

[P] A man is sitting down at a table in a plastic enclosure and gazes out at a young woman passing by.

[H] Nobody is passing by.

[LABEL] contradiction [PRED] contradiction [COEFF] 9.6960

[P] A young girl, wearing a matching red hat, scarf and boots, bravely jumps above a patch of ice.

[H] Nobody is jumping.

[LABEL] contradiction [PRED] contradiction [COEFF] 9.6269

[P] Four children carrying backpacks turn to face the camera and smile as they walk down a country road.

[H] Nobody is walking

[LABEL] contradiction [PRED] contradiction [COEFF] 8.9486

[P] A man, woman, and little girl walk along a boardwalk beside a calm sea.

[H] Nobody is walking

[LABEL] contradiction [PRED] contradiction [COEFF] 8.6467

[P] A child is crying out while being held by a woman in a pink shirt.

[H] Nobody is crying

[LABEL] contradiction [PRED] contradiction [COEFF] 8.2502

[P] A little boy is jumping into an outdoor kiddie pool

[H] Nobody is jumping

[LABEL] contradiction [PRED] contradiction [COEFF] 8.1918

[P] A young blond boy and blond girl are drawing pictures on white paper with a box of crayola crayons while seated at a table.

[H] Nobody is drawing

[LABEL] contradiction [PRED] contradiction [COEFF] 8.1178

[P] Two men play music near a mossy building, one a violin and the other a metal drum, as a man watches in the distance.

[H] Nobody is playing

[LABEL] contradiction [PRED] contradiction [COEFF] 8.1165

[P] An elderly man communicates with a man and a woman.

[H] Nobody is communicating

[LABEL] contradiction [PRED] contradiction [COEFF] 8.1062

[P] A young girl pulling the tail of an alligator statue

[H] Nobody is pulling

[LABEL] contradiction [PRED] contradiction [COEFF] 8.0710

[P] Hanging out at the park, couple stops to take some pictures.

[H] Nobody is taking pictures

[LABEL] **contradiction** [PRED] **contradiction** [COEFF] 8.0100

[P] A woman, in a red swimsuit, is adjusting her swimming goggles while standing by a pool.

[H] Nobody is adjusting

[LABEL] **contradiction** [PRED] **contradiction** [COEFF] 7.7818

[P] The bicyclists are getting ready for the race, grabbing for their bikes, their ultimate tools for pounding their way to the finish line in this race.

[H] Nobody is grabbing

[LABEL] **contradiction** [PRED] **contradiction** [COEFF] 7.6517

[P] A woman getting out of a pool and a man in the pool.

[H] Nobody is in the pool

[LABEL] **contradiction** [PRED] **contradiction** [COEFF] 7.5068

[P] Two boys splash in the big ocean.

[H] Nobody is splashing

[LABEL] **contradiction** [PRED] **contradiction** [COEFF] 7.4197

[P] A little girl is sitting outside on a set of steps with her hands covering her face as if she is sad or scared.

[H] Nobody is sitting

## 1.496 Component 495

[LABEL] **entailment** [PRED] **entailment** [COEFF] 16.6137

[P] A baby in pink clothes staring at corn on the cob

[H] A person in pink clothes staring at corn on the cob

[LABEL] **entailment** [PRED] **entailment** [COEFF] 15.9333

[P] A woman handing a small child wearing a red shirt an item from a shopping basket.

[H] A woman handing a child something

[LABEL] **entailment** [PRED] **entailment** [COEFF] 15.8688

[P] People sit on the curb watching an event.

[H] People sitting on curb

[LABEL] **entailment** [PRED] **entailment** [COEFF] 15.7368

[P] A woman dressed as a mermaid for an event.

[H] A woman dressed as a mermaid

[LABEL] **entailment** [PRED] **entailment** [COEFF] 14.2421

[P] A crowd in a daily routine in an asian suburb.

[H] A crowds daily routine in an asian neighborhood

[LABEL] entailment [PRED] entailment [COEFF] 14.1336

[P] A woman in a skirt and boots with a red bag walking down the sidewalk.

[H] A woman in a skirt and boots

[LABEL] entailment [PRED] entailment [COEFF] 13.8112

[P] A baby in an orange t - shirt holds onto his stroller like a steering wheel.

[H] A baby in a stroller

[LABEL] entailment [PRED] entailment [COEFF] 13.5833

[P] Two pink poodles on pink leashes.

[H] Two poodles on leashes

[LABEL] entailment [PRED] entailment [COEFF] 13.5310

[P] A man wearing a kilt leans against a poll holding a large wrapped item.

[H] A man wears a kilt

[LABEL] entailment [PRED] entailment [COEFF] 13.0680

[P] Several young people in life jackets are sitting on something floating in water.

[H] Young people in life jackets.

[LABEL] entailment [PRED] entailment [COEFF] 13.0170

[P] A person aquestrian horse jumping over a wooden fence.

[H] A person horse jumping

[LABEL] entailment [PRED] entailment [COEFF] 12.9435

[P] A little girl with a ribbon in her hair is picking her nose.

[H] A girl picking her nose

[LABEL] entailment [PRED] entailment [COEFF] 12.7892

[P] A white dog standing on leaves on the ground.

[H] A white dog

[LABEL] entailment [PRED] entailment [COEFF] 12.7362

[P] A young boy is using a vacuum cleaner.

[H] Young boy using vacuum cleaner

[LABEL] entailment [PRED] entailment [COEFF] 12.3017

[P] A woman in a red bikini is lounging by the pool.

[H] Woman lounging by the pool

[LABEL] entailment [PRED] entailment [COEFF] 12.2582

[P] A guy seems to be getting a lot of love as he poses in front of a lighthouse with a suave demeanor across his face.

[H] Guy in front of a lighthouse



## 1.497 Component 496

[LABEL] **contradiction** [PRED] **contradiction** [COEFF] 16.7802

[P] A baby is wearing red shorts.

[H] A baby is wearing sweatpants.

[LABEL] **contradiction** [PRED] **contradiction** [COEFF] 15.5240

[P] A man in an orange jacket and pants standing in the street looking at a orange truck.

[H] A man washing the windows of a office building

[LABEL] **contradiction** [PRED] **contradiction** [COEFF] 15.4393

[P] A woman in a jacket looking at a lake.

[H] A woman is drinking coffee in a cabin.

[LABEL] **contradiction** [PRED] **contradiction** [COEFF] 13.0582

[P] One wrestler walks away from a wrestler curled up on the floor as a referee looks on.

[H] Two wrestlers are stretching in the locker room.

[LABEL] **contradiction** [PRED] **contradiction** [COEFF] 12.8306

[P] Next to two men in orange uniforms, a man in a gray sweatshirt places his arms over a wall and looks down.

[H] A man is fixing his car while two men in jumpsuits are lazing about outside.

[LABEL] **contradiction** [PRED] **contradiction** [COEFF] 12.7929

[P] The man in the red sweatshirt has his hair in dreadlocks.

[H] A bald man in a suit.

[LABEL] **neutral** [PRED] **contradiction** [COEFF] 12.7853

[P] A woman wearing shorts walks down the busy streets of a city.

[H] The woman walking down the street is wearing jogging shoes.

[LABEL] **contradiction** [PRED] **contradiction** [COEFF] 12.6957

[P] A man in an orange shirt with an orange ladder next to a brick wall.

[H] A boy on a fire engine.

[LABEL] **contradiction** [PRED] **contradiction** [COEFF] 12.5962

[P] Two men sitting in chairs while waiting.

[H] A surgeon is cutting into a patient in a brightly - lit operating room.

[LABEL] **contradiction** [PRED] **contradiction** [COEFF] 11.3766

[P] Window washers cleaning off huge glass window.

[H] A man smears mud on his jeans

[LABEL] **contradiction** [PRED] **contradiction** [COEFF] 11.2580

[P] Woman in a pink shirt and wearing glasses.

[H] The woman is wearing a blue bikini.

[LABEL] **contradiction** [PRED] **contradiction** [COEFF] 11.1835

[P] A lady in a red jacket talking to a man with a cane.

[H] A man in a wheelchair screams at a little girl.

[LABEL] **contradiction** [PRED] **contradiction** [COEFF] 11.0895

[P] A person in a black and red jacket walking up a snowy mountain.

[H] A woman in yellow runs down a hill.

[LABEL] **contradiction** [PRED] **contradiction** [COEFF] 11.0761

[P] A child in a gray sweatshirt is on a red slide.

[H] A girl jumps off a swing on a playground.

[LABEL] **contradiction** [PRED] **contradiction** [COEFF] 10.9159

[P] A caucasian male toddler sweeps the tiled floor.

[H] A black child washes a window.

[LABEL] **contradiction** [PRED] **contradiction** [COEFF] 10.9012

[P] Two people sitting down outside of a glass building.

[H] Two people sleeping in a store.

## 1.498 Component 497

[LABEL] **contradiction** [PRED] **contradiction** [COEFF] 5.2079

[P] A tan dog walks through a field of colorful flowers.

[H] The dog is black.

[LABEL] **contradiction** [PRED] **contradiction** [COEFF] 5.0252

[P] A woman sits on a park bench eating ice cream.

[H] A woman is eating a hot dog.

[LABEL] **contradiction** [PRED] **contradiction** [COEFF] 4.6567

[P] A little boy in an oversized cap is eating a popsicle.

[H] Boy eats a hot dog.

[LABEL] **contradiction** [PRED] **contradiction** [COEFF] 4.4712

[P] The vendor is holding a lot of balloons created in the shape of disney characters.

[H] A man is selling hot dogs.

[LABEL] **contradiction** [PRED] **contradiction** [COEFF] 4.2580

[P] A girl with a large pink bow in her hair puts herbs into a clear plastic bag at a market.

[H] The girl is wearing a white bow

[LABEL] **contradiction** [PRED] **contradiction** [COEFF] 4.0571

[P] A couple eats ice cream in the park.

[H] A couple is eating pizza.

[LABEL] **contradiction** [PRED] **contradiction** [COEFF] 3.8577

[P] A young woman wearing a purple hat with a pink feather in it  
[H] The woman is wearing a black helmet.

[LABEL] **contradiction** [PRED] **contradiction** [COEFF] 3.8528

[P] A group of women are standing around an old fashioned ice cream truck.  
[H] The women are buying hamburgers.

[LABEL] **contradiction** [PRED] **contradiction** [COEFF] 3.6476

[P] A boy is pushing a soccer ball past the keeper who is sliding out to get the ball.  
[H] A boy is kicking a basketball past the keeper.

[LABEL] **contradiction** [PRED] **contradiction** [COEFF] 3.5741

[P] A little girl wears a white dress and pink flip - flops.  
[H] The girl is wearing pants and boots.

[LABEL] **contradiction** [PRED] **contradiction** [COEFF] 3.5454

[P] A woman eats a salad in a stadium.  
[H] A woman is eating a hot dog.

[LABEL] **contradiction** [PRED] **contradiction** [COEFF] 3.5367

[P] Two women wearing graduation hats and robes are smiling.  
[H] Two women are wearing jeans and are frowning.

[LABEL] **contradiction** [PRED] **contradiction** [COEFF] 3.4540

[P] A bike sits atop a rise with mountains in the background.  
[H] The bike is underwater

[LABEL] **neutral** [PRED] **contradiction** [COEFF] 3.3703

[P] A family doing a picnic in the park.  
[H] A family is eating hot dogs.

[LABEL] **neutral** [PRED] **contradiction** [COEFF] 3.3480

[P] Two workers in a store are wearing aprons.  
[H] The two workers are in a restaurant.

[LABEL] **neutral** [PRED] **contradiction** [COEFF] 3.2842

[P] A small child wearing yellow rides his yellow bike in a city center.  
[H] The child is black.

## 1.499 Component 498

[LABEL] **entailment** [PRED] **entailment** [COEFF] 19.7534

[P] A middle - aged man relaxing on a couch reading a book.  
[H] A man is reading a book on the couch.

[LABEL] **entailment** [PRED] **entailment** [COEFF] 18.2314

[P] A young man, in a red t - shirt, is looking in the camera while he is preparing to cut up two butchered animals.

[H] A man is looking at the camera.

[LABEL] **neutral** [PRED] **entailment** [COEFF] 17.8244

[P] A man in a black outfit wears headphones and sits near a microphone.

[H] A man sits near a microphone

[LABEL] **entailment** [PRED] **entailment** [COEFF] 17.0590

[P] A man in jeans at the beach playing with a red ball.

[H] A man is at the beach

[LABEL] **entailment** [PRED] **entailment** [COEFF] 17.0255

[P] A man with brown hair, glasses and a green shirt sits in front of a computer monitor with a man in a white shirt.

[H] A man sits at a computer.

[LABEL] **entailment** [PRED] **entailment** [COEFF] 16.5747

[P] A man with a blue and yellow bowler hat on is speaking into a headset microphone, while holding a rope.

[H] A man is speaking into a microphone

[LABEL] **entailment** [PRED] **entailment** [COEFF] 14.6785

[P] An asian man in a tan shirt and glasses holds his camera up to take a picture in an art gallery.

[H] A man takes a picture in the art gallery.

[LABEL] **entailment** [PRED] **entailment** [COEFF] 14.6641

[P] A man in a pink shirt stands next to a stack of hats.

[H] A man is next to a bunch of hats.

[LABEL] **entailment** [PRED] **entailment** [COEFF] 14.6557

[P] A man on a ladder paints the side of a building blue.

[H] A man is painting a building.

[LABEL] **neutral** [PRED] **entailment** [COEFF] 14.0913

[P] A man with a long ponytail is working on tiling a floor.

[H] A man working on on tiling a floor.

[LABEL] **entailment** [PRED] **entailment** [COEFF] 13.9649

[P] There is a man in suit speaking at a podium at a protest march.

[H] A man is speaking at a protest

[LABEL] **entailment** [PRED] **entailment** [COEFF] 13.5295

[P] A man sitting on a swing is painting the outside of building.

[H] A man is painting the outside of building.

[LABEL] **entailment** [PRED] **entailment** [COEFF] 13.5232

[P] A man in blue shorts and sitting in the pool watches a boy get out of the water.  
[H] A man is sitting by the pool.

[LABEL] **entailment** [PRED] **entailment** [COEFF] 13.4283  
[P] A man in a blue shirt is sitting beside a blue van  
[H] A man sits beside a van.

[LABEL] **entailment** [PRED] **entailment** [COEFF] 13.1280  
[P] A group of people talking and one man is looking at his laptop.  
[H] A man is looking at a computer in a group of people that are talking.

[LABEL] **entailment** [PRED] **entailment** [COEFF] 13.1061  
[P] A man in a blue hat is driving a blue car.  
[H] A man is driving a car

### 1.500 Component 499

[LABEL] **contradiction** [PRED] **contradiction** [COEFF] 21.3333  
[P] Three traffic lights hang over wilson street.  
[H] There are no lights on wilson street.

[LABEL] **contradiction** [PRED] **contradiction** [COEFF] 20.8565  
[P] A security guard on watch duty at the museum.  
[H] The museum has no security personnel.

[LABEL] **contradiction** [PRED] **contradiction** [COEFF] 18.3435  
[P] Three people sit around a table with a laptop and food on it.  
[H] There are no people at the table.

[LABEL] **contradiction** [PRED] **contradiction** [COEFF] 18.1423  
[P] A man is in an ornate, wood paneled room, standing and playing an unusual semi - circular instrument while being accompanied by a wind ensemble composed of young people who are sitting behind him.  
[H] A man doesn't play an instrument.

[LABEL] **contradiction** [PRED] **contradiction** [COEFF] 17.6524  
[P] A crowd in an auditorium is watching as an older man is having his facial hair trimmed by another man.  
[H] There is no crowd in the auditorium.

[LABEL] **contradiction** [PRED] **contradiction** [COEFF] 17.3905  
[P] The snowboarder is wearing a red jacket and black helmet.  
[H] The snowboarder isn't wearing a helmet.

[LABEL] **contradiction** [PRED] **contradiction** [COEFF] 16.9746  
[P] A girl in gold and purple is holding a rainbow afghan.  
[H] A girl is not holding anything.

[LABEL] contradiction [PRED] contradiction [COEFF] 16.7987

[P] A hot air balloon is filled with twelve different people, all wearing black, blue red or white.

[H] There is no hot air balloon.

[LABEL] contradiction [PRED] contradiction [COEFF] 16.7521

[P] Dilapidated buildings in the background of a lot of green grass.

[H] There is no grass.

[LABEL] contradiction [PRED] contradiction [COEFF] 16.4849

[P] A woman in a red jacket taking photos is sitting on the shoulders of another woman among a crowd of people.

[H] There are no women taking pictures.

[LABEL] contradiction [PRED] contradiction [COEFF] 16.4634

[P] Six children at a table.

[H] There are no children at the table

[LABEL] contradiction [PRED] contradiction [COEFF] 16.2282

[P] Two construction workers are standing behind a fence with an orange moped in the fore - ground.

[H] There is no moped.

[LABEL] contradiction [PRED] contradiction [COEFF] 15.6959

[P] Three people running a race next to a body of water.

[H] No one is racing by water.

[LABEL] contradiction [PRED] contradiction [COEFF] 15.5770

[P] Two women walk down some stairs with intricate designs on the railings

[H] There were no railings on the stairs.

[LABEL] contradiction [PRED] contradiction [COEFF] 15.5298

[P] One adult and three children gathered on the floor looking at a picture on a digital camera.

[H] No one is looking at a picture.

[LABEL] contradiction [PRED] contradiction [COEFF] 15.1908

[P] A boy with a dish of food balanced on his head sits next to another boy in a green jacket.

[H] There's no food items depicted.

## 1.501 Component 500

[LABEL] contradiction [PRED] contradiction [COEFF] 5.2418

[P] Three men sit on top of a green tank.

[H] The three men are on top of a tree.

[LABEL] contradiction [PRED] contradiction [COEFF] 4.7784

[P] People waiting to get on a train.

[H] A group of people are on a plane.

[LABEL] contradiction [PRED] contradiction [COEFF] 4.1727

[P] A girl with bright red - hair and black clothes is posing on a tree trunk.

[H] A girl sits on a curb.

[LABEL] contradiction [PRED] contradiction [COEFF] 4.1470

[P] A child wearing a black cap with an orange stripe is in a snow tunnel.

[H] A child is in a beach house.

[LABEL] contradiction [PRED] contradiction [COEFF] 4.1031

[P] A man is preparing to get on his bicycle.

[H] The man is getting into a car.

[LABEL] contradiction [PRED] contradiction [COEFF] 3.9810

[P] Three guys riding on an elephant with a house - like structures and trees in the background.

[H] Three men are riding on a donkey through a neighborhood.

[LABEL] contradiction [PRED] contradiction [COEFF] 3.9665

[P] Bikers race through a forest.

[H] Bikers race through a busy street.

[LABEL] contradiction [PRED] contradiction [COEFF] 3.9408

[P] A young child is playing in a fountain.

[H] Th child is playing in the mud.

[LABEL] contradiction [PRED] contradiction [COEFF] 3.9290

[P] Two men wearing a hat are holding on to their bikes.

[H] Two men are in a boat.

[LABEL] contradiction [PRED] contradiction [COEFF] 3.8661

[P] White bird sitting in water spreading its wings

[H] The bird is sitting in a tree.

[LABEL] contradiction [PRED] contradiction [COEFF] 3.7941

[P] A old man and a woman stand in the woods.

[H] Two people are standing in a shopping mall.

[LABEL] contradiction [PRED] contradiction [COEFF] 3.7660

[P] A woman with long brown hair wearing a white sleeveless shirt, a man with long brown hair wearing a green t - shirt and tattoos on his arms, and another woman with black hair wearing a green dress, also with tattoos, are in the checkout line at a supermarket.

[H] They are at the checkout line at the bar.

[LABEL] contradiction [PRED] contradiction [COEFF] 3.7566

[P] A person in black parachutes down to the ground with the american flag

[H] A man in black walks down the street with a chinese flag.

[LABEL] contradiction [PRED] contradiction [COEFF] 3.7539  
[P] The little girl in the pink shirt is running under a tree in the desert.  
[H] The girl is running under a tree in the forest.

[LABEL] contradiction [PRED] contradiction [COEFF] 3.7491  
[P] A group of people standing near a boat on a body of water.  
[H] A group of people standing in a house.

[LABEL] contradiction [PRED] contradiction [COEFF] 3.7093  
[P] Black dog prancing through the river.  
[H] A black dog is running through the snow.

## 1.502 Component 501

[LABEL] contradiction [PRED] contradiction [COEFF] 46.3060  
[P] A man in a black jacket is beside the window of a coffee shop looking down.  
[H] A man is sleeping.

[LABEL] contradiction [PRED] contradiction [COEFF] 42.8475  
[P] The dog is wearing a pink sweater.  
[H] The dog is sleeping.

[LABEL] contradiction [PRED] contradiction [COEFF] 41.1921  
[P] A young boy in a spiderman shirt stands on the bottom step of a staircase.  
[H] A boy is sleeping.

[LABEL] contradiction [PRED] contradiction [COEFF] 37.6513  
[P] A child wearing shorts is moving a window screen.  
[H] The child is sleeping.

[LABEL] contradiction [PRED] contradiction [COEFF] 36.5150  
[P] A toddler in a pink dress walks through the grass.  
[H] The toddler is sleeping.

[LABEL] contradiction [PRED] neutral [COEFF] 33.7755  
[P] A brown dog and a black dog are together in tall grass.  
[H] The dogs are sleeping.

[LABEL] contradiction [PRED] contradiction [COEFF] 33.5714  
[P] A woman with red - hair sitting in a chair.  
[H] The woman is sleeping.

[LABEL] contradiction [PRED] contradiction [COEFF] 32.9487  
[P] A young girl mixes flour at a kitchen counter.  
[H] The girl is sleeping.



[LABEL] **contradiction** [PRED] **contradiction** [COEFF] 32.9392

[P] A woman in the shadows with a redhead rag around her neck.

[H] The woman is sleeping.

[LABEL] **contradiction** [PRED] **contradiction** [COEFF] 31.8698

[P] A brown dog plays with the hose.

[H] The dog is sleeping.

[LABEL] **contradiction** [PRED] **contradiction** [COEFF] 31.7593

[P] There is a man with a brown hat lighting a cigarette.

[H] A man is sleeping.

[LABEL] **contradiction** [PRED] **contradiction** [COEFF] 31.7113

[P] Woman in a red headscarf covering her face.

[H] A woman is sleeping

[LABEL] **contradiction** [PRED] **contradiction** [COEFF] 31.6530

[P] A woman is talking to a man in a white shirt and bandanna.

[H] The woman is sleeping.

[LABEL] **contradiction** [PRED] **contradiction** [COEFF] 30.9109

[P] A man sets up a red ladder in a yard.

[H] A man is sleeping.

[LABEL] **contradiction** [PRED] **contradiction** [COEFF] 29.9930

[P] A man looking down at a large pile of shredded paper.

[H] The man is sleeping

[LABEL] **contradiction** [PRED] **contradiction** [COEFF] 28.8075

[P] A young male child with curly brown hair, hiding behind a cardboard box in a vegetable vendor's market.

[H] The boy is sleeping.

### 1.503 Component 502

[LABEL] **entailment** [PRED] **entailment** [COEFF] 8.5308

[P] Two swimmers in the water, each in his own lane, gathering a breath mid - stroke.

[H] Two people are swimming.

[LABEL] **neutral** [PRED] **entailment** [COEFF] 6.9630

[P] An asian girl wearing a white leotard and white stockings stands on her tiptoes as she dances ballet.

[H] A girl is performing.

[LABEL] **entailment** [PRED] **entailment** [COEFF] 6.8861

[P] Two motorists are riding along on their vehicle that is oddly designed and colored.

[H] Two people in a vehicle.

[LABEL] entailment [PRED] entailment [COEFF] 6.3920  
[P] Three kids on a scooter with three wheels.  
[H] Children are riding a vehicle.

[LABEL] entailment [PRED] entailment [COEFF] 5.8484  
[P] Two cyclists competing in road race, one in front of the other.  
[H] Two people are racing.

[LABEL] neutral [PRED] entailment [COEFF] 5.2746  
[P] A sponsored motorcyclist is making a turn on a racing circuit.  
[H] A person is competing in a race.

[LABEL] entailment [PRED] entailment [COEFF] 5.1983  
[P] Two guys in blue shirts are standing on top of a construction surface doing construction work.  
[H] The two men are working on a job.

[LABEL] entailment [PRED] entailment [COEFF] 5.1966  
[P] Two motorcycles racers make sharp right turn on the racetrack.  
[H] There are two people riding motorcycles.

[LABEL] entailment [PRED] entailment [COEFF] 5.0523  
[P] Three painters wearing pink overalls work on a very tall door.  
[H] Three people are painting a door.

[LABEL] entailment [PRED] entailment [COEFF] 5.0443  
[P] Two ballet dancers are in the middle of a choreographed dance.  
[H] The two people are doing ballet.

[LABEL] neutral [PRED] entailment [COEFF] 4.7584  
[P] Many cyclists race down a road in uniform.  
[H] There are people in a race.

[LABEL] entailment [PRED] entailment [COEFF] 4.7051  
[P] A crosscountry biker with helmet and sports gears ( green and black ) is jumping in the air with his bike that has dirty tires.  
[H] A biker performs a stunt.

[LABEL] entailment [PRED] entailment [COEFF] 4.6144  
[P] A cowboy rides a bucking brown horse for a crowd of people sitting in bleachers outdoors on a sunny day.  
[H] A cowboy is on a horse.

[LABEL] entailment [PRED] entailment [COEFF] 4.6026  
[P] A dark - haired gentleman with a mustache and wearing a sweater is simultaneously pressing buttons on an old - fashioned computer monitor and the keyboard.  
[H] A man uses an old computer.

[LABEL] entailment [PRED] entailment [COEFF] 4.5227  
[P] Two female cheerleaders are doing a cheer while being lifted into the air by male cheerleaders.  
[H] There are people practicing cheerleading.

[LABEL] entailment [PRED] entailment [COEFF] 4.4907  
[P] It is two track runners that just got done running a track race.  
[H] Two people were in a race.

## 1.504 Component 503

[LABEL] contradiction [PRED] contradiction [COEFF] 28.7507  
[P] A woman in a red shirt and eyeglasses is seated on a beige couch smiling up at the camera showing a just unwrapped gift.  
[H] A man in a red shirt and eyeglasses is seated on a beige couch smiling up at the camera showing a just unwrapped gift.

[LABEL] contradiction [PRED] contradiction [COEFF] 21.8352  
[P] Four woman are playing on a beach as a huge ship passes in the background.  
[H] Four men play on a beach.

[LABEL] contradiction [PRED] contradiction [COEFF] 21.4064  
[P] Three woman sit at a table littered with books and write down things in notebooks.  
[H] Three men sit at a table littered with books and write down things in notebooks.

[LABEL] contradiction [PRED] contradiction [COEFF] 20.4584  
[P] A woman in a yellow jacket following two other women.  
[H] A man in a yellow jacket following two other women.

[LABEL] contradiction [PRED] contradiction [COEFF] 20.4074  
[P] A young woman celebrates a victory by knocking down all the pins at the bowling alley.  
[H] A young man celebrates a victory by knocking down all the pins at the bowling alley.

[LABEL] contradiction [PRED] contradiction [COEFF] 20.0640  
[P] A long - haired lady performs in an equestrian event by the sea side.  
[H] The man with long hair is performing.

[LABEL] contradiction [PRED] contradiction [COEFF] 19.7888  
[P] A woman riding a bicycle next to a field.  
[H] There is a man riding a bicycle.

[LABEL] contradiction [PRED] contradiction [COEFF] 19.6025  
[P] Two elderly women enjoying sandwiches on a bench.  
[H] Two elderly men enjoying sandwiches on a bench.

[LABEL] contradiction [PRED] contradiction [COEFF] 19.5969  
[P] A woman in jeans is balancing on a metal structure.  
[H] A man in jeans is balancing on a metal structure.

[LABEL] contradiction [PRED] contradiction [COEFF] 18.8781  
[P] A woman in sunglasses and a short skirt stands on a street filled with smoke or fog.  
[H] A man in sunglasses and a short skirt stands on a street filled with smoke or fog.

[LABEL] contradiction [PRED] contradiction [COEFF] 17.9411  
[P] Two women holding fast food drinks are laughing.  
[H] The two men are holding fast food drinks.

[LABEL] contradiction [PRED] contradiction [COEFF] 17.7551  
[P] A young lady in a bikini walking in the water on a cloudy day.  
[H] A young man in a bikini walking in the water on a cloudy day.

[LABEL] contradiction [PRED] contradiction [COEFF] 16.8744  
[P] A lady in red pinstripes is surrounded by people taking pictures.  
[H] A man in red pinstripes is surrounded by people taking pictures.

[LABEL] contradiction [PRED] contradiction [COEFF] 16.1994  
[P] A woman in a white kimono wears an earbud headphone in her left ear.  
[H] A man in a white kimono looks at an earbud headphone.

[LABEL] contradiction [PRED] contradiction [COEFF] 15.8194  
[P] A woman laughing and having fun at a bowling alley.  
[H] A man laughing and having fun at a bowling alley.

[LABEL] contradiction [PRED] contradiction [COEFF] 15.6469  
[P] A woman holding a candle with a blue shirt on.  
[H] A man with a candle

## 1.505 Component 504

[LABEL] entailment [PRED] entailment [COEFF] 6.9942  
[P] People are walking on the street, and the young tall guy wearing jeans and t - shirt is talking on the phone.  
[H] A man has a conversation on a telephone as others walk by.

[LABEL] entailment [PRED] entailment [COEFF] 6.6856  
[P] 2 guys one is a gymnast whom is performing, the other stretching and warming up both in red, in a dark room.  
[H] Two fit men are together in a dark room, both wearing red, with one performing as a gymnast, the other warming up.

[LABEL] entailment [PRED] entailment [COEFF] 6.3312  
[P] A woman in a bright blue dress and short black hair looking backward at something.  
[H] A black haired lady looks behind her.

[LABEL] entailment [PRED] entailment [COEFF] 6.2483

[P] A couple of people sit outdoors at a table with an umbrella and talk.  
[H] A few people sit outside at a table having a conversation and one of them has an umbrella.

[LABEL] entailment [PRED] entailment [COEFF] 6.0448

[P] A group of guys from the military helping one of their fellow men with some paperwork.  
[H] Several military men assist a peer.

[LABEL] entailment [PRED] entailment [COEFF] 5.9010

[P] A man and woman dance, while an older woman stands nearby ; other seated women look on in the background.  
[H] A couple dances as people watch.

[LABEL] entailment [PRED] entailment [COEFF] 5.6412

[P] A boat worker grabs a length of mooring rope that is connected to a dock.  
[H] A person who works boats is grabbing the mooring rope that is connected to the dock.

[LABEL] entailment [PRED] entailment [COEFF] 5.6324

[P] People having a good time dancing  
[H] Some humans are dancing and having fun.

[LABEL] entailment [PRED] entailment [COEFF] 5.5896

[P] A woman is sitting down reading a book.  
[H] A woman reads a book while sitting down.

[LABEL] entailment [PRED] entailment [COEFF] 5.5214

[P] A man playing a string instrument at a desk.  
[H] A male musician plays with an instrument at his desk

[LABEL] entailment [PRED] entailment [COEFF] 5.3817

[P] Young man in green shirt play xylophone for crowd in public area.  
[H] A man plays an instrument in front of other people.

[LABEL] entailment [PRED] entailment [COEFF] 5.3766

[P] Two asian women in high heels walk down a dirt street outdoors.  
[H] The women who are walking on a dirt road are wearing high heeled shoes.

[LABEL] entailment [PRED] entailment [COEFF] 5.2178

[P] Two men at a little league baseball game talking on the field.  
[H] Two guys are talking on the field of a little league baseball game.

[LABEL] neutral [PRED] entailment [COEFF] 5.1948

[P] A group of people sift through shelves of books.  
[H] People going through pile of books

[LABEL] entailment [PRED] entailment [COEFF] 5.1152

[P] A guy with a beard and mustache talking on a telephone.  
[H] Bearded man talking on the phone

[LABEL] entailment [PRED] entailment [COEFF] 5.1027

[P] Someone holding a little girl hanging upside down.

[H] A person has a grip on a child while suspended.

## 1.506 Component 505

[LABEL] entailment [PRED] entailment [COEFF] 37.1597

[P] A man in a blue shirt is holding a red ladder for a man in a white shirt near a sign that says "vanguard".

[H] A man in a blue shirt is holding a red ladder for a man in a white shirt near a sign that says vanguard

[LABEL] neutral [PRED] entailment [COEFF] 35.7535

[P] One man wearing a green jacket, blue jeans, boots and a gray cowboy hat standing beside a barn watching the sun

[H] One man wearing a green jacket, blue jeans, boots and a gray cowboy hat standing beside a barn watching the sun rise.

[LABEL] entailment [PRED] entailment [COEFF] 35.4718

[P] A man in a red cap, yellow shirt, and black shorts looks down on a stadium.

[H] A man in a red cap, yellow shirt, and black shorts looks down on a stadium.

[LABEL] entailment [PRED] entailment [COEFF] 34.8355

[P] A tanned - skin female athlete in a purple and white outfit suspends herself in midair against a metal pole.

[H] A tanned skin female athlete in a purple and white outfit suspends herself in midair against a metal pole

[LABEL] neutral [PRED] entailment [COEFF] 30.7503

[P] A man in black laying on a bench with his head on the leg of an elderly gentleman wearing blue jeans.

[H] A man laying on a bench with his head on the leg of an gentleman wearing blue jeans.

[LABEL] entailment [PRED] entailment [COEFF] 28.1224

[P] A black man dressed in a blue shirt and blue jeans walk through a parking lot carrying a white object and a black object.

[H] A black man dressed in a blue shirt and blue jeans walks through a parking lot.

[LABEL] entailment [PRED] entailment [COEFF] 28.0231

[P] A goalie dressed in yellow blocks a ball kicked by a man dress in white and blue.

[H] A goalie dressed in yellow is blocking a ball that was kicked by a man wearing blue and white.

[LABEL] entailment [PRED] entailment [COEFF] 27.9629

[P] A woman with a yellow shirt, hands out chocolate cake to young children.

[H] A woman with a yellow shirt, hands out chocolate cake to young children

[LABEL] entailment [PRED] entailment [COEFF] 27.6370

[P] A white and brown dog is laying down on a red jacket with a rodent standing on it.

[H] A white and brown dog is laying down on a jacket with a rodent standing on it.

[LABEL] **entailment** [PRED] **entailment** [COEFF] 26.9542  
[P] A blond woman wearing glasses and a brown jacket is walking by wooden masks.  
[H] A blond woman wearing glasses and a brown jacket is walking by masks.

[LABEL] **entailment** [PRED] **entailment** [COEFF] 26.4376  
[P] A young boy in a gray beanie is flipping a skateboard off of a curb in an area with graffited walls.  
[H] A young boy in a gray beanie is flipping a skateboard off of a curb.

[LABEL] **entailment** [PRED] **entailment** [COEFF] 25.6866  
[P] A man with a muslim cap, and white beard, stands on the sidewalk holding orange pamphlets.  
[H] A muslim with a white beard, holds orange pamphlets on a sidewalk.

[LABEL] **entailment** [PRED] **entailment** [COEFF] 25.5954  
[P] A little girl wearing a pink and white striped bib is eating oatmeal at a restaurant table.  
[H] A little girl wearing a pink and white striped bib is eating oatmeal at a restaurant table.

[LABEL] **entailment** [PRED] **entailment** [COEFF] 25.4400  
[P] Young girl in a flower dress is peeking through a brown fence.  
[H] A young girl in a floral dress looks through a brown fence.

[LABEL] **entailment** [PRED] **entailment** [COEFF] 24.2978  
[P] A man in a white outfit is washing a tiled surface.  
[H] The man in a white outfit is washing the tile

[LABEL] **entailment** [PRED] **entailment** [COEFF] 24.0215  
[P] A black and white dog is playing with an orange ball in the snow.  
[H] A black and white dog is in the snow playing with an orange ball.

## 1.507 Component 506

[LABEL] **contradiction** [PRED] **contradiction** [COEFF] 6.3712  
[P] An upward looking shot of an electric guitarist against a backdrop of radiating white and red, with wwii bombers.  
[H] A person plays the banjo in a hot air balloon.

[LABEL] **contradiction** [PRED] **contradiction** [COEFF] 6.3491  
[P] A person of color is sitting with a lot of green fruits, with a fence and a green space and the ocean in the background.  
[H] The entire scent is in black and white

[LABEL] **contradiction** [PRED] **contradiction** [COEFF] 5.8194  
[P] Three men, two of them on one soccer team wearing blue, and one man, from the other soccer team wearing red, with the ball in play, controlled by a man in blue.  
[H] The men are playing basketball.

[LABEL] **contradiction** [PRED] **contradiction** [COEFF] 5.6819

[P] Two men, both wearing bright yellow vests and jeans, are working on a roof.

[H] The men are sitting on the ground.

[LABEL] **contradiction** [PRED] **contradiction** [COEFF] 5.4545

[P] Two siblings hiding in tall, vivid green grass.

[H] Two people are running on a beach.

[LABEL] **neutral** [PRED] **contradiction** [COEFF] 5.1970

[P] A man in a gray t - shirt works the bellows to start a fire on a brick oven inside a wooden shed.

[H] A man is lighting a kiln in a studio.

[LABEL] **contradiction** [PRED] **contradiction** [COEFF] 5.1697

[P] Black woman with bags hailing a cab.

[H] The woman is sitting at a bar.

[LABEL] **contradiction** [PRED] **contradiction** [COEFF] 5.1265

[P] Two window - washers are seen from behind hanging by ropes near the top of a white stone building with arched windows.

[H] The building is made of brick.

[LABEL] **contradiction** [PRED] **contradiction** [COEFF] 5.0768

[P] A beautiful picture of the late audrey hepburn sits in the foreground, while a man and a woman talking on a bench sit in the background.

[H] Audrey hepburn is standing by a mountain.

[LABEL] **contradiction** [PRED] **contradiction** [COEFF] 5.0304

[P] A woman in a black dress takes a picture.

[H] A grandmother knits a blanket.

[LABEL] **neutral** [PRED] **contradiction** [COEFF] 4.7385

[P] A man dressed as a pirate talks to a boy in front of a crowd.

[H] The man is an actor.

[LABEL] **contradiction** [PRED] **contradiction** [COEFF] 4.6105

[P] Many people are on a crowded brick path walking downhill towards a distant smoking mountain.

[H] A herd of elephants grazes on the flat savannah, with open meadows as far as the eye can see

[LABEL] **contradiction** [PRED] **contradiction** [COEFF] 4.5575

[P] Male working on a tea pot sitting on the floor of his garage.

[H] A man is sleeping on the floor

[LABEL] **contradiction** [PRED] **contradiction** [COEFF] 4.5551

[P] Two women are sitting in a home snacking on a vegetable tray and discussing the sculpture located behind one of their chairs.

[H] The womn are walking down the stret

[LABEL] **contradiction** [PRED] **contradiction** [COEFF] 4.5446



[P] An artist wearing a red gingham scarf works on a painting of a tower.

[H] An artist is preparing dinner.

[LABEL] **contradiction** [PRED] **contradiction** [COEFF] 4.5182

[P] 3 girls and one boy playing in the street.

[H] The children are all indoors.

## 1.508 Component 507

[LABEL] **neutral** [PRED] **neutral** [COEFF] 25.4113

[P] 14 men standing on a stairway outside almost all wearing the same shirt.

[H] 14 men posing for a picture.

[LABEL] **neutral** [PRED] **neutral** [COEFF] 25.3107

[P] A woman wearing a metallic headdress and costume is swirling colorful scarves around herself.

[H] A woman on stage is dancing.

[LABEL] **neutral** [PRED] **neutral** [COEFF] 24.2121

[P] Two people at the beach facing the water, both are sitting on an elevated wooden platform, wearing red shirts and their heads almost completely shielded by a mounted american flag.

[H] Two people are posing for an american picture.

[LABEL] **neutral** [PRED] **neutral** [COEFF] 24.0047

[P] A one man band with a red umbrella stops in front of a woman with a child in a stroller.

[H] A one man band playing happy birthday for the child in a stroller.

[LABEL] **neutral** [PRED] **neutral** [COEFF] 23.9810

[P] A man in a button up shirt and tie is wearing a smiling mask.

[H] A man is at a costume party.

[LABEL] **neutral** [PRED] **neutral** [COEFF] 23.5056

[P] Three men in black jackets stand by a desk in a field holding red microphones.

[H] Three men are role playing for a concert.

[LABEL] **neutral** [PRED] **contradiction** [COEFF] 22.7481

[P] A group of people who are wearing bright orange jackets and black pants are standing together next to big round cases.

[H] A dance troupe is standing together.

[LABEL] **neutral** [PRED] **neutral** [COEFF] 22.4695

[P] A group of people wearing red shirts and holding drums is being photographed at the boardwalk.

[H] The people are posing for the picture.

[LABEL] **neutral** [PRED] **neutral** [COEFF] 21.9612

[P] A woman is wearing sunglasses and smiling.

[H] A women is posing at camera.

[LABEL] **neutral** [PRED] **neutral** [COEFF] 21.8962  
[P] Overhead shot of woman in red and black walking down the street.  
[H] The woman is wearing a dress.

[LABEL] **neutral** [PRED] **neutral** [COEFF] 21.6070  
[P] A man dressed in black dances with a woman in a red dress outside.  
[H] A man and woman are at a concert in the park.

[LABEL] **neutral** [PRED] **neutral** [COEFF] 21.1811  
[P] Man standing inside a room, with arm extended towards a presentation on the wall.  
[H] The man stands in front of a group of business savvy ladies.

[LABEL] **contradiction** [PRED] **neutral** [COEFF] 20.9970  
[P] The groom stands at a railing by the sea with his arm around the bride.  
[H] An old couple shares an anniversary meal.

[LABEL] **neutral** [PRED] **contradiction** [COEFF] 20.5564  
[P] A group of people wearing life vests standing on a rock.  
[H] People posing for a photo on a rock.

[LABEL] **entailment** [PRED] **neutral** [COEFF] 19.9065  
[P] A woman in a fur coat and hat is looking at flowers  
[H] A woman is shopping.

[LABEL] **neutral** [PRED] **neutral** [COEFF] 19.9014  
[P] A couple covered in paint caught the attention of those in front of them at the fruit stand.  
[H] The people are shopping at an outdoor market

## 1.509 Component 508

[LABEL] **entailment** [PRED] **entailment** [COEFF] 8.6812  
[P] A group of people are sitting around a large white banner that says " from new york. "  
[H] There is a group of people sitting around a large white banner.

[LABEL] **entailment** [PRED] **entailment** [COEFF] 7.8314  
[P] A man in a striped sweater writes on a small rectangular chalkboard.  
[H] A man is writing on a small chalkboard.

[LABEL] **entailment** [PRED] **entailment** [COEFF] 7.3450  
[P] A boy wearing a white hat is running on the beach.  
[H] A boy wearing a white hat.

[LABEL] **entailment** [PRED] **entailment** [COEFF] 6.7477  
[P] A man with a large mustache and purple hat.  
[H] A purple - hatted man with a large mustache.

[LABEL] entailment [PRED] entailment [COEFF] 6.6306

[P] An older man with thin white hair, a beard, and glasses is wearing a white muscle shirt and vest while waiting by the tennis court.

[H] The man is wearing a white shirt

[LABEL] entailment [PRED] entailment [COEFF] 6.4193

[P] A little girl holding a frilly white dress out for the other little girl to examine.

[H] A little girl is holding a dress

[LABEL] entailment [PRED] entailment [COEFF] 6.0067

[P] A girl twirls in a pink dress.

[H] A girl in a pink dress.

[LABEL] entailment [PRED] entailment [COEFF] 5.9945

[P] A female dressed in striped shirt, black high top sneakers and black summer shirt, carrying a green purse, standing in line with a group of guys outside a concert arena.

[H] A female dressed in striped shirt

[LABEL] entailment [PRED] entailment [COEFF] 5.9290

[P] A woman in a pink shirt and patterned skirt plays a violin beside a man wearing track pants and a black hat playing a black guitar on the street.

[H] A woman is wearing a pink shirt

[LABEL] entailment [PRED] entailment [COEFF] 5.7220

[P] A barber wearing his white coat trims the beard of his customer wearing the red apron.

[H] The barber is wearing a white coat.

[LABEL] entailment [PRED] entailment [COEFF] 5.5718

[P] A sailor in a white shirt holding his hand out as men and women pass and go up some stairs.

[H] Sailor in white shirt

[LABEL] entailment [PRED] entailment [COEFF] 5.4817

[P] Small boy in red shorts with blue flowers sitting on shovel in the grass near a tan chair.

[H] Small boy in red shorts.

[LABEL] entailment [PRED] entailment [COEFF] 5.3558

[P] A pretty young adult woman, wearing gray leggings and a bright orange tank top, is sitting on a cement bench with bicycles in the background.

[H] A young woman is sitting on a cement bench.

[LABEL] entailment [PRED] entailment [COEFF] 5.3096

[P] Two patriotic women in the back of a classic convertible ride along in a small parade.

[H] Two women in the back of a classic convertible ride along in a small parade.

[LABEL] entailment [PRED] entailment [COEFF] 5.2072

[P] A woman dancing wearing white in front of a fountain.

[H] A woman in white

[LABEL] entailment [PRED] entailment [COEFF] 5.0719  
[P] A man dressing in a black shirt is waiting to cross the street with traffic.  
[H] A man in a black shirt

### 1.510 Component 509

[LABEL] neutral [PRED] entailment [COEFF] 33.5378  
[P] A dog running on the beach  
[H] The dog runs near water.

[LABEL] neutral [PRED] entailment [COEFF] 27.6449  
[P] A woman in an orange shirt is taking part in physical activity on the beach.  
[H] The woman is near the water.

[LABEL] entailment [PRED] entailment [COEFF] 24.3578  
[P] A man is holding a fishing rod and fishing at sunset.  
[H] A man is near a body of water.

[LABEL] entailment [PRED] entailment [COEFF] 23.6864  
[P] Little girl is on beach and playing with sand  
[H] A young girl is near a body of water.

[LABEL] entailment [PRED] entailment [COEFF] 20.3506  
[P] A man in a small bathing suit talks to another man on the beach in front of a beach patrol stand.  
[H] Two men are talking by the ocean.

[LABEL] entailment [PRED] entailment [COEFF] 18.5187  
[P] A fleet of small fishing boats coming to shore.  
[H] Some boats are in the water.

[LABEL] entailment [PRED] entailment [COEFF] 18.5010  
[P] A woman is sitting on a rock next to a large waterfall.  
[H] The woman sits near the water.

[LABEL] entailment [PRED] entailment [COEFF] 17.5620  
[P] A brown dog sits on the beach.  
[H] A dog next to the ocean.

[LABEL] entailment [PRED] entailment [COEFF] 16.4555  
[P] A woman in a black cap is laying on the beach in a pink bikini.  
[H] A woman is laying by the water

[LABEL] entailment [PRED] entailment [COEFF] 15.6953  
[P] Two children playing in a swimming pool.  
[H] The children are near water.

[LABEL] **neutral** [PRED] **entailment** [COEFF] 15.4308

[P] Two people in red shirts are sitting in a lifeguard chair on a beach with an american flag flying behind them.

[H] Two people are at the ocean.

[LABEL] **entailment** [PRED] **entailment** [COEFF] 15.3848

[P] Eleven people gather in lake, group on left are male and conversing, group on right, male and female, walking further out into lake.

[H] People are by the water.

[LABEL] **entailment** [PRED] **entailment** [COEFF] 14.7471

[P] Two children on surfboards wave to each other.

[H] There are children at the ocean.

[LABEL] **entailment** [PRED] **entailment** [COEFF] 14.6454

[P] A white bird flies over a lake.

[H] A bird is near water.

[LABEL] **entailment** [PRED] **entailment** [COEFF] 14.5485

[P] A person kayaking on a sunny day.

[H] A person is out on the water.

[LABEL] **entailment** [PRED] **entailment** [COEFF] 14.4089

[P] Three young boys playing with the mud on a beach.

[H] Some boy are playing near the water.

## 1.511 Component 510

[LABEL] **neutral** [PRED] **entailment** [COEFF] 17.7884

[P] A man does a trick with his bike overlooking a village.

[H] The man is riding his bike.

[LABEL] **entailment** [PRED] **entailment** [COEFF] 15.9828

[P] A young man runs with goggles above his eyes and a bungee cord tethered to him as a man on a bicycle with a white helmet laughs.

[H] A man is riding a bicycle.

[LABEL] **entailment** [PRED] **entailment** [COEFF] 14.6099

[P] A woman with a white head cover rides a bike on the sidewalk in a city.

[H] The woman is riding a bike.

[LABEL] **entailment** [PRED] **entailment** [COEFF] 14.0889

[P] A man in red and black performing stunts on a bike

[H] A person is riding a bike.

[LABEL] **entailment** [PRED] **entailment** [COEFF] 14.0515

[P] A man on a bicycle carries things and a boy.

[H] A man is riding a bicycle.

[LABEL] **neutral** [PRED] **entailment** [COEFF] 13.5497

[P] An adult and a child sitting on a police motorcycle.

[H] Two people are riding a motorcycle.

[LABEL] **entailment** [PRED] **entailment** [COEFF] 12.3253

[P] Young boy on bicycle jumping off a ramp.

[H] A boy is on a bike.

[LABEL] **entailment** [PRED] **entailment** [COEFF] 12.0761

[P] A girl in a blue shirt rides her bicycle on the sidewalk.

[H] A girl is riding a bike

[LABEL] **entailment** [PRED] **entailment** [COEFF] 10.6990

[P] A man with a cigarette hanging out of his mouth rides a blue motorcycle in front of others on motorcycles.

[H] The man is on a motorcycle.

[LABEL] **entailment** [PRED] **entailment** [COEFF] 10.2644

[P] Man riding on bicycle with white and green bike shirt and helmet.

[H] A person is riding a bike.

[LABEL] **entailment** [PRED] **entailment** [COEFF] 10.2083

[P] A person on a mini motorbike wearing red garment and a cloth to cover her face riding along a road.

[H] A person is riding a motorbike.

[LABEL] **entailment** [PRED] **entailment** [COEFF] 10.1757

[P] A man rides a bicycle with his arm outstretched.

[H] A man on a bicycle

[LABEL] **entailment** [PRED] **entailment** [COEFF] 10.0585

[P] A person on a dirt bike soaring through the air sideways.

[H] A person rides a dirt bike.

[LABEL] **entailment** [PRED] **entailment** [COEFF] 10.0471

[P] A man riding a bike, while two dogs follow him.

[H] The man is riding a bike.

[LABEL] **entailment** [PRED] **entailment** [COEFF] 9.5061

[P] A man rides a bicycle down a road with concrete barriers.

[H] A man is riding a bike.

[LABEL] **entailment** [PRED] **entailment** [COEFF] 9.4694

[P] A man in red biking in a neighborhood.

[H] A man is riding a bicycle.

## 1.512 Component 511

[LABEL] **contradiction** [PRED] **contradiction** [COEFF] 22.7266

[P] A man, wearing a suit with a name tag, is speaking into a microphone, while standing in front of a video presentation.

[H] The man is at home sleeping

[LABEL] **contradiction** [PRED] **contradiction** [COEFF] 16.2590

[P] A man in a red shirt works on a white sculpture.

[H] A man is at home sleeping.

[LABEL] **contradiction** [PRED] **contradiction** [COEFF] 15.0925

[P] A man stands beside a projector in a dimly lit conference room while some people who are wearing dress shirts are talking.

[H] The man is at home sleeping

[LABEL] **contradiction** [PRED] **contradiction** [COEFF] 12.7948

[P] A policeman looks at a man wearing a sailor costume.

[H] A policeman is sleeping at home.

[LABEL] **contradiction** [PRED] **contradiction** [COEFF] 12.0835

[P] A woman in costume is carrying a flag in a parade.

[H] The woman is at home sleeping

[LABEL] **contradiction** [PRED] **contradiction** [COEFF] 10.5469

[P] A person in an orange shirt sits at an office desk and looks at a double computer screen.

[H] The person is asleep at home.

[LABEL] **contradiction** [PRED] **contradiction** [COEFF] 10.4787

[P] A man with glasses and a tootsie pop, browsing through pictures on his digital camera.

[H] The man is at home sleeping

[LABEL] **contradiction** [PRED] **contradiction** [COEFF] 10.3647

[P] A young boy sits at a table and eats as food is spilled all around.

[H] The boy is sleeping at home

[LABEL] **contradiction** [PRED] **contradiction** [COEFF] 10.3202

[P] A man suited in vest, tie, and glasses gives a speech in an art gallery.

[H] The man is sleeping at home.

[LABEL] **contradiction** [PRED] **contradiction** [COEFF] 10.0136

[P] An obese woman holding a chili dog in her right hand.

[H] An obese woman is sleeping at home.

[LABEL] **contradiction** [PRED] **contradiction** [COEFF] 9.8818

[P] A woman in brown pants and a lime green coat, is checking something in the engine of a metallic green

car, in a parking lot.

[H] The woman is asleep at home.

[LABEL] **contradiction** [PRED] **contradiction** [COEFF] 9.7695

[P] One man in a rugby uniform is grabbing the arm of another man holding a football.

[H] The rugby player is asleep at home.

[LABEL] **contradiction** [PRED] **contradiction** [COEFF] 9.7241

[P] A man and woman are kissing and hugging while wearing helmets.

[H] People are at home sleeping

[LABEL] **contradiction** [PRED] **contradiction** [COEFF] 9.5315

[P] Young man playing darts in a curtained room.

[H] A young man is sleeping at home.

[LABEL] **contradiction** [PRED] **contradiction** [COEFF] 9.2732

[P] A woman with dark hair and wearing a black tank - top and dark green skirt with a ruffle, is moving in front of a group of people.

[H] A woman is sitting at home alone

[LABEL] **contradiction** [PRED] **contradiction** [COEFF] 9.1290

[P] A man holds up a plate with food at a park lunch.

[H] A man is sleeping in bed at home.
